# Supplementary material for: Nicotine and oxidative stress induced exomic variations are concordant and overrepresented in cancer-associated genes
Source: PubMed Central journal article supplement (PMC4148099; doi:10.18632/oncotarget.2033), 2014-05-28
Supplement: oncotarget-05-4788-s001.pdf [file oncotarget-05-4788-s001.pdf]

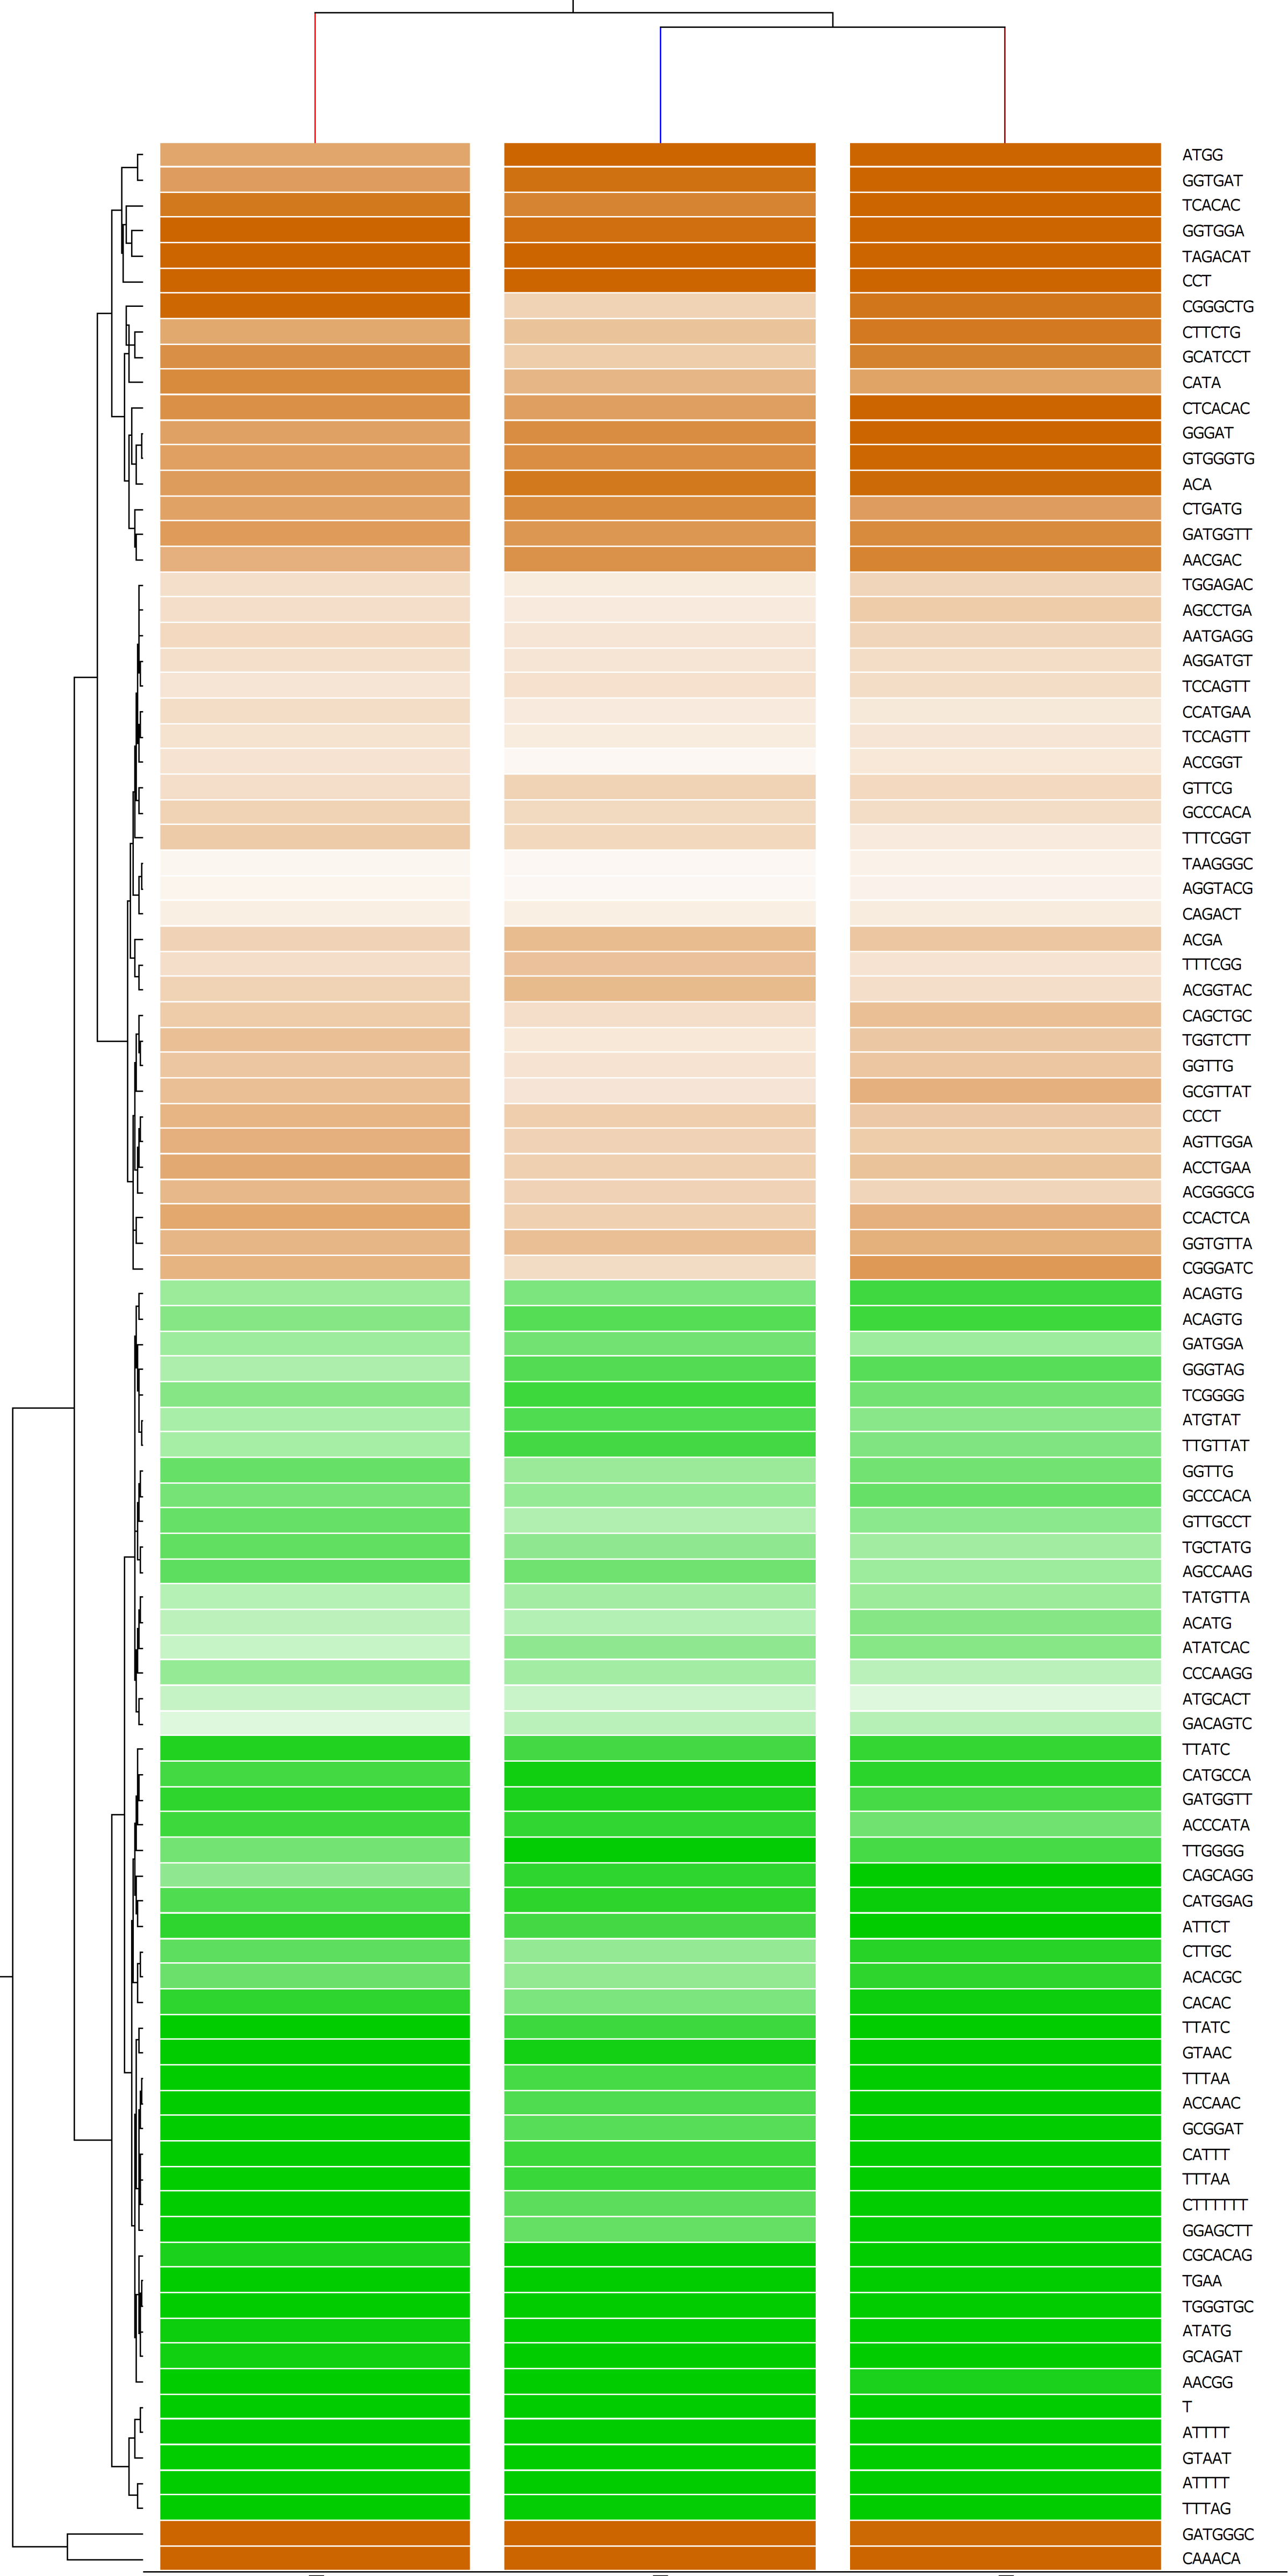

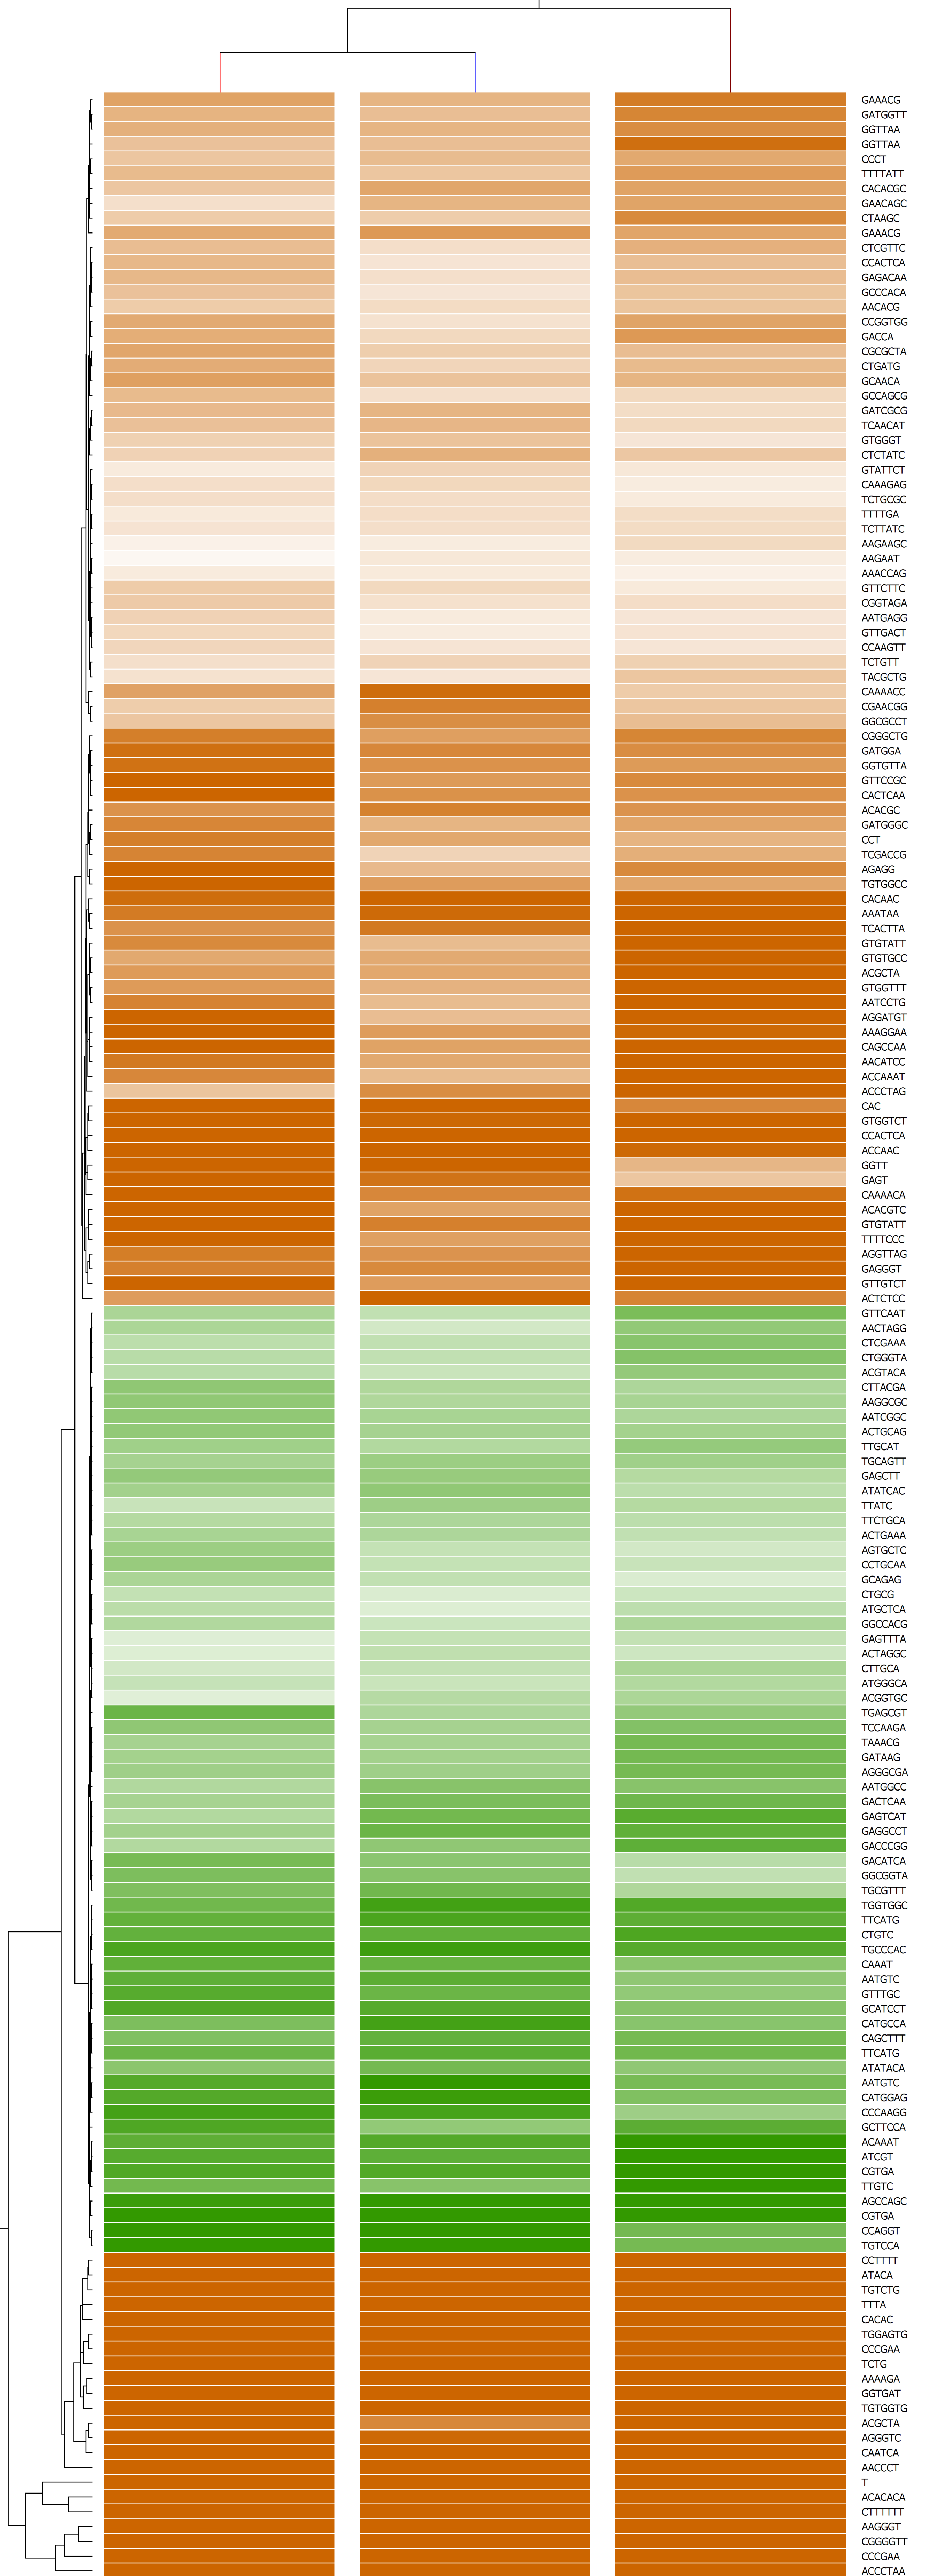

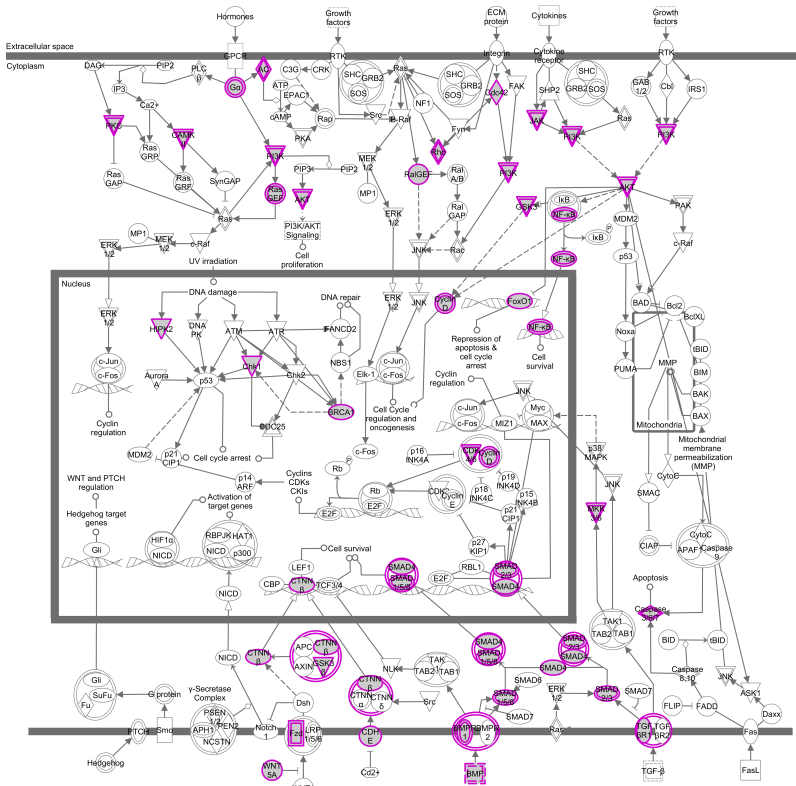

| Common Nicotine Mutations |          |          |      |     |              |              |                      |                                                    |                                                 |             |                |
|---------------------------|----------|----------|------|-----|--------------|--------------|----------------------|----------------------------------------------------|-------------------------------------------------|-------------|----------------|
| Chr                       | Start    | End      | Ref  | Alt | Func.refGene | Gene.refGene | ExonicFunc.refGene   | AAChange.refGene                                   | cosmic64                                        | snp137      | PolyPhen2 Pred |
| chr1                      |          | 69511    | A    | G   | exonic       | OR4F5        | nonsynonymous SNV    | OR4F5:NM_001005484:exon1:c.A421G:p.T141A           | NA                                              | rs2691305   | B              |
| chr1                      | 663506   | 663506   | T    | C   | ncRNA_exonic | LOC100133331 | NA                   | NA                                                 | NA                                              | NA          | NA             |
| chr1                      | 874816   | 874816   | -    | T   | exonic       | SAMD11       | frameshift insertion | SAMD11:NM_152486:exon7:c.682_683insT:p.P228fs      | NA                                              | rs200996316 | NA             |
| chr1                      | 2123473  | 2123473  | T    | C   | UTR3         | C1orf86      | NA                   | NA                                                 | NA                                              | NA          | NA             |
| chr1                      | 3511934  | 3511934  | A    | G   | exonic       | MEGF6        | nonsynonymous SNV    | MEGF6:NM_001409:exon3:c.T344C:p.M115T              | NA                                              | rs7513275   | B              |
| chr1                      | 6526858  | 6526858  | A    | -   | UTR3         | PLEKHG5      | NA                   | NA                                                 | NA                                              | NA          | NA             |
| chr1                      | 10439620 | 10439620 | -    | G   | UTR3         | KIF1B        | NA                   | NA                                                 | NA                                              | NA          | NA             |
| chr1                      | 12203319 | 12203319 | T    | C   | UTR3         | TNFRSF8      | NA                   | NA                                                 | NA                                              | NA          | NA             |
| chr1                      | 12856111 | 12856111 | C    | T   | exonic       | PRAMEF1      | nonsynonymous SNV    | PRAMEF1:NM_023013:exon4:c.C1391T:p.P464L           | NA                                              | rs2982215   | D              |
| chr1                      | 12887453 | 12887453 | C    | T   | exonic       | PRAMEF11     | nonsynonymous SNV    | PRAMEF11:NM_001146344:exon3:c.G404A:p.R135K        | NA                                              | rs2486714   | NA             |
| chr1                      | 12887480 | 12887480 | C    | T   | exonic       | PRAMEF11     | nonsynonymous SNV    | PRAMEF11:NM_001146344:exon3:c.G377A:p.C126Y        | NA                                              | NA          | NA             |
| chr1                      | 12921265 | 12921265 | G    | A   | exonic       | PRAMEF2      | synonymous SNV       | PRAMEF2:NM_023014:exon4:c.G1056A:p.E352E           | NA                                              | rs151184374 | NA             |
| chr1                      | 12921272 | 12921272 | G    | A   | exonic       | PRAMEF2      | nonsynonymous SNV    | PRAMEF2:NM_023014:exon4:c.G1063A:p.V355M           | NA                                              | rs145044541 | B              |
| chr1                      | 12921274 | 12921274 | G    | C   | exonic       | PRAMEF2      | synonymous SNV       | PRAMEF2:NM_023014:exon4:c.G1065C:p.V355V           | NA                                              | rs17039302  | NA             |
| chr1                      | 12953195 | 12953195 | C    | T   | exonic       | PRAMEF10     | nonsynonymous SNV    | PRAMEF10:NM_001039361:exon4:c.G977A:p.R326H        | NA                                              | rs201422133 | B              |
| chr1                      | 12955697 | 12955697 | A    | G   | UTR5         | PRAMEF10     | NA                   | NA                                                 | NA                                              | rs200630847 | NA             |
| chr1                      | 13183780 | 13183780 | A    | C   | exonic       | LOC440563    | synonymous SNV       | LOC440563:NM_001136561:exon2:c.T93G:p.S31S         | ID=COSN199380;OCCURENCE=1(large_intestine)      | rs116484938 | NA             |
| chr1                      | 15439082 | 15439082 | A    | G   | ncRNA_exonic | TMEM51-AS1   | NA                   | NA                                                 | NA                                              | NA          | NA             |
| chr1                      | 15439098 | 15439098 | C    | T   | ncRNA_exonic | TMEM51-AS1   | NA                   | NA                                                 | NA                                              | rs114844404 | NA             |
| chr1                      | 15440343 | 15440343 | T    | G   | ncRNA_exonic | TMEM51-AS1   | NA                   | NA                                                 | NA                                              | NA          | NA             |
| chr1                      | 16133664 | 16133664 | T    | -   | UTR3         | UQCRHL       | NA                   | NA                                                 | NA                                              | NA          | NA             |
| chr1                      | 16385178 | 16385178 | G    | A   | exonic       | FAM131C      | synonymous SNV       | FAM131C:NM_182623:exon7:c.C597T:p.P199P            | ID=COSM676526;OCCURENCE=1(prostate),1(lung)     | rs80297394  | NA             |
| chr1                      | 16890484 | 16890484 | G    | C   | exonic       | NBPF1        | unknown              | UNKNOWN                                            | NA                                              | rs12117084  | NA             |
| chr1                      | 16912164 | 16912164 | C    | T   | exonic       | NBPF1        | unknown              | UNKNOWN                                            | NA                                              | rs201930116 | NA             |
| chr1                      | 16973095 | 16973095 | G    | C   | ncRNA_exonic | MST1P2       | NA                   | NA                                                 | NA                                              | rs75521993  | NA             |
| chr1                      | 16975268 | 16975268 | T    | C   | ncRNA_exonic | MST1P2       | NA                   | NA                                                 | NA                                              | rs199945491 | NA             |
| chr1                      | 17083101 | 17083101 | A    | G   | UTR3         | MST1L        | NA                   | NA                                                 | NA                                              | rs199727569 | NA             |
| chr1                      | 17085872 | 17085872 | A    | G   | exonic       | MST1L        | nonsynonymous SNV    | MST1L:NM_001271733:exon8:c.T949C:p.W317R           | D=COSM1127270,COSM1127271;OCCURENCE=1(prostate) | rs1806514   | NA             |
| chr1                      | 26161107 | 26161108 | AA   | -   | UTR3         | AUNIP        | NA                   | NA                                                 | NA                                              | rs139695812 | NA             |
| chr1                      | 26608823 | 26608823 | A    | G   | exonic       | UBXN11       | synonymous SNV       | S390S,UBXN11:NM_145345:exon15:c.T1431C:p.S477S,UI  | NA                                              | rs61775084  | NA             |
| chr1                      | 28087366 | 28087366 | C    | T   | UTR3         | FAM76A       | NA                   | NA                                                 | NA                                              | NA          | NA             |
| chr1                      | 28087368 | 28087368 | A    | T   | UTR3         | FAM76A       | NA                   | NA                                                 | NA                                              | NA          | NA             |
| chr1                      | 28473786 | 28473786 | T    | G   | UTR3         | PTAFR        | NA                   | NA                                                 | NA                                              | NA          | NA             |
| chr1                      | 33475967 | 33475967 | G    | A   | UTR3         | AK2          | NA                   | NA                                                 | NA                                              | rs74066437  | NA             |
| chr1                      | 38226760 | 38226760 | -    | AA  | UTR3         | EPHA10       | NA                   | NA                                                 | NA                                              | NA          | NA             |
| chr1                      | 39879211 | 39879211 | A    | G   | exonic       | KIAA0754     | nonsynonymous SNV    | KIAA0754:NM_015038:exon1:c.A3274G:p.T1092A         | NA                                              | NA          | NA             |
| chr1                      | 39879379 | 39879379 | C    | G   | exonic       | KIAA0754     | nonsynonymous SNV    | KIAA0754:NM_015038:exon1:c.C3442G:p.P1148A         | NA                                              | rs34074681  | NA             |
| chr1                      | 39976865 | 39976865 | G    | A   | exonic       | BMP8A        | synonymous SNV       | BMP8A:NM_181809:exon2:c.G354A:p.L118L              | NA                                              | NA          | NA             |
| chr1                      | 41979207 | 41979207 | T    | G   | exonic       | HIVEP3       | synonymous SNV       | 714:exon7:c.A5685C:p.S1895S,HIVEP3:NM_024503:exon8 | NA                                              | NA          | NA             |
| chr1                      | 43747937 | 43747937 | -    | A   | UTR3         | C1orf210     | NA                   | NA                                                 | NA                                              | NA          | NA             |
| chr1                      | 47905783 | 47905785 | TTT  | -   | UTR3         | FOXO2        | NA                   | NA                                                 | NA                                              | rs56809638  | NA             |
| chr1                      | 50667062 | 50667062 | -    | A   | UTR3         | ELAVL4       | NA                   | NA                                                 | NA                                              | NA          | NA             |
| chr1                      | 53291327 | 53291328 | AA   | -   | UTR3         | ZYG11B       | NA                   | NA                                                 | NA                                              | NA          | NA             |
| chr1                      | 61922425 | 61922425 | A    | -   | UTR3         | NFIA         | NA                   | NA                                                 | NA                                              | rs67346536  | NA             |
| chr1                      | 65901244 | 65901244 | G    | T   | UTR3         | LEPROT       | NA                   | NA                                                 | NA                                              | NA          | NA             |
| chr1                      | 67465989 | 67465989 | A    | T   | UTR3         | SLC35D1      | NA                   | NA                                                 | NA                                              | NA          | NA             |
| chr1                      | 67874252 | 67874252 | -    | A   | UTR3         | SERBP1       | NA                   | NA                                                 | NA                                              | NA          | NA             |
| chr1                      | 89446108 | 89446108 | T    | -   | UTR3         | RBMXL1       | NA                   | NA                                                 | NA                                              | NA          | NA             |
| chr1                      | 95448279 | 95448279 | G    | A   | UTR3         | ALG14        | NA                   | NA                                                 | NA                                              | NA          | NA             |
| chr1                      | 1.1E+08  | 1.1E+08  | A    | -   | UTR3         | SORT1        | NA                   | NA                                                 | NA                                              | rs111233099 | NA             |
| chr1                      | 1.1E+08  | 1.1E+08  | T    | -   | UTR3         | GNAI3        | NA                   | NA                                                 | NA                                              | NA          | NA             |
| chr1                      | 1.12E+08 | 1.12E+08 | C    | -   | UTR3         | CEPT1        | NA                   | NA                                                 | NA                                              | NA          | NA             |
| chr1                      | 1.15E+08 | 1.15E+08 | G    | T   | exonic       | AMPD1        | synonymous SNV       | 72626:exon3:c.C322A:p.R108R,AMPD1:NM_000036:exon   | NA                                              | NA          | NA             |
| chr1                      | 1.18E+08 | 1.18E+08 | TT   | -   | UTR3         | PTGFRN       | NA                   | NA                                                 | NA                                              | NA          | NA             |
| chr1                      | 1.21E+08 | 1.21E+08 | G    | T   | UTR5         | NOTCH2       | NA                   | NA                                                 | NA                                              | rs57122008  | NA             |
| chr1                      | 1.21E+08 | 1.21E+08 | G    | A   | exonic       | FAM72B       | nonsynonymous SNV    | FAM72B:NM_001100910:exon3:c.G295A:p.G99R           | ID=COSM396486;OCCURENCE=1(lung)                 | rs1055682   | P              |
| chr1                      | 1.45E+08 | 1.45E+08 | TATT | -   | UTR3         | PDE4DIP      | NA                   | NA                                                 | NA                                              | NA          | NA             |
| chr1                      | 1.45E+08 | 1.45E+08 | G    | A   | UTR3         | NOTCH2NL     | NA                   | NA                                                 | NA                                              | rs201876339 | NA             |
| chr1                      | 1.45E+08 | 1.45E+08 | A    | G   | exonic       | NBPF10       | nonsynonymous SNV    | NBPF10:NM_001039703:exon1:c.A110G:p.N37S           | NA                                              | rs12565078  | NA             |
| chr1                      | 1.45E+08 | 1.45E+08 | T    | C   | intronic     | NBPF10       | NA                   | NA                                                 | NA                                              | NA          | NA             |

|      |          |          |        |     |              |          |                   |                                                    |                                        |             |    |
|------|----------|----------|--------|-----|--------------|----------|-------------------|----------------------------------------------------|----------------------------------------|-------------|----|
| chr1 | 1.47E+08 | 1.47E+08 | A      | G   | UTR5         | BCL9     | NA                | NA                                                 | NA                                     | rs10900376  | NA |
| chr1 | 1.51E+08 | 1.51E+08 | -      | A   | UTR3         | GOLPH3L  | NA                | NA                                                 | NA                                     | NA          | NA |
| chr1 | 1.52E+08 | 1.52E+08 | C      | T   | exonic       | RPTN     | nonsynonymous SNV | RPTN:NM_001122965:exon3:c.G1510A:p.G504R           | NA                                     | NA          | B  |
| chr1 | 1.52E+08 | 1.52E+08 | T      | A   | exonic       | HRNR     | synonymous SNV    | HRNR:NM_001009931:exon3:c.A6198T:p.P2066P          | NA                                     | NA          | NA |
| chr1 | 1.52E+08 | 1.52E+08 | C      | T   | exonic       | HRNR     | nonsynonymous SNV | HRNR:NM_001009931:exon3:c.G4241A:p.C1414Y          | NA                                     | rs111689937 | NA |
| chr1 | 1.52E+08 | 1.52E+08 | C      | T   | exonic       | FLG2     | synonymous SNV    | FLG2:NM_001014342:exon3:c.G2595A:p.S865S           | NA                                     | rs12738471  | NA |
| chr1 | 1.53E+08 | 1.53E+08 | A      | G   | UTR3         | LCE1C    | NA                | NA                                                 | NA                                     | NA          | NA |
| chr1 | 1.53E+08 | 1.53E+08 | T      | A   | exonic       | IVL      | nonsynonymous SNV | IVL:NM_005547:exon2:c.T614A:p.L205H                | NA                                     | NA          | NA |
| chr1 | 1.53E+08 | 1.53E+08 | T      | A   | exonic       | IVL      | nonsynonymous SNV | IVL:NM_005547:exon2:c.T929A:p.M310K                | NA                                     | NA          | NA |
| chr1 | 1.54E+08 | 1.54E+08 | C      | A   | UTR3         | GATAD2B  | NA                | NA                                                 | NA                                     | rs72694218  | NA |
| chr1 | 1.54E+08 | 1.54E+08 | -      | A   | UTR3         | TPM3     | NA                | NA                                                 | NA                                     | NA          | NA |
| chr1 | 1.55E+08 | 1.55E+08 | T      | G   | exonic       | KCNN3    | nonsynonymous SNV | 4087:exon1:c.A707C:p.H236P,KCNN3:NM_002249:exon1   | NA                                     | NA          | NA |
| chr1 | 1.6E+08  | 1.6E+08  | AC     | -   | UTR3         | KCNJ10   | NA                | NA                                                 | NA                                     | NA          | NA |
| chr1 | 1.6E+08  | 1.6E+08  | T      | A   | ncRNA_exonic | SUMO1P3  | NA                | NA                                                 | NA                                     | NA          | NA |
| chr1 | 1.61E+08 | 1.61E+08 | C      | G   | UTR3         | MPZ      | NA                | NA                                                 | NA                                     | NA          | NA |
| chr1 | 1.69E+08 | 1.69E+08 | A      | G   | UTR3         | XCL1     | NA                | NA                                                 | NA                                     | rs641500    | NA |
| chr1 | 1.69E+08 | 1.69E+08 | T      | A   | UTR3         | XCL1     | NA                | NA                                                 | NA                                     | rs641496    | NA |
| chr1 | 1.77E+08 | 1.77E+08 | C      | A   | exonic       | FAM5B    | nonsynonymous SNV | FAM5B:NM_021165:exon6:c.C975A:p.D325E              | NA                                     | NA          | B  |
| chr1 | 1.86E+08 | 1.86E+08 | A      | C   | exonic       | PRG4     | nonsynonymous SNV | 7709:exon5:c.A970C:p.T324P,PRG4:NM_001127708:exon  | ID=COSM1127223;OCCURENCE=1(prostate)   | NA          | NA |
| chr1 | 1.86E+08 | 1.86E+08 | T      | C   | exonic       | PRG4     | synonymous SNV    | 7709:exon5:c.T1086C:p.T362T,PRG4:NM_001127708:exon | NA                                     | NA          | NA |
| chr1 | 1.86E+08 | 1.86E+08 | T      | C   | exonic       | PRG4     | synonymous SNV    | 7709:exon5:c.T1110C:p.T370T,PRG4:NM_001127708:exon | ID=COSM424817;OCCURENCE=3(endometrium) | NA          | NA |
| chr1 | 1.86E+08 | 1.86E+08 | A      | C   | exonic       | PRG4     | nonsynonymous SNV | 7709:exon5:c.A1252C:p.T418P,PRG4:NM_001127708:exon | NA                                     | NA          | NA |
| chr1 | 1.86E+08 | 1.86E+08 | T      | C   | exonic       | PRG4     | synonymous SNV    | 7709:exon5:c.T1275C:p.T425T,PRG4:NM_001127708:exon | NA                                     | NA          | NA |
| chr1 | 1.86E+08 | 1.86E+08 | A      | C   | exonic       | PRG4     | nonsynonymous SNV | 7709:exon5:c.A1384C:p.T462P,PRG4:NM_001127708:exon | NA                                     | NA          | NA |
| chr1 | 1.86E+08 | 1.86E+08 | G      | C   | exonic       | PRG4     | synonymous SNV    | 7709:exon5:c.G1596C:p.T532T,PRG4:NM_001127708:exon | NA                                     | NA          | NA |
| chr1 | 1.97E+08 | 1.97E+08 | C      | A   | exonic       | CFHR2    | nonsynonymous SNV | CFHR2:NM_005666:exon2:c.C76A:p.P26T                | NA                                     | NA          | D  |
| chr1 | 2.01E+08 | 2.01E+08 | T      | C   | exonic       | IGFN1    | nonsynonymous SNV | IGFN1:NM_001164586:exon12:c.T4823C:p.V1608A        | NA                                     | rs201505263 | NA |
| chr1 | 2.01E+08 | 2.01E+08 | T      | G   | exonic       | IGFN1    | nonsynonymous SNV | IGFN1:NM_001164586:exon12:c.T5747G:p.V1916G        | NA                                     | rs200871453 | NA |
| chr1 | 2.01E+08 | 2.01E+08 | C      | G   | exonic       | IGFN1    | nonsynonymous SNV | IGFN1:NM_001164586:exon12:c.C6395G:p.T2132R        | NA                                     | NA          | NA |
| chr1 | 2.01E+08 | 2.01E+08 | A      | -   | UTR3         | TNNI1    | NA                | NA                                                 | NA                                     | rs35058233  | NA |
| chr1 | 2.02E+08 | 2.02E+08 | C      | -   | UTR3         | IPO9     | NA                | NA                                                 | NA                                     | rs112011484 | NA |
| chr1 | 2.02E+08 | 2.02E+08 | A      | -   | UTR3         | ELF3     | NA                | NA                                                 | NA                                     | rs11303270  | NA |
| chr1 | 2.02E+08 | 2.02E+08 | A      | C   | UTR3         | GPR37L1  | NA                | NA                                                 | NA                                     | NA          | NA |
| chr1 | 2.02E+08 | 2.02E+08 | TT     | -   | UTR3         | GPR37L1  | NA                | NA                                                 | NA                                     | NA          | NA |
| chr1 | 2.05E+08 | 2.05E+08 | T      | C   | UTR5         | CDK18    | NA                | NA                                                 | NA                                     | rs77694338  | NA |
| chr1 | 2.06E+08 | 2.06E+08 | G      | C   | UTR3         | RAB7L1   | NA                | NA                                                 | NA                                     | rs823134    | NA |
| chr1 | 2.07E+08 | 2.07E+08 | AC     | -   | UTR3         | PIGR     | NA                | NA                                                 | NA                                     | NA          | NA |
| chr1 | 2.08E+08 | 2.08E+08 | T      | C   | UTR5         | CR2      | NA                | NA                                                 | NA                                     | rs3813946   | NA |
| chr1 | 2.1E+08  | 2.1E+08  | T      | -   | UTR5         | MIR205HG | NA                | NA                                                 | NA                                     | NA          | NA |
| chr1 | 2.28E+08 | 2.28E+08 | -      | A   | UTR5         | CDC42BPA | NA                | NA                                                 | NA                                     | NA          | NA |
| chr1 | 2.28E+08 | 2.28E+08 | -      | T   | UTR3         | IBA57    | NA                | NA                                                 | NA                                     | NA          | NA |
| chr1 | 2.29E+08 | 2.29E+08 | A      | G   | exonic       | OBSCN    | nonsynonymous SNV | 1R,OBSCN:NM_052843:exon50:c.A13142G:p.H4381R,OB    | NA                                     | rs1150912   | NA |
| chr1 | 2.32E+08 | 2.32E+08 | G      | A   | ncRNA_UTR3   | DISC1    | NA                | NA                                                 | NA                                     | rs821618    | NA |
| chr1 | 2.33E+08 | 2.33E+08 | G      | A   | exonic       | SIPA1L2  | nonsynonymous SNV | SIPA1L2:NM_020808:exon7:c.C2504T:p.A835V           | NA                                     | rs142752379 | P  |
| chr1 | 2.37E+08 | 2.37E+08 | G      | T   | UTR3         | MTR      | NA                | NA                                                 | NA                                     | NA          | NA |
| chr1 | 2.38E+08 | 2.38E+08 | T      | -   | UTR3         | RYR2     | NA                | NA                                                 | NA                                     | NA          | NA |
| chr1 | 2.4E+08  | 2.4E+08  | G      | A   | exonic       | FMN2     | synonymous SNV    | FMN2:NM_020066:exon5:c.G2820A:p.A940A              | NA                                     | rs145628188 | NA |
| chr1 | 2.4E+08  | 2.4E+08  | C      | T   | exonic       | FMN2     | nonsynonymous SNV | FMN2:NM_020066:exon5:c.C2828T:p.P943L              | NA                                     | rs199628038 | NA |
| chr1 | 2.41E+08 | 2.41E+08 | -      | T   | UTR3         | FMN2     | NA                | NA                                                 | NA                                     | rs139197792 | NA |
| chr1 | 2.45E+08 | 2.45E+08 | -      | GTA | UTR3         | C1orf101 | NA                | NA                                                 | NA                                     | rs201380603 | NA |
| chr1 | 2.49E+08 | 2.49E+08 | A      | G   | exonic       | OR2T3    | nonsynonymous SNV | OR2T3:NM_001005495:exon1:c.A829G:p.M277V           | NA                                     | rs74498773  | P  |
| chr2 | 5835698  | 5835698  | T      | -   | UTR3         | SOX11    | NA                | NA                                                 | NA                                     | rs67646557  | NA |
| chr2 | 5839842  | 5839842  | TTTTTT | -   | UTR3         | SOX11    | NA                | NA                                                 | NA                                     | NA          | NA |
| chr2 | 24253007 | 24253007 | -      | A   | UTR3         | C2orf44  | NA                | NA                                                 | NA                                     | NA          | NA |
| chr2 | 24991386 | 24991388 | AAA    | -   | UTR3         | NCOA1    | NA                | NA                                                 | NA                                     | NA          | NA |
| chr2 | 26680509 | 26680509 | A      | T   | UTR3         | OTOF     | NA                | NA                                                 | NA                                     | NA          | NA |
| chr2 | 27804802 | 27804802 | A      | G   | exonic       | C2orf16  | nonsynonymous SNV | C2orf16:NM_032266:exon1:c.A5363G:p.K1788R          | NA                                     | rs187723704 | NA |
| chr2 | 29023081 | 29023081 | C      | T   | UTR3         | PPP1CB   | NA                | NA                                                 | NA                                     | NA          | NA |
| chr2 | 29170759 | 29170759 | G      | A   | UTR3         | WDR43    | NA                | NA                                                 | NA                                     | rs13397658  | NA |
| chr2 | 29448423 | 29448423 | T      | G   | exonic       | ALK      | nonsynonymous SNV | ALK:NM_004304:exon19:c.A3076C:p.T1026P             | NA                                     | NA          | B  |
| chr2 | 30670215 | 30670215 | A      | C   | UTR5         | LCLAT1   | NA                | NA                                                 | NA                                     | NA          | NA |
| chr2 | 33787988 | 33787988 | A      | T   | UTR3         | RASGRP3  | NA                | NA                                                 | NA                                     | NA          | NA |

|      |          |          |          |    |              |            |                   |                                                     |                                 |             |    |
|------|----------|----------|----------|----|--------------|------------|-------------------|-----------------------------------------------------|---------------------------------|-------------|----|
| chr2 | 33787989 | 33787989 | C        | G  | UTR3         | RASGRP3    | NA                | NA                                                  | NA                              | NA          | NA |
| chr2 | 33787990 | 33787990 | T        | A  | UTR3         | RASGRP3    | NA                | NA                                                  | NA                              | NA          | NA |
| chr2 | 37479024 | 37479024 | A        | -  | UTR3         | PRKD3      | NA                | NA                                                  | NA                              | NA          | NA |
| chr2 | 45172485 | 45172485 | G        | A  | UTR3         | SIX3       | NA                | NA                                                  | NA                              | rs60528008  | NA |
| chr2 | 46707808 | 46707808 | C        | G  | exonic       | TMEM247    | nonsynonymous SNV | TMEM247:NM_001145051:exon2:c.C382G:p.Q128E          | NA                              | rs74318890  | NA |
| chr2 | 46852206 | 46852206 | G        | T  | UTR3         | CRIP1      | NA                | NA                                                  | NA                              | NA          | NA |
| chr2 | 48605828 | 48605828 | T        | -  | UTR3         | FOXN2      | NA                | NA                                                  | NA                              | NA          | NA |
| chr2 | 51259649 | 51259660 | AGAGAGAG | -  | UTR5         | NRXN1      | NA                | NA                                                  | NA                              | NA          | NA |
| chr2 | 55647020 | 55647020 | A        | C  | UTR5         | CCDC88A    | NA                | NA                                                  | NA                              | NA          | NA |
| chr2 | 55647025 | 55647025 | A        | C  | UTR5         | CCDC88A    | NA                | NA                                                  | NA                              | NA          | NA |
| chr2 | 71043885 | 71043885 | T        | G  | exonic       | CLEC4F     | nonsynonymous SNV | !58027:exon4:c.A628C:p.I210L,CLEC4F:NM_173535:exon4 | NA                              | NA          | P  |
| chr2 | 85284303 | 85284303 | A        | -  | UTR3         | KCMF1      | NA                | NA                                                  | NA                              | NA          | NA |
| chr2 | 85531118 | 85531118 | A        | C  | exonic       | TCF7L1     | synonymous SNV    | TCF7L1:NM_031283:exon6:c.A759C:p.P253P              | NA                              | NA          | NA |
| chr2 | 85549667 | 85549667 | G        | C  | UTR3         | TGOLN2     | NA                | NA                                                  | NA                              | NA          | NA |
| chr2 | 85554315 | 85554315 | A        | G  | exonic       | TGOLN2     | synonymous SNV    | 180N,TGOLN2:NM_001206844:exon2:c.T540C:p.N180N,T    | NA                              | NA          | NA |
| chr2 | 87002452 | 87002453 | TT       | -  | UTR3         | RMND5A     | NA                | NA                                                  | NA                              | NA          | NA |
| chr2 | 89082379 | 89082379 | G        | A  | ncRNA_exonic | ANKRD36BP2 | NA                | NA                                                  | NA                              | rs143191250 | NA |
| chr2 | 92129614 | 92129614 | G        | T  | ncRNA_exonic | ACTR3BP2   | NA                | NA                                                  | NA                              | NA          | NA |
| chr2 | 97779341 | 97779341 | T        | G  | UTR5         | ANKRD36    | NA                | NA                                                  | NA                              | rs3866777   | NA |
| chr2 | 98128228 | 98128228 | G        | A  | exonic       | ANKRD36B   | synonymous SNV    | ANKRD36B:NM_025190:exon39:c.C3093T:p.S1031S         | ID=COSN395741;OCCURENCE=1(lung) | rs201190268 | NA |
| chr2 | 98129733 | 98129733 | A        | C  | exonic       | ANKRD36B   | stopgain SNV      | ANKRD36B:NM_025190:exon38:c.T2715G:p.Y905X          | NA                              | rs145533718 | NA |
| chr2 | 98356250 | 98356250 | G        | C  | UTR3         | ZAP70      | NA                | NA                                                  | NA                              | rs2278699   | NA |
| chr2 | 1.02E+08 | 1.02E+08 | A        | G  | UTR5         | RFX8       | NA                | NA                                                  | NA                              | rs62154334  | NA |
| chr2 | 1.03E+08 | 1.03E+08 | G        | A  | UTR3         | MAP4K4     | NA                | NA                                                  | NA                              | NA          | NA |
| chr2 | 1.07E+08 | 1.07E+08 | AAC      | -  | UTR3         | ST6GAL2    | NA                | NA                                                  | NA                              | rs140467729 | NA |
| chr2 | 1.07E+08 | 1.07E+08 | G        | A  | UTR3         | ST6GAL2    | NA                | NA                                                  | NA                              | NA          | NA |
| chr2 | 1.13E+08 | 1.13E+08 | G        | T  | UTR3         | ZC3H6      | NA                | NA                                                  | NA                              | NA          | NA |
| chr2 | 1.19E+08 | 1.19E+08 | A        | -  | UTR3         | CCDC93     | NA                | NA                                                  | NA                              | NA          | NA |
| chr2 | 1.2E+08  | 1.2E+08  | T        | G  | UTR5         | EN1        | NA                | NA                                                  | NA                              | NA          | NA |
| chr2 | 1.31E+08 | 1.31E+08 | -        | CT | ncRNA_exonic | LOC440905  | NA                | NA                                                  | NA                              | rs3058424   | NA |
| chr2 | 1.33E+08 | 1.33E+08 | G        | C  | ncRNA_exonic | ANKRD30BL  | NA                | NA                                                  | NA                              | rs112494139 | NA |
| chr2 | 1.33E+08 | 1.33E+08 | G        | A  | ncRNA_exonic | ANKRD30BL  | NA                | NA                                                  | NA                              | rs141716220 | NA |
| chr2 | 1.33E+08 | 1.33E+08 | G        | A  | ncRNA_exonic | ANKRD30BL  | NA                | NA                                                  | NA                              | rs148180857 | NA |
| chr2 | 1.52E+08 | 1.52E+08 | T        | C  | exonic       | NEB        | nonsynonymous SNV | 2D,NEB:NM_001164508:exon95:c.A14734G:p.N4912D,NE    | NA                              | rs10909569  | NA |
| chr2 | 1.53E+08 | 1.53E+08 | T        | -  | UTR3         | ARL5A      | NA                | NA                                                  | NA                              | NA          | NA |
| chr2 | 1.53E+08 | 1.53E+08 | C        | T  | UTR3         | CACNB4     | NA                | NA                                                  | NA                              | rs7597215   | NA |
| chr2 | 1.7E+08  | 1.7E+08  | -        | A  | UTR3         | LRP2       | NA                | NA                                                  | NA                              | NA          | NA |
| chr2 | 1.74E+08 | 1.74E+08 | -        | A  | ncRNA_UTR3   | ZAK        | NA                | NA                                                  | NA                              | NA          | NA |
| chr2 | 1.77E+08 | 1.77E+08 | C        | T  | UTR3         | HOXD9      | NA                | NA                                                  | NA                              | NA          | NA |
| chr2 | 2.02E+08 | 2.02E+08 | TT       | -  | UTR3         | FAM126B    | NA                | NA                                                  | NA                              | NA          | NA |
| chr2 | 2.04E+08 | 2.04E+08 | C        | T  | UTR3         | FAM117B    | NA                | NA                                                  | NA                              | NA          | NA |
| chr2 | 2.09E+08 | 2.09E+08 | AG       | -  | UTR3         | FZD5       | NA                | NA                                                  | NA                              | rs201847302 | NA |
| chr2 | 2.12E+08 | 2.12E+08 | A        | -  | UTR3         | ERBB4      | NA                | NA                                                  | NA                              | NA          | NA |
| chr2 | 2.17E+08 | 2.17E+08 | C        | A  | UTR3         | MREG       | NA                | NA                                                  | NA                              | NA          | NA |
| chr2 | 2.2E+08  | 2.2E+08  | G        | T  | UTR3         | FAM134A    | NA                | NA                                                  | NA                              | NA          | NA |
| chr2 | 2.25E+08 | 2.25E+08 | C        | A  | UTR3         | WDFY1      | NA                | NA                                                  | NA                              | NA          | NA |
| chr2 | 2.33E+08 | 2.33E+08 | T        | C  | UTR3         | DIS3L2     | NA                | NA                                                  | NA                              | NA          | NA |
| chr2 | 2.33E+08 | 2.33E+08 | T        | -  | UTR3         | CHRNA      | NA                | NA                                                  | NA                              | NA          | NA |
| chr2 | 2.35E+08 | 2.35E+08 | A        | C  | UTR3         | HJURP      | NA                | NA                                                  | NA                              | rs74270439  | NA |
| chr2 | 2.41E+08 | 2.41E+08 | A        | G  | exonic       | PRR21      | synonymous SNV    | PRR21:NM_001080835:exon1:c.T237C:p.H79H             | NA                              | rs117846189 | NA |
| chr3 | 3214495  | 3214495  | C        | A  | exonic       | CRBN       | nonsynonymous SNV | 73482:exon4:c.G489T:p.R163S,CRBN:NM_016302:exon4:c  | NA                              | NA          | D  |
| chr3 | 11599950 | 11599950 | T        | -  | UTR3         | VGLL4      | NA                | NA                                                  | NA                              | NA          | NA |
| chr3 | 14105938 | 14105938 | T        | A  | ncRNA_exonic | TPRX1      | NA                | NA                                                  | NA                              | NA          | NA |
| chr3 | 14105996 | 14105996 | A        | G  | ncRNA_exonic | TPRX1      | NA                | NA                                                  | NA                              | NA          | NA |
| chr3 | 14106174 | 14106174 | T        | C  | ncRNA_exonic | TPRX1      | NA                | NA                                                  | NA                              | NA          | NA |
| chr3 | 28364846 | 28364846 | T        | -  | UTR3         | AZI2       | NA                | NA                                                  | NA                              | rs200293551 | NA |
| chr3 | 41281477 | 41281477 | C        | T  | UTR3         | CTNNA1     | NA                | NA                                                  | NA                              | rs201175238 | NA |
| chr3 | 47050999 | 47050999 | G        | C  | UTR3         | NBEAL2     | NA                | NA                                                  | NA                              | NA          | NA |
| chr3 | 49044650 | 49044650 | A        | G  | UTR5         | WDR6       | NA                | NA                                                  | NA                              | NA          | NA |
| chr3 | 49572947 | 49572947 | C        | A  | UTR3         | DAG1       | NA                | NA                                                  | NA                              | NA          | NA |
| chr3 | 49694888 | 49694888 | T        | C  | exonic       | BSN        | synonymous SNV    | BSN:NM_003458:exon5:c.T7899C:p.L2633L               | NA                              | NA          | NA |
| chr3 | 55502167 | 55502167 | A        | -  | UTR3         | WNT5A      | NA                | NA                                                  | NA                              | NA          | NA |

|      |          |          |        |         |              |          |                   |                                                   |                                   |             |    |
|------|----------|----------|--------|---------|--------------|----------|-------------------|---------------------------------------------------|-----------------------------------|-------------|----|
| chr3 | 63988881 | 63988881 | C      | T       | UTR3         | ATXN7    | NA                | NA                                                | NA                                | NA          | NA |
| chr3 | 64672461 | 64672461 | T      | G       | exonic       | ADAMTS9  | nonsynonymous SNV | ADAMTS9:NM_182920:exon2:c.A299C:p.Y100S           | NA                                | NA          | D  |
| chr3 | 67049615 | 67049615 | G      | T       | exonic       | KBTD8    | nonsynonymous SNV | KBTD8:NM_032505:exon2:c.G227T:p.R76I              | NA                                | NA          | D  |
| chr3 | 71821711 | 71821711 | A      | -       | UTR3         | PROK2    | NA                | NA                                                | NA                                | rs71713597  | NA |
| chr3 | 75716090 | 75716090 | T      | C       | ncRNA_exonic | FLJ20518 | NA                | NA                                                | NA                                | rs144150259 | NA |
| chr3 | 75787116 | 75787116 | T      | G       | exonic       | ZNF717   | nonsynonymous SNV | ZNF717:NM_001128223:exon5:c.A1658C:p.H553P        | NA                                | rs142824987 | NA |
| chr3 | 75787620 | 75787620 | T      | C       | exonic       | ZNF717   | nonsynonymous SNV | ZNF717:NM_001128223:exon5:c.A1154G:p.H385R        | NA                                | rs145606249 | NA |
| chr3 | 75790852 | 75790852 | G      | A       | exonic       | ZNF717   | synonymous SNV    | ZNF717:NM_001128223:exon3:c.C93T:p.F31F           | NA                                | rs201689840 | NA |
| chr3 | 98515881 | 98515882 | AA     | -       | UTR3         | DCBLD2   | NA                | NA                                                | NA                                | rs56369137  | NA |
| chr3 | 1.05E+08 | 1.05E+08 | G      | T       | exonic       | CBLB     | nonsynonymous SNV | CBLB:NM_170662:exon12:c.C1618A:p.Q540K            | NA                                | NA          | D  |
| chr3 | 1.2E+08  | 1.2E+08  | -      | A       | UTR3         | GSK3B    | NA                | NA                                                | NA                                | NA          | NA |
| chr3 | 1.2E+08  | 1.2E+08  | A      | C       | exonic       | GPR156   | nonsynonymous SNV | 1271:exon9:c.T1610G:p.V537G,GPR156:NM_153002:exon | NA                                | NA          | D  |
| chr3 | 1.21E+08 | 1.21E+08 | T      | -       | UTR3         | GTF2E1   | NA                | NA                                                | NA                                | rs71133517  | NA |
| chr3 | 1.23E+08 | 1.23E+08 | T      | -       | ncRNA_UTR3   | MYLK     | NA                | NA                                                | NA                                | rs35930843  | NA |
| chr3 | 1.26E+08 | 1.26E+08 | -      | T       | UTR3         | ZXDC     | NA                | NA                                                | NA                                | NA          | NA |
| chr3 | 1.29E+08 | 1.29E+08 | T      | G       | exonic       | PLXND1   | nonsynonymous SNV | PLXND1:NM_015103:exon31:c.A5108C:p.Y1703S         | NA                                | NA          | D  |
| chr3 | 1.34E+08 | 1.34E+08 | C      | G       | UTR5         | CEP63    | NA                | NA                                                | NA                                | NA          | NA |
| chr3 | 1.41E+08 | 1.41E+08 | -      | T       | UTR3         | RNF7     | NA                | NA                                                | NA                                | NA          | NA |
| chr3 | 1.42E+08 | 1.42E+08 | C      | T       | UTR3         | GK5      | NA                | NA                                                | NA                                | NA          | NA |
| chr3 | 1.5E+08  | 1.5E+08  | G      | T       | UTR3         | TSC22D2  | NA                | NA                                                | NA                                | rs201497156 | NA |
| chr3 | 1.52E+08 | 1.52E+08 | T      | -       | UTR3         | MBNL1    | NA                | NA                                                | NA                                | rs142162205 | NA |
| chr3 | 1.7E+08  | 1.7E+08  | G      | T       | UTR3         | CLDN11   | NA                | NA                                                | NA                                | NA          | NA |
| chr3 | 1.7E+08  | 1.7E+08  | C      | T       | UTR3         | CLDN11   | NA                | NA                                                | NA                                | NA          | NA |
| chr3 | 1.84E+08 | 1.84E+08 | GTGTGT | -       | UTR3         | EPHB3    | NA                | NA                                                | NA                                | rs35514470  | NA |
| chr3 | 1.95E+08 | 1.95E+08 | T      | C       | ncRNA_exonic | SDHAP2   | NA                | NA                                                | ID=COSN404759;OCCURENCE=1(lung)   | rs6583273   | NA |
| chr3 | 1.96E+08 | 1.96E+08 | T      | C       | exonic       | MUC4     | nonsynonymous SNV | MUC4:NM_018406:exon2:c.A12568G:p.T4190A           | NA                                | rs200813870 | NA |
| chr3 | 1.96E+08 | 1.96E+08 | A      | G       | exonic       | MUC4     | synonymous SNV    | MUC4:NM_018406:exon2:c.T12159C:p.N4053N           | NA                                | rs201191776 | NA |
| chr3 | 1.96E+08 | 1.96E+08 | T      | C       | exonic       | MUC4     | nonsynonymous SNV | MUC4:NM_018406:exon2:c.A12136G:p.T4046A           | ID=COSM479895;OCCURENCE=2(kidney) | rs62282465  | NA |
| chr3 | 1.96E+08 | 1.96E+08 | T      | A       | exonic       | MUC4     | synonymous SNV    | MUC4:NM_018406:exon2:c.A11796T:p.G3932G           | NA                                | rs200897653 | NA |
| chr3 | 1.96E+08 | 1.96E+08 | A      | G       | exonic       | MUC4     | synonymous SNV    | MUC4:NM_018406:exon2:c.T11580C:p.T3860T           | NA                                | NA          | NA |
| chr3 | 1.96E+08 | 1.96E+08 | A      | G       | exonic       | MUC4     | nonsynonymous SNV | MUC4:NM_018406:exon2:c.T11162C:p.V3721A           | NA                                | NA          | NA |
| chr3 | 1.96E+08 | 1.96E+08 | G      | A       | exonic       | MUC4     | nonsynonymous SNV | MUC4:NM_018406:exon2:c.C11018T:p.A3673V           | NA                                | rs202062831 | NA |
| chr3 | 1.96E+08 | 1.96E+08 | C      | G       | exonic       | MUC4     | nonsynonymous SNV | MUC4:NM_018406:exon2:c.G10405C:p.D3469H           | NA                                | rs76458038  | NA |
| chr3 | 1.96E+08 | 1.96E+08 | C      | G       | exonic       | MUC4     | synonymous SNV    | MUC4:NM_018406:exon2:c.G8733C:p.T2911T            | NA                                | rs28385894  | NA |
| chr3 | 1.96E+08 | 1.96E+08 | A      | G       | exonic       | MUC4     | nonsynonymous SNV | MUC4:NM_018406:exon2:c.T8570C:p.V2857A            | NA                                | NA          | NA |
| chr3 | 1.96E+08 | 1.96E+08 | C      | T       | exonic       | MUC4     | nonsynonymous SNV | MUC4:NM_018406:exon2:c.G8464A:p.A2822T            | NA                                | rs28420515  | NA |
| chr3 | 1.96E+08 | 1.96E+08 | G      | A       | exonic       | MUC4     | nonsynonymous SNV | MUC4:NM_018406:exon2:c.C8282T:p.A2761V            | NA                                | rs201935809 | NA |
| chr3 | 1.96E+08 | 1.96E+08 | A      | G       | exonic       | MUC4     | nonsynonymous SNV | MUC4:NM_018406:exon2:c.T7445C:p.L2482P            | NA                                | NA          | NA |
| chr3 | 1.96E+08 | 1.96E+08 | A      | G       | exonic       | MUC4     | nonsynonymous SNV | MUC4:NM_018406:exon2:c.T7418C:p.V2473A            | NA                                | rs200807157 | NA |
| chr3 | 1.96E+08 | 1.96E+08 | C      | T       | exonic       | MUC4     | synonymous SNV    | MUC4:NM_018406:exon2:c.G7320A:p.S2440S            | NA                                | rs71321826  | NA |
| chr3 | 1.96E+08 | 1.96E+08 | A      | G       | exonic       | MUC4     | nonsynonymous SNV | MUC4:NM_018406:exon2:c.T6293C:p.L2098P            | NA                                | rs141952317 | NA |
| chr3 | 1.96E+08 | 1.96E+08 | A      | T       | exonic       | MUC4     | synonymous SNV    | MUC4:NM_018406:exon2:c.T6081A:p.T2027T            | NA                                | NA          | NA |
| chr3 | 1.96E+08 | 1.96E+08 | A      | G       | exonic       | MUC4     | synonymous SNV    | MUC4:NM_018406:exon2:c.T5550C:p.S1850S            | NA                                | NA          | NA |
| chr3 | 1.96E+08 | 1.96E+08 | C      | T       | exonic       | MUC4     | synonymous SNV    | MUC4:NM_018406:exon2:c.G5400A:p.S1800S            | NA                                | NA          | NA |
| chr3 | 1.96E+08 | 1.96E+08 | C      | G       | exonic       | MUC4     | nonsynonymous SNV | MUC4:NM_018406:exon2:c.G4885C:p.D1629H            | NA                                | rs78438024  | NA |
| chr3 | 1.96E+08 | 1.96E+08 | C      | G       | exonic       | MUC4     | nonsynonymous SNV | MUC4:NM_018406:exon2:c.G4789C:p.D1597H            | NA                                | NA          | NA |
| chr3 | 1.96E+08 | 1.96E+08 | C      | G       | exonic       | MUC4     | synonymous SNV    | MUC4:NM_018406:exon2:c.G4461C:p.T1487T            | NA                                | rs12489814  | NA |
| chr3 | 1.96E+08 | 1.96E+08 | C      | T       | exonic       | MUC4     | nonsynonymous SNV | MUC4:NM_018406:exon2:c.G4216A:p.A1406T            | NA                                | NA          | NA |
| chr3 | 1.96E+08 | 1.96E+08 | A      | G       | exonic       | MUC4     | synonymous SNV    | MUC4:NM_018406:exon2:c.T3885C:p.T1295T            | NA                                | NA          | NA |
| chr3 | 1.96E+08 | 1.96E+08 | A      | G       | exonic       | MUC4     | synonymous SNV    | MUC4:NM_018406:exon2:c.T3471C:p.D1157D            | NA                                | NA          | NA |
| chr3 | 1.96E+08 | 1.96E+08 | A      | G       | exonic       | MUC4     | synonymous SNV    | MUC4:NM_018406:exon2:c.T3468C:p.T1156T            | NA                                | NA          | NA |
| chr3 | 1.96E+08 | 1.96E+08 | A      | G       | exonic       | MUC4     | synonymous SNV    | MUC4:NM_018406:exon2:c.T3276C:p.T1092T            | NA                                | rs112260425 | NA |
| chr3 | 1.96E+08 | 1.96E+08 | C      | T       | exonic       | MUC4     | nonsynonymous SNV | MUC4:NM_018406:exon2:c.G3085A:p.D1029N            | NA                                | rs201613765 | NA |
| chr3 | 1.96E+08 | 1.96E+08 | T      | C       | ncRNA_exonic | SDHAP1   | NA                | NA                                                | NA                                | rs189732960 | NA |
| chr3 | 1.96E+08 | 1.96E+08 | A      | G       | ncRNA_exonic | SDHAP1   | NA                | NA                                                | NA                                | rs199975852 | NA |
| chr3 | 1.96E+08 | 1.96E+08 | A      | G       | ncRNA_exonic | SDHAP1   | NA                | NA                                                | NA                                | rs200738162 | NA |
| chr3 | 1.96E+08 | 1.96E+08 | T      | C       | UTR3         | FBXO45   | NA                | NA                                                | NA                                | rs9834490   | NA |
| chr3 | 1.96E+08 | 1.96E+08 | T      | -       | UTR3         | CEP19    | NA                | NA                                                | NA                                | rs71161952  | NA |
| chr3 | 1.97E+08 | 1.97E+08 | -      | TTTTTTT | UTR3         | SENPS5   | NA                | NA                                                | NA                                | NA          | NA |
| chr3 | 1.98E+08 | 1.98E+08 | A      | C       | exonic       | FAM157A  | synonymous SNV    | FAM157A:NM_001145248:exon5:c.A927C:p.R309R        | NA                                | rs202207735 | NA |
| chr4 | 87567    | 87567    | G      | T       | UTR3         | ZNF595   | NA                | NA                                                | NA                                | NA          | NA |
| chr4 | 87570    | 87570    | C      | T       | UTR3         | ZNF595   | NA                | NA                                                | NA                                | NA          | NA |



|      |          |          |          |      |                |           |                   |                                                    |                                      |             |    |
|------|----------|----------|----------|------|----------------|-----------|-------------------|----------------------------------------------------|--------------------------------------|-------------|----|
| chr4 | 87574    | 87574    | G        | T    | UTR3           | ZNF595    | NA                | NA                                                 | NA                                   | NA          | NA |
| chr4 | 87604    | 87604    | -        | T    | UTR3           | ZNF595    | NA                | NA                                                 | NA                                   | NA          | NA |
| chr4 | 1020221  | 1020221  | T        | C    | UTR3           | FGFRL1    | NA                | NA                                                 | NA                                   | NA          | NA |
| chr4 | 1388662  | 1388662  | G        | C    | exonic         | CRIPAK    | synonymous SNV    | CRIPAK:NM_175918:exon1:c.G363C:p.P121P             | NA                                   | rs9762106   | NA |
| chr4 | 1388755  | 1388755  | C        | G    | exonic         | CRIPAK    | synonymous SNV    | CRIPAK:NM_175918:exon1:c.C456G:p.P152P             | NA                                   | rs141481663 | NA |
| chr4 | 1388757  | 1388757  | T        | C    | exonic         | CRIPAK    | nonsynonymous SNV | CRIPAK:NM_175918:exon1:c.T458C:p.M153T             | ID=COSM225540;OCCURENCE=1(NS)        | rs138170890 | P  |
| chr4 | 1388848  | 1388848  | A        | C    | exonic         | CRIPAK    | synonymous SNV    | CRIPAK:NM_175918:exon1:c.A549C:p.P183P             | NA                                   | rs74511366  | NA |
| chr4 | 1389059  | 1389059  | T        | C    | exonic         | CRIPAK    | nonsynonymous SNV | CRIPAK:NM_175918:exon1:c.T760C:p.C254R             | NA                                   | NA          | D  |
| chr4 | 1389070  | 1389070  | A        | G    | exonic         | CRIPAK    | synonymous SNV    | CRIPAK:NM_175918:exon1:c.A771G:p.G257G             | NA                                   | rs151096093 | NA |
| chr4 | 2087366  | 2087366  | G        | T    | exonic         | POLN      | nonsynonymous SNV | POLN:NM_181808:exon19:c.C2171A:p.A724E             | NA                                   | NA          | B  |
| chr4 | 22439886 | 22439886 | C        | A    | exonic         | GPR125    | nonsynonymous SNV | GPR125:NM_145290:exon8:c.G1078T:p.D360Y            | NA                                   | NA          | D  |
| chr4 | 25280824 | 25280824 | C        | T    | UTR3           | PI4K2B    | NA                | NA                                                 | NA                                   | NA          | NA |
| chr4 | 25749200 | 25749201 | AC       | -    | UTR3           | SEL1L3    | NA                | NA                                                 | NA                                   | rs147448161 | NA |
| chr4 | 37614259 | 37614260 | AA       | -    | UTR3           | RELL1     | NA                | NA                                                 | NA                                   | NA          | NA |
| chr4 | 41747030 | 41747030 | T        | G    | UTR3           | PHOX2B    | NA                | NA                                                 | NA                                   | NA          | NA |
| chr4 | 41747047 | 41747047 | T        | G    | UTR3           | PHOX2B    | NA                | NA                                                 | NA                                   | NA          | NA |
| chr4 | 71521932 | 71521932 | A        | -    | UTR3           | IGJ       | NA                | NA                                                 | NA                                   | NA          | NA |
| chr4 | 76555253 | 76555253 | G        | A    | UTR5           | CDKL2     | NA                | NA                                                 | NA                                   | NA          | NA |
| chr4 | 81974755 | 81974755 | -        | T    | UTR3           | BMP3      | NA                | NA                                                 | NA                                   | NA          | NA |
| chr4 | 82088324 | 82088324 | G        | A    | exonic         | PRKG2     | synonymous SNV    | PRKG2:NM_006259:exon5:c.C903T:p.C301C              | NA                                   | NA          | NA |
| chr4 | 84011680 | 84011680 | -        | A    | UTR3           | PLAC8     | NA                | NA                                                 | NA                                   | NA          | NA |
| chr4 | 88536471 | 88536471 | A        | G    | exonic         | DSPP      | nonsynonymous SNV | DSPP:NM_014208:exon5:c.A2657G:p.N886S              | NA                                   | NA          | NA |
| chr4 | 88537513 | 88537513 | A        | C    | exonic         | DSPP      | nonsynonymous SNV | DSPP:NM_014208:exon5:c.A3699C:p.E1233D             | NA                                   | rs112275895 | NA |
| chr4 | 90646502 | 90646505 | AGAG     | -    | UTR3           | SNCA      | NA                | NA                                                 | NA                                   | rs141457381 | NA |
| chr4 | 90757919 | 90757919 | T        | C    | ncRNA_UTR5     | SNCA      | NA                | NA                                                 | NA                                   | NA          | NA |
| chr4 | 94750481 | 94750481 | T        | G    | exonic         | ATOH1     | nonsynonymous SNV | ATOH1:NM_005172:exon1:c.T404G:p.V135G              | NA                                   | NA          | B  |
| chr4 | 96076626 | 96076626 | -        | TT   | UTR3           | BMPR1B    | NA                | NA                                                 | NA                                   | NA          | NA |
| chr4 | 1.04E+08 | 1.04E+08 | A        | T    | UTR3           | NFKB1     | NA                | NA                                                 | NA                                   | NA          | NA |
| chr4 | 1.09E+08 | 1.09E+08 | GTGT     | -    | ncRNA_exonic   | RPL34-AS1 | NA                | NA                                                 | NA                                   | rs150491091 | NA |
| chr4 | 1.29E+08 | 1.29E+08 | T        | C    | UTR3           | MFSD8     | NA                | NA                                                 | NA                                   | NA          | NA |
| chr4 | 1.39E+08 | 1.39E+08 | G        | T    | ncRNA_UTR3     | SLC7A11   | NA                | NA                                                 | NA                                   | NA          | NA |
| chr4 | 1.4E+08  | 1.4E+08  | C        | T    | UTR3           | CCRN4L    | NA                | NA                                                 | NA                                   | NA          | NA |
| chr4 | 1.4E+08  | 1.4E+08  | A        | T    | UTR3           | CCRN4L    | NA                | NA                                                 | NA                                   | rs74826922  | NA |
| chr4 | 1.4E+08  | 1.4E+08  | T        | -    | UTR3           | NAA15     | NA                | NA                                                 | NA                                   | rs72425271  | NA |
| chr4 | 1.46E+08 | 1.46E+08 | A        | G    | UTR3           | OTUD4     | NA                | NA                                                 | NA                                   | NA          | NA |
| chr4 | 1.58E+08 | 1.58E+08 | A        | G    | UTR5           | GRIA2     | NA                | NA                                                 | NA                                   | NA          | NA |
| chr4 | 1.6E+08  | 1.6E+08  | AA       | -    | UTR3           | FNIP2     | NA                | NA                                                 | NA                                   | NA          | NA |
| chr5 | 661502   | 661502   | A        | C    | UTR3           | TPPP      | NA                | NA                                                 | NA                                   | NA          | NA |
| chr5 | 663244   | 663244   | T        | G    | UTR3           | TPPP      | NA                | NA                                                 | NA                                   | NA          | NA |
| chr5 | 10279657 | 10279657 | T        | -    | UTR3           | CMBL      | NA                | NA                                                 | NA                                   | NA          | NA |
| chr5 | 16465810 | 16465810 | A        | C    | UTR5           | ZNF622    | NA                | NA                                                 | NA                                   | NA          | NA |
| chr5 | 16465854 | 16465854 | A        | C    | UTR5           | ZNF622    | NA                | NA                                                 | NA                                   | NA          | NA |
| chr5 | 23521146 | 23521146 | G        | T    | exonic         | PRDM9     | synonymous SNV    | PRDM9:NM_020227:exon6:c.G366T:p.A122A              | NA                                   | NA          | NA |
| chr5 | 35909976 | 35909976 | C        | A    | exonic         | CAPSL     | nonsynonymous SNV | !2625:exon4:c.G517T:p.D173Y,CAPSL:NM_144647:exon4: | NA                                   | NA          | D  |
| chr5 | 55168106 | 55168106 | G        | T    | exonic         | IL31RA    | nonsynonymous SNV | !42637:exon4:c.G281T:p.G94V,IL31RA:NM_139017:exon4 | NA                                   | NA          | B  |
| chr5 | 71503811 | 71503811 | G        | T    | UTR3           | MAP1B     | NA                | NA                                                 | NA                                   | NA          | NA |
| chr5 | 78324457 | 78324457 | C        | A    | exonic         | DMGDH     | nonsynonymous SNV | DMGDH:NM_013391:exon12:c.G1831T:p.A611S            | NA                                   | NA          | B  |
| chr5 | 80738520 | 80738520 | G        | T    | exonic         | SSBP2     | nonsynonymous SNV | i735:exon12:c.C711A:p.N237K,SSBP2:NM_001256736:exc | NA                                   | NA          | D  |
| chr5 | 90666826 | 90666826 | A        | -    | UTR3           | ARRDC3    | NA                | NA                                                 | NA                                   | NA          | NA |
| chr5 | 92905599 | 92905599 | C        | A    | ncRNA_exonic   | FLJ42709  | NA                | NA                                                 | NA                                   | NA          | NA |
| chr5 | 1.02E+08 | 1.02E+08 | GT       | -    | UTR3           | SLCO4C1   | NA                | NA                                                 | NA                                   | NA          | NA |
| chr5 | 1.15E+08 | 1.15E+08 | A        | C    | UTR3           | ATG12     | NA                | NA                                                 | NA                                   | rs35903246  | NA |
| chr5 | 1.15E+08 | 1.15E+08 | -        | AGGC | UTR5           | AP3S1     | NA                | NA                                                 | NA                                   | rs144226661 | NA |
| chr5 | 1.15E+08 | 1.15E+08 | C        | T    | exonic         | AQPEP     | synonymous SNV    | AQPEP:NM_173800:exon1:c.C64T:p.L22L                | ID=COSM1130961;OCCURENCE=1(prostate) | rs10062297  | NA |
| chr5 | 1.22E+08 | 1.22E+08 | CACACACA | -    | UTR3           | SNX2      | NA                | NA                                                 | NA                                   | rs71851865  | NA |
| chr5 | 1.23E+08 | 1.23E+08 | G        | A    | exonic         | CEP120    | synonymous SNV    | 226:exon10:c.C1368T:p.F456F,CEP120:NM_153223:exon: | NA                                   | NA          | NA |
| chr5 | 1.28E+08 | 1.28E+08 | A        | -    | UTR3           | FBN2      | NA                | NA                                                 | NA                                   | NA          | NA |
| chr5 | 1.32E+08 | 1.32E+08 | T        | G    | ncRNA_intronic | C5orf56   | NA                | NA                                                 | NA                                   | NA          | NA |
| chr5 | 1.34E+08 | 1.34E+08 | G        | C    | exonic         | PHF15     | nonsynonymous SNV | PHF15:NM_015288:exon11:c.G2015C:p.S672T            | NA                                   | NA          | D  |
| chr5 | 1.34E+08 | 1.34E+08 | C        | A    | UTR3           | DDX46     | NA                | NA                                                 | NA                                   | NA          | NA |
| chr5 | 1.37E+08 | 1.37E+08 | A        | C    | UTR3           | HNRNPA0   | NA                | NA                                                 | NA                                   | NA          | NA |
| chr5 | 1.37E+08 | 1.37E+08 | T        | C    | UTR3           | HNRNPA0   | NA                | NA                                                 | NA                                   | NA          | NA |



|      |          |          |           |        |                |          |                   |                                                   |                                                  |             |    |
|------|----------|----------|-----------|--------|----------------|----------|-------------------|---------------------------------------------------|--------------------------------------------------|-------------|----|
| chr5 | 1.37E+08 | 1.37E+08 | G         | C      | exonic         | HNRNPA0  | synonymous SNV    | HNRNPA0:NM_006805:exon1:c.C897G:p.G299G           | NA                                               | NA          | NA |
| chr5 | 1.37E+08 | 1.37E+08 | A         | C      | exonic         | HNRNPA0  | synonymous SNV    | HNRNPA0:NM_006805:exon1:c.T888G:p.G296G           | NA                                               | NA          | NA |
| chr5 | 1.41E+08 | 1.41E+08 | G         | T      | UTR3           | PCDHB9   | NA                | NA                                                | NA                                               | NA          | NA |
| chr5 | 1.49E+08 | 1.49E+08 | C         | G      | ncRNA_exonic   | MIR143HG | NA                | NA                                                | NA                                               | rs519814    | NA |
| chr5 | 1.49E+08 | 1.49E+08 | -         | T      | ncRNA_exonic   | MIR143HG | NA                | NA                                                | NA                                               | NA          | NA |
| chr5 | 1.49E+08 | 1.49E+08 | C         | T      | UTR3           | PDE6A    | NA                | NA                                                | NA                                               | rs72660270  | NA |
| chr5 | 1.51E+08 | 1.51E+08 | -         | A      | UTR3           | SLC36A2  | NA                | NA                                                | NA                                               | rs33912867  | NA |
| chr5 | 1.52E+08 | 1.52E+08 | -         | A      | UTR3           | NMUR2    | NA                | NA                                                | NA                                               | NA          | NA |
| chr5 | 1.57E+08 | 1.57E+08 | -         | A      | UTR3           | CYFIP2   | NA                | NA                                                | NA                                               | NA          | NA |
| chr5 | 1.58E+08 | 1.58E+08 | -         | A      | UTR3           | EBF1     | NA                | NA                                                | NA                                               | NA          | NA |
| chr5 | 1.58E+08 | 1.58E+08 | C         | A      | UTR3           | EBF1     | NA                | NA                                                | NA                                               | rs112280787 | NA |
| chr5 | 1.61E+08 | 1.61E+08 | -         | T      | UTR3           | GABRB2   | NA                | NA                                                | NA                                               | NA          | NA |
| chr5 | 1.72E+08 | 1.72E+08 | -         | A      | UTR3           | NEURL1B  | NA                | NA                                                | NA                                               | rs5873335   | NA |
| chr5 | 1.73E+08 | 1.73E+08 | A         | G      | exonic         | BOD1     | synonymous SNV    | BOD1:NM_138369:exon3:c.T543C:p.S181S              | ID=COSM311048;OCCURENCE=1(lung)                  | rs77014290  | NA |
| chr5 | 1.75E+08 | 1.75E+08 | A         | C      | UTR5           | HRH2     | NA                | NA                                                | NA                                               | NA          | NA |
| chr5 | 1.76E+08 | 1.76E+08 | A         | G      | UTR3           | EIF4E1B  | NA                | NA                                                | NA                                               | NA          | NA |
| chr5 | 1.76E+08 | 1.76E+08 | T         | G      | UTR3           | EIF4E1B  | NA                | NA                                                | NA                                               | NA          | NA |
| chr6 | 407629   | 407629   | -         | T      | UTR3           | IRF4     | NA                | NA                                                | NA                                               | NA          | NA |
| chr6 | 7249296  | 7249299  | GAGA      | -      | UTR3           | RREB1    | NA                | NA                                                | NA                                               | rs66585613  | NA |
| chr6 | 10796303 | 10796303 | T         | G      | exonic         | MAK      | nonsynonymous SNV | 357H,MAK:NM_001242957:exon9:c.A1071C:p.Q357H,M    | NA                                               | NA          | P  |
| chr6 | 18129306 | 18129306 | C         | A      | UTR3           | TPMT     | NA                | NA                                                | NA                                               | NA          | NA |
| chr6 | 21597697 | 21597697 | C         | T      | UTR3           | SOX4     | NA                | NA                                                | NA                                               | NA          | NA |
| chr6 | 24775181 | 24775181 | G         | T      | UTR5           | GMNN     | NA                | NA                                                | NA                                               | rs2754775   | NA |
| chr6 | 25769247 | 25769247 | C         | A      | exonic         | SLC17A4  | synonymous SNV    | SLC17A4:NM_005495:exon3:c.C126A:p.I42I            | NA                                               | NA          | NA |
| chr6 | 29857177 | 29857177 | G         | A      | ncRNA_exonic   | HLA-H    | NA                | NA                                                | NA                                               | rs1059578   | NA |
| chr6 | 29892568 | 29892568 | C         | A      | ncRNA_exonic   | HCG4B    | NA                | NA                                                | NA                                               | NA          | NA |
| chr6 | 29892570 | 29892570 | A         | T      | ncRNA_exonic   | HCG4B    | NA                | NA                                                | NA                                               | NA          | NA |
| chr6 | 30573785 | 30573785 | A         | G      | exonic         | PPP1R10  | synonymous SNV    | PPP1R10:NM_002714:exon10:c.T768C:p.T256T          | NA                                               | NA          | NA |
| chr6 | 30673064 | 30673064 | C         | T      | exonic         | MDC1     | nonsynonymous SNV | MDC1:NM_014641:exon10:c.G3896A:p.R1299Q           | NA                                               | rs144657716 | NA |
| chr6 | 30673432 | 30673432 | C         | T      | exonic         | MDC1     | synonymous SNV    | MDC1:NM_014641:exon10:c.G3528A:p.Q1176Q           | NA                                               | rs78306040  | NA |
| chr6 | 30918388 | 30918388 | T         | C      | exonic         | DPCR1    | nonsynonymous SNV | DPCR1:NM_080870:exon2:c.T2147C:p.L716P            | NA                                               | NA          | NA |
| chr6 | 30918690 | 30918690 | T         | C      | exonic         | DPCR1    | nonsynonymous SNV | DPCR1:NM_080870:exon2:c.T2449C:p.S817P            | NA                                               | NA          | NA |
| chr6 | 31022928 | 31022928 | C         | T      | ncRNA_intronic | HCG22    | NA                | NA                                                | NA                                               | rs62401699  | NA |
| chr6 | 31022929 | 31022929 | A         | G      | ncRNA_intronic | HCG22    | NA                | NA                                                | NA                                               | rs9262625   | NA |
| chr6 | 31324525 | 31324525 | C         | T      | exonic         | HLA-B    | nonsynonymous SNV | HLA-B:NM_005514:exon2:c.G283A:p.A95T              | NA                                               | rs1131213   | NA |
| chr6 | 31324528 | 31324528 | G         | T      | exonic         | HLA-B    | nonsynonymous SNV | HLA-B:NM_005514:exon2:c.C280A:p.Q94K              | NA                                               | rs1071817   | NA |
| chr6 | 31324547 | 31324547 | G         | C      | exonic         | HLA-B    | nonsynonymous SNV | HLA-B:NM_005514:exon2:c.C261G:p.N87K              | M329391;OCCURENCE=1(haematopoietic_and_lymphoid_ | rs151341177 | NA |
| chr6 | 31324549 | 31324549 | T         | C      | exonic         | HLA-B    | nonsynonymous SNV | HLA-B:NM_005514:exon2:c.A259G:p.N87D              | M329392;OCCURENCE=1(haematopoietic_and_lymphoid_ | rs143633217 | NA |
| chr6 | 33054656 | 33054656 | A         | C      | UTR3           | HLA-DPB1 | NA                | NA                                                | NA                                               | rs930       | NA |
| chr6 | 33054675 | 33054675 | C         | G      | UTR3           | HLA-DPB1 | NA                | NA                                                | NA                                               | rs9277529   | NA |
| chr6 | 38139332 | 38139353 | iTGTGTGTG | -      | UTR3           | BTBD9    | NA                | NA                                                | NA                                               | rs72137261  | NA |
| chr6 | 41090722 | 41090722 | C         | A      | ncRNA_exonic   | ADCY10P1 | NA                | NA                                                | NA                                               | NA          | NA |
| chr6 | 41158908 | 41158909 | TG        | -      | UTR3           | TREML2   | NA                | NA                                                | NA                                               | NA          | NA |
| chr6 | 45517740 | 45517740 | T         | -      | UTR3           | RUNX2    | NA                | NA                                                | NA                                               | rs11320232  | NA |
| chr6 | 47592425 | 47592425 | -         | TGTGTG | UTR3           | CD2AP    | NA                | NA                                                | NA                                               | NA          | NA |
| chr6 | 47792560 | 47792560 | T         | -      | UTR3           | OPN5     | NA                | NA                                                | NA                                               | NA          | NA |
| chr6 | 49460746 | 49460746 | C         | A      | UTR3           | CENPQ    | NA                | NA                                                | NA                                               | NA          | NA |
| chr6 | 49460762 | 49460762 | G         | T      | UTR3           | CENPQ    | NA                | NA                                                | NA                                               | NA          | NA |
| chr6 | 57398207 | 57398207 | G         | T      | exonic         | PRIM2    | unknown           | UNKNOWN                                           | NA                                               | rs71214816  | NA |
| chr6 | 57512841 | 57512841 | A         | G      | UTR3           | PRIM2    | NA                | NA                                                | NA                                               | rs78256005  | NA |
| chr6 | 57512850 | 57512850 | C         | G      | UTR3           | PRIM2    | NA                | NA                                                | NA                                               | rs77911716  | NA |
| chr6 | 57512889 | 57512889 | C         | T      | UTR3           | PRIM2    | NA                | NA                                                | NA                                               | rs75351177  | NA |
| chr6 | 83074365 | 83074365 | C         | T      | UTR5           | TPBG     | NA                | NA                                                | NA                                               | rs770911    | NA |
| chr6 | 97592002 | 97592005 | AAAG      | -      | ncRNA_UTR3     | MMS22L   | NA                | NA                                                | NA                                               | NA          | NA |
| chr6 | 97592005 | 97592008 | GAGA      | -      | ncRNA_UTR3     | MMS22L   | NA                | NA                                                | NA                                               | NA          | NA |
| chr6 | 99724024 | 99724024 | A         | -      | UTR3           | FAXC     | NA                | NA                                                | NA                                               | rs11307978  | NA |
| chr6 | 1.07E+08 | 1.07E+08 | C         | A      | UTR3           | PRDM1    | NA                | NA                                                | NA                                               | NA          | NA |
| chr6 | 1.07E+08 | 1.07E+08 | C         | T      | UTR3           | PRDM1    | NA                | NA                                                | NA                                               | NA          | NA |
| chr6 | 1.07E+08 | 1.07E+08 | A         | -      | UTR3           | BEND3    | NA                | NA                                                | NA                                               | NA          | NA |
| chr6 | 1.32E+08 | 1.32E+08 | C         | G      | exonic         | ARG1     | nonsynonymous SNV | 045:exon2:c.C82G:p.P28A,ARG1:NM_001244438:exon2:i | NA                                               | NA          | P  |
| chr6 | 1.37E+08 | 1.37E+08 | AA        | -      | UTR3           | PDE7B    | NA                | NA                                                | NA                                               | NA          | NA |
| chr6 | 1.39E+08 | 1.39E+08 | A         | -      | UTR3           | KIAA1244 | NA                | NA                                                | NA                                               | NA          | NA |

|      |          |          |    |    |              |               |                   |                                                    |                                 |             |    |
|------|----------|----------|----|----|--------------|---------------|-------------------|----------------------------------------------------|---------------------------------|-------------|----|
| chr6 | 1.44E+08 | 1.44E+08 | T  | -  | UTR3         | PHACTR2       | NA                | NA                                                 | NA                              | NA          | NA |
| chr6 | 1.44E+08 | 1.44E+08 | A  | T  | ncRNA_exonic | HYMAI         | NA                | NA                                                 | NA                              | rs1474882   | NA |
| chr6 | 1.49E+08 | 1.49E+08 | A  | -  | UTR3         | SASH1         | NA                | NA                                                 | NA                              | rs5880793   | NA |
| chr6 | 1.5E+08  | 1.5E+08  | T  | C  | exonic       | ULBP2         | synonymous SNV    | ULBP2:NM_025217:exon2:c.T219C:p.P73P               | NA                              | rs149454018 | NA |
| chr6 | 1.51E+08 | 1.51E+08 | G  | -  | UTR3         | PPP1R14C      | NA                | NA                                                 | NA                              | rs201167515 | NA |
| chr6 | 1.52E+08 | 1.52E+08 | -  | A  | UTR3         | CCDC170       | NA                | NA                                                 | NA                              | NA          | NA |
| chr6 | 1.58E+08 | 1.58E+08 | C  | T  | UTR3         | ARID1B        | NA                | NA                                                 | NA                              | NA          | NA |
| chr6 | 1.59E+08 | 1.59E+08 | A  | -  | UTR3         | GTF2H5        | NA                | NA                                                 | NA                              | rs3841147   | NA |
| chr6 | 1.59E+08 | 1.59E+08 | T  | -  | UTR3         | GTF2H5        | NA                | NA                                                 | NA                              | NA          | NA |
| chr6 | 1.59E+08 | 1.59E+08 | A  | C  | exonic       | TULP4         | nonsynonymous SNV | TULP4:NM_020245:exon13:c.A2306C:p.N769T            | ID=COSM400671;OCCURENCE=1(lung) | NA          | B  |
| chr6 | 1.6E+08  | 1.6E+08  | G  | T  | UTR3         | WTAP          | NA                | NA                                                 | NA                              | NA          | NA |
| chr6 | 1.6E+08  | 1.6E+08  | G  | T  | UTR3         | WTAP          | NA                | NA                                                 | NA                              | NA          | NA |
| chr6 | 1.6E+08  | 1.6E+08  | G  | T  | UTR3         | WTAP          | NA                | NA                                                 | NA                              | NA          | NA |
| chr6 | 1.6E+08  | 1.6E+08  | G  | T  | UTR3         | WTAP          | NA                | NA                                                 | NA                              | NA          | NA |
| chr6 | 1.61E+08 | 1.61E+08 | C  | A  | exonic       | MAP3K4        | nonsynonymous SNV | 22:exon4:c.C1909A:p.Q637K,MAP3K4:NM_006724:exon4   | NA                              | NA          | D  |
| chr6 | 1.68E+08 | 1.68E+08 | A  | C  | ncRNA_exonic | MLLT4-AS1     | NA                | NA                                                 | NA                              | NA          | NA |
| chr6 | 1.68E+08 | 1.68E+08 | A  | G  | exonic       | HGC6.3        | nonsynonymous SNV | HGC6.3:NM_001129895:exon1:c.T230C:p.F77S           | NA                              | NA          | NA |
| chr7 | 537506   | 537506   | -  | AA | UTR3         | PDGFA         | NA                | NA                                                 | NA                              | NA          | NA |
| chr7 | 537549   | 537549   | G  | A  | UTR3         | PDGFA         | NA                | NA                                                 | NA                              | NA          | NA |
| chr7 | 5660749  | 5660749  | A  | C  | UTR3         | RNF216        | NA                | NA                                                 | NA                              | NA          | NA |
| chr7 | 5886611  | 5886611  | C  | G  | ncRNA_exonic | ZNF815P       | NA                | NA                                                 | NA                              | rs308084    | NA |
| chr7 | 19155484 | 19155485 | AA | -  | UTR3         | TWIST1        | NA                | NA                                                 | NA                              | NA          | NA |
| chr7 | 20180426 | 20180427 | AC | -  | UTR3         | MACC1         | NA                | NA                                                 | NA                              | rs10555255  | NA |
| chr7 | 20180471 | 20180471 | C  | G  | UTR3         | MACC1         | NA                | NA                                                 | NA                              | NA          | NA |
| chr7 | 22158512 | 22158512 | C  | A  | UTR3         | RAPGEF5       | NA                | NA                                                 | NA                              | NA          | NA |
| chr7 | 23749892 | 23749892 | C  | G  | UTR5         | STK31         | NA                | NA                                                 | NA                              | NA          | NA |
| chr7 | 27147452 | 27147453 | AA | -  | UTR3         | HOXA3         | NA                | NA                                                 | NA                              | NA          | NA |
| chr7 | 30412409 | 30412409 | A  | -  | ncRNA_exonic | DKFZP58611420 | NA                | NA                                                 | NA                              | NA          | NA |
| chr7 | 35734529 | 35734529 | C  | G  | UTR5         | HERPUD2       | NA                | NA                                                 | NA                              | rs78381277  | NA |
| chr7 | 35734591 | 35734591 | -  | G  | UTR5         | HERPUD2       | NA                | NA                                                 | NA                              | rs11394396  | NA |
| chr7 | 44073817 | 44073817 | A  | G  | ncRNA_exonic | RASA4CP       | NA                | NA                                                 | NA                              | NA          | NA |
| chr7 | 44073823 | 44073823 | T  | C  | ncRNA_exonic | RASA4CP       | NA                | NA                                                 | NA                              | NA          | NA |
| chr7 | 44258943 | 44258943 | G  | T  | UTR3         | CAMK2B        | NA                | NA                                                 | NA                              | rs74582205  | NA |
| chr7 | 45123081 | 45123081 | C  | G  | exonic       | NACAD         | nonsynonymous SNV | NACAD:NM_001146334:exon2:c.G2698C:p.V900L          | NA                              | NA          | NA |
| chr7 | 45123379 | 45123379 | G  | A  | exonic       | NACAD         | synonymous SNV    | NACAD:NM_001146334:exon2:c.C2400T:p.S800S          | NA                              | NA          | NA |
| chr7 | 45123540 | 45123540 | A  | G  | exonic       | NACAD         | nonsynonymous SNV | NACAD:NM_001146334:exon2:c.T2239C:p.S747P          | NA                              | NA          | NA |
| chr7 | 66774667 | 66774667 | G  | T  | ncRNA_exonic | STAG3L4       | NA                | NA                                                 | NA                              | NA          | NA |
| chr7 | 72336469 | 72336469 | T  | -  | ncRNA_exonic | SPDYE7P       | NA                | NA                                                 | NA                              | rs58909282  | NA |
| chr7 | 72338105 | 72338105 | A  | -  | ncRNA_exonic | SPDYE7P       | NA                | NA                                                 | NA                              | NA          | NA |
| chr7 | 72338148 | 72338148 | T  | G  | ncRNA_exonic | SPDYE7P       | NA                | NA                                                 | NA                              | NA          | NA |
| chr7 | 76131725 | 76131725 | T  | C  | exonic       | DTX2          | synonymous SNV    | !595:exon7:c.T1341C:p.H447H,DTX2:NM_001102594:exo  | NA                              | NA          | NA |
| chr7 | 77558429 | 77558429 | G  | T  | exonic       | PHTF2         | nonsynonymous SNV | !,PHTF2:NM_001127357:exon10:c.G1021T:p.A341S,PHTF: | NA                              | NA          | NA |
| chr7 | 1E+08    | 1E+08    | A  | C  | exonic       | NYAP1         | nonsynonymous SNV | NYAP1:NM_173564:exon4:c.A797C:p.Y266S              | NA                              | NA          | D  |
| chr7 | 1E+08    | 1E+08    | A  | C  | exonic       | NYAP1         | synonymous SNV    | NYAP1:NM_173564:exon4:c.A843C:p.P281P              | NA                              | NA          | NA |
| chr7 | 1E+08    | 1E+08    | C  | A  | exonic       | ZAN           | unknown           | UNKNOWN                                            | NA                              | NA          | NA |
| chr7 | 1.01E+08 | 1.01E+08 | C  | G  | exonic       | MUC12         | nonsynonymous SNV | MUC12:NM_001164462:exon2:c.C2632G:p.H878D          | NA                              | NA          | NA |
| chr7 | 1.01E+08 | 1.01E+08 | T  | A  | exonic       | MUC12         | nonsynonymous SNV | MUC12:NM_001164462:exon2:c.T2634A:p.H878Q          | NA                              | NA          | NA |
| chr7 | 1.01E+08 | 1.01E+08 | T  | C  | exonic       | MUC12         | synonymous SNV    | MUC12:NM_001164462:exon2:c.T2670C:p.D890D          | NA                              | NA          | NA |
| chr7 | 1.01E+08 | 1.01E+08 | A  | C  | exonic       | MUC12         | nonsynonymous SNV | MUC12:NM_001164462:exon2:c.A2682C:p.L894F          | NA                              | NA          | NA |
| chr7 | 1.01E+08 | 1.01E+08 | A  | T  | exonic       | MUC12         | synonymous SNV    | MUC12:NM_001164462:exon2:c.A2721T:p.S907S          | NA                              | NA          | NA |
| chr7 | 1.01E+08 | 1.01E+08 | A  | C  | exonic       | MUC12         | nonsynonymous SNV | MUC12:NM_001164462:exon2:c.A2798C:p.Q933P          | NA                              | NA          | NA |
| chr7 | 1.01E+08 | 1.01E+08 | G  | A  | exonic       | MUC12         | nonsynonymous SNV | MUC12:NM_001164462:exon2:c.G2995A:p.A999T          | NA                              | NA          | NA |
| chr7 | 1.01E+08 | 1.01E+08 | C  | G  | exonic       | MUC12         | nonsynonymous SNV | MUC12:NM_001164462:exon2:c.C3004G:p.H1002D         | NA                              | NA          | NA |
| chr7 | 1.01E+08 | 1.01E+08 | C  | G  | exonic       | MUC12         | nonsynonymous SNV | MUC12:NM_001164462:exon2:c.C3067G:p.R1023G         | NA                              | NA          | NA |
| chr7 | 1.01E+08 | 1.01E+08 | G  | A  | exonic       | MUC12         | nonsynonymous SNV | MUC12:NM_001164462:exon2:c.G3076A:p.G1026S         | NA                              | NA          | NA |
| chr7 | 1.01E+08 | 1.01E+08 | G  | C  | exonic       | MUC12         | nonsynonymous SNV | MUC12:NM_001164462:exon2:c.G7226C:p.S2409T         | NA                              | NA          | NA |
| chr7 | 1.01E+08 | 1.01E+08 | G  | A  | exonic       | MUC12         | nonsynonymous SNV | MUC12:NM_001164462:exon2:c.G8069A:p.R2690H         | NA                              | NA          | NA |
| chr7 | 1.01E+08 | 1.01E+08 | G  | C  | exonic       | MUC12         | nonsynonymous SNV | MUC12:NM_001164462:exon2:c.G10142C:p.S3381T        | NA                              | NA          | NA |
| chr7 | 1.01E+08 | 1.01E+08 | G  | A  | exonic       | MUC12         | nonsynonymous SNV | MUC12:NM_001164462:exon2:c.G10238A:p.S3413N        | NA                              | rs200547720 | NA |
| chr7 | 1.01E+08 | 1.01E+08 | C  | T  | exonic       | MUC12         | nonsynonymous SNV | MUC12:NM_001164462:exon2:c.C11036T:p.T3679I        | NA                              | rs201665808 | NA |
| chr7 | 1.01E+08 | 1.01E+08 | C  | G  | exonic       | MUC12         | nonsynonymous SNV | MUC12:NM_001164462:exon2:c.C11327G:p.P3776R        | NA                              | rs201148522 | NA |
| chr7 | 1.05E+08 | 1.05E+08 | C  | A  | ncRNA_exonic | LHFPL3-AS2    | NA                | NA                                                 | NA                              | NA          | NA |

|      |          |          |        |           |              |                    |                   |                                                                                       |                                    |             |    |
|------|----------|----------|--------|-----------|--------------|--------------------|-------------------|---------------------------------------------------------------------------------------|------------------------------------|-------------|----|
| chr7 | 1.06E+08 | 1.06E+08 | G      | A         | exonic       | CDHR3              | nonsynonymous SNV | CDHR3:NM_152750:exon12:c.G1586A:p.C529Y                                               | NA                                 | rs6967330   | NA |
| chr7 | 1.07E+08 | 1.07E+08 | A      | C         | UTR3         | COG5               | NA                | NA                                                                                    | NA                                 | NA          | NA |
| chr7 | 1.16E+08 | 1.16E+08 | -      | A         | UTR3         | CAV2               | NA                | NA                                                                                    | NA                                 | NA          | NA |
| chr7 | 1.2E+08  | 1.2E+08  | A      | C         | exonic       | KCND2              | synonymous SNV    | KCND2:NM_012281:exon1:c.A873C:p.T291T                                                 | NA                                 | NA          | NA |
| chr7 | 1.21E+08 | 1.21E+08 | A      | C         | exonic       | WNT16              | nonsynonymous SNV | .6087:exon2:c.A253C:p.T85P,WNT16:NM_057168:exon2:c                                    | NA                                 | NA          | B  |
| chr7 | 1.22E+08 | 1.22E+08 | G      | A         | exonic       | AASS               | nonsynonymous SNV | AASS:NM_005763:exon14:c.C1456T:p.L486F                                                | NA                                 | NA          | D  |
| chr7 | 1.23E+08 | 1.23E+08 | AA     | -         | UTR3         | SLC13A1            | NA                | NA                                                                                    | NA                                 | NA          | NA |
| chr7 | 1.23E+08 | 1.23E+08 | T      | G         | exonic       | WASL               | synonymous SNV    | WASL:NM_003941:exon9:c.A1119C:p.P373P                                                 | NA                                 | NA          | NA |
| chr7 | 1.28E+08 | 1.28E+08 | A      | -         | UTR3         | LEP                | NA                | NA                                                                                    | NA                                 | rs112344366 | NA |
| chr7 | 1.3E+08  | 1.3E+08  | TGTGTG | -         | UTR3         | CPA4               | NA                | NA                                                                                    | NA                                 | rs146877444 | NA |
| chr7 | 1.31E+08 | 1.31E+08 | C      | A         | exonic       | PODXL              | nonsynonymous SNV | 118111:exon2:c.G488T:p.S163I,PODXL:NM_005397:exon2                                    | NA                                 | NA          | P  |
| chr7 | 1.39E+08 | 1.39E+08 | A      | C         | UTR3         | HIPK2              | NA                | NA                                                                                    | NA                                 | NA          | NA |
| chr7 | 1.4E+08  | 1.4E+08  | AA     | -         | ncRNA_exonic | NDUFB2-AS1         | NA                | NA                                                                                    | NA                                 | NA          | NA |
| chr7 | 1.42E+08 | 1.42E+08 | T      | C         | exonic       | PRSS1              | synonymous SNV    | PRSS1:NM_002769:exon4:c.T567C:p.L189L                                                 | NA                                 | NA          | NA |
| chr7 | 1.43E+08 | 1.43E+08 | A      | G         | exonic       | CTAGE15            | synonymous SNV    | CTAGE15:NM_001008747:exon1:c.A1839G:p.G613G                                           | NA                                 | NA          | NA |
| chr7 | 1.43E+08 | 1.43E+08 | T      | A         | exonic       | CTAGE15            | synonymous SNV    | CTAGE15:NM_001008747:exon1:c.T1869A:p.P623P                                           | NA                                 | NA          | NA |
| chr7 | 1.43E+08 | 1.43E+08 | T      | C         | exonic       | CTAGE15            | nonsynonymous SNV | CTAGE15:NM_001008747:exon1:c.T1915C:p.S639P                                           | NA                                 | NA          | NA |
| chr7 | 1.44E+08 | 1.44E+08 | A      | G         | exonic       | CTAGE4             | synonymous SNV    | CTAGE4:NM_198495:exon1:c.T2268C:p.Y756Y                                               | NA                                 | rs202035285 | NA |
| chr7 | 1.51E+08 | 1.51E+08 | C      | A         | exonic       | ASB10              | nonsynonymous SNV | C260F,ASB10:NM_001142460:exon3:c.G779T:p.C260F,AS                                     | NA                                 | NA          | B  |
| chr7 | 1.52E+08 | 1.52E+08 | A      | T         | UTR3         | GALNT11            | NA                | NA                                                                                    | NA                                 | NA          | NA |
| chr7 | 1.52E+08 | 1.52E+08 | C      | G         | exonic       | MLL3               | nonsynonymous SNV | MLL3:NM_170606:exon16:c.G2755C:p.V919L D=COSM1131646,COSM1131647;OCCURENCE=1(prostate | rs111791757                        | B           |    |
| chr7 | 1.55E+08 | 1.55E+08 | C      | A         | ncRNA_exonic | LOC202781          | NA                | NA                                                                                    | NA                                 | NA          | NA |
| chr8 | 1729586  | 1729586  | T      | G         | UTR3         | CLN8               | NA                | NA                                                                                    | NA                                 | NA          | NA |
| chr8 | 1733665  | 1733665  | T      | G         | UTR3         | CLN8               | NA                | NA                                                                                    | NA                                 | NA          | NA |
| chr8 | 2793892  | 2793892  | -      | AT        | UTR3         | CSMD1              | NA                | NA                                                                                    | NA                                 | rs138563405 | NA |
| chr8 | 10464990 | 10464990 | T      | C         | exonic       | RP1L1              | synonymous SNV    | RP1L1:NM_178857:exon4:c.A6618G:p.Q2206Q                                               | NA                                 | NA          | NA |
| chr8 | 10465086 | 10465086 | T      | C         | exonic       | RP1L1              | synonymous SNV    | RP1L1:NM_178857:exon4:c.A6522G:p.Q2174Q                                               | NA                                 | NA          | NA |
| chr8 | 11279878 | 11279878 | T      | G         | ncRNA_UTR3   | FAM167A            | NA                | NA                                                                                    | NA                                 | rs113139618 | NA |
| chr8 | 11973535 | 11973535 | A      | G         | ncRNA_exonic | FAM66D             | NA                | NA                                                                                    | NA                                 | NA          | NA |
| chr8 | 12040998 | 12040998 | G      | A         | UTR3         | FAM86B1            | NA                | NA                                                                                    | NA                                 | rs141787656 | NA |
| chr8 | 12283157 | 12283157 | T      | C         | UTR3         | FAM86B2            | NA                | NA                                                                                    | NA                                 | rs2698896   | NA |
| chr8 | 17079490 | 17079491 | TT     | -         | UTR3         | ZDHHC2             | NA                | NA                                                                                    | NA                                 | NA          | NA |
| chr8 | 17579505 | 17579505 | A      | -         | UTR5         | MTUS1              | NA                | NA                                                                                    | NA                                 | rs34302917  | NA |
| chr8 | 20106557 | 20106557 | A      | G         | UTR3         | LZTS1              | NA                | NA                                                                                    | NA                                 | NA          | NA |
| chr8 | 23536561 | 23536563 | TTT    | -         | UTR3         | NKX3-1             | NA                | NA                                                                                    | NA                                 | rs140739091 | NA |
| chr8 | 28205758 | 28205758 | A      | C         | UTR3         | ZNF395             | NA                | NA                                                                                    | NA                                 | NA          | NA |
| chr8 | 41481358 | 41481358 | T      | -         | UTR3         | AGPAT6             | NA                | NA                                                                                    | NA                                 | NA          | NA |
| chr8 | 41788246 | 41788246 | A      | T         | UTR3         | KAT6A              | NA                | NA                                                                                    | NA                                 | NA          | NA |
| chr8 | 52733242 | 52733242 | C      | T         | exonic       | PCMTD1             | nonsynonymous SNV | PCMTD1:NM_052937:exon6:c.G743A:p.R248H                                                | NA                                 | rs79820636  | D  |
| chr8 | 57307835 | 57307835 | C      | A         | intergenic   | dist=74594),PENK(d | NA                | NA                                                                                    | NA                                 | NA          | NA |
| chr8 | 75279333 | 75279333 | -      | AAA       | UTR3         | GDAP1              | NA                | NA                                                                                    | NA                                 | NA          | NA |
| chr8 | 86572249 | 86572249 | A      | G         | UTR3         | REXO1L1            | NA                | NA                                                                                    | NA                                 | rs28564465  | NA |
| chr8 | 88884730 | 88884730 | A      | -         | UTR3         | DCAF4L2            | NA                | NA                                                                                    | NA                                 | rs57457601  | NA |
| chr8 | 92971184 | 92971184 | T      | -         | UTR3         | RUNX1T1            | NA                | NA                                                                                    | NA                                 | NA          | NA |
| chr8 | 98787930 | 98787930 | -      | AGAGCTCCA | UTR5         | LAPTM4B            | NA                | NA                                                                                    | NA                                 | rs146027280 | NA |
| chr8 | 1.02E+08 | 1.02E+08 | G      | A         | exonic       | PABPC1             | nonsynonymous SNV | PABPC1:NM_002568:exon11:c.C1477T:p.R493C                                              | NA                                 | rs62513924  | P  |
| chr8 | 1.16E+08 | 1.16E+08 | C      | A         | UTR3         | TRPS1              | NA                | NA                                                                                    | NA                                 | NA          | NA |
| chr8 | 1.23E+08 | 1.23E+08 | C      | T         | ncRNA_UTR5   | HAS2               | NA                | NA                                                                                    | NA                                 | NA          | NA |
| chr8 | 1.23E+08 | 1.23E+08 | C      | T         | ncRNA_UTR5   | HAS2               | NA                | NA                                                                                    | NA                                 | NA          | NA |
| chr8 | 1.31E+08 | 1.31E+08 | T      | C         | exonic       | ASAP1              | nonsynonymous SNV | :exon24:c.A2182G:p.I728V,ASAP1:NM_001247996:exon2                                     | ID=COSM150541;OCCURENCE=1(stomach) | rs966185    | B  |
| chr8 | 1.32E+08 | 1.32E+08 | C      | A         | exonic       | ADCY8              | nonsynonymous SNV | ADCY8:NM_001115:exon4:c.G1252T:p.A418S                                                | NA                                 | NA          | D  |
| chr8 | 1.34E+08 | 1.34E+08 | TT     | -         | UTR3         | SLA                | NA                | NA                                                                                    | NA                                 | NA          | NA |
| chr8 | 1.46E+08 | 1.46E+08 | C      | A         | UTR3         | ZNF250             | NA                | NA                                                                                    | NA                                 | NA          | NA |
| chr8 | 1.46E+08 | 1.46E+08 | T      | A         | ncRNA_exonic | TMED10P1           | NA                | NA                                                                                    | NA                                 | NA          | NA |
| chr9 | 117998   | 117998   | G      | T         | exonic       | FOXD4              | nonsynonymous SNV | FOXD4:NM_207305:exon1:c.C122A:p.A41E                                                  | ID=COSM226644;OCCURENCE=1(skin)    | rs66612967  | B  |
| chr9 | 711797   | 711797   | A      | G         | exonic       | KANK1              | nonsynonymous SNV | xon3:c.A1031G:p.E344G,KANK1:NM_001256877:exon4:c.                                     | NA                                 | rs76363411  | D  |
| chr9 | 5128081  | 5128086  | TGTGTG | -         | UTR3         | JAK2               | NA                | NA                                                                                    | NA                                 | rs139964957 | NA |
| chr9 | 14083479 | 14083479 | A      | -         | UTR3         | NFIB               | NA                | NA                                                                                    | NA                                 | NA          | NA |
| chr9 | 33043991 | 33043992 | AA     | -         | UTR3         | SMU1               | NA                | NA                                                                                    | NA                                 | rs141620295 | NA |
| chr9 | 33111314 | 33111314 | T      | A         | UTR3         | B4GALT1            | NA                | NA                                                                                    | NA                                 | NA          | NA |
| chr9 | 33385667 | 33385667 | A      | G         | exonic       | AQP7               | synonymous SNV    | AQP7:NM_001170:exon7:c.T723C:p.G241G                                                  | NA                                 | rs79779983  | NA |
| chr9 | 33385698 | 33385698 | A      | G         | exonic       | AQP7               | nonsynonymous SNV | AQP7:NM_001170:exon7:c.T692C:p.L231P                                                  | NA                                 | rs145516206 | B  |

|       |          |          |          |          |              |                  |                   |                                                     |                                                  |             |    |
|-------|----------|----------|----------|----------|--------------|------------------|-------------------|-----------------------------------------------------|--------------------------------------------------|-------------|----|
| chr9  | 33385712 | 33385712 | G        | A        | exonic       | AQP7             | synonymous SNV    | AQP7:NM_001170:exon7:c.C678T:p.N226N                | NA                                               | rs115575789 | NA |
| chr9  | 33385733 | 33385733 | C        | T        | exonic       | AQP7             | nonsynonymous SNV | AQP7:NM_001170:exon7:c.G657A:p.M219I                | =COSM1180629;OCCURENCE=1(upper_aerodigestive_tra | rs201117022 | B  |
| chr9  | 33385740 | 33385740 | A        | T        | exonic       | AQP7             | nonsynonymous SNV | AQP7:NM_001170:exon7:c.T650A:p.L217H                | NA                                               | rs201773300 | B  |
| chr9  | 66500435 | 66500435 | C        | A        | ncRNA_exonic | TGER4P2-CDK2AP2F | NA                | NA                                                  | NA                                               | rs200229634 | NA |
| chr9  | 69202059 | 69202059 | T        | C        | UTR5         | FOXD4L6          | NA                | NA                                                  | NA                                               | NA          | NA |
| chr9  | 69424311 | 69424311 | C        | A        | UTR3         | ANKRD20A4        | NA                | NA                                                  | NA                                               | rs3866289   | NA |
| chr9  | 70177559 | 70177559 | A        | G        | exonic       | FOXD4L5          | nonsynonymous SNV | FOXD4L5:NM_001126334:exon1:c.T425C:p.F142S          | NA                                               | NA          | NA |
| chr9  | 70912543 | 70912543 | A        | T        | exonic       | CBWD3            | nonsynonymous SNV | CBWD3:NM_201453:exon12:c.A864T:p.E288D              | NA                                               | rs1127334   | B  |
| chr9  | 99538299 | 99538299 | C        | A        | exonic       | ZNF510           | nonsynonymous SNV | ZNF510:NM_014930:exon2:c.G53T:p.G18V                | NA                                               | NA          | D  |
| chr9  | 99672115 | 99672115 | C        | T        | ncRNA_exonic | LOC441454        | NA                | NA                                                  | NA                                               | rs201340221 | NA |
| chr9  | 1.02E+08 | 1.02E+08 | G        | T        | UTR3         | TGFBR1           | NA                | NA                                                  | NA                                               | rs199545273 | NA |
| chr9  | 1.04E+08 | 1.04E+08 | T        | -        | UTR3         | LPPR1            | NA                | NA                                                  | NA                                               | rs60292880  | NA |
| chr9  | 1.1E+08  | 1.1E+08  | A        | C        | exonic       | ZNF462           | nonsynonymous SNV | ZNF462:NM_021224:exon3:c.A4303C:p.T1435P            | NA                                               | NA          | B  |
| chr9  | 1.12E+08 | 1.12E+08 | T        | -        | UTR3         | TMEM245          | NA                | NA                                                  | NA                                               | NA          | NA |
| chr9  | 1.16E+08 | 1.16E+08 | G        | T        | UTR3         | SNX30            | NA                | NA                                                  | NA                                               | rs113416907 | NA |
| chr9  | 1.31E+08 | 1.31E+08 | T        | C        | exonic       | CERCAM           | nonsynonymous SNV | CERCAM:NM_016174:exon5:c.T590C:p.F197S              | NA                                               | NA          | P  |
| chr9  | 1.31E+08 | 1.31E+08 | A        | G        | exonic       | CERCAM           | synonymous SNV    | CERCAM:NM_016174:exon5:c.A672G:p.E224E              | NA                                               | NA          | NA |
| chr9  | 1.32E+08 | 1.32E+08 | C        | G        | UTR3         | PPP2R4           | NA                | NA                                                  | NA                                               | NA          | NA |
| chr9  | 1.32E+08 | 1.32E+08 | C        | G        | UTR3         | PPP2R4           | NA                | NA                                                  | NA                                               | NA          | NA |
| chr9  | 1.32E+08 | 1.32E+08 | T        | A        | UTR3         | PPP2R4           | NA                | NA                                                  | NA                                               | NA          | NA |
| chr9  | 1.33E+08 | 1.33E+08 | A        | -        | UTR3         | FNBP1            | NA                | NA                                                  | NA                                               | rs5900873   | NA |
| chr9  | 1.34E+08 | 1.34E+08 | C        | T        | UTR5         | PPAPDC3          | NA                | NA                                                  | NA                                               | rs7041276   | NA |
| chr9  | 1.35E+08 | 1.35E+08 | C        | T        | UTR3         | NTNG2            | NA                | NA                                                  | NA                                               | NA          | NA |
| chr9  | 1.36E+08 | 1.36E+08 | T        | G        | UTR3         | ABO              | NA                | NA                                                  | NA                                               | NA          | NA |
| chr9  | 1.36E+08 | 1.36E+08 | G        | T        | UTR5         | ADAMTSL2         | NA                | NA                                                  | NA                                               | NA          | NA |
| chr9  | 1.4E+08  | 1.4E+08  | A        | G        | exonic       | KIAA1984         | nonsynonymous SNV | KIAA1984:NM_001039374:exon10:c.A1070G:p.E357G       | NA                                               | NA          | P  |
| chr9  | 1.41E+08 | 1.41E+08 | T        | C        | ncRNA_exonic | TUBBP5           | NA                | NA                                                  | NA                                               | rs28578364  | NA |
| chr10 | 1209490  | 1209490  | A        | G        | ncRNA_exonic | LINC00200        | NA                | NA                                                  | NA                                               | rs10903391  | NA |
| chr10 | 1209495  | 1209495  | G        | C        | ncRNA_exonic | LINC00200        | NA                | NA                                                  | NA                                               | rs11250303  | NA |
| chr10 | 6157836  | 6157839  | AAAA     | -        | UTR3         | RBM17            | NA                | NA                                                  | NA                                               | rs71390125  | NA |
| chr10 | 17840303 | 17840303 | T        | C        | UTR3         | TMEM236          | NA                | NA                                                  | NA                                               | rs34022011  | NA |
| chr10 | 21803421 | 21803421 | -        | A        | UTR3         | SKIDA1           | NA                | NA                                                  | NA                                               | NA          | NA |
| chr10 | 21807470 | 21807470 | A        | -        | UTR5         | SKIDA1           | NA                | NA                                                  | NA                                               | rs111265769 | NA |
| chr10 | 21807780 | 21807781 | TT       | -        | UTR5         | SKIDA1           | NA                | NA                                                  | NA                                               | NA          | NA |
| chr10 | 24873151 | 24873152 | AT       | -        | UTR3         | ARHGAP21         | NA                | NA                                                  | NA                                               | rs35918968  | NA |
| chr10 | 29801764 | 29801764 | T        | C        | exonic       | SVIL             | nonsynonymous SNV | l:exon15:c.A2138G;p.E713G,SVIL:NM_021738:exon17:c.A | NA                                               | NA          | D  |
| chr10 | 45496046 | 45496046 | C        | A        | exonic       | C10orf25         | stopgain SNV      | C10orf25:NM_001039380:exon1:c.G262T:p.E88X          | NA                                               | NA          | NA |
| chr10 | 46963951 | 46963951 | G        | A        | exonic       | SYT15            | synonymous SNV    | 912:exon7:c.C1012T;p.L338L,SYT15:NM_181519:exon7:c. | NA                                               | rs55945664  | NA |
| chr10 | 49812917 | 49812917 | T        | C        | UTR5         | ARHGAP22         | NA                | NA                                                  | NA                                               | rs17010948  | NA |
| chr10 | 50223165 | 50223166 | TT       | -        | UTR3         | VSTM4            | NA                | NA                                                  | NA                                               | NA          | NA |
| chr10 | 50966445 | 50966445 | C        | A        | exonic       | OGDHL            | nonsynonymous SNV | .143996:exon2:c.G194T;p.S65I,OGDHL:NM_018245:exon2  | NA                                               | NA          | D  |
| chr10 | 51226439 | 51226439 | T        | G        | exonic       | AGAP8            | nonsynonymous SNV | 81N,AGAP8:NM_001276344:exon7:c.A543C:p.K181N,AG/    | NA                                               | rs201124655 | B  |
| chr10 | 51748584 | 51748584 | A        | G        | exonic       | AGAP6            | nonsynonymous SNV | AGAP6:NM_001077665:exon1:c.A109G:p.R37G             | NA                                               | rs200504295 | NA |
| chr10 | 60474828 | 60474828 | A        | -        | ncRNA_exonic | FAM133CP         | NA                | NA                                                  | NA                                               | NA          | NA |
| chr10 | 62544601 | 62544601 | G        | T        | exonic       | CDK1             | nonsynonymous SNV | 1170407:exon3:c.G176T;p.R59L,CDK1:NM_001786:exon3   | NA                                               | NA          | B  |
| chr10 | 63955366 | 63955381 | GAAGGAAG | -        | UTR3         | RTKN2            | NA                | NA                                                  | NA                                               | NA          | NA |
| chr10 | 70043500 | 70043500 | -        | TG       | UTR3         | PBLD             | NA                | NA                                                  | NA                                               | NA          | NA |
| chr10 | 71267385 | 71267385 | G        | T        | UTR3         | TSPAN15          | NA                | NA                                                  | NA                                               | NA          | NA |
| chr10 | 71333106 | 71333106 | G        | C        | UTR5         | NEUROG3          | NA                | NA                                                  | NA                                               | rs10998862  | NA |
| chr10 | 72328155 | 72328155 | T        | -        | UTR3         | PALD1            | NA                | NA                                                  | NA                                               | rs71012215  | NA |
| chr10 | 79741920 | 79741920 | T        | G        | exonic       | POLR3A           | nonsynonymous SNV | POLR3A:NM_007055:exon28:c.A3751C:p.T1251P           | NA                                               | NA          | P  |
| chr10 | 81587323 | 81587323 | A        | -        | ncRNA_exonic | LOC642361        | NA                | NA                                                  | NA                                               | NA          | NA |
| chr10 | 87359676 | 87359676 | -        | CTCACACA | ncRNA_UTR3   | GRID1            | NA                | NA                                                  | NA                                               | NA          | NA |
| chr10 | 88677008 | 88677008 | A        | T        | exonic       | BMPR1A           | nonsynonymous SNV | BMPR1A:NM_004329:exon9:c.A793T:p.T265S              | NA                                               | NA          | P  |
| chr10 | 88677045 | 88677045 | T        | A        | exonic       | BMPR1A           | nonsynonymous SNV | BMPR1A:NM_004329:exon9:c.T830A:p.I277N              | NA                                               | NA          | D  |
| chr10 | 89125529 | 89125529 | G        | C        | ncRNA_exonic | NUTM2D           | NA                | NA                                                  | NA                                               | rs2767120   | D  |
| chr10 | 89619806 | 89619806 | G        | A        | UTR3         | KLLN             | NA                | NA                                                  | NA                                               | NA          | NA |
| chr10 | 89726612 | 89726612 | G        | A        | UTR3         | PTEN             | NA                | NA                                                  | NA                                               | NA          | NA |
| chr10 | 99192863 | 99192863 | -        | ATAA     | UTR3         | PGAM1            | NA                | NA                                                  | NA                                               | NA          | NA |
| chr10 | 99371771 | 99371771 | C        | T        | UTR3         | HOGA1            | NA                | NA                                                  | NA                                               | rs1977642   | NA |
| chr10 | 1.02E+08 | 1.02E+08 | G        | T        | UTR3         | HIF1AN           | NA                | NA                                                  | NA                                               | rs75780010  | NA |
| chr10 | 1.02E+08 | 1.02E+08 | G        | T        | UTR3         | HIF1AN           | NA                | NA                                                  | NA                                               | NA          | NA |

|       |          |          |     |     |              |              |                      |                                                    |                                                |             |    |
|-------|----------|----------|-----|-----|--------------|--------------|----------------------|----------------------------------------------------|------------------------------------------------|-------------|----|
| chr10 | 1.16E+08 | 1.16E+08 | T   | C   | UTR3         | PLEKHS1      | NA                   | NA                                                 | NA                                             | NA          | NA |
| chr10 | 1.18E+08 | 1.18E+08 | -   | TG  | UTR3         | GFRA1        | NA                   | NA                                                 | NA                                             | NA          | NA |
| chr10 | 1.18E+08 | 1.18E+08 | T   | A   | UTR3         | GFRA1        | NA                   | NA                                                 | NA                                             | rs142941024 | NA |
| chr10 | 1.18E+08 | 1.18E+08 | T   | A   | UTR3         | GFRA1        | NA                   | NA                                                 | NA                                             | rs145714787 | NA |
| chr10 | 1.21E+08 | 1.21E+08 | C   | A   | UTR3         | TIAL1        | NA                   | NA                                                 | NA                                             | rs111740135 | NA |
| chr10 | 1.26E+08 | 1.26E+08 | A   | C   | UTR3         | FAM53B       | NA                   | NA                                                 | NA                                             | rs1057103   | NA |
| chr10 | 1.27E+08 | 1.27E+08 | T   | A   | UTR3         | CTBP2        | NA                   | NA                                                 | NA                                             | NA          | NA |
| chr10 | 1.27E+08 | 1.27E+08 | T   | A   | UTR3         | CTBP2        | NA                   | NA                                                 | NA                                             | NA          | NA |
| chr10 | 1.27E+08 | 1.27E+08 | T   | -   | exonic       | CTBP2        | frameshift deletion  | 83914:exon3:c.57delA:p.E19fs,CTBP2:NM_001329:exon3 | NA                                             | NA          | NA |
| chr10 | 1.28E+08 | 1.28E+08 | C   | T   | UTR5         | FANK1        | NA                   | NA                                                 | NA                                             | rs79612842  | NA |
| chr10 | 1.28E+08 | 1.28E+08 | G   | C   | UTR5         | FANK1        | NA                   | NA                                                 | NA                                             | rs80288044  | NA |
| chr10 | 1.28E+08 | 1.28E+08 | C   | A   | UTR5         | FANK1        | NA                   | NA                                                 | NA                                             | rs74162870  | NA |
| chr10 | 1.3E+08  | 1.3E+08  | T   | C   | UTR3         | FOXI2        | NA                   | NA                                                 | NA                                             | NA          | NA |
| chr10 | 1.3E+08  | 1.3E+08  | T   | C   | UTR3         | FOXI2        | NA                   | NA                                                 | NA                                             | NA          | NA |
| chr10 | 1.34E+08 | 1.34E+08 | A   | G   | exonic       | DPYSL4       | nonsynonymous SNV    | DPYSL4:NM_006426:exon8:c.A773G:p.K258R             | NA                                             | NA          | B  |
| chr10 | 1.34E+08 | 1.34E+08 | A   | T   | UTR3         | LRRC27       | NA                   | NA                                                 | NA                                             | rs113666011 | NA |
| chr10 | 1.35E+08 | 1.35E+08 | G   | A   | exonic       | FRG2B        | synonymous SNV       | FRG2B:NM_001080998:exon3:c.C312T:p.D104D           | NA                                             | NA          | NA |
| chr11 | 128770   | 128770   | C   | T   | ncRNA_exonic | LOC100133161 | NA                   | NA                                                 | NA                                             | NA          | NA |
| chr11 | 1017277  | 1017277  | A   | G   | exonic       | MUC6         | nonsynonymous SNV    | MUC6:NM_005961:exon31:c.T5524C:p.S1842P            | NA                                             | rs111373859 | NA |
| chr11 | 1017440  | 1017440  | C   | T   | exonic       | MUC6         | synonymous SNV       | MUC6:NM_005961:exon31:c.G5361A:p.S1787S            | NA                                             | rs78729877  | NA |
| chr11 | 1018228  | 1018228  | G   | A   | exonic       | MUC6         | synonymous SNV       | MUC6:NM_005961:exon31:c.C4573T:p.L1525L            | NA                                             | NA          | NA |
| chr11 | 1018290  | 1018290  | G   | A   | exonic       | MUC6         | nonsynonymous SNV    | MUC6:NM_005961:exon31:c.C4511T:p.P1504L            | NA                                             | NA          | NA |
| chr11 | 1018341  | 1018341  | G   | A   | exonic       | MUC6         | nonsynonymous SNV    | MUC6:NM_005961:exon31:c.C4460T:p.P1487L            | NA                                             | rs79748612  | NA |
| chr11 | 1090928  | 1090928  | A   | C   | exonic       | MUC2         | nonsynonymous SNV    | MUC2:NM_002457:exon28:c.A3823C:p.T1275P            | NA                                             | NA          | NA |
| chr11 | 1090937  | 1090937  | A   | C   | exonic       | MUC2         | nonsynonymous SNV    | MUC2:NM_002457:exon28:c.A3832C:p.T1278P            | NA                                             | NA          | NA |
| chr11 | 1093452  | 1093452  | G   | A   | exonic       | MUC2         | synonymous SNV       | MUC2:NM_002457:exon30:c.G5271A:p.P1757P            | D=COSM1127915,COSM1127916;OCCURENCE=1(prostate | rs34136803  | NA |
| chr11 | 1264381  | 1264381  | A   | C   | exonic       | MUC5B        | nonsynonymous SNV    | MUC5B:NM_002458:exon31:c.A6271C:p.T2091P           | NA                                             | NA          | NA |
| chr11 | 1269500  | 1269500  | T   | C   | exonic       | MUC5B        | nonsynonymous SNV    | MUC5B:NM_002458:exon31:c.T11390C:p.I3797T          | NA                                             | NA          | NA |
| chr11 | 1271763  | 1271763  | A   | C   | exonic       | MUC5B        | synonymous SNV       | MUC5B:NM_002458:exon31:c.A13653C:p.T4551T          | :COSM1152309,COSM924786;OCCURENCE=1(endometriu | NA          | NA |
| chr11 | 1605892  | 1605892  | A   | G   | exonic       | KRTAP5-1     | synonymous SNV       | KRTAP5-1:NM_001005922:exon1:c.T588C:p.G196G        | NA                                             | NA          | NA |
| chr11 | 1605916  | 1605916  | A   | G   | exonic       | KRTAP5-1     | synonymous SNV       | KRTAP5-1:NM_001005922:exon1:c.T564C:p.G188G        | NA                                             | NA          | NA |
| chr11 | 1605919  | 1605919  | G   | A   | exonic       | KRTAP5-1     | synonymous SNV       | KRTAP5-1:NM_001005922:exon1:c.C561T:p.C187C        | NA                                             | NA          | NA |
| chr11 | 1606166  | 1606166  | G   | C   | exonic       | KRTAP5-1     | nonsynonymous SNV    | KRTAP5-1:NM_001005922:exon1:c.C314G:p.S105C        | NA                                             | NA          | NA |
| chr11 | 2696063  | 2696063  | A   | -   | ncRNA_exonic | KCNQ1OT1     | NA                   | NA                                                 | NA                                             | rs34219164  | NA |
| chr11 | 2720927  | 2720927  | C   | T   | ncRNA_exonic | KCNQ1OT1     | NA                   | NA                                                 | NA                                             | rs12360708  | NA |
| chr11 | 6633033  | 6633033  | A   | C   | exonic       | TAF10        | synonymous SNV       | TAF10:NM_006284:exon2:c.T249G:p.G83G               | NA                                             | NA          | NA |
| chr11 | 9304488  | 9304488  | A   | -   | UTR3         | TMEM41B      | NA                   | NA                                                 | NA                                             | rs56313114  | NA |
| chr11 | 21555994 | 21555994 | C   | A   | exonic       | NELL1        | nonsynonymous SNV    | NELL1:NM_006157:exon16:c.C1720A:p.H574N            | NA                                             | NA          | D  |
| chr11 | 26690764 | 26690764 | T   | C   | UTR3         | SLC5A12      | NA                   | NA                                                 | NA                                             | NA          | NA |
| chr11 | 33757941 | 33757941 | A   | G   | UTR5         | CD59         | NA                   | NA                                                 | NA                                             | rs13614     | NA |
| chr11 | 35829803 | 35829803 | G   | A   | UTR3         | TRIM44       | NA                   | NA                                                 | NA                                             | NA          | NA |
| chr11 | 46383244 | 46383244 | C   | A   | UTR5         | DGKZ         | NA                   | NA                                                 | NA                                             | NA          | NA |
| chr11 | 56959046 | 56959046 | T   | G   | UTR3         | LRRC55       | NA                   | NA                                                 | NA                                             | NA          | NA |
| chr11 | 56959052 | 56959052 | T   | G   | UTR3         | LRRC55       | NA                   | NA                                                 | NA                                             | NA          | NA |
| chr11 | 56959056 | 56959056 | A   | G   | UTR3         | LRRC55       | NA                   | NA                                                 | NA                                             | NA          | NA |
| chr11 | 56959061 | 56959061 | T   | G   | UTR3         | LRRC55       | NA                   | NA                                                 | NA                                             | NA          | NA |
| chr11 | 61405598 | 61405598 | -   | AAA | ncRNA_exonic | RPLP0P2      | NA                   | NA                                                 | NA                                             | NA          | NA |
| chr11 | 61560372 | 61560372 | C   | T   | UTR5         | FEN1         | NA                   | NA                                                 | NA                                             | NA          | NA |
| chr11 | 61567669 | 61567669 | T   | -   | UTR3         | FADS1        | NA                   | NA                                                 | NA                                             | NA          | NA |
| chr11 | 64004692 | 64004692 | C   | T   | exonic       | VEGFB        | synonymous SNV       | I3733:exon5:c.C408T:p.D136D,VEGFB:NM_003377:exon5  | ID=COSM147267;OCCURENCE=1(stomach)             | rs12366035  | NA |
| chr11 | 65143541 | 65143543 | AAA | -   | UTR3         | SLC25A45     | NA                   | NA                                                 | NA                                             | NA          | NA |
| chr11 | 66393069 | 66393069 | G   | C   | exonic       | RBM14        | synonymous SNV       | RBM14:NM_006328:exon2:c.G1722C:p.P574P             | NA                                             | NA          | NA |
| chr11 | 70281360 | 70281362 | TTT | -   | UTR3         | CTTN         | NA                   | NA                                                 | NA                                             | rs71992777  | NA |
| chr11 | 71238760 | 71238760 | A   | C   | exonic       | KRTAP5-7     | synonymous SNV       | KRTAP5-7:NM_001012503:exon1:c.A414C:p.S138S        | NA                                             | NA          | NA |
| chr11 | 71708250 | 71708251 | GT  | -   | UTR3         | RNF121       | NA                   | NA                                                 | NA                                             | rs3841467   | NA |
| chr11 | 71715015 | 71715015 | -   | G   | exonic       | NUMA1        | frameshift insertion | NUMA1:NM_006185:exon26:c.6254_6255insC:p.R2085fs   | NA                                             | NA          | NA |
| chr11 | 73472134 | 73472134 | A   | C   | UTR5         | RAB6A        | NA                   | NA                                                 | NA                                             | rs6592533   | NA |
| chr11 | 89701844 | 89701844 | T   | C   | exonic       | TRIM64       | nonsynonymous SNV    | TRIM64:NM_001136486:exon1:c.T173C:p.I58T           | NA                                             | rs145750208 | NA |
| chr11 | 94803548 | 94803548 | G   | A   | UTR3         | SRSF8        | NA                   | NA                                                 | NA                                             | rs201925344 | NA |
| chr11 | 1.01E+08 | 1.01E+08 | T   | G   | exonic       | PGR          | synonymous SNV       | I21P,PGR:NM_001202474:exon1:c.A771C:p.P257P,PGR:N  | NA                                             | NA          | NA |
| chr11 | 1.02E+08 | 1.02E+08 | T   | A   | UTR3         | KIAA1377     | NA                   | NA                                                 | NA                                             | NA          | NA |
| chr11 | 1.03E+08 | 1.03E+08 | T   | G   | UTR3         | DCUN1D5      | NA                   | NA                                                 | NA                                             | NA          | NA |

|       |          |          |          |     |              |                  |                   |                                                     |    |             |    |
|-------|----------|----------|----------|-----|--------------|------------------|-------------------|-----------------------------------------------------|----|-------------|----|
| chr11 | 1.03E+08 | 1.03E+08 | T        | C   | exonic       | DYNC2H1          | synonymous SNV    | on83:c.T12096C:p.D4032D,DYNC2H1:NM_001080463:exc    | NA | rs2566913   | NA |
| chr11 | 1.06E+08 | 1.06E+08 | A        | C   | UTR3         | GRIA4            | NA                | NA                                                  | NA | rs188861527 | NA |
| chr11 | 1.08E+08 | 1.08E+08 | CA       | CGA | UTR3         | SLC35F2          | NA                | NA                                                  | NA | NA          | NA |
| chr11 | 1.08E+08 | 1.08E+08 | A        | C   | UTR3         | SLC35F2          | NA                | NA                                                  | NA | rs111576438 | NA |
| chr11 | 1.1E+08  | 1.1E+08  | A        | -   | UTR3         | ARHGAP20         | NA                | NA                                                  | NA | rs35306856  | NA |
| chr11 | 1.12E+08 | 1.12E+08 | G        | T   | UTR3         | C11orf57         | NA                | NA                                                  | NA | NA          | NA |
| chr11 | 1.13E+08 | 1.13E+08 | C        | T   | UTR3         | NCAM1            | NA                | NA                                                  | NA | NA          | NA |
| chr11 | 1.18E+08 | 1.18E+08 | CA       | -   | UTR3         | FXYP6            | NA                | NA                                                  | NA | rs57385031  | NA |
| chr11 | 1.19E+08 | 1.19E+08 | A        | C   | UTR3         | DDX6             | NA                | NA                                                  | NA | NA          | NA |
| chr11 | 1.2E+08  | 1.2E+08  | C        | T   | UTR3         | POU2F3           | NA                | NA                                                  | NA | rs4938797   | NA |
| chr11 | 1.22E+08 | 1.22E+08 | -        | A   | ncRNA_exonic | MIR100HG         | NA                | NA                                                  | NA | NA          | NA |
| chr11 | 1.26E+08 | 1.26E+08 | C        | A   | exonic       | CDON             | stopgain SNV      | 43597:exon6:c.G928T;p.E310X,CDON:NM_016952:exon6:   | NA | NA          | NA |
| chr12 | 863076   | 863076   | T        | C   | exonic       | WNK1             | synonymous SNV    | l4823:exon1:c.T345C:p.A115A,WNK1:NM_018979:exon1:   | NA | NA          | NA |
| chr12 | 1021912  | 1021912  | C        | -   | UTR3         | RAD52            | NA                | NA                                                  | NA | rs71441627  | NA |
| chr12 | 3048755  | 3048755  | A        | G   | UTR3         | TULP3            | NA                | NA                                                  | NA | rs11062424  | NA |
| chr12 | 5021439  | 5021439  | G        | T   | exonic       | KCNA1            | nonsynonymous SNV | KCNA1:NM_000217:exon2:c.G895T:p.V299F               | NA | NA          | D  |
| chr12 | 8353374  | 8353374  | G        | A   | ncRNA_exonic | FAM66C           | NA                | NA                                                  | NA | rs200171719 | NA |
| chr12 | 8927164  | 8927164  | G        | T   | UTR3         | RIMKLB           | NA                | NA                                                  | NA | NA          | NA |
| chr12 | 9446339  | 9446339  | C        | T   | ncRNA_exonic | LOC642846        | NA                | NA                                                  | NA | rs202101079 | NA |
| chr12 | 9800777  | 9800777  | T        | G   | ncRNA_exonic | LOC374443        | NA                | NA                                                  | NA | NA          | NA |
| chr12 | 9849140  | 9849145  | AAAGTA   | -   | UTR3         | CLEC2D           | NA                | NA                                                  | NA | rs150209689 | NA |
| chr12 | 11420895 | 11420895 | C        | T   | exonic       | PRB3             | synonymous SNV    | PRB3:NM_006249:exon3:c.G288A:p.P96P                 | NA | NA          | NA |
| chr12 | 11421004 | 11421004 | C        | G   | exonic       | PRB3             | nonsynonymous SNV | PRB3:NM_006249:exon3:c.G179C:p.R60P                 | NA | rs71455364  | NA |
| chr12 | 11461440 | 11461440 | T        | C   | exonic       | PRB4             | synonymous SNV    | PRB4:NM_002723:exon3:c.A477G:p.P159P                | NA | NA          | NA |
| chr12 | 11461444 | 11461444 | T        | G   | exonic       | PRB4             | nonsynonymous SNV | PRB4:NM_002723:exon3:c.A473C:p.H158P                | NA | rs59774427  | NA |
| chr12 | 11461490 | 11461490 | T        | C   | exonic       | PRB4             | nonsynonymous SNV | PRB4:NM_002723:exon3:c.A427G:p.R143G                | NA | rs113771252 | NA |
| chr12 | 11461738 | 11461738 | G        | C   | exonic       | PRB4             | nonsynonymous SNV | 261399:exon3:c.C179G:p.P60R,PRB4:NM_002723:exon3:c: | NA | rs79562958  | NA |
| chr12 | 11546258 | 11546258 | G        | T   | exonic       | PRB2             | nonsynonymous SNV | PRB2:NM_006248:exon3:c.C754A:p.Q252K                | NA | NA          | NA |
| chr12 | 12045145 | 12045146 | TT       | -   | ncRNA_UTR3   | ETV6             | NA                | NA                                                  | NA | NA          | NA |
| chr12 | 19529083 | 19529083 | A        | -   | UTR3         | PLEKHA5          | NA                | NA                                                  | NA | NA          | NA |
| chr12 | 22839786 | 22839793 | TTTTTTTT | -   | UTR3         | ETNK1            | NA                | NA                                                  | NA | rs57569708  | NA |
| chr12 | 39047480 | 39047480 | C        | A   | UTR3         | CPNE8            | NA                | NA                                                  | NA | NA          | NA |
| chr12 | 50017647 | 50017647 | T        | G   | intronic     | PRPF40B          | NA                | NA                                                  | NA | NA          | NA |
| chr12 | 50017657 | 50017657 | T        | G   | intronic     | PRPF40B          | NA                | NA                                                  | NA | NA          | NA |
| chr12 | 50745739 | 50745739 | A        | G   | exonic       | FAM186A          | nonsynonymous SNV | FAM186A:NM_001145475:exon4:c.T4876C:p.S1626P        | NA | NA          | NA |
| chr12 | 50746927 | 50746927 | T        | G   | exonic       | FAM186A          | nonsynonymous SNV | FAM186A:NM_001145475:exon4:c.A3688C:p.T1230P        | NA | NA          | NA |
| chr12 | 50747248 | 50747248 | A        | G   | exonic       | FAM186A          | nonsynonymous SNV | FAM186A:NM_001145475:exon4:c.T3367C:p.F1123L        | NA | NA          | NA |
| chr12 | 51891648 | 51891648 | C        | A   | intronic     | SLC4A8           | NA                | NA                                                  | NA | NA          | NA |
| chr12 | 52374856 | 52374856 | T        | G   | exonic       | ACVR1B           | synonymous SNV    | 228G,ACVR1B:NM_020327:exon4:c.T528G:p.G176G,ACVF    | NA | NA          | NA |
| chr12 | 52845601 | 52845601 | C        | T   | exonic       | KRT6B            | nonsynonymous SNV | KRT6B:NM_005555:exon1:c.G262A:p.G88R                | NA | rs201122967 | NA |
| chr12 | 52845665 | 52845665 | G        | T   | exonic       | KRT6B            | synonymous SNV    | KRT6B:NM_005555:exon1:c.C198A:p.G66G                | NA | rs141114189 | NA |
| chr12 | 53162729 | 53162729 | A        | C   | exonic       | KRT76            | nonsynonymous SNV | KRT76:NM_015848:exon9:c.T1685G:p.V562G              | NA | NA          | NA |
| chr12 | 53810134 | 53810135 | TT       | -   | UTR3         | SP1              | NA                | NA                                                  | NA | NA          | NA |
| chr12 | 54943322 | 54943322 | A        | G   | UTR5         | PDE1B            | NA                | NA                                                  | NA | NA          | NA |
| chr12 | 54943340 | 54943340 | A        | G   | UTR5         | PDE1B            | NA                | NA                                                  | NA | NA          | NA |
| chr12 | 54943354 | 54943354 | A        | G   | UTR5         | PDE1B            | NA                | NA                                                  | NA | NA          | NA |
| chr12 | 56810470 | 56810470 | G        | T   | UTR3         | TIMELESS         | NA                | NA                                                  | NA | NA          | NA |
| chr12 | 57487230 | 57487230 | C        | A   | exonic       | NAB2             | nonsynonymous SNV | NAB2:NM_005967:exon6:c.C1317A:p.D439E               | NA | NA          | NA |
| chr12 | 58146158 | 58146158 | G        | T   | UTR5         | CDK4             | NA                | NA                                                  | NA | NA          | NA |
| chr12 | 58146161 | 58146161 | G        | T   | UTR5         | CDK4             | NA                | NA                                                  | NA | NA          | NA |
| chr12 | 64541138 | 64541138 | A        | C   | UTR3         | SRGAP1           | NA                | NA                                                  | NA | NA          | NA |
| chr12 | 64541205 | 64541205 | A        | C   | UTR3         | SRGAP1           | NA                | NA                                                  | NA | NA          | NA |
| chr12 | 66218519 | 66218519 | C        | G   | ncRNA_UTR5   | HMGA2            | NA                | NA                                                  | NA | rs12425965  | NA |
| chr12 | 70214497 | 70214497 | G        | T   | UTR3         | RAB3IP           | NA                | NA                                                  | NA | rs11177881  | NA |
| chr12 | 72079926 | 72079926 | T        | G   | UTR5         | TMEM19           | NA                | NA                                                  | NA | NA          | NA |
| chr12 | 89914886 | 89914886 | A        | T   | UTR3         | 1LNT4,POC1B-GALN | NA                | NA                                                  | NA | rs10745507  | NA |
| chr12 | 96361580 | 96361580 | G        | T   | exonic       | AMDHD1           | stopgain SNV      | AMDHD1:NM_152435:exon9:c.G1240T:p.E414X             | NA | NA          | NA |
| chr12 | 1.01E+08 | 1.01E+08 | -        | T   | UTR3         | SLC17A8          | NA                | NA                                                  | NA | NA          | NA |
| chr12 | 1.07E+08 | 1.07E+08 | T        | -   | UTR3         | CKAP4            | NA                | NA                                                  | NA | rs71442016  | NA |
| chr12 | 1.09E+08 | 1.09E+08 | C        | G   | exonic       | TMEM119          | synonymous SNV    | TMEM119:NM_181724:exon2:c.G180C:p.P60P              | NA | NA          | NA |
| chr12 | 1.09E+08 | 1.09E+08 | T        | G   | exonic       | TMEM119          | synonymous SNV    | TMEM119:NM_181724:exon2:c.A168C:p.P56P              | NA | NA          | NA |
| chr12 | 1.09E+08 | 1.09E+08 | C        | G   | exonic       | TMEM119          | synonymous SNV    | TMEM119:NM_181724:exon2:c.G165C:p.P55P              | NA | NA          | NA |

|       |          |          |           |           |              |            |                   |                                                                                           |    |             |    |
|-------|----------|----------|-----------|-----------|--------------|------------|-------------------|-------------------------------------------------------------------------------------------|----|-------------|----|
| chr12 | 1.14E+08 | 1.14E+08 | T         | G         | exonic       | TPCN1      | nonsynonymous SNV | exon18:c.T1463G:p.V488G,TPCN1:NM_001143819:exon1                                          | NA | NA          | P  |
| chr12 | 1.17E+08 | 1.17E+08 | T         | A         | ncRNA_exonic | LINC00173  | NA                | NA                                                                                        | NA | NA          | NA |
| chr12 | 1.18E+08 | 1.18E+08 | TGCTCTGC  | -         | UTR3         | KSR2       | NA                | NA                                                                                        | NA | NA          | NA |
| chr12 | 1.2E+08  | 1.2E+08  | G         | A         | UTR3         | CIT        | NA                | NA                                                                                        | NA | rs139790082 | NA |
| chr12 | 1.21E+08 | 1.21E+08 | G         | A         | UTR3         | MSI1       | NA                | NA                                                                                        | NA | NA          | NA |
| chr12 | 1.21E+08 | 1.21E+08 | C         | T         | UTR3         | MSI1       | NA                | NA                                                                                        | NA | NA          | NA |
| chr12 | 1.29E+08 | 1.29E+08 | G         | A         | intronic     | SLC15A4    | NA                | NA                                                                                        | NA | rs200176633 | NA |
| chr12 | 1.33E+08 | 1.33E+08 | C         | A         | exonic       | ANKLE2     | nonsynonymous SNV | ANKLE2:NM_015114:exon13:c.G2619T:p.W873C                                                  | NA | NA          | D  |
| chr12 | 1.34E+08 | 1.34E+08 | A         | C         | UTR3         | ZNF268     | NA                | NA                                                                                        | NA | NA          | NA |
| chr12 | 1.34E+08 | 1.34E+08 | A         | C         | UTR3         | ZNF268     | NA                | NA                                                                                        | NA | NA          | NA |
| chr13 | 19428581 | 19428581 | T         | -         | ncRNA_exonic | ANKRD20A9P | NA                | NA                                                                                        | NA | NA          | NA |
| chr13 | 19436148 | 19436148 | C         | G         | ncRNA_exonic | ANKRD20A9P | NA                | NA                                                                                        | NA | rs112815656 | NA |
| chr13 | 19436179 | 19436179 | A         | G         | ncRNA_exonic | ANKRD20A9P | NA                | NA                                                                                        | NA | rs112011321 | NA |
| chr13 | 25875755 | 25875755 | A         | C         | UTR5         | NUPL1      | NA                | NA                                                                                        | NA | NA          | NA |
| chr13 | 28867509 | 28867509 | C         | T         | UTR3         | PAN3       | NA                | NA                                                                                        | NA | NA          | NA |
| chr13 | 28874659 | 28874664 | CACACA    | -         | UTR3         | FLT1       | NA                | NA                                                                                        | NA | rs147176157 | NA |
| chr13 | 30780063 | 30780100 | ITGTGTGTG | -         | UTR3         | KATNAL1    | NA                | NA                                                                                        | NA | NA          | NA |
| chr13 | 49852512 | 49852512 | G         | T         | exonic       | CDADC1     | nonsynonymous SNV | 478:exon7:c.G1077T:p.M359I,CDADC1:NM_030911:exor                                          | NA | NA          | D  |
| chr13 | 58209060 | 58209060 | T         | C         | exonic       | PCDH17     | nonsynonymous SNV | PCDH17:NM_001040429:exon1:c.T2380C:p.S794P                                                | NA | NA          | D  |
| chr13 | 66878392 | 66878392 | C         | A         | UTR3         | PCDH9      | NA                | NA                                                                                        | NA | rs200806980 | NA |
| chr13 | 75861158 | 75861158 | C         | A         | exonic       | TBC1D4     | nonsynonymous SNV | TBC1D4:NM_014832:exon21:c.G3667T:p.A1223S                                                 | NA | NA          | B  |
| chr13 | 84455886 | 84455886 | G         | A         | UTR5         | SLITRK1    | NA                | NA                                                                                        | NA | rs202038566 | NA |
| chr13 | 96485306 | 96485306 | C         | A         | exonic       | UGGT2      | nonsynonymous SNV | UGGT2:NM_020121:exon38:c.G4403T:p.C1468F                                                  | NA | NA          | D  |
| chr13 | 1.01E+08 | 1.01E+08 | -         | T         | UTR3         | ZIC2       | NA                | NA                                                                                        | NA | rs34544768  | NA |
| chr13 | 1.04E+08 | 1.04E+08 | -         | T         | ncRNA_exonic | METTL21EP  | NA                | NA                                                                                        | NA | rs34557658  | NA |
| chr13 | 1.07E+08 | 1.07E+08 | A         | -         | UTR3         | ARGLU1     | NA                | NA                                                                                        | NA | NA          | NA |
| chr13 | 1.09E+08 | 1.09E+08 | GA        | -         | UTR5         | FAM155A    | NA                | NA                                                                                        | NA | rs35939139  | NA |
| chr13 | 1.14E+08 | 1.14E+08 | C         | A         | exonic       | F10        | nonsynonymous SNV | F10:NM_000504:exon1:c.C7A:p.R3S                                                           | NA | NA          | P  |
| chr14 | 22102293 | 22102293 | C         | T         | exonic       | OR10G2     | nonsynonymous SNV | OR10G2:NM_001005466:exon1:c.G706A:p.A236T                                                 | NA | rs41307110  | B  |
| chr14 | 23518270 | 23518270 | C         | A         | exonic       | CDH24      | synonymous SNV    | 35:exon11:c.G1812T:p.L604L,CDH24:NM_022478:exon12:                                        | NA | NA          | NA |
| chr14 | 45397887 | 45397887 | T         | -         | UTR3         | KLHL28     | NA                | NA                                                                                        | NA | NA          | NA |
| chr14 | 47310822 | 47310822 | T         | C         | UTR3         | MDGA2      | NA                | NA                                                                                        | NA | NA          | NA |
| chr14 | 50712980 | 50712980 | A         | G         | UTR3         | L2HGDH     | NA                | NA                                                                                        | NA | rs74541550  | NA |
| chr14 | 55494090 | 55494090 | G         | A         | UTR5         | SOCS4      | NA                | NA                                                                                        | NA | rs77678033  | NA |
| chr14 | 55494091 | 55494091 | G         | A         | UTR5         | SOCS4      | NA                | NA                                                                                        | NA | rs77911976  | NA |
| chr14 | 57114800 | 57114800 | A         | -         | UTR3         | TMEM260    | NA                | NA                                                                                        | NA | NA          | NA |
| chr14 | 59835968 | 59835968 | C         | A         | UTR3         | DAAM1      | NA                | NA                                                                                        | NA | rs74057123  | NA |
| chr14 | 59954397 | 59954397 | C         | A         | exonic       | JKAMP      | stopgain SNV      | 098625:exon3:c.C84A:p.C28X,JKAMP:NM_016475:exon3:                                         | NA | NA          | NA |
| chr14 | 60759368 | 60759368 | T         | -         | UTR3         | PPM1A      | NA                | NA                                                                                        | NA | NA          | NA |
| chr14 | 61112736 | 61112737 | TT        | -         | UTR3         | SIX1       | NA                | NA                                                                                        | NA | NA          | NA |
| chr14 | 65215655 | 65215655 | T         | -         | UTR3         | SPTB       | NA                | NA                                                                                        | NA | rs140208257 | NA |
| chr14 | 67852376 | 67852376 | T         | -         | UTR3         | EIF2S1     | NA                | NA                                                                                        | NA | rs71727390  | NA |
| chr14 | 73137344 | 73137345 | TC        | -         | UTR3         | DPF3       | NA                | NA                                                                                        | NA | NA          | NA |
| chr14 | 77599159 | 77599159 | -         | TCTCACAC/ | UTR3         | ZDHC22     | NA                | NA                                                                                        | NA | NA          | NA |
| chr14 | 78045446 | 78045446 | C         | A         | exonic       | SPTLC2     | nonsynonymous SNV | SPTLC2:NM_004863:exon3:c.G334T:p.V112L                                                    | NA | NA          | B  |
| chr14 | 89627942 | 89627942 | C         | T         | UTR3         | FOXP3      | NA                | NA                                                                                        | NA | rs7156172   | NA |
| chr14 | 89627946 | 89627946 | C         | T         | UTR3         | FOXP3      | NA                | NA                                                                                        | NA | NA          | NA |
| chr14 | 92527592 | 92527592 | A         | -         | UTR3         | ATXN3      | NA                | NA                                                                                        | NA | rs201936460 | NA |
| chr14 | 95655320 | 95655320 | A         | -         | UTR3         | CLMN       | NA                | NA                                                                                        | NA | NA          | NA |
| chr14 | 1.03E+08 | 1.03E+08 | A         | C         | UTR3         | RCOR1      | NA                | NA                                                                                        | NA | NA          | NA |
| chr14 | 1.03E+08 | 1.03E+08 | A         | C         | UTR3         | RCOR1      | NA                | NA                                                                                        | NA | NA          | NA |
| chr14 | 1.03E+08 | 1.03E+08 | T         | C         | UTR3         | RCOR1      | NA                | NA                                                                                        | NA | NA          | NA |
| chr14 | 1.05E+08 | 1.05E+08 | T         | C         | exonic       | AHNAK2     | synonymous SNV    | AHNAK2:NM_138420:exon7:c.A9513G:p.P3171P                                                  | NA | rs2819427   | NA |
| chr14 | 1.05E+08 | 1.05E+08 | A         | G         | exonic       | AHNAK2     | nonsynonymous SNV | AHNAK2:NM_138420:exon7:c.T6326C:p.V2109A                                                  | NA | rs201948776 | NA |
| chr14 | 1.05E+08 | 1.05E+08 | T         | C         | exonic       | AHNAK2     | nonsynonymous SNV | AHNAK2:NM_138420:exon7:c.A6145G:p.T2049A                                                  | NA | rs201406401 | NA |
| chr14 | 1.06E+08 | 1.06E+08 | C         | T         | ncRNA_exonic | KIAA0125   | NA                | NA                                                                                        | NA | rs11850004  | NA |
| chr15 | 21071781 | 21071781 | A         | G         | UTR5         | POTEB      | NA                | NA                                                                                        | NA | NA          | NA |
| chr15 | 21940266 | 21940266 | -         | A         | ncRNA_exonic | LOC646214  | NA                | NA                                                                                        | NA | NA          | NA |
| chr15 | 22742718 | 22742718 | T         | A         | exonic       | GOLGA6L1   | nonsynonymous SNV | GOLGA6L1:NM_001001413:exon8:c.T1103A:p.L368Q ID=COSM230296;OCCURENCE=1(NS),2(endometrium) | NA | rs7171381   | NA |
| chr15 | 23377464 | 23377464 | T         | C         | ncRNA_exonic | HERC2P2    | NA                | NA                                                                                        | NA | rs2920545   | NA |
| chr15 | 28518112 | 28518112 | C         | A         | exonic       | HERC2      | nonsynonymous SNV | HERC2:NM_004667:exon8:c.G839T:p.S280I                                                     | NA | rs200859595 | B  |
| chr15 | 31664441 | 31664441 | T         | C         | exonic       | KLF13      | nonsynonymous SNV | KLF13:NM_015995:exon2:c.T806C:p.L269P                                                     | NA | NA          | NA |



|       |          |          |           |   |              |                   |                        |                                                    |                                 |             |    |
|-------|----------|----------|-----------|---|--------------|-------------------|------------------------|----------------------------------------------------|---------------------------------|-------------|----|
| chr15 | 40655873 | 40655873 | G         | C | exonic       | DISP2             | nonsynonymous SNV      | DISP2:NM_033510:exon2:c.G167C:p.C56S               | NA                              | rs1898882   | D  |
| chr15 | 41871513 | 41871513 | T         | A | UTR3         | TYRO3             | NA                     | NA                                                 | NA                              | NA          | NA |
| chr15 | 43652835 | 43652835 | A         | - | UTR3         | ZSCAN29           | NA                     | NA                                                 | NA                              | rs67982601  | NA |
| chr15 | 48065010 | 48065010 | A         | C | UTR3         | SEMA6D            | NA                     | NA                                                 | NA                              | rs56345741  | NA |
| chr15 | 50643858 | 50643865 | GAGGGAGC  | - | ncRNA_exonic | FLJ10038          | NA                     | NA                                                 | NA                              | rs146731069 | NA |
| chr15 | 52413807 | 52413807 | -         | T | UTR3         | GNB5              | NA                     | NA                                                 | NA                              | NA          | NA |
| chr15 | 55904895 | 55904895 | A         | T | UTR3         | PRTG              | NA                     | NA                                                 | NA                              | NA          | NA |
| chr15 | 57840202 | 57840202 | T         | - | UTR3         | CGNL1             | NA                     | NA                                                 | NA                              | NA          | NA |
| chr15 | 68594394 | 68594423 | iTGTGTGTG | - | UTR3         | ITGA11            | NA                     | NA                                                 | NA                              | NA          | NA |
| chr15 | 70341342 | 70341342 | A         | - | UTR3         | TLE3              | NA                     | NA                                                 | NA                              | NA          | NA |
| chr15 | 70341854 | 70341854 | A         | - | UTR3         | TLE3              | NA                     | NA                                                 | NA                              | rs11324999  | NA |
| chr15 | 72452675 | 72452677 | AAA       | - | UTR3         | GRAMD2            | NA                     | NA                                                 | NA                              | NA          | NA |
| chr15 | 72958366 | 72958366 | T         | G | exonic       | GOLGA6B           | nonsynonymous SNV      | GOLGA6B:NM_018652:exon17:c.T1851G:p.H617Q          | NA                              | rs200655139 | NA |
| chr15 | 82634574 | 82634574 | C         | T | UTR3         | GOLGA6L10         | NA                     | NA                                                 | NA                              | rs28482898  | NA |
| chr15 | 82634594 | 82634594 | A         | G | UTR3         | GOLGA6L10         | NA                     | NA                                                 | NA                              | rs4039143   | NA |
| chr15 | 82637315 | 82637315 | C         | T | exonic       | GOLGA6L10         | synonymous SNV         | GOLGA6L10:NM_001164465:exon6:c.G771A:p.L257L       | NA                              | rs200605893 | NA |
| chr15 | 82637377 | 82637377 | G         | A | exonic       | GOLGA6L10         | nonsynonymous SNV      | GOLGA6L10:NM_001164465:exon6:c.C709T:p.R237C       | NA                              | rs200328108 | NA |
| chr15 | 82637378 | 82637378 | T         | C | exonic       | GOLGA6L10         | synonymous SNV         | GOLGA6L10:NM_001164465:exon6:c.A708G:p.L236L       | NA                              | NA          | NA |
| chr15 | 82637419 | 82637419 | A         | G | exonic       | GOLGA6L10         | nonsynonymous SNV      | GOLGA6L10:NM_001164465:exon6:c.T667C:p.C223R       | NA                              | NA          | NA |
| chr15 | 82637420 | 82637420 | C         | T | exonic       | GOLGA6L10         | synonymous SNV         | GOLGA6L10:NM_001164465:exon6:c.G666A:p.L222L       | NA                              | NA          | NA |
| chr15 | 83013917 | 83013917 | C         | T | intergenic   | ist=27490),UBE2Q2 | NA                     | NA                                                 | NA                              | NA          | NA |
| chr15 | 83502439 | 83502439 | T         | - | UTR3         | WHAMM             | NA                     | NA                                                 | NA                              | NA          | NA |
| chr15 | 85053033 | 85053033 | C         | T | ncRNA_exonic | GOLGA6L5          | NA                     | NA                                                 | NA                              | NA          | NA |
| chr15 | 85185301 | 85185301 | G         | A | ncRNA_exonic | SCAND2P           | NA                     | NA                                                 | NA                              | rs147659526 | NA |
| chr15 | 89398883 | 89398883 | A         | T | exonic       | ACAN              | nonsynonymous SNV      | :exon12:c.A3067T:p.T1023S,ACAN:NM_013227:exon12:c  | NA                              | NA          | NA |
| chr15 | 90349667 | 90349667 | T         | G | exonic       | ANPEP             | nonsynonymous SNV      | ANPEP:NM_001150:exon2:c.A148C:p.T50P               | NA                              | NA          | B  |
| chr15 | 91425783 | 91425783 | T         | C | UTR3         | FURIN             | NA                     | NA                                                 | NA                              | NA          | NA |
| chr15 | 92690366 | 92690366 | A         | C | exonic       | SLCO3A1           | synonymous SNV         | 5044:exon8:c.A1665C:p.T555T,SLCO3A1:NM_013272:exo  | NA                              | NA          | NA |
| chr15 | 96881005 | 96881005 | A         | - | UTR3         | NR2F2             | NA                     | NA                                                 | NA                              | rs34678417  | NA |
| chr15 | 98981194 | 98981196 | GAT       | - | UTR3         | FAM169B           | NA                     | NA                                                 | NA                              | NA          | NA |
| chr15 | 98981251 | 98981253 | GAT       | - | UTR3         | FAM169B           | NA                     | NA                                                 | NA                              | NA          | NA |
| chr15 | 98981261 | 98981263 | GGA       | - | UTR3         | FAM169B           | NA                     | NA                                                 | NA                              | NA          | NA |
| chr15 | 98981290 | 98981290 | T         | - | UTR3         | FAM169B           | NA                     | NA                                                 | NA                              | NA          | NA |
| chr15 | 1E+08    | 1E+08    | CAGCAG    | - | exonic       | MEF2A             | nonframeshift deletion | 1EF2A:NM_001130927:exon10:c.1048_1053del:p.350_35  | NA                              | NA          | NA |
| chr16 | 449109   | 449109   | A         | G | exonic       | NME4              | nonsynonymous SNV      | NME4:NM_005009:exon2:c.A211G:p.M71V                | NA                              | NA          | D  |
| chr16 | 822742   | 822742   | T         | G | intergenic   | st=2465),RPU5D1(d | NA                     | NA                                                 | NA                              | NA          | NA |
| chr16 | 848213   | 848213   | T         | G | UTR3         | GNG13             | NA                     | NA                                                 | NA                              | NA          | NA |
| chr16 | 1036733  | 1036733  | C         | T | UTR3         | SOX8              | NA                     | NA                                                 | NA                              | NA          | NA |
| chr16 | 1258193  | 1258193  | A         | C | exonic       | CACNA1H           | nonsynonymous SNV      | 17:exon16:c.A3335C:p.D1112A,CACNA1H:NM_021098:exc  | NA                              | rs202114960 | NA |
| chr16 | 1291608  | 1291608  | A         | G | exonic       | TPSAB1            | nonsynonymous SNV      | TPSAB1:NM_003294:exon4:c.A407G:p.H136R             | NA                              | rs1064780   | B  |
| chr16 | 1306802  | 1306802  | A         | G | exonic       | TPSD1             | nonsynonymous SNV      | TPSD1:NM_012217:exon3:c.A259G:p.I87V               | NA                              | rs2401930   | B  |
| chr16 | 1306817  | 1306817  | G         | A | exonic       | TPSD1             | nonsynonymous SNV      | TPSD1:NM_012217:exon3:c.G274A:p.A92T               | ID=COSM226769;OCCURENCE=1(skin) | rs1141968   | B  |
| chr16 | 1414996  | 1414996  | T         | - | UTR3         | UNKL              | NA                     | NA                                                 | NA                              | rs112378427 | NA |
| chr16 | 1591962  | 1591962  | G         | A | exonic       | TMEM204           | synonymous SNV         | 0:exon2:c.G321A:p.T107T,TMEM204:NM_001256541:ex    | NA                              | rs2076443   | NA |
| chr16 | 1878295  | 1878295  | G         | A | UTR3         | FAHD1             | NA                     | NA                                                 | NA                              | NA          | NA |
| chr16 | 2052345  | 2052345  | T         | G | exonic       | ZNF598            | nonsynonymous SNV      | ZNF598:NM_178167:exon7:c.A757C:p.T253P             | NA                              | NA          | NA |
| chr16 | 2121850  | 2121850  | -         | C | exonic       | TSC2              | frameshift insertion   | 5C2:NM_001077183:exon19:c.2012_2013insC:p.G671fs,T | NA                              | NA          | NA |
| chr16 | 3077670  | 3077670  | A         | C | UTR3         | THOC6             | NA                     | NA                                                 | NA                              | NA          | NA |
| chr16 | 3703880  | 3703880  | C         | T | UTR5         | DNASE1            | NA                     | NA                                                 | NA                              | rs77563984  | NA |
| chr16 | 3703881  | 3703881  | C         | G | UTR5         | DNASE1            | NA                     | NA                                                 | NA                              | rs79356805  | NA |
| chr16 | 15818992 | 15818992 | A         | - | UTR3         | NDE1              | NA                     | NA                                                 | NA                              | NA          | NA |
| chr16 | 16367669 | 16367669 | T         | A | exonic       | NOMO3             | nonsynonymous SNV      | NOMO3:NM_001004067:exon19:c.T2178A:p.N726K         | NA                              | rs370986    | B  |
| chr16 | 19131760 | 19131760 | T         | - | UTR3         | ITPRIPL2          | NA                     | NA                                                 | NA                              | rs112434410 | NA |
| chr16 | 19513697 | 19513702 | TTTTTT    | - | UTR3         | GDE1              | NA                     | NA                                                 | NA                              | NA          | NA |
| chr16 | 19563849 | 19563851 | AAA       | - | UTR3         | CCP110            | NA                     | NA                                                 | NA                              | NA          | NA |
| chr16 | 22546469 | 22546469 | A         | C | exonic       | LOC100132247      | nonsynonymous SNV      | LOC100132247:NM_001135865:exon7:c.A2165C:p.H722F   | NA                              | NA          | NA |
| chr16 | 23073703 | 23073703 | A         | T | UTR3         | USP31             | NA                     | NA                                                 | NA                              | rs8063453   | NA |
| chr16 | 23076644 | 23076644 | A         | - | UTR3         | USP31             | NA                     | NA                                                 | NA                              | NA          | NA |
| chr16 | 27080038 | 27080038 | T         | - | UTR3         | C16orf82          | NA                     | NA                                                 | NA                              | NA          | NA |
| chr16 | 29821984 | 29821984 | T         | - | UTR3         | MAZ               | NA                     | NA                                                 | NA                              | rs71650270  | NA |
| chr16 | 29910394 | 29910394 | A         | C | UTR5         | SEZ6L2            | NA                     | NA                                                 | NA                              | NA          | NA |
| chr16 | 55798759 | 55798759 | T         | C | ncRNA_exonic | CES1P1            | NA                     | NA                                                 | NA                              | rs71374087  | NA |

|       |          |          |          |          |              |           |                   |                                                                                                 |             |             |    |
|-------|----------|----------|----------|----------|--------------|-----------|-------------------|-------------------------------------------------------------------------------------------------|-------------|-------------|----|
| chr16 | 55798778 | 55798778 | A        | G        | ncRNA_exonic | CES1P1    | NA                | NA                                                                                              | NA          | rs76167618  | NA |
| chr16 | 55798783 | 55798783 | A        | G        | ncRNA_exonic | CES1P1    | NA                | NA                                                                                              | NA          | rs75712934  | NA |
| chr16 | 56691861 | 56691861 | T        | C        | UTR5         | MT1F      | NA                | NA                                                                                              | NA          | NA          | NA |
| chr16 | 66544113 | 66544113 | -        | A        | UTR3         | TK2       | NA                | NA                                                                                              | NA          | NA          | NA |
| chr16 | 67905065 | 67905065 | C        | T        | UTR3         | NUTF2     | NA                | NA                                                                                              | NA          | NA          | NA |
| chr16 | 68678505 | 68678505 | G        | T        | UTR5         | CDH3      | NA                | NA                                                                                              | NA          | NA          | NA |
| chr16 | 69151479 | 69151479 | -        | T        | UTR3         | HAS3      | NA                | NA                                                                                              | NA          | NA          | NA |
| chr16 | 69339663 | 69339663 | T        | -        | UTR3         | SNTB2     | NA                | NA                                                                                              | NA          | NA          | NA |
| chr16 | 70010369 | 70010369 | C        | G        | ncRNA_exonic | PDXDC2P   | NA                | NA                                                                                              | NA          | rs187431035 | NA |
| chr16 | 85125545 | 85125549 | TTTTT    | -        | UTR3         | KIAA0513  | NA                | NA                                                                                              | NA          | NA          | NA |
| chr16 | 85695241 | 85695241 | G        | A        | exonic       | GSE1      | synonymous SNV    | 4473:exon8:c.G1818A:p.S606S,GSE1:NM_014615:exon9:c                                              | NA          | NA          | NA |
| chr16 | 85695242 | 85695242 | C        | G        | exonic       | GSE1      | nonsynonymous SNV | 1473:exon8:c.C1819G:p.P607A,GSE1:NM_014615:exon9:c                                              | NA          | NA          | D  |
| chr16 | 85695243 | 85695243 | C        | G        | exonic       | GSE1      | nonsynonymous SNV | 1473:exon8:c.C1820G:p.P607R,GSE1:NM_014615:exon9:c                                              | NA          | NA          | D  |
| chr16 | 85695244 | 85695244 | C        | A        | exonic       | GSE1      | synonymous SNV    | 4473:exon8:c.C1821A:p.P607P,GSE1:NM_014615:exon9:c                                              | NA          | NA          | NA |
| chr16 | 88506287 | 88506287 | -        | TCTGACCA | UTR3         | ZNF469    | NA                | NA                                                                                              | NA          | rs3838248   | NA |
| chr16 | 89346906 | 89346906 | T        | G        | exonic       | ANKRD11   | nonsynonymous SNV | 55,ANKRD11:NM_013275:exon9:c.A6044C:p.Y2015S,ANK                                                | NA          | NA          | D  |
| chr17 | 263576   | 263576   | T        | C        | exonic       | C17orf97  | synonymous SNV    | C17orf97:NM_001013672:exon2:c.T942C:p.G314G                                                     | NA          | rs111445631 | NA |
| chr17 | 1657980  | 1657980  | G        | -        | UTR3         | SERPINF2  | NA                | NA                                                                                              | NA          | rs67887323  | NA |
| chr17 | 1683882  | 1683882  | C        | A        | UTR3         | SMYD4     | NA                | NA                                                                                              | NA          | NA          | NA |
| chr17 | 2938272  | 2938272  | T        | -        | UTR3         | RAP1GAP2  | NA                | NA                                                                                              | NA          | rs71830536  | NA |
| chr17 | 7190439  | 7190439  | T        | C        | UTR3         | SLC2A4    | NA                | NA                                                                                              | NA          | NA          | NA |
| chr17 | 7215429  | 7215429  | T        | -        | UTR3         | EIF5A     | NA                | NA                                                                                              | NA          | NA          | NA |
| chr17 | 8294348  | 8294348  | T        | -        | UTR3         | RNF222    | NA                | NA                                                                                              | NA          | NA          | NA |
| chr17 | 11513845 | 11513845 | G        | T        | exonic       | DNAH9     | nonsynonymous SNV | DNAH9:NM_001372:exon3:c.G747T:p.K249N                                                           | NA          | NA          | B  |
| chr17 | 15621245 | 15621245 | -        | T        | UTR3         | ZNF286A   | NA                | NA                                                                                              | NA          | NA          | NA |
| chr17 | 20407483 | 20407483 | T        | C        | ncRNA_exonic | KRT16P3   | NA                | NA                                                                                              | NA          | NA          | NA |
| chr17 | 20767707 | 20767707 | C        | T        | UTR3         | CCDC144NL | NA                | NA                                                                                              | NA          | NA          | NA |
| chr17 | 21203941 | 21203941 | G        | A        | exonic       | MAP2K3    | nonsynonymous SNV | 2756:exon4:c.G163A:p.A55T,MAP2K3:NM_145109:exon4                                                | NA          | rs2305873   | B  |
| chr17 | 21207844 | 21207844 | C        | T        | exonic       | MAP2K3    | synonymous SNV    | 756:exon8:c.C588T:p.A196A,MAP2K3:NM_145109:exon8                                                | NA          | rs2230436   | NA |
| chr17 | 21320854 | 21320854 | A        | -        | UTR3         | KCNJ12    | NA                | NA                                                                                              | NA          | rs67230821  | NA |
| chr17 | 21911267 | 21911268 | TG       | -        | ncRNA_exonic | FLJ36000  | NA                | NA                                                                                              | NA          | NA          | NA |
| chr17 | 31618865 | 31618865 | A        | C        | exonic       | ASIC2     | nonsynonymous SNV | ASIC2:NM_183377:exon1:c.T269G:p.V90G                                                            | NA          | NA          | NA |
| chr17 | 33765127 | 33765127 | A        | -        | UTR3         | SLFN13    | NA                | NA                                                                                              | NA          | rs11337992  | NA |
| chr17 | 34493108 | 34493108 | T        | G        | UTR3         | TBC1D3B   | NA                | NA                                                                                              | NA          | NA          | NA |
| chr17 | 36883387 | 36883387 | T        | -        | UTR3         | MLLT6     | NA                | NA                                                                                              | NA          | NA          | NA |
| chr17 | 37221649 | 37221650 | TT       | -        | ncRNA_UTR3   | PLXDC1    | NA                | NA                                                                                              | NA          | rs149203975 | NA |
| chr17 | 39254143 | 39254143 | C        | T        | exonic       | KRTAP4-8  | nonsynonymous SNV | KRTAP4-8:NM_031960:exon1:c.G194A:p.C65Y                                                         | NA          | NA          | NA |
| chr17 | 39340786 | 39340786 | A        | G        | exonic       | KRTAP4-1  | synonymous SNV    | KRTAP4-1:NM_033060:exon2:c.T264C:p.C88C                                                         | NA          | rs2320228   | NA |
| chr17 | 39675023 | 39675023 | T        | C        | exonic       | KRT15     | synonymous SNV    | KRT15:NM_002275:exon1:c.A57G:p.R19R                                                             | NA          | NA          | NA |
| chr17 | 40465420 | 40465420 | G        | -        | UTR3         | STAT3     | NA                | NA                                                                                              | NA          | NA          | NA |
| chr17 | 41144609 | 41144609 | G        | A        | UTR3         | RUNDC1    | NA                | NA                                                                                              | NA          | rs201072724 | NA |
| chr17 | 41196822 | 41196823 | TT       | -        | UTR3         | BRCA1     | NA                | NA                                                                                              | NA          | NA          | NA |
| chr17 | 42248239 | 42248239 | C        | A        | exonic       | ASB16     | synonymous SNV    | ASB16:NM_080863:exon1:c.C82A:p.R28R                                                             | NA          | rs144229400 | NA |
| chr17 | 42266708 | 42266708 | A        | G        | exonic       | TMUB2     | synonymous SNV    | 88,TMUB2:NM_177441:exon2:c.A294G:p.G98G,TMUB2:                                                  | NA          | NA          | NA |
| chr17 | 42851738 | 42851738 | T        | G        | exonic       | ADAM11    | synonymous SNV    | ADAM11:NM_002390:exon12:c.T1068G:p.G356G                                                        | NA          | NA          | NA |
| chr17 | 43101699 | 43101708 | TGTGTGTG | -        | UTR3         | DKAKD     | NA                | NA                                                                                              | NA          | NA          | NA |
| chr17 | 45214564 | 45214564 | A        | T        | exonic       | CDC27     | nonsynonymous SNV | 091:exon14:c.T1885A:p.C629S,CDC27:NM_001256:exon1D=COSM1179254,COSM1179255;OCCURENCE=1(prostate | rs201184967 | NA          | NA |
| chr17 | 45214606 | 45214606 | G        | T        | exonic       | CDC27     | nonsynonymous SNV | 91:exon14:c.C1843A:p.H615N,CDC27:NM_001256:exon1                                                | NA          | rs79260965  | NA |
| chr17 | 45214636 | 45214636 | T        | C        | exonic       | CDC27     | nonsynonymous SNV | 91:exon14:c.A1813G:p.N605D,CDC27:NM_001256:exon1                                                | NA          | rs200200993 | NA |
| chr17 | 47132506 | 47132506 | A        | T        | UTR3         | IGF2BP1   | NA                | NA                                                                                              | NA          | NA          | NA |
| chr17 | 47373330 | 47373330 | G        | A        | UTR3         | ZNF652    | NA                | NA                                                                                              | NA          | NA          | NA |
| chr17 | 47373333 | 47373333 | C        | A        | UTR3         | ZNF652    | NA                | NA                                                                                              | NA          | NA          | NA |
| chr17 | 48771502 | 48771502 | G        | A        | UTR3         | ANKRD40   | NA                | NA                                                                                              | NA          | rs11079923  | NA |
| chr17 | 48771507 | 48771507 | G        | A        | UTR3         | ANKRD40   | NA                | NA                                                                                              | NA          | rs199897066 | NA |
| chr17 | 54965932 | 54965932 | A        | G        | UTR3         | TRIM25    | NA                | NA                                                                                              | NA          | rs7615      | NA |
| chr17 | 55184422 | 55184422 | A        | C        | exonic       | AKAP1     | nonsynonymous SNV | 1P,AKAP1:NM_001242902:exon3:c.A1597C:p.T533P,AKAP                                               | NA          | rs202031778 | P  |
| chr17 | 58524282 | 58524282 | A        | -        | UTR3         | APPBP2    | NA                | NA                                                                                              | NA          | NA          | NA |
| chr17 | 60021734 | 60021734 | T        | -        | UTR3         | MED13     | NA                | NA                                                                                              | NA          | NA          | NA |
| chr17 | 61574642 | 61574642 | G        | A        | exonic       | ACE       | nonsynonymous SNV | .R664Q,ACE:NM_152830:exon14:c.G2114A:p.R705Q,ACE:                                               | NA          | rs200754517 | D  |
| chr17 | 62541835 | 62541835 | A        | -        | UTR3         | SMURF2    | NA                | NA                                                                                              | NA          | NA          | NA |
| chr17 | 73498845 | 73498845 | T        | G        | exonic       | CASKIN2   | synonymous SNV    | 543:exon17:c.A2064C:p.P688P,CASKIN2:NM_020753:exon                                              | NA          | NA          | NA |
| chr17 | 75090386 | 75090386 | T        | C        | ncRNA_exonic | LINC00338 | NA                | NA                                                                                              | NA          | NA          | NA |

|       |          |          |           |   |              |              |                        |                                                    |                                 |             |    |
|-------|----------|----------|-----------|---|--------------|--------------|------------------------|----------------------------------------------------|---------------------------------|-------------|----|
| chr17 | 75090396 | 75090396 | G         | A | ncRNA_exonic | LINC00338    | NA                     | NA                                                 | NA                              | NA          | NA |
| chr17 | 76083017 | 76083017 | A         | C | exonic       | TNRC6C       | synonymous SNV         | 40:exon14:c.A3636C:p.P1212P,TNRC6C:NM_018996:exon  | NA                              | NA          | NA |
| chr17 | 76102335 | 76102335 | A         | - | UTR3         | TNRC6C       | NA                     | NA                                                 | NA                              | rs58424290  | NA |
| chr17 | 76798445 | 76798445 | C         | A | exonic       | USP36        | nonsynonymous SNV      | USP36:NM_025090:exon17:c.G2983T:p.A995S            | NA                              | rs145562419 | B  |
| chr17 | 77807715 | 77807715 | G         | T | UTR3         | CBX4         | NA                     | NA                                                 | NA                              | NA          | NA |
| chr17 | 78326270 | 78326270 | A         | G | ncRNA_exonic | LOC100294362 | NA                     | NA                                                 | NA                              | NA          | NA |
| chr17 | 79517455 | 79517455 | A         | C | exonic       | C17orf70     | synonymous SNV         | C17orf70:NM_025161:exon3:c.T1065G:p.G355G          | ID=COSM309626;OCCURENCE=1(lung) | rs202147413 | NA |
| chr17 | 79615572 | 79615572 | A         | G | UTR3         | TSPAN10      | NA                     | NA                                                 | NA                              | rs7405453   | NA |
| chr18 | 3412167  | 3412167  | C         | T | UTR5         | TGIF1        | NA                     | NA                                                 | NA                              | rs11571505  | NA |
| chr18 | 9861101  | 9861101  | A         | - | UTR3         | RAB31        | NA                     | NA                                                 | NA                              | NA          | NA |
| chr18 | 9887252  | 9887252  | C         | A | exonic       | TXNDC2       | nonsynonymous SNV      | 38529:exon2:c.C776A:p.A259E,TXNDC2:NM_032243:exon  | NA                              | NA          | NA |
| chr18 | 31322986 | 31322986 | G         | A | exonic       | ASXL3        | synonymous SNV         | ASXL3:NM_030632:exon12:c.G3174A:p.K1058K           | NA                              | NA          | NA |
| chr18 | 42644796 | 42644796 | C         | A | UTR3         | SETBP1       | NA                     | NA                                                 | NA                              | NA          | NA |
| chr18 | 45363933 | 45363933 | A         | - | UTR3         | SMAD2        | NA                     | NA                                                 | NA                              | NA          | NA |
| chr18 | 47350146 | 47350146 | T         | C | UTR3         | MYO5B        | NA                     | NA                                                 | NA                              | NA          | NA |
| chr18 | 47350148 | 47350148 | A         | G | UTR3         | MYO5B        | NA                     | NA                                                 | NA                              | NA          | NA |
| chr18 | 48610376 | 48610376 | G         | A | UTR3         | SMAD4        | NA                     | NA                                                 | NA                              | NA          | NA |
| chr18 | 55215503 | 55215503 | C         | A | UTR3         | FECH         | NA                     | NA                                                 | NA                              | NA          | NA |
| chr18 | 61265349 | 61265349 | T         | - | UTR3         | SERPINB13    | NA                     | NA                                                 | NA                              | rs57085048  | NA |
| chr18 | 61325815 | 61325815 | A         | G | exonic       | SERPINB3     | nonsynonymous SNV      | SERPINB3:NM_006919:exon5:c.T401C:p.V134A           | NA                              | rs148254791 | B  |
| chr18 | 61325816 | 61325816 | C         | T | exonic       | SERPINB3     | nonsynonymous SNV      | SERPINB3:NM_006919:exon5:c.G400A:p.V134I           | NA                              | rs61754491  | B  |
| chr18 | 64171913 | 64171913 | A         | T | UTR3         | CDH19        | NA                     | NA                                                 | NA                              | NA          | NA |
| chr18 | 72593013 | 72593013 | A         | C | exonic       | ZNF407       | nonsynonymous SNV      | .89:exon5:c.A5066C:p.D1689A,ZNF407:NM_017757:exon  | NA                              | NA          | NA |
| chr19 | 199295   | 199295   | G         | A | ncRNA_exonic | FLJ45445     | NA                     | NA                                                 | NA                              | NA          | NA |
| chr19 | 199442   | 199442   | G         | T | ncRNA_exonic | FLJ45445     | NA                     | NA                                                 | NA                              | rs57399907  | NA |
| chr19 | 624882   | 624882   | T         | C | exonic       | POLRMT       | nonsynonymous SNV      | POLRMT:NM_005035:exon5:c.A977G:p.E326G             | NA                              | NA          | P  |
| chr19 | 1095352  | 1095352  | C         | G | UTR5         | POLR2E       | NA                     | NA                                                 | NA                              | rs17554924  | NA |
| chr19 | 1095355  | 1095355  | C         | T | UTR5         | POLR2E       | NA                     | NA                                                 | NA                              | rs17554917  | NA |
| chr19 | 1472591  | 1472591  | T         | C | UTR3         | APC2         | NA                     | NA                                                 | NA                              | NA          | NA |
| chr19 | 1472601  | 1472601  | A         | C | UTR3         | APC2         | NA                     | NA                                                 | NA                              | NA          | NA |
| chr19 | 1597572  | 1597572  | G         | T | UTR3         | UQCR11       | NA                     | NA                                                 | NA                              | NA          | NA |
| chr19 | 1925930  | 1925930  | G         | C | UTR3         | SCAMP4       | NA                     | NA                                                 | NA                              | NA          | NA |
| chr19 | 4045624  | 4045624  | C         | G | UTR3         | ZBTB7A       | NA                     | NA                                                 | NA                              | NA          | NA |
| chr19 | 4511737  | 4511737  | T         | C | exonic       | PLIN4        | synonymous SNV         | PLIN4:NM_001080400:exon3:c.A2193G:p.K731K          | NA                              | rs57610751  | NA |
| chr19 | 4512676  | 4512676  | T         | G | exonic       | PLIN4        | synonymous SNV         | PLIN4:NM_001080400:exon3:c.A1254C:p.T418T          | NA                              | rs59593546  | NA |
| chr19 | 4513044  | 4513044  | C         | T | exonic       | PLIN4        | nonsynonymous SNV      | PLIN4:NM_001080400:exon3:c.G886A:p.G296S           | NA                              | rs56366613  | NA |
| chr19 | 4523091  | 4523091  | T         | - | UTR3         | PLIN5        | NA                     | NA                                                 | NA                              | rs71168910  | NA |
| chr19 | 5915980  | 5915980  | T         | G | UTR3         | CAPS         | NA                     | NA                                                 | NA                              | NA          | NA |
| chr19 | 7965897  | 7965897  | C         | G | UTR3         | LRRC8E       | NA                     | NA                                                 | NA                              | NA          | NA |
| chr19 | 9761701  | 9761701  | C         | T | UTR3         | ZNF562       | NA                     | NA                                                 | NA                              | NA          | NA |
| chr19 | 10579172 | 10579172 | G         | C | UTR3         | PDE4A        | NA                     | NA                                                 | NA                              | NA          | NA |
| chr19 | 10579177 | 10579177 | A         | C | UTR3         | PDE4A        | NA                     | NA                                                 | NA                              | NA          | NA |
| chr19 | 11558341 | 11558346 | GAGGAG    | - | exonic       | PRKCSH       | nonframeshift deletion | 11:c.937_942del:p.313_314del,PRKCSH:NM_002743:exon | NA                              | NA          | NA |
| chr19 | 11562297 | 11562297 | C         | T | UTR3         | ELAVL3       | NA                     | NA                                                 | NA                              | NA          | NA |
| chr19 | 11563263 | 11563263 | G         | A | UTR3         | ELAVL3       | NA                     | NA                                                 | NA                              | NA          | NA |
| chr19 | 13317726 | 13317726 | A         | T | UTR3         | CACNA1A      | NA                     | NA                                                 | NA                              | NA          | NA |
| chr19 | 13317759 | 13317767 | TTTTTTTTT | - | UTR3         | CACNA1A      | NA                     | NA                                                 | NA                              | NA          | NA |
| chr19 | 17001071 | 17001071 | C         | A | exonic       | F2RL3        | nonsynonymous SNV      | F2RL3:NM_003950:exon2:c.C797A:p.A266D              | NA                              | NA          | D  |
| chr19 | 17038890 | 17038890 | C         | A | exonic       | CPAMD8       | nonsynonymous SNV      | CPAMD8:NM_015692:exon25:c.G3440T:p.S1147I          | NA                              | NA          | NA |
| chr19 | 17714607 | 17714607 | T         | - | UTR3         | UNC13A       | NA                     | NA                                                 | NA                              | NA          | NA |
| chr19 | 18260796 | 18260796 | T         | - | UTR3         | MAST3        | NA                     | NA                                                 | NA                              | rs61501122  | NA |
| chr19 | 18703077 | 18703077 | T         | C | UTR3         | C19orf60     | NA                     | NA                                                 | NA                              | rs3170474   | NA |
| chr19 | 20803652 | 20803652 | -         | T | UTR3         | ZNF626       | NA                     | NA                                                 | NA                              | rs139108386 | NA |
| chr19 | 20806673 | 20806673 | C         | T | UTR3         | ZNF626       | NA                     | NA                                                 | NA                              | NA          | NA |
| chr19 | 22363817 | 22363817 | A         | G | exonic       | ZNF676       | synonymous SNV         | ZNF676:NM_001001411:exon3:c.T702C:p.F234F          | NA                              | NA          | NA |
| chr19 | 35850711 | 35850711 | A         | G | exonic       | FFAR3        | nonsynonymous SNV      | FFAR3:NM_005304:exon2:c.A919G:p.M307V              | NA                              | rs12459836  | B  |
| chr19 | 36114999 | 36114999 | C         | T | UTR3         | HAUS5        | NA                     | NA                                                 | NA                              | NA          | NA |
| chr19 | 36135645 | 36135645 | T         | A | exonic       | ETV2         | nonsynonymous SNV      | ETV2:NM_014209:exon7:c.T920A:p.I307N               | NA                              | NA          | NA |
| chr19 | 36135646 | 36135646 | C         | G | exonic       | ETV2         | nonsynonymous SNV      | ETV2:NM_014209:exon7:c.C921G:p.I307M               | NA                              | NA          | NA |
| chr19 | 36135647 | 36135647 | G         | A | exonic       | ETV2         | nonsynonymous SNV      | ETV2:NM_014209:exon7:c.G922A:p.V308M               | NA                              | NA          | NA |
| chr19 | 36135649 | 36135649 | G         | C | exonic       | ETV2         | synonymous SNV         | ETV2:NM_014209:exon7:c.G924C:p.V308V               | NA                              | NA          | NA |
| chr19 | 36135650 | 36135650 | C         | G | exonic       | ETV2         | nonsynonymous SNV      | ETV2:NM_014209:exon7:c.C925G:p.R309G               | NA                              | NA          | NA |

|       |          |          |           |          |              |           |                   |                                                    |                                                  |             |    |
|-------|----------|----------|-----------|----------|--------------|-----------|-------------------|----------------------------------------------------|--------------------------------------------------|-------------|----|
| chr19 | 37759367 | 37759367 | C         | A        | ncRNA_exonic | LOC284412 | NA                | NA                                                 | NA                                               | rs201738321 | NA |
| chr19 | 38032097 | 38032097 | -         | A        | UTR3         | ZNF793    | NA                | NA                                                 | NA                                               | NA          | NA |
| chr19 | 38795905 | 38795905 | C         | A        | UTR3         | YIF1B     | NA                | NA                                                 | NA                                               | NA          | NA |
| chr19 | 40021823 | 40021823 | -         | T        | UTR3         | EID2B     | NA                | NA                                                 | NA                                               | NA          | NA |
| chr19 | 41515263 | 41515263 | A         | G        | exonic       | CYP2B6    | nonsynonymous SNV | CYP2B6:NM_000767:exon5:c.A785G:p.K262R             | NA                                               | rs2279343   | B  |
| chr19 | 41811707 | 41811707 | T         | C        | exonic       | HNRNPUL1  | nonsynonymous SNV | 0:exon14:c.T2389C:p.Y797H,HNRNPUL1:NM_144732:exo   | NA                                               | NA          | NA |
| chr19 | 42799307 | 42799307 | A         | C        | exonic       | CIC       | nonsynonymous SNV | CIC:NM_015125:exon20:c.A4791C:p.P1597P             | NA                                               | NA          | NA |
| chr19 | 43376101 | 43376101 | G         | T        | exonic       | PSG1      | nonsynonymous SNV | .A176E,PSG1:NM_001184826:exon3:c.C527A:p.A176E,PS  | NA                                               | NA          | NA |
| chr19 | 44117603 | 44117603 | T         | A        | exonic       | SRRM5     | nonsynonymous SNV | SRRM5:NM_001145641:exon1:c.T1330A:p.Y444N          | ID=COSM474846;OCCURENCE=1(kidney),5(endometrium) | rs201848853 | NA |
| chr19 | 45262965 | 45262965 | C         | -        | UTR3         | BCL3      | NA                | NA                                                 | NA                                               | NA          | NA |
| chr19 | 45323171 | 45323187 | CCCAACTCA | -        | UTR3         | BCAM      | NA                | NA                                                 | NA                                               | rs3842409   | NA |
| chr19 | 46052048 | 46052048 | -         | TTATTTAT | UTR3         | OPA3      | NA                | NA                                                 | NA                                               | NA          | NA |
| chr19 | 46273463 | 46273507 | AGCAGCAC  | -        | UTR3         | DMPK      | NA                | NA                                                 | NA                                               | NA          | NA |
| chr19 | 46442771 | 46442771 | G         | A        | UTR3         | NOVA2     | NA                | NA                                                 | NA                                               | NA          | NA |
| chr19 | 47278314 | 47278319 | ACACAC    | -        | UTR3         | SLC1A5    | NA                | NA                                                 | NA                                               | NA          | NA |
| chr19 | 48984071 | 48984071 | C         | G        | UTR3         | CYTH2     | NA                | NA                                                 | NA                                               | NA          | NA |
| chr19 | 54378026 | 54378027 | TT        | -        | UTR3         | MYADM     | NA                | NA                                                 | NA                                               | NA          | NA |
| chr19 | 54378031 | 54378031 | T         | C        | UTR3         | MYADM     | NA                | NA                                                 | NA                                               | NA          | NA |
| chr19 | 54725798 | 54725798 | G         | T        | exonic       | LILRB3    | nonsynonymous SNV | 31450:exon4:c.C560A:p.T187N,LILRB3:NM_006864:exon4 | ID=COSM1158374;OCCURENCE=1(pancreas)             | rs1052968   | B  |
| chr19 | 54725835 | 54725835 | G         | C        | exonic       | LILRB3    | nonsynonymous SNV | 11450:exon4:c.C523G:p.R175G,LILRB3:NM_006864:exon4 | NA                                               | rs201948566 | B  |
| chr19 | 54742303 | 54742303 | C         | T        | UTR3         | LILRA6    | NA                | NA                                                 | NA                                               | rs71365449  | NA |
| chr19 | 54818552 | 54818552 | G         | -        | UTR3         | LILRA5    | NA                | NA                                                 | NA                                               | NA          | NA |
| chr19 | 54818578 | 54818578 | G         | A        | UTR3         | LILRA5    | NA                | NA                                                 | NA                                               | NA          | NA |
| chr19 | 55286864 | 55286864 | A         | C        | exonic       | KIR2DL1   | synonymous SNV    | KIR2DL1:NM_014218:exon4:c.A618C:p.P206P            | NA                                               | rs201422291 | NA |
| chr19 | 55607307 | 55607307 | T         | G        | exonic       | PPP1R12C  | nonsynonymous SNV | l618:exon9:c.A1155C:p.E385D,PPP1R12C:NM_017607:ex  | NA                                               | NA          | P  |
| chr20 | 309179   | 309179   | T         | A        | UTR3         | SOX12     | NA                | NA                                                 | NA                                               | NA          | NA |
| chr20 | 309180   | 309180   | T         | A        | UTR3         | SOX12     | NA                | NA                                                 | NA                                               | NA          | NA |
| chr20 | 309181   | 309181   | T         | G        | UTR3         | SOX12     | NA                | NA                                                 | NA                                               | NA          | NA |
| chr20 | 1895794  | 1895794  | G         | A        | exonic       | SIRPA     | synonymous SNV    | p.V43V,SIRPA:NM_001040022:exon3:c.G129A:p.V43V,SIR | NA                                               | rs1135192   | NA |
| chr20 | 16033819 | 16033822 | TTTG      | -        | UTR3         | MACROD2   | NA                | NA                                                 | NA                                               | rs11471411  | NA |
| chr20 | 17971045 | 17971045 | A         | G        | UTR3         | MGME1     | NA                | NA                                                 | NA                                               | NA          | NA |
| chr20 | 19982007 | 19982010 | TTTT      | -        | UTR3         | RIN2      | NA                | NA                                                 | NA                                               | NA          | NA |
| chr20 | 25262727 | 25262727 | A         | C        | exonic       | PYGB      | nonsynonymous SNV | PYGB:NM_002862:exon12:c.A1462C:p.T488P             | NA                                               | NA          | D  |
| chr20 | 25595952 | 25595952 | A         | -        | UTR3         | NANP      | NA                | NA                                                 | NA                                               | NA          | NA |
| chr20 | 25753637 | 25753637 | C         | G        | ncRNA_exonic | FAM182B   | NA                | NA                                                 | NA                                               | rs75733040  | NA |
| chr20 | 25753646 | 25753646 | G         | C        | ncRNA_exonic | FAM182B   | NA                | NA                                                 | NA                                               | rs78538493  | NA |
| chr20 | 25753703 | 25753703 | G         | A        | ncRNA_exonic | FAM182B   | NA                | NA                                                 | NA                                               | rs76136647  | NA |
| chr20 | 25753734 | 25753734 | T         | G        | ncRNA_exonic | FAM182B   | NA                | NA                                                 | NA                                               | rs76753216  | NA |
| chr20 | 25754060 | 25754060 | C         | T        | ncRNA_exonic | FAM182B   | NA                | NA                                                 | NA                                               | rs74458126  | NA |
| chr20 | 25754073 | 25754073 | T         | A        | ncRNA_exonic | FAM182B   | NA                | NA                                                 | NA                                               | rs73904672  | NA |
| chr20 | 25754607 | 25754607 | C         | A        | ncRNA_exonic | FAM182B   | NA                | NA                                                 | NA                                               | rs115482967 | NA |
| chr20 | 25754620 | 25754620 | A         | G        | ncRNA_exonic | FAM182B   | NA                | NA                                                 | NA                                               | NA          | NA |
| chr20 | 25754622 | 25754622 | A         | G        | ncRNA_exonic | FAM182B   | NA                | NA                                                 | NA                                               | NA          | NA |
| chr20 | 25754689 | 25754689 | T         | C        | ncRNA_exonic | FAM182B   | NA                | NA                                                 | NA                                               | rs79458516  | NA |
| chr20 | 25754756 | 25754756 | G         | A        | ncRNA_exonic | FAM182B   | NA                | NA                                                 | NA                                               | rs76339741  | NA |
| chr20 | 25754774 | 25754774 | A         | C        | ncRNA_exonic | FAM182B   | NA                | NA                                                 | NA                                               | NA          | NA |
| chr20 | 25754782 | 25754782 | G         | T        | ncRNA_exonic | FAM182B   | NA                | NA                                                 | NA                                               | NA          | NA |
| chr20 | 26063630 | 26063630 | C         | T        | ncRNA_exonic | FAM182A   | NA                | NA                                                 | NA                                               | NA          | NA |
| chr20 | 26063651 | 26063651 | A         | G        | ncRNA_exonic | FAM182A   | NA                | NA                                                 | NA                                               | NA          | NA |
| chr20 | 26063683 | 26063683 | C         | T        | ncRNA_exonic | FAM182A   | NA                | NA                                                 | NA                                               | rs145735552 | NA |
| chr20 | 26064144 | 26064144 | T         | C        | ncRNA_exonic | FAM182A   | NA                | NA                                                 | NA                                               | NA          | NA |
| chr20 | 26064389 | 26064389 | A         | T        | ncRNA_exonic | FAM182A   | NA                | NA                                                 | NA                                               | rs200923238 | NA |
| chr20 | 26064961 | 26064961 | G         | C        | ncRNA_exonic | FAM182A   | NA                | NA                                                 | NA                                               | NA          | NA |
| chr20 | 26084261 | 26084261 | A         | G        | ncRNA_exonic | NCOR1P1   | NA                | NA                                                 | NA                                               | rs61752354  | NA |
| chr20 | 26084262 | 26084262 | G         | A        | ncRNA_exonic | NCOR1P1   | NA                | NA                                                 | NA                                               | rs79403010  | NA |
| chr20 | 29611898 | 29611898 | G         | C        | ncRNA_exonic | FRG1B     | NA                | NA                                                 | NA                                               | NA          | NA |
| chr20 | 29611950 | 29611950 | C         | T        | ncRNA_exonic | FRG1B     | NA                | NA                                                 | NA                                               | NA          | NA |
| chr20 | 29612047 | 29612047 | -         | G        | ncRNA_exonic | FRG1B     | NA                | NA                                                 | NA                                               | NA          | NA |
| chr20 | 29612048 | 29612048 | -         | CTTC     | ncRNA_exonic | FRG1B     | NA                | NA                                                 | NA                                               | NA          | NA |
| chr20 | 29612050 | 29612050 | -         | CGA      | ncRNA_exonic | FRG1B     | NA                | NA                                                 | NA                                               | NA          | NA |
| chr20 | 29612063 | 29612063 | T         | C        | ncRNA_exonic | FRG1B     | NA                | NA                                                 | NA                                               | NA          | NA |
| chr20 | 33098206 | 33098206 | C         | T        | UTR3         | ITCH      | NA                | NA                                                 | NA                                               | NA          | NA |

|       |          |          |          |      |              |               |                         |                                                     |                                 |             |    |
|-------|----------|----------|----------|------|--------------|---------------|-------------------------|-----------------------------------------------------|---------------------------------|-------------|----|
| chr20 | 33098244 | 33098244 | G        | T    | UTR3         | ITCH          | NA                      | NA                                                  | NA                              | NA          | NA |
| chr20 | 42090055 | 42090055 | A        | T    | UTR3         | SRSF6         | NA                      | NA                                                  | NA                              | NA          | NA |
| chr20 | 42694558 | 42694558 | -        | CCG  | exonic       | TOX2          | nonframeshift insertion | 1_1042insCCG:p.S347delinsSP,TOX2:NM_001098797:exo   | NA                              | rs199841880 | NA |
| chr20 | 43955092 | 43955092 | C        | A    | UTR3         | SDC4          | NA                      | NA                                                  | NA                              | NA          | NA |
| chr20 | 43955096 | 43955096 | C        | A    | UTR3         | SDC4          | NA                      | NA                                                  | NA                              | NA          | NA |
| chr20 | 48251757 | 48251757 | C        | T    | UTR3         | B4GALT5       | NA                      | NA                                                  | NA                              | NA          | NA |
| chr20 | 48251758 | 48251758 | A        | C    | UTR3         | B4GALT5       | NA                      | NA                                                  | NA                              | NA          | NA |
| chr20 | 48251759 | 48251759 | C        | G    | UTR3         | B4GALT5       | NA                      | NA                                                  | NA                              | NA          | NA |
| chr20 | 49367485 | 49367485 | A        | T    | UTR3         | PAR6B         | NA                      | NA                                                  | NA                              | NA          | NA |
| chr20 | 49367490 | 49367490 | G        | T    | UTR3         | PAR6B         | NA                      | NA                                                  | NA                              | NA          | NA |
| chr20 | 49367491 | 49367491 | A        | T    | UTR3         | PAR6B         | NA                      | NA                                                  | NA                              | NA          | NA |
| chr20 | 52560855 | 52560856 | TT       | -    | UTR3         | BCAS1         | NA                      | NA                                                  | NA                              | rs74631158  | NA |
| chr20 | 55213716 | 55213717 | TT       | -    | UTR3         | TFAP2C        | NA                      | NA                                                  | NA                              | NA          | NA |
| chr20 | 60709499 | 60709499 | C        | T    | UTR3         | LSM14B        | NA                      | NA                                                  | NA                              | NA          | NA |
| chr20 | 60790986 | 60790986 | T        | G    | UTR3         | HRH3          | NA                      | NA                                                  | NA                              | NA          | NA |
| chr20 | 61145196 | 61145196 | G        | A    | ncRNA_exonic | C20orf166-AS1 | NA                      | NA                                                  | NA                              | rs12479469  | NA |
| chr20 | 61732921 | 61732921 | T        | C    | ncRNA_exonic | HAR1A         | NA                      | NA                                                  | NA                              | rs73147778  | NA |
| chr20 | 61888686 | 61888686 | A        | G    | ncRNA_exonic | FLJ16779      | NA                      | NA                                                  | NA                              | NA          | NA |
| chr20 | 61888896 | 61888896 | A        | G    | ncRNA_exonic | FLJ16779      | NA                      | NA                                                  | NA                              | rs35166508  | NA |
| chr21 | 9907222  | 9907222  | T        | C    | ncRNA_exonic | TEKT4P2       | NA                      | NA                                                  | NA                              | rs1052822   | NA |
| chr21 | 10942995 | 10942995 | G        | A    | exonic       | TPTE          | stopgain SNV            | R160X,TPTE:NM_199259:exon11:c.C538T:p.R180X,TPTE:!  | ID=COSM376393;OCCURENCE=2(lung) | rs147014138 | NA |
| chr21 | 27253257 | 27253257 | G        | C    | UTR3         | APP           | NA                      | NA                                                  | NA                              | NA          | NA |
| chr21 | 28338952 | 28338952 | T        | -    | UTR5         | ADAMT55       | NA                      | NA                                                  | NA                              | NA          | NA |
| chr21 | 28338953 | 28338953 | G        | -    | UTR5         | ADAMT55       | NA                      | NA                                                  | NA                              | NA          | NA |
| chr21 | 34809434 | 34809434 | T        | -    | UTR3         | IFNGR2        | NA                      | NA                                                  | NA                              | rs71657077  | NA |
| chr21 | 43131861 | 43131861 | A        | G    | ncRNA_exonic | LINC00479     | NA                      | NA                                                  | NA                              | rs9982491   | NA |
| chr21 | 44838931 | 44838931 | A        | G    | exonic       | SIK1          | nonsynonymous SNV       | SIK1:NM_173354:exon11:c.T1432C:p.S478P              | NA                              | NA          | P  |
| chr21 | 45564932 | 45564932 | T        | -    | UTR3         | C21orf33      | NA                      | NA                                                  | NA                              | rs66662664  | NA |
| chr21 | 46684129 | 46684129 | -        | CTCA | UTR3         | POFUT2        | NA                      | NA                                                  | NA                              | rs140397390 | NA |
| chr21 | 47603640 | 47603640 | C        | G    | UTR5         | SPATC1L       | NA                      | NA                                                  | NA                              | NA          | NA |
| chr21 | 47721985 | 47721985 | -        | TGG  | exonic       | C21orf58      | nonframeshift insertion | Lorf58:NM_058180:exon8:c.897_898insCCA:p.H299delins | NA                              | rs71318063  | NA |
| chr22 | 19492888 | 19492888 | G        | A    | exonic       | CDC45         | nonsynonymous SNV       | 190I,CDC45:NM_003504:exon10:c.G708A:p.M236I,CDC4!   | NA                              | NA          | B  |
| chr22 | 19834263 | 19834263 | C        | A    | UTR3         | C22orf29      | NA                      | NA                                                  | NA                              | NA          | NA |
| chr22 | 21044156 | 21044156 | C        | A    | ncRNA_exonic | POM121L4P     | NA                      | NA                                                  | NA                              | rs192873282 | NA |
| chr22 | 21649095 | 21649095 | C        | -    | ncRNA_exonic | POM121L8P     | NA                      | NA                                                  | NA                              | NA          | NA |
| chr22 | 25044743 | 25044743 | A        | G    | ncRNA_exonic | POM121L10P    | NA                      | NA                                                  | NA                              | rs71242990  | NA |
| chr22 | 25054716 | 25054716 | C        | G    | ncRNA_exonic | POM121L10P    | NA                      | NA                                                  | NA                              | rs3888507   | NA |
| chr22 | 25264460 | 25264460 | T        | C    | exonic       | SGSM1         | nonsynonymous SNV       | 497:exon11:c.T1112C:p.L371P,SGSM1:NM_001098498:ex   | NA                              | NA          | NA |
| chr22 | 25603066 | 25603066 | C        | G    | exonic       | CRYBB3        | nonsynonymous SNV       | CRYBB3:NM_004076:exon6:c.C523G:p.R175G              | NA                              | NA          | P  |
| chr22 | 26847960 | 26847974 | GCGCGCGG | GCA  | UTR3         | HPS4          | NA                      | NA                                                  | NA                              | NA          | NA |
| chr22 | 29885823 | 29885823 | A        | T    | exonic       | NEFH          | nonsynonymous SNV       | NEFH:NM_021076:exon4:c.A2194T:p.T732S               | NA                              | rs145125701 | NA |
| chr22 | 29932727 | 29932727 | C        | A    | exonic       | THOC5         | nonsynonymous SNV       | 78:exon7:c.G600T:p.R200S,THOC5:NM_001002877:exon8   | NA                              | NA          | P  |
| chr22 | 30221159 | 30221159 | G        | A    | exonic       | ASCC2         | nonsynonymous SNV       | !42906:exon3:c.C169T:p.P57S,ASCC2:NM_032204:exon4:  | NA                              | NA          | B  |
| chr22 | 36662951 | 36662951 | A        | -    | UTR3         | APOL1         | NA                      | NA                                                  | NA                              | rs11321251  | NA |
| chr22 | 38687878 | 38687878 | C        | T    | UTR3         | CSNK1E        | NA                      | NA                                                  | NA                              | NA          | NA |
| chr22 | 39414807 | 39414807 | C        | A    | UTR3         | APOBEC3C      | NA                      | NA                                                  | NA                              | NA          | NA |
| chr22 | 40720295 | 40720295 | T        | -    | UTR3         | TNRC6B        | NA                      | NA                                                  | NA                              | rs71722737  | NA |
| chr22 | 42979736 | 42979736 | C        | A    | UTR3         | POLDIP3       | NA                      | NA                                                  | NA                              | NA          | NA |
| chr22 | 46436143 | 46436143 | -        | T    | ncRNA_exonic | LOC100271722  | NA                      | NA                                                  | NA                              | NA          | NA |
| chr22 | 46712068 | 46712068 | C        | A    | exonic       | GTSE1         | synonymous SNV          | GTSE1:NM_016426:exon7:c.C1191A:p.A397A              | NA                              | NA          | NA |
| chr22 | 50655686 | 50655686 | C        | G    | exonic       | SELO          | unknown                 | UNKNOWN                                             | NA                              | NA          | B  |
| chrX  | 8434161  | 8434161  | G        | A    | exonic       | VCX3B         | nonsynonymous SNV       | VCX3B:NM_001001888:exon3:c.G478A:p.V160M            | NA                              | rs6640132   | NA |
| chrX  | 10204764 | 10204764 | T        | -    | UTR3         | CLCN4         | NA                      | NA                                                  | NA                              | NA          | NA |
| chrX  | 10416148 | 10416148 | T        | -    | UTR3         | MID1          | NA                      | NA                                                  | NA                              | NA          | NA |
| chrX  | 15511350 | 15511350 | T        | G    | UTR5         | PIR           | NA                      | NA                                                  | NA                              | NA          | NA |
| chrX  | 19552343 | 19552343 | G        | T    | UTR3         | SH3KBP1       | NA                      | NA                                                  | NA                              | NA          | NA |
| chrX  | 30748293 | 30748293 | T        | C    | UTR3         | GK            | NA                      | NA                                                  | NA                              | rs5972221   | NA |
| chrX  | 31196550 | 31196550 | T        | -    | UTR3         | DMD           | NA                      | NA                                                  | NA                              | rs11333372  | NA |
| chrX  | 37027663 | 37027663 | A        | C    | exonic       | FAM47C        | nonsynonymous SNV       | FAM47C:NM_001013736:exon1:c.A1180C:p.T394P          | NA                              | NA          | NA |
| chrX  | 37028267 | 37028267 | C        | G    | exonic       | FAM47C        | nonsynonymous SNV       | FAM47C:NM_001013736:exon1:c.C1784G:p.P595R          | NA                              | NA          | NA |
| chrX  | 37028402 | 37028402 | A        | C    | exonic       | FAM47C        | nonsynonymous SNV       | FAM47C:NM_001013736:exon1:c.A1919C:p.Y640S          | NA                              | NA          | NA |
| chrX  | 37028629 | 37028629 | G        | C    | exonic       | FAM47C        | nonsynonymous SNV       | FAM47C:NM_001013736:exon1:c.G2146C:p.A716P          | NA                              | rs61999275  | NA |

|      |          |          |          |       |              |           |                   |                                                    |                                          |             |    |
|------|----------|----------|----------|-------|--------------|-----------|-------------------|----------------------------------------------------|------------------------------------------|-------------|----|
| chrX | 38664818 | 38664818 | T        | -     | UTR3         | MID1IP1   | NA                | NA                                                 | NA                                       | NA          | NA |
| chrX | 46919651 | 46919651 | T        | A     | UTR3         | PHF16     | NA                | NA                                                 | NA                                       | NA          | NA |
| chrX | 54224160 | 54224160 | -        | A     | UTR3         | WNK3      | NA                | NA                                                 | NA                                       | NA          | NA |
| chrX | 55478566 | 55478566 | G        | T     | UTR5         | MAGEH1    | NA                | NA                                                 | NA                                       | NA          | NA |
| chrX | 70520238 | 70520238 | T        | -     | ncRNA_UTR3   | NONO      | NA                | NA                                                 | NA                                       | rs34459863  | NA |
| chrX | 72297562 | 72297565 | ACAC     | -     | UTR3         | PABPC1L2A | NA                | NA                                                 | NA                                       | NA          | NA |
| chrX | 72298326 | 72298326 | T        | C     | UTR3         | PABPC1L2A | NA                | NA                                                 | NA                                       | rs182890337 | NA |
| chrX | 73071940 | 73071940 | T        | A     | ncRNA_exonic | XIST      | NA                | NA                                                 | NA                                       | NA          | NA |
| chrX | 77268407 | 77268407 | C        | A     | exonic       | ATP7A     | nonsynonymous SNV | ATP7A:NM_000052:exon10:c.C2204A:p.A735D            | NA                                       | NA          | D  |
| chrX | 84343124 | 84343127 | ATAA     | -     | UTR3         | APOOL     | NA                | NA                                                 | NA                                       | NA          | NA |
| chrX | 1E+08    | 1E+08    | GC       | -     | UTR3         | TMEM35    | NA                | NA                                                 | NA                                       | rs201592497 | NA |
| chrX | 1.02E+08 | 1.02E+08 | TT       | -     | UTR3         | BHLHB9    | NA                | NA                                                 | NA                                       | rs201112932 | NA |
| chrX | 1.1E+08  | 1.1E+08  | C        | T     | UTR3         | CHRD1     | NA                | NA                                                 | NA                                       | rs12007691  | NA |
| chrX | 1.31E+08 | 1.31E+08 | GAGAGAGA | -     | UTR3         | RAP2C     | NA                | NA                                                 | NA                                       | NA          | NA |
| chrX | 1.31E+08 | 1.31E+08 | -        | A     | UTR3         | RAP2C     | NA                | NA                                                 | NA                                       | NA          | NA |
| chrX | 1.41E+08 | 1.41E+08 | C        | G     | exonic       | MAGEC1    | synonymous SNV    | MAGEC1:NM_005462:exon4:c.C723G:p.S241S             | ID=COSM150831;OCCURENCE=1(stomach)       | rs176041    | NA |
| chrX | 1.45E+08 | 1.45E+08 | TTTT     | -     | UTR3         | SLITRK2   | NA                | NA                                                 | NA                                       | NA          | NA |
| chrX | 1.5E+08  | 1.5E+08  | C        | A     | exonic       | MAMLD1    | nonsynonymous SNV | .25N,MAMLD1:NM_001177465:exon3:c.C374A:p.T125N,I   | NA                                       | NA          | P  |
| chrX | 1.53E+08 | 1.53E+08 | T        | C     | UTR3         | BGN       | NA                | NA                                                 | NA                                       | rs1126598   | NA |
| chrX | 1.53E+08 | 1.53E+08 | T        | G     | UTR3         | HCFC1     | NA                | NA                                                 | ID=COSN414031;OCCURENCE=1(urinary_tract) | NA          | NA |
| chrX | 1.53E+08 | 1.53E+08 | T        | G     | exonic       | OPN1LW    | nonsynonymous SNV | OPN1LW:NM_020061:exon3:c.T538G:p.S180A             | NA                                       | rs949431    | B  |
| chr1 | 69511    | 69511    | A        | G     | exonic       | OR4F5     | nonsynonymous SNV | OR4F5:NM_001005484:exon1:c.A421G:p.T141A           | NA                                       | rs2691305   | B  |
| chr1 | 1310668  | 1310668  | A        | C     | UTR5         | AURKAIP1  | NA                | NA                                                 | NA                                       | rs2242398   | NA |
| chr1 | 3319390  | 3319390  | C        | T     | exonic       | PRDM16    | nonsynonymous SNV | 2114:exon6:c.C712T:p.L238F,PRDM16:NM_199454:exon6  | NA                                       | NA          | NA |
| chr1 | 3696890  | 3696890  | A        | C     | UTR3         | LRRC47    | NA                | NA                                                 | NA                                       | rs8379      | NA |
| chr1 | 7907805  | 7907805  | -        | T     | UTR3         | UTS2      | NA                | NA                                                 | NA                                       | rs112820691 | NA |
| chr1 | 11846092 | 11846092 | -        | T     | UTR3         | MTHFR     | NA                | NA                                                 | NA                                       | rs112870018 | NA |
| chr1 | 12888545 | 12888545 | C        | T     | UTR5         | PRAMEF11  | NA                | NA                                                 | NA                                       | rs2982101   | NA |
| chr1 | 12919642 | 12919642 | G        | A     | exonic       | PRAMEF2   | nonsynonymous SNV | PRAMEF2:NM_023014:exon3:c.G382A:p.A128T            | NA                                       | rs142476002 | B  |
| chr1 | 12919833 | 12919833 | A        | G     | exonic       | PRAMEF2   | synonymous SNV    | PRAMEF2:NM_023014:exon3:c.A573G:p.P191P            | ID=COSM246757;OCCURENCE=1(prostate)      | NA          | NA |
| chr1 | 12919840 | 12919840 | T        | C     | exonic       | PRAMEF2   | nonsynonymous SNV | PRAMEF2:NM_023014:exon3:c.T580C:p.Y194H            | ID=COSM246759;OCCURENCE=1(prostate)      | NA          | B  |
| chr1 | 13328199 | 13328199 | A        | C     | UTR3         | PRAMEF3   | NA                | NA                                                 | NA                                       | rs56684054  | NA |
| chr1 | 13328239 | 13328239 | C        | A     | UTR3         | PRAMEF3   | NA                | NA                                                 | NA                                       | rs28394386  | NA |
| chr1 | 15899478 | 15899478 | T        | C     | UTR3         | AGMAT     | NA                | NA                                                 | NA                                       | rs11587541  | NA |
| chr1 | 16111413 | 16111413 | C        | -     | UTR3         | FBLIM1    | NA                | NA                                                 | NA                                       | rs149301626 | NA |
| chr1 | 16375063 | 16375063 | C        | G     | exonic       | CLCNKB    | nonsynonymous SNV | CLCNKB:NM_000085:exon7:c.C641G:p.A214G             | NA                                       | rs1889789   | B  |
| chr1 | 16375064 | 16375064 | A        | C     | exonic       | CLCNKB    | synonymous SNV    | CLCNKB:NM_000085:exon7:c.A642C:p.A214A             | NA                                       | rs1889790   | NA |
| chr1 | 16890441 | 16890441 | C        | T     | exonic       | NBPF1     | unknown           | UNKNOWN                                            | NA                                       | rs3863779   | NA |
| chr1 | 16902943 | 16902943 | T        | C     | exonic       | NBPF1     | unknown           | UNKNOWN                                            | NA                                       | rs3896429   | NA |
| chr1 | 16915434 | 16915434 | T        | C     | exonic       | NBPF1     | unknown           | UNKNOWN                                            | NA                                       | rs202129231 | NA |
| chr1 | 16915513 | 16915513 | C        | G     | exonic       | NBPF1     | unknown           | UNKNOWN                                            | NA                                       | rs61773582  | NA |
| chr1 | 17023376 | 17023376 | C        | T     | ncRNA_exonic | ESPNP     | NA                | NA                                                 | NA                                       | rs613579    | NA |
| chr1 | 17023403 | 17023403 | G        | A     | ncRNA_exonic | ESPNP     | NA                | NA                                                 | NA                                       | rs10907267  | NA |
| chr1 | 17046549 | 17046549 | G        | A     | ncRNA_exonic | ESPNP     | NA                | NA                                                 | NA                                       | rs1755332   | NA |
| chr1 | 17081606 | 17081606 | A        | C     | UTR3         | MST1L     | NA                | NA                                                 | NA                                       | rs28661960  | NA |
| chr1 | 17082701 | 17082701 | A        | T     | UTR3         | MST1L     | NA                | NA                                                 | NA                                       | rs1831696   | NA |
| chr1 | 20671961 | 20671961 | G        | A     | exonic       | VWA5B1    | nonsynonymous SNV | VWA5B1:NM_001039500:exon17:c.G2639A:p.R880H        | NA                                       | rs11582960  | NA |
| chr1 | 21808223 | 21808223 | T        | C     | exonic       | NBPF3     | synonymous SNV    | .453L,NBPF3:NM_001256416:exon13:c.T1531C:p.L511L,N | NA                                       | rs145079058 | NA |
| chr1 | 22357549 | 22357549 | G        | T     | ncRNA_exonic | LINC00339 | NA                | NA                                                 | NA                                       | rs2473291   | NA |
| chr1 | 22418256 | 22418256 | G        | T     | UTR3         | CDC42     | NA                | NA                                                 | NA                                       | NA          | NA |
| chr1 | 23695593 | 23695593 | -        | G     | ncRNA_exonic | C1orf213  | NA                | NA                                                 | NA                                       | NA          | NA |
| chr1 | 23886300 | 23886300 | C        | -     | upstream     | ID3       | NA                | NA                                                 | NA                                       | rs139377135 | NA |
| chr1 | 24999676 | 24999676 | -        | T     | UTR3         | SRRM1     | NA                | NA                                                 | NA                                       | rs113632210 | NA |
| chr1 | 25747230 | 25747230 | G        | C     | exonic       | RHCE      | nonsynonymous SNV | 18616:exon1:c.C48G:p.C16W,RHCE:NM_138617:exon1:c.C | NA                                       | rs201634828 | B  |
| chr1 | 26786627 | 26786627 | G        | A     | exonic       | DHDDS     | nonsynonymous SNV | .43565:exon7:c.G640A:p.V214M,DHDDS:NM_024887:exo   | ID=COSM146454;OCCURENCE=1(stomach)       | rs3816539   | B  |
| chr1 | 28087457 | 28087457 | G        | T     | UTR3         | FAM76A    | NA                | NA                                                 | NA                                       | rs74422309  | NA |
| chr1 | 32638774 | 32638774 | -        | AAAAA | UTR3         | KPNA6     | NA                | NA                                                 | NA                                       | NA          | NA |
| chr1 | 33148362 | 33148362 | -        | CT    | UTR3         | RBBP4     | NA                | NA                                                 | NA                                       | rs5773380   | NA |
| chr1 | 33475767 | 33475767 | G        | A     | UTR3         | AK2       | NA                | NA                                                 | NA                                       | rs74066436  | NA |
| chr1 | 33475791 | 33475791 | A        | G     | UTR3         | AK2       | NA                | NA                                                 | NA                                       | rs6884      | NA |
| chr1 | 38327384 | 38327384 | A        | G     | UTR3         | INPP5B    | NA                | NA                                                 | NA                                       | rs12729989  | NA |
| chr1 | 38423061 | 38423061 | C        | T     | UTR3         | SF3A3     | NA                | NA                                                 | NA                                       | rs28667771  | NA |

|      |          |          |           |   |              |                   |                   |                                                                                       |                                    |             |    |
|------|----------|----------|-----------|---|--------------|-------------------|-------------------|---------------------------------------------------------------------------------------|------------------------------------|-------------|----|
| chr1 | 39796845 | 39796855 | TTTTTTTTT | - | intronic     | MACF1             | NA                | NA                                                                                    | NA                                 | rs201626891 | NA |
| chr1 | 39835817 | 39835817 | A         | G | exonic       | MACF1             | nonsynonymous SNV | MACF1:NM_012090:exon47:c.A6868G:p.M2290V                                              | NA                                 | rs2296172   | B  |
| chr1 | 44084739 | 44084739 | C         | T | exonic       | PTPRF             | synonymous SNV    | PTPRF:NM_002840:exon27:c.C4485T:p.R1495R,PTPRF:NM_002840:exon27:c.C4485T:p.R1495R     | NA                                 | rs11443701  | NA |
| chr1 | 47099235 | 47099235 | A         | C | intergenic   | st=16672),ATPAF1( | NA                | NA                                                                                    | NA                                 | rs4660950   | NA |
| chr1 | 51820325 | 51820325 | C         | T | UTR3         | EPS15             | NA                | NA                                                                                    | NA                                 | rs11554033  | NA |
| chr1 | 52817556 | 52817556 | A         | - | UTR3         | CC2D1B            | NA                | NA                                                                                    | NA                                 | rs60552348  | NA |
| chr1 | 54681920 | 54681920 | G         | C | exonic       | MRPL37            | nonsynonymous SNV | MRPL37:NM_016491:exon6:c.G1097C:p.C366S                                               | NA                                 | rs13571     | B  |
| chr1 | 61921185 | 61921185 | -         | T | UTR3         | NFIA              | NA                | NA                                                                                    | NA                                 | rs111405657 | NA |
| chr1 | 62702803 | 62702803 | -         | T | UTR3         | KANK4             | NA                | NA                                                                                    | NA                                 | NA          | NA |
| chr1 | 62960101 | 62960101 | A         | G | exonic       | DOCK7             | synonymous SNV    | DOCK7:NM_033407:exon3:c.T4942C:p.L1648L,DOCK7:NM_033407:exon3:c.T4942C:p.L1648L       | NA                                 | rs10889335  | NA |
| chr1 | 64036764 | 64036764 | A         | G | exonic       | EFCAB7            | nonsynonymous SNV | EFCAB7:NM_032437:exon13:c.A1780G:p.I594V                                              | NA                                 | rs199608136 | B  |
| chr1 | 66831370 | 66831370 | G         | A | exonic       | PDE4B             | synonymous SNV    | PDE4B:NM_001037341:exon10:c.G1260A:p.E420E,PDE4B:NM_001037341:exon10:c.G1260A:p.E420E | NA                                 | rs783036    | NA |
| chr1 | 78343510 | 78343510 | C         | T | UTR3         | FAM73A            | NA                | NA                                                                                    | NA                                 | rs55760347  | NA |
| chr1 | 85462665 | 85462665 | T         | G | UTR5         | MCOLN2            | NA                | NA                                                                                    | NA                                 | rs11161505  | NA |
| chr1 | 89225976 | 89225976 | T         | C | exonic       | PKN2              | synonymous SNV    | PKN2:NM_006256:exon3:c.T421C:p.L141L                                                  | NA                                 | rs430600    | NA |
| chr1 | 92149277 | 92149277 | C         | T | UTR3         | TGFBR3            | NA                | NA                                                                                    | NA                                 | rs1131243   | NA |
| chr1 | 93620393 | 93620393 | G         | A | exonic       | TMED5             | nonsynonymous SNV | TMED5:NM_016040:exon4:c.C524T:p.T175I                                                 | NA                                 | rs1060622   | D  |
| chr1 | 94982785 | 94982785 | A         | T | UTR3         | ABCD3             | NA                | NA                                                                                    | NA                                 | rs77888949  | NA |
| chr1 | 94984053 | 94984053 | A         | - | UTR3         | ABCD3             | NA                | NA                                                                                    | NA                                 | rs144257807 | NA |
| chr1 | 95363001 | 95363001 | T         | C | UTR3         | CNN3              | NA                | NA                                                                                    | NA                                 | rs3789699   | NA |
| chr1 | 97770920 | 97770920 | C         | T | exonic       | DPYD              | nonsynonymous SNV | DPYD:NM_000110:exon18:c.G2194A:p.V732I                                                | NA                                 | rs1801160   | D  |
| chr1 | 1.01E+08 | 1.01E+08 | TTTTTTTTT | - | UTR3         | RTCA              | NA                | NA                                                                                    | NA                                 | NA          | NA |
| chr1 | 1.03E+08 | 1.03E+08 | G         | A | exonic       | COL11A1           | nonsynonymous SNV | COL11A1:NM_001854:exon51:c.C3851T:p.P1284L,COL11A1:NM_001854:exon51:c.C3851T:p.P1284L | NA                                 | rs3753841   | NA |
| chr1 | 1.11E+08 | 1.11E+08 | G         | A | UTR3         | SLC16A4           | NA                | NA                                                                                    | NA                                 | rs185712869 | NA |
| chr1 | 1.12E+08 | 1.12E+08 | T         | C | exonic       | OVGP1             | nonsynonymous SNV | OVGP1:NM_002557:exon11:c.A1562G:p.E521G                                               | NA                                 | rs75512011  | B  |
| chr1 | 1.12E+08 | 1.12E+08 | C         | T | exonic       | OVGP1             | synonymous SNV    | OVGP1:NM_002557:exon11:c.G1560A:p.G520G                                               | NA                                 | NA          | NA |
| chr1 | 1.12E+08 | 1.12E+08 | G         | C | exonic       | OVGP1             | nonsynonymous SNV | OVGP1:NM_002557:exon11:c.C1553G:p.T518S                                               | NA                                 | rs45455292  | B  |
| chr1 | 1.12E+08 | 1.12E+08 | A         | G | exonic       | OVGP1             | nonsynonymous SNV | OVGP1:NM_002557:exon11:c.T1540C:p.Y514H                                               | NA                                 | rs1126656   | B  |
| chr1 | 1.12E+08 | 1.12E+08 | A         | G | exonic       | OVGP1             | nonsynonymous SNV | OVGP1:NM_002557:exon11:c.T1531C:p.S511P                                               | NA                                 | rs56294468  | B  |
| chr1 | 1.13E+08 | 1.13E+08 | T         | G | exonic       | ST7L              | synonymous SNV    | ST7L:NM_138728:exon7:c.A3727T:p.L224L,ST7L:NM_138728:exon7:c.A3727T:p.L224L           | NA                                 | NA          | NA |
| chr1 | 1.15E+08 | 1.15E+08 | G         | A | UTR5         | CSDE1             | NA                | NA                                                                                    | NA                                 | rs41274132  | NA |
| chr1 | 1.45E+08 | 1.45E+08 | A         | G | UTR5         | NBPF8,NBPF9       | NA                | NA                                                                                    | NA                                 | rs201543878 | NA |
| chr1 | 1.45E+08 | 1.45E+08 | T         | C | UTR5         | NBPF8,NBPF9       | NA                | NA                                                                                    | NA                                 | rs199745076 | NA |
| chr1 | 1.45E+08 | 1.45E+08 | G         | T | exonic       | SEC22B            | unknown           | UNKNOWN                                                                               | NA                                 | rs2596331   | NA |
| chr1 | 1.45E+08 | 1.45E+08 | T         | C | UTR3         | SEC22B            | NA                | NA                                                                                    | NA                                 | rs7550440   | NA |
| chr1 | 1.48E+08 | 1.48E+08 | T         | C | exonic       | NBPF14            | synonymous SNV    | NBPF14:NM_015383:exon22:c.A2766G:p.X922X                                              | NA                                 | rs79370452  | NA |
| chr1 | 1.49E+08 | 1.49E+08 | T         | C | ncRNA_exonic | LOC388692         | NA                | NA                                                                                    | NA                                 | rs149624901 | NA |
| chr1 | 1.52E+08 | 1.52E+08 | T         | A | exonic       | HRNR              | nonsynonymous SNV | HRNR:NM_001009931:exon3:c.A7406T:p.Q2469L                                             | NA                                 | rs75280488  | NA |
| chr1 | 1.52E+08 | 1.52E+08 | G         | A | exonic       | HRNR              | nonsynonymous SNV | HRNR:NM_001009931:exon3:c.C5642T:p.S1881F                                             | NA                                 | rs61814941  | NA |
| chr1 | 1.53E+08 | 1.53E+08 | G         | T | UTR3         | LCE1E             | NA                | NA                                                                                    | NA                                 | rs114470093 | NA |
| chr1 | 1.61E+08 | 1.61E+08 | C         | G | exonic       | CD48              | nonsynonymous SNV | CD48:NM_001778:exon2:c.G304C:p.E102Q,CD48:NM_001778:exon2:c.G304C:p.E102Q             | ID=COSM146667;OCCURENCE=1(stomach) | rs2295615   | D  |
| chr1 | 1.61E+08 | 1.61E+08 | -         | A | UTR3         | USF1              | NA                | NA                                                                                    | NA                                 | NA          | NA |
| chr1 | 1.62E+08 | 1.62E+08 | C         | G | UTR5         | SH2D1B            | NA                | NA                                                                                    | NA                                 | rs66518016  | NA |
| chr1 | 1.63E+08 | 1.63E+08 | T         | - | UTR3         | RGS5              | NA                | NA                                                                                    | NA                                 | NA          | NA |
| chr1 | 1.67E+08 | 1.67E+08 | -         | A | UTR3         | POGK              | NA                | NA                                                                                    | NA                                 | NA          | NA |
| chr1 | 1.68E+08 | 1.68E+08 | A         | G | exonic       | ADCY10            | synonymous SNV    | ADCY10:NM_018417:exon16:c.T1938C:p.G646G,ADCY10:NM_018417:exon16:c.T1938C:p.G646G     | NA                                 | rs203795    | NA |
| chr1 | 1.7E+08  | 1.7E+08  | C         | T | exonic       | SELP              | synonymous SNV    | SELP:NM_003005:exon14:c.G2346A:p.T782T                                                | NA                                 | rs6128      | NA |
| chr1 | 1.7E+08  | 1.7E+08  | C         | T | exonic       | KIFAP3            | synonymous SNV    | KIFAP3:NM_014970:exon17:c.G1398A:p.G466G,KIFAP3:NM_014970:exon17:c.G1398A:p.G466G     | NA                                 | rs33943686  | NA |
| chr1 | 1.7E+08  | 1.7E+08  | A         | G | ncRNA_exonic | LOC284688         | NA                | NA                                                                                    | NA                                 | rs3795614   | NA |
| chr1 | 1.7E+08  | 1.7E+08  | T         | C | ncRNA_exonic | LOC284688         | NA                | NA                                                                                    | NA                                 | rs3795615   | NA |
| chr1 | 1.71E+08 | 1.71E+08 | G         | T | ncRNA_exonic | FMO6P             | NA                | NA                                                                                    | NA                                 | rs11812061  | NA |
| chr1 | 1.77E+08 | 1.77E+08 | C         | T | exonic       | PAPPA2            | synonymous SNV    | PAPPA2:NM_020318:exon22:c.C5262T:p.D1754D                                             | NA                                 | rs12118034  | NA |
| chr1 | 1.78E+08 | 1.78E+08 | G         | A | exonic       | SEC16B            | synonymous SNV    | SEC16B:NM_033127:exon8:c.C954T:p.S318S                                                | NA                                 | rs35891059  | NA |
| chr1 | 1.8E+08  | 1.8E+08  | A         | G | exonic       | TDRD5             | nonsynonymous SNV | TDRD5:NM_001199091:exon7:c.A1072G:p.K358E,TDRD5:NM_001199091:exon7:c.A1072G:p.K358E   | NA                                 | rs6704505   | B  |
| chr1 | 1.8E+08  | 1.8E+08  | A         | C | exonic       | TOR1AIP1          | synonymous SNV    | TOR1AIP1:NM_015602:exon1:c.A64C:p.R22R,TOR1AIP1:NM_015602:exon1:c.A64C:p.R22R         | NA                                 | NA          | NA |
| chr1 | 1.82E+08 | 1.82E+08 | G         | A | exonic       | CACNA1E           | nonsynonymous SNV | CACNA1E:NM_000721:exon44:c.G5863A:p.A1955T,CACNA1E:NM_000721:exon44:c.G5863A:p.A1955T | NA                                 | rs704326    | NA |
| chr1 | 1.97E+08 | 1.97E+08 | T         | G | UTR3         | CFHR5             | NA                | NA                                                                                    | NA                                 | rs10922153  | NA |
| chr1 | 2.01E+08 | 2.01E+08 | TTTATTAT  | - | UTR3         | KIF14             | NA                | NA                                                                                    | NA                                 | NA          | NA |
| chr1 | 2.01E+08 | 2.01E+08 | A         | G | exonic       | IGFN1             | nonsynonymous SNV | IGFN1:NM_001164586:exon12:c.A5416G:p.S1806G                                           | NA                                 | NA          | NA |
| chr1 | 2.02E+08 | 2.02E+08 | AA        | - | UTR3         | ELF3              | NA                | NA                                                                                    | NA                                 | rs77731786  | NA |
| chr1 | 2.02E+08 | 2.02E+08 | T         | - | UTR3         | GPR37L1           | NA                | NA                                                                                    | NA                                 | rs35555096  | NA |
| chr1 | 2.04E+08 | 2.04E+08 | T         | C | exonic       | ATP2B4            | synonymous SNV    | ATP2B4:NM_001684:exon3:c.T318C:p.L106L,ATP2B4:NM_001684:exon3:c.T318C:p.L106L         | NA                                 | rs2228445   | NA |



|      |          |          |        |      |              |                   |                   |                                                   |    |             |    |
|------|----------|----------|--------|------|--------------|-------------------|-------------------|---------------------------------------------------|----|-------------|----|
| chr1 | 2.07E+08 | 2.07E+08 | T      | G    | UTR3         | C1orf116          | NA                | NA                                                | NA | rs3020      | NA |
| chr1 | 2.07E+08 | 2.07E+08 | C      | T    | UTR3         | C1orf116          | NA                | NA                                                | NA | rs10877     | NA |
| chr1 | 2.08E+08 | 2.08E+08 | -      | T    | UTR3         | PLXNA2            | NA                | NA                                                | NA | NA          | NA |
| chr1 | 2.12E+08 | 2.12E+08 | T      | G    | UTR3         | DTL               | NA                | NA                                                | NA | rs1387815   | NA |
| chr1 | 2.13E+08 | 2.13E+08 | A      | G    | UTR3         | NSL1              | NA                | NA                                                | NA | rs11800642  | NA |
| chr1 | 2.21E+08 | 2.21E+08 | A      | G    | UTR5         | HLX               | NA                | NA                                                | NA | rs2738752   | NA |
| chr1 | 2.21E+08 | 2.21E+08 | T      | -    | UTR5         | HLX               | NA                | NA                                                | NA | rs11300127  | NA |
| chr1 | 2.23E+08 | 2.23E+08 | G      | C    | exonic       | TAF1A             | synonymous SNV    | G,TAF1A:NM_001201536:exon10:c.C1143G:p.G381G,TAF  | NA | rs1134898   | NA |
| chr1 | 2.25E+08 | 2.25E+08 | A      | G    | exonic       | DNAH14            | nonsynonymous SNV | DNAH14:NM_001373:exon37:c.A5771G:p.K1924R         | NA | rs191528375 | NA |
| chr1 | 2.27E+08 | 2.27E+08 | A      | G    | UTR3         | C1orf95           | NA                | NA                                                | NA | rs114523191 | NA |
| chr1 | 2.28E+08 | 2.28E+08 | AAAA   | -    | UTR5         | CDC42BPA          | NA                | NA                                                | NA | rs199516755 | NA |
| chr1 | 2.28E+08 | 2.28E+08 | G      | A    | exonic       | OBSCN             | nonsynonymous SNV | OM,OBSCN:NM_052843:exon30:c.G8158A:p.V2720M,OB:   | NA | rs1188697   | NA |
| chr1 | 2.3E+08  | 2.3E+08  | G      | A    | UTR3         | TAF5L             | NA                | NA                                                | NA | rs3820359   | NA |
| chr1 | 2.3E+08  | 2.3E+08  | C      | T    | intronic     | PGBD5             | NA                | NA                                                | NA | rs2009265   | NA |
| chr1 | 2.31E+08 | 2.31E+08 | C      | A    | UTR3         | FAM89A            | NA                | NA                                                | NA | NA          | NA |
| chr1 | 2.33E+08 | 2.33E+08 | C      | T    | exonic       | SIPA1L2           | synonymous SNV    | SIPA1L2:NM_020808:exon1:c.G219A:p.K73K            | NA | rs4649383   | NA |
| chr1 | 2.35E+08 | 2.35E+08 | T      | C    | exonic       | TARBP1            | nonsynonymous SNV | TARBP1:NM_005646:exon12:c.A2032G:p.S678G          | NA | rs4920246   | B  |
| chr1 | 2.35E+08 | 2.35E+08 | T      | C    | exonic       | ARID4B            | synonymous SNV    | .E299E,ARID4B:NM_016374:exon11:c.A897G:p.E299E,AR | NA | rs12731746  | NA |
| chr1 | 2.36E+08 | 2.36E+08 | G      | C    | UTR3         | B3GALNT2          | NA                | NA                                                | NA | rs6429095   | NA |
| chr1 | 2.36E+08 | 2.36E+08 | G      | A    | UTR3         | B3GALNT2          | NA                | NA                                                | NA | rs6429096   | NA |
| chr1 | 2.38E+08 | 2.38E+08 | C      | G    | UTR3         | RYR2              | NA                | NA                                                | NA | rs12406863  | NA |
| chr1 | 2.49E+08 | 2.49E+08 | G      | A    | exonic       | OR2T34            | nonsynonymous SNV | OR2T34:NM_001001821:exon1:c.C766T:p.L256F         | NA | rs200427293 | B  |
| chr1 | 2.49E+08 | 2.49E+08 | C      | G    | exonic       | OR2T34            | synonymous SNV    | OR2T34:NM_001001821:exon1:c.G765C:p.L255L         | NA | rs201475070 | NA |
| chr1 | 2.49E+08 | 2.49E+08 | C      | -    | UTR5         | SH3BP5L           | NA                | NA                                                | NA | rs28362662  | NA |
| chr2 | 224919   | 224919   | A      | G    | exonic       | SH3YL1            | synonymous SNV    | SH3YL1:NM_015677:exon9:c.T783C:p.S261S            | NA | rs2290911   | NA |
| chr2 | 3718692  | 3718692  | C      | T    | UTR5         | ALLC              | NA                | NA                                                | NA | rs13409104  | NA |
| chr2 | 5839842  | 5839846  | TTTTT  | -    | UTR3         | SOX11             | NA                | NA                                                | NA | rs200138663 | NA |
| chr2 | 18768850 | 18768850 | A      | G    | exonic       | NT5C1B,NT5C1B-RDH | synonymous SNV    | NT5C1B:NM_001199088:exon2:c.T39C:p.P13P,NT5C1B-RI | NA | rs16985306  | NA |
| chr2 | 20131079 | 20131079 | T      | C    | exonic       | WDR35             | nonsynonymous SNV | exon24:c.A2915G:p.E972G,WDR35:NM_001006657:exon:  | NA | rs1191778   | B  |
| chr2 | 29023100 | 29023100 | T      | C    | UTR3         | PPP1CB            | NA                | NA                                                | NA | NA          | NA |
| chr2 | 30865267 | 30865267 | T      | -    | UTR3         | LCLAT1            | NA                | NA                                                | NA | NA          | NA |
| chr2 | 30865753 | 30865753 | -      | TT   | UTR3         | LCLAT1            | NA                | NA                                                | NA | NA          | NA |
| chr2 | 31396115 | 31396115 | G      | A    | UTR3         | CAPN14            | NA                | NA                                                | NA | rs2044244   | NA |
| chr2 | 31610701 | 31610701 | C      | T    | exonic       | XDH               | synonymous SNV    | XDH:NM_000379:exon8:c.G627A:p.E209E               | NA | rs45575032  | NA |
| chr2 | 33412077 | 33412077 | G      | A    | exonic       | LTBP1             | synonymous SNV    | 26A,LTBP1:NM_001166265:exon2:c.G378A:p.A126A,LTBP | NA | rs1065324   | NA |
| chr2 | 33447202 | 33447202 | C      | T    | exonic       | LTBP1             | synonymous SNV    | 34N,LTBP1:NM_001166265:exon5:c.C882T:p.N294N,LTBP | NA | rs2290448   | NA |
| chr2 | 33951299 | 33951299 | -      | TT   | ncRNA_exonic | MYADML            | NA                | NA                                                | NA | rs71409649  | NA |
| chr2 | 37230734 | 37230734 | C      | T    | exonic       | HEATR5B           | synonymous SNV    | HEATR5B:NM_019024:exon31:c.G5001A:p.Q1667Q        | NA | rs17497654  | NA |
| chr2 | 37323460 | 37323460 | G      | C    | UTR3         | GPATCH11          | NA                | NA                                                | NA | rs12474977  | NA |
| chr2 | 38522260 | 38522260 | A      | T    | UTR3         | ATL2              | NA                | NA                                                | NA | rs6987      | NA |
| chr2 | 44546016 | 44546016 | C      | T    | UTR3         | PREPL             | NA                | NA                                                | NA | rs8410      | NA |
| chr2 | 46746963 | 46746963 | A      | G    | UTR5         | ATP6V1E2          | NA                | NA                                                | NA | rs4952830   | NA |
| chr2 | 58388696 | 58388696 | A      | G    | exonic       | FANCL             | synonymous SNV    | 4636:exon12:c.T996C:p.S332S,FANCL:NM_018062:exon1 | NA | rs848291    | NA |
| chr2 | 63283478 | 63283478 | C      | A    | UTR3         | OTX1              | NA                | NA                                                | NA | NA          | NA |
| chr2 | 64119863 | 64119863 | -      | T    | UTR3         | VPS54             | NA                | NA                                                | NA | NA          | NA |
| chr2 | 71036190 | 71036190 | A      | -    | UTR3         | CLEC4F            | NA                | NA                                                | NA | rs149426278 | NA |
| chr2 | 71429725 | 71429725 | T      | C    | UTR5         | PAIP2B            | NA                | NA                                                | NA | rs56871884  | NA |
| chr2 | 72707874 | 72707874 | A      | G    | exonic       | EXOC6B            | synonymous SNV    | EXOC6B:NM_015189:exon17:c.T1671C:p.V557V          | NA | rs653220    | NA |
| chr2 | 85546302 | 85546302 | T      | -    | UTR3         | TGOLN2            | NA                | NA                                                | NA | NA          | NA |
| chr2 | 85549650 | 85549650 | G      | C    | UTR3         | TGOLN2            | NA                | NA                                                | NA | NA          | NA |
| chr2 | 85776490 | 85776490 | -      | TTTA | UTR3         | GGCX              | NA                | NA                                                | NA | rs5832649   | NA |
| chr2 | 86016656 | 86016656 | G      | A    | UTR3         | ATOH8             | NA                | NA                                                | NA | rs13035450  | NA |
| chr2 | 91970053 | 91970053 | A      | G    | ncRNA_exonic | GGT8P             | NA                | NA                                                | NA | rs200455966 | NA |
| chr2 | 91970089 | 91970089 | G      | C    | ncRNA_exonic | GGT8P             | NA                | NA                                                | NA | rs147452528 | NA |
| chr2 | 91970112 | 91970112 | C      | T    | ncRNA_exonic | GGT8P             | NA                | NA                                                | NA | rs139857385 | NA |
| chr2 | 96676301 | 96676301 | C      | A    | ncRNA_exonic | FAHD2CP           | NA                | NA                                                | NA | rs2443817   | NA |
| chr2 | 97915895 | 97915895 | T      | C    | exonic       | ANKRD36           | synonymous SNV    | ANKRD36:NM_001164315:exon75:c.T5817C:p.F1939F     | NA | rs201565865 | NA |
| chr2 | 97915896 | 97915896 | G      | A    | exonic       | ANKRD36           | nonsynonymous SNV | ANKRD36:NM_001164315:exon75:c.G5818A:p.E1940K     | NA | rs199628660 | NA |
| chr2 | 98127653 | 98127653 | T      | G    | exonic       | ANKRD36B          | nonsynonymous SNV | ANKRD36B:NM_025190:exon39:c.A3668C:p.N1223T       | NA | rs62157161  | NA |
| chr2 | 98127659 | 98127659 | T      | C    | exonic       | ANKRD36B          | nonsynonymous SNV | ANKRD36B:NM_025190:exon39:c.A3662G:p.E1221G       | NA | NA          | NA |
| chr2 | 99237792 | 99237792 | C      | T    | UTR3         | MGAT4A            | NA                | NA                                                | NA | rs11892744  | NA |
| chr2 | 1.07E+08 | 1.07E+08 | AACAAC | -    | UTR3         | ST6GAL2           | NA                | NA                                                | NA | rs200860434 | NA |

|      |          |          |          |          |              |            |                   |                                                                                                  |                                                 |             |    |
|------|----------|----------|----------|----------|--------------|------------|-------------------|--------------------------------------------------------------------------------------------------|-------------------------------------------------|-------------|----|
| chr2 | 1.09E+08 | 1.09E+08 | T        | -        | UTR3         | SULT1C2    | NA                | NA                                                                                               | NA                                              | rs35976654  | NA |
| chr2 | 1.09E+08 | 1.09E+08 | C        | T        | UTR3         | GCC2       | NA                | NA                                                                                               | NA                                              | rs1138412   | NA |
| chr2 | 1.09E+08 | 1.09E+08 | -        | TT       | UTR3         | GCC2       | NA                | NA                                                                                               | NA                                              | rs201168024 | NA |
| chr2 | 1.14E+08 | 1.14E+08 | G        | C        | ncRNA_exonic | DDX11L2    | NA                | NA                                                                                               | NA                                              | rs7340345   | NA |
| chr2 | 1.2E+08  | 1.2E+08  | T        | G        | UTR5         | EN1        | NA                | NA                                                                                               | NA                                              | rs4989649   | NA |
| chr2 | 1.21E+08 | 1.21E+08 | G        | A        | exonic       | EPB41L5    | nonsynonymous SNV | 137:exon17:c.G1384A:p.A462T,EPB41L5:NM_020909:exor                                               | NA                                              | rs1034489   | B  |
| chr2 | 1.31E+08 | 1.31E+08 | C        | A        | exonic       | POTEF      | nonsynonymous SNV | POTEF:NM_001099771:exon17:c.G2601T:p.E867D                                                       | NA                                              | rs2599794   | NA |
| chr2 | 1.32E+08 | 1.32E+08 | A        | G        | UTR5         | ARHGEF4    | NA                | NA                                                                                               | NA                                              | rs3739127   | NA |
| chr2 | 1.33E+08 | 1.33E+08 | C        | T        | ncRNA_exonic | ANKRD30BL  | NA                | NA                                                                                               | NA                                              | rs112570337 | NA |
| chr2 | 1.33E+08 | 1.33E+08 | G        | A        | ncRNA_exonic | ANKRD30BL  | NA                | NA                                                                                               | NA                                              | rs112577594 | NA |
| chr2 | 1.33E+08 | 1.33E+08 | A        | C        | ncRNA_exonic | ANKRD30BL  | NA                | NA                                                                                               | NA                                              | rs148060042 | NA |
| chr2 | 1.57E+08 | 1.57E+08 | G        | C        | UTR3         | GPD2       | NA                | NA                                                                                               | NA                                              | rs1991776   | NA |
| chr2 | 1.9E+08  | 1.9E+08  | A        | C        | exonic       | DIRC1      | nonsynonymous SNV | DIRC1:NM_052952:exon2:c.T151G:p.S51A                                                             | NA                                              | rs72902678  | NA |
| chr2 | 1.92E+08 | 1.92E+08 | G        | A        | exonic       | MYO1B      | synonymous SNV    | 190E,MYO1B:NM_001161819:exon16:c.G1470A:p.E490E,I                                                | NA                                              | rs13018796  | NA |
| chr2 | 1.98E+08 | 1.98E+08 | A        | T        | UTR3         | PGAP1      | NA                | NA                                                                                               | NA                                              | NA          | NA |
| chr2 | 1.99E+08 | 1.99E+08 | G        | A        | exonic       | RFTN2      | synonymous SNV    | RFTN2:NM_144629:exon3:c.C369T:p.L123L                                                            | NA                                              | rs10497806  | NA |
| chr2 | 2.01E+08 | 2.01E+08 | -        | T        | UTR3         | SPATS2L    | NA                | NA                                                                                               | NA                                              | NA          | NA |
| chr2 | 2.01E+08 | 2.01E+08 | A        | -        | UTR3         | SPATS2L    | NA                | NA                                                                                               | NA                                              | rs11313633  | NA |
| chr2 | 2.02E+08 | 2.02E+08 | A        | -        | UTR3         | TRAK2      | NA                | NA                                                                                               | NA                                              | rs138690285 | NA |
| chr2 | 2.07E+08 | 2.07E+08 | T        | C        | exonic       | NRP2       | synonymous SNV    | 264:exon6:c.T870C:p.N290N,NRP2:NM_201266:exon6:c.1                                               | NA                                              | rs2228639   | NA |
| chr2 | 2.11E+08 | 2.11E+08 | T        | G        | exonic       | ACADL      | nonsynonymous SNV | ACADL:NM_001608:exon9:c.A997C:p.K333Q                                                            | NA                                              | rs2286963   | D  |
| chr2 | 2.16E+08 | 2.16E+08 | G        | A        | exonic       | BARD1      | nonsynonymous SNV | BARD1:NM_000465:exon1:c.C70T:p.P24S                                                              | NA                                              | rs1048108   | B  |
| chr2 | 2.2E+08  | 2.2E+08  | A        | G        | UTR3         | PRKAG3     | NA                | NA                                                                                               | NA                                              | rs6436094   | NA |
| chr2 | 2.24E+08 | 2.24E+08 | T        | C        | exonic       | KCNE4      | synonymous SNV    | KCNE4:NM_080671:exon2:c.T417C:p.P139P                                                            | NA                                              | rs10201907  | NA |
| chr2 | 2.26E+08 | 2.26E+08 | TGG      | -        | UTR5         | NYAP2      | NA                | NA                                                                                               | NA                                              | rs10578238  | NA |
| chr2 | 2.28E+08 | 2.28E+08 | C        | T        | exonic       | COL4A4     | synonymous SNV    | COL4A4:NM_000092:exon42:c.G4080A:p.P1360P                                                        | NA                                              | rs2228556   | NA |
| chr2 | 2.28E+08 | 2.28E+08 | C        | T        | exonic       | COL4A4     | nonsynonymous SNV | COL4A4:NM_000092:exon42:c.G3979A:p.V1327M                                                        | NA                                              | rs2229813   | NA |
| chr2 | 2.28E+08 | 2.28E+08 | G        | A        | exonic       | COL4A4     | nonsynonymous SNV | COL4A4:NM_000092:exon21:c.C1444T:p.P482S                                                         | NA                                              | rs2229814   | B  |
| chr2 | 2.31E+08 | 2.31E+08 | T        | C        | UTR3         | SP140      | NA                | NA                                                                                               | NA                                              | rs933957    | NA |
| chr2 | 2.35E+08 | 2.35E+08 | AAACAAAC | -        | UTR3         | HJURP      | NA                | NA                                                                                               | NA                                              | rs150635580 | NA |
| chr2 | 2.35E+08 | 2.35E+08 | -        | TTAT     | UTR3         | TRPM8      | NA                | NA                                                                                               | NA                                              | rs138810119 | NA |
| chr2 | 2.35E+08 | 2.35E+08 | T        | -        | UTR3         | ARL4C      | NA                | NA                                                                                               | NA                                              | rs11476419  | NA |
| chr2 | 2.39E+08 | 2.39E+08 | C        | A        | exonic       | ESPNL      | synonymous SNV    | ESPNL:NM_194312:exon2:c.C403A:p.R135R                                                            | NA                                              | rs34878344  | NA |
| chr2 | 2.4E+08  | 2.4E+08  | -        | ATAGATAG | UTR3         | HDAC4      | NA                | NA                                                                                               | NA                                              | NA          | NA |
| chr2 | 2.4E+08  | 2.4E+08  | G        | A        | exonic       | HDAC4      | synonymous SNV    | HDAC4:NM_006037:exon21:c.C2565T:p.P855P                                                          | NA                                              | rs1063639   | NA |
| chr2 | 2.41E+08 | 2.41E+08 | C        | T        | exonic       | PRR21      | nonsynonymous SNV | PRR21:NM_001080835:exon1:c.G712A:p.V238I                                                         | NA                                              | rs199895422 | NA |
| chr2 | 2.41E+08 | 2.41E+08 | C        | T        | exonic       | PRR21      | nonsynonymous SNV | PRR21:NM_001080835:exon1:c.G292A:p.V98I                                                          | D=COSM1129269,COSM1129268;OCCURENCE=1(prostate) | rs112152720 | B  |
| chr2 | 2.41E+08 | 2.41E+08 | G        | A        | exonic       | ANKMY1     | nonsynonymous SNV | ANKMY1:NM_016552:exon10:c.C1946T:p.T649M                                                         | NA                                              | rs35044862  | B  |
| chr2 | 2.42E+08 | 2.42E+08 | C        | T        | exonic       | PASK       | nonsynonymous SNV | 52124:exon6:c.G748A:p.V250I,PASK:NM_015148:exon6:c.ID=COSM149119,COSM149120;OCCURENCE=1(stomach) | rs1470414                                       | B           |    |
| chr2 | 2.43E+08 | 2.43E+08 | A        | C        | UTR3         | BOK        | NA                | NA                                                                                               | NA                                              | rs12993567  | NA |
| chr2 | 2.43E+08 | 2.43E+08 | T        | A        | ncRNA_exonic | LOC728323  | NA                | NA                                                                                               | NA                                              | rs1817840   | NA |
| chr3 | 5222488  | 5222488  | -        | \GGGGATA | UTR3         | ARL8B      | NA                | NA                                                                                               | NA                                              | rs143599604 | NA |
| chr3 | 9519364  | 9519364  | T        | -        | UTR3         | SETD5      | NA                | NA                                                                                               | NA                                              | rs58994037  | NA |
| chr3 | 14105964 | 14105964 | T        | C        | ncRNA_exonic | TPRXL      | NA                | NA                                                                                               | NA                                              | NA          | NA |
| chr3 | 15469001 | 15469001 | A        | C        | UTR5         | METTL6     | NA                | NA                                                                                               | NA                                              | rs2290536   | NA |
| chr3 | 18427924 | 18427924 | G        | T        | exonic       | SATB1      | synonymous SNV    | 1462P,SATB1:NM_001195470:exon8:c.C1386A:p.P462P,S/                                               | NA                                              | rs2229261   | NA |
| chr3 | 19988758 | 19988758 | -        | CGG      | UTR5         | RAB5A      | NA                | NA                                                                                               | NA                                              | NA          | NA |
| chr3 | 20212189 | 20212189 | A        | G        | UTR3         | SGOL1      | NA                | NA                                                                                               | NA                                              | rs1052930   | NA |
| chr3 | 33174156 | 33174156 | T        | G        | exonic       | CRTAP      | synonymous SNV    | CRTAP:NM_006371:exon5:c.T1032G:p.T344T                                                           | ID=COSM149349;OCCURENCE=1(stomach)              | rs1135127   | NA |
| chr3 | 33174168 | 33174168 | G        | A        | exonic       | CRTAP      | synonymous SNV    | CRTAP:NM_006371:exon5:c.G1044A:p.S348S                                                           | NA                                              | rs1135128   | NA |
| chr3 | 37028931 | 37028931 | -        | T        | UTR3         | EPM2AIP1   | NA                | NA                                                                                               | NA                                              | rs199570773 | NA |
| chr3 | 38493852 | 38493852 | C        | A        | ncRNA_exonic | ACVR2B-AS1 | NA                | NA                                                                                               | NA                                              | rs3762788   | NA |
| chr3 | 38908944 | 38908944 | T        | C        | exonic       | SCN11A     | synonymous SNV    | SCN11A:NM_014139:exon23:c.A3819G:p.E1273E                                                        | NA                                              | rs148945365 | NA |
| chr3 | 41281460 | 41281460 | C        | T        | UTR3         | CTNNB1     | NA                | NA                                                                                               | NA                                              | NA          | NA |
| chr3 | 41281464 | 41281464 | C        | T        | UTR3         | CTNNB1     | NA                | NA                                                                                               | NA                                              | NA          | NA |
| chr3 | 46945263 | 46945263 | -        | A        | UTR3         | PTH1R      | NA                | NA                                                                                               | NA                                              | NA          | NA |
| chr3 | 49273996 | 49273996 | C        | T        | exonic       | CCDC36     | synonymous SNV    | 1135197:exon3:c.C72T:p.S24S,CCDC36:NM_178173:exon                                                | NA                                              | rs12631989  | NA |
| chr3 | 49315576 | 49315576 | T        | -        | UTR3         | USP4       | NA                | NA                                                                                               | NA                                              | rs11309567  | NA |
| chr3 | 54354510 | 54354510 | T        | C        | exonic       | CACNA2D3   | synonymous SNV    | CACNA2D3:NM_018398:exon3:c.T246C:p.I82I                                                          | NA                                              | rs9879885   | NA |
| chr3 | 58304608 | 58304608 | C        | G        | UTR3         | RPP14      | NA                | NA                                                                                               | NA                                              | rs3210776   | NA |
| chr3 | 59908126 | 59908126 | A        | G        | exonic       | FHIT       | synonymous SNV    | 166243:exon8:c.T294C:p.H98H,FHIT:NM_002012:exon8:c.                                              | ID=COSM149406;OCCURENCE=1(stomach)              | rs1385816   | NA |
| chr3 | 74344356 | 74344356 | T        | G        | exonic       | CNTN3      | synonymous SNV    | CNTN3:NM_020872:exon18:c.A2433C:p.A811A                                                          | NA                                              | rs10490832  | NA |

|      |          |          |          |         |              |              |                   |                                                    |                                                   |             |    |
|------|----------|----------|----------|---------|--------------|--------------|-------------------|----------------------------------------------------|---------------------------------------------------|-------------|----|
| chr3 | 75715734 | 75715734 | G        | A       | ncRNA_exonic | FLJ20518     | NA                | NA                                                 | NA                                                | rs138571914 | NA |
| chr3 | 75716122 | 75716122 | T        | C       | ncRNA_exonic | FLJ20518     | NA                | NA                                                 | NA                                                | rs139598107 | NA |
| chr3 | 75716303 | 75716303 | T        | A       | ncRNA_exonic | FLJ20518     | NA                | NA                                                 | NA                                                | rs150165388 | NA |
| chr3 | 75786288 | 75786288 | A        | G       | exonic       | ZNF717       | nonsynonymous SNV | ZNF717:NM_001128223:exon5:c.T2486C:p.L829P         | DB=COSM1191698;OCCURENCE=1(central_nervous_system | rs147227180 | NA |
| chr3 | 75786298 | 75786298 | T        | C       | exonic       | ZNF717       | nonsynonymous SNV | ZNF717:NM_001128223:exon5:c.A2476G:p.K826E         | NA                                                | rs140045886 | NA |
| chr3 | 75787202 | 75787202 | G        | T       | exonic       | ZNF717       | synonymous SNV    | ZNF717:NM_001128223:exon5:c.C1572A:p.V524V         | NA                                                | rs76713735  | NA |
| chr3 | 75788199 | 75788199 | T        | C       | exonic       | ZNF717       | nonsynonymous SNV | ZNF717:NM_001128223:exon5:c.A575G:p.H192R          | NA                                                | rs146090776 | NA |
| chr3 | 1.13E+08 | 1.13E+08 | A        | -       | UTR3         | GTPBP8       | NA                | NA                                                 | NA                                                | rs200301737 | NA |
| chr3 | 1.19E+08 | 1.19E+08 | C        | G       | exonic       | C3orf30      | nonsynonymous SNV | C3orf30:NM_152539:exon2:c.C1419G:p.D473E           | NA                                                | rs9289122   | B  |
| chr3 | 1.22E+08 | 1.22E+08 | A        | G       | UTR3         | CASR         | NA                | NA                                                 | NA                                                | rs9740      | NA |
| chr3 | 1.24E+08 | 1.24E+08 | T        | C       | exonic       | KALRN        | synonymous SNV    | 4:exon2:c.T243C:p.L81L,KALRN:NM_001024660:exon35:c | NA                                                | rs1660038   | NA |
| chr3 | 1.29E+08 | 1.29E+08 | C        | T       | exonic       | EFCAB12      | nonsynonymous SNV | EFCAB12:NM_207307:exon3:c.G590A:p.R197H            | NA                                                | rs62266958  | NA |
| chr3 | 1.29E+08 | 1.29E+08 | G        | A       | UTR5         | EFCAB12      | NA                | NA                                                 | NA                                                | rs3796391   | NA |
| chr3 | 1.3E+08  | 1.3E+08  | G        | A       | exonic       | ALG1L2       | synonymous SNV    | ALG1L2:NM_001136152:exon2:c.G45A:p.P15P            | NA                                                | rs6804080   | NA |
| chr3 | 1.3E+08  | 1.3E+08  | T        | -       | intronic     | COL6A5       | NA                | NA                                                 | NA                                                | rs11355796  | NA |
| chr3 | 1.36E+08 | 1.36E+08 | G        | A       | UTR3         | MSL2         | NA                | NA                                                 | NA                                                | NA          | NA |
| chr3 | 1.36E+08 | 1.36E+08 | G        | A       | UTR3         | MSL2         | NA                | NA                                                 | NA                                                | rs78145147  | NA |
| chr3 | 1.42E+08 | 1.42E+08 | T        | -       | UTR3         | GK5          | NA                | NA                                                 | NA                                                | rs139089663 | NA |
| chr3 | 1.42E+08 | 1.42E+08 | A        | -       | UTR3         | GK5          | NA                | NA                                                 | NA                                                | rs137909394 | NA |
| chr3 | 1.5E+08  | 1.5E+08  | AAA      | -       | UTR3         | TSC22D2      | NA                | NA                                                 | NA                                                | rs71739355  | NA |
| chr3 | 1.59E+08 | 1.59E+08 | A        | G       | exonic       | MFSD1        | nonsynonymous SNV | 67903:exon7:c.A688G:p.I230V,MFSD1:NM_022736:exon8  | NA                                                | rs3765083   | B  |
| chr3 | 1.65E+08 | 1.65E+08 | C        | T       | UTR3         | BCHE         | NA                | NA                                                 | NA                                                | rs3495      | NA |
| chr3 | 1.67E+08 | 1.67E+08 | T        | A       | exonic       | ZBBX         | nonsynonymous SNV | K160N,ZBBX:NM_001199202:exon9:c.A393T:p.K131N,ZBI  | NA                                                | rs4619784   | P  |
| chr3 | 1.67E+08 | 1.67E+08 | A        | G       | exonic       | WDR49        | nonsynonymous SNV | WDR49:NM_178824:exon14:c.T1952C:p.L651P            | NA                                                | rs13060964  | B  |
| chr3 | 1.71E+08 | 1.71E+08 | A        | G       | exonic       | PLD1         | synonymous SNV    | 381:exon16:c.T1770C:p.R590R,PLD1:NM_002662:exon17: | NA                                                | rs2124147   | NA |
| chr3 | 1.86E+08 | 1.86E+08 | G        | -       | UTR3         | ETV5         | NA                | NA                                                 | NA                                                | rs200001879 | NA |
| chr3 | 1.86E+08 | 1.86E+08 | A        | G       | UTR3         | DGKG         | NA                | NA                                                 | NA                                                | rs13089860  | NA |
| chr3 | 1.86E+08 | 1.86E+08 | T        | G       | UTR3         | TBCCD1       | NA                | NA                                                 | NA                                                | rs4686430   | NA |
| chr3 | 1.87E+08 | 1.87E+08 | C        | T       | UTR3         | RTP4         | NA                | NA                                                 | NA                                                | rs9028      | NA |
| chr3 | 1.88E+08 | 1.88E+08 | G        | A       | ncRNA_exonic | FLJ42393     | NA                | NA                                                 | NA                                                | rs344952    | NA |
| chr3 | 1.94E+08 | 1.94E+08 | G        | A       | UTR3         | CPN2         | NA                | NA                                                 | NA                                                | rs1048996   | NA |
| chr3 | 1.94E+08 | 1.94E+08 | -        | G       | UTR3         | ATP13A3      | NA                | NA                                                 | NA                                                | NA          | NA |
| chr3 | 1.95E+08 | 1.95E+08 | G        | A       | UTR3         | XXYL1        | NA                | NA                                                 | NA                                                | rs2720930   | NA |
| chr3 | 1.95E+08 | 1.95E+08 | -        | GGCG    | UTR3         | APOD         | NA                | NA                                                 | NA                                                | rs146445395 | NA |
| chr3 | 1.95E+08 | 1.95E+08 | T        | G       | UTR3         | APOD         | NA                | NA                                                 | NA                                                | NA          | NA |
| chr3 | 1.96E+08 | 1.96E+08 | C        | T       | exonic       | MUC4         | nonsynonymous SNV | 37D,MUC4:NM_004532:exon3:c.G263A:p.G88D,MUC4:NI    | NA                                                | rs2259292   | NA |
| chr3 | 1.96E+08 | 1.96E+08 | G        | T       | exonic       | MUC4         | nonsynonymous SNV | MUC4:NM_018406:exon2:c.C11200A:p.P3734T            | NA                                                | rs201456607 | NA |
| chr3 | 1.96E+08 | 1.96E+08 | G        | C       | exonic       | MUC4         | synonymous SNV    | MUC4:NM_018406:exon2:c.C10653G:p.T3551T            | NA                                                | NA          | NA |
| chr3 | 1.96E+08 | 1.96E+08 | C        | G       | exonic       | MUC4         | nonsynonymous SNV | MUC4:NM_018406:exon2:c.G9903C:p.E3301D             | NA                                                | NA          | NA |
| chr3 | 1.96E+08 | 1.96E+08 | A        | G       | exonic       | MUC4         | nonsynonymous SNV | MUC4:NM_018406:exon2:c.T9290C:p.V3097A             | NA                                                | rs79582237  | NA |
| chr3 | 1.96E+08 | 1.96E+08 | C        | T       | exonic       | MUC4         | nonsynonymous SNV | MUC4:NM_018406:exon2:c.G8656A:p.A2886T             | NA                                                | rs201497773 | NA |
| chr3 | 1.96E+08 | 1.96E+08 | T        | C       | exonic       | MUC4         | nonsynonymous SNV | MUC4:NM_018406:exon2:c.A8200G:p.T2734A             | NA                                                | NA          | NA |
| chr3 | 1.96E+08 | 1.96E+08 | A        | G       | exonic       | MUC4         | synonymous SNV    | MUC4:NM_018406:exon2:c.T5700C:p.G1900G             | NA                                                | NA          | NA |
| chr3 | 1.96E+08 | 1.96E+08 | A        | G       | exonic       | MUC4         | nonsynonymous SNV | MUC4:NM_018406:exon2:c.T4318C:p.S1440P             | NA                                                | NA          | NA |
| chr3 | 1.96E+08 | 1.96E+08 | A        | G       | exonic       | MUC4         | synonymous SNV    | MUC4:NM_018406:exon2:c.T3996C:p.T1332T             | NA                                                | rs79619815  | NA |
| chr3 | 1.96E+08 | 1.96E+08 | C        | G       | exonic       | MUC4         | nonsynonymous SNV | MUC4:NM_018406:exon2:c.G3981C:p.M1327I             | NA                                                | rs200851738 | NA |
| chr3 | 1.96E+08 | 1.96E+08 | T        | A       | exonic       | MUC4         | synonymous SNV    | MUC4:NM_018406:exon2:c.A3723T:p.A1241A             | NA                                                | NA          | NA |
| chr4 | 844781   | 844781   | G        | A       | exonic       | GAK          | synonymous SNV    | GAK:NM_005255:exon26:c.C3600T:p.T1200T             | ID=COSM287830;OCCURENCE=1(large_intestine)        | rs75072999  | NA |
| chr4 | 860192   | 860192   | A        | G       | exonic       | GAK          | synonymous SNV    | GAK:NM_005255:exon22:c.T3003C:p.S1001S             | NA                                                | rs1064207   | NA |
| chr4 | 1191486  | 1191486  | -        | T       | ncRNA_exonic | LOC100130872 | NA                | NA                                                 | NA                                                | NA          | NA |
| chr4 | 2252201  | 2252201  | C        | T       | UTR3         | MXD4         | NA                | NA                                                 | NA                                                | rs1052682   | NA |
| chr4 | 7044357  | 7044357  | A        | G       | exonic       | CCDC96       | synonymous SNV    | CCDC96:NM_153376:exon1:c.T309C:p.V103V             | NA                                                | rs871133    | NA |
| chr4 | 17634213 | 17634213 | A        | G       | exonic       | FAM184B      | nonsynonymous SNV | FAM184B:NM_015688:exon18:c.T3125C:p.V1042A         | NA                                                | rs6825562   | NA |
| chr4 | 20731213 | 20731213 | -        | TTTAACT | UTR3         | KCNIP4       | NA                | NA                                                 | NA                                                | NA          | NA |
| chr4 | 20731232 | 20731242 | AAATGGAA | -       | UTR3         | KCNIP4       | NA                | NA                                                 | NA                                                | rs151224175 | NA |
| chr4 | 20852244 | 20852244 | A        | G       | exonic       | KCNIP4       | synonymous SNV    | 001035004:exon2:c.T24C:p.P8P,KCNIP4:NM_025221:exor | NA                                                | rs3765122   | NA |
| chr4 | 21846581 | 21846581 | -        | AAA     | ncRNA_exonic | KCNIP4-IT1   | NA                | NA                                                 | NA                                                | NA          | NA |
| chr4 | 31147973 | 31147980 | AAATAAAT | -       | UTR3         | PCDH7        | NA                | NA                                                 | NA                                                | rs145102344 | NA |
| chr4 | 37613930 | 37613930 | G        | A       | UTR3         | RELL1        | NA                | NA                                                 | NA                                                | rs17495047  | NA |
| chr4 | 39451560 | 39451565 | AATAAA   | -       | UTR3         | KLB          | NA                | NA                                                 | NA                                                | rs145759953 | NA |
| chr4 | 39458051 | 39458051 | A        | G       | exonic       | RPL9         | synonymous SNV    | 24921:exon4:c.T366C:p.Y122Y,RPL9:NM_000661:exon5:c | NA                                                | rs1065744   | NA |
| chr4 | 39478946 | 39478946 | C        | T       | UTR3         | LIAS         | NA                | NA                                                 | NA                                                | rs11934814  | NA |

|      |          |          |           |             |              |                     |                   |                                                     |                                      |             |    |
|------|----------|----------|-----------|-------------|--------------|---------------------|-------------------|-----------------------------------------------------|--------------------------------------|-------------|----|
| chr4 | 54876132 | 54876132 | C         | -           | UTR3         | CHIC2               | NA                | NA                                                  | NA                                   | rs68107873  | NA |
| chr4 | 56899377 | 56899377 | A         | G           | UTR3         | CEP135              | NA                | NA                                                  | NA                                   | rs12512313  | NA |
| chr4 | 57326996 | 57326996 | C         | T           | UTR3         | PAICS               | NA                | NA                                                  | NA                                   | rs1140982   | NA |
| chr4 | 57368635 | 57368662 | ATATGTAT, | -           | UTR3         | SRP72               | NA                | NA                                                  | NA                                   | rs200531104 | NA |
| chr4 | 71117016 | 71117016 | T         | G           | UTR3         | CSN3                | NA                | NA                                                  | NA                                   | rs62308392  | NA |
| chr4 | 72435944 | 72435973 | TTCAGCCTC | -           | UTR3         | SLC4A4              | NA                | NA                                                  | NA                                   | NA          | NA |
| chr4 | 76720885 | 76720885 | T         | C           | exonic       | USO1                | unknown           | UNKNOWN                                             | NA                                   | rs13119659  | NA |
| chr4 | 76871270 | 76871270 | C         | A           | UTR3         | SDAD1               | NA                | NA                                                  | NA                                   | NA          | NA |
| chr4 | 77701688 | 77701688 | A         | -           | UTR3         | SHROOM3             | NA                | NA                                                  | NA                                   | rs11325137  | NA |
| chr4 | 88536880 | 88536880 | C         | T           | exonic       | DSPP                | synonymous SNV    | DSPP:NM_014208:exon5:c.C3066T:p.S1022S              | NA                                   | NA          | NA |
| chr4 | 88537180 | 88537180 | T         | C           | exonic       | DSPP                | synonymous SNV    | DSPP:NM_014208:exon5:c.T3366C:p.N1122N              | NA                                   | NA          | NA |
| chr4 | 88537294 | 88537294 | T         | C           | exonic       | DSPP                | synonymous SNV    | DSPP:NM_014208:exon5:c.T3480C:p.S1160S              | NA                                   | NA          | NA |
| chr4 | 91759710 | 91759710 | -         | A           | intronic     | CCSER1              | NA                | NA                                                  | NA                                   | NA          | NA |
| chr4 | 99850451 | 99850451 | T         | -           | UTR5         | EIF4E               | NA                | NA                                                  | NA                                   | NA          | NA |
| chr4 | 1E+08    | 1E+08    | A         | G           | exonic       | ADH1B               | synonymous SNV    | ADH1B:NM_000668:exon6:c.T753C:p.I251I               | NA                                   | rs1789882   | NA |
| chr4 | 1E+08    | 1E+08    | C         | T           | exonic       | ADH1C               | unknown           | UNKNOWN                                             | NA                                   | rs1693425   | NA |
| chr4 | 1E+08    | 1E+08    | -         | T           | UTR3         | TRMT10A             | NA                | NA                                                  | NA                                   | rs149160816 | NA |
| chr4 | 1.11E+08 | 1.11E+08 | T         | C           | exonic       | ENPEP               | nonsynonymous SNV | ENPEP:NM_001977:exon2:c.T653C:p.V218A               | ID=COSM1131302;OCCURENCE=1(prostate) | rs1126483   | B  |
| chr4 | 1.15E+08 | 1.15E+08 | CAAATTAGC | -           | UTR3         | ARSJ                | NA                | NA                                                  | NA                                   | NA          | NA |
| chr4 | 1.23E+08 | 1.23E+08 | T         | C           | UTR3         | TMEM155             | NA                | NA                                                  | NA                                   | rs4342205   | NA |
| chr4 | 1.24E+08 | 1.24E+08 | G         | A           | UTR3         | SPATA5              | NA                | NA                                                  | NA                                   | rs2132078   | NA |
| chr4 | 1.47E+08 | 1.47E+08 | A         | -           | UTR3         | MMAA                | NA                | NA                                                  | NA                                   | rs33978754  | NA |
| chr4 | 1.54E+08 | 1.54E+08 | T         | G           | exonic       | TRIM2               | synonymous SNV    | 30067:exon3:c.T324G:p.T108T,TRIM2:NM_015271:exon3   | NA                                   | rs2289409   | NA |
| chr4 | 1.56E+08 | 1.56E+08 | A         | G           | UTR5         | MAP9                | NA                | NA                                                  | ID=COSN404819;OCCURENCE=1(lung)      | rs17377679  | NA |
| chr4 | 1.6E+08  | 1.6E+08  | C         | T           | UTR5         | PPID                | NA                | NA                                                  | NA                                   | rs2070629   | NA |
| chr4 | 1.6E+08  | 1.6E+08  | A         | -           | UTR3         | FNIP2               | NA                | NA                                                  | NA                                   | rs11340968  | NA |
| chr4 | 1.76E+08 | 1.76E+08 | G         | T           | UTR5         | ADAM29              | NA                | NA                                                  | NA                                   | rs7689299   | NA |
| chr4 | 1.76E+08 | 1.76E+08 | C         | T           | UTR5         | ADAM29              | NA                | NA                                                  | NA                                   | rs62334419  | NA |
| chr4 | 1.77E+08 | 1.77E+08 | A         | -           | UTR3         | WDR17               | NA                | NA                                                  | NA                                   | rs70962454  | NA |
| chr4 | 1.77E+08 | 1.77E+08 | A         | G           | exonic       | SPATA4              | synonymous SNV    | SPATA4:NM_144644:exon4:c.T510C:p.Y170Y              | NA                                   | rs2291244   | NA |
| chr4 | 1.84E+08 | 1.84E+08 | G         | T           | exonic       | WWC2                | nonsynonymous SNV | WWC2:NM_024949:exon16:c.G2446T:p.V816F              | NA                                   | rs11734376  | NA |
| chr4 | 1.86E+08 | 1.86E+08 | -         | ATT         | UTR3         | CASP3               | NA                | NA                                                  | NA                                   | rs4647696   | NA |
| chr4 | 1.86E+08 | 1.86E+08 | G         | A           | exonic       | CCDC111             | synonymous SNV    | CCDC111:NM_152683:exon8:c.G948A:p.Q316Q             | NA                                   | rs34985821  | NA |
| chr5 | 796054   | 796055   | CT        | -           | UTR3         | ZDHHC11             | NA                | NA                                                  | NA                                   | NA          | NA |
| chr5 | 796106   | 796106   | T         | C           | UTR3         | ZDHHC11             | NA                | NA                                                  | NA                                   | NA          | NA |
| chr5 | 1222213  | 1222214  | TG        | -           | UTR3         | SLC6A19             | NA                | NA                                                  | NA                                   | rs35482871  | NA |
| chr5 | 10657091 | 10657091 | -         | AA          | UTR3         | ANKRD33B            | NA                | NA                                                  | NA                                   | NA          | NA |
| chr5 | 10972889 | 10972889 | T         | -           | UTR3         | CTNND2              | NA                | NA                                                  | NA                                   | rs70947237  | NA |
| chr5 | 13701536 | 13701536 | T         | C           | exonic       | DNAH5               | nonsynonymous SNV | DNAH5:NM_001369:exon77:c.A13348G:p.I4450V           | NA                                   | rs3734110   | B  |
| chr5 | 16673975 | 16673975 | C         | G           | exonic       | MYO10               | nonsynonymous SNV | MYO10:NM_012334:exon36:c.G4988C:p.S1663T            | NA                                   | rs25901     | NA |
| chr5 | 31317952 | 31317952 | T         | C           | exonic       | CDH6                | synonymous SNV    | CDH6:NM_004932:exon11:c.T1803C:p.H601H              | NA                                   | rs2229575   | NA |
| chr5 | 40964885 | 40964885 | A         | T           | exonic       | C7                  | nonsynonymous SNV | C7:NM_000587:exon14:c.A1792T:p.T598S                | NA                                   | rs60714178  | NA |
| chr5 | 42756940 | 42756940 | C         | T           | UTR5         | CCDC152             | NA                | NA                                                  | NA                                   | rs3797310   | NA |
| chr5 | 55206444 | 55206444 | G         | A           | exonic       | IL31RA              | nonsynonymous SNV | i29N,IL31RA:NM_139017:exon12:c.G1586A:p.S529N,IL31  | NA                                   | rs161704    | P  |
| chr5 | 59825300 | 59825300 | T         | C           | ncRNA_exonic | PART1               | NA                | NA                                                  | NA                                   | rs26949     | NA |
| chr5 | 59842971 | 59842971 | A         | G           | ncRNA_exonic | PART1               | NA                | NA                                                  | NA                                   | rs153152    | NA |
| chr5 | 64963082 | 64963082 | -         | CT          | UTR3         | SGTB                | NA                | NA                                                  | NA                                   | rs2067306   | NA |
| chr5 | 64963466 | 64963469 | TTTG      | -           | UTR3         | SGTB                | NA                | NA                                                  | NA                                   | rs33916729  | NA |
| chr5 | 68739819 | 68739819 | G         | A           | intergenic   | !(dist=1929),OCLN(c | NA                | NA                                                  | NA                                   | NA          | NA |
| chr5 | 75948650 | 75948650 | A         | G           | exonic       | IQGAP2              | nonsynonymous SNV | IQGAP2:NM_006633:exon18:c.A2170G:p.I724V            | NA                                   | rs2431363   | B  |
| chr5 | 76003258 | 76003258 | C         | T           | UTR3         | IQGAP2              | NA                | NA                                                  | NA                                   | rs464494    | NA |
| chr5 | 78181577 | 78181577 | T         | C           | exonic       | ARSB                | synonymous SNV    | 46:exon5:c.A972G:p.G324G,ARSB:NM_198709:exon6:c.A   | NA                                   | rs72762973  | NA |
| chr5 | 79048562 | 79048562 | C         | T           | exonic       | CMYA5               | synonymous SNV    | CMYA5:NM_153610:exon6:c.C11055T:p.F3685F            | ID=COSM149872;OCCURENCE=1(stomach)   | rs1366272   | NA |
| chr5 | 82936729 | 82936729 | T         | -           | UTR3         | HAPLN1              | NA                | NA                                                  | NA                                   | NA          | NA |
| chr5 | 95115959 | 95115959 | C         | T           | exonic       | RHOBTB3             | nonsynonymous SNV | RHOBTB3:NM_014899:exon9:c.C1286T:p.T429M            | NA                                   | rs41276257  | P  |
| chr5 | 96111228 | 96111228 | A         | G           | UTR3         | ERAP1               | NA                | NA                                                  | NA                                   | rs3198304   | NA |
| chr5 | 96111801 | 96111801 | -         | TG          | UTR3         | ERAP1               | NA                | NA                                                  | NA                                   | rs148692674 | NA |
| chr5 | 96111927 | 96111927 | -         | .CATTTCATG, | UTR3         | ERAP1               | NA                | NA                                                  | NA                                   | rs142866043 | NA |
| chr5 | 96322360 | 96322360 | G         | A           | exonic       | LNPEP               | nonsynonymous SNV | i75:exon4:c.G1117A:p.V373I,LNPEP:NM_175920:exon4:c. | NA                                   | rs41276279  | B  |
| chr5 | 96429323 | 96429323 | -         | A           | UTR3         | LIX1                | NA                | NA                                                  | NA                                   | NA          | NA |
| chr5 | 1.22E+08 | 1.22E+08 | .CACACACA | -           | UTR3         | SNX2                | NA                | NA                                                  | NA                                   | rs138443824 | NA |
| chr5 | 1.26E+08 | 1.26E+08 | -         | TTT         | UTR3         | ALDH7A1             | NA                | NA                                                  | NA                                   | NA          | NA |

|      |          |          |          |     |                |                    |                         |                                                    |                                    |             |    |
|------|----------|----------|----------|-----|----------------|--------------------|-------------------------|----------------------------------------------------|------------------------------------|-------------|----|
| chr5 | 1.28E+08 | 1.28E+08 | G        | C   | exonic         | FBN2               | synonymous SNV          | FBN2:NM_001999:exon1:c.C183G:p.P61P                | NA                                 | rs73348287  | NA |
| chr5 | 1.31E+08 | 1.31E+08 | ACACACAC | -   | UTR3           | LYRM7              | NA                      | NA                                                 | NA                                 | rs36230431  | NA |
| chr5 | 1.31E+08 | 1.31E+08 | G        | T   | UTR3           | CDC42SE2           | NA                      | NA                                                 | NA                                 | NA          | NA |
| chr5 | 1.32E+08 | 1.32E+08 | C        | T   | exonic         | SLC22A4            | nonsynonymous SNV       | SLC22A4:NM_003059:exon9:c.C1507T:p.L503F           | NA                                 | rs1050152   | B  |
| chr5 | 1.32E+08 | 1.32E+08 | A        | G   | UTR3           | UQCRQ              | NA                      | NA                                                 | NA                                 | rs17166297  | NA |
| chr5 | 1.32E+08 | 1.32E+08 | G        | A   | UTR3           | UQCRQ              | NA                      | NA                                                 | NA                                 | rs17624157  | NA |
| chr5 | 1.36E+08 | 1.36E+08 | -        | AA  | UTR3           | SMAD5              | NA                      | NA                                                 | NA                                 | NA          | NA |
| chr5 | 1.37E+08 | 1.37E+08 | G        | A   | exonic         | PKD2L2             | nonsynonymous SNV       | 8448:exon8:c.G1144A:p.V382I,PKD2L2:NM_014386:exon1 | NA                                 | rs1880458   | B  |
| chr5 | 1.39E+08 | 1.39E+08 | T        | A   | UTR5           | MATR3              | NA                      | NA                                                 | NA                                 | rs12153162  | NA |
| chr5 | 1.41E+08 | 1.41E+08 | A        | C   | UTR3           | PCDHB6             | NA                      | NA                                                 | NA                                 | rs56172324  | NA |
| chr5 | 1.41E+08 | 1.41E+08 | C        | T   | UTR3           | PCDHB9             | NA                      | NA                                                 | NA                                 | rs2907325   | NA |
| chr5 | 1.44E+08 | 1.44E+08 | T        | -   | UTR3           | YIPF5              | NA                      | NA                                                 | NA                                 | rs144356469 | NA |
| chr5 | 1.45E+08 | 1.45E+08 | C        | T   | exonic         | SH3RF2             | nonsynonymous SNV       | SH3RF2:NM_152550:exon5:c.C799T:p.R267C             | NA                                 | rs758037    | D  |
| chr5 | 1.46E+08 | 1.46E+08 | G        | A   | exonic         | LARS               | synonymous SNV          | LARS:NM_020117:exon28:c.C2889T:p.N963N             | NA                                 | rs11540216  | NA |
| chr5 | 1.46E+08 | 1.46E+08 | G        | A   | exonic         | LARS               | synonymous SNV          | LARS:NM_020117:exon19:c.C1747T:p.L583L             | NA                                 | rs11540217  | NA |
| chr5 | 1.46E+08 | 1.46E+08 | A        | G   | exonic         | TCERG1             | synonymous SNV          | 36:exon21:c.A3057G:p.S1019S,TCERG1:NM_006706:exon  | NA                                 | rs4705103   | NA |
| chr5 | 1.51E+08 | 1.51E+08 | A        | G   | exonic         | GM2A               | nonsynonymous SNV       | 35:exon2:c.A205G:p.M69V,GM2A:NM_001167607:exon2    | NA                                 | rs153478    | B  |
| chr5 | 1.51E+08 | 1.51E+08 | G        | A   | exonic         | SLC36A2            | synonymous SNV          | SLC36A2:NM_181776:exon2:c.C187T:p.L63L             | NA                                 | rs192192    | NA |
| chr5 | 1.54E+08 | 1.54E+08 | C        | T   | UTR3           | FAXDC2             | NA                      | NA                                                 | NA                                 | rs4865      | NA |
| chr5 | 1.54E+08 | 1.54E+08 | C        | T   | UTR3           | MRPL22             | NA                      | NA                                                 | NA                                 | rs286595    | NA |
| chr5 | 1.59E+08 | 1.59E+08 | A        | -   | UTR5           | EBF1               | NA                      | NA                                                 | NA                                 | rs5872586   | NA |
| chr5 | 1.6E+08  | 1.6E+08  | -        | A   | UTR3           | PWWP2A             | NA                      | NA                                                 | NA                                 | NA          | NA |
| chr5 | 1.72E+08 | 1.72E+08 | C        | T   | exonic         | STK10              | synonymous SNV          | STK10:NM_005990:exon6:c.G756A:p.S252S              | NA                                 | rs2306962   | NA |
| chr5 | 1.75E+08 | 1.75E+08 | G        | A   | exonic         | THOC3              | synonymous SNV          | THOC3:NM_032361:exon2:c.C357T:p.S119S              | NA                                 | rs200408233 | NA |
| chr5 | 1.76E+08 | 1.76E+08 | A        | G   | UTR3           | TSPAN17            | NA                      | NA                                                 | NA                                 | NA          | NA |
| chr5 | 1.77E+08 | 1.77E+08 | A        | C   | intronic       | FAM193B            | NA                      | NA                                                 | NA                                 | NA          | NA |
| chr5 | 1.78E+08 | 1.78E+08 | T        | C   | exonic         | RMND5B             | synonymous SNV          | RMND5B:NM_022762:exon9:c.T888C:p.P296P             | NA                                 | rs61751561  | NA |
| chr5 | 1.78E+08 | 1.78E+08 | T        | C   | exonic         | ZNF354B            | synonymous SNV          | ZNF354B:NM_058230:exon4:c.T243C:p.G81G             | ID=COSM150026;OCCURENCE=1(stomach) | rs11952817  | NA |
| chr5 | 1.79E+08 | 1.79E+08 | G        | A   | exonic         | SQSTM1             | synonymous SNV          | R,SQSTM1:NM_001142298:exon7:c.G684A:p.R228R,SQST   | NA                                 | rs4797      | NA |
| chr5 | 1.8E+08  | 1.8E+08  | A        | G   | intronic       | ZFP62              | NA                      | NA                                                 | NA                                 | rs2127380   | NA |
| chr6 | 6007196  | 6007196  | G        | -   | UTR5           | NRN1               | NA                      | NA                                                 | NA                                 | rs11285278  | NA |
| chr6 | 7283735  | 7283735  | C        | T   | UTR3           | SSR1               | NA                      | NA                                                 | NA                                 | rs111496266 | NA |
| chr6 | 7283759  | 7283759  | T        | C   | UTR3           | SSR1               | NA                      | NA                                                 | NA                                 | rs9505115   | NA |
| chr6 | 7288297  | 7288297  | G        | A   | UTR3           | SSR1               | NA                      | NA                                                 | NA                                 | rs8955      | NA |
| chr6 | 7289958  | 7289958  | CA       | -   | UTR3           | SSR1               | NA                      | NA                                                 | NA                                 | rs16740     | NA |
| chr6 | 7576527  | 7576527  | G        | A   | exonic         | DSP                | synonymous SNV          | 144:exon19:c.G2631A:p.R877R,DSP:NM_004415:exon19:c | NA                                 | rs1016835   | NA |
| chr6 | 7611993  | 7611998  | TTTCTG   | -   | UTR3           | SNRNP48            | NA                      | NA                                                 | NA                                 | rs146960918 | NA |
| chr6 | 11714214 | 11714215 | AA       | -   | UTR3           | ADTRP              | NA                      | NA                                                 | NA                                 | NA          | NA |
| chr6 | 13579828 | 13579828 | A        | C   | UTR5           | SIRT5              | NA                      | NA                                                 | NA                                 | rs2804911   | NA |
| chr6 | 15521302 | 15521302 | -        | AAA | UTR3           | JARID2             | NA                      | NA                                                 | NA                                 | rs34405141  | NA |
| chr6 | 15523807 | 15523807 | T        | A   | UTR3           | DTNBP1             | NA                      | NA                                                 | NA                                 | rs55944541  | NA |
| chr6 | 16327864 | 16327864 | -        | TGC | exonic         | ATXN1              | nonframeshift insertion | 8_679insGCA:p.H226delinsQH,ATXN1:NM_000332:exon8   | NA                                 | NA          | NA |
| chr6 | 17799575 | 17799575 | A        | G   | exonic         | KIF13A             | synonymous SNV          | 367:exon22:c.T2712C:p.A904A,KIF13A:NM_001105568:ex | NA                                 | rs3734235   | NA |
| chr6 | 18467582 | 18467582 | A        | G   | UTR3           | RNF144B            | NA                      | NA                                                 | NA                                 | rs531972    | NA |
| chr6 | 20534770 | 20534770 | C        | T   | UTR5           | CDKAL1             | NA                      | NA                                                 | NA                                 | NA          | NA |
| chr6 | 21201493 | 21201493 | G        | A   | exonic         | CDKAL1             | synonymous SNV          | CDKAL1:NM_017774:exon15:c.G1536A:p.S512S           | NA                                 | rs9465994   | NA |
| chr6 | 21594175 | 21594175 | C        | T   | UTR5           | SOX4               | NA                      | NA                                                 | NA                                 | NA          | NA |
| chr6 | 21597712 | 21597712 | A        | T   | UTR3           | SOX4               | NA                      | NA                                                 | NA                                 | NA          | NA |
| chr6 | 24805465 | 24805466 | AA       | -   | UTR3           | FAM65B             | NA                      | NA                                                 | NA                                 | rs67150453  | NA |
| chr6 | 29640095 | 29640111 | AAATAAAT | -   | UTR3           | MOG                | NA                      | NA                                                 | NA                                 | NA          | NA |
| chr6 | 29867070 | 29867070 | T        | A   | intergenic     | st=8214),HCG4B(dis | NA                      | NA                                                 | NA                                 | rs9259499   | NA |
| chr6 | 29867247 | 29867247 | A        | C   | intergenic     | st=8391),HCG4B(dis | NA                      | NA                                                 | NA                                 | rs3128995   | NA |
| chr6 | 29911970 | 29911970 | G        | A   | exonic         | HLA-A              | nonsynonymous SNV       | 12758:exon4:c.G691A:p.G231S,HLA-A:NM_002116:exon4: | NA                                 | rs1059578   | B  |
| chr6 | 29912087 | 29912087 | G        | T   | exonic         | HLA-A              | nonsynonymous SNV       | 12758:exon4:c.G808T:p.A270S,HLA-A:NM_002116:exon4: | NA                                 | rs1059632   | B  |
| chr6 | 30078330 | 30078330 | C        | T   | exonic         | TRIM31             | synonymous SNV          | TRIM31:NM_007028:exon4:c.G639A:p.A213A             | NA                                 | rs2239529   | NA |
| chr6 | 30232538 | 30232538 | G        | T   | ncRNA_exonic   | HLA-L              | NA                      | NA                                                 | NA                                 | rs28780091  | NA |
| chr6 | 30232672 | 30232672 | C        | T   | ncRNA_exonic   | HLA-L              | NA                      | NA                                                 | NA                                 | rs3129701   | NA |
| chr6 | 30954334 | 30954334 | C        | A   | exonic         | MUC21              | nonsynonymous SNV       | MUC21:NM_001010909:exon2:c.C382A:p.P128T           | ID=COSM1186994;OCCURENCE=1(lung)   | rs143481246 | NA |
| chr6 | 31026534 | 31026534 | C        | T   | ncRNA_intronic | HCG22              | NA                      | NA                                                 | NA                                 | rs2523847   | NA |
| chr6 | 31088202 | 31088202 | A        | G   | UTR5           | CDSN               | NA                      | NA                                                 | NA                                 | rs2302399   | NA |
| chr6 | 31237767 | 31237767 | T        | C   | exonic         | HLA-C              | nonsynonymous SNV       | 3042:exon5:c.A991G:p.M331V,HLA-C:NM_002117:exon5:  | NA                                 | rs1130935   | B  |
| chr6 | 31237774 | 31237774 | G        | C   | exonic         | HLA-C              | synonymous SNV          | 3042:exon5:c.C984G:p.V328V,HLA-C:NM_002117:exon5:  | NA                                 | rs41540512  | NA |

|      |          |          |     |          |              |          |                        |                                                   |                                                  |             |    |
|------|----------|----------|-----|----------|--------------|----------|------------------------|---------------------------------------------------|--------------------------------------------------|-------------|----|
| chr6 | 31905130 | 31905130 | G   | A        | exonic       | C2       | synonymous SNV         | .A127A,C2:NM_001145903:exon6:c.G627A:p.A209A,C2:N | NA                                               | rs1042663   | NA |
| chr6 | 32714901 | 32714901 | C   | T        | downstream   | HLA-DQA2 | NA                     | NA                                                | NA                                               | rs9276442   | NA |
| chr6 | 33037419 | 33037419 | G   | A        | exonic       | HLA-DPA1 | synonymous SNV         | ,HLA-DPA1:NM_001242524:exon3:c.C345T;p.N115N,HLA  | NA                                               | rs1126543   | NA |
| chr6 | 33037424 | 33037424 | T   | C        | exonic       | HLA-DPA1 | nonsynonymous SNV      | ,HLA-DPA1:NM_001242524:exon3:c.A340G:p.T114A,HLA  | NA                                               | rs1126542   | B  |
| chr6 | 33037639 | 33037639 | G   | A        | exonic       | HLA-DPA1 | nonsynonymous SNV      | v,HLA-DPA1:NM_001242524:exon3:c.C125T:p.A42V,HLA- | ID=COSM328641;OCCURENCE=4(kidney)                | rs1126534   | B  |
| chr6 | 33037640 | 33037640 | C   | T        | exonic       | HLA-DPA1 | nonsynonymous SNV      | T,HLA-DPA1:NM_001242524:exon3:c.G124A:p.A42T,HLA- | NA                                               | rs1126533   | B  |
| chr6 | 33054331 | 33054331 | T   | C        | UTR3         | HLA-DPB1 | NA                     | NA                                                | NA                                               | rs1126723   | NA |
| chr6 | 33054550 | 33054550 | G   | A        | UTR3         | HLA-DPB1 | NA                     | NA                                                | NA                                               | rs931       | NA |
| chr6 | 33054552 | 33054552 | C   | G        | UTR3         | HLA-DPB1 | NA                     | NA                                                | NA                                               | rs928       | NA |
| chr6 | 33179686 | 33179686 | T   | G        | exonic       | RING1    | synonymous SNV         | RING1:NM_002931:exon6:c.T1026G:p.G342G            | NA                                               | NA          | NA |
| chr6 | 35549193 | 35549193 | -   | CATGGTGA | UTR3         | FKBP5    | NA                     | NA                                                | NA                                               | NA          | NA |
| chr6 | 39048491 | 39048491 | A   | C        | exonic       | GLP1R    | synonymous SNV         | GLP1R:NM_002062:exon12:c.A1200C:p.I400I           | NA                                               | rs1126476   | NA |
| chr6 | 43586698 | 43586698 | -   | G        | UTR3         | POLH     | NA                     | NA                                                | NA                                               | NA          | NA |
| chr6 | 45517740 | 45517741 | TT  | -        | UTR3         | RUNX2    | NA                     | NA                                                | NA                                               | NA          | NA |
| chr6 | 46726915 | 46726915 | C   | A        | UTR3         | ANKRD66  | NA                     | NA                                                | NA                                               | rs9472840   | NA |
| chr6 | 52360331 | 52360331 | G   | A        | UTR3         | EFHC1    | NA                     | NA                                                | NA                                               | rs3789771   | NA |
| chr6 | 57512775 | 57512775 | T   | G        | UTR3         | PRIM2    | NA                     | NA                                                | NA                                               | rs7773110   | NA |
| chr6 | 57512779 | 57512779 | G   | T        | UTR3         | PRIM2    | NA                     | NA                                                | NA                                               | rs76296076  | NA |
| chr6 | 57512903 | 57512903 | C   | A        | UTR3         | PRIM2    | NA                     | NA                                                | NA                                               | rs75209982  | NA |
| chr6 | 57513126 | 57513126 | C   | G        | UTR3         | PRIM2    | NA                     | NA                                                | NA                                               | rs56375552  | NA |
| chr6 | 57513182 | 57513182 | A   | G        | UTR3         | PRIM2    | NA                     | NA                                                | NA                                               | rs1801400   | NA |
| chr6 | 87993555 | 87993555 | T   | -        | UTR3         | GJB7     | NA                     | NA                                                | NA                                               | NA          | NA |
| chr6 | 89888744 | 89888744 | C   | T        | exonic       | GABRR1   | synonymous SNV         | :exon10:c.G1185A:p.A395A,GABRR1:NM_001256704:exo  | NA                                               | rs1796743   | NA |
| chr6 | 97592942 | 97592942 | -   | C        | ncRNA_UTR3   | MMS22L   | NA                     | NA                                                | NA                                               | NA          | NA |
| chr6 | 99956560 | 99956560 | T   | C        | exonic       | USP45    | nonsynonymous SNV      | USP45:NM_001080481:exon3:c.A199G:p.K67E           | ID=COSM150144;OCCURENCE=1(stomach)               | rs7744845   | D  |
| chr6 | 1.07E+08 | 1.07E+08 | G   | A        | UTR5         | RTN4IP1  | NA                     | NA                                                | NA                                               | rs9384625   | NA |
| chr6 | 1.07E+08 | 1.07E+08 | AA  | -        | UTR3         | BEND3    | NA                     | NA                                                | NA                                               | rs200868848 | NA |
| chr6 | 1.08E+08 | 1.08E+08 | T   | G        | UTR3         | SEC63    | NA                     | NA                                                | NA                                               | rs592989    | NA |
| chr6 | 1.1E+08  | 1.1E+08  | G   | C        | UTR3         | PPIL6    | NA                     | NA                                                | NA                                               | rs746794    | NA |
| chr6 | 1.12E+08 | 1.12E+08 | T   | A        | UTR3         | LAMA4    | NA                     | NA                                                | NA                                               | rs7758715   | NA |
| chr6 | 1.12E+08 | 1.12E+08 | C   | T        | UTR3         | LAMA4    | NA                     | NA                                                | NA                                               | rs7738331   | NA |
| chr6 | 1.3E+08  | 1.3E+08  | T   | G        | UTR3         | L3MBTL3  | NA                     | NA                                                | NA                                               | NA          | NA |
| chr6 | 1.33E+08 | 1.33E+08 | A   | G        | ncRNA_exonic | VNN3     | NA                     | NA                                                | NA                                               | rs2294759   | NA |
| chr6 | 1.35E+08 | 1.35E+08 | -   | T        | UTR3         | HBS1L    | NA                     | NA                                                | NA                                               | NA          | NA |
| chr6 | 1.39E+08 | 1.39E+08 | AA  | -        | UTR3         | NHSL1    | NA                     | NA                                                | NA                                               | NA          | NA |
| chr6 | 1.39E+08 | 1.39E+08 | C   | T        | exonic       | CCDC28A  | synonymous SNV         | CCDC28A:NM_015439:exon1:c.C126T:p.S42S            | NA                                               | rs11154999  | NA |
| chr6 | 1.44E+08 | 1.44E+08 | A   | G        | UTR3         | ADAT2    | NA                     | NA                                                | NA                                               | rs9496619   | NA |
| chr6 | 1.51E+08 | 1.51E+08 | A   | G        | UTR3         | MTHFD1L  | NA                     | NA                                                | NA                                               | rs7646      | NA |
| chr6 | 1.51E+08 | 1.51E+08 | G   | A        | UTR3         | MTHFD1L  | NA                     | NA                                                | NA                                               | rs7543      | NA |
| chr6 | 1.54E+08 | 1.54E+08 | C   | T        | exonic       | OPRM1    | synonymous SNV         | OPRM1:NM_001008505:exon4:c.C1333T:p.L445L         | NA                                               | rs562859    | NA |
| chr6 | 1.55E+08 | 1.55E+08 | G   | A        | exonic       | TIAM2    | synonymous SNV         | TIAM2:NM_012454:exon7:c.G2034A:p.Q678Q            | NA                                               | rs1032141   | NA |
| chr6 | 1.59E+08 | 1.59E+08 | G   | A        | UTR3         | GTF2H5   | NA                     | NA                                                | NA                                               | rs9457163   | NA |
| chr6 | 1.61E+08 | 1.61E+08 | C   | T        | exonic       | SLC22A2  | synonymous SNV         | SLC22A2:NM_003058:exon10:c.G1506A:p.V502V         | NA                                               | rs316003    | NA |
| chr6 | 1.62E+08 | 1.62E+08 | G   | T        | UTR3         | PARK2    | NA                     | NA                                                | NA                                               | rs68121389  | NA |
| chr6 | 1.67E+08 | 1.67E+08 | T   | C        | UTR5         | T        | NA                     | NA                                                | NA                                               | rs3099266   | NA |
| chr6 | 1.68E+08 | 1.68E+08 | G   | C        | UTR5         | CCR6     | NA                     | NA                                                | NA                                               | rs1012656   | NA |
| chr6 | 1.68E+08 | 1.68E+08 | T   | C        | exonic       | TCP10L2  | synonymous SNV         | TCP10L2:NM_001145121:exon8:c.T1029C:p.H343H       | NA                                               | rs202096111 | NA |
| chr6 | 1.68E+08 | 1.68E+08 | G   | A        | exonic       | FRMD1    | synonymous SNV         | FRMD1:NM_024919:exon1:c.C171T:p.L57L              | NA                                               | rs34054991  | NA |
| chr6 | 1.7E+08  | 1.7E+08  | C   | T        | exonic       | THBS2    | synonymous SNV         | THBS2:NM_003247:exon6:c.G777A:p.S259S             | NA                                               | rs61730651  | NA |
| chr7 | 537560   | 537560   | T   | A        | UTR3         | PDGFA    | NA                     | NA                                                | NA                                               | NA          | NA |
| chr7 | 2567705  | 2567705  | A   | G        | UTR3         | LFNG     | NA                     | NA                                                | NA                                               | NA          | NA |
| chr7 | 2567715  | 2567715  | T   | G        | UTR3         | LFNG     | NA                     | NA                                                | NA                                               | NA          | NA |
| chr7 | 9673930  | 9673930  | G   | -        | ncRNA_exonic | PER4     | NA                     | NA                                                | NA                                               | rs5882228   | NA |
| chr7 | 9675063  | 9675063  | C   | A        | ncRNA_exonic | PER4     | NA                     | NA                                                | NA                                               | NA          | NA |
| chr7 | 12370657 | 12370657 | A   | G        | UTR3         | VWDE     | NA                     | NA                                                | NA                                               | rs2253353   | NA |
| chr7 | 12370703 | 12370703 | T   | -        | UTR3         | VWDE     | NA                     | NA                                                | NA                                               | rs3217131   | NA |
| chr7 | 12370794 | 12370794 | T   | C        | UTR3         | VWDE     | NA                     | NA                                                | NA                                               | rs1059002   | NA |
| chr7 | 15725798 | 15725800 | TGG | -        | exonic       | MEOX2    | nonframeshift deletion | MEOX2:NM_005924:exon1:c.228_230del:p.76_77del     | ID=COSM150907;OCCURENCE=1(stomach),1(oesophagus) | rs113582077 | NA |
| chr7 | 15726117 | 15726117 | -   | TT       | UTR5         | MEOX2    | NA                     | NA                                                | NA                                               | NA          | NA |
| chr7 | 15726129 | 15726129 | A   | C        | UTR5         | MEOX2    | NA                     | NA                                                | NA                                               | rs11975534  | NA |
| chr7 | 16666759 | 16666759 | G   | C        | exonic       | ANKMY2   | synonymous SNV         | ANKMY2:NM_020319:exon3:c.C177G:p.L59L             | NA                                               | rs11531477  | NA |
| chr7 | 21599233 | 21599233 | C   | T        | exonic       | DNAH11   | synonymous SNV         | DNAH11:NM_001277115:exon4:c.C705T:p.N235N         | NA                                               | rs10950854  | NA |

|      |          |          |    |    |                |              |                   |                                                                     |                                      |             |    |
|------|----------|----------|----|----|----------------|--------------|-------------------|---------------------------------------------------------------------|--------------------------------------|-------------|----|
| chr7 | 23531029 | 23531029 | -  | AA | ncRNA_exonic   | RPS2P32      | NA                | NA                                                                  | NA                                   | NA          | NA |
| chr7 | 25219341 | 25219341 | C  | T  | UTR5           | C7orf31      | NA                | NA                                                                  | NA                                   | rs117565579 | NA |
| chr7 | 35131355 | 35131355 | -  | TG | ncRNA_intronic | DPY19L2P1    | NA                | NA                                                                  | NA                                   | rs146160027 | NA |
| chr7 | 38725698 | 38725698 | A  | C  | ncRNA_exonic   | FAM183B      | NA                | NA                                                                  | NA                                   | NA          | NA |
| chr7 | 44842433 | 44842434 | AA | -  | UTR3           | PPIA         | NA                | NA                                                                  | NA                                   | rs17860097  | NA |
| chr7 | 44868971 | 44868971 | G  | A  | UTR3           | H2AFV        | NA                | NA                                                                  | NA                                   | rs66566005  | NA |
| chr7 | 45123457 | 45123457 | C  | T  | exonic         | NACAD        | synonymous SNV    | NACAD:NM_001146334:exon2:c.G2322A:p.S774S                           | NA                                   | rs62457076  | NA |
| chr7 | 65159983 | 65159983 | A  | G  | ncRNA_exonic   | INTS4L2      | NA                | NA                                                                  | NA                                   | rs147104756 | NA |
| chr7 | 73818404 | 73818404 | C  | T  | UTR3           | CLIP2        | NA                | NA                                                                  | NA                                   | rs2240436   | NA |
| chr7 | 75165018 | 75165018 | G  | A  | UTR3           | HIP1         | NA                | NA                                                                  | NA                                   | rs1167829   | NA |
| chr7 | 76669085 | 76669085 | T  | A  | ncRNA_exonic   | LOC100132832 | NA                | NA                                                                  | ID=COSN405014;OCCURENCE=1(lung)      | NA          | NA |
| chr7 | 91875204 | 91875204 | T  | C  | UTR5           | KRIT1        | NA                | NA                                                                  | NA                                   | NA          | NA |
| chr7 | 92775019 | 92775019 | T  | C  | UTR5           | SAMD9L       | NA                | NA                                                                  | NA                                   | rs28662     | NA |
| chr7 | 98792835 | 98792835 | G  | A  | exonic         | KPNA7        | synonymous SNV    | KPNA7:NM_001145715:exon4:c.C411T:p.A137A                            | NA                                   | rs61751722  | NA |
| chr7 | 1E+08    | 1E+08    | T  | C  | exonic         | ZAN          | unknown           | UNKNOWN                                                             | NA                                   | NA          | NA |
| chr7 | 1.01E+08 | 1.01E+08 | C  | G  | exonic         | MUC12        | nonsynonymous SNV | MUC12:NM_001164462:exon2:c.C8078G:p.P2693R                          | NA                                   | NA          | NA |
| chr7 | 1.01E+08 | 1.01E+08 | G  | A  | exonic         | MUC12        | synonymous SNV    | MUC12:NM_001164462:exon2:c.G9999A:p.P3333P                          | NA                                   | rs199843676 | NA |
| chr7 | 1.01E+08 | 1.01E+08 | G  | A  | exonic         | COL26A1      | unknown           | UNKNOWN                                                             | NA                                   | rs17393069  | NA |
| chr7 | 1.03E+08 | 1.03E+08 | A  | G  | exonic         | RELN         | synonymous SNV    | RELN:NM_001173054:exon50:c.T7887C:p.P2629P,RELN:NM_173054:exon50:c. | NA                                   | rs56345626  | NA |
| chr7 | 1.08E+08 | 1.08E+08 | A  | G  | UTR5           | LAMB1        | NA                | NA                                                                  | NA                                   | rs2070917   | NA |
| chr7 | 1.18E+08 | 1.18E+08 | G  | C  | UTR5           | NAA38        | NA                | NA                                                                  | NA                                   | rs2896242   | NA |
| chr7 | 1.3E+08  | 1.3E+08  | -  | TG | UTR3           | CPA4         | NA                | NA                                                                  | NA                                   | NA          | NA |
| chr7 | 1.3E+08  | 1.3E+08  | A  | -  | UTR3           | COPG2        | NA                | NA                                                                  | NA                                   | rs61354155  | NA |
| chr7 | 1.35E+08 | 1.35E+08 | C  | T  | exonic         | WDR91        | synonymous SNV    | WDR91:NM_014149:exon14:c.G2028A:p.S676S                             | NA                                   | rs292557    | NA |
| chr7 | 1.38E+08 | 1.38E+08 | A  | T  | UTR3           | SVOP1        | NA                | NA                                                                  | NA                                   | rs1439793   | NA |
| chr7 | 1.42E+08 | 1.42E+08 | T  | C  | exonic         | PRSS2        | unknown           | UNKNOWN                                                             | NA                                   | NA          | NA |
| chr7 | 1.43E+08 | 1.43E+08 | C  | T  | exonic         | CLCN1        | synonymous SNV    | CLCN1:NM_000083:exon17:c.C2154T:p.D718D                             | NA                                   | rs2272251   | NA |
| chr7 | 1.43E+08 | 1.43E+08 | T  | C  | exonic         | EPHA1        | synonymous SNV    | EPHA1:NM_005232:exon17:c.A2742G:p.P914P                             | NA                                   | rs1804527   | NA |
| chr7 | 1.53E+08 | 1.53E+08 | C  | T  | exonic         | ACTR3B       | nonsynonymous SNV | ACTR3B:NM_020445:exon8:c.C748T:p.R250W,ACTR3B:NM_020445:exon        | NA                                   | rs140327402 | B  |
| chr7 | 1.55E+08 | 1.55E+08 | T  | G  | UTR3           | CNPY1        | NA                | NA                                                                  | NA                                   | rs112409058 | NA |
| chr7 | 1.55E+08 | 1.55E+08 | A  | G  | UTR5           | CNPY1        | NA                | NA                                                                  | NA                                   | rs6947243   | NA |
| chr8 | 1733482  | 1733482  | C  | G  | UTR3           | CLN8         | NA                | NA                                                                  | NA                                   | rs111861349 | NA |
| chr8 | 6793581  | 6793581  | A  | G  | exonic         | DEFA4        | synonymous SNV    | DEFA4:NM_001925:exon3:c.T255C:p.G85G                                | NA                                   | rs2738100   | NA |
| chr8 | 10466031 | 10466031 | A  | C  | exonic         | RP1L1        | nonsynonymous SNV | RP1L1:NM_178857:exon4:c.T5577G:p.D1859E                             | ID=COSM748980;OCCURENCE=1(lung)      | NA          | NA |
| chr8 | 12886083 | 12886083 | C  | T  | UTR3           | KIAA1456     | NA                | NA                                                                  | NA                                   | rs7464342   | NA |
| chr8 | 22069386 | 22069386 | T  | C  | UTR3           | BMP1         | NA                | NA                                                                  | NA                                   | rs7001      | NA |
| chr8 | 22546609 | 22546609 | G  | A  | UTR3           | EGR3         | NA                | NA                                                                  | NA                                   | NA          | NA |
| chr8 | 22900701 | 22900701 | G  | A  | exonic         | TNFRSF10B    | nonsynonymous SNV | TNFRSF10B:NM_147187:exon2:c.C200T:p.A67V,TNFRSF10B:NM_147187:exon   | NA                                   | rs1047266   | P  |
| chr8 | 23190941 | 23190941 | T  | C  | exonic         | LOXL2        | synonymous SNV    | LOXL2:NM_002318:exon5:c.A939G:p.S313S                               | NA                                   | rs1010156   | NA |
| chr8 | 23536563 | 23536563 | -  | T  | UTR3           | NKX3-1       | NA                | NA                                                                  | NA                                   | NA          | NA |
| chr8 | 33356074 | 33356074 | A  | G  | exonic         | MAK16        | nonsynonymous SNV | MAK16:NM_032509:exon10:c.A830G:p.Q277R                              | NA                                   | rs6468171   | B  |
| chr8 | 38033989 | 38033989 | G  | C  | UTR5           | LSM1         | NA                | NA                                                                  | NA                                   | rs2270376   | NA |
| chr8 | 39311600 | 39311600 | C  | T  | ncRNA_exonic   | ADAM3A       | NA                | NA                                                                  | NA                                   | rs7813010   | NA |
| chr8 | 40438757 | 40438757 | T  | C  | exonic         | ZMAT4        | nonsynonymous SNV | ZMAT4:NM_024645:exon5:c.A373G:p.T125A,ZMAT4:NM_024645:exon          | ID=COSM1179839;OCCURENCE=1(prostate) | rs17851751  | B  |
| chr8 | 52730987 | 52730987 | C  | A  | UTR3           | PCMTD1       | NA                | NA                                                                  | NA                                   | rs201437100 | NA |
| chr8 | 75946695 | 75946695 | T  | G  | UTR3           | CRISPLD1     | NA                | NA                                                                  | NA                                   | rs13248650  | NA |
| chr8 | 76476959 | 76476959 | C  | A  | UTR3           | HNF4G        | NA                | NA                                                                  | NA                                   | rs2941479   | NA |
| chr8 | 76478991 | 76478991 | G  | A  | UTR3           | HNF4G        | NA                | NA                                                                  | NA                                   | rs11774375  | NA |
| chr8 | 82712242 | 82712242 | -  | AA | UTR3           | SNX16        | NA                | NA                                                                  | NA                                   | NA          | NA |
| chr8 | 87666251 | 87666251 | T  | G  | exonic         | CNGB3        | nonsynonymous SNV | CNGB3:NM_019098:exon7:c.A892C:p.T298P                               | NA                                   | rs4961206   | B  |
| chr8 | 90914272 | 90914272 | A  | G  | UTR5           | OSGIN2       | NA                | NA                                                                  | NA                                   | rs2250670   | NA |
| chr8 | 1.04E+08 | 1.04E+08 | G  | A  | exonic         | ODF1         | nonsynonymous SNV | ODF1:NM_024410:exon2:c.G647A:p.S216N                                | NA                                   | rs2916569   | NA |
| chr8 | 1.21E+08 | 1.21E+08 | C  | G  | exonic         | TAF2         | nonsynonymous SNV | TAF2:NM_003184:exon11:c.G1340C:p.S447T                              | ID=COSM150523;OCCURENCE=1(stomach)   | rs9297605   | B  |
| chr8 | 1.23E+08 | 1.23E+08 | T  | A  | ncRNA_UTR5     | HAS2         | NA                | NA                                                                  | NA                                   | rs3853253   | NA |
| chr8 | 1.31E+08 | 1.31E+08 | A  | G  | exonic         | FAM49B       | synonymous SNV    | FAM49B:NM_001256763:exon8:c.T585C:p.T195T,FAM49B:NM_001256763:exon  | NA                                   | rs1051893   | NA |
| chr8 | 1.34E+08 | 1.34E+08 | G  | A  | exonic         | TG           | nonsynonymous SNV | TG:NM_003235:exon44:c.G7589A:p.R2530Q                               | NA                                   | rs1133076   | B  |
| chr8 | 1.34E+08 | 1.34E+08 | T  | -  | UTR3           | ST3GAL1      | NA                | NA                                                                  | NA                                   | rs61689158  | NA |
| chr8 | 1.42E+08 | 1.42E+08 | A  | G  | exonic         | SLC45A4      | synonymous SNV    | SLC45A4:NM_001080431:exon7:c.T2070C:p.G690G                         | NA                                   | rs7017848   | NA |
| chr8 | 1.42E+08 | 1.42E+08 | T  | C  | ncRNA_exonic   | LOC731779    | NA                | NA                                                                  | NA                                   | rs6987289   | NA |
| chr8 | 1.45E+08 | 1.45E+08 | CT | -  | UTR3           | FAM83H       | NA                | NA                                                                  | NA                                   | rs34283115  | NA |
| chr8 | 1.45E+08 | 1.45E+08 | G  | T  | UTR3           | GRINA        | NA                | NA                                                                  | NA                                   | rs9100      | NA |
| chr9 | 2029199  | 2029199  | G  | A  | exonic         | SMARCA2      | synonymous SNV    | SMARCA2:NM_139045:exon2:c.G177A:p.T59T,SMARCA2:NM_139045:exon       | NA                                   | rs10964471  | NA |



|       |          |          |   |          |              |                  |                         |                                                    |                                    |             |    |
|-------|----------|----------|---|----------|--------------|------------------|-------------------------|----------------------------------------------------|------------------------------------|-------------|----|
| chr9  | 4622453  | 4622453  | T | C        | exonic       | SPATA6L          | nonsynonymous SNV       | SPATA6L:NM_001039395:exon6:c.A553G:p.R185G         | NA                                 | rs10974657  | P  |
| chr9  | 12775861 | 12775861 | - | GCGGGCGG | exonic       | LURAP1L          | nonframeshift insertion | :NM_203403:exon1:c.147_148insGGCGGGCGG:p.G49deli   | NA                                 | rs139315731 | NA |
| chr9  | 14993419 | 14993419 | G | T        | ncRNA_exonic | LOC389705        | NA                      | NA                                                 | NA                                 | rs4548277   | NA |
| chr9  | 17273731 | 17273731 | A | G        | exonic       | CNTLN            | nonsynonymous SNV       | .4395:exon6:c.A850G:p.T284A,CNTLN:NM_017738:exon6  | NA                                 | rs3808795   | B  |
| chr9  | 19060197 | 19060197 | A | T        | exonic       | HAUS6            | nonsynonymous SNV       | 890:exon15:c.T1549A:p.S517T,HAUS6:NM_017645:exon1  | NA                                 | rs41269003  | D  |
| chr9  | 20346377 | 20346377 | - | A        | UTR3         | MLLT3            | NA                      | NA                                                 | NA                                 | NA          | NA |
| chr9  | 27062666 | 27062666 | G | A        | exonic       | IFT74            | nonsynonymous SNV       | 79M,IFT74:NM_001099223:exon20:c.G1735A:p.V579M,I   | NA                                 | rs138591335 | P  |
| chr9  | 27205021 | 27205021 | G | A        | exonic       | TEK              | synonymous SNV          | TEK:NM_000459:exon14:c.G2322A:p.R774R              | NA                                 | rs542913    | NA |
| chr9  | 33111199 | 33111199 | C | T        | UTR3         | B4GALT1          | NA                      | NA                                                 | NA                                 | rs74995636  | NA |
| chr9  | 33386465 | 33386465 | A | G        | exonic       | AQP7             | nonsynonymous SNV       | AQP7:NM_001170:exon5:c.T343C:p.Y115H               | NA                                 | rs74668961  | B  |
| chr9  | 38398153 | 38398153 | A | T        | UTR3         | ALDH1B1          | NA                      | NA                                                 | NA                                 | rs74363930  | NA |
| chr9  | 41952522 | 41952522 | T | A        | ncRNA_exonic | MGC21881         | NA                      | NA                                                 | NA                                 | rs62539305  | NA |
| chr9  | 41953020 | 41953020 | T | C        | ncRNA_exonic | MGC21881         | NA                      | NA                                                 | NA                                 | rs201318708 | NA |
| chr9  | 41960898 | 41960898 | G | T        | ncRNA_exonic | KGFLP2           | NA                      | NA                                                 | NA                                 | rs201761160 | NA |
| chr9  | 66501326 | 66501326 | T | C        | ncRNA_exonic | TGER4P2-CDK2AP2F | NA                      | NA                                                 | NA                                 | rs28692535  | NA |
| chr9  | 66501329 | 66501329 | C | G        | ncRNA_exonic | TGER4P2-CDK2AP2F | NA                      | NA                                                 | NA                                 | rs201855807 | NA |
| chr9  | 67281729 | 67281729 | G | A        | ncRNA_exonic | AQP7P1           | NA                      | NA                                                 | NA                                 | rs9696090   | NA |
| chr9  | 69663721 | 69663721 | C | G        | ncRNA_exonic | LOC100133920     | NA                      | NA                                                 | NA                                 | rs199847383 | NA |
| chr9  | 69664842 | 69664842 | T | A        | ncRNA_exonic | LOC100133920     | NA                      | NA                                                 | NA                                 | rs75601058  | NA |
| chr9  | 70175764 | 70175764 | A | G        | UTR3         | FOXD4L5          | NA                      | NA                                                 | NA                                 | rs201445301 | NA |
| chr9  | 70175856 | 70175856 | C | T        | UTR3         | FOXD4L5          | NA                      | NA                                                 | NA                                 | rs187159666 | NA |
| chr9  | 77407636 | 77407636 | C | T        | exonic       | TRPM6            | synonymous SNV          | 09Q,TRPM6:NM_001177311:exon19:c.G2427A:p.Q809Q,    | NA                                 | rs4145894   | NA |
| chr9  | 87285595 | 87285595 | C | G        | UTR5         | NTRK2            | NA                      | NA                                                 | NA                                 | rs1187325   | NA |
| chr9  | 88959938 | 88959938 | C | T        | exonic       | ZCCHC6           | synonymous SNV          | L317L,ZCCHC6:NM_001185074:exon5:c.G951A:p.L317L,Z  | NA                                 | rs791323    | NA |
| chr9  | 89763574 | 89763574 | A | C        | UTR5         | C9orf170         | NA                      | NA                                                 | NA                                 | rs461126    | NA |
| chr9  | 94985637 | 94985637 | T | C        | exonic       | IARS             | nonsynonymous SNV       | :exon32:c.A3544G:p.K1182E,IARS:NM_013417:exon32:c. | NA                                 | rs556155    | B  |
| chr9  | 1E+08    | 1E+08    | T | C        | exonic       | TDRD7            | nonsynonymous SNV       | TDRD7:NM_014290:exon4:c.T449C:p.V150A              | ID=COSM150645;OCCURENCE=1(stomach) | rs2045732   | B  |
| chr9  | 1.02E+08 | 1.02E+08 | A | C        | UTR5         | SEC61B           | NA                      | NA                                                 | NA                                 | NA          | NA |
| chr9  | 1.13E+08 | 1.13E+08 | C | T        | UTR3         | PALM2            | NA                      | NA                                                 | NA                                 | rs10816907  | NA |
| chr9  | 1.16E+08 | 1.16E+08 | C | A        | UTR5         | ZNF883           | NA                      | NA                                                 | NA                                 | rs1324934   | NA |
| chr9  | 1.17E+08 | 1.17E+08 | A | G        | exonic       | AKNA             | nonsynonymous SNV       | AKNA:NM_030767:exon21:c.T3907C:p.S1303P            | NA                                 | rs2250242   | B  |
| chr9  | 1.17E+08 | 1.17E+08 | A | G        | exonic       | DFNB31           | synonymous SNV          | 8G,DFNB31:NM_001173425:exon6:c.T1353C:p.G451G,DI   | NA                                 | rs4979387   | NA |
| chr9  | 1.23E+08 | 1.23E+08 | C | G        | exonic       | CDK5RAP2         | nonsynonymous SNV       | 0L,CDK5RAP2:NM_001011649:exon31:c.G4618C:p.V1540   | NA                                 | rs4837768   | B  |
| chr9  | 1.27E+08 | 1.27E+08 | G | A        | exonic       | GPR144           | nonsynonymous SNV       | GPR144:NM_001161808:exon10:c.G1694A:p.S565N        | NA                                 | NA          | NA |
| chr9  | 1.32E+08 | 1.32E+08 | T | C        | exonic       | TBC1D13          | nonsynonymous SNV       | TBC1D13:NM_018201:exon8:c.T569C:p.V190A            | NA                                 | rs1572912   | B  |
| chr9  | 1.33E+08 | 1.33E+08 | T | G        | UTR3         | TOR1B            | NA                      | NA                                                 | NA                                 | rs1220509   | NA |
| chr9  | 1.35E+08 | 1.35E+08 | G | T        | UTR3         | SETX             | NA                      | NA                                                 | NA                                 | rs11787894  | NA |
| chr9  | 1.36E+08 | 1.36E+08 | C | T        | exonic       | RALGDS           | synonymous SNV          | 08V,RALGDS:NM_001271775:exon3:c.G372A:p.V124V,R    | NA                                 | rs3761824   | NA |
| chr9  | 1.36E+08 | 1.36E+08 | C | T        | exonic       | ADAMTSL2         | synonymous SNV          | 320:exon17:c.C2436T:p.R812R,ADAMTSL2:NM_014694:e   | NA                                 | rs147931149 | NA |
| chr9  | 1.38E+08 | 1.38E+08 | - | C        | UTR3         | OBP2A            | NA                      | NA                                                 | NA                                 | rs112851559 | NA |
| chr10 | 1205801  | 1205801  | C | A        | ncRNA_exonic | LINC00200        | NA                      | NA                                                 | NA                                 | rs12763661  | NA |
| chr10 | 1228330  | 1228330  | G | T        | UTR3         | ADARB2           | NA                      | NA                                                 | NA                                 | rs1129226   | NA |
| chr10 | 3172145  | 3172145  | C | T        | exonic       | PFKP             | synonymous SNV          | :exon17:c.C1818T:p.F606F,PFKP:NM_001242339:exon19: | NA                                 | rs1052337   | NA |
| chr10 | 3208566  | 3208566  | C | T        | exonic       | PITRM1           | synonymous SNV          | Q59Q,PITRM1:NM_001242307:exon4:c.G273A:p.Q91Q,PI   | NA                                 | rs114690446 | NA |
| chr10 | 3208567  | 3208567  | T | G        | exonic       | PITRM1           | nonsynonymous SNV       | .Q59P,PITRM1:NM_001242307:exon4:c.A272C:p.Q91P,PI  | NA                                 | rs28416720  | NA |
| chr10 | 7285632  | 7285632  | A | G        | exonic       | SFMBT2           | synonymous SNV          | 39:exon9:c.T1008C:p.D336D,SFMBT2:NM_001029880:ex   | NA                                 | rs2248474   | NA |
| chr10 | 7780655  | 7780655  | G | A        | exonic       | ITIH2            | nonsynonymous SNV       | ITIH2:NM_002216:exon16:c.G2029A:p.V677M            | NA                                 | rs188916946 | B  |
| chr10 | 16547058 | 16547058 | A | G        | exonic       | PTER             | synonymous SNV          | .836:exon4:c.A738G:p.Q246Q,PTER:NM_001001484:exon  | NA                                 | rs7904014   | NA |
| chr10 | 17088006 | 17088006 | T | C        | exonic       | CUBN             | synonymous SNV          | CUBN:NM_001081:exon24:c.A3417G:p.L1139L            | NA                                 | rs1801228   | NA |
| chr10 | 17130199 | 17130199 | G | A        | exonic       | CUBN             | synonymous SNV          | CUBN:NM_001081:exon15:c.C1911T:p.L637L             | NA                                 | rs41289311  | NA |
| chr10 | 18242311 | 18242311 | A | G        | exonic       | SLC39A12         | nonsynonymous SNV       | .45195:exon2:c.A106G:p.S36G,SLC39A12:NM_152725:exc | NA                                 | rs10764176  | B  |
| chr10 | 21807780 | 21807780 | T | -        | UTR5         | SKIDA1           | NA                      | NA                                                 | NA                                 | rs112940679 | NA |
| chr10 | 27224492 | 27224492 | G | C        | ncRNA_exonic | LINC00202-1      | NA                      | NA                                                 | NA                                 | rs11015390  | NA |
| chr10 | 32580205 | 32580205 | C | T        | exonic       | EPC1             | nonsynonymous SNV       | M287I,EPC1:NM_001272019:exon6:c.G648A:p.M216I,EP   | NA                                 | rs72789797  | P  |
| chr10 | 33165422 | 33165422 | G | A        | UTR3         | C10orf68         | NA                      | NA                                                 | NA                                 | rs12217414  | NA |
| chr10 | 33214802 | 33214802 | A | G        | exonic       | ITGB1            | synonymous SNV          | C261C,ITGB1:NM_002211:exon6:c.T783C:p.C261C,ITGB1: | NA                                 | rs2298141   | NA |
| chr10 | 45649320 | 45649320 | A | G        | ncRNA_exonic | RSU1P2           | NA                      | NA                                                 | NA                                 | rs7478624   | NA |
| chr10 | 50029121 | 50029121 | C | T        | exonic       | WDFY4            | synonymous SNV          | WDFY4:NM_020945:exon34:c.C5724T:p.H1908H           | NA                                 | rs79406124  | NA |
| chr10 | 65225899 | 65225899 | - | GGCGGC   | ncRNA_exonic | JMJD1C-AS1       | NA                      | NA                                                 | NA                                 | rs3841602   | NA |
| chr10 | 71899708 | 71899708 | A | G        | exonic       | TYSND1           | nonsynonymous SNV       | TYSND1:NM_173555:exon4:c.T1673C:p.L558P            | NA                                 | NA          | B  |
| chr10 | 72536921 | 72536921 | A | G        | exonic       | TBATA            | synonymous SNV          | TBATA:NM_152710:exon7:c.T678C:p.D226D              | NA                                 | rs151019808 | NA |
| chr10 | 73767481 | 73767481 | A | C        | exonic       | CHST3            | nonsynonymous SNV       | CHST3:NM_004273:exon3:c.A692C:p.D231A              | NA                                 | NA          | B  |

|       |          |          |           |    |              |              |                        |                                                    |                                      |             |    |
|-------|----------|----------|-----------|----|--------------|--------------|------------------------|----------------------------------------------------|--------------------------------------|-------------|----|
| chr10 | 81114813 | 81114813 | C         | G  | UTR3         | PPIF         | NA                     | NA                                                 | NA                                   | rs8837      | NA |
| chr10 | 82126808 | 82126808 | C         | G  | UTR3         | DYDC2        | NA                     | NA                                                 | NA                                   | rs1047952   | NA |
| chr10 | 86018493 | 86018493 | -         | A  | UTR3         | RGR          | NA                     | NA                                                 | NA                                   | rs34014972  | NA |
| chr10 | 89127510 | 89127523 | GGACTGGC  | -  | ncRNA_exonic | NUTM2D       | NA                     | NA                                                 | NA                                   | NA          | NA |
| chr10 | 90585819 | 90585819 | G         | A  | exonic       | ANKRD22      | synonymous SNV         | ANKRD22:NM_144590:exon4:c.C375T:p.G125G            | NA                                   | rs7893917   | NA |
| chr10 | 1.02E+08 | 1.02E+08 | C         | T  | exonic       | PKD2L1       | nonsynonymous SNV      | 3837:exon6:c.G1036A:p.V346I,PKD2L1:NM_016112:exon1 | NA                                   | rs2278842   | P  |
| chr10 | 1.04E+08 | 1.04E+08 | C         | A  | UTR3         | TMEM180      | NA                     | NA                                                 | NA                                   | rs10883724  | NA |
| chr10 | 1.05E+08 | 1.05E+08 | T         | C  | UTR3         | CALHM1       | NA                     | NA                                                 | NA                                   | rs192524959 | NA |
| chr10 | 1.14E+08 | 1.14E+08 | A         | G  | ncRNA_exonic | GUCY2GP      | NA                     | NA                                                 | NA                                   | rs1887136   | NA |
| chr10 | 1.16E+08 | 1.16E+08 | C         | G  | UTR5         | ABLIM1       | NA                     | NA                                                 | NA                                   | rs141394498 | NA |
| chr10 | 1.17E+08 | 1.17E+08 | T         | C  | exonic       | FAM160B1     | synonymous SNV         | 051:exon14:c.T1893C:p.F631F,FAM160B1:NM_020940:e   | NA                                   | rs3180654   | NA |
| chr10 | 1.18E+08 | 1.18E+08 | -         | TT | UTR3         | GFRA1        | NA                     | NA                                                 | NA                                   | NA          | NA |
| chr10 | 1.18E+08 | 1.18E+08 | -         | G  | exonic       | PNLIPRP2     | unknown                | UNKNOWN                                            | NA                                   | NA          | NA |
| chr10 | 1.18E+08 | 1.18E+08 | A         | G  | UTR3         | HSPA12A      | NA                     | NA                                                 | NA                                   | rs7084566   | NA |
| chr10 | 1.19E+08 | 1.19E+08 | T         | C  | ncRNA_exonic | EMX2OS       | NA                     | NA                                                 | NA                                   | rs2768325   | NA |
| chr10 | 1.19E+08 | 1.19E+08 | C         | G  | ncRNA_exonic | EMX2OS       | NA                     | NA                                                 | NA                                   | rs2768330   | NA |
| chr10 | 1.2E+08  | 1.2E+08  | G         | -  | UTR5         | RAB11FIP2    | NA                     | NA                                                 | NA                                   | rs67350544  | NA |
| chr10 | 1.25E+08 | 1.25E+08 | G         | A  | UTR3         | ACADSB       | NA                     | NA                                                 | NA                                   | rs1140593   | NA |
| chr10 | 1.27E+08 | 1.27E+08 | G         | C  | exonic       | CTBP2        | nonsynonymous SNV      | CTBP2:NM_022802:exon1:c.C1615G:p.Q539E             | NA                                   | rs2946994   | P  |
| chr10 | 1.27E+08 | 1.27E+08 | A         | G  | exonic       | CTBP2        | nonsynonymous SNV      | CTBP2:NM_022802:exon1:c.T1363C:p.Y455H             | NA                                   | rs3012075   | D  |
| chr10 | 1.34E+08 | 1.34E+08 | C         | T  | UTR3         | LRRC27       | NA                     | NA                                                 | NA                                   | rs72863837  | NA |
| chr10 | 1.34E+08 | 1.34E+08 | A         | G  | UTR3         | LRRC27       | NA                     | NA                                                 | NA                                   | rs72863838  | NA |
| chr10 | 1.35E+08 | 1.35E+08 | T         | C  | exonic       | SYCE1        | nonsynonymous SNV      | SYCE1:NM_001143764:exon13:c.A962G:p.H321R          | ID=COSM147095;OCCURENCE=1(stomach)   | rs3737031   | NA |
| chr10 | 1.35E+08 | 1.35E+08 | A         | T  | exonic       | FRG2B        | nonsynonymous SNV      | FRG2B:NM_001080998:exon1:c.T44A:p.I15N             | NA                                   | rs200661929 | NA |
| chr11 | 128625   | 128625   | A         | G  | ncRNA_exonic | LOC100133161 | NA                     | NA                                                 | NA                                   | NA          | NA |
| chr11 | 237087   | 237087   | A         | G  | exonic       | PSMD13       | nonsynonymous SNV      | 02817:exon1:c.A38G:p.N13S,PSMD13:NM_175932:exon1   | NA                                   | rs1045288   | B  |
| chr11 | 284257   | 284257   | G         | A  | exonic       | NLRP6        | synonymous SNV         | 7700:exon6:c.G2226A:p.A742A,NLRP6:NM_138329:exon6  | NA                                   | rs11246050  | NA |
| chr11 | 611919   | 611919   | C         | G  | UTR3         | PHRF1        | NA                     | NA                                                 | NA                                   | rs702966    | NA |
| chr11 | 1016609  | 1016609  | C         | G  | exonic       | MUC6         | nonsynonymous SNV      | MUC6:NM_005961:exon31:c.G6192C:p.M2064I            | NA                                   | rs73403291  | NA |
| chr11 | 1017317  | 1017317  | G         | T  | exonic       | MUC6         | synonymous SNV         | MUC6:NM_005961:exon31:c.C5484A:p.T1828T            | NA                                   | rs33943903  | NA |
| chr11 | 1017337  | 1017337  | T         | C  | exonic       | MUC6         | nonsynonymous SNV      | MUC6:NM_005961:exon31:c.A5464G:p.T1822A            | NA                                   | rs76686156  | NA |
| chr11 | 1017338  | 1017338  | C         | A  | exonic       | MUC6         | nonsynonymous SNV      | MUC6:NM_005961:exon31:c.G5463T:p.Q1821H            | NA                                   | rs78943453  | NA |
| chr11 | 1018168  | 1018170  | TCG       | -  | exonic       | MUC6         | nonframeshift deletion | IUC6:NM_005961:exon31:c.4631_4633del:p.1544_1545d  | NA                                   | rs111749447 | NA |
| chr11 | 1018300  | 1018300  | G         | T  | exonic       | MUC6         | nonsynonymous SNV      | MUC6:NM_005961:exon31:c.C4501A:p.P1501T            | NA                                   | rs113744996 | NA |
| chr11 | 1018304  | 1018304  | G         | C  | exonic       | MUC6         | synonymous SNV         | MUC6:NM_005961:exon31:c.C4497G:p.A1499A            | NA                                   | rs113835477 | NA |
| chr11 | 1081757  | 1081757  | G         | C  | exonic       | MUC2         | nonsynonymous SNV      | MUC2:NM_002457:exon13:c.G1685C:p.S562T             | NA                                   | rs57737240  | NA |
| chr11 | 2672432  | 2672432  | -         | A  | ncRNA_exonic | KCNQ1OT1     | NA                     | NA                                                 | NA                                   | rs34514246  | NA |
| chr11 | 2699252  | 2699252  | -         | T  | ncRNA_exonic | KCNQ1OT1     | NA                     | NA                                                 | NA                                   | NA          | NA |
| chr11 | 2924850  | 2924850  | -         | C  | UTR5         | SLC22A18AS   | NA                     | NA                                                 | NA                                   | NA          | NA |
| chr11 | 6411935  | 6411935  | T         | C  | exonic       | SMPD1        | nonsynonymous SNV      | 543:exon1:c.T107C:p.V36A,SMPD1:NM_001007593:exon1  | NA                                   | rs1050228   | NA |
| chr11 | 11985134 | 11985139 | TTTACT    | -  | UTR3         | DKK3         | NA                     | NA                                                 | NA                                   | rs142843448 | NA |
| chr11 | 12316389 | 12316389 | A         | C  | exonic       | MICALCL      | nonsynonymous SNV      | MICALCL:NM_032867:exon3:c.A1411C:p.T471P           | NA                                   | rs3812754   | B  |
| chr11 | 17519742 | 17519742 | C         | G  | exonic       | USH1C        | nonsynonymous SNV      | 9:exon19:c.G1557C:p.E519D,USH1C:NM_153676:exon24:  | NA                                   | rs1064074   | P  |
| chr11 | 26690702 | 26690702 | C         | T  | UTR3         | SLC5A12      | NA                     | NA                                                 | NA                                   | rs76831336  | NA |
| chr11 | 34642668 | 34642668 | A         | G  | UTR5         | EHF          | NA                     | NA                                                 | NA                                   | rs286925    | NA |
| chr11 | 34642728 | 34642728 | A         | T  | UTR5         | EHF          | NA                     | NA                                                 | NA                                   | rs286924    | NA |
| chr11 | 35201842 | 35201842 | C         | T  | exonic       | CD44         | synonymous SNV         | 35H,CD44:NM_001001391:exon3:c.C255T:p.H85H,CD44:N  | NA                                   | rs1071695   | NA |
| chr11 | 43940644 | 43940644 | G         | T  | exonic       | ALKBH3       | synonymous SNV         | ALKBH3:NM_139178:exon9:c.G726T:p.G242G             | NA                                   | rs1048928   | NA |
| chr11 | 46342943 | 46342943 | A         | -  | UTR3         | CREB3L1      | NA                     | NA                                                 | NA                                   | NA          | NA |
| chr11 | 48346661 | 48346669 | TTGCTGATC | -  | exonic       | OR4C3        | nonframeshift deletion | OR4C3:NM_001004702:exon1:c.169_177del:p.57_59del   | ID=COSM1163639;OCCURENCE=2(pancreas) | rs138704181 | NA |
| chr11 | 62294717 | 62294717 | A         | T  | exonic       | AHNAK        | nonsynonymous SNV      | AHNAK:NM_001620:exon5:c.T7172A:p.L2391H            | NA                                   | NA          | P  |
| chr11 | 62378801 | 62378801 | T         | C  | exonic       | EML3         | synonymous SNV         | EML3:NM_153265:exon3:c.A210G:p.P70P                | NA                                   | rs11553576  | NA |
| chr11 | 62434173 | 62434173 | G         | A  | exonic       | METTL12      | nonsynonymous SNV      | METTL12:NM_001043229:exon3:c.G373A:p.G125S         | NA                                   | rs11231181  | B  |
| chr11 | 64138805 | 64138805 | T         | C  | exonic       | RPS6KA4      | synonymous SNV         | 144:exon17:c.T2154C:p.N718N,RPS6KA4:NM_003942:exo  | NA                                   | rs11542299  | NA |
| chr11 | 64807447 | 64807447 | A         | C  | ncRNA_exonic | ARL2-SNX15   | NA                     | NA                                                 | NA                                   | rs664118    | NA |
| chr11 | 67415054 | 67415054 | C         | T  | UTR5         | ACY3         | NA                     | NA                                                 | NA                                   | rs2514036   | NA |
| chr11 | 71708250 | 71708253 | GTGT      | -  | UTR3         | RNF121       | NA                     | NA                                                 | NA                                   | NA          | NA |
| chr11 | 72385393 | 72385393 | A         | C  | UTR5         | PDE2A        | NA                     | NA                                                 | NA                                   | NA          | NA |
| chr11 | 73670645 | 73670645 | T         | C  | exonic       | DNAJB13      | synonymous SNV         | DNAJB13:NM_153614:exon3:c.T279C:p.H93H             | NA                                   | rs653263    | NA |
| chr11 | 89059054 | 89059055 | TA        | -  | UTR3         | NOX4         | NA                     | NA                                                 | NA                                   | NA          | NA |
| chr11 | 94150790 | 94150790 | T         | C  | UTR3         | MRE11A       | NA                     | NA                                                 | NA                                   | rs2155209   | NA |
| chr11 | 1.06E+08 | 1.06E+08 | -         | A  | UTR3         | GRIA4        | NA                     | NA                                                 | NA                                   | NA          | NA |

|       |          |          |           |      |              |                   |                        |                                                    |                                    |             |    |
|-------|----------|----------|-----------|------|--------------|-------------------|------------------------|----------------------------------------------------|------------------------------------|-------------|----|
| chr11 | 1.08E+08 | 1.08E+08 | A         | G    | UTR3         | SLC35F2           | NA                     | NA                                                 | NA                                 | rs4754259   | NA |
| chr11 | 1.1E+08  | 1.1E+08  | AA        | -    | UTR3         | ARHGAP20          | NA                     | NA                                                 | NA                                 | rs200762479 | NA |
| chr11 | 1.11E+08 | 1.11E+08 | -         | AGGA | UTR3         | POU2AF1           | NA                     | NA                                                 | NA                                 | NA          | NA |
| chr11 | 1.12E+08 | 1.12E+08 | G         | -    | splicing     | .61-1C>-,NM_00107 | NA                     | NA                                                 | NA                                 | rs10708475  | NA |
| chr11 | 1.13E+08 | 1.13E+08 | -         | G    | UTR5         | NCAM1             | NA                     | NA                                                 | NA                                 | rs145493999 | NA |
| chr11 | 1.17E+08 | 1.17E+08 | G         | A    | exonic       | PCSK7             | synonymous SNV         | PCSK7:NM_004716:exon17:c.C2196T:p.D732D            | NA                                 | rs139944026 | NA |
| chr11 | 1.17E+08 | 1.17E+08 | C         | G    | exonic       | BACE1             | synonymous SNV         | 012104:exon5:c.G786C:p.V262V,BACE1:NM_138971:exor  | NA                                 | rs638405    | NA |
| chr11 | 1.17E+08 | 1.17E+08 | G         | T    | exonic       | DSCAML1           | nonsynonymous SNV      | DSCAML1:NM_020693:exon4:c.C694A;p.H232N            | ID=COSM147330;OCCURENCE=1(stomach) | rs3741280   | NA |
| chr11 | 1.18E+08 | 1.18E+08 | CACA      | -    | UTR3         | FXYD6             | NA                     | NA                                                 | NA                                 | NA          | NA |
| chr11 | 1.19E+08 | 1.19E+08 | G         | C    | UTR3         | DDX6              | NA                     | NA                                                 | NA                                 | rs487728    | NA |
| chr11 | 1.19E+08 | 1.19E+08 | -         | T    | UTR3         | DDX6              | NA                     | NA                                                 | NA                                 | rs139078958 | NA |
| chr11 | 1.25E+08 | 1.25E+08 | -         | T    | UTR3         | MSANTD2           | NA                     | NA                                                 | NA                                 | rs137996267 | NA |
| chr11 | 1.25E+08 | 1.25E+08 | G         | A    | exonic       | ROBO4             | synonymous SNV         | ROBO4:NM_019055:exon2:c.C103T:p.L35L               | NA                                 | rs73016370  | NA |
| chr11 | 1.25E+08 | 1.25E+08 | G         | A    | UTR3         | SLC37A2           | NA                     | NA                                                 | NA                                 | NA          | NA |
| chr11 | 1.25E+08 | 1.25E+08 | C         | T    | exonic       | STT3A             | synonymous SNV         | STT3A:NM_152713:exon16:c.C1911T:p.C637C            | NA                                 | rs17140116  | NA |
| chr11 | 1.25E+08 | 1.25E+08 | C         | T    | UTR5         | CHEK1             | NA                     | NA                                                 | NA                                 | rs558351    | NA |
| chr11 | 1.26E+08 | 1.26E+08 | C         | T    | exonic       | DCPS              | synonymous SNV         | DCPS:NM_014026:exon1:c.C63T:p.H21H                 | NA                                 | rs3740915   | NA |
| chr11 | 1.3E+08  | 1.3E+08  | -         | T    | UTR3         | ZBTB44            | NA                     | NA                                                 | NA                                 | NA          | NA |
| chr11 | 1.3E+08  | 1.3E+08  | G         | A    | UTR3         | ZBTB44            | NA                     | NA                                                 | NA                                 | rs184424056 | NA |
| chr11 | 1.3E+08  | 1.3E+08  | A         | G    | UTR3         | ZBTB44            | NA                     | NA                                                 | NA                                 | rs2297070   | NA |
| chr11 | 1.34E+08 | 1.34E+08 | G         | A    | intronic     | IGSF9B            | NA                     | NA                                                 | NA                                 | rs329677    | NA |
| chr11 | 1.34E+08 | 1.34E+08 | G         | A    | UTR3         | JAM3              | NA                     | NA                                                 | NA                                 | rs597320    | NA |
| chr12 | 1022452  | 1022452  | C         | T    | UTR3         | RAD52             | NA                     | NA                                                 | NA                                 | rs1051669   | NA |
| chr12 | 4414167  | 4414167  | T         | -    | UTR3         | CCND2             | NA                     | NA                                                 | NA                                 | rs61152953  | NA |
| chr12 | 4919197  | 4919197  | T         | C    | UTR5         | KCNA6             | NA                     | NA                                                 | NA                                 | NA          | NA |
| chr12 | 4919248  | 4919248  | A         | G    | exonic       | KCNA6             | nonsynonymous SNV      | KCNA6:NM_002235:exon1:c.A41G:p.E14G                | NA                                 | NA          | P  |
| chr12 | 7649484  | 7649484  | T         | C    | exonic       | CD163             | nonsynonymous SNV      | !44:exon5:c.A1024G:p.I342V,CD163:NM_203416:exon5:c | NA                                 | rs4883263   | NA |
| chr12 | 7945559  | 7945559  | T         | C    | exonic       | NANOG             | synonymous SNV         | NANOG:NM_024865:exon2:c.T165C:p.P55P               | NA                                 | rs4294629   | NA |
| chr12 | 7945640  | 7945640  | G         | T    | exonic       | NANOG             | nonsynonymous SNV      | NANOG:NM_024865:exon2:c.G246T:p.K82N               | NA                                 | rs2889551   | B  |
| chr12 | 7945670  | 7945670  | G         | A    | exonic       | NANOG             | synonymous SNV         | NANOG:NM_024865:exon2:c.G276A:p.P92P               | NA                                 | rs4354764   | NA |
| chr12 | 7945757  | 7945757  | C         | T    | exonic       | NANOG             | synonymous SNV         | NANOG:NM_024865:exon2:c.C363T:p.S121S              | NA                                 | rs4438116   | NA |
| chr12 | 7948584  | 7948584  | C         | A    | UTR3         | NANOG             | NA                     | NA                                                 | NA                                 | rs35212015  | NA |
| chr12 | 8353486  | 8353486  | C         | G    | ncRNA_exonic | FAM66C            | NA                     | NA                                                 | NA                                 | rs200786680 | NA |
| chr12 | 10468648 | 10468648 | T         | C    | UTR3         | KLRD1             | NA                     | NA                                                 | NA                                 | rs7966660   | NA |
| chr12 | 10560957 | 10560957 | T         | C    | exonic       | KLRC4             | nonsynonymous SNV      | KLRC4:NM_013431:exon3:c.A311G:p.N104S              | NA                                 | rs2617170   | NA |
| chr12 | 11420471 | 11420471 | C         | G    | exonic       | PRB3              | nonsynonymous SNV      | PRB3:NM_006249:exon3:c.G712C:p.G238R               | NA                                 | NA          | NA |
| chr12 | 12046813 | 12046813 | A         | G    | ncRNA_UTR3   | ETV6              | NA                     | NA                                                 | NA                                 | rs2710275   | NA |
| chr12 | 12943043 | 12943045 | TTC       | -    | UTR3         | APOLD1            | NA                     | NA                                                 | NA                                 | rs146851735 | NA |
| chr12 | 18435399 | 18435401 | CCC       | -    | exonic       | PIK3C2G           | nonframeshift deletion | PIK3C2G:NM_004570:exon2:c.384_386del:p.128_129del  | NA                                 | rs55845540  | NA |
| chr12 | 21329738 | 21329738 | A         | G    | exonic       | SLCO1B1           | nonsynonymous SNV      | SLCO1B1:NM_006446:exon5:c.A388G:p.N130D            | NA                                 | rs2306283   | B  |
| chr12 | 25146594 | 25146594 | A         | T    | UTR3         | C12orf77          | NA                     | NA                                                 | NA                                 | rs28561442  | NA |
| chr12 | 45307633 | 45307633 | T         | C    | UTR5         | NELL2             | NA                     | NA                                                 | NA                                 | rs374144    | NA |
| chr12 | 49298059 | 49298059 | G         | A    | UTR5         | CCDC65            | NA                     | NA                                                 | NA                                 | rs3809147   | NA |
| chr12 | 49726255 | 49726255 | -         | G    | UTR3         | C1QL4             | NA                     | NA                                                 | NA                                 | rs112341833 | NA |
| chr12 | 50747134 | 50747134 | T         | G    | exonic       | FAM186A           | nonsynonymous SNV      | FAM186A:NM_001145475:exon4:c.A3481C:p.T1161P       | NA                                 | NA          | NA |
| chr12 | 51723499 | 51723499 | T         | C    | exonic       | CELA1             | nonsynonymous SNV      | CELA1:NM_001971:exon7:c.A728G:p.Q243R              | NA                                 | rs17860364  | B  |
| chr12 | 52282060 | 52282060 | C         | T    | exonic       | ANKRD33           | synonymous SNV         | ANKRD33:NM_182608:exon1:c.C90T:p.R30R              | NA                                 | rs697634    | NA |
| chr12 | 52994955 | 52994955 | G         | A    | exonic       | KRT72             | synonymous SNV         | p.P94P,KRT72:NM_001146226:exon1:c.C282T:p.P94P,KR  | NA                                 | rs61747192  | NA |
| chr12 | 53045626 | 53045626 | T         | C    | exonic       | KRT2              | nonsynonymous SNV      | KRT2:NM_000423:exon1:c.A301G:p.S101G               | NA                                 | rs2634041   | NA |
| chr12 | 53070145 | 53070145 | G         | A    | exonic       | KRT1              | synonymous SNV         | KRT1:NM_006121:exon7:c.C1389T:p.R463R              | NA                                 | rs936958    | NA |
| chr12 | 53810134 | 53810136 | TTT       | -    | UTR3         | SP1               | NA                     | NA                                                 | NA                                 | rs147945503 | NA |
| chr12 | 54475448 | 54475448 | G         | C    | ncRNA_exonic | LOC100240735      | NA                     | NA                                                 | NA                                 | rs4016762   | NA |
| chr12 | 54905815 | 54905815 | C         | G    | exonic       | NCKAP1L           | synonymous SNV         | 84976:exon9:c.C717G:p.L239L,NCKAP1L:NM_005337:exo  | NA                                 | rs2458409   | NA |
| chr12 | 54973122 | 54973123 | AT        | -    | UTR3         | PPP1R1A           | NA                     | NA                                                 | NA                                 | rs67431222  | NA |
| chr12 | 63041689 | 63041689 | A         | -    | UTR3         | PPM1H             | NA                     | NA                                                 | NA                                 | NA          | NA |
| chr12 | 64538324 | 64538324 | G         | T    | UTR3         | SRGAP1            | NA                     | NA                                                 | NA                                 | rs789736    | NA |
| chr12 | 71094955 | 71094955 | C         | T    | exonic       | PTPRR             | nonsynonymous SNV      | 016:exon4:c.G538A:p.V180I,PTPRR:NM_001207015:exon  | NA                                 | rs35387004  | B  |
| chr12 | 76747082 | 76747082 | T         | -    | UTR3         | OSBPL8            | NA                     | NA                                                 | NA                                 | rs34398462  | NA |
| chr12 | 78530979 | 78530979 | G         | A    | exonic       | NAV3              | synonymous SNV         | NAV3:NM_014903:exon19:c.G4464A:p.Q1488Q            | NA                                 | rs1852464   | NA |
| chr12 | 93196422 | 93196422 | T         | G    | exonic       | EEA1              | nonsynonymous SNV      | EEA1:NM_003566:exon19:c.A2428C:p.K810Q             | NA                                 | rs10745623  | B  |
| chr12 | 93963873 | 93963873 | C         | T    | ncRNA_UTR5   | SOCS2             | NA                     | NA                                                 | NA                                 | rs2200160   | NA |
| chr12 | 1.01E+08 | 1.01E+08 | TTTTTTTTT | -    | UTR3         | SLC17A8           | NA                     | NA                                                 | NA                                 | rs71091442  | NA |

|       |          |          |          |           |              |                  |                   |                                                    |                                    |             |    |
|-------|----------|----------|----------|-----------|--------------|------------------|-------------------|----------------------------------------------------|------------------------------------|-------------|----|
| chr12 | 1.01E+08 | 1.01E+08 | G        | A         | exonic       | ANO4             | nonsynonymous SNV | ANO4:NM_178826:exon6:c.G455A:p.R152K               | NA                                 | NA          | B  |
| chr12 | 1.03E+08 | 1.03E+08 | G        | A         | exonic       | PARPBP           | synonymous SNV    | PARPBP:NM_017915:exon2:c.G138A:p.A46A              | NA                                 | rs2036771   | NA |
| chr12 | 1.03E+08 | 1.03E+08 | -        | TG        | UTR3         | IGF1             | NA                | NA                                                 | NA                                 | rs34621369  | NA |
| chr12 | 1.04E+08 | 1.04E+08 | G        | A         | exonic       | STAB2            | synonymous SNV    | STAB2:NM_017564:exon6:c.G558A:p.A186A              | NA                                 | rs147053330 | NA |
| chr12 | 1.04E+08 | 1.04E+08 | C        | T         | exonic       | STAB2            | synonymous SNV    | STAB2:NM_017564:exon31:c.C3339T:p.N1113N           | ID=COSM147590;OCCURENCE=1(stomach) | rs703651    | NA |
| chr12 | 1.04E+08 | 1.04E+08 | A        | G         | UTR3         | NT5DC3           | NA                | NA                                                 | NA                                 | rs10735389  | NA |
| chr12 | 1.04E+08 | 1.04E+08 | C        | T         | ncRNA_exonic | GNN              | NA                | NA                                                 | NA                                 | rs11612613  | NA |
| chr12 | 1.06E+08 | 1.06E+08 | -        | ATGAAG    | UTR3         | NUAK1            | NA                | NA                                                 | NA                                 | rs11283073  | NA |
| chr12 | 1.07E+08 | 1.07E+08 | A        | G         | exonic       | CRY1             | synonymous SNV    | CRY1:NM_004075:exon5:c.T636C:p.G212G               | NA                                 | rs8192440   | NA |
| chr12 | 1.14E+08 | 1.14E+08 | G        | C         | exonic       | RBM19            | synonymous SNV    | 506T,RBM19:NM_001146699:exon15:c.C1818G:p.T606T,f  | NA                                 | rs2290790   | NA |
| chr12 | 1.19E+08 | 1.19E+08 | C        | T         | exonic       | TAOK3            | nonsynonymous SNV | TAOK3:NM_016281:exon4:c.G140A:p.S47N               | NA                                 | rs428073    | B  |
| chr12 | 1.2E+08  | 1.2E+08  | A        | -         | UTR3         | SRRM4            | NA                | NA                                                 | NA                                 | rs11305482  | NA |
| chr12 | 1.23E+08 | 1.23E+08 | A        | G         | UTR3         | HCAR1            | NA                | NA                                                 | NA                                 | rs7313367   | NA |
| chr12 | 1.29E+08 | 1.29E+08 | A        | G         | UTR3         | TMEM132C         | NA                | NA                                                 | NA                                 | NA          | NA |
| chr12 | 1.31E+08 | 1.31E+08 | G        | T         | UTR5         | GPR133           | NA                | NA                                                 | NA                                 | rs56090874  | NA |
| chr13 | 25356053 | 25356053 | T        | C         | exonic       | RNF17            | synonymous SNV    | 84993:exon6:c.T582C:p.F194F,RNF17:NM_031277:exon6  | NA                                 | rs9707144   | NA |
| chr13 | 26125490 | 26125490 | G        | A         | exonic       | ATP8A2           | synonymous SNV    | ATP8A2:NM_016529:exon11:c.G906A:p.A302A            | NA                                 | rs9581388   | NA |
| chr13 | 28874659 | 28874666 | CACACACA | -         | UTR3         | FLT1             | NA                | NA                                                 | NA                                 | rs200186804 | NA |
| chr13 | 32890572 | 32890572 | G        | A         | UTR5         | BRCA2            | NA                | NA                                                 | NA                                 | rs1799943   | NA |
| chr13 | 36744800 | 36744800 | G        | A         | exonic       | 1C169-SOHLH2,SOH | synonymous SNV    | 110:c.C1125T:p.Y375Y,CCDC169-SOHLH2:NM_001198910:  | ID=COSM147666;OCCURENCE=1(stomach) | rs2296967   | NA |
| chr13 | 36876372 | 36876375 | TATC     | -         | UTR3         | SPG20            | NA                | NA                                                 | NA                                 | rs150662490 | NA |
| chr13 | 41133064 | 41133064 | -        | T         | UTR3         | FOXO1            | NA                | NA                                                 | NA                                 | NA          | NA |
| chr13 | 41385658 | 41385658 | C        | A         | ncRNA_UTR3   | SLC25A15         | NA                | NA                                                 | NA                                 | rs41515050  | NA |
| chr13 | 46537757 | 46537757 | G        | A         | UTR3         | ZC3H13           | NA                | NA                                                 | NA                                 | rs17350833  | NA |
| chr13 | 50102992 | 50102992 | T        | C         | UTR3         | PHF11            | NA                | NA                                                 | NA                                 | rs3033      | NA |
| chr13 | 50466780 | 50466780 | C        | T         | ncRNA_exonic | CTAGE10P         | NA                | NA                                                 | NA                                 | rs189224500 | NA |
| chr13 | 60240491 | 60240491 | C        | A         | UTR3         | DIAPH3           | NA                | NA                                                 | NA                                 | rs200390524 | NA |
| chr13 | 1.04E+08 | 1.04E+08 | -        | T         | ncRNA_exonic | METTL21EP        | NA                | NA                                                 | NA                                 | NA          | NA |
| chr13 | 1.11E+08 | 1.11E+08 | G        | A         | exonic       | COL4A2           | nonsynonymous SNV | COL4A2:NM_001846:exon22:c.G1550A:p.R517K           | NA                                 | rs7990383   | B  |
| chr13 | 1.14E+08 | 1.14E+08 | ACAC     | -         | UTR3         | ATP11A           | NA                | NA                                                 | NA                                 | rs72007310  | NA |
| chr13 | 1.14E+08 | 1.14E+08 | AT       | -         | UTR3         | ATP11A           | NA                | NA                                                 | NA                                 | rs3832908   | NA |
| chr13 | 1.14E+08 | 1.14E+08 | C        | A         | UTR3         | DCUN1D2          | NA                | NA                                                 | NA                                 | rs9577553   | NA |
| chr14 | 20811332 | 20811332 | C        | T         | ncRNA_exonic | RPPH1            | NA                | NA                                                 | NA                                 | rs3093872   | NA |
| chr14 | 20811476 | 20811476 | -        | A         | ncRNA_exonic | RPPH1            | NA                | NA                                                 | NA                                 | NA          | NA |
| chr14 | 24409799 | 24409799 | A        | G         | ncRNA_exonic | DHRS4-AS1        | NA                | NA                                                 | NA                                 | rs113551151 | NA |
| chr14 | 24410262 | 24410262 | C        | G         | ncRNA_exonic | DHRS4-AS1        | NA                | NA                                                 | NA                                 | rs58941536  | NA |
| chr14 | 50448984 | 50448984 | A        | C         | UTR3         | C14orf182        | NA                | NA                                                 | NA                                 | rs7161196   | NA |
| chr14 | 55533924 | 55533925 | TT       | -         | UTR3         | MAPK1IP1L        | NA                | NA                                                 | NA                                 | NA          | NA |
| chr14 | 61112736 | 61112736 | T        | -         | UTR3         | SIX1             | NA                | NA                                                 | NA                                 | rs112733948 | NA |
| chr14 | 61177729 | 61177729 | -        | TATATA    | UTR3         | SIX4             | NA                | NA                                                 | NA                                 | rs142920801 | NA |
| chr14 | 64937308 | 64937317 | AAAAAAAA | -         | UTR3         | AKAP5            | NA                | NA                                                 | NA                                 | NA          | NA |
| chr14 | 69352230 | 69352230 | G        | A         | exonic       | ACTN1            | synonymous SNV    | 1L,ACTN1:NM_001130004:exon12:c.C1297T:p.L433L,ACTN | NA                                 | rs15993     | NA |
| chr14 | 73459917 | 73459917 | C        | T         | exonic       | ZFYVE1           | synonymous SNV    | ZFYVE1:NM_021260:exon4:c.G1137A:p.E379E            | NA                                 | rs2333016   | NA |
| chr14 | 75388803 | 75388803 | G        | A         | UTR5         | RPS6KL1          | NA                | NA                                                 | NA                                 | rs7158047   | NA |
| chr14 | 77491190 | 77491190 | -        | AG        | UTR3         | IRF2BPL          | NA                | NA                                                 | NA                                 | rs200696373 | NA |
| chr14 | 77599140 | 77599140 | -        | CTCTCTCTC | UTR3         | ZDHHC22          | NA                | NA                                                 | NA                                 | rs142042377 | NA |
| chr14 | 88647759 | 88647759 | C        | T         | UTR3         | KCNK10           | NA                | NA                                                 | NA                                 | rs201163029 | NA |
| chr14 | 92582472 | 92582472 | G        | A         | UTR3         | NDUFB1           | NA                | NA                                                 | NA                                 | rs13350     | NA |
| chr14 | 94912896 | 94912896 | T        | G         | exonic       | SERPINA11        | nonsynonymous SNV | SERPINA11:NM_001080451:exon3:c.A689C:p.E230A       | NA                                 | rs57740714  | D  |
| chr14 | 94933709 | 94933709 | C        | T         | exonic       | SERPINA9         | synonymous SNV    | 39:exon3:c.G693A:p.E231E,SERPINA9:NM_001042518:exc | NA                                 | rs6575433   | NA |
| chr14 | 95107973 | 95107973 | C        | T         | ncRNA_exonic | SERPINA13P       | NA                | NA                                                 | NA                                 | rs4905226   | NA |
| chr14 | 96871104 | 96871104 | G        | A         | exonic       | AK7              | nonsynonymous SNV | AK7:NM_152327:exon3:c.G305A:p.R102Q                | NA                                 | rs2275554   | P  |
| chr14 | 1.01E+08 | 1.01E+08 | A        | T         | UTR5         | WARS             | NA                | NA                                                 | NA                                 | rs7143006   | NA |
| chr14 | 1.05E+08 | 1.05E+08 | C        | T         | UTR5         | AKT1             | NA                | NA                                                 | NA                                 | rs10138227  | NA |
| chr14 | 1.05E+08 | 1.05E+08 | C        | T         | ncRNA_exonic | LINC00638        | NA                | NA                                                 | NA                                 | rs12894160  | NA |
| chr14 | 1.05E+08 | 1.05E+08 | C        | G         | exonic       | AHNAK2           | nonsynonymous SNV | AHNAK2:NM_138420:exon7:c.G9625C:p.V3209L           | NA                                 | rs201181175 | NA |
| chr14 | 1.07E+08 | 1.07E+08 | G        | C         | ncRNA_exonic | LINC00221        | NA                | NA                                                 | NA                                 | rs10873578  | NA |
| chr14 | 1.07E+08 | 1.07E+08 | C        | G         | ncRNA_exonic | LINC00221        | NA                | NA                                                 | ID=COSN393151;OCCURENCE=1(lung)    | rs11160980  | NA |
| chr14 | 1.07E+08 | 1.07E+08 | T        | G         | ncRNA_exonic | LINC00221        | NA                | NA                                                 | NA                                 | rs11160981  | NA |
| chr15 | 21134563 | 21134563 | A        | G         | ncRNA_exonic | NF1P2            | NA                | NA                                                 | NA                                 | rs145897182 | NA |
| chr15 | 22703218 | 22703218 | A        | G         | ncRNA_exonic | GOLGA8DP         | NA                | NA                                                 | NA                                 | rs1822555   | NA |
| chr15 | 23005380 | 23005380 | -        | C         | UTR3         | NIPA2            | NA                | NA                                                 | NA                                 | rs35420735  | NA |

|       |          |          |     |       |              |             |                        |                                                     |                                               |             |    |
|-------|----------|----------|-----|-------|--------------|-------------|------------------------|-----------------------------------------------------|-----------------------------------------------|-------------|----|
| chr15 | 23448270 | 23448270 | G   | T     | ncRNA_exonic | GOLGA8EP    | NA                     | NA                                                  | NA                                            | rs200235850 | NA |
| chr15 | 24813154 | 24813154 | T   | C     | ncRNA_exonic | PWRN1       | NA                     | NA                                                  | NA                                            | rs28574764  | NA |
| chr15 | 28096538 | 28096538 | A   | G     | exonic       | OCA2        | synonymous SNV         | OCA2:NM_000275:exon22:c.T2328C:p.A776A              | NA                                            | rs1800419   | NA |
| chr15 | 41024303 | 41024303 | T   | C     | UTR3         | RAD51       | NA                     | NA                                                  | NA                                            | rs11855560  | NA |
| chr15 | 41099899 | 41099899 | -   | GGGGC | exonic       | ZFYVE19     | frameshift insertion   | .112_113insGGGGC:p.W38fs,ZFYVE19:NM_001258420:ex    | NA                                            | rs142730574 | NA |
| chr15 | 42159290 | 42159290 | C   | T     | exonic       | SPTBN5      | nonsynonymous SNV      | SPTBN5:NM_016642:exon36:c.G6347A:p.R2116Q           | NA                                            | rs2290553   | NA |
| chr15 | 42834962 | 42834962 | C   | T     | UTR3         | LRRC57      | NA                     | NA                                                  | NA                                            | rs75705010  | NA |
| chr15 | 52611451 | 52611451 | A   | G     | exonic       | MYO5A       | synonymous SNV         | 5:exon37:c.T4884C:p.D1628D,MYO5A:NM_000259:exon     | NA                                            | rs2290332   | NA |
| chr15 | 60714879 | 60714879 | -   | A     | UTR3         | NARG2       | NA                     | NA                                                  | NA                                            | NA          | NA |
| chr15 | 62146078 | 62146078 | A   | -     | UTR3         | VPS13C      | NA                     | NA                                                  | NA                                            | rs5813123   | NA |
| chr15 | 71276491 | 71276491 | G   | A     | exonic       | LRRC49      | nonsynonymous SNV      | 60Q,LRRC49:NM_017691:exon11:c.G1064A:p.R355Q,LRF    | NA                                            | NA          | B  |
| chr15 | 75581791 | 75581791 | G   | A     | exonic       | GOLGA6D     | synonymous SNV         | GOLGA6D:NM_001145224:exon8:c.G618A:p.K206K          | NA                                            | NA          | NA |
| chr15 | 78792881 | 78792883 | AAA | -     | UTR3         | IREB2       | NA                     | NA                                                  | NA                                            | NA          | NA |
| chr15 | 81585177 | 81585177 | A   | C     | exonic       | IL16        | synonymous SNV         | :exon11:c.A1701C:p.P567P,IL16:NM_001172128:exon12:c | NA                                            | NA          | NA |
| chr15 | 1E+08    | 1E+08    | C   | T     | ncRNA_exonic | DNM1P46     | NA                     | NA                                                  | NA                                            | NA          | NA |
| chr15 | 1E+08    | 1E+08    | A   | G     | ncRNA_exonic | DNM1P46     | NA                     | NA                                                  | NA                                            | rs2458579   | NA |
| chr15 | 1.03E+08 | 1.03E+08 | C   | T     | ncRNA_exonic | WASH3P      | NA                     | NA                                                  | NA                                            | rs1045862   | NA |
| chr16 | 332992   | 332992   | T   | C     | UTR3         | ARHGDI3     | NA                     | NA                                                  | NA                                            | rs443338    | NA |
| chr16 | 781633   | 781633   | G   | A     | exonic       | NARFL       | synonymous SNV         | NARFL:NM_022493:exon9:c.C966T:p.H322H               | ID=COSM1178439;OCCURENCE=1(prostate)          | rs3829492   | NA |
| chr16 | 903965   | 903965   | T   | G     | UTR3         | LMF1        | NA                     | NA                                                  | NA                                            | NA          | NA |
| chr16 | 1139446  | 1139446  | G   | T     | UTR3         | C1QTNF8     | NA                     | NA                                                  | NA                                            | rs183188    | NA |
| chr16 | 1291454  | 1291454  | G   | A     | exonic       | TPSAB1      | nonsynonymous SNV      | TPSAB1:NM_003294:exon4:c.G253A:p.A85T               | NA                                            | rs1141968   | B  |
| chr16 | 1448690  | 1448690  | A   | C     | UTR3         | UNKL        | NA                     | NA                                                  | NA                                            | NA          | NA |
| chr16 | 2031405  | 2031405  | T   | C     | UTR5         | NOXO1       | NA                     | NA                                                  | NA                                            | rs56268858  | NA |
| chr16 | 4751045  | 4751045  | C   | T     | exonic       | ANKS3       | nonsynonymous SNV      | 929:exon8:c.G889A:p.A297T,ANKS3:NM_133450:exon11    | ID=COSM148013;OCCURENCE=1(stomach)            | rs863980    | B  |
| chr16 | 10524657 | 10524659 | GAC | -     | exonic       | ATF7IP2     | nonframeshift deletion | :c.180_182del:p.60_61del,ATF7IP2:NM_001256160:exon  | NA                                            | rs56252625  | NA |
| chr16 | 12061912 | 12061912 | -   | T     | UTR3         | TNFRSF17    | NA                     | NA                                                  | NA                                            | NA          | NA |
| chr16 | 14529754 | 14529755 | CA  | -     | UTR3         | PARN        | NA                     | NA                                                  | NA                                            | NA          | NA |
| chr16 | 18839362 | 18839362 | T   | C     | exonic       | SMG1        | synonymous SNV         | SMG1:NM_015092:exon55:c.A9732G:p.A3244A             | NA                                            | rs12445870  | NA |
| chr16 | 20748331 | 20748331 | C   | A     | exonic       | THUMPD1     | nonsynonymous SNV      | THUMPD1:NM_017736:exon4:c.G933T:p.E311D             | NA                                            | rs11074471  | NA |
| chr16 | 21078693 | 21078693 | T   | G     | exonic       | DNAH3       | synonymous SNV         | DNAH3:NM_017539:exon24:c.A3429C:p.A1143A            | NA                                            | rs861424    | NA |
| chr16 | 23598584 | 23598584 | C   | T     | exonic       | NDUFAB1     | synonymous SNV         | NDUFAB1:NM_005003:exon2:c.G225A:p.T75T              | NA                                            | rs139679834 | NA |
| chr16 | 24836091 | 24836091 | A   | -     | UTR3         | TNRC6A      | NA                     | NA                                                  | NA                                            | NA          | NA |
| chr16 | 46693621 | 46693621 | -   | A     | UTR3         | VPS35       | NA                     | NA                                                  | NA                                            | rs34926621  | NA |
| chr16 | 46773999 | 46773999 | C   | A     | exonic       | MYLK3       | nonsynonymous SNV      | MYLK3:NM_182493:exon2:c.G538T:p.V180L               | ID=COSM148070,COSM148071;OCCURENCE=1(stomach) | rs28407821  | D  |
| chr16 | 48258198 | 48258198 | C   | T     | exonic       | ABCC11      | nonsynonymous SNV      | 180R,ABCC11:NM_032583:exon5:c.G538A:p.G180R,ABCC    | NA                                            | rs17822931  | D  |
| chr16 | 50264211 | 50264211 | -   | A     | UTR3         | PAPD5       | NA                     | NA                                                  | NA                                            | rs34413257  | NA |
| chr16 | 55794514 | 55794514 | C   | T     | ncRNA_exonic | CES1P1      | NA                     | NA                                                  | NA                                            | rs7199449   | NA |
| chr16 | 56510842 | 56510842 | G   | C     | UTR3         | OGFOD1      | NA                     | NA                                                  | NA                                            | rs111625702 | NA |
| chr16 | 68857441 | 68857441 | T   | C     | exonic       | CDH1        | synonymous SNV         | CDH1:NM_004360:exon13:c.T2076C:p.A692A              | NA                                            | rs1801552   | NA |
| chr16 | 69385641 | 69385641 | A   | G     | exonic       | TMED6       | nonsynonymous SNV      | TMED6:NM_144676:exon1:c.T16C:p.F6L                  | NA                                            | rs76116020  | B  |
| chr16 | 70164334 | 70164334 | A   | G     | exonic       | P DPR       | nonsynonymous SNV      | P DPR:NM_017990:exon7:c.A616G:p.I206V               | ID=COSM148098;OCCURENCE=1(stomach)            | rs10852462  | NA |
| chr16 | 70506907 | 70506907 | T   | C     | exonic       | FUK         | synonymous SNV         | FUK:NM_145059:exon15:c.T1428C:p.P476P               | ID=COSM1128894;OCCURENCE=1(prostate)          | rs7192865   | NA |
| chr16 | 70569215 | 70569215 | A   | T     | exonic       | SF3B3       | synonymous SNV         | SF3B3:NM_012426:exon6:c.A717T:p.P239P               | NA                                            | rs33910368  | NA |
| chr16 | 74452071 | 74452071 | G   | A     | exonic       | CLEC18B     | synonymous SNV         | CLEC18B:NM_001011880:exon3:c.C342T:p.P114P          | NA                                            | rs62056016  | NA |
| chr16 | 74920191 | 74920191 | G   | A     | exonic       | WDR59       | synonymous SNV         | WDR59:NM_030581:exon24:c.C2523T:p.R841R             | NA                                            | rs14308     | NA |
| chr16 | 75327916 | 75327916 | A   | G     | exonic       | CFDP1       | synonymous SNV         | CFDP1:NM_006324:exon7:c.T834C:p.L278L               | NA                                            | rs6624      | NA |
| chr16 | 84522897 | 84522897 | G   | C     | exonic       | TLDC1       | nonsynonymous SNV      | TLDC1:NM_020947:exon4:c.C516G:p.D172E               | ID=COSM1128850;OCCURENCE=1(prostate)          | rs436278    | B  |
| chr16 | 84779168 | 84779168 | G   | A     | exonic       | USP10       | nonsynonymous SNV      | :exon4:c.G1081A:p.E361K,USP10:NM_001272075:exon5    | NA                                            | NA          | NA |
| chr16 | 85009567 | 85009567 | T   | C     | UTR3         | ZDHHC7      | NA                     | NA                                                  | NA                                            | NA          | NA |
| chr16 | 89334787 | 89334787 | C   | T     | UTR3         | ANKRD11     | NA                     | NA                                                  | NA                                            | rs9635535   | NA |
| chr17 | 1606883  | 1606883  | T   | G     | UTR3         | TLCD2       | NA                     | NA                                                  | NA                                            | rs8068949   | NA |
| chr17 | 2310332  | 2310332  | G   | A     | ncRNA_exonic | LOC284009   | NA                     | NA                                                  | NA                                            | rs74415860  | NA |
| chr17 | 3352294  | 3352294  | A   | G     | exonic       | SPATA22     | nonsynonymous SNV      | 170697:exon6:c.T479C:p.I160T,SPATA22:NM_001170698:  | NA                                            | rs1488689   | B  |
| chr17 | 3352331  | 3352331  | C   | T     | exonic       | SPATA22     | nonsynonymous SNV      | 3697:exon6:c.G442A:p.V148M,SPATA22:NM_001170698:    | NA                                            | rs1488690   | B  |
| chr17 | 3564711  | 3564711  | -   | G     | UTR3         | CTNS        | NA                     | NA                                                  | NA                                            | NA          | NA |
| chr17 | 5288983  | 5288983  | T   | C     | UTR3         | RABEP1      | NA                     | NA                                                  | NA                                            | rs7426      | NA |
| chr17 | 6556194  | 6556194  | -   | AGAAG | UTR3         | C17orf100   | NA                     | NA                                                  | NA                                            | rs144808411 | NA |
| chr17 | 7482019  | 7482019  | A   | -     | ncRNA_exonic | SEN3-EIF4A1 | NA                     | NA                                                  | NA                                            | NA          | NA |
| chr17 | 7838406  | 7838406  | T   | C     | exonic       | CNTROB      | synonymous SNV         | 7144:exon4:c.T537C:p.N179N,CNTROB:NM_053051:exor    | NA                                            | NA          | NA |
| chr17 | 8064081  | 8064081  | -   | G     | UTR3         | VAMP2       | NA                     | NA                                                  | NA                                            | NA          | NA |
| chr17 | 8633310  | 8633310  | C   | T     | UTR3         | CCDC42      | NA                     | NA                                                  | NA                                            | rs1971773   | NA |

|       |          |          |          |       |              |               |                   |                                                     |                                                 |             |    |
|-------|----------|----------|----------|-------|--------------|---------------|-------------------|-----------------------------------------------------|-------------------------------------------------|-------------|----|
| chr17 | 16842912 | 16842912 | A        | G     | exonic       | TNFRSF13B     | synonymous SNV    | TNFRSF13B:NM_012452:exon5:c.T831C:p.S277S           | NA                                              | rs11078355  | NA |
| chr17 | 18682505 | 18682505 | T        | C     | exonic       | FBXW10        | nonsynonymous SNV | 5:exon13:c.T2894C:p.V965A,FBXW10:NM_001267585:exc   | ID=COSM436168;OCCURENCE=1(prostate)             | rs1024657   | B  |
| chr17 | 18694277 | 18694277 | G        | A     | exonic       | TVP23B        | nonsynonymous SNV | TVP23B:NM_016078:exon3:c.G164A:p.G55E               | NA                                              | rs61075345  | B  |
| chr17 | 20768134 | 20768134 | C        | T     | UTR3         | CCDC144NL     | NA                | NA                                                  | NA                                              | rs201667905 | NA |
| chr17 | 21217727 | 21217727 | T        | C     | UTR3         | MAP2K3        | NA                | NA                                                  | NA                                              | rs2363370   | NA |
| chr17 | 21217764 | 21217764 | G        | A     | UTR3         | MAP2K3        | NA                | NA                                                  | NA                                              | rs2363192   | NA |
| chr17 | 21311916 | 21311916 | C        | T     | UTR5         | KCNJ12,KCNJ18 | NA                | NA                                                  | NA                                              | rs1657716   | NA |
| chr17 | 21311940 | 21311940 | T        | C     | UTR5         | KCNJ12,KCNJ18 | NA                | NA                                                  | NA                                              | rs1714903   | NA |
| chr17 | 21319407 | 21319407 | C        | T     | exonic       | KCNJ12,KCNJ18 | synonymous SNV    | 194958:exon3:c.C753T:p.I251I,KCNJ12:NM_021012:exon: | NA                                              | rs16962951  | NA |
| chr17 | 21319465 | 21319465 | T        | C     | exonic       | KCNJ12,KCNJ18 | synonymous SNV    | .94958:exon3:c.T811C:p.L271L,KCNJ12:NM_021012:exon: | ID=COSM312199;OCCURENCE=1(lung)                 | rs77724065  | NA |
| chr17 | 21323033 | 21323033 | C        | T     | UTR3         | KCNJ12        | NA                | NA                                                  | NA                                              | rs72842126  | NA |
| chr17 | 21323034 | 21323034 | G        | A     | UTR3         | KCNJ12        | NA                | NA                                                  | NA                                              | rs72842128  | NA |
| chr17 | 21323049 | 21323049 | C        | T     | UTR3         | KCNJ12        | NA                | NA                                                  | NA                                              | rs75724776  | NA |
| chr17 | 26206414 | 26206414 | C        | A     | UTR3         | LYRM9         | NA                | NA                                                  | NA                                              | rs3751972   | NA |
| chr17 | 27187789 | 27187789 | C        | T     | UTR3         | ERAL1         | NA                | NA                                                  | NA                                              | rs6803      | NA |
| chr17 | 29862282 | 29862282 | A        | -     | UTR3         | RAB11FIP4     | NA                | NA                                                  | NA                                              | rs35637322  | NA |
| chr17 | 33307586 | 33307586 | G        | A     | UTR5         | LIG3          | NA                | NA                                                  | NA                                              | rs12945428  | NA |
| chr17 | 33448818 | 33448818 | T        | C     | exonic       | FNDC8         | nonsynonymous SNV | FNDC8:NM_017559:exon1:c.T106C:p.S36P                | NA                                              | rs1871892   | B  |
| chr17 | 37223344 | 37223344 | G        | T     | ncRNA_UTR3   | PLXDC1        | NA                | NA                                                  | NA                                              | rs72821577  | NA |
| chr17 | 39211189 | 39211189 | C        | G     | exonic       | KRTAP2-2      | nonsynonymous SNV | KRTAP2-2:NM_033032:exon1:c.G275C:p.C92S             | NA                                              | NA          | NA |
| chr17 | 39395019 | 39395019 | G        | T     | UTR3         | KRTAP9-8      | NA                | NA                                                  | NA                                              | rs74975222  | NA |
| chr17 | 39727816 | 39727816 | T        | G     | exonic       | KRT9          | synonymous SNV    | KRT9:NM_000226:exon1:c.A429C:p.G143G                | NA                                              | rs8075921   | NA |
| chr17 | 39958344 | 39958344 | T        | C     | UTR3         | LEPREL4       | NA                | NA                                                  | NA                                              | rs1061843   | NA |
| chr17 | 41064988 | 41064995 | TTTTAGAA | -     | UTR3         | G6PC          | NA                | NA                                                  | NA                                              | rs71157674  | NA |
| chr17 | 42876925 | 42876925 | -        | A     | UTR3         | GJC1          | NA                | NA                                                  | NA                                              | NA          | NA |
| chr17 | 46802286 | 46802286 | T        | C     | UTR3         | HOXB13        | NA                | NA                                                  | NA                                              | NA          | NA |
| chr17 | 46941419 | 46941419 | G        | T     | UTR3         | CALCOCO2      | NA                | NA                                                  | NA                                              | rs6504584   | NA |
| chr17 | 54450134 | 54450134 | G        | A     | exonic       | ANKFN1        | synonymous SNV    | ANKFN1:NM_153228:exon6:c.G738A:p.K246K              | NA                                              | rs8069322   | NA |
| chr17 | 54912339 | 54912339 | G        | A     | exonic       | DGKE          | synonymous SNV    | DGKE:NM_003647:exon2:c.G183A:p.G61G                 | NA                                              | rs1048159   | NA |
| chr17 | 60342186 | 60342186 | T        | C     | ncRNA_exonic | TBC1D3P2      | NA                | NA                                                  | NA                                              | rs11550753  | NA |
| chr17 | 62122727 | 62122727 | A        | G     | exonic       | ERN1          | nonsynonymous SNV | ERN1:NM_001433:exon20:c.T2645C:p.L882P              | NA                                              | NA          | NA |
| chr17 | 62892413 | 62892413 | G        | A     | exonic       | LRRC37A3      | synonymous SNV    | LRRC37A3:NM_199340:exon3:c.C963T:p.A321A            | NA                                              | rs3894937   | NA |
| chr17 | 64208285 | 64208285 | C        | G     | exonic       | APOH          | nonsynonymous SNV | APOH:NM_000042:exon8:c.G1004C:p.W335S               | NA                                              | rs1801690   | D  |
| chr17 | 67017930 | 67017930 | T        | C     | exonic       | ABCA9         | nonsynonymous SNV | ABCA9:NM_080283:exon18:c.A2354G:p.N785S             | NA                                              | rs17684521  | D  |
| chr17 | 72301432 | 72301432 | A        | G     | exonic       | DNAI2         | synonymous SNV    | 810:exon9:c.A1062G:p.E354E,DNAI2:NM_023036:exon9    | NA                                              | rs8073660   | NA |
| chr17 | 72521897 | 72521897 | G        | A     | exonic       | CD300LB       | synonymous SNV    | CD300LB:NM_174892:exon2:c.C471T:p.I157I             | NA                                              | rs17553512  | NA |
| chr17 | 74675810 | 74675810 | G        | A     | UTR3         | MXRA7         | NA                | NA                                                  | NA                                              | rs1065604   | NA |
| chr17 | 74922706 | 74922706 | C        | T     | exonic       | MGAT5B        | synonymous SNV    | iF,MGAT5B:NM_001199172:exon10:c.C1185T:p.F395F,M    | NA                                              | rs33966966  | NA |
| chr17 | 74928758 | 74928758 | C        | T     | exonic       | MGAT5B        | synonymous SNV    | 2F,MGAT5B:NM_001199172:exon11:c.C1323T:p.F441F,M    | NA                                              | rs79286496  | NA |
| chr17 | 76497920 | 76497920 | C        | A     | exonic       | DNAH17        | nonsynonymous SNV | DNAH17:NM_173628:exon34:c.G5226T:p.M1742I           | NA                                              | rs690844    | NA |
| chr17 | 76525759 | 76525759 | G        | C     | exonic       | DNAH17        | nonsynonymous SNV | DNAH17:NM_173628:exon22:c.C3302G:p.A1101G           | NA                                              | rs61741523  | NA |
| chr17 | 76670610 | 76670610 | T        | G     | UTR3         | CYTH1         | NA                | NA                                                  | NA                                              | NA          | NA |
| chr18 | 334742   | 334742   | C        | T     | exonic       | COLEC12       | nonsynonymous SNV | COLEC12:NM_130386:exon6:c.G1816A:p.G606S            | NA                                              | rs2305027   | D  |
| chr18 | 2943456  | 2943456  | -        | TGTT  | ncRNA_exonic | LOC727896     | NA                | NA                                                  | NA                                              | NA          | NA |
| chr18 | 6986227  | 6986227  | G        | A     | exonic       | LAMA1         | nonsynonymous SNV | LAMA1:NM_005559:exon37:c.C5288T:p.A1763V            | NA                                              | rs12607841  | B  |
| chr18 | 8069868  | 8069868  | C        | T     | exonic       | PTPRM         | synonymous SNV    | i244:exon8:c.C1317T:p.N439N,PTPRM:NM_002845:exon8   | NA                                              | rs2230601   | NA |
| chr18 | 9887607  | 9887607  | T        | C     | exonic       | TXNDC2        | synonymous SNV    | 8529:exon2:c.T1131C:p.S377S,TXNDC2:NM_032243:exon   | NA                                              | NA          | NA |
| chr18 | 14542867 | 14542867 | C        | T     | exonic       | POTEC         | synonymous SNV    | POTEC:NM_001137671:exon1:c.G279A:p.T93T             | NA                                              | rs200779556 | NA |
| chr18 | 14779969 | 14779969 | C        | G     | exonic       | ANKRD30B      | nonsynonymous SNV | ANKRD30B:NM_001145029:exon11:c.C1431G:p.F477L       | D=COSM1130088,COSM1130087;OCCURENCE=1(prostate) | rs9675365   | NA |
| chr18 | 20577669 | 20577669 | G        | A     | exonic       | RBBP8         | synonymous SNV    | 705K,RBBP8:NM_203291:exon14:c.G2115A:p.K705K,RBBI   | NA                                              | rs17852769  | NA |
| chr18 | 33848663 | 33848663 | -        | TACAT | UTR3         | MOCOS         | NA                | NA                                                  | NA                                              | rs111317566 | NA |
| chr18 | 42644774 | 42644774 | A        | -     | UTR3         | SETBP1        | NA                | NA                                                  | NA                                              | rs57937684  | NA |
| chr18 | 43331751 | 43331751 | A        | T     | UTR3         | SLC14A1       | NA                | NA                                                  | NA                                              | rs544373    | NA |
| chr18 | 47088655 | 47088655 | T        | G     | UTR5         | LIPG          | NA                | NA                                                  | NA                                              | rs34474737  | NA |
| chr18 | 47908556 | 47908556 | G        | A     | exonic       | SKA1          | nonsynonymous SNV | 039535:exon4:c.G271A:p.V91I,SKA1:NM_145060:exon4:c  | NA                                              | rs6507992   | B  |
| chr18 | 48325302 | 48325302 | C        | A     | UTR3         | MRO           | NA                | NA                                                  | NA                                              | rs2849256   | NA |
| chr18 | 50432602 | 50432602 | C        | G     | exonic       | DCC           | nonsynonymous SNV | DCC:NM_005215:exon3:c.C601G:p.R201G                 | NA                                              | rs2229080   | D  |
| chr18 | 51887123 | 51887123 | C        | T     | exonic       | C18orf54      | synonymous SNV    | C18orf54:NM_173529:exon2:c.C181T:p.L61L             | NA                                              | rs1657904   | NA |
| chr18 | 55862847 | 55862847 | G        | A     | UTR5         | NEDD4L        | NA                | NA                                                  | NA                                              | rs1008899   | NA |
| chr18 | 56962800 | 56962801 | AA       | -     | UTR3         | CPLX4         | NA                | NA                                                  | NA                                              | rs61050481  | NA |
| chr18 | 56963852 | 56963852 | T        | G     | UTR3         | CPLX4         | NA                | NA                                                  | NA                                              | rs17696504  | NA |
| chr18 | 59712463 | 59712463 | G        | A     | UTR3         | PIGN          | NA                | NA                                                  | NA                                              | rs28375341  | NA |

|       |          |          |       |          |              |             |                   |                                                     |                                            |             |    |
|-------|----------|----------|-------|----------|--------------|-------------|-------------------|-----------------------------------------------------|--------------------------------------------|-------------|----|
| chr18 | 59780393 | 59780393 | T     | A        | exonic       | PIGN        | nonsynonymous SNV | 27:exon15:c.A1408T:p.I470L,PIGN:NM_176787:exon16:c. | NA                                         | rs3862712   | NA |
| chr18 | 59814268 | 59814268 | G     | A        | exonic       | PIGN        | synonymous SNV    | 327:exon8:c.C741T:p.H247H,PIGN:NM_176787:exon9:c.C  | NA                                         | rs9320000   | NA |
| chr18 | 60237388 | 60237388 | A     | G        | exonic       | ZCCHC2      | synonymous SNV    | ZCCHC2:NM_017742:exon12:c.A1899G:p.S633S            | NA                                         | rs8096750   | NA |
| chr18 | 61377579 | 61377579 | A     | C        | exonic       | SERPINB11   | unknown           | UNKNOWN                                             | NA                                         | rs1395268   | NA |
| chr18 | 67509199 | 67509199 | C     | T        | UTR3         | DOK6        | NA                | NA                                                  | NA                                         | rs72953879  | NA |
| chr18 | 67509199 | 67509199 | -     | GTGTGTGT | UTR3         | DOK6        | NA                | NA                                                  | NA                                         | rs143503551 | NA |
| chr18 | 67836217 | 67836217 | A     | G        | exonic       | RTTN        | synonymous SNV    | RTTN:NM_173630:exon12:c.T1563C:p.I521I              | NA                                         | rs200975487 | NA |
| chr18 | 72168608 | 72168608 | G     | A        | exonic       | CNDP2       | synonymous SNV    | l68499:exon2:c.G105A:p.P35P,CNDP2:NM_018235:exon3   | ID=COSM148444;OCCURENCE=1(stomach)         | rs2303463   | NA |
| chr18 | 74728109 | 74728109 | -     | TT       | UTR3         | MBP         | NA                | NA                                                  | NA                                         | NA          | NA |
| chr19 | 1086993  | 1086993  | T     | -        | UTR3         | POLR2E      | NA                | NA                                                  | NA                                         | NA          | NA |
| chr19 | 1954128  | 1954128  | T     | C        | ncRNA_exonic | CSNK1G2-AS1 | NA                | NA                                                  | NA                                         | rs62129474  | NA |
| chr19 | 3593004  | 3593004  | A     | G        | UTR3         | GIPC3       | NA                | NA                                                  | NA                                         | rs17433775  | NA |
| chr19 | 3767265  | 3767265  | C     | T        | exonic       | MRPL54      | synonymous SNV    | MRPL54:NM_172251:exon3:c.C291T:p.F97F               | NA                                         | rs7239      | NA |
| chr19 | 3805793  | 3805793  | T     | C        | UTR3         | ZFR2        | NA                | NA                                                  | NA                                         | rs4807513   | NA |
| chr19 | 3823292  | 3823292  | G     | A        | exonic       | ZFR2        | synonymous SNV    | ZFR2:NM_015174:exon8:c.C1323T:p.P441P               | NA                                         | rs61744821  | NA |
| chr19 | 4153655  | 4153655  | G     | T        | UTR5         | CREB3L3     | NA                | NA                                                  | NA                                         | NA          | NA |
| chr19 | 4236996  | 4236996  | G     | A        | exonic       | EBI3        | nonsynonymous SNV | EBI3:NM_005755:exon5:c.G601A:p.V201I                | NA                                         | rs4740      | B  |
| chr19 | 4442999  | 4442999  | T     | G        | exonic       | CHAF1A      | nonsynonymous SNV | CHAF1A:NM_005483:exon15:c.T2848G:p.S950A            | NA                                         | rs243383    | B  |
| chr19 | 4502937  | 4502937  | A     | C        | UTR3         | PLIN4       | NA                | NA                                                  | NA                                         | NA          | NA |
| chr19 | 5153606  | 5153606  | G     | A        | UTR3         | KDM4B       | NA                | NA                                                  | NA                                         | rs11514     | NA |
| chr19 | 5206775  | 5206775  | A     | G        | UTR3         | PTPRS       | NA                | NA                                                  | NA                                         | rs1143700   | NA |
| chr19 | 5910015  | 5910015  | -     | G        | UTR3         | VMAC        | NA                | NA                                                  | NA                                         | rs76336657  | NA |
| chr19 | 6312290  | 6312290  | T     | C        | exonic       | ACER1       | nonsynonymous SNV | ACER1:NM_133492:exon3:c.A220G:p.M74V                | NA                                         | rs72981971  | D  |
| chr19 | 6718387  | 6718387  | G     | C        | exonic       | C3          | nonsynonymous SNV | C3:NM_000064:exon3:c.C304G:p.R102G                  | NA                                         | rs2230199   | B  |
| chr19 | 7056553  | 7056553  | C     | T        | exonic       | MBD3L3      | nonsynonymous SNV | MBD3L3:NM_001164425:exon2:c.G407A:p.R136H           | NA                                         | rs199680919 | NA |
| chr19 | 7547074  | 7547074  | A     | C        | exonic       | PEX11G      | nonsynonymous SNV | 70539:exon3:c.T273G:p.C91W,PEX11G:NM_080662:exon    | NA                                         | rs2303146   | B  |
| chr19 | 7977929  | 7977929  | C     | -        | UTR3         | MAP2K7      | NA                | NA                                                  | NA                                         | NA          | NA |
| chr19 | 7977931  | 7977931  | CTC   | -        | UTR3         | MAP2K7      | NA                | NA                                                  | NA                                         | NA          | NA |
| chr19 | 7978407  | 7978407  | G     | A        | UTR3         | MAP2K7      | NA                | NA                                                  | NA                                         | rs4804835   | NA |
| chr19 | 10089262 | 10089262 | G     | A        | exonic       | COL5A3      | synonymous SNV    | COL5A3:NM_015719:exon41:c.C3006T:p.P1002P           | NA                                         | rs12610207  | NA |
| chr19 | 10179657 | 10179657 | G     | A        | ncRNA_exonic | C3P1        | NA                | NA                                                  | NA                                         | rs897803    | NA |
| chr19 | 10664256 | 10664256 | -     | TAA      | UTR3         | KRI1        | NA                | NA                                                  | NA                                         | rs201847069 | NA |
| chr19 | 11406839 | 11406839 | C     | G        | UTR5         | TSPAN16     | NA                | NA                                                  | NA                                         | rs453766    | NA |
| chr19 | 12091196 | 12091196 | C     | A        | UTR3         | ZNF763      | NA                | NA                                                  | NA                                         | rs78037958  | NA |
| chr19 | 12091196 | 12091196 | -     | A        | UTR3         | ZNF763      | NA                | NA                                                  | NA                                         | NA          | NA |
| chr19 | 12774537 | 12774537 | G     | A        | exonic       | MAN2B1      | nonsynonymous SNV | 28:exon5:c.C743T:p.P248L,MAN2B1:NM_001173498:exo    | NA                                         | rs117843968 | D  |
| chr19 | 13054781 | 13054781 | G     | T        | UTR3         | CALR        | NA                | NA                                                  | NA                                         | rs1049481   | NA |
| chr19 | 14682804 | 14682804 | G     | C        | exonic       | NDUFB7      | synonymous SNV    | NDUFB7:NM_004146:exon1:c.C9G:p.A3A                  | NA                                         | rs9543      | NA |
| chr19 | 14769339 | 14769339 | C     | G        | exonic       | EMR3        | nonsynonymous SNV | EMR3:NM_032571:exon5:c.G379C:p.E127Q                | NA                                         | rs4606855   | B  |
| chr19 | 15996820 | 15996820 | G     | A        | exonic       | CYP4F2      | synonymous SNV    | CYP4F2:NM_001082:exon9:c.C1029T:p.H343H             | NA                                         | rs2074900   | NA |
| chr19 | 17452859 | 17452863 | CTTCC | -        | UTR3         | GTPBP3      | NA                | NA                                                  | NA                                         | rs5827368   | NA |
| chr19 | 17660300 | 17660300 | G     | A        | exonic       | FAM129C     | nonsynonymous SNV | i24:exon15:c.G1807A:p.G603S,FAM129C:NM_173544:exc   | ID=COSM148530;OCCURENCE=1(stomach)         | rs11666267  | B  |
| chr19 | 18499815 | 18499815 | G     | C        | UTR3         | GDF15       | NA                | NA                                                  | NA                                         | rs1054564   | NA |
| chr19 | 18499858 | 18499858 | T     | C        | UTR3         | GDF15       | NA                | NA                                                  | NA                                         | rs1054221   | NA |
| chr19 | 19023853 | 19023853 | T     | C        | exonic       | COPE        | synonymous SNV    | i:p.L43L,COPE:NM_199442:exon2:c.A129G:p.L43L,COPE:N | ID=COSM1178458;OCCURENCE=1(prostate)       | rs3177137   | NA |
| chr19 | 20722787 | 20722787 | A     | T        | UTR3         | ZNF737      | NA                | NA                                                  | NA                                         | rs138165402 | NA |
| chr19 | 21306251 | 21306251 | G     | A        | UTR3         | ZNF714      | NA                | NA                                                  | NA                                         | rs10413226  | NA |
| chr19 | 22156855 | 22156855 | G     | A        | exonic       | ZNF208      | synonymous SNV    | ZNF208:NM_007153:exon4:c.C981T:p.T327T              | NA                                         | rs200969060 | NA |
| chr19 | 22363413 | 22363413 | C     | T        | exonic       | ZNF676      | nonsynonymous SNV | ZNF676:NM_001001411:exon3:c.G1106A:p.G369E          | NA                                         | rs75690456  | B  |
| chr19 | 22363826 | 22363826 | G     | C        | exonic       | ZNF676      | synonymous SNV    | ZNF676:NM_001001411:exon3:c.C693G:p.G231G           | NA                                         | rs7252593   | NA |
| chr19 | 22375868 | 22375868 | C     | T        | exonic       | ZNF676      | nonsynonymous SNV | ZNF676:NM_001001411:exon2:c.G80A:p.G27E             | NA                                         | rs8104929   | B  |
| chr19 | 22379587 | 22379587 | G     | T        | UTR5         | ZNF676      | NA                | NA                                                  | NA                                         | rs2360001   | NA |
| chr19 | 23556605 | 23556605 | A     | G        | exonic       | ZNF91       | synonymous SNV    | ZNF91:NM_003430:exon3:c.T192C:p.Y64Y                | ID=COSM288088;OCCURENCE=1(large_intestine) | rs34740519  | NA |
| chr19 | 32877006 | 32877006 | A     | C        | UTR3         | ZNF507      | NA                | NA                                                  | NA                                         | NA          | NA |
| chr19 | 33088072 | 33088072 | -     | ATCA     | UTR3         | ANKRD27     | NA                | NA                                                  | NA                                         | rs143829091 | NA |
| chr19 | 39980412 | 39980412 | C     | T        | exonic       | TIMM50      | synonymous SNV    | TIMM50:NM_001001563:exon11:c.C1323T:p.F441F         | NA                                         | rs114194716 | NA |
| chr19 | 40389741 | 40389741 | A     | G        | exonic       | FCGBP       | nonsynonymous SNV | FCGBP:NM_003890:exon18:c.T8441C:p.V2814A            | NA                                         | rs141158749 | NA |
| chr19 | 41111069 | 41111069 | G     | A        | exonic       | LTBP4       | unknown           | UNKNOWN                                             | NA                                         | rs2303729   | NA |
| chr19 | 41903220 | 41903220 | G     | A        | exonic       | EXOSC5      | nonsynonymous SNV | EXOSC5:NM_020158:exon1:c.C14T:p.T5M                 | NA                                         | rs10853751  | B  |
| chr19 | 42355886 | 42355886 | -     | TTTG     | UTR3         | DMRTC2      | NA                | NA                                                  | NA                                         | NA          | NA |
| chr19 | 44174249 | 44174249 | C     | T        | exonic       | PLAUR       | synonymous SNV    | A:p.P8P,PLAUR:NM_001005377:exon1:c.G24A:p.P8P,PLA   | NA                                         | rs62639324  | NA |
| chr19 | 46093211 | 46093211 | T     | C        | UTR3         | GPR4        | NA                | NA                                                  | NA                                         | rs1045217   | NA |



|       |          |          |           |            |              |                     |                      |                                                     |                                                |             |    |
|-------|----------|----------|-----------|------------|--------------|---------------------|----------------------|-----------------------------------------------------|------------------------------------------------|-------------|----|
| chr19 | 47824788 | 47824788 | -         | C          | UTR3         | C5AR1               | NA                   | NA                                                  | NA                                             | rs35042977  | NA |
| chr19 | 48305566 | 48305566 | C         | T          | exonic       | TPRX1               | synonymous SNV       | TPRX1:NM_198479:exon2:c.G702A:p.P234P               | ID=COSM998808;OCCURENCE=1(endometrium)         | rs12463317  | NA |
| chr19 | 48343993 | 48343993 | G         | A          | UTR3         | CRX                 | NA                   | NA                                                  | NA                                             | rs55835533  | NA |
| chr19 | 49571425 | 49571425 | G         | C          | UTR3         | KCNA7               | NA                   | NA                                                  | NA                                             | rs62127899  | NA |
| chr19 | 51835892 | 51835892 | -         | G          | exonic       | VSIG10L             | frameshift insertion | SIG10L:NM_001163922:exon10:c.2577_2578insC:p.A859   | NA                                             | NA          | NA |
| chr19 | 51841417 | 51841417 | C         | T          | exonic       | VSIG10L             | nonsynonymous SNV    | VSIG10L:NM_001163922:exon6:c.G1775A:p.R592Q         | NA                                             | rs34380065  | NA |
| chr19 | 51850290 | 51850290 | G         | A          | exonic       | ETFB                | nonsynonymous SNV    | .4763:exon4:c.C734T:p.T245M,ETFB:NM_001985:exon5:c  | NA                                             | rs1130426   | P  |
| chr19 | 53381429 | 53381429 | G         | T          | UTR3         | ZNF320              | NA                   | NA                                                  | NA                                             | rs2162919   | NA |
| chr19 | 53381495 | 53381507 | TTTTTTTTT | -          | UTR3         | ZNF320              | NA                   | NA                                                  | NA                                             | rs71183850  | NA |
| chr19 | 53431516 | 53431516 | T         | C          | ncRNA_exonic | ZNF321P             | NA                   | NA                                                  | NA                                             | rs12984436  | NA |
| chr19 | 53914545 | 53914545 | -         | T          | UTR3         | ZNF765              | NA                   | NA                                                  | NA                                             | NA          | NA |
| chr19 | 53996692 | 53996695 | TTTC      | -          | UTR3         | ZNF813              | NA                   | NA                                                  | NA                                             | rs139084525 | NA |
| chr19 | 54378454 | 54378467 | iTGTGTGTG | -          | UTR3         | MYADM               | NA                   | NA                                                  | NA                                             | NA          | NA |
| chr19 | 54726870 | 54726870 | C         | G          | UTR5         | LILRB3              | NA                   | NA                                                  | NA                                             | rs117942579 | NA |
| chr19 | 54962467 | 54962467 | G         | A          | UTR5         | LENG8               | NA                   | NA                                                  | NA                                             | rs1035451   | NA |
| chr19 | 55247827 | 55247827 | -         | TCCT       | UTR3         | KIR3DL3             | NA                   | NA                                                  | NA                                             | NA          | NA |
| chr19 | 55247987 | 55247987 | -         | :CTTTCCTC/ | UTR3         | KIR3DL3             | NA                   | NA                                                  | NA                                             | NA          | NA |
| chr19 | 55253544 | 55253544 | A         | G          | exonic       | KIR2DL3             | synonymous SNV       | KIR2DL3:NM_015868:exon3:c.A189G:p.E63E              | NA                                             | rs34790392  | NA |
| chr19 | 55253552 | 55253552 | T         | A          | exonic       | KIR2DL3             | nonsynonymous SNV    | KIR2DL3:NM_015868:exon3:c.T197A:p.F66Y              | ID=COSM321259;OCCURENCE=1(lung)                | rs673568    | NA |
| chr19 | 55253601 | 55253601 | G         | A          | exonic       | KIR2DL3             | synonymous SNV       | KIR2DL3:NM_015868:exon3:c.G246A:p.K82K              | NA                                             | rs201337670 | NA |
| chr19 | 55294454 | 55294454 | C         | T          | exonic       | KIR2DL1             | nonsynonymous SNV    | KIR2DL1:NM_014218:exon6:c.C796T:p.R266C             | NA                                             | rs151328241 | NA |
| chr19 | 55330019 | 55330019 | C         | T          | exonic       | KIR3DL1             | nonsynonymous SNV    | KIR3DL1:NM_013289:exon3:c.C320T:p.S107L             | NA                                             | rs143159382 | NA |
| chr19 | 55358681 | 55358681 | T         | A          | exonic       | KIR2DS4             | unknown              | UNKNOWN                                             | NA                                             | NA          | NA |
| chr19 | 55401412 | 55401412 | T         | C          | UTR3         | FCAR                | NA                   | NA                                                  | NA                                             | rs59103589  | NA |
| chr19 | 55401447 | 55401447 | G         | T          | UTR3         | FCAR                | NA                   | NA                                                  | NA                                             | rs58560391  | NA |
| chr19 | 55401474 | 55401474 | T         | C          | UTR3         | FCAR                | NA                   | NA                                                  | NA                                             | rs60304316  | NA |
| chr19 | 55401481 | 55401481 | A         | G          | UTR3         | FCAR                | NA                   | NA                                                  | NA                                             | rs59309328  | NA |
| chr19 | 55424424 | 55424426 | TTT       | -          | UTR3         | NCR1                | NA                   | NA                                                  | NA                                             | rs200857637 | NA |
| chr19 | 55435140 | 55435140 | T         | C          | exonic       | NLRP7               | nonsynonymous SNV    | A,NLRP7:NM_001127255:exon11:c.A3082G:p.T1028A,NL    | NA                                             | rs7256020   | B  |
| chr19 | 55441995 | 55441995 | A         | G          | exonic       | NLRP7               | synonymous SNV       | .Y894Y,NLRP7:NM_139176:exon9:c.T2598C:p.Y866Y,NLR   | NA                                             | rs269951    | NA |
| chr19 | 55715309 | 55715309 | C         | T          | exonic       | PTPRH               | nonsynonymous SNV    | PTPRH:NM_002842:exon5:c.G727A:p.V243I               | NA                                             | rs45535035  | B  |
| chr19 | 55715319 | 55715319 | C         | G          | exonic       | PTPRH               | synonymous SNV       | PTPRH:NM_002842:exon5:c.G717C:p.S239S               | NA                                             | rs9304763   | NA |
| chr19 | 56047448 | 56047448 | A         | G          | exonic       | SBK2                | nonsynonymous SNV    | SBK2:NM_001101401:exon2:c.T214C:p.C72R              | NA                                             | rs310453    | B  |
| chr19 | 56162776 | 56162776 | C         | T          | exonic       | CCDC106             | synonymous SNV       | CCDC106:NM_013301:exon5:c.C441T:p.S147S             | NA                                             | rs2287791   | NA |
| chr19 | 56388364 | 56388364 | T         | A          | exonic       | NLRP4               | stopgain SNV         | NLRP4:NM_134444:exon8:c.T2528A:p.L843X              | NA                                             | NA          | NA |
| chr19 | 57770975 | 57770975 | T         | C          | UTR3         | ZNF805              | NA                   | NA                                                  | NA                                             | rs10420472  | NA |
| chr19 | 57841082 | 57841082 | G         | A          | UTR3         | ZNF543              | NA                   | NA                                                  | NA                                             | rs78764250  | NA |
| chr19 | 58968875 | 58968875 | A         | C          | UTR3         | ZNF324B             | NA                   | NA                                                  | NA                                             | rs1077420   | NA |
| chr20 | 3677736  | 3677736  | T         | G          | exonic       | SIGLEC1             | synonymous SNV       | SIGLEC1:NM_023068:exon9:c.A2376C:p.V792V            | NA                                             | rs673114    | NA |
| chr20 | 3762095  | 3762095  | T         | C          | UTR5         | SPEF1               | NA                   | NA                                                  | NA                                             | rs2281479   | NA |
| chr20 | 6104068  | 6104068  | C         | T          | UTR5         | FERMT1              | NA                   | NA                                                  | NA                                             | rs2295433   | NA |
| chr20 | 13695607 | 13695607 | T         | G          | exonic       | ESF1                | nonsynonymous SNV    | i380:exon14:c.A2470C:p.I824L,ESF1:NM_016649:exon14: | NA                                             | rs34414644  | B  |
| chr20 | 17463053 | 17463053 | G         | A          | UTR3         | PCSK2               | NA                   | NA                                                  | NA                                             | NA          | NA |
| chr20 | 25124088 | 25124088 | G         | A          | ncRNA_exonic | LOC284798           | NA                   | NA                                                  | NA                                             | rs6050363   | NA |
| chr20 | 25752057 | 25752057 | G         | A          | ncRNA_exonic | FAM182B             | NA                   | NA                                                  | NA                                             | NA          | NA |
| chr20 | 26064330 | 26064330 | C         | T          | ncRNA_exonic | FAM182A             | NA                   | NA                                                  | NA                                             | rs151022794 | NA |
| chr20 | 26064408 | 26064408 | T         | A          | ncRNA_exonic | FAM182A             | NA                   | NA                                                  | NA                                             | NA          | NA |
| chr20 | 29623159 | 29623159 | A         | G          | ncRNA_exonic | FRG1B               | NA                   | NA                                                  | NA                                             | NA          | NA |
| chr20 | 29632638 | 29632638 | C         | A          | ncRNA_exonic | FRG1B               | NA                   | NA                                                  | NA                                             | rs9647043   | NA |
| chr20 | 29633900 | 29633900 | A         | G          | ncRNA_exonic | FRG1B               | NA                   | NA                                                  | ID=COSM1136772,COSM1136771;OCCURENCE=1(kidney) | rs60081496  | NA |
| chr20 | 31505189 | 31505189 | C         | T          | intergenic   | list=66978),SUN5(di | NA                   | NA                                                  | NA                                             | rs13043425  | NA |
| chr20 | 31627291 | 31627291 | A         | G          | exonic       | BPIFB6              | nonsynonymous SNV    | BPIFB6:NM_174897:exon10:c.A1039G:p.S347G            | NA                                             | rs4911287   | B  |
| chr20 | 31676804 | 31676804 | A         | C          | exonic       | BPIFB4              | nonsynonymous SNV    | BPIFB4:NM_182519:exon6:c.A959C:p.N320T              | NA                                             | rs2889732   | D  |
| chr20 | 35740794 | 35740794 | T         | C          | exonic       | MROH8               | unknown              | UNKNOWN                                             | NA                                             | rs1744760   | NA |
| chr20 | 42170327 | 42170327 | C         | T          | UTR3         | L3MBTL1             | NA                   | NA                                                  | NA                                             | rs1062943   | NA |
| chr20 | 48570261 | 48570261 | A         | G          | UTR3         | RNF114              | NA                   | NA                                                  | NA                                             | rs141239729 | NA |
| chr20 | 52184901 | 52184901 | A         | C          | UTR3         | ZNF217              | NA                   | NA                                                  | NA                                             | NA          | NA |
| chr20 | 52560856 | 52560857 | TT        | -          | UTR3         | BCAS1               | NA                   | NA                                                  | NA                                             | NA          | NA |
| chr20 | 52836074 | 52836074 | T         | C          | UTR3         | PFDN4               | NA                   | NA                                                  | NA                                             | rs6023044   | NA |
| chr20 | 55940426 | 55940426 | G         | A          | exonic       | RAE1                | synonymous SNV       | .5885:exon5:c.G303A:p.V101V,RAE1:NM_003610:exon5:c  | NA                                             | rs6099582   | NA |
| chr20 | 57571763 | 57571763 | A         | G          | exonic       | CTSZ                | synonymous SNV       | CTSZ:NM_001336:exon5:c.T732C:p.S244S                | NA                                             | rs9760      | NA |
| chr20 | 57609945 | 57609945 | C         | A          | ncRNA_UTR3   | SLMO2               | NA                   | NA                                                  | NA                                             | NA          | NA |

|       |          |          |           |          |              |            |                   |                                                                                                  |                                                     |             |    |
|-------|----------|----------|-----------|----------|--------------|------------|-------------------|--------------------------------------------------------------------------------------------------|-----------------------------------------------------|-------------|----|
| chr20 | 57609945 | 57609945 | -         | A        | ncRNA_UTR3   | SLMO2      | NA                | NA                                                                                               | NA                                                  | NA          | NA |
| chr20 | 60709531 | 60709531 | T         | -        | UTR3         | LSM14B     | NA                | NA                                                                                               | NA                                                  | rs11477488  | NA |
| chr20 | 61941747 | 61941747 | A         | G        | exonic       | COL20A1    | synonymous SNV    | COL20A1:NM_020882:exon11:c.A1278G:p.G426G                                                        | NA                                                  | rs4809287   | NA |
| chr21 | 15558346 | 15558346 | G         | A        | exonic       | LIPI       | synonymous SNV    | LIPI:NM_198996:exon3:c.C540T:p.S180S                                                             | NA                                                  | rs397517    | NA |
| chr21 | 15646405 | 15646405 | C         | A        | ncRNA_exonic | ABCC13     | NA                | NA                                                                                               | NA                                                  | rs2236001   | NA |
| chr21 | 26969703 | 26969703 | T         | C        | exonic       | MRPL39     | synonymous SNV    | 446:exon6:c.A612G:p.K204K,MRPL39:NM_080794:exon6                                                 | NA                                                  | rs1135618   | NA |
| chr21 | 31964885 | 31964885 | T         | G        | exonic       | KRTAP6-3   | nonsynonymous SNV | KRTAP6-3:NM_181605:exon1:c.T121G:p.C41G                                                          | NA                                                  | NA          | NA |
| chr21 | 34923934 | 34923934 | T         | C        | exonic       | SON        | synonymous SNV    | 195:exon3:c.T2397C:p.S799S,SON:NM_138927:exon3:c.TC0SM1030344,COSM1030343;OCCURENCE=2(endometrii | rs200724919                                         | NA          | NA |
| chr21 | 35237608 | 35237608 | T         | C        | exonic       | ITSN1      | synonymous SNV    | ITSN1:NM_003024:exon32:c.T4044C:p.D1348D                                                         | NA                                                  | rs9976801   | NA |
| chr21 | 38121746 | 38121750 | TGACT     | -        | UTR3         | SIM2       | NA                | NA                                                                                               | NA                                                  | rs113168269 | NA |
| chr21 | 38391582 | 38391582 | A         | G        | UTR3         | DSCR6      | NA                | NA                                                                                               | NA                                                  | rs188497473 | NA |
| chr21 | 43131734 | 43131734 | T         | A        | ncRNA_exonic | LINC00479  | NA                | NA                                                                                               | NA                                                  | rs2838094   | NA |
| chr21 | 43306769 | 43306769 | T         | -        | UTR3         | C2CD2      | NA                | NA                                                                                               | NA                                                  | rs11347156  | NA |
| chr21 | 44451935 | 44451935 | -         | A        | UTR3         | PKNOX1     | NA                | NA                                                                                               | NA                                                  | rs138842830 | NA |
| chr21 | 45647837 | 45647853 | ACCACCCC  | -        | UTR3         | ICOSLG     | NA                | NA                                                                                               | NA                                                  | rs67226187  | NA |
| chr22 | 17469049 | 17469049 | C         | A        | exonic       | GAB4       | stopgain SNV      | GAB4:NM_001037814:exon3:c.G487T:p.G163X                                                          | NA                                                  | rs28502153  | NA |
| chr22 | 18520582 | 18520582 | G         | A        | ncRNA_exonic | FLJ41941   | NA                | NA                                                                                               | NA                                                  | rs975826    | NA |
| chr22 | 18775061 | 18775061 | G         | A        | ncRNA_exonic | GGT3P      | NA                | NA                                                                                               | NA                                                  | rs189425726 | NA |
| chr22 | 20387276 | 20387276 | A         | G        | ncRNA_exonic | PI4KAP1    | NA                | NA                                                                                               | NA                                                  | rs2629350   | NA |
| chr22 | 20390444 | 20390444 | A         | G        | ncRNA_exonic | PI4KAP1    | NA                | NA                                                                                               | NA                                                  | rs1892850   | NA |
| chr22 | 22054764 | 22054764 | -         | T        | UTR3         | YPEL1      | NA                | NA                                                                                               | NA                                                  | NA          | NA |
| chr22 | 24314006 | 24314006 | G         | T        | UTR3         | DDTL       | NA                | NA                                                                                               | NA                                                  | rs1006771   | NA |
| chr22 | 25006264 | 25006264 | A         | C        | UTR5         | GGT1       | NA                | NA                                                                                               | NA                                                  | rs199833779 | NA |
| chr22 | 25023441 | 25023441 | C         | T        | exonic       | GGT1       | nonsynonymous SNV | 2365:exon12:c.C1063T:p.R355W,GGT1:NM_005265:exon:                                                | NA                                                  | rs200419006 | B  |
| chr22 | 25024072 | 25024072 | G         | T        | exonic       | GGT1       | nonsynonymous SNV | 2365:exon14:c.G1361T:p.C454F,GGT1:NM_005265:exon:                                                | NA                                                  | rs199681469 | D  |
| chr22 | 25043061 | 25043061 | -         | CCGG     | ncRNA_exonic | POM121L10P | NA                | NA                                                                                               | NA                                                  | NA          | NA |
| chr22 | 26847961 | 26847972 | CGCGCGCG  | -        | UTR3         | HPS4       | NA                | NA                                                                                               | NA                                                  | NA          | NA |
| chr22 | 29754944 | 29754944 | T         | G        | exonic       | AP1B1      | nonsynonymous SNV | 199T,AP1B1:NM_001166019:exon5:c.A296C:p.N99T,AP1B1                                               | NA                                                  | NA          | D  |
| chr22 | 39079921 | 39079921 | T         | -        | UTR3         | TOMM22     | NA                | NA                                                                                               | NA                                                  | NA          | NA |
| chr22 | 44276171 | 44276171 | T         | G        | UTR3         | PNPLA5     | NA                | NA                                                                                               | NA                                                  | rs470093    | NA |
| chr22 | 44708655 | 44708655 | T         | C        | UTR5         | KIAA1644   | NA                | NA                                                                                               | NA                                                  | rs7510924   | NA |
| chr22 | 45592689 | 45592689 | T         | G        | UTR3         | KIAA0930   | NA                | NA                                                                                               | NA                                                  | NA          | NA |
| chrX  | 7023835  | 7023835  | G         | A        | exonic       | HDHD1      | nonsynonymous SNV | 178136:exon2:c.C106T:p.R36C,HDHD1:NM_012080:exon:                                                | NA                                                  | NA          | NA |
| chrX  | 8433461  | 8433461  | T         | C        | UTR5         | VCX3B      | NA                | NA                                                                                               | ID=COSN414126;OCCURENCE=1(urinary_tract)            | rs200308612 | NA |
| chrX  | 11129475 | 11129475 | -         | GGC      | UTR5         | HCCS       | NA                | NA                                                                                               | NA                                                  | rs35297358  | NA |
| chrX  | 16859628 | 16859628 | G         | A        | exonic       | TXLNG      | synonymous SNV    | 683:exon8:c.G930A:p.Q310Q,TXLNG:NM_018360:exon10                                                 | NA                                                  | rs5924530   | NA |
| chrX  | 28807442 | 28807442 | G         | A        | UTR5         | IL1RAPL1   | NA                | NA                                                                                               | ID=COSN414057,COSN414056;OCCURENCE=2(urinary_tract) | rs6526806   | NA |
| chrX  | 47341999 | 47341999 | -         | CGTGCGCG | UTR5         | ZNF41      | NA                | NA                                                                                               | NA                                                  | NA          | NA |
| chrX  | 48045837 | 48045837 | T         | C        | UTR3         | SSX5       | NA                | NA                                                                                               | NA                                                  | rs184913384 | NA |
| chrX  | 48206014 | 48206023 | GTGTGTGTC | -        | UTR3         | SSX3       | NA                | NA                                                                                               | NA                                                  | rs72172699  | NA |
| chrX  | 48770831 | 48770831 | -         | A        | UTR3         | PIM2       | NA                | NA                                                                                               | NA                                                  | NA          | NA |
| chrX  | 48847497 | 48847497 | T         | C        | exonic       | GRIPAP1    | synonymous SNV    | 672:exon6:c.A324G:p.E108E,GRIPAP1:NM_020137:exon7                                                | NA                                                  | rs11545861  | NA |
| chrX  | 68061228 | 68061228 | -         | C        | UTR3         | EFNB1      | NA                | NA                                                                                               | NA                                                  | NA          | NA |
| chrX  | 73037544 | 73037544 | C         | A        | ncRNA_exonic | TSIX       | NA                | NA                                                                                               | NA                                                  | rs5937751   | NA |
| chrX  | 91089881 | 91089881 | C         | G        | UTR5         | PCDH11X    | NA                | NA                                                                                               | NA                                                  | rs3795211   | NA |
| chrX  | 1.1E+08  | 1.1E+08  | GAGG      | -        | UTR3         | CHRD1      | NA                | NA                                                                                               | NA                                                  | rs71931043  | NA |
| chrX  | 1.19E+08 | 1.19E+08 | G         | A        | exonic       | CXorf56    | synonymous SNV    | 1111G,CXorf56:NM_001170569:exon4:c.C228T:p.G76G,C                                                | NA                                                  | rs5910611   | NA |
| chrX  | 1.31E+08 | 1.31E+08 | GA        | -        | UTR3         | RAP2C      | NA                | NA                                                                                               | NA                                                  | NA          | NA |
| chrX  | 1.41E+08 | 1.41E+08 | G         | C        | exonic       | MAGEC1     | nonsynonymous SNV | MAGEC1:NM_005462:exon4:c.G841C:p.V281L                                                           | NA                                                  | rs176044    | NA |
| chrX  | 1.48E+08 | 1.48E+08 | G         | A        | UTR3         | AFF2       | NA                | NA                                                                                               | NA                                                  | rs144890448 | NA |
| chrX  | 1.52E+08 | 1.52E+08 | C         | T        | UTR3         | PNMA5      | NA                | NA                                                                                               | NA                                                  | NA          | NA |
| chrX  | 1.52E+08 | 1.52E+08 | A         | G        | UTR3         | PNMA5      | NA                | NA                                                                                               | NA                                                  | NA          | NA |
| chrX  | 1.53E+08 | 1.53E+08 | TCTCTCTCT | -        | UTR3         | BGN        | NA                | NA                                                                                               | NA                                                  | rs36205859  | NA |

| H2O2 Mutations |          |          |      |     |              |              |                    |                                               |                                   |             |                |
|----------------|----------|----------|------|-----|--------------|--------------|--------------------|-----------------------------------------------|-----------------------------------|-------------|----------------|
| Chr            | Start    | End      | Ref  | Alt | Func.refGene | Gene.refGene | ExonicFunc.refGene | AAChange.refGene                              | cosmic64                          | snp137      | PolyPhen2 Pred |
| chr1           |          | 69511    | A    | G   | exonic       | OR4F5        | nonsynonymous SNV  | OR4F5:NM_001005484:exon1:c.A421G:p.T141A      | NA                                | rs2691305   | B              |
| chr1           | 663815   | 663815   | G    | A   | ncRNA_exonic | LOC100133331 | NA                 | NA                                            | NA                                | rs67356487  | NA             |
| chr1           | 788844   | 788844   | C    | G   | ncRNA_exonic | LOC643837    | NA                 | NA                                            | NA                                | rs10159337  | NA             |
| chr1           | 1263706  | 1263706  | T    | C   | UTR3         | GLTPD1       | NA                 | NA                                            | NA                                | NA          | NA             |
| chr1           | 1375814  | 1375814  | A    | C   | UTR3         | VWA1         | NA                 | NA                                            | NA                                | NA          | NA             |
| chr1           | 1375819  | 1375819  | A    | C   | UTR3         | VWA1         | NA                 | NA                                            | NA                                | rs146709436 | NA             |
| chr1           | 1469598  | 1469598  | C    | G   | UTR3         | ATAD3A       | NA                 | NA                                            | NA                                | rs9439464   | NA             |
| chr1           | 1886475  | 1886475  | C    | A   | UTR3         | KIAA1751     | NA                 | NA                                            | NA                                | NA          | NA             |
| chr1           | 1900232  | 1900232  | T    | C   | exonic       | KIAA1751     | nonsynonymous SNV  | KIAA1751:NM_001080484:exon11:c.A1087G:p.I363V | NA                                | rs16824588  | NA             |
| chr1           | 2123473  | 2123473  | T    | C   | UTR3         | C1orf86      | NA                 | NA                                            | NA                                | NA          | NA             |
| chr1           | 2282610  | 2282610  | T    | G   | ncRNA_exonic | LOC100129534 | NA                 | NA                                            | NA                                | NA          | NA             |
| chr1           | 2984087  | 2984087  | C    | A   | ncRNA_exonic | FLJ42875     | NA                 | NA                                            | NA                                | rs2297829   | NA             |
| chr1           | 3352764  | 3352764  | T    | -   | UTR3         | PRDM16       | NA                 | NA                                            | NA                                | rs35439737  | NA             |
| chr1           | 6526858  | 6526858  | A    | -   | UTR3         | PLEKHG5      | NA                 | NA                                            | NA                                | NA          | NA             |
| chr1           | 7828174  | 7828174  | A    | -   | UTR3         | CAMTA1       | NA                 | NA                                            | NA                                | rs59402168  | NA             |
| chr1           | 10439620 | 10439620 | -    | G   | UTR3         | KIF1B        | NA                 | NA                                            | NA                                | NA          | NA             |
| chr1           | 12203319 | 12203319 | T    | C   | UTR3         | TNFRSF8      | NA                 | NA                                            | NA                                | NA          | NA             |
| chr1           | 12788406 | 12788406 | G    | A   | UTR3         | AADACL3      | NA                 | NA                                            | NA                                | rs3000929   | NA             |
| chr1           | 12854068 | 12854068 | T    | C   | exonic       | PRAMEF1      | nonsynonymous SNV  | PRAMEF1:NM_023013:exon3:c.T292C:p.W98R        | NA                                | rs71245736  | P              |
| chr1           | 12856010 | 12856010 | C    | G   | exonic       | PRAMEF1      | nonsynonymous SNV  | PRAMEF1:NM_023013:exon4:c.C1290G:p.F430L      | NA                                | rs2142947   | B              |
| chr1           | 12856111 | 12856111 | C    | T   | exonic       | PRAMEF1      | nonsynonymous SNV  | PRAMEF1:NM_023013:exon4:c.C1391T:p.P464L      | NA                                | rs2982215   | D              |
| chr1           | 12887453 | 12887453 | C    | T   | exonic       | PRAMEF11     | nonsynonymous SNV  | PRAMEF11:NM_001146344:exon3:c.G404A:p.R135K   | NA                                | rs2486714   | NA             |
| chr1           | 12887480 | 12887480 | C    | T   | exonic       | PRAMEF11     | nonsynonymous SNV  | PRAMEF11:NM_001146344:exon3:c.G377A:p.C126Y   | NA                                | NA          | NA             |
| chr1           | 12919044 | 12919044 | T    | C   | exonic       | PRAMEF2      | synonymous SNV     | PRAMEF2:NM_023014:exon2:c.T180C:p.P60P        | NA                                | NA          | NA             |
| chr1           | 12921265 | 12921265 | G    | A   | exonic       | PRAMEF2      | synonymous SNV     | PRAMEF2:NM_023014:exon4:c.G1056A:p.E352E      | NA                                | rs151184374 | NA             |
| chr1           | 12921272 | 12921272 | G    | A   | exonic       | PRAMEF2      | nonsynonymous SNV  | PRAMEF2:NM_023014:exon4:c.G1063A:p.V355M      | NA                                | rs145044541 | B              |
| chr1           | 12921274 | 12921274 | G    | C   | exonic       | PRAMEF2      | synonymous SNV     | PRAMEF2:NM_023014:exon4:c.G1065C:p.V355V      | NA                                | rs17039302  | NA             |
| chr1           | 12941832 | 12941832 | T    | C   | exonic       | PRAMEF4      | nonsynonymous SNV  | PRAMEF4:NM_001009611:exon3:c.A718G:p.I240V    | NA                                | rs6686974   | NA             |
| chr1           | 12942930 | 12942930 | G    | A   | exonic       | PRAMEF4      | nonsynonymous SNV  | PRAMEF4:NM_001009611:exon2:c.C286T:p.R96C     | NA                                | rs2994117   | NA             |
| chr1           | 12953195 | 12953195 | C    | T   | exonic       | PRAMEF10     | nonsynonymous SNV  | PRAMEF10:NM_001039361:exon4:c.G977A:p.R326H   | NA                                | rs201422133 | B              |
| chr1           | 13036294 | 13036294 | G    | T   | exonic       | PRAMEF22     | nonsynonymous SNV  | PRAMEF22:NM_001100631:exon2:c.G366T:p.R122S   | NA                                | rs200761485 | D              |
| chr1           | 13183188 | 13183188 | T    | A   | exonic       | LOC440563    | nonsynonymous SNV  | LOC440563:NM_001136561:exon2:c.A685T:p.M229L  | NA                                | rs144308453 | NA             |
| chr1           | 13183528 | 13183528 | A    | C   | exonic       | LOC440563    | nonsynonymous SNV  | LOC440563:NM_001136561:exon2:c.T345G:p.F115L  | NA                                | rs76937665  | NA             |
| chr1           | 13183532 | 13183532 | C    | T   | exonic       | LOC440563    | nonsynonymous SNV  | LOC440563:NM_001136561:exon2:c.G341A:p.G114D  | NA                                | rs77505369  | NA             |
| chr1           | 13183533 | 13183533 | C    | T   | exonic       | LOC440563    | nonsynonymous SNV  | LOC440563:NM_001136561:exon2:c.G340A:p.G114S  | NA                                | rs77556803  | NA             |
| chr1           | 13183780 | 13183780 | A    | C   | exonic       | LOC440563    | synonymous SNV     | LOC440563:NM_001136561:exon2:c.T93G:p.S31S    | OSN199380;OCCURENCE=1(large_intes | rs116484938 | NA             |
| chr1           | 15439082 | 15439082 | A    | G   | ncRNA_exonic | TMEM51-AS1   | NA                 | NA                                            | NA                                | NA          | NA             |
| chr1           | 15439098 | 15439098 | C    | T   | ncRNA_exonic | TMEM51-AS1   | NA                 | NA                                            | NA                                | rs114844404 | NA             |
| chr1           | 15440343 | 15440343 | T    | G   | ncRNA_exonic | TMEM51-AS1   | NA                 | NA                                            | NA                                | NA          | NA             |
| chr1           | 15444487 | 15444487 | G    | A   | ncRNA_UTR3   | KAZN         | NA                 | NA                                            | NA                                | rs2235783   | NA             |
| chr1           | 15896199 | 15896199 | G    | A   | UTR3         | DNAJC16      | NA                 | NA                                            | NA                                | rs2145397   | NA             |
| chr1           | 16333143 | 16333146 | AATA | -   | UTR3         | C1orf64      | NA                 | NA                                            | NA                                | rs146554621 | NA             |
| chr1           | 16385178 | 16385178 | G    | A   | exonic       | FAM131C      | synonymous SNV     | FAM131C:NM_182623:exon7:c.C597T:p.P199P       | JSM676526;OCCURENCE=1(prostate),1 | rs80297394  | NA             |
| chr1           | 16793964 | 16793964 | C    | T   | ncRNA_exonic | CROCCP3      | NA                 | NA                                            | NA                                | NA          | NA             |
| chr1           | 16890428 | 16890428 | T    | A   | UTR3         | NBPF1        | NA                 | NA                                            | NA                                | rs3900708   | NA             |
| chr1           | 16913677 | 16913677 | T    | C   | exonic       | NBPF1        | unknown            | UNKNOWN                                       | NA                                | rs200743207 | NA             |
| chr1           | 16945182 | 16945184 | AAT  | -   | ncRNA_exonic | CROCCP2      | NA                 | NA                                            | ID=COSN385177;OCCURENCE=1(lung)   | NA          | NA             |
| chr1           | 16945409 | 16945409 | T    | A   | ncRNA_exonic | CROCCP2      | NA                 | NA                                            | NA                                | rs13566     | NA             |
| chr1           | 16945504 | 16945504 | C    | T   | ncRNA_exonic | CROCCP2      | NA                 | NA                                            | NA                                | rs11378     | NA             |
| chr1           | 16973095 | 16973095 | G    | C   | ncRNA_exonic | MST1P2       | NA                 | NA                                            | NA                                | rs75521993  | NA             |
| chr1           | 16974021 | 16974021 | G    | A   | ncRNA_exonic | MST1P2       | NA                 | NA                                            | NA                                | rs142740321 | NA             |
| chr1           | 16975268 | 16975268 | T    | C   | ncRNA_exonic | MST1P2       | NA                 | NA                                            | NA                                | rs199945491 | NA             |
| chr1           | 16976641 | 16976641 | C    | T   | ncRNA_exonic | MST1P2       | NA                 | NA                                            | NA                                | rs1057417   | NA             |
| chr1           | 16976649 | 16976649 | C    | T   | ncRNA_exonic | MST1P2       | NA                 | NA                                            | NA                                | rs1057333   | NA             |
| chr1           | 16976681 | 16976681 | G    | T   | ncRNA_exonic | MST1P2       | NA                 | NA                                            | ID=COSN162976;OCCURENCE=1(breast) | rs3175284   | NA             |
| chr1           | 16976825 | 16976825 | C    | A   | ncRNA_exonic | MST1P2       | NA                 | NA                                            | ID=COSN404465;OCCURENCE=1(lung)   | rs2761525   | NA             |
| chr1           | 17023126 | 17023126 | C    | G   | ncRNA_exonic | ESPMP        | NA                 | NA                                            | NA                                | rs2610633   | NA             |
| chr1           | 17082975 | 17082975 | A    | G   | UTR3         | MST1L        | NA                 | NA                                            | NA                                | rs1033403   | NA             |
| chr1           | 17083101 | 17083101 | A    | G   | UTR3         | MST1L        | NA                 | NA                                            | NA                                | rs199727569 | NA             |
| chr1           | 17083787 | 17083787 | G    | A   | exonic       | MST1L        | synonymous SNV     | MST1L:NM_001271733:exon15:c.C2010T:p.A670A    | NA                                | rs201551314 | NA             |
| chr1           | 22418253 | 22418253 | G    | T   | UTR3         | CDC42        | NA                 | NA                                            | NA                                | NA          | NA             |
| chr1           | 23518535 | 23518535 | T    | G   | UTR3         | HTR1D        | NA                 | NA                                            | NA                                | NA          | NA             |
| chr1           | 23518571 | 23518571 | T    | G   | UTR3         | HTR1D        | NA                 | NA                                            | NA                                | NA          | NA             |
| chr1           | 23695629 | 23695629 | T    | G   | ncRNA_exonic | C1orf213     | NA                 | NA                                            | NA                                | NA          | NA             |

|      |          |          |       |    |              |              |                   |                                                               |                                  |             |    |
|------|----------|----------|-------|----|--------------|--------------|-------------------|---------------------------------------------------------------|----------------------------------|-------------|----|
| chr1 | 26161107 | 26161108 | AA    | -  | UTR3         | AUNIP        | NA                | NA                                                            | NA                               | rs139695812 | NA |
| chr1 | 26608814 | 26608814 | A     | G  | exonic       | UBXN11       | synonymous SNV    | 79C:p.P393P,UBXN11:NM_145345:exon15:c.T1440C:p.P480P,UBXN11:  | NA                               | rs6672357   | NA |
| chr1 | 26608823 | 26608823 | A     | G  | exonic       | UBXN11       | synonymous SNV    | 70C:p.S390S,UBXN11:NM_145345:exon15:c.T1431C:p.S477S,UBXN11:  | NA                               | rs61775084  | NA |
| chr1 | 26608829 | 26608829 | G     | A  | exonic       | UBXN11       | synonymous SNV    | i4T:p.G388G,UBXN11:NM_145345:exon15:c.C1425T:p.G475G,UBXN11   | NA                               | rs61775085  | NA |
| chr1 | 26608831 | 26608831 | C     | T  | exonic       | UBXN11       | nonsynonymous SNV | i2A:p.G388S,UBXN11:NM_145345:exon15:c.G1423A:p.G475S,UBXN11   | NA                               | rs61775086  | NA |
| chr1 | 26608835 | 26608835 | A     | T  | exonic       | UBXN11       | synonymous SNV    | 8A:p.G386G,UBXN11:NM_145345:exon15:c.T1419A:p.G473G,UBXN11    | NA                               | rs61775087  | NA |
| chr1 | 26797045 | 26797045 | A     | C  | UTR3         | DHDDS        | NA                | NA                                                            | NA                               | NA          | NA |
| chr1 | 27190855 | 27190855 | T     | C  | UTR3         | SFN          | NA                | NA                                                            | NA                               | rs112547702 | NA |
| chr1 | 27248273 | 27248273 | C     | A  | UTR5         | NUDC         | NA                | NA                                                            | NA                               | rs41311274  | NA |
| chr1 | 28087357 | 28087357 | A     | T  | UTR3         | FAM76A       | NA                | NA                                                            | NA                               | NA          | NA |
| chr1 | 28087366 | 28087366 | C     | T  | UTR3         | FAM76A       | NA                | NA                                                            | NA                               | NA          | NA |
| chr1 | 28087368 | 28087368 | A     | T  | UTR3         | FAM76A       | NA                | NA                                                            | NA                               | NA          | NA |
| chr1 | 28087371 | 28087371 | C     | T  | UTR3         | FAM76A       | NA                | NA                                                            | NA                               | NA          | NA |
| chr1 | 28473786 | 28473786 | T     | G  | UTR3         | PTAFR        | NA                | NA                                                            | NA                               | NA          | NA |
| chr1 | 29063236 | 29063236 | G     | A  | UTR5         | YTHDF2       | NA                | NA                                                            | NA                               | rs3738067   | NA |
| chr1 | 31838551 | 31838551 | -     | A  | UTR3         | FABP3        | NA                | NA                                                            | NA                               | NA          | NA |
| chr1 | 32799514 | 32799514 | A     | -  | UTR3         | MARCKSL1     | NA                | NA                                                            | NA                               | rs113450741 | NA |
| chr1 | 33475967 | 33475967 | G     | A  | UTR3         | AK2          | NA                | NA                                                            | NA                               | rs74066437  | NA |
| chr1 | 36386884 | 36386884 | C     | T  | UTR3         | AGO1         | NA                | NA                                                            | NA                               | NA          | NA |
| chr1 | 36386884 | 36386884 | -     | T  | UTR3         | AGO1         | NA                | NA                                                            | NA                               | NA          | NA |
| chr1 | 38226760 | 38226760 | -     | AA | UTR3         | EPHA10       | NA                | NA                                                            | NA                               | NA          | NA |
| chr1 | 38267253 | 38267253 | G     | A  | UTR3         | MANEAL       | NA                | NA                                                            | NA                               | rs28489009  | NA |
| chr1 | 39879211 | 39879211 | A     | G  | exonic       | KIAA0754     | nonsynonymous SNV | KIAA0754:NM_015038:exon1:c.A3274G:p.T1092A                    | NA                               | NA          | NA |
| chr1 | 39879379 | 39879379 | C     | G  | exonic       | KIAA0754     | nonsynonymous SNV | KIAA0754:NM_015038:exon1:c.C3442G:p.P1148A                    | NA                               | rs34074681  | NA |
| chr1 | 39976865 | 39976865 | G     | A  | exonic       | BMP8A        | synonymous SNV    | BMP8A:NM_181809:exon2:c.G354A:p.L118L                         | NA                               | NA          | NA |
| chr1 | 40149642 | 40149642 | G     | T  | exonic       | HPCAL4       | synonymous SNV    | HPCAL4:NM_016257:exon3:c.C345A:p.R115R                        | NA                               | rs784634    | NA |
| chr1 | 41154813 | 41154813 | C     | G  | ncRNA_exonic | LOC100130557 | NA                | NA                                                            | NA                               | rs552147    | NA |
| chr1 | 43272841 | 43272841 | A     | T  | UTR3         | CCDC23       | NA                | NA                                                            | NA                               | rs1044898   | NA |
| chr1 | 43747937 | 43747937 | -     | A  | UTR3         | C1orf210     | NA                | NA                                                            | NA                               | NA          | NA |
| chr1 | 44600190 | 44600191 | CT    | -  | UTR3         | KLF17        | NA                | NA                                                            | NA                               | rs34068395  | NA |
| chr1 | 46806393 | 46806393 | T     | C  | UTR5         | NSUN4        | NA                | NA                                                            | NA                               | rs41293273  | NA |
| chr1 | 46806429 | 46806429 | A     | T  | UTR5         | NSUN4        | NA                | NA                                                            | NA                               | rs41293275  | NA |
| chr1 | 47905783 | 47905785 | TTT   | -  | UTR3         | FOXD2        | NA                | NA                                                            | NA                               | rs56809638  | NA |
| chr1 | 50667062 | 50667062 | -     | A  | UTR3         | ELAVL4       | NA                | NA                                                            | NA                               | NA          | NA |
| chr1 | 53291327 | 53291328 | AA    | -  | UTR3         | ZYG11B       | NA                | NA                                                            | NA                               | NA          | NA |
| chr1 | 53535478 | 53535478 | G     | A  | exonic       | PODN         | nonsynonymous SNV | M_153703:exon2:c.G95A:p.R32H,PODN:NM_001199081:exon3:c.G38/   | NA                               | rs1288386   | P  |
| chr1 | 61869783 | 61869783 | G     | A  | exonic       | NFIA         | synonymous SNV    | J01145511:exon8:c.G1059A:p.P353P,NFIA:NM_005595:exon8:c.G108: | NA                               | rs2236059   | NA |
| chr1 | 61922425 | 61922425 | A     | -  | UTR3         | NFIA         | NA                | NA                                                            | NA                               | rs67346536  | NA |
| chr1 | 65901244 | 65901244 | G     | T  | UTR3         | LEPROT       | NA                | NA                                                            | NA                               | NA          | NA |
| chr1 | 67465988 | 67465988 | A     | -  | UTR3         | SLC35D1      | NA                | NA                                                            | NA                               | rs36007577  | NA |
| chr1 | 67465989 | 67465989 | A     | T  | UTR3         | SLC35D1      | NA                | NA                                                            | NA                               | NA          | NA |
| chr1 | 89446108 | 89446108 | T     | -  | UTR3         | RBMXL1       | NA                | NA                                                            | NA                               | NA          | NA |
| chr1 | 89448896 | 89448896 | A     | T  | exonic       | RBMXL1       | nonsynonymous SNV | _019610:exon2:c.T614A:p.V205D,RBMXL1:NM_001162536:exon3:c.T6  | NA                               | rs200284841 | B  |
| chr1 | 90486412 | 90486412 | T     | G  | exonic       | ZNF326       | synonymous SNV    | ZNF326:NM_182976:exon10:c.T1236G:p.V412V                      | NA                               | rs2816881   | NA |
| chr1 | 94586693 | 94586693 | G     | A  | UTR5         | ABCA4        | NA                | NA                                                            | NA                               | rs200102393 | NA |
| chr1 | 94995411 | 94995411 | C     | A  | UTR3         | F3           | NA                | NA                                                            | NA                               | rs841691    | NA |
| chr1 | 94995491 | 94995491 | C     | T  | UTR3         | F3           | NA                | NA                                                            | NA                               | rs841692    | NA |
| chr1 | 95448279 | 95448279 | G     | A  | UTR3         | ALG14        | NA                | NA                                                            | NA                               | NA          | NA |
| chr1 | 97279218 | 97279222 | TTTTT | -  | UTR3         | PTBP2        | NA                | NA                                                            | NA                               | rs72223356  | NA |
| chr1 | 1.1E+08  | 1.1E+08  | A     | -  | UTR3         | SORT1        | NA                | NA                                                            | NA                               | rs111233099 | NA |
| chr1 | 1.1E+08  | 1.1E+08  | T     | -  | UTR3         | GNAI3        | NA                | NA                                                            | NA                               | NA          | NA |
| chr1 | 1.11E+08 | 1.11E+08 | -     | C  | UTR3         | LRIF1        | NA                | NA                                                            | NA                               | rs142921680 | NA |
| chr1 | 1.12E+08 | 1.12E+08 | C     | -  | UTR3         | CEPT1        | NA                | NA                                                            | NA                               | NA          | NA |
| chr1 | 1.13E+08 | 1.13E+08 | T     | C  | exonic       | CTTNBP2NL    | synonymous SNV    | CTTNBP2NL:NM_018704:exon4:c.T234C:p.N78N                      | )=COSM146582;OCCURENCE=1(stomacl | rs2256883   | NA |
| chr1 | 1.15E+08 | 1.15E+08 | G     | T  | exonic       | AMPD1        | synonymous SNV    | _001172626:exon3:c.C322A:p.R108R,AMPD1:NM_000036:exon4:c.C3:  | NA                               | NA          | NA |
| chr1 | 1.18E+08 | 1.18E+08 | TT    | -  | UTR3         | PTGFRN       | NA                | NA                                                            | NA                               | NA          | NA |
| chr1 | 1.18E+08 | 1.18E+08 | G     | T  | UTR3         | TRIM45       | NA                | NA                                                            | NA                               | rs12118664  | NA |
| chr1 | 1.2E+08  | 1.2E+08  | T     | C  | exonic       | WARS2        | nonsynonymous SNV | WARS2:NM_015836:exon6:c.A866G:p.E289G                         | NA                               | NA          | B  |
| chr1 | 1.21E+08 | 1.21E+08 | T     | C  | exonic       | NOTCH2       | nonsynonymous SNV | 1_001200001:exon2:c.A137G:p.N46S,NOTCH2:NM_024408:exon2:c.A1  | NA                               | rs141882865 | B  |
| chr1 | 1.21E+08 | 1.21E+08 | C     | T  | exonic       | NOTCH2       | nonsynonymous SNV | 1_001200001:exon2:c.G112A:p.E38K,NOTCH2:NM_024408:exon2:c.G1  | NA                               | rs146242578 | B  |
| chr1 | 1.21E+08 | 1.21E+08 | G     | C  | exonic       | NOTCH2       | nonsynonymous SNV | 1_001200001:exon1:c.C57G:p.C19W,NOTCH2:NM_024408:exon1:c.C5:  | NA                               | rs11810554  | NA |
| chr1 | 1.21E+08 | 1.21E+08 | G     | A  | exonic       | NOTCH2       | synonymous SNV    | NM_001200001:exon1:c.C15T:p.R5R,NOTCH2:NM_024408:exon1:c.C1   | NA                               | rs77243975  | NA |
| chr1 | 1.21E+08 | 1.21E+08 | G     | T  | UTR5         | NOTCH2       | NA                | NA                                                            | NA                               | rs57122008  | NA |
| chr1 | 1.21E+08 | 1.21E+08 | G     | A  | UTR3         | FCGR1B       | NA                | NA                                                            | NA                               | rs15571     | NA |
| chr1 | 1.45E+08 | 1.45E+08 | C     | T  | ncRNA_exonic | PFN1P2       | NA                | NA                                                            | NA                               | rs17855859  | NA |
| chr1 | 1.45E+08 | 1.45E+08 | T     | G  | exonic       | NBPF8,NBPF9  | unknown           | UNKNOWN                                                       | NA                               | rs678781    | NA |

|      |          |          |          |   |              |           |                   |                                                                                              |                                   |             |    |
|------|----------|----------|----------|---|--------------|-----------|-------------------|----------------------------------------------------------------------------------------------|-----------------------------------|-------------|----|
| chr1 | 1.45E+08 | 1.45E+08 | TATT     | - | UTR3         | PDE4DIP   | NA                | NA                                                                                           | NA                                | NA          | NA |
| chr1 | 1.45E+08 | 1.45E+08 | T        | C | exonic       | PDE4DIP   | nonsynonymous SNV | p.E2223G,PDE4DIP:NM_014644:exon40:c.A6668G:p.E2223G,PDE4DIP:=COSM1127421;OCCURENCE=2(prostat | rs3844239                         | B           |    |
| chr1 | 1.45E+08 | 1.45E+08 | T        | C | exonic       | SEC22B    | unknown           | UNKNOWN                                                                                      | NA                                | rs2590131   | NA |
| chr1 | 1.45E+08 | 1.45E+08 | C        | T | exonic       | SEC22B    | unknown           | UNKNOWN                                                                                      | NA                                | rs2794040   | NA |
| chr1 | 1.45E+08 | 1.45E+08 | A        | G | UTR5         | NOTCH2NL  | NA                | NA                                                                                           | SN404541,COSN404542;OCCURENCE=1   | rs56159748  | NA |
| chr1 | 1.45E+08 | 1.45E+08 | A        | G | exonic       | NOTCH2NL  | synonymous SNV    | NOTCH2NL:NM_203458:exon3:c.A156G:p.R52R                                                      | NA                                | rs10910778  | NA |
| chr1 | 1.45E+08 | 1.45E+08 | C        | T | exonic       | NOTCH2NL  | nonsynonymous SNV | NOTCH2NL:NM_203458:exon4:c.C473T:p.T158I                                                     | NA                                | rs75586173  | D  |
| chr1 | 1.45E+08 | 1.45E+08 | T        | G | UTR3         | NOTCH2NL  | NA                | NA                                                                                           | NA                                | rs1062341   | NA |
| chr1 | 1.45E+08 | 1.45E+08 | G        | A | UTR3         | NOTCH2NL  | NA                | NA                                                                                           | NA                                | rs201876339 | NA |
| chr1 | 1.45E+08 | 1.45E+08 | G        | A | UTR3         | NOTCH2NL  | NA                | NA                                                                                           | NA                                | rs4649854   | NA |
| chr1 | 1.45E+08 | 1.45E+08 | G        | A | UTR3         | NOTCH2NL  | NA                | NA                                                                                           | NA                                | rs4649855   | NA |
| chr1 | 1.45E+08 | 1.45E+08 | A        | G | UTR3         | NOTCH2NL  | NA                | NA                                                                                           | NA                                | rs4649856   | NA |
| chr1 | 1.45E+08 | 1.45E+08 | G        | A | UTR3         | NOTCH2NL  | NA                | NA                                                                                           | NA                                | rs61814565  | NA |
| chr1 | 1.45E+08 | 1.45E+08 | A        | C | UTR3         | NOTCH2NL  | NA                | NA                                                                                           | NA                                | NA          | NA |
| chr1 | 1.45E+08 | 1.45E+08 | T        | C | exonic       | NBPF10    | nonsynonymous SNV | NBPF10:NM_001039703:exon10:c.T1462C:p.S488P                                                  | M462841,COSM462842;OCCURENCE=2    | rs199529643 | NA |
| chr1 | 1.45E+08 | 1.45E+08 | C        | T | exonic       | NBPF10    | synonymous SNV    | NBPF10:NM_001039703:exon14:c.C1983T:p.Y661Y                                                  | NA                                | NA          | NA |
| chr1 | 1.45E+08 | 1.45E+08 | A        | G | exonic       | NBPF10    | nonsynonymous SNV | NBPF10:NM_001039703:exon14:c.A2014G:p.I672V                                                  | NA                                | NA          | NA |
| chr1 | 1.45E+08 | 1.45E+08 | T        | C | intronic     | NBPF10    | NA                | NA                                                                                           | NA                                | NA          | NA |
| chr1 | 1.45E+08 | 1.45E+08 | GAAGAC   | - | intronic     | NBPF10    | NA                | NA                                                                                           | NA                                | NA          | NA |
| chr1 | 1.45E+08 | 1.45E+08 | A        | C | intronic     | NBPF10    | NA                | NA                                                                                           | NA                                | rs12128680  | NA |
| chr1 | 1.46E+08 | 1.46E+08 | A        | - | ncRNA_exonic | GNRHR2    | NA                | NA                                                                                           | NA                                | rs148070621 | NA |
| chr1 | 1.47E+08 | 1.47E+08 | A        | G | UTR5         | BCL9      | NA                | NA                                                                                           | NA                                | rs10900376  | NA |
| chr1 | 1.49E+08 | 1.49E+08 | G        | A | exonic       | NBPF16    | nonsynonymous SNV | NBPF16:NM_001102663:exon16:c.G1777A:p.G593S                                                  | NA                                | rs201036679 | B  |
| chr1 | 1.49E+08 | 1.49E+08 | A        | G | exonic       | NBPF16    | nonsynonymous SNV | NBPF16:NM_001102663:exon16:c.A1828G:p.R610G                                                  | NA                                | rs16826707  | B  |
| chr1 | 1.49E+08 | 1.49E+08 | A        | C | exonic       | NBPF16    | synonymous SNV    | NBPF16:NM_001102663:exon16:c.C1844C:p.P615P                                                  | NA                                | rs6695216   | B  |
| chr1 | 1.49E+08 | 1.49E+08 | T        | C | ncRNA_exonic | LOC388692 | NA                | NA                                                                                           | NA                                | rs61789482  | NA |
| chr1 | 1.49E+08 | 1.49E+08 | C        | G | ncRNA_exonic | LOC388692 | NA                | NA                                                                                           | NA                                | rs144294857 | NA |
| chr1 | 1.49E+08 | 1.49E+08 | A        | G | ncRNA_exonic | LOC388692 | NA                | NA                                                                                           | NA                                | rs2454126   | NA |
| chr1 | 1.51E+08 | 1.51E+08 | -        | A | UTR3         | GOLPH3L   | NA                | NA                                                                                           | NA                                | NA          | NA |
| chr1 | 1.52E+08 | 1.52E+08 | T        | G | UTR3         | CGN       | NA                | NA                                                                                           | NA                                | NA          | NA |
| chr1 | 1.52E+08 | 1.52E+08 | TTTCTTTC | - | UTR3         | SNX27     | NA                | NA                                                                                           | NA                                | NA          | NA |
| chr1 | 1.52E+08 | 1.52E+08 | C        | T | exonic       | RPTN      | nonsynonymous SNV | RPTN:NM_001122965:exon3:c.G1510A:p.G504R                                                     | NA                                | NA          | B  |
| chr1 | 1.52E+08 | 1.52E+08 | T        | C | exonic       | RPTN      | synonymous SNV    | RPTN:NM_001122965:exon3:c.A1035G:p.Q345Q                                                     | NA                                | NA          | NA |
| chr1 | 1.52E+08 | 1.52E+08 | A        | G | exonic       | RPTN      | synonymous SNV    | RPTN:NM_001122965:exon3:c.T1014C:p.G338G                                                     | NA                                | NA          | NA |
| chr1 | 1.52E+08 | 1.52E+08 | T        | A | exonic       | HRNR      | synonymous SNV    | HRNR:NM_001009931:exon3:c.A6198T:p.P2066P                                                    | NA                                | NA          | NA |
| chr1 | 1.52E+08 | 1.52E+08 | C        | T | exonic       | HRNR      | nonsynonymous SNV | HRNR:NM_001009931:exon3:c.G4241A:p.C1414Y                                                    | NA                                | rs111689937 | NA |
| chr1 | 1.52E+08 | 1.52E+08 | G        | A | exonic       | HRNR      | synonymous SNV    | HRNR:NM_001009931:exon3:c.C3993T:p.G1331G                                                    | NA                                | rs77559827  | NA |
| chr1 | 1.52E+08 | 1.52E+08 | C        | T | exonic       | FLG2      | synonymous SNV    | FLG2:NM_001014342:exon3:c.G2595A:p.S865S                                                     | NA                                | rs12738471  | NA |
| chr1 | 1.52E+08 | 1.52E+08 | A        | G | exonic       | FLG2      | synonymous SNV    | FLG2:NM_001014342:exon3:c.T1851C:p.S617S                                                     | =COSM1127384;OCCURENCE=1(prostat  | rs6679449   | NA |
| chr1 | 1.53E+08 | 1.53E+08 | A        | C | exonic       | KPRP      | nonsynonymous SNV | KPRP:NM_001025231:exon2:c.A845C:p.Y282S                                                      | NA                                | NA          | D  |
| chr1 | 1.53E+08 | 1.53E+08 | A        | C | exonic       | KPRP      | synonymous SNV    | KPRP:NM_001025231:exon2:c.A891C:p.P297P                                                      | NA                                | NA          | NA |
| chr1 | 1.53E+08 | 1.53E+08 | T        | A | exonic       | LCE1D     | synonymous SNV    | LCE1D:NM_178352:exon2:c.T81A:p.P27P                                                          | NA                                | NA          | NA |
| chr1 | 1.53E+08 | 1.53E+08 | A        | G | UTR3         | LCE1C     | NA                | NA                                                                                           | NA                                | NA          | NA |
| chr1 | 1.53E+08 | 1.53E+08 | T        | A | exonic       | IVL       | nonsynonymous SNV | IVL:NM_005547:exon2:c.T614A:p.L205H                                                          | NA                                | NA          | NA |
| chr1 | 1.53E+08 | 1.53E+08 | T        | A | exonic       | IVL       | nonsynonymous SNV | IVL:NM_005547:exon2:c.T644A:p.L215H                                                          | NA                                | NA          | NA |
| chr1 | 1.53E+08 | 1.53E+08 | T        | A | exonic       | IVL       | nonsynonymous SNV | IVL:NM_005547:exon2:c.T674A:p.L225H                                                          | NA                                | NA          | NA |
| chr1 | 1.53E+08 | 1.53E+08 | A        | G | exonic       | IVL       | synonymous SNV    | IVL:NM_005547:exon2:c.A1563G:p.K521K                                                         | NA                                | NA          | NA |
| chr1 | 1.53E+08 | 1.53E+08 | T        | G | exonic       | LOR       | synonymous SNV    | LOR:NM_000427:exon2:c.T822G:p.G274G                                                          | NA                                | NA          | NA |
| chr1 | 1.53E+08 | 1.53E+08 | G        | A | exonic       | LOR       | synonymous SNV    | LOR:NM_000427:exon2:c.G870A:p.G290G                                                          | NA                                | rs12043009  | NA |
| chr1 | 1.54E+08 | 1.54E+08 | A        | - | UTR3         | GATAD2B   | NA                | NA                                                                                           | NA                                | NA          | NA |
| chr1 | 1.54E+08 | 1.54E+08 | -        | A | UTR3         | TPM3      | NA                | NA                                                                                           | NA                                | NA          | NA |
| chr1 | 1.55E+08 | 1.55E+08 | T        | C | UTR5         | ADAR      | NA                | NA                                                                                           | NA                                | NA          | NA |
| chr1 | 1.55E+08 | 1.55E+08 | A        | C | UTR5         | ADAR      | NA                | NA                                                                                           | COSN416145;OCCURENCE=1(urinary_tr | NA          | NA |
| chr1 | 1.55E+08 | 1.55E+08 | T        | G | exonic       | KCNN3     | nonsynonymous SNV | _001204087:exon1:c.A707C:p.H236P,KCNN3:NM_002249:exon1:c.A70                                 | NA                                | NA          | NA |
| chr1 | 1.55E+08 | 1.55E+08 | T        | C | ncRNA_exonic | GBAP1     | NA                | NA                                                                                           | NA                                | rs28445596  | NA |
| chr1 | 1.55E+08 | 1.55E+08 | G        | A | ncRNA_exonic | GBAP1     | NA                | NA                                                                                           | NA                                | rs1057941   | NA |
| chr1 | 1.55E+08 | 1.55E+08 | A        | C | exonic       | RUSC1     | synonymous SNV    | 1105203:exon2:c.A1089C:p.A363A,RUSC1:NM_001105204:exon2:c.A1                                 | NA                                | NA          | NA |
| chr1 | 1.55E+08 | 1.55E+08 | A        | C | exonic       | RUSC1     | nonsynonymous SNV | 1105203:exon2:c.A1105C:p.T369P,RUSC1:NM_001105204:exon2:c.A1                                 | NA                                | NA          | D  |
| chr1 | 1.58E+08 | 1.58E+08 | C        | T | UTR3         | FCRL1     | NA                | NA                                                                                           | NA                                | rs1016849   | NA |
| chr1 | 1.6E+08  | 1.6E+08  | AC       | - | UTR3         | KCNJ10    | NA                | NA                                                                                           | NA                                | NA          | NA |
| chr1 | 1.6E+08  | 1.6E+08  | T        | A | ncRNA_exonic | SUMO1P3   | NA                | NA                                                                                           | NA                                | NA          | NA |
| chr1 | 1.61E+08 | 1.61E+08 | -        | A | UTR3         | DEDD      | NA                | NA                                                                                           | NA                                | NA          | NA |
| chr1 | 1.61E+08 | 1.61E+08 | C        | A | UTR5         | PPOX      | NA                | NA                                                                                           | NA                                | rs2301286   | NA |
| chr1 | 1.61E+08 | 1.61E+08 | C        | G | UTR3         | MPZ       | NA                | NA                                                                                           | NA                                | NA          | NA |
| chr1 | 1.62E+08 | 1.62E+08 | A        | G | exonic       | FCGR3B    | synonymous SNV    | .T219C:p.L73L,FCGR3B:NM_001271036:exon3:c.T63C:p.L21L,FCGR3B:l                               | NA                                | rs447536    | NA |
| chr1 | 1.63E+08 | 1.63E+08 | ACAC     | - | UTR3         | RGS4      | NA                | NA                                                                                           | NA                                | rs5778313   | NA |

|      |          |          |      |    |              |           |                   |                                                                                                 |    |             |    |
|------|----------|----------|------|----|--------------|-----------|-------------------|-------------------------------------------------------------------------------------------------|----|-------------|----|
| chr1 | 1.68E+08 | 1.68E+08 | T    | C  | exonic       | ADCY10    | nonsynonymous SNV | 01167749:exon14:c.A1630G:p.I544V,ADCY10:NM_018417:exon17:c.A                                    | NA | rs2071921   | NA |
| chr1 | 1.68E+08 | 1.68E+08 | ACAC | -  | UTR3         | TIPRL     | NA                | NA                                                                                              | NA | rs66543118  | NA |
| chr1 | 1.69E+08 | 1.69E+08 | A    | T  | UTR3         | ATP1B1    | NA                | NA                                                                                              | NA | NA          | NA |
| chr1 | 1.77E+08 | 1.77E+08 | C    | A  | exonic       | FAM5B     | nonsynonymous SNV | FAM5B:NM_021165:exon6:c.C975A:p.D325E                                                           | NA | NA          | B  |
| chr1 | 1.8E+08  | 1.8E+08  | T    | G  | exonic       | TOR1AIP1  | nonsynonymous SNV | M_001267578:exon1:c.T32G:p.V11G,TOR1AIP1:NM_015602:exon1:c.T                                    | NA | NA          | B  |
| chr1 | 1.83E+08 | 1.83E+08 | -    | GT | UTR3         | NMNAT2    | NA                | NA                                                                                              | NA | NA          | NA |
| chr1 | 1.84E+08 | 1.84E+08 | T    | G  | UTR5         | RGL1      | NA                | NA                                                                                              | NA | NA          | NA |
| chr1 | 1.84E+08 | 1.84E+08 | T    | G  | UTR5         | RGL1      | NA                | NA                                                                                              | NA | NA          | NA |
| chr1 | 1.85E+08 | 1.85E+08 | TT   | -  | UTR3         | RNF2      | NA                | NA                                                                                              | NA | NA          | NA |
| chr1 | 1.86E+08 | 1.86E+08 | A    | C  | exonic       | PRG4      | nonsynonymous SNV | 001127709:exon5:c.A970C:p.T324P,PRG4:NM_001127708:exon6:c.A1=COSM1127223;OCCURENCE=1(prostat    | NA | NA          | NA |
| chr1 | 1.86E+08 | 1.86E+08 | T    | C  | exonic       | PRG4      | synonymous SNV    | 001127709:exon5:c.T1059C:p.T353T,PRG4:NM_001127708:exon6:c.T1                                   | NA | NA          | NA |
| chr1 | 1.86E+08 | 1.86E+08 | T    | C  | exonic       | PRG4      | synonymous SNV    | _001127709:exon5:c.T1227C:p.T409T,PRG4:NM_001127708:exon6:c.T:                                  | NA | NA          | NA |
| chr1 | 1.86E+08 | 1.86E+08 | A    | C  | exonic       | PRG4      | nonsynonymous SNV | 001127709:exon5:c.A1252C:p.T418P,PRG4:NM_001127708:exon6:c.A                                    | NA | NA          | NA |
| chr1 | 1.86E+08 | 1.86E+08 | T    | C  | exonic       | PRG4      | synonymous SNV    | _001127709:exon5:c.T1275C:p.T425T,PRG4:NM_001127708:exon6:c.T:                                  | NA | NA          | NA |
| chr1 | 1.86E+08 | 1.86E+08 | A    | C  | exonic       | PRG4      | nonsynonymous SNV | 001127709:exon5:c.A1384C:p.T462P,PRG4:NM_001127708:exon6:c.A                                    | NA | NA          | NA |
| chr1 | 1.86E+08 | 1.86E+08 | T    | C  | exonic       | PRG4      | synonymous SNV    | _001127709:exon5:c.T1413C:p.T471T,PRG4:NM_001127708:exon6:c.T:                                  | NA | NA          | NA |
| chr1 | 1.86E+08 | 1.86E+08 | T    | C  | exonic       | PRG4      | synonymous SNV    | _001127709:exon5:c.T1485C:p.T495T,PRG4:NM_001127708:exon6:c.T.V392936;OCCURENCE=2(lung),2(endon | NA | NA          | NA |
| chr1 | 1.86E+08 | 1.86E+08 | A    | C  | exonic       | PRG4      | nonsynonymous SNV | 001127709:exon5:c.A1510C:p.T504P,PRG4:NM_001127708:exon6:c.A=COSM1127220;OCCURENCE=1(prostat    | NA | NA          | NA |
| chr1 | 1.86E+08 | 1.86E+08 | G    | C  | exonic       | PRG4      | synonymous SNV    | 001127709:exon5:c.G1596C:p.T532T,PRG4:NM_001127708:exon6:c.G                                    | NA | NA          | NA |
| chr1 | 1.86E+08 | 1.86E+08 | A    | C  | exonic       | PRG4      | nonsynonymous SNV | 001127709:exon5:c.A2140C:p.T714P,PRG4:NM_001127708:exon6:c.A                                    | NA | NA          | NA |
| chr1 | 1.97E+08 | 1.97E+08 | C    | A  | exonic       | CFHR2     | nonsynonymous SNV | CFHR2:NM_005666:exon2:c.C76A:p.P26T                                                             | NA | NA          | D  |
| chr1 | 1.97E+08 | 1.97E+08 | C    | G  | UTR3         | CFHR5     | NA                | NA                                                                                              | NA | NA          | NA |
| chr1 | 1.97E+08 | 1.97E+08 | -    | A  | UTR3         | ZBTB41    | NA                | NA                                                                                              | NA | rs138564806 | NA |
| chr1 | 2.01E+08 | 2.01E+08 | TTC  | -  | UTR3         | KIF14     | NA                | NA                                                                                              | NA | rs146486278 | NA |
| chr1 | 2.01E+08 | 2.01E+08 | C    | T  | exonic       | IGFN1     | synonymous SNV    | IGFN1:NM_001164586:exon12:c.C4815T:p.D1605D                                                     | NA | NA          | NA |
| chr1 | 2.01E+08 | 2.01E+08 | T    | C  | exonic       | IGFN1     | nonsynonymous SNV | IGFN1:NM_001164586:exon12:c.T4823C:p.V1608A                                                     | NA | rs201505263 | NA |
| chr1 | 2.01E+08 | 2.01E+08 | T    | G  | exonic       | IGFN1     | nonsynonymous SNV | IGFN1:NM_001164586:exon12:c.T5099G:p.V1700G                                                     | NA | NA          | NA |
| chr1 | 2.01E+08 | 2.01E+08 | A    | G  | exonic       | IGFN1     | nonsynonymous SNV | IGFN1:NM_001164586:exon12:c.A5288G:p.D1763G                                                     | NA | rs74428176  | NA |
| chr1 | 2.01E+08 | 2.01E+08 | C    | G  | exonic       | IGFN1     | nonsynonymous SNV | IGFN1:NM_001164586:exon12:c.C5300G:p.A1767G                                                     | NA | rs1772845   | NA |
| chr1 | 2.01E+08 | 2.01E+08 | T    | G  | exonic       | IGFN1     | nonsynonymous SNV | IGFN1:NM_001164586:exon12:c.T5359G:p.W1787G                                                     | NA | rs1772844   | NA |
| chr1 | 2.01E+08 | 2.01E+08 | A    | G  | exonic       | IGFN1     | nonsynonymous SNV | IGFN1:NM_001164586:exon12:c.A6256G:p.T2086A                                                     | NA | rs1772839   | NA |
| chr1 | 2.01E+08 | 2.01E+08 | A    | G  | exonic       | IGFN1     | nonsynonymous SNV | IGFN1:NM_001164586:exon12:c.A6296G:p.E2099G                                                     | NA | rs200678915 | NA |
| chr1 | 2.01E+08 | 2.01E+08 | A    | -  | UTR3         | TNNI1     | NA                | NA                                                                                              | NA | rs35058233  | NA |
| chr1 | 2.02E+08 | 2.02E+08 | -    | A  | UTR3         | IPO9      | NA                | NA                                                                                              | NA | NA          | NA |
| chr1 | 2.02E+08 | 2.02E+08 | G    | A  | UTR3         | IPO9      | NA                | NA                                                                                              | NA | rs116072433 | NA |
| chr1 | 2.02E+08 | 2.02E+08 | G    | T  | UTR3         | IPO9      | NA                | NA                                                                                              | NA | rs72742088  | NA |
| chr1 | 2.02E+08 | 2.02E+08 | C    | -  | UTR3         | IPO9      | NA                | NA                                                                                              | NA | rs112011484 | NA |
| chr1 | 2.02E+08 | 2.02E+08 | A    | -  | UTR3         | ELF3      | NA                | NA                                                                                              | NA | rs11303270  | NA |
| chr1 | 2.02E+08 | 2.02E+08 | A    | C  | UTR3         | GPR37L1   | NA                | NA                                                                                              | NA | NA          | NA |
| chr1 | 2.02E+08 | 2.02E+08 | TT   | -  | UTR3         | GPR37L1   | NA                | NA                                                                                              | NA | NA          | NA |
| chr1 | 2.02E+08 | 2.02E+08 | T    | G  | UTR5         | PPP1R12B  | NA                | NA                                                                                              | NA | NA          | NA |
| chr1 | 2.04E+08 | 2.04E+08 | T    | -  | exonic       | KISS1     | stoploss SNV      | KISS1:NM_002256:exon3:c.417delA:p.X139W                                                         | NA | rs71745629  | NA |
| chr1 | 2.04E+08 | 2.04E+08 | A    | T  | ncRNA_exonic | LINC00628 | NA                | NA                                                                                              | NA | NA          | NA |
| chr1 | 2.05E+08 | 2.05E+08 | T    | C  | UTR5         | CDK18     | NA                | NA                                                                                              | NA | rs77694338  | NA |
| chr1 | 2.06E+08 | 2.06E+08 | C    | -  | UTR3         | RAB7L1    | NA                | NA                                                                                              | NA | rs34580135  | NA |
| chr1 | 2.07E+08 | 2.07E+08 | AC   | -  | UTR3         | PIGR      | NA                | NA                                                                                              | NA | NA          | NA |
| chr1 | 2.07E+08 | 2.07E+08 | T    | -  | UTR3         | PFKFB2    | NA                | NA                                                                                              | NA | NA          | NA |
| chr1 | 2.08E+08 | 2.08E+08 | T    | C  | exonic       | CR1       | synonymous SNV    | 00573:exon26:c.T4356C:p.C1452C,CR1:NM_000651:exon34:c.T5706C                                    | NA | rs61734513  | NA |
| chr1 | 2.08E+08 | 2.08E+08 | T    | C  | UTR3         | CR1       | NA                | NA                                                                                              | NA | rs4844385   | NA |
| chr1 | 2.1E+08  | 2.1E+08  | T    | -  | UTR5         | MIR205HG  | NA                | NA                                                                                              | NA | NA          | NA |
| chr1 | 2.11E+08 | 2.11E+08 | T    | C  | UTR3         | KCNH1     | NA                | NA                                                                                              | NA | rs12126648  | NA |
| chr1 | 2.12E+08 | 2.12E+08 | GTGT | -  | UTR5         | RD3       | NA                | NA                                                                                              | NA | NA          | NA |
| chr1 | 2.13E+08 | 2.13E+08 | T    | C  | UTR5         | RPS6KC1   | NA                | NA                                                                                              | NA | rs4951476   | NA |
| chr1 | 2.19E+08 | 2.19E+08 | A    | -  | UTR3         | RRP15     | NA                | NA                                                                                              | NA | rs201597960 | NA |
| chr1 | 2.19E+08 | 2.19E+08 | C    | T  | UTR3         | RRP15     | NA                | NA                                                                                              | NA | NA          | NA |
| chr1 | 2.22E+08 | 2.22E+08 | -    | T  | UTR3         | DUSP10    | NA                | NA                                                                                              | NA | NA          | NA |
| chr1 | 2.23E+08 | 2.23E+08 | C    | T  | exonic       | HHIPL2    | synonymous SNV    | HHIPL2:NM_024746:exon1:c.G99A:p.L33L                                                            | NA | rs4846382   | NA |
| chr1 | 2.24E+08 | 2.24E+08 | T    | C  | UTR5         | SUSD4     | NA                | NA                                                                                              | NA | NA          | NA |
| chr1 | 2.24E+08 | 2.24E+08 | T    | C  | UTR5         | SUSD4     | NA                | NA                                                                                              | NA | NA          | NA |
| chr1 | 2.24E+08 | 2.24E+08 | T    | C  | UTR5         | SUSD4     | NA                | NA                                                                                              | NA | NA          | NA |
| chr1 | 2.24E+08 | 2.24E+08 | G    | T  | exonic       | CAPN8     | unknown           | UNKNOWN                                                                                         | NA | rs35539373  | NA |
| chr1 | 2.25E+08 | 2.25E+08 | -    | T  | UTR3         | WDR26     | NA                | NA                                                                                              | NA | rs5781364   | NA |
| chr1 | 2.26E+08 | 2.26E+08 | A    | -  | UTR3         | ENAH      | NA                | NA                                                                                              | NA | rs146121857 | NA |
| chr1 | 2.26E+08 | 2.26E+08 | TT   | -  | UTR3         | ENAH      | NA                | NA                                                                                              | NA | rs200499155 | NA |
| chr1 | 2.28E+08 | 2.28E+08 | -    | A  | UTR5         | CDC42BPA  | NA                | NA                                                                                              | NA | NA          | NA |
| chr1 | 2.28E+08 | 2.28E+08 | A    | G  | exonic       | WNT9A     | synonymous SNV    | WNT9A:NM_003395:exon2:c.T153C:p.A51A                                                            | NA | rs3795768   | NA |



|      |          |          |      |      |              |                             |                        |                                                                                             |             |             |    |
|------|----------|----------|------|------|--------------|-----------------------------|------------------------|---------------------------------------------------------------------------------------------|-------------|-------------|----|
| chr1 | 2.28E+08 | 2.28E+08 | -    | T    | UTR3         | IBA57                       | NA                     | NA                                                                                          | NA          | NA          | NA |
| chr1 | 2.29E+08 | 2.29E+08 | T    | C    | exonic       | OBSCN                       | nonsynonymous SNV      | :p.C4450R,OBSCN:NM_052843:exon51:c.T13348C:p.C4450R,OBSCN:NI                                | NA          | rs1188732   | NA |
| chr1 | 2.3E+08  | 2.3E+08  | T    | G    | exonic       | ABCB10                      | nonsynonymous SNV      | ABCB10:NM_012089:exon2:c.A605C:p.N202T                                                      | NA          | NA          | B  |
| chr1 | 2.3E+08  | 2.3E+08  | A    | G    | exonic       | URB2                        | synonymous SNV         | URB2:NM_014777:exon9:c.A4290G:p.R1430R                                                      | NA          | rs7521953   | NA |
| chr1 | 2.3E+08  | 2.3E+08  | T    | C    | UTR3         | URB2                        | NA                     | NA                                                                                          | NA          | rs3820361   | NA |
| chr1 | 2.31E+08 | 2.31E+08 | A    | G    | exonic       | ARV1                        | nonsynonymous SNV      | ARV1:NM_022786:exon1:c.A43G:p.N15D                                                          | NA          | NA          | B  |
| chr1 | 2.31E+08 | 2.31E+08 | C    | G    | UTR3         | TRIM67                      | NA                     | NA                                                                                          | NA          | rs6541262   | NA |
| chr1 | 2.31E+08 | 2.31E+08 | G    | T    | UTR3         | TRIM67                      | NA                     | NA                                                                                          | NA          | rs530363    | NA |
| chr1 | 2.31E+08 | 2.31E+08 | T    | -    | UTR3         | EXOC8                       | NA                     | NA                                                                                          | NA          | rs35468792  | NA |
| chr1 | 2.33E+08 | 2.33E+08 | G    | A    | exonic       | SIPA1L2                     | nonsynonymous SNV      | SIPA1L2:NM_020808:exon7:c.C2504T:p.A835V                                                    | NA          | rs142752379 | P  |
| chr1 | 2.37E+08 | 2.37E+08 | C    | T    | exonic       | LGALS8                      | synonymous SNV         | NM_006499:exon5:c.C165T:p.S55S,LGALS8:NM_201543:exon5:c.C165)=COSM146831;OCCURENCE=1(stomac | rs1041936   | NA          | NA |
| chr1 | 2.37E+08 | 2.37E+08 | A    | G    | exonic       | LGALS8                      | nonsynonymous SNV      | M_006499:exon5:c.A166G:p.M56V,LGALS8:NM_201543:exon5:c.A166)=COSM146352;OCCURENCE=1(stomac  | rs1041937   | B           | NA |
| chr1 | 2.37E+08 | 2.37E+08 | T    | C    | exonic       | HEATR1                      | nonsynonymous SNV      | HEATR1:NM_018072:exon15:c.A1819G:p.M607V                                                    | NA          | rs2794763   | D  |
| chr1 | 2.37E+08 | 2.37E+08 | A    | G    | exonic       | MTR                         | synonymous SNV         | MTR:NM_000254:exon29:c.A3144G:p.A1048A                                                      | NA          | rs2229276   | NA |
| chr1 | 2.37E+08 | 2.37E+08 | G    | T    | UTR3         | MTR                         | NA                     | NA                                                                                          | NA          | NA          | NA |
| chr1 | 2.38E+08 | 2.38E+08 | T    | -    | UTR3         | RYR2                        | NA                     | NA                                                                                          | NA          | NA          | NA |
| chr1 | 2.4E+08  | 2.4E+08  | GGC  | -    | exonic       | FMN2                        | nonframeshift deletion | FMN2:NM_020066:exon1:c.160_162del:p.54_54del                                                | rs140531536 | NA          | NA |
| chr1 | 2.4E+08  | 2.4E+08  | C    | A    | exonic       | FMN2                        | synonymous SNV         | FMN2:NM_020066:exon1:c.C1413A:p.A471A                                                       | NA          | rs10926124  | NA |
| chr1 | 2.4E+08  | 2.4E+08  | G    | A    | exonic       | FMN2                        | synonymous SNV         | FMN2:NM_020066:exon5:c.G2820A:p.A940A                                                       | NA          | rs145628188 | NA |
| chr1 | 2.43E+08 | 2.43E+08 | A    | G    | ncRNA_exonic | LOC731275                   | NA                     | NA                                                                                          | NA          | rs148698597 | NA |
| chr1 | 2.45E+08 | 2.45E+08 | -    | GTA  | UTR3         | C1orf101                    | NA                     | NA                                                                                          | NA          | rs201380603 | NA |
| chr1 | 2.48E+08 | 2.48E+08 | -    | A    | UTR3         | TRIM58                      | NA                     | NA                                                                                          | NA          | rs34769974  | NA |
| chr1 | 2.48E+08 | 2.48E+08 | G    | A    | exonic       | OR2T8                       | synonymous SNV         | OR2T8:NM_001005522:exon1:c.G435A:p.S145S                                                    | rs192581532 | NA          | NA |
| chr1 | 2.48E+08 | 2.48E+08 | G    | C    | exonic       | OR2T8                       | nonsynonymous SNV      | OR2T8:NM_001005522:exon1:c.G437C:p.C146S                                                    | NA          | rs146023264 | B  |
| chr1 | 2.48E+08 | 2.48E+08 | T    | C    | exonic       | OR2T8                       | synonymous SNV         | OR2T8:NM_001005522:exon1:c.T438C:p.C146C                                                    | NA          | rs142841709 | NA |
| chr1 | 2.49E+08 | 2.49E+08 | C    | T    | exonic       | OR2T3                       | synonymous SNV         | OR2T3:NM_001005495:exon1:c.C711T:p.A237A                                                    | NA          | rs77686526  | NA |
| chr1 | 2.49E+08 | 2.49E+08 | A    | G    | exonic       | OR2T3                       | nonsynonymous SNV      | OR2T3:NM_001005495:exon1:c.A829G:p.M277V                                                    | NA          | rs74498773  | P  |
| chr1 | 2.49E+08 | 2.49E+08 | A    | T    | exonic       | OR2T7                       | nonsynonymous SNV      | OR2T7:NM_001001824:exon1:c.T401A:p.V134D                                                    | NA          | rs1782240   | B  |
| chr2 | 905581   | 905581   | C    | T    | intergenic   | 822(dist=41469),SNTG2(dist= | NA                     | NA                                                                                          | NA          | rs113738897 | NA |
| chr2 | 905693   | 905693   | T    | G    | intergenic   | 822(dist=41581),SNTG2(dist= | NA                     | NA                                                                                          | NA          | rs74861779  | NA |
| chr2 | 1636938  | 1636938  | -    | T    | UTR3         | PXDN                        | NA                     | NA                                                                                          | NA          | NA          | NA |
| chr2 | 9546208  | 9546208  | G    | A    | UTR3         | ITGB1BP1                    | NA                     | NA                                                                                          | NA          | rs112888538 | NA |
| chr2 | 9546440  | 9546440  | T    | G    | UTR3         | ITGB1BP1                    | NA                     | NA                                                                                          | NA          | rs13392033  | NA |
| chr2 | 11782595 | 11782595 | C    | A    | UTR3         | GREB1                       | NA                     | NA                                                                                          | NA          | NA          | NA |
| chr2 | 24253007 | 24253007 | -    | A    | UTR3         | C2orf44                     | NA                     | NA                                                                                          | NA          | NA          | NA |
| chr2 | 24533411 | 24533411 | G    | T    | exonic       | ITSN2                       | nonsynonymous SNV      | 3A:p.P168Q,ITSN2:NM_019595:exon6:c.C503A:p.P168Q,ITSN2:NM_1                                 | NA          | NA          | NA |
| chr2 | 24991386 | 24991388 | AAA  | -    | UTR3         | NCOA1                       | NA                     | NA                                                                                          | NA          | NA          | NA |
| chr2 | 25379159 | 25379159 | G    | T    | UTR3         | EFR3B                       | NA                     | NA                                                                                          | NA          | NA          | NA |
| chr2 | 26455127 | 26455127 | G    | A    | exonic       | HADHA                       | synonymous SNV         | HADHA:NM_000182:exon6:c.C474T:p.Y158Y                                                       | NA          | rs11552518  | NA |
| chr2 | 26680509 | 26680509 | A    | T    | UTR3         | OTOF                        | NA                     | NA                                                                                          | NA          | NA          | NA |
| chr2 | 27477627 | 27477627 | -    | ACAC | UTR3         | SLC30A3                     | NA                     | NA                                                                                          | NA          | NA          | NA |
| chr2 | 27804714 | 27804714 | T    | C    | exonic       | C2orf16                     | nonsynonymous SNV      | C2orf16:NM_032266:exon1:c.T5275C:p.C1759R                                                   | NA          | NA          | NA |
| chr2 | 27804738 | 27804738 | T    | C    | exonic       | C2orf16                     | nonsynonymous SNV      | C2orf16:NM_032266:exon1:c.T5299C:p.C1767R                                                   | NA          | rs199708546 | NA |
| chr2 | 29023081 | 29023081 | C    | T    | UTR3         | PPP1CB                      | NA                     | NA                                                                                          | NA          | NA          | NA |
| chr2 | 29023088 | 29023088 | C    | T    | UTR3         | PPP1CB                      | NA                     | NA                                                                                          | NA          | NA          | NA |
| chr2 | 29023092 | 29023092 | C    | T    | UTR3         | PPP1CB                      | NA                     | NA                                                                                          | NA          | rs201829322 | NA |
| chr2 | 29170759 | 29170759 | G    | A    | UTR3         | WDR43                       | NA                     | NA                                                                                          | NA          | rs13397658  | NA |
| chr2 | 29448423 | 29448423 | T    | G    | exonic       | ALK                         | nonsynonymous SNV      | ALK:NM_004304:exon19:c.A3076C:p.T1026P                                                      | NA          | NA          | B  |
| chr2 | 30670215 | 30670215 | A    | C    | UTR5         | LCLAT1                      | NA                     | NA                                                                                          | NA          | NA          | NA |
| chr2 | 30864771 | 30864774 | TTTC | -    | UTR3         | LCLAT1                      | NA                     | NA                                                                                          | NA          | NA          | NA |
| chr2 | 30865285 | 30865286 | TA   | -    | UTR3         | LCLAT1                      | NA                     | NA                                                                                          | NA          | NA          | NA |
| chr2 | 32822957 | 32822957 | G    | A    | exonic       | BIRC6                       | synonymous SNV         | BIRC6:NM_016252:exon69:c.G13752A:p.T4584T                                                   | rs2710625   | NA          | NA |
| chr2 | 33787988 | 33787988 | A    | T    | UTR3         | RASGRP3                     | NA                     | NA                                                                                          | NA          | NA          | NA |
| chr2 | 33787989 | 33787989 | C    | G    | UTR3         | RASGRP3                     | NA                     | NA                                                                                          | NA          | NA          | NA |
| chr2 | 33787990 | 33787990 | T    | A    | UTR3         | RASGRP3                     | NA                     | NA                                                                                          | NA          | NA          | NA |
| chr2 | 33951323 | 33951323 | G    | T    | ncRNA_exonic | MYADML                      | NA                     | NA                                                                                          | NA          | NA          | NA |
| chr2 | 36782886 | 36782886 | G    | A    | exonic       | FEZ2                        | nonsynonymous SNV      | _005102:exon7:c.C985T:p.R329C,FEZ2:NM_001042548:exon8:c.C1066                               | NA          | rs848642    | NA |
| chr2 | 36810586 | 36810586 | T    | C    | exonic       | FEZ2                        | synonymous SNV         | _001042548:exon3:c.A402G:p.T134T,FEZ2:NM_005102:exon3:c.A402C                               | NA          | rs14291     | NA |
| chr2 | 37479024 | 37479024 | A    | -    | UTR3         | PRKD3                       | NA                     | NA                                                                                          | NA          | NA          | NA |
| chr2 | 37871117 | 37871120 | TTTT | -    | UTR3         | CDC42EP3                    | NA                     | NA                                                                                          | NA          | rs200620123 | NA |
| chr2 | 42515437 | 42515437 | A    | G    | exonic       | EML4                        | nonsynonymous SNV      | 1145076:exon10:c.A1019G:p.K340R,EML4:NM_019063:exon11:c.A11                                 | NA          | rs28651764  | B  |
| chr2 | 42557760 | 42557760 | T    | -    | UTR3         | EML4                        | NA                     | NA                                                                                          | NA          | NA          | NA |
| chr2 | 43452183 | 43452183 | A    | G    | exonic       | ZFP36L2                     | synonymous SNV         | ZFP36L2:NM_006887:exon2:c.T760C:p.L254L                                                     | NA          | rs7933      | NA |
| chr2 | 45172485 | 45172485 | G    | A    | UTR3         | SIX3                        | NA                     | NA                                                                                          | NA          | rs60528008  | NA |
| chr2 | 46707884 | 46707884 | A    | G    | exonic       | TMEM247                     | nonsynonymous SNV      | TMEM247:NM_001145051:exon2:c.A458G:p.Q153R                                                  | NA          | rs201742486 | NA |
| chr2 | 46844219 | 46844219 | -    | G    | UTR5         | PIGF                        | NA                     | NA                                                                                          | NA          | rs5830914   | NA |



|      |          |          |           |           |              |                             |                   |                                                             |                                    |             |    |
|------|----------|----------|-----------|-----------|--------------|-----------------------------|-------------------|-------------------------------------------------------------|------------------------------------|-------------|----|
| chr2 | 46852206 | 46852206 | G         | T         | UTR3         | CRIP1                       | NA                | NA                                                          | NA                                 | NA          | NA |
| chr2 | 48742355 | 48742355 | -         | TCTCTCTCT | UTR3         | PPP1R21                     | NA                | NA                                                          | NA                                 | NA          | NA |
| chr2 | 50147836 | 50147841 | GTGTGT    | -         | UTR3         | NRXN1                       | NA                | NA                                                          | NA                                 | NA          | NA |
| chr2 | 51259649 | 51259660 | AGAGAGAC  | -         | UTR5         | NRXN1                       | NA                | NA                                                          | NA                                 | NA          | NA |
| chr2 | 61351187 | 61351187 | T         | C         | UTR3         | KIAA1841                    | NA                | NA                                                          | NA                                 | rs114498878 | NA |
| chr2 | 61351188 | 61351188 | T         | C         | UTR3         | KIAA1841                    | NA                | NA                                                          | NA                                 | rs114317312 | NA |
| chr2 | 61351189 | 61351189 | T         | A         | UTR3         | KIAA1841                    | NA                | NA                                                          | NA                                 | rs114015142 | NA |
| chr2 | 85284303 | 85284303 | A         | -         | UTR3         | KCMF1                       | NA                | NA                                                          | NA                                 | NA          | NA |
| chr2 | 85531102 | 85531102 | T         | C         | exonic       | TCF7L1                      | nonsynonymous SNV | TCF7L1:NM_031283:exon6:c.T743C:p.L248P                      | NA                                 | NA          | D  |
| chr2 | 85531118 | 85531118 | A         | C         | exonic       | TCF7L1                      | synonymous SNV    | TCF7L1:NM_031283:exon6:c.A759C:p.P253P                      | NA                                 | NA          | NA |
| chr2 | 85549667 | 85549667 | G         | C         | UTR3         | TGOLN2                      | NA                | NA                                                          | NA                                 | NA          | NA |
| chr2 | 85554315 | 85554315 | A         | G         | exonic       | TGOLN2                      | synonymous SNV    | TC:p.N180N,TGOLN2:NM_001206844:exon2:c.T540C:p.N180N,TGOLN2 | NA                                 | NA          | NA |
| chr2 | 87002452 | 87002453 | TT        | -         | UTR3         | RMND5A                      | NA                | NA                                                          | NA                                 | NA          | NA |
| chr2 | 89082373 | 89082373 | G         | A         | ncRNA_exonic | ANKRD36BP2                  | NA                | NA                                                          | NA                                 | rs140000456 | NA |
| chr2 | 89082379 | 89082379 | G         | A         | ncRNA_exonic | ANKRD36BP2                  | NA                | NA                                                          | NA                                 | rs143191250 | NA |
| chr2 | 89082381 | 89082381 | C         | T         | ncRNA_exonic | ANKRD36BP2                  | NA                | NA                                                          | NA                                 | rs140822233 | NA |
| chr2 | 89082388 | 89082388 | G         | T         | ncRNA_exonic | ANKRD36BP2                  | NA                | NA                                                          | NA                                 | rs142861467 | NA |
| chr2 | 89104333 | 89104333 | C         | T         | ncRNA_exonic | ANKRD36BP2                  | NA                | NA                                                          | NA                                 | rs148665042 | NA |
| chr2 | 89104362 | 89104362 | C         | T         | ncRNA_exonic | ANKRD36BP2                  | NA                | NA                                                          | NA                                 | rs62158694  | NA |
| chr2 | 91963374 | 91963374 | A         | G         | ncRNA_exonic | GGT8P                       | NA                | NA                                                          | NA                                 | NA          | NA |
| chr2 | 91963419 | 91963419 | A         | G         | ncRNA_exonic | GGT8P                       | NA                | NA                                                          | NA                                 | NA          | NA |
| chr2 | 91963455 | 91963455 | T         | C         | ncRNA_exonic | GGT8P                       | NA                | NA                                                          | NA                                 | NA          | NA |
| chr2 | 91963687 | 91963687 | G         | A         | ncRNA_exonic | GGT8P                       | NA                | NA                                                          | NA                                 | rs201619433 | NA |
| chr2 | 91968630 | 91968630 | T         | C         | ncRNA_exonic | GGT8P                       | NA                | NA                                                          | NA                                 | NA          | NA |
| chr2 | 91969892 | 91969892 | C         | T         | ncRNA_exonic | GGT8P                       | NA                | NA                                                          | NA                                 | rs5993271   | NA |
| chr2 | 91969935 | 91969935 | T         | C         | ncRNA_exonic | GGT8P                       | NA                | NA                                                          | NA                                 | rs4059987   | NA |
| chr2 | 92129578 | 92129578 | G         | C         | ncRNA_exonic | ACTR3BP2                    | NA                | NA                                                          | NA                                 | rs4125437   | NA |
| chr2 | 92129614 | 92129614 | G         | T         | ncRNA_exonic | ACTR3BP2                    | NA                | NA                                                          | NA                                 | NA          | NA |
| chr2 | 95537245 | 95537245 | C         | G         | ncRNA_UTR5   | TEKT4                       | NA                | NA                                                          | NA                                 | rs4854234   | NA |
| chr2 | 97779341 | 97779341 | T         | G         | UTR5         | ANKRD36                     | NA                | NA                                                          | NA                                 | rs3866777   | NA |
| chr2 | 97911395 | 97911395 | A         | G         | exonic       | ANKRD36                     | nonsynonymous SNV | ANKRD36:NM_001164315:exon71:c.A5071G:p.K1691E               | NA                                 | rs2595354   | NA |
| chr2 | 98127671 | 98127671 | A         | C         | exonic       | ANKRD36B                    | nonsynonymous SNV | ANKRD36B:NM_025190:exon39:c.T3650G:p.M1217R                 | NA                                 | rs76066788  | NA |
| chr2 | 98128228 | 98128228 | G         | A         | exonic       | ANKRD36B                    | synonymous SNV    | ANKRD36B:NM_025190:exon39:c.C3093T:p.S1031S                 | ID=COSN395741;OCCURENCE=1(lung)    | rs201190268 | NA |
| chr2 | 98129733 | 98129733 | A         | C         | exonic       | ANKRD36B                    | stopgain SNV      | ANKRD36B:NM_025190:exon38:c.T2715G:p.Y905X                  | NA                                 | rs145533718 | NA |
| chr2 | 1.01E+08 | 1.01E+08 | AAAAATTA  | -         | UTR3         | LONRF2                      | NA                | NA                                                          | NA                                 | NA          | NA |
| chr2 | 1.01E+08 | 1.01E+08 | TCTACTGAA | -         | UTR3         | LONRF2                      | NA                | NA                                                          | NA                                 | NA          | NA |
| chr2 | 1.03E+08 | 1.03E+08 | G         | A         | UTR3         | MAP4K4                      | NA                | NA                                                          | NA                                 | NA          | NA |
| chr2 | 1.07E+08 | 1.07E+08 | AAC       | -         | UTR3         | ST6GAL2                     | NA                | NA                                                          | NA                                 | rs140467729 | NA |
| chr2 | 1.07E+08 | 1.07E+08 | -         | A         | UTR3         | ST6GAL2                     | NA                | NA                                                          | NA                                 | NA          | NA |
| chr2 | 1.09E+08 | 1.09E+08 | T         | C         | exonic       | SULT1C3                     | nonsynonymous SNV | SULT1C3:NM_001008743:exon5:c.T581C:p.M194T                  | NA                                 | rs6722745   | B  |
| chr2 | 1.09E+08 | 1.09E+08 | G         | A         | exonic       | CCDC138                     | nonsynonymous SNV | CCDC138:NM_144978:exon4:c.G344A:p.R115K                     | rs=COSM148924;OCCURENCE=1(stomach) | rs6740879   | B  |
| chr2 | 1.13E+08 | 1.13E+08 | G         | T         | UTR3         | ZC3H6                       | NA                | NA                                                          | NA                                 | NA          | NA |
| chr2 | 1.14E+08 | 1.14E+08 | T         | C         | exonic       | FOXD4L1                     | nonsynonymous SNV | FOXD4L1:NM_012184:exon1:c.T422C:p.F141S                     | NA                                 | NA          | D  |
| chr2 | 1.14E+08 | 1.14E+08 | A         | C         | exonic       | FOXD4L1                     | nonsynonymous SNV | FOXD4L1:NM_012184:exon1:c.A431C:p.Y144S                     | NA                                 | NA          | D  |
| chr2 | 1.14E+08 | 1.14E+08 | A         | C         | ncRNA_exonic | FAM138B                     | NA                | NA                                                          | NA                                 | rs141773324 | NA |
| chr2 | 1.14E+08 | 1.14E+08 | T         | C         | UTR5         | RABL2A                      | NA                | NA                                                          | NA                                 | rs1667097   | NA |
| chr2 | 1.19E+08 | 1.19E+08 | A         | -         | UTR3         | CCDC93                      | NA                | NA                                                          | NA                                 | NA          | NA |
| chr2 | 1.19E+08 | 1.19E+08 | A         | -         | UTR3         | CCDC93                      | NA                | NA                                                          | NA                                 | rs3832171   | NA |
| chr2 | 1.22E+08 | 1.22E+08 | A         | -         | UTR3         | TFCP2L1                     | NA                | NA                                                          | NA                                 | rs36110149  | NA |
| chr2 | 1.22E+08 | 1.22E+08 | -         | TTG       | UTR3         | CLASP1                      | NA                | NA                                                          | NA                                 | rs113839646 | NA |
| chr2 | 1.28E+08 | 1.28E+08 | C         | T         | UTR3         | CYP27C1                     | NA                | NA                                                          | NA                                 | rs35887875  | NA |
| chr2 | 1.28E+08 | 1.28E+08 | T         | -         | UTR3         | MAP3K2                      | NA                | NA                                                          | NA                                 | NA          | NA |
| chr2 | 1.29E+08 | 1.29E+08 | A         | C         | UTR3         | UGGT1                       | NA                | NA                                                          | NA                                 | NA          | NA |
| chr2 | 1.31E+08 | 1.31E+08 | -         | G         | ncRNA_exonic | LOC440905                   | NA                | NA                                                          | NA                                 | rs34985062  | NA |
| chr2 | 1.31E+08 | 1.31E+08 | -         | CT        | ncRNA_exonic | LOC440905                   | NA                | NA                                                          | NA                                 | rs3058424   | NA |
| chr2 | 1.31E+08 | 1.31E+08 | G         | A         | exonic       | POTEF                       | synonymous SNV    | POTEF:NM_001099771:exon17:c.C2172T:p.D724D                  | NA                                 | rs201958629 | NA |
| chr2 | 1.31E+08 | 1.31E+08 | T         | C         | exonic       | CCDC74B                     | nonsynonymous SNV | CCDC74B:NM_207310:exon3:c.A446G:p.H149R                     | NA                                 | rs138331089 | NA |
| chr2 | 1.33E+08 | 1.33E+08 | G         | A         | exonic       | C2orf27B                    | synonymous SNV    | C2orf27B:NM_214461:exon3:c.C189T:p.A63A                     | NA                                 | rs71430413  | NA |
| chr2 | 1.33E+08 | 1.33E+08 | G         | A         | ncRNA_exonic | ANKRD30BL                   | NA                | NA                                                          | NA                                 | rs112315337 | NA |
| chr2 | 1.33E+08 | 1.33E+08 | G         | A         | ncRNA_exonic | ANKRD30BL                   | NA                | NA                                                          | NA                                 | rs111401445 | NA |
| chr2 | 1.33E+08 | 1.33E+08 | G         | C         | ncRNA_exonic | ANKRD30BL                   | NA                | NA                                                          | NA                                 | rs112494139 | NA |
| chr2 | 1.33E+08 | 1.33E+08 | G         | A         | ncRNA_exonic | ANKRD30BL                   | NA                | NA                                                          | NA                                 | rs148180857 | NA |
| chr2 | 1.45E+08 | 1.45E+08 | T         | -         | intergenic   | P15(dist=176565),GTDC1(dist | NA                | NA                                                          | NA                                 | rs61418485  | NA |
| chr2 | 1.52E+08 | 1.52E+08 | -         | T         | UTR5         | RBM43                       | NA                | NA                                                          | NA                                 | rs113906824 | NA |
| chr2 | 1.52E+08 | 1.52E+08 | G         | A         | exonic       | NMI                         | nonsynonymous SNV | NMI:NM_004688:exon2:c.C47T:p.S16L                           | NA                                 | rs1048135   | B  |
| chr2 | 1.53E+08 | 1.53E+08 | C         | T         | UTR3         | CACNB4                      | NA                | NA                                                          | NA                                 | rs7597215   | NA |

|      |          |          |           |           |              |                           |                        |                                                                                                                             |    |             |    |
|------|----------|----------|-----------|-----------|--------------|---------------------------|------------------------|-----------------------------------------------------------------------------------------------------------------------------|----|-------------|----|
| chr2 | 1.53E+08 | 1.53E+08 | A         | -         | UTR3         | STAM2                     | NA                     | NA                                                                                                                          | NA | rs58778946  | NA |
| chr2 | 1.61E+08 | 1.61E+08 | A         | G         | exonic       | LY75,LY75-CD302           | nonsynonymous SNV      | C:p.Y1391H,LY75-CD302:NM_001198760:exon30:c.T4171C:p.Y1391H,rs127:c.3613_3633del;p.1205_1211del,GIGYF2:NM_001103147:exon29: | NA | rs2059696   | D  |
| chr2 | 1.61E+08 | 1.61E+08 | -         | T         | UTR3         | RBMS1                     | NA                     | NA                                                                                                                          | NA | rs34176400  | NA |
| chr2 | 1.67E+08 | 1.67E+08 | A         | G         | exonic       | SCN9A                     | synonymous SNV         | SCN9A:NM_002977:exon10:c.T1119C:p.A373A                                                                                     | NA | rs13414203  | NA |
| chr2 | 1.7E+08  | 1.7E+08  | -         | A         | UTR3         | LRP2                      | NA                     | NA                                                                                                                          | NA | NA          | NA |
| chr2 | 1.7E+08  | 1.7E+08  | T         | C         | UTR3         | BBS5                      | NA                     | NA                                                                                                                          | NA | rs7589199   | NA |
| chr2 | 1.74E+08 | 1.74E+08 | -         | A         | ncRNA_UTR3   | ZAK                       | NA                     | NA                                                                                                                          | NA | NA          | NA |
| chr2 | 1.77E+08 | 1.77E+08 | G         | A         | UTR3         | KIAA1715                  | NA                     | NA                                                                                                                          | NA | NA          | NA |
| chr2 | 1.77E+08 | 1.77E+08 | C         | T         | UTR3         | HOXD9                     | NA                     | NA                                                                                                                          | NA | NA          | NA |
| chr2 | 1.78E+08 | 1.78E+08 | TT        | -         | UTR3         | PDE11A                    | NA                     | NA                                                                                                                          | NA | NA          | NA |
| chr2 | 1.78E+08 | 1.78E+08 | C         | T         | UTR3         | PDE11A                    | NA                     | NA                                                                                                                          | NA | NA          | NA |
| chr2 | 1.78E+08 | 1.78E+08 | AGTCTGG   | -         | UTR3         | PDE11A                    | NA                     | NA                                                                                                                          | NA | NA          | NA |
| chr2 | 1.79E+08 | 1.79E+08 | C         | -         | splicing     | >-,NM_001139518:exon8:c.5 | NA                     | NA                                                                                                                          | NA | NA          | NA |
| chr2 | 1.83E+08 | 1.83E+08 | A         | C         | UTR3         | PDE1A                     | NA                     | NA                                                                                                                          | NA | rs1999      | NA |
| chr2 | 1.89E+08 | 1.89E+08 | A         | -         | UTR3         | GULP1                     | NA                     | NA                                                                                                                          | NA | rs5837097   | NA |
| chr2 | 1.92E+08 | 1.92E+08 | C         | A         | UTR5         | NAB1                      | NA                     | NA                                                                                                                          | NA | rs2293765   | NA |
| chr2 | 1.97E+08 | 1.97E+08 | T         | -         | UTR3         | SLC39A10                  | NA                     | NA                                                                                                                          | NA | rs66775415  | NA |
| chr2 | 1.98E+08 | 1.98E+08 | G         | A         | UTR3         | PGAP1                     | NA                     | NA                                                                                                                          | NA | NA          | NA |
| chr2 | 2.02E+08 | 2.02E+08 | -         | TTAA      | UTR3         | PPIL3                     | NA                     | NA                                                                                                                          | NA | rs145843683 | NA |
| chr2 | 2.02E+08 | 2.02E+08 | TT        | -         | UTR3         | FAM126B                   | NA                     | NA                                                                                                                          | NA | NA          | NA |
| chr2 | 2.04E+08 | 2.04E+08 | C         | T         | UTR3         | FAM117B                   | NA                     | NA                                                                                                                          | NA | NA          | NA |
| chr2 | 2.04E+08 | 2.04E+08 | TT        | -         | UTR3         | FAM117B                   | NA                     | NA                                                                                                                          | NA | NA          | NA |
| chr2 | 2.04E+08 | 2.04E+08 | T         | C         | UTR3         | WDR12                     | NA                     | NA                                                                                                                          | NA | rs6722332   | NA |
| chr2 | 2.04E+08 | 2.04E+08 | A         | C         | UTR3         | RAPH1                     | NA                     | NA                                                                                                                          | NA | rs201945070 | NA |
| chr2 | 2.07E+08 | 2.07E+08 | A         | -         | UTR3         | INO80D                    | NA                     | NA                                                                                                                          | NA | rs11306784  | NA |
| chr2 | 2.07E+08 | 2.07E+08 | AA        | -         | UTR3         | INO80D                    | NA                     | NA                                                                                                                          | NA | rs143392413 | NA |
| chr2 | 2.09E+08 | 2.09E+08 | AG        | -         | UTR3         | FZD5                      | NA                     | NA                                                                                                                          | NA | rs201847302 | NA |
| chr2 | 2.09E+08 | 2.09E+08 | T         | -         | UTR3         | PLEKHM3                   | NA                     | NA                                                                                                                          | NA | NA          | NA |
| chr2 | 2.11E+08 | 2.11E+08 | CACA      | -         | UTR3         | MAP2                      | NA                     | NA                                                                                                                          | NA | rs112861196 | NA |
| chr2 | 2.18E+08 | 2.18E+08 | -         | CTGT      | ncRNA_exonic | DIRC3                     | NA                     | NA                                                                                                                          | NA | rs112187824 | NA |
| chr2 | 2.19E+08 | 2.19E+08 | -         | C         | UTR3         | SLC11A1                   | NA                     | NA                                                                                                                          | NA | NA          | NA |
| chr2 | 2.2E+08  | 2.2E+08  | G         | T         | UTR3         | FAM134A                   | NA                     | NA                                                                                                                          | NA | NA          | NA |
| chr2 | 2.2E+08  | 2.2E+08  | G         | T         | UTR3         | FAM134A                   | NA                     | NA                                                                                                                          | NA | rs146041546 | NA |
| chr2 | 2.24E+08 | 2.24E+08 | C         | A         | UTR3         | ACSL3                     | NA                     | NA                                                                                                                          | NA | rs1071621   | NA |
| chr2 | 2.25E+08 | 2.25E+08 | C         | A         | UTR3         | WDFY1                     | NA                     | NA                                                                                                                          | NA | NA          | NA |
| chr2 | 2.33E+08 | 2.33E+08 | T         | C         | UTR5         | PTMA                      | NA                     | NA                                                                                                                          | NA | rs12415     | NA |
| chr2 | 2.33E+08 | 2.33E+08 | C         | T         | UTR5         | PTMA                      | NA                     | NA                                                                                                                          | NA | rs8868      | NA |
| chr2 | 2.33E+08 | 2.33E+08 | T         | C         | UTR3         | DIS3L2                    | NA                     | NA                                                                                                                          | NA | NA          | NA |
| chr2 | 2.34E+08 | 2.34E+08 | A         | G         | exonic       | EFHD1                     | nonsynonymous SNV      | _001243252:exon3:c.A269G:p.K90R,EFHD1:NM_025202:exon3:c.A557                                                                | NA | rs11550699  | B  |
| chr2 | 2.34E+08 | 2.34E+08 | CAGCAGCTC | -         | exonic       | GIGYF2                    | nonframeshift deletion | 127:c.3613_3633del;p.1205_1211del,GIGYF2:NM_001103147:exon29:                                                               | NA | NA          | NA |
| chr2 | 2.41E+08 | 2.41E+08 | C         | T         | exonic       | PRR21                     | synonymous SNV         | PRR21:NM_001080835:exon1:c.G768A:p.S256S                                                                                    | NA | NA          | NA |
| chr2 | 2.41E+08 | 2.41E+08 | G         | C         | exonic       | PRR21                     | nonsynonymous SNV      | PRR21:NM_001080835:exon1:c.C271G:p.P91A                                                                                     | NA | rs112308001 | P  |
| chr2 | 2.41E+08 | 2.41E+08 | A         | G         | exonic       | PRR21                     | synonymous SNV         | PRR21:NM_001080835:exon1:c.T237C:p.H79H                                                                                     | NA | rs117846189 | NA |
| chr2 | 2.41E+08 | 2.41E+08 | G         | A         | exonic       | PRR21                     | nonsynonymous SNV      | PRR21:NM_001080835:exon1:c.C209T:p.T70I                                                                                     | NA | rs150205960 | P  |
| chr2 | 2.42E+08 | 2.42E+08 | T         | C         | exonic       | FARP2                     | synonymous SNV         | FARP2:NM_014808:exon23:c.T2586C:p.P862P                                                                                     | NA | NA          | NA |
| chr2 | 2.42E+08 | 2.42E+08 | A         | C         | exonic       | FARP2                     | synonymous SNV         | FARP2:NM_014808:exon23:c.A2623C:p.R875R                                                                                     | NA | NA          | NA |
| chr2 | 2.43E+08 | 2.43E+08 | T         | A         | UTR3         | BOK                       | NA                     | NA                                                                                                                          | NA | rs12619342  | NA |
| chr2 | 2.43E+08 | 2.43E+08 | C         | A         | UTR3         | D2HGDH                    | NA                     | NA                                                                                                                          | NA | NA          | NA |
| chr2 | 2.43E+08 | 2.43E+08 | G         | A         | exonic       | CXXC11                    | nonsynonymous SNV      | CXXC11:NM_173821:exon2:c.G302A:p.G101E                                                                                      | NA | rs7420371   | D  |
| chr3 | 3190646  | 3190646  | -         | TCTCTAAAC | UTR3         | TRNT1                     | NA                     | NA                                                                                                                          | NA | rs141431257 | NA |
| chr3 | 3214495  | 3214495  | C         | A         | exonic       | CRBN                      | nonsynonymous SNV      | _001173482:exon4:c.G489T:p.R163S,CRBN:NM_016302:exon4:c.G492                                                                | NA | NA          | D  |
| chr3 | 11599950 | 11599950 | T         | -         | UTR3         | VGLL4                     | NA                     | NA                                                                                                                          | NA | NA          | NA |
| chr3 | 14105938 | 14105938 | T         | A         | ncRNA_exonic | TPRXL                     | NA                     | NA                                                                                                                          | NA | NA          | NA |
| chr3 | 14105955 | 14105955 | T         | C         | ncRNA_exonic | TPRXL                     | NA                     | NA                                                                                                                          | NA | NA          | NA |
| chr3 | 14105996 | 14105996 | A         | G         | ncRNA_exonic | TPRXL                     | NA                     | NA                                                                                                                          | NA | NA          | NA |
| chr3 | 14106174 | 14106174 | T         | C         | ncRNA_exonic | TPRXL                     | NA                     | NA                                                                                                                          | NA | NA          | NA |
| chr3 | 14200047 | 14200047 | C         | A         | exonic       | XPC                       | stopgain SNV           | 001145769:exon9:c.G1225T:p.E409X,XPC:NM_004628:exon9:c.G1336                                                                | NA | NA          | NA |
| chr3 | 15090909 | 15090914 | CCTTAG    | -         | UTR3         | MRPS25                    | NA                     | NA                                                                                                                          | NA | rs148431054 | NA |
| chr3 | 15451978 | 15451978 | T         | C         | UTR3         | METTL6                    | NA                     | NA                                                                                                                          | NA | rs6805196   | NA |
| chr3 | 15469025 | 15469025 | A         | C         | UTR5         | METTL6                    | NA                     | NA                                                                                                                          | NA | NA          | NA |
| chr3 | 15482997 | 15482999 | TTT       | -         | UTR3         | EAF1                      | NA                     | NA                                                                                                                          | NA | NA          | NA |
| chr3 | 21448176 | 21448180 | AAAAA     | -         | ncRNA_exonic | VENTXP7                   | NA                     | NA                                                                                                                          | NA | NA          | NA |
| chr3 | 28364846 | 28364846 | T         | -         | UTR3         | AZI2                      | NA                     | NA                                                                                                                          | NA | rs200293551 | NA |
| chr3 | 30045699 | 30045699 | -         | T         | UTR3         | RBMS3                     | NA                     | NA                                                                                                                          | NA | NA          | NA |
| chr3 | 38888227 | 38888227 | C         | T         | exonic       | SCN11A                    | synonymous SNV         | SCN11A:NM_014139:exon26:c.G5334A:p.L1778L                                                                                   | NA | rs4640498   | NA |
| chr3 | 39137879 | 39137879 | -         | A         | UTR3         | WDR48                     | NA                     | NA                                                                                                                          | NA | rs11413912  | NA |

|      |          |          |    |            |              |              |                   |                                                                                                           |                                 |             |    |
|------|----------|----------|----|------------|--------------|--------------|-------------------|-----------------------------------------------------------------------------------------------------------|---------------------------------|-------------|----|
| chr3 | 40498933 | 40498933 | A  | G          | UTR5         | RPL14        | NA                | NA                                                                                                        | NA                              | rs4973904   | NA |
| chr3 | 41281477 | 41281477 | C  | T          | UTR3         | CTNNA1       | NA                | NA                                                                                                        | NA                              | rs201175238 | NA |
| chr3 | 42825568 | 42825568 | A  | -          | UTR3         | HIGD1A       | NA                | NA                                                                                                        | NA                              | rs5848628   | NA |
| chr3 | 44607013 | 44607013 | T  | C          | exonic       | ZKSCAN7      | nonsynonymous SNV | M_018651:exon3:c.T458C:p.F153S,ZKSCAN7:NM_025169:exon3:c.T45                                              | NA                              | rs13081859  | B  |
| chr3 | 44964485 | 44964485 | C  | G          | UTR3         | ZDHC3        | NA                | NA                                                                                                        | NA                              | rs1979946   | NA |
| chr3 | 45960561 | 45960561 | -  | AA         | UTR3         | FYCO1        | NA                | NA                                                                                                        | NA                              | rs145514188 | NA |
| chr3 | 47050997 | 47050997 | T  | C          | UTR3         | NBEAL2       | NA                | NA                                                                                                        | NA                              | NA          | NA |
| chr3 | 47050999 | 47050999 | G  | C          | UTR3         | NBEAL2       | NA                | NA                                                                                                        | NA                              | NA          | NA |
| chr3 | 48451952 | 48451952 | A  | C          | exonic       | PLXNB1       | nonsynonymous SNV | 1130082:exon30:c.T5432G:p.V1811G,PLXNB1:NM_002673:exon30:c.T5432G:p.V1811G;COSM328123;OCCURENCE=1(pancrea | NA                              | NA          | P  |
| chr3 | 49044650 | 49044650 | A  | G          | UTR5         | WDR6         | NA                | NA                                                                                                        | NA                              | NA          | NA |
| chr3 | 49572947 | 49572947 | C  | A          | UTR3         | DAG1         | NA                | NA                                                                                                        | NA                              | NA          | NA |
| chr3 | 49694888 | 49694888 | T  | C          | exonic       | BSN          | synonymous SNV    | BSN:NM_003458:exon5:c.T7899C:p.L2633L                                                                     | NA                              | NA          | NA |
| chr3 | 49726070 | 49726070 | G  | A          | exonic       | MST1         | nonsynonymous SNV | MST1:NM_020998:exon1:c.C55T:p.P19S                                                                        | NA                              | rs62262686  | D  |
| chr3 | 51738256 | 51738256 | A  | G          | UTR3         | TEX264       | NA                | NA                                                                                                        | NA                              | rs4067      | NA |
| chr3 | 52015205 | 52015205 | C  | A          | ncRNA_UTR3   | ABHD14A      | NA                | NA                                                                                                        | NA                              | NA          | NA |
| chr3 | 55502167 | 55502167 | A  | -          | UTR3         | WNT5A        | NA                | NA                                                                                                        | NA                              | NA          | NA |
| chr3 | 64084148 | 64084148 | A  | -          | ncRNA_exonic | PRICKLE2-AS1 | NA                | NA                                                                                                        | NA                              | rs35195442  | NA |
| chr3 | 64672461 | 64672461 | T  | G          | exonic       | ADAMTS9      | nonsynonymous SNV | ADAMTS9:NM_182920:exon2:c.A299C:p.Y100S                                                                   | NA                              | NA          | D  |
| chr3 | 67049615 | 67049615 | G  | T          | exonic       | KBTBD8       | nonsynonymous SNV | KBTBD8:NM_032505:exon2:c.G227T:p.R76I                                                                     | NA                              | NA          | D  |
| chr3 | 71007273 | 71007273 | T  | -          | UTR3         | FOXP1        | NA                | NA                                                                                                        | NA                              | NA          | NA |
| chr3 | 71821711 | 71821711 | A  | -          | UTR3         | PROK2        | NA                | NA                                                                                                        | NA                              | rs71713597  | NA |
| chr3 | 75716090 | 75716090 | T  | C          | ncRNA_exonic | FLJ20518     | NA                | NA                                                                                                        | NA                              | rs144150259 | NA |
| chr3 | 75786748 | 75786748 | C  | T          | exonic       | ZNF717       | nonsynonymous SNV | ZNF717:NM_001128223:exon5:c.G2026A:p.D676N                                                                | NA                              | rs112332186 | NA |
| chr3 | 75787015 | 75787015 | C  | T          | exonic       | ZNF717       | nonsynonymous SNV | ZNF717:NM_001128223:exon5:c.G1759A:p.G587S                                                                | COSM1173002;OCCURENCE=1(oesopha | rs111576331 | NA |
| chr3 | 75787043 | 75787043 | G  | A          | exonic       | ZNF717       | synonymous SNV    | ZNF717:NM_001128223:exon5:c.C1731T:p.F577F                                                                | NA                              | rs184833776 | NA |
| chr3 | 75787116 | 75787116 | T  | G          | exonic       | ZNF717       | nonsynonymous SNV | ZNF717:NM_001128223:exon5:c.A1658C:p.H553P                                                                | NA                              | rs142824987 | NA |
| chr3 | 75787620 | 75787620 | T  | C          | exonic       | ZNF717       | nonsynonymous SNV | ZNF717:NM_001128223:exon5:c.A1154G:p.H385R                                                                | NA                              | rs145606249 | NA |
| chr3 | 75790852 | 75790852 | G  | A          | exonic       | ZNF717       | synonymous SNV    | ZNF717:NM_001128223:exon3:c.C93T:p.F31F                                                                   | NA                              | rs201689840 | NA |
| chr3 | 75790864 | 75790864 | T  | C          | exonic       | ZNF717       | synonymous SNV    | ZNF717:NM_001128223:exon3:c.A81G:p.V27V                                                                   | NA                              | rs75271400  | NA |
| chr3 | 75790870 | 75790870 | C  | T          | exonic       | ZNF717       | synonymous SNV    | ZNF717:NM_001128223:exon3:c.G75A:p.E25E                                                                   | NA                              | rs78652530  | NA |
| chr3 | 98515881 | 98515882 | AA | -          | UTR3         | DCBLD2       | NA                | NA                                                                                                        | NA                              | rs56369137  | NA |
| chr3 | 1.05E+08 | 1.05E+08 | G  | T          | exonic       | CBLB         | nonsynonymous SNV | CBLB:NM_170662:exon12:c.C1618A:p.Q540K                                                                    | NA                              | NA          | D  |
| chr3 | 1.08E+08 | 1.08E+08 | AA | -          | UTR3         | BBX          | NA                | NA                                                                                                        | NA                              | rs60360146  | NA |
| chr3 | 1.08E+08 | 1.08E+08 | A  | T          | UTR3         | BBX          | NA                | NA                                                                                                        | NA                              | rs201477170 | NA |
| chr3 | 1.12E+08 | 1.12E+08 | C  | T          | UTR5         | TAGLN3       | NA                | NA                                                                                                        | NA                              | NA          | NA |
| chr3 | 1.2E+08  | 1.2E+08  | A  | C          | exonic       | GPR156       | nonsynonymous SNV | 01168271:exon9:c.T1643G:p.V548G,GPR156:NM_153002:exon9:c.T1643G:p.V548G                                   | NA                              | NA          | D  |
| chr3 | 1.2E+08  | 1.2E+08  | A  | C          | exonic       | GPR156       | nonsynonymous SNV | 01168271:exon9:c.T1610G:p.V537G,GPR156:NM_153002:exon9:c.T1610G:p.V537G                                   | NA                              | NA          | D  |
| chr3 | 1.23E+08 | 1.23E+08 | T  | -          | ncRNA_UTR3   | MYLK         | NA                | NA                                                                                                        | NA                              | rs35930843  | NA |
| chr3 | 1.26E+08 | 1.26E+08 | -  | T          | UTR3         | ZXDC         | NA                | NA                                                                                                        | NA                              | NA          | NA |
| chr3 | 1.26E+08 | 1.26E+08 | T  | A          | UTR3         | ZXDC         | NA                | NA                                                                                                        | NA                              | rs79064850  | NA |
| chr3 | 1.29E+08 | 1.29E+08 | T  | G          | UTR3         | CNBP         | NA                | NA                                                                                                        | NA                              | NA          | NA |
| chr3 | 1.29E+08 | 1.29E+08 | T  | G          | exonic       | PLXND1       | nonsynonymous SNV | PLXND1:NM_015103:exon31:c.A5108C:p.Y1703S                                                                 | NA                              | NA          | D  |
| chr3 | 1.34E+08 | 1.34E+08 | C  | G          | UTR5         | CEP63        | NA                | NA                                                                                                        | NA                              | NA          | NA |
| chr3 | 1.39E+08 | 1.39E+08 | C  | T          | UTR3         | PRR23C       | NA                | NA                                                                                                        | NA                              | rs74940990  | NA |
| chr3 | 1.41E+08 | 1.41E+08 | -  | T          | UTR3         | RNF7         | NA                | NA                                                                                                        | NA                              | NA          | NA |
| chr3 | 1.42E+08 | 1.42E+08 | C  | T          | UTR3         | GK5          | NA                | NA                                                                                                        | NA                              | NA          | NA |
| chr3 | 1.42E+08 | 1.42E+08 | C  | T          | UTR3         | GK5          | NA                | NA                                                                                                        | NA                              | NA          | NA |
| chr3 | 1.42E+08 | 1.42E+08 | C  | T          | UTR3         | GK5          | NA                | NA                                                                                                        | NA                              | rs74651712  | NA |
| chr3 | 1.42E+08 | 1.42E+08 | G  | A          | exonic       | TRPC1        | nonsynonymous SNV | M_001251845:exon1:c.G40A:p.A14T,TRPC1:NM_003304:exon1:c.G40A:p.A14T                                       | NA                              | rs78975236  | NA |
| chr3 | 1.44E+08 | 1.44E+08 | -  | \AAAATGTTA | UTR3         | C3orf58      | NA                | NA                                                                                                        | NA                              | rs11276482  | NA |
| chr3 | 1.47E+08 | 1.47E+08 | T  | -          | UTR5         | ZIC1         | NA                | NA                                                                                                        | NA                              | rs57723801  | NA |
| chr3 | 1.5E+08  | 1.5E+08  | G  | T          | UTR3         | TSC22D2      | NA                | NA                                                                                                        | NA                              | rs201497156 | NA |
| chr3 | 1.52E+08 | 1.52E+08 | T  | -          | UTR3         | MBNL1        | NA                | NA                                                                                                        | NA                              | rs142162205 | NA |
| chr3 | 1.53E+08 | 1.53E+08 | C  | T          | UTR3         | RAP2B        | NA                | NA                                                                                                        | NA                              | NA          | NA |
| chr3 | 1.54E+08 | 1.54E+08 | C  | -          | UTR3         | ARHGAP26     | NA                | NA                                                                                                        | NA                              | NA          | NA |
| chr3 | 1.54E+08 | 1.54E+08 | TA | -          | UTR3         | DHX36        | NA                | NA                                                                                                        | NA                              | rs71790534  | NA |
| chr3 | 1.58E+08 | 1.58E+08 | A  | G          | UTR3         | SHOX2        | NA                | NA                                                                                                        | NA                              | rs6775325   | NA |
| chr3 | 1.67E+08 | 1.67E+08 | A  | C          | exonic       | SERPINI2     | nonsynonymous SNV | NM_006217:exon2:c.T16G:p.L6V,SERPINI2:NM_001012303:exon3:c.T16G:p.L6V                                     | NA                              | rs17246389  | P  |
| chr3 | 1.7E+08  | 1.7E+08  | C  | G          | UTR3         | PHC3         | NA                | NA                                                                                                        | NA                              | rs6444896   | NA |
| chr3 | 1.7E+08  | 1.7E+08  | C  | T          | UTR3         | CLDN11       | NA                | NA                                                                                                        | NA                              | NA          | NA |
| chr3 | 1.8E+08  | 1.8E+08  | T  | G          | UTR3         | CCDC39       | NA                | NA                                                                                                        | NA                              | NA          | NA |
| chr3 | 1.81E+08 | 1.81E+08 | G  | A          | ncRNA_exonic | SOX2-OT      | NA                | NA                                                                                                        | NA                              | rs140276576 | NA |
| chr3 | 1.81E+08 | 1.81E+08 | G  | A          | ncRNA_exonic | SOX2-OT      | NA                | NA                                                                                                        | NA                              | NA          | NA |
| chr3 | 1.81E+08 | 1.81E+08 | G  | A          | ncRNA_exonic | SOX2-OT      | NA                | NA                                                                                                        | NA                              | NA          | NA |
| chr3 | 1.81E+08 | 1.81E+08 | G  | A          | ncRNA_exonic | SOX2-OT      | NA                | NA                                                                                                        | NA                              | NA          | NA |
| chr3 | 1.81E+08 | 1.81E+08 | G  | A          | ncRNA_exonic | SOX2-OT      | NA                | NA                                                                                                        | NA                              | NA          | NA |

|      |          |          |          |     |              |          |                   |                                         |                                  |             |    |
|------|----------|----------|----------|-----|--------------|----------|-------------------|-----------------------------------------|----------------------------------|-------------|----|
| chr3 | 1.81E+08 | 1.81E+08 | G        | A   | ncRNA_exonic | SOX2-OT  | NA                | NA                                      | NA                               | NA          | NA |
| chr3 | 1.81E+08 | 1.81E+08 | G        | A   | ncRNA_exonic | SOX2-OT  | NA                | NA                                      | NA                               | NA          | NA |
| chr3 | 1.81E+08 | 1.81E+08 | G        | A   | ncRNA_exonic | SOX2-OT  | NA                | NA                                      | NA                               | NA          | NA |
| chr3 | 1.81E+08 | 1.81E+08 | GCACACAC | -   | ncRNA_exonic | SOX2-OT  | NA                | NA                                      | NA                               | rs201706406 | NA |
| chr3 | 1.84E+08 | 1.84E+08 | GTGTGT   | -   | UTR3         | EPHB3    | NA                | NA                                      | NA                               | rs35514470  | NA |
| chr3 | 1.85E+08 | 1.85E+08 | -        | T   | UTR3         | TMEM41A  | NA                | NA                                      | NA                               | NA          | NA |
| chr3 | 1.88E+08 | 1.88E+08 | AG       | -   | ncRNA_exonic | FLJ42393 | NA                | NA                                      | NA                               | rs10616335  | NA |
| chr3 | 1.89E+08 | 1.89E+08 | -        | A   | UTR3         | TPRG1    | NA                | NA                                      | NA                               | rs143657517 | NA |
| chr3 | 1.9E+08  | 1.9E+08  | TGTGTG   | -   | UTR3         | LEPREL1  | NA                | NA                                      | NA                               | NA          | NA |
| chr3 | 1.95E+08 | 1.95E+08 | -        | CTC | UTR3         | XXYLT1   | NA                | NA                                      | NA                               | rs74955255  | NA |
| chr3 | 1.95E+08 | 1.95E+08 | G        | A   | ncRNA_exonic | SDHAP2   | NA                | NA                                      | NA                               | rs56170658  | NA |
| chr3 | 1.95E+08 | 1.95E+08 | C        | G   | ncRNA_exonic | SDHAP2   | NA                | NA                                      | NA                               | rs1996904   | NA |
| chr3 | 1.95E+08 | 1.95E+08 | A        | G   | ncRNA_exonic | SDHAP2   | NA                | NA                                      | ID=COSN404758;OCCURENCE=1(lung)  | rs6583272   | NA |
| chr3 | 1.95E+08 | 1.95E+08 | T        | C   | ncRNA_exonic | SDHAP2   | NA                | NA                                      | ID=COSN404759;OCCURENCE=1(lung)  | rs6583273   | NA |
| chr3 | 1.95E+08 | 1.95E+08 | T        | G   | UTR3         | MUC20    | NA                | NA                                      | NA                               | rs12496423  | NA |
| chr3 | 1.95E+08 | 1.95E+08 | T        | C   | UTR3         | MUC20    | NA                | NA                                      | NA                               | rs2550266   | NA |
| chr3 | 1.95E+08 | 1.95E+08 | GT       | -   | UTR3         | MUC4     | NA                | NA                                      | NA                               | rs142596516 | NA |
| chr3 | 1.96E+08 | 1.96E+08 | T        | C   | exonic       | MUC4     | nonsynonymous SNV | MUC4:NM_018406:exon2:c.A12568G:p.T4190A | NA                               | rs200813870 | NA |
| chr3 | 1.96E+08 | 1.96E+08 | T        | G   | exonic       | MUC4     | nonsynonymous SNV | MUC4:NM_018406:exon2:c.A12544C:p.T4182P | NA                               | rs138720131 | NA |
| chr3 | 1.96E+08 | 1.96E+08 | A        | G   | exonic       | MUC4     | synonymous SNV    | MUC4:NM_018406:exon2:c.T12159C:p.N4053N | NA                               | rs201191776 | NA |
| chr3 | 1.96E+08 | 1.96E+08 | A        | G   | exonic       | MUC4     | nonsynonymous SNV | MUC4:NM_018406:exon2:c.T12026C:p.V4009A | NA                               | rs201051713 | NA |
| chr3 | 1.96E+08 | 1.96E+08 | C        | T   | exonic       | MUC4     | nonsynonymous SNV | MUC4:NM_018406:exon2:c.G11944A:p.A3982T | NA                               | NA          | NA |
| chr3 | 1.96E+08 | 1.96E+08 | A        | G   | exonic       | MUC4     | synonymous SNV    | MUC4:NM_018406:exon2:c.T11799C:p.H3933H | NA                               | rs62282469  | NA |
| chr3 | 1.96E+08 | 1.96E+08 | T        | A   | exonic       | MUC4     | synonymous SNV    | MUC4:NM_018406:exon2:c.A11796T:p.G3932G | NA                               | rs200897653 | NA |
| chr3 | 1.96E+08 | 1.96E+08 | C        | T   | exonic       | MUC4     | synonymous SNV    | MUC4:NM_018406:exon2:c.G11784A:p.S3928S | NA                               | rs74616719  | NA |
| chr3 | 1.96E+08 | 1.96E+08 | A        | T   | exonic       | MUC4     | synonymous SNV    | MUC4:NM_018406:exon2:c.T11643A:p.A3881A | NA                               | rs3103960   | NA |
| chr3 | 1.96E+08 | 1.96E+08 | A        | G   | exonic       | MUC4     | nonsynonymous SNV | MUC4:NM_018406:exon2:c.T11450C:p.V3817A | OSM1042849;OCCURENCE=1(endometri | rs199746940 | NA |
| chr3 | 1.96E+08 | 1.96E+08 | A        | G   | exonic       | MUC4     | nonsynonymous SNV | MUC4:NM_018406:exon2:c.T11177C:p.V3726A | NA                               | NA          | NA |
| chr3 | 1.96E+08 | 1.96E+08 | A        | G   | exonic       | MUC4     | synonymous SNV    | MUC4:NM_018406:exon2:c.T11166C:p.S3722S | NA                               | NA          | NA |
| chr3 | 1.96E+08 | 1.96E+08 | A        | G   | exonic       | MUC4     | nonsynonymous SNV | MUC4:NM_018406:exon2:c.T11162C:p.V3721A | NA                               | NA          | NA |
| chr3 | 1.96E+08 | 1.96E+08 | C        | G   | exonic       | MUC4     | nonsynonymous SNV | MUC4:NM_018406:exon2:c.G10508C:p.S3503T | NA                               | rs201339881 | NA |
| chr3 | 1.96E+08 | 1.96E+08 | C        | G   | exonic       | MUC4     | nonsynonymous SNV | MUC4:NM_018406:exon2:c.G10405C:p.D3469H | NA                               | rs76458038  | NA |
| chr3 | 1.96E+08 | 1.96E+08 | C        | T   | exonic       | MUC4     | synonymous SNV    | MUC4:NM_018406:exon2:c.G10152A:p.S3384S | NA                               | rs2453135   | NA |
| chr3 | 1.96E+08 | 1.96E+08 | C        | G   | exonic       | MUC4     | nonsynonymous SNV | MUC4:NM_018406:exon2:c.G10127C:p.R3376P | NA                               | rs425562    | NA |
| chr3 | 1.96E+08 | 1.96E+08 | T        | C   | exonic       | MUC4     | nonsynonymous SNV | MUC4:NM_018406:exon2:c.A9950G:p.D3317G  | NA                               | NA          | NA |
| chr3 | 1.96E+08 | 1.96E+08 | A        | G   | exonic       | MUC4     | synonymous SNV    | MUC4:NM_018406:exon2:c.T9735C:p.H3245H  | NA                               | NA          | NA |
| chr3 | 1.96E+08 | 1.96E+08 | C        | G   | exonic       | MUC4     | nonsynonymous SNV | MUC4:NM_018406:exon2:c.G9639C:p.Q3213H  | NA                               | NA          | NA |
| chr3 | 1.96E+08 | 1.96E+08 | A        | G   | exonic       | MUC4     | synonymous SNV    | MUC4:NM_018406:exon2:c.T9564C:p.T3188T  | NA                               | rs76276263  | NA |
| chr3 | 1.96E+08 | 1.96E+08 | A        | G   | exonic       | MUC4     | nonsynonymous SNV | MUC4:NM_018406:exon2:c.T9530C:p.V3177A  | NA                               | rs144952520 | NA |
| chr3 | 1.96E+08 | 1.96E+08 | C        | T   | exonic       | MUC4     | nonsynonymous SNV | MUC4:NM_018406:exon2:c.G9422A:p.S3141N  | NA                               | NA          | NA |
| chr3 | 1.96E+08 | 1.96E+08 | A        | G   | exonic       | MUC4     | synonymous SNV    | MUC4:NM_018406:exon2:c.T9324C:p.T3108T  | D=COSM479908;OCCURENCE=1(kidney  | rs200879287 | NA |
| chr3 | 1.96E+08 | 1.96E+08 | T        | C   | exonic       | MUC4     | nonsynonymous SNV | MUC4:NM_018406:exon2:c.A9049G:p.I3017V  | NA                               | rs71321844  | NA |
| chr3 | 1.96E+08 | 1.96E+08 | A        | G   | exonic       | MUC4     | nonsynonymous SNV | MUC4:NM_018406:exon2:c.T8801C:p.L2934P  | NA                               | NA          | NA |
| chr3 | 1.96E+08 | 1.96E+08 | C        | G   | exonic       | MUC4     | synonymous SNV    | MUC4:NM_018406:exon2:c.G8733C:p.T2911T  | NA                               | rs28385894  | NA |
| chr3 | 1.96E+08 | 1.96E+08 | A        | G   | exonic       | MUC4     | nonsynonymous SNV | MUC4:NM_018406:exon2:c.T8570C:p.V2857A  | NA                               | NA          | NA |
| chr3 | 1.96E+08 | 1.96E+08 | C        | T   | exonic       | MUC4     | nonsynonymous SNV | MUC4:NM_018406:exon2:c.G8464A:p.A2822T  | NA                               | rs28420515  | NA |
| chr3 | 1.96E+08 | 1.96E+08 | C        | T   | exonic       | MUC4     | nonsynonymous SNV | MUC4:NM_018406:exon2:c.G8416A:p.A2806T  | NA                               | NA          | NA |
| chr3 | 1.96E+08 | 1.96E+08 | T        | C   | exonic       | MUC4     | nonsynonymous SNV | MUC4:NM_018406:exon2:c.A8392G:p.T2798A  | NA                               | rs202157220 | NA |
| chr3 | 1.96E+08 | 1.96E+08 | T        | G   | exonic       | MUC4     | nonsynonymous SNV | MUC4:NM_018406:exon2:c.A8224C:p.T2742P  | NA                               | NA          | NA |
| chr3 | 1.96E+08 | 1.96E+08 | G        | T   | exonic       | MUC4     | nonsynonymous SNV | MUC4:NM_018406:exon2:c.C7888A:p.P2630T  | NA                               | NA          | NA |
| chr3 | 1.96E+08 | 1.96E+08 | T        | C   | exonic       | MUC4     | nonsynonymous SNV | MUC4:NM_018406:exon2:c.A7768G:p.T2590A  | NA                               | rs76889457  | NA |
| chr3 | 1.96E+08 | 1.96E+08 | T        | G   | exonic       | MUC4     | nonsynonymous SNV | MUC4:NM_018406:exon2:c.A7637C:p.H2546P  | NA                               | rs2453137   | NA |
| chr3 | 1.96E+08 | 1.96E+08 | C        | G   | exonic       | MUC4     | nonsynonymous SNV | MUC4:NM_018406:exon2:c.G7573C:p.D2525H  | NA                               | NA          | NA |
| chr3 | 1.96E+08 | 1.96E+08 | A        | G   | exonic       | MUC4     | synonymous SNV    | MUC4:NM_018406:exon2:c.T7518C:p.S2506S  | NA                               | NA          | NA |
| chr3 | 1.96E+08 | 1.96E+08 | C        | G   | exonic       | MUC4     | nonsynonymous SNV | MUC4:NM_018406:exon2:c.G7487C:p.R2496P  | NA                               | rs201759480 | NA |
| chr3 | 1.96E+08 | 1.96E+08 | C        | G   | exonic       | MUC4     | synonymous SNV    | MUC4:NM_018406:exon2:c.G7461C:p.S2487S  | NA                               | rs3096347   | NA |
| chr3 | 1.96E+08 | 1.96E+08 | A        | G   | exonic       | MUC4     | nonsynonymous SNV | MUC4:NM_018406:exon2:c.T7445C:p.L2482P  | NA                               | NA          | NA |
| chr3 | 1.96E+08 | 1.96E+08 | A        | G   | exonic       | MUC4     | nonsynonymous SNV | MUC4:NM_018406:exon2:c.T7418C:p.V2473A  | NA                               | rs200807157 | NA |
| chr3 | 1.96E+08 | 1.96E+08 | C        | A   | exonic       | MUC4     | nonsynonymous SNV | MUC4:NM_018406:exon2:c.G7400T:p.G2467V  | COSM149594;OCCURENCE=1(stomach)  | rs74867514  | NA |
| chr3 | 1.96E+08 | 1.96E+08 | C        | G   | exonic       | MUC4     | nonsynonymous SNV | MUC4:NM_018406:exon2:c.G7189C:p.D2397H  | NA                               | NA          | NA |
| chr3 | 1.96E+08 | 1.96E+08 | A        | G   | exonic       | MUC4     | nonsynonymous SNV | MUC4:NM_018406:exon2:c.T6977C:p.L2326P  | NA                               | rs71637184  | NA |
| chr3 | 1.96E+08 | 1.96E+08 | C        | T   | exonic       | MUC4     | synonymous SNV    | MUC4:NM_018406:exon2:c.G6795A:p.V2265V  | NA                               | NA          | NA |
| chr3 | 1.96E+08 | 1.96E+08 | C        | G   | exonic       | MUC4     | nonsynonymous SNV | MUC4:NM_018406:exon2:c.G6711C:p.Q2237H  | NA                               | rs201069012 | NA |
| chr3 | 1.96E+08 | 1.96E+08 | A        | G   | exonic       | MUC4     | nonsynonymous SNV | MUC4:NM_018406:exon2:c.T6677C:p.L2226P  | NA                               | rs78501179  | NA |
| chr3 | 1.96E+08 | 1.96E+08 | A        | G   | exonic       | MUC4     | nonsynonymous SNV | MUC4:NM_018406:exon2:c.T6293C:p.L2098P  | NA                               | rs141952317 | NA |
| chr3 | 1.96E+08 | 1.96E+08 | A        | T   | exonic       | MUC4     | synonymous SNV    | MUC4:NM_018406:exon2:c.T6081A:p.T2027T  | NA                               | NA          | NA |

|      |          |          |           |         |              |          |                        |                                                                                              |                                 |             |    |
|------|----------|----------|-----------|---------|--------------|----------|------------------------|----------------------------------------------------------------------------------------------|---------------------------------|-------------|----|
| chr3 | 1.96E+08 | 1.96E+08 | A         | G       | exonic       | MUC4     | synonymous SNV         | MUC4:NM_018406:exon2:c.T6030C:p.S2010S                                                       | NA                              | NA          | NA |
| chr3 | 1.96E+08 | 1.96E+08 | A         | G       | exonic       | MUC4     | synonymous SNV         | MUC4:NM_018406:exon2:c.T5991C:p.H1997H                                                       | NA                              | rs201804964 | NA |
| chr3 | 1.96E+08 | 1.96E+08 | C         | T       | exonic       | MUC4     | synonymous SNV         | MUC4:NM_018406:exon2:c.G5979A:p.V1993V                                                       | NA                              | NA          | NA |
| chr3 | 1.96E+08 | 1.96E+08 | C         | G       | exonic       | MUC4     | synonymous SNV         | MUC4:NM_018406:exon2:c.G5805C:p.T1935T                                                       | NA                              | rs3107750   | NA |
| chr3 | 1.96E+08 | 1.96E+08 | C         | T       | exonic       | MUC4     | synonymous SNV         | MUC4:NM_018406:exon2:c.G5400A:p.S1800S                                                       | NA                              | NA          | NA |
| chr3 | 1.96E+08 | 1.96E+08 | T         | A       | exonic       | MUC4     | synonymous SNV         | MUC4:NM_018406:exon2:c.A5328T:p.P1776P                                                       | NA                              | NA          | NA |
| chr3 | 1.96E+08 | 1.96E+08 | A         | C       | exonic       | MUC4     | synonymous SNV         | MUC4:NM_018406:exon2:c.T5106G:p.V1702V                                                       | NA                              | rs71321841  | NA |
| chr3 | 1.96E+08 | 1.96E+08 | G         | A       | exonic       | MUC4     | nonsynonymous SNV      | MUC4:NM_018406:exon2:c.C4919T:p.S1640L                                                       | NA                              | rs202024324 | NA |
| chr3 | 1.96E+08 | 1.96E+08 | C         | G       | exonic       | MUC4     | nonsynonymous SNV      | MUC4:NM_018406:exon2:c.G4885C:p.D1629H                                                       | NA                              | rs78438024  | NA |
| chr3 | 1.96E+08 | 1.96E+08 | C         | G       | exonic       | MUC4     | nonsynonymous SNV      | MUC4:NM_018406:exon2:c.G4789C:p.D1597H                                                       | NA                              | NA          | NA |
| chr3 | 1.96E+08 | 1.96E+08 | T         | G       | exonic       | MUC4     | nonsynonymous SNV      | MUC4:NM_018406:exon2:c.A4517C:p.H1506P                                                       | NA                              | NA          | NA |
| chr3 | 1.96E+08 | 1.96E+08 | A         | G       | exonic       | MUC4     | synonymous SNV         | MUC4:NM_018406:exon2:c.T4509C:p.T1503T                                                       | NA                              | NA          | NA |
| chr3 | 1.96E+08 | 1.96E+08 | T         | A       | exonic       | MUC4     | synonymous SNV         | MUC4:NM_018406:exon2:c.A4347T:p.A1449A                                                       | NA                              | rs77907507  | NA |
| chr3 | 1.96E+08 | 1.96E+08 | C         | T       | exonic       | MUC4     | nonsynonymous SNV      | MUC4:NM_018406:exon2:c.G4216A:p.A1406T                                                       | NA                              | NA          | NA |
| chr3 | 1.96E+08 | 1.96E+08 | A         | G       | exonic       | MUC4     | synonymous SNV         | MUC4:NM_018406:exon2:c.T4092C:p.T1364T                                                       | NA                              | rs200702396 | NA |
| chr3 | 1.96E+08 | 1.96E+08 | A         | G       | exonic       | MUC4     | synonymous SNV         | MUC4:NM_018406:exon2:c.T3885C:p.T1295T                                                       | NA                              | NA          | NA |
| chr3 | 1.96E+08 | 1.96E+08 | C         | G       | exonic       | MUC4     | synonymous SNV         | MUC4:NM_018406:exon2:c.G3837C:p.T1279T                                                       | NA                              | rs200143504 | NA |
| chr3 | 1.96E+08 | 1.96E+08 | C         | G       | exonic       | MUC4     | nonsynonymous SNV      | MUC4:NM_018406:exon2:c.G3783C:p.Q1261H                                                       | NA                              | NA          | NA |
| chr3 | 1.96E+08 | 1.96E+08 | T         | G       | exonic       | MUC4     | synonymous SNV         | MUC4:NM_018406:exon2:c.A3705C:p.V1235V                                                       | NA                              | rs202086228 | NA |
| chr3 | 1.96E+08 | 1.96E+08 | C         | G       | exonic       | MUC4     | synonymous SNV         | MUC4:NM_018406:exon2:c.G3549C:p.T1183T                                                       | NA                              | rs201387180 | NA |
| chr3 | 1.96E+08 | 1.96E+08 | C         | G       | exonic       | MUC4     | nonsynonymous SNV      | MUC4:NM_018406:exon2:c.G3495C:p.Q1165H                                                       | NA                              | rs201497377 | NA |
| chr3 | 1.96E+08 | 1.96E+08 | A         | G       | exonic       | MUC4     | synonymous SNV         | MUC4:NM_018406:exon2:c.T3471C:p.D1157D                                                       | NA                              | NA          | NA |
| chr3 | 1.96E+08 | 1.96E+08 | A         | G       | exonic       | MUC4     | synonymous SNV         | MUC4:NM_018406:exon2:c.T3468C:p.T1156T                                                       | NA                              | NA          | NA |
| chr3 | 1.96E+08 | 1.96E+08 | A         | G       | exonic       | MUC4     | nonsynonymous SNV      | MUC4:NM_018406:exon2:c.T3434C:p.V1145A                                                       | 1149615,COSM149616;OCCURENCE=1( | rs199883835 | NA |
| chr3 | 1.96E+08 | 1.96E+08 | C         | T       | exonic       | MUC4     | nonsynonymous SNV      | MUC4:NM_018406:exon2:c.G3085A:p.D1029N                                                       | NA                              | rs201613765 | NA |
| chr3 | 1.96E+08 | 1.96E+08 | T         | C       | ncRNA_exonic | SDHAP1   | NA                     | NA                                                                                           | NA                              | rs189732960 | NA |
| chr3 | 1.96E+08 | 1.96E+08 | A         | G       | ncRNA_exonic | SDHAP1   | NA                     | NA                                                                                           | NA                              | rs199975852 | NA |
| chr3 | 1.96E+08 | 1.96E+08 | A         | G       | ncRNA_exonic | SDHAP1   | NA                     | NA                                                                                           | NA                              | rs200738162 | NA |
| chr3 | 1.97E+08 | 1.97E+08 | -         | TTTTTTT | UTR3         | SENPS    | NA                     | NA                                                                                           | NA                              | NA          | NA |
| chr3 | 1.98E+08 | 1.98E+08 | TCAGCAGC/ | -       | exonic       | FAM157A  | nonframeshift deletion | FAM157A:NM_001145248:exon2:c.210_218del:p.70_73del                                           | NA                              | NA          | NA |
| chr3 | 1.98E+08 | 1.98E+08 | A         | C       | exonic       | FAM157A  | synonymous SNV         | FAM157A:NM_001145248:exon5:c.A927C:p.R309R                                                   | NA                              | rs202207735 | NA |
| chr4 | 87567    | 87567    | G         | T       | UTR3         | ZNF595   | NA                     | NA                                                                                           | NA                              | NA          | NA |
| chr4 | 87570    | 87570    | C         | T       | UTR3         | ZNF595   | NA                     | NA                                                                                           | NA                              | NA          | NA |
| chr4 | 87574    | 87574    | G         | T       | UTR3         | ZNF595   | NA                     | NA                                                                                           | NA                              | NA          | NA |
| chr4 | 1020099  | 1020099  | G         | A       | UTR3         | FGFRL1   | NA                     | NA                                                                                           | NA                              | NA          | NA |
| chr4 | 1020221  | 1020221  | T         | C       | UTR3         | FGFRL1   | NA                     | NA                                                                                           | NA                              | NA          | NA |
| chr4 | 1388662  | 1388662  | G         | C       | exonic       | CRIPAK   | synonymous SNV         | CRIPAK:NM_175918:exon1:c.G363C:p.P121P                                                       | NA                              | rs9762106   | NA |
| chr4 | 1388755  | 1388755  | C         | G       | exonic       | CRIPAK   | synonymous SNV         | CRIPAK:NM_175918:exon1:c.C456G:p.P152P                                                       | NA                              | rs141481663 | NA |
| chr4 | 1388757  | 1388757  | T         | C       | exonic       | CRIPAK   | nonsynonymous SNV      | CRIPAK:NM_175918:exon1:c.T458C:p.M153T                                                       | ID=COSM225540;OCCURENCE=1(NS)   | rs138170890 | P  |
| chr4 | 1388848  | 1388848  | A         | C       | exonic       | CRIPAK   | synonymous SNV         | CRIPAK:NM_175918:exon1:c.A549C:p.P183P                                                       | NA                              | rs74511366  | NA |
| chr4 | 1389059  | 1389059  | T         | C       | exonic       | CRIPAK   | nonsynonymous SNV      | CRIPAK:NM_175918:exon1:c.T760C:p.C254R                                                       | NA                              | NA          | D  |
| chr4 | 1389070  | 1389070  | A         | G       | exonic       | CRIPAK   | synonymous SNV         | CRIPAK:NM_175918:exon1:c.A771G:p.G257G                                                       | NA                              | rs151096093 | NA |
| chr4 | 2087366  | 2087366  | G         | T       | exonic       | POLN     | nonsynonymous SNV      | POLN:NM_181808:exon19:c.C2171A:p.A724E                                                       | NA                              | NA          | B  |
| chr4 | 2233366  | 2233366  | G         | T       | UTR3         | HAUS3    | NA                     | NA                                                                                           | NA                              | rs3762940   | NA |
| chr4 | 2932486  | 2932486  | T         | G       | UTR3         | MFS10    | NA                     | NA                                                                                           | NA                              | NA          | NA |
| chr4 | 5814242  | 5814242  | G         | T       | UTR3         | EVC      | NA                     | NA                                                                                           | NA                              | NA          | NA |
| chr4 | 6594947  | 6594947  | A         | C       | exonic       | MAN2B2   | nonsynonymous SNV      | MAN2B2:NM_015274:exon6:c.A728C:p.Q243P                                                       | NA                              | rs2301796   | B  |
| chr4 | 7743171  | 7743171  | A         | G       | UTR3         | SORCS2   | NA                     | NA                                                                                           | NA                              | NA          | NA |
| chr4 | 8582513  | 8582513  | T         | G       | UTR5         | GPR78    | NA                     | NA                                                                                           | NA                              | rs4235270   | NA |
| chr4 | 17804654 | 17804654 | T         | -       | UTR3         | DCAF16   | NA                     | NA                                                                                           | NA                              | NA          | NA |
| chr4 | 20731086 | 20731088 | ATA       | -       | UTR3         | KCNIP4   | NA                     | NA                                                                                           | NA                              | rs75646296  | NA |
| chr4 | 20731095 | 20731112 | TTTAAATG  | -       | UTR3         | KCNIP4   | NA                     | NA                                                                                           | NA                              | rs139112400 | NA |
| chr4 | 20852166 | 20852166 | A         | G       | exonic       | KCNIP4   | synonymous SNV         | IM_001035004:exon2:c.T102C:p.N34N,KCNIP4:NM_025221:exon2:c.T                                 | NA                              | rs3765121   | NA |
| chr4 | 22439886 | 22439886 | C         | A       | exonic       | GPR125   | nonsynonymous SNV      | GPR125:NM_145290:exon8:c.G1078T:p.D360Y                                                      | NA                              | NA          | D  |
| chr4 | 24832309 | 24832309 | C         | T       | intronic     | CCDC149  | NA                     | NA                                                                                           | NA                              | rs12511680  | NA |
| chr4 | 25280824 | 25280824 | C         | T       | UTR3         | PI4K2B   | NA                     | NA                                                                                           | NA                              | NA          | NA |
| chr4 | 25749200 | 25749201 | AC        | -       | UTR3         | SEL1L3   | NA                     | NA                                                                                           | NA                              | rs147448161 | NA |
| chr4 | 37614259 | 37614260 | AA        | -       | UTR3         | RELL1    | NA                     | NA                                                                                           | NA                              | NA          | NA |
| chr4 | 38626841 | 38626841 | G         | C       | ncRNA_exonic | FLJ13197 | NA                     | NA                                                                                           | NA                              | rs34075114  | NA |
| chr4 | 39501647 | 39501647 | -         | A       | UTR3         | UGDH     | NA                     | NA                                                                                           | NA                              | rs71645103  | NA |
| chr4 | 41747030 | 41747030 | T         | G       | UTR3         | PHOX2B   | NA                     | NA                                                                                           | NA                              | NA          | NA |
| chr4 | 46314593 | 46314593 | T         | C       | exonic       | GABRA2   | synonymous SNV         | _001114175:exon4:c.A396G:p.K132K,GABRA2:NM_000807:exon5:c.A3=COSM1178493;OCCURENCE=1(prostat | rs279858                        | NA          | NA |
| chr4 | 71347281 | 71347281 | G         | T       | exonic       | MUC7     | nonsynonymous SNV      | :p.A274S,MUC7:NM_001145006:exon4:c.G820T:p.A274S,MUC7:NM_(                                   | NA                              | NA          | NA |
| chr4 | 71521932 | 71521932 | A         | -       | UTR3         | IGJ      | NA                     | NA                                                                                           | NA                              | NA          | NA |
| chr4 | 74963303 | 74963303 | -         | AAAT    | UTR3         | CXCL2    | NA                     | NA                                                                                           | NA                              | rs149438582 | NA |
| chr4 | 74964830 | 74964830 | C         | T       | exonic       | CXCL2    | nonsynonymous SNV      | CXCL2:NM_002089:exon1:c.G8A:p.R3H                                                            | NA                              | rs186397980 | B  |

|      |          |          |         |       |              |           |                   |                                                              |                                   |             |    |
|------|----------|----------|---------|-------|--------------|-----------|-------------------|--------------------------------------------------------------|-----------------------------------|-------------|----|
| chr4 | 75858518 | 75858518 | G       | C     | UTR5         | PARM1     | NA                | NA                                                           | NA                                | rs75120017  | NA |
| chr4 | 76555253 | 76555253 | G       | A     | UTR5         | CDKL2     | NA                | NA                                                           | NA                                | NA          | NA |
| chr4 | 78635593 | 78635614 | AAAAAAA | -     | UTR3         | CNOT6L    | NA                | NA                                                           | NA                                | NA          | NA |
| chr4 | 80824302 | 80824302 | -       | A     | UTR3         | ANTXR2    | NA                | NA                                                           | NA                                | NA          | NA |
| chr4 | 80993796 | 80993796 | G       | T     | UTR5         | ANTXR2    | NA                | NA                                                           | NA                                | rs13140055  | NA |
| chr4 | 82088324 | 82088324 | G       | A     | exonic       | PRKG2     | synonymous SNV    | PRKG2:NM_006259:exon5:c.C903T:p.C301C                        | NA                                | NA          | NA |
| chr4 | 83841089 | 83841116 | GATTA   | -     | UTR3         | THAP9     | NA                | NA                                                           | NA                                | NA          | NA |
| chr4 | 88225032 | 88225032 | -       | GTTA  | UTR3         | HSD17B13  | NA                | NA                                                           | NA                                | rs141759852 | NA |
| chr4 | 88536471 | 88536471 | A       | G     | exonic       | DSPP      | nonsynonymous SNV | DSPP:NM_014208:exon5:c.A2657G:p.N886S                        | NA                                | NA          | NA |
| chr4 | 88536475 | 88536475 | A       | C     | exonic       | DSPP      | nonsynonymous SNV | DSPP:NM_014208:exon5:c.A2661C:p.E887D                        | NA                                | NA          | NA |
| chr4 | 88536883 | 88536883 | T       | C     | exonic       | DSPP      | synonymous SNV    | DSPP:NM_014208:exon5:c.T3069C:p.N1023N                       | NA                                | rs139018672 | NA |
| chr4 | 88536899 | 88536899 | A       | G     | exonic       | DSPP      | nonsynonymous SNV | DSPP:NM_014208:exon5:c.A3085G:p.N1029D                       | NA                                | rs150637282 | NA |
| chr4 | 88536901 | 88536901 | C       | T     | exonic       | DSPP      | synonymous SNV    | DSPP:NM_014208:exon5:c.C3087T:p.N1029N                       | NA                                | rs148817324 | NA |
| chr4 | 88537135 | 88537135 | T       | C     | exonic       | DSPP      | synonymous SNV    | DSPP:NM_014208:exon5:c.T3321C:p.D1107D                       | NA                                | NA          | NA |
| chr4 | 88537150 | 88537150 | C       | T     | exonic       | DSPP      | synonymous SNV    | DSPP:NM_014208:exon5:c.C3336T:p.S1112S                       | NA                                | NA          | NA |
| chr4 | 88537261 | 88537261 | A       | T     | exonic       | DSPP      | nonsynonymous SNV | DSPP:NM_014208:exon5:c.A3447T:p.E1149D                       | NA                                | rs200612038 | NA |
| chr4 | 88537441 | 88537441 | C       | T     | exonic       | DSPP      | synonymous SNV    | DSPP:NM_014208:exon5:c.C3627T:p.D1209D                       | NA                                | NA          | NA |
| chr4 | 88537509 | 88537509 | A       | G     | exonic       | DSPP      | nonsynonymous SNV | DSPP:NM_014208:exon5:c.A3695G:p.N1232S                       | ID=COSM226972;OCCURENCE=1(skin)   | rs111876111 | NA |
| chr4 | 88537513 | 88537513 | A       | C     | exonic       | DSPP      | nonsynonymous SNV | DSPP:NM_014208:exon5:c.A3699C:p.E1233D                       | NA                                | rs112275895 | NA |
| chr4 | 90757919 | 90757919 | T       | C     | ncRNA_UTR5   | SNCA      | NA                | NA                                                           | NA                                | NA          | NA |
| chr4 | 94750481 | 94750481 | T       | G     | exonic       | ATOH1     | nonsynonymous SNV | ATOH1:NM_005172:exon1:c.T404G:p.V135G                        | NA                                | NA          | B  |
| chr4 | 96076626 | 96076626 | -       | TT    | UTR3         | BMPR1B    | NA                | NA                                                           | NA                                | NA          | NA |
| chr4 | 1E+08    | 1E+08    | G       | C     | UTR5         | MTTP      | NA                | NA                                                           | NA                                | rs11944749  | NA |
| chr4 | 1.01E+08 | 1.01E+08 | AAA     | -     | UTR3         | MTTP      | NA                | NA                                                           | NA                                | NA          | NA |
| chr4 | 1.04E+08 | 1.04E+08 | A       | T     | UTR3         | NFKB1     | NA                | NA                                                           | NA                                | NA          | NA |
| chr4 | 1.04E+08 | 1.04E+08 | A       | T     | UTR3         | SLC9B1    | NA                | NA                                                           | NA                                | rs4881610   | NA |
| chr4 | 1.14E+08 | 1.14E+08 | A       | C     | exonic       | ANK2      | nonsynonymous SNV | ANK2:NM_001148:exon38:c.A5702C:p.H1901P                      | NA                                | NA          | D  |
| chr4 | 1.14E+08 | 1.14E+08 | T       | C     | exonic       | ANK2      | synonymous SNV    | ANK2:NM_001148:exon38:c.T5739C:p.R1913R                      | NA                                | NA          | NA |
| chr4 | 1.19E+08 | 1.19E+08 | T       | C     | exonic       | PRSS12    | synonymous SNV    | PRSS12:NM_003619:exon6:c.A1281G:p.Q427Q                      | rs=COSM149728;OCCURENCE=1(stomac) | rs2292597   | NA |
| chr4 | 1.29E+08 | 1.29E+08 | T       | C     | UTR3         | MFS5D8    | NA                | NA                                                           | NA                                | NA          | NA |
| chr4 | 1.3E+08  | 1.3E+08  | G       | A     | UTR3         | PHF17     | NA                | NA                                                           | NA                                | NA          | NA |
| chr4 | 1.39E+08 | 1.39E+08 | G       | T     | ncRNA_UTR3   | SLC7A11   | NA                | NA                                                           | NA                                | NA          | NA |
| chr4 | 1.4E+08  | 1.4E+08  | C       | T     | UTR3         | CCRN4L    | NA                | NA                                                           | NA                                | NA          | NA |
| chr4 | 1.4E+08  | 1.4E+08  | A       | T     | UTR3         | CCRN4L    | NA                | NA                                                           | NA                                | rs74826922  | NA |
| chr4 | 1.4E+08  | 1.4E+08  | T       | -     | UTR3         | NAA15     | NA                | NA                                                           | NA                                | rs72425271  | NA |
| chr4 | 1.46E+08 | 1.46E+08 | A       | G     | UTR3         | OTUD4     | NA                | NA                                                           | NA                                | NA          | NA |
| chr4 | 1.53E+08 | 1.53E+08 | A       | -     | UTR3         | FBXW7     | NA                | NA                                                           | NA                                | rs3841114   | NA |
| chr4 | 1.57E+08 | 1.57E+08 | A       | -     | UTR3         | GUCY1A3   | NA                | NA                                                           | NA                                | rs34880260  | NA |
| chr4 | 1.58E+08 | 1.58E+08 | A       | G     | UTR5         | GRIA2     | NA                | NA                                                           | NA                                | NA          | NA |
| chr4 | 1.59E+08 | 1.59E+08 | G       | A     | exonic       | TMEM144   | synonymous SNV    | TMEM144:NM_018342:exon9:c.G564A:p.V188V                      | NA                                | rs12504074  | NA |
| chr4 | 1.59E+08 | 1.59E+08 | C       | A     | UTR3         | TMEM144   | NA                | NA                                                           | NA                                | rs1047725   | NA |
| chr4 | 1.6E+08  | 1.6E+08  | AA      | -     | UTR3         | FNIP2     | NA                | NA                                                           | NA                                | NA          | NA |
| chr4 | 1.83E+08 | 1.83E+08 | A       | T     | ncRNA_exonic | MGC45800  | NA                | NA                                                           | NA                                | rs11132113  | NA |
| chr4 | 1.84E+08 | 1.84E+08 | -       | ATTTT | ncRNA_exonic | FAM92A1P2 | NA                | NA                                                           | NA                                | rs10645315  | NA |
| chr4 | 1.85E+08 | 1.85E+08 | -       | A     | UTR3         | STOX2     | NA                | NA                                                           | NA                                | NA          | NA |
| chr4 | 1.87E+08 | 1.87E+08 | C       | A     | exonic       | CYP4V2    | nonsynonymous SNV | CYP4V2:NM_207352:exon6:c.C775A:p.Q259K                       | NA                                | rs13146272  | B  |
| chr4 | 1.87E+08 | 1.87E+08 | C       | T     | UTR3         | CYP4V2    | NA                | NA                                                           | NA                                | rs62348765  | NA |
| chr5 | 443236   | 443236   | C       | G     | UTR5         | C5orf55   | NA                | NA                                                           | NA                                | rs115554641 | NA |
| chr5 | 661471   | 661471   | A       | C     | UTR3         | TPPP      | NA                | NA                                                           | NA                                | rs148811543 | NA |
| chr5 | 661489   | 661489   | G       | C     | UTR3         | TPPP      | NA                | NA                                                           | NA                                | rs13160060  | NA |
| chr5 | 661496   | 661496   | C       | G     | UTR3         | TPPP      | NA                | NA                                                           | NA                                | rs13174941  | NA |
| chr5 | 661502   | 661502   | A       | C     | UTR3         | TPPP      | NA                | NA                                                           | NA                                | NA          | NA |
| chr5 | 663032   | 663032   | G       | A     | UTR3         | TPPP      | NA                | NA                                                           | NA                                | NA          | NA |
| chr5 | 663113   | 663113   | C       | T     | UTR3         | TPPP      | NA                | NA                                                           | NA                                | rs111333472 | NA |
| chr5 | 663185   | 663185   | C       | T     | UTR3         | TPPP      | NA                | NA                                                           | NA                                | rs9313157   | NA |
| chr5 | 663244   | 663244   | T       | G     | UTR3         | TPPP      | NA                | NA                                                           | NA                                | NA          | NA |
| chr5 | 833915   | 833915   | G       | T     | exonic       | ZDHH11    | nonsynonymous SNV | ZDHH11:NM_024786:exon7:c.C908A:p.A303D                       | rs=COSM131335;OCCURENCE=1(liver)  | rs605088    | B  |
| chr5 | 1036435  | 1036435  | G       | A     | exonic       | NKD2      | synonymous SNV    | _001271082:exon9:c.G723A:p.T241T,NKD2:NM_033120:exon9:c.G723 | NA                                | rs73026757  | NA |
| chr5 | 10239261 | 10239261 | G       | A     | exonic       | FAM173B   | nonsynonymous SNV | !4T:p.T75M,FAM173B:NM_001258389:exon2:c.C224T:p.T75M,FAM17   | NA                                | rs2438652   | B  |
| chr5 | 10279657 | 10279657 | T       | -     | UTR3         | CMBL      | NA                | NA                                                           | NA                                | NA          | NA |
| chr5 | 14696103 | 14696103 | T       | -     | UTR3         | FAM105B   | NA                | NA                                                           | NA                                | rs35172360  | NA |
| chr5 | 15937663 | 15937663 | C       | A     | UTR3         | FBXL7     | NA                | NA                                                           | NA                                | rs113454368 | NA |
| chr5 | 16465854 | 16465854 | A       | C     | UTR5         | ZNF622    | NA                | NA                                                           | NA                                | NA          | NA |
| chr5 | 16794916 | 16794916 | G       | A     | exonic       | MYO10     | synonymous SNV    | MYO10:NM_012334:exon4:c.C306T:p.S102S                        | NA                                | rs396514    | NA |
| chr5 | 17276053 | 17276053 | -       | CT    | UTR3         | BASP1     | NA                | NA                                                           | NA                                | NA          | NA |
| chr5 | 23521146 | 23521146 | G       | T     | exonic       | PRDM9     | synonymous SNV    | PRDM9:NM_020227:exon6:c.G366T:p.A122A                        | NA                                | NA          | NA |



|      |          |          |          |      |                |           |                         |                                                               |                                  |             |    |
|------|----------|----------|----------|------|----------------|-----------|-------------------------|---------------------------------------------------------------|----------------------------------|-------------|----|
| chr5 | 23527323 | 23527323 | C        | G    | exonic         | PRDM9     | nonsynonymous SNV       | PRDM9:NM_020227:exon11:c.C2126G:p.T709S                       | NA                               | rs200539936 | B  |
| chr5 | 23527492 | 23527492 | A        | T    | exonic         | PRDM9     | nonsynonymous SNV       | PRDM9:NM_020227:exon11:c.A2295T:p.R765S                       | CURENCE=1(haematopoietic_and_lym | rs112815500 | B  |
| chr5 | 23527555 | 23527555 | A        | C    | exonic         | PRDM9     | nonsynonymous SNV       | PRDM9:NM_020227:exon11:c.A2358C:p.R786S                       | M226129;OCCURENCE=1(NS),2(endom  | rs200853373 | B  |
| chr5 | 23527721 | 23527721 | C        | A    | exonic         | PRDM9     | nonsynonymous SNV       | PRDM9:NM_020227:exon11:c.C2524A:p.R842S                       | NA                               | rs201643800 | B  |
| chr5 | 33937999 | 33937999 | A        | C    | exonic         | RXFP3     | nonsynonymous SNV       | RXFP3:NM_016568:exon1:c.A1154C:p.N385T                        | NA                               | NA          | D  |
| chr5 | 35909976 | 35909976 | C        | A    | exonic         | CAPSL     | nonsynonymous SNV       | _001042625:exon4:c.G517T:p.D173Y,CAPSL:NM_144647:exon4:c.G51: | NA                               | NA          | D  |
| chr5 | 43042495 | 43042495 | T        | G    | ncRNA_exonic   | LOC153684 | NA                      | NA                                                            | NA                               | NA          | NA |
| chr5 | 43290195 | 43290195 | A        | -    | UTR3           | HMGCS1    | NA                      | NA                                                            | NA                               | NA          | NA |
| chr5 | 52388455 | 52388455 | A        | -    | UTR3           | ITGA2     | NA                      | NA                                                            | NA                               | NA          | NA |
| chr5 | 55168106 | 55168106 | G        | T    | exonic         | IL31RA    | nonsynonymous SNV       | 1_001242637:exon4:c.G281T:p.G94V,IL31RA:NM_139017:exon4:c.G28 | NA                               | NA          | B  |
| chr5 | 61000547 | 61000547 | T        | -    | UTR3           | C5orf64   | NA                      | NA                                                            | NA                               | rs34116602  | NA |
| chr5 | 70672628 | 70672628 | T        | -    | ncRNA_exonic   | PMCHL2    | NA                      | NA                                                            | NA                               | rs199622932 | NA |
| chr5 | 71503811 | 71503811 | G        | T    | UTR3           | MAP1B     | NA                      | NA                                                            | NA                               | NA          | NA |
| chr5 | 78324457 | 78324457 | C        | A    | exonic         | DMGDH     | nonsynonymous SNV       | DMGDH:NM_013391:exon12:c.G1831T:p.A611S                       | NA                               | NA          | B  |
| chr5 | 78809641 | 78809641 | C        | A    | UTR5           | HOMER1    | NA                      | NA                                                            | NA                               | NA          | NA |
| chr5 | 80738520 | 80738520 | G        | T    | exonic         | SSBP2     | nonsynonymous SNV       | 001256735:exon12:c.C711A:p.N237K,SSBP2:NM_001256736:exon12:c. | NA                               | NA          | D  |
| chr5 | 90666826 | 90666826 | A        | -    | UTR3           | ARRDC3    | NA                      | NA                                                            | NA                               | NA          | NA |
| chr5 | 92905599 | 92905599 | C        | A    | ncRNA_exonic   | FLJ42709  | NA                      | NA                                                            | NA                               | NA          | NA |
| chr5 | 93488502 | 93488502 | A        | T    | UTR3           | KIAA0825  | NA                      | NA                                                            | NA                               | rs72771613  | NA |
| chr5 | 93488608 | 93488608 | T        | A    | UTR3           | KIAA0825  | NA                      | NA                                                            | NA                               | rs6892655   | NA |
| chr5 | 94278129 | 94278129 | T        | C    | exonic         | MCTP1     | synonymous SNV          | _001002796:exon4:c.A321G:p.V107V,MCTP1:NM_024717:exon4:c.A9E  | NA                               | rs293035    | NA |
| chr5 | 1.02E+08 | 1.02E+08 | GT       | -    | UTR3           | SLCO4C1   | NA                      | NA                                                            | NA                               | NA          | NA |
| chr5 | 1.09E+08 | 1.09E+08 | AA       | -    | UTR3           | MAN2A1    | NA                      | NA                                                            | NA                               | NA          | NA |
| chr5 | 1.15E+08 | 1.15E+08 | -        | AGGC | UTR5           | AP3S1     | NA                      | NA                                                            | NA                               | rs144226661 | NA |
| chr5 | 1.15E+08 | 1.15E+08 | C        | T    | exonic         | COMMD10   | synonymous SNV          | COMMD10:NM_016144:exon5:c.C408T:p.T136T                       | )=COSM149902;OCCURENCE=1(stomac  | rs1129496   | NA |
| chr5 | 1.16E+08 | 1.16E+08 | A        | -    | UTR3           | SEMA6A    | NA                      | NA                                                            | NA                               | rs35304104  | NA |
| chr5 | 1.19E+08 | 1.19E+08 | -        | A    | UTR3           | HSD17B4   | NA                      | NA                                                            | NA                               | NA          | NA |
| chr5 | 1.22E+08 | 1.22E+08 | CACACACA | -    | UTR3           | SNX2      | NA                      | NA                                                            | NA                               | rs71851865  | NA |
| chr5 | 1.22E+08 | 1.22E+08 | A        | -    | UTR3           | SNX2      | NA                      | NA                                                            | NA                               | NA          | NA |
| chr5 | 1.24E+08 | 1.24E+08 | -        | AA   | UTR3           | ZNF608    | NA                      | NA                                                            | NA                               | NA          | NA |
| chr5 | 1.26E+08 | 1.26E+08 | C        | T    | UTR3           | 3-Mar     | NA                      | NA                                                            | NA                               | rs75301583  | NA |
| chr5 | 1.26E+08 | 1.26E+08 | T        | -    | UTR3           | C5orf63   | NA                      | NA                                                            | NA                               | NA          | NA |
| chr5 | 1.28E+08 | 1.28E+08 | T        | -    | UTR3           | SLC12A2   | NA                      | NA                                                            | NA                               | rs71949635  | NA |
| chr5 | 1.28E+08 | 1.28E+08 | T        | -    | UTR3           | SLC12A2   | NA                      | NA                                                            | NA                               | rs140582306 | NA |
| chr5 | 1.31E+08 | 1.31E+08 | -        | T    | UTR3           | RAPGEF6   | NA                      | NA                                                            | NA                               | NA          | NA |
| chr5 | 1.32E+08 | 1.32E+08 | C        | T    | UTR3           | SLC22A5   | NA                      | NA                                                            | NA                               | NA          | NA |
| chr5 | 1.32E+08 | 1.32E+08 | T        | G    | ncRNA_intronic | C5orf56   | NA                      | NA                                                            | NA                               | NA          | NA |
| chr5 | 1.32E+08 | 1.32E+08 | C        | T    | ncRNA_intronic | C5orf56   | NA                      | NA                                                            | NA                               | rs2522050   | NA |
| chr5 | 1.34E+08 | 1.34E+08 | C        | A    | UTR3           | DDX46     | NA                      | NA                                                            | NA                               | NA          | NA |
| chr5 | 1.34E+08 | 1.34E+08 | AAATAAAT | -    | UTR3           | C5orf24   | NA                      | NA                                                            | NA                               | NA          | NA |
| chr5 | 1.35E+08 | 1.35E+08 | G        | T    | ncRNA_exonic   | SMAD5-AS1 | NA                      | NA                                                            | NA                               | NA          | NA |
| chr5 | 1.36E+08 | 1.36E+08 | T        | C    | ncRNA_exonic   | LOC389332 | NA                      | NA                                                            | NA                               | rs6889814   | NA |
| chr5 | 1.37E+08 | 1.37E+08 | A        | C    | UTR3           | HNRNPA0   | NA                      | NA                                                            | NA                               | NA          | NA |
| chr5 | 1.37E+08 | 1.37E+08 | T        | C    | UTR3           | HNRNPA0   | NA                      | NA                                                            | NA                               | NA          | NA |
| chr5 | 1.37E+08 | 1.37E+08 | G        | C    | exonic         | HNRNPA0   | synonymous SNV          | HNRNPA0:NM_006805:exon1:c.C897G:p.G299G                       | NA                               | NA          | NA |
| chr5 | 1.37E+08 | 1.37E+08 | A        | C    | exonic         | HNRNPA0   | synonymous SNV          | HNRNPA0:NM_006805:exon1:c.T888G:p.G296G                       | NA                               | NA          | NA |
| chr5 | 1.38E+08 | 1.38E+08 | -        | GTGT | UTR3           | LRRTM2    | NA                      | NA                                                            | NA                               | NA          | NA |
| chr5 | 1.39E+08 | 1.39E+08 | C        | G    | exonic         | CXXC5     | synonymous SNV          | CXXC5:NM_016463:exon2:c.C294G:p.G98G                          | NA                               | NA          | NA |
| chr5 | 1.39E+08 | 1.39E+08 | -        | A    | UTR3           | PURA      | NA                      | NA                                                            | NA                               | NA          | NA |
| chr5 | 1.41E+08 | 1.41E+08 | G        | T    | UTR3           | PCDHB9    | NA                      | NA                                                            | NA                               | NA          | NA |
| chr5 | 1.41E+08 | 1.41E+08 | T        | C    | UTR3           | PCDHB9    | NA                      | NA                                                            | NA                               | rs2907326   | NA |
| chr5 | 1.49E+08 | 1.49E+08 | C        | G    | ncRNA_exonic   | MIR143HG  | NA                      | NA                                                            | NA                               | rs519814    | NA |
| chr5 | 1.49E+08 | 1.49E+08 | C        | A    | downstream     | CSNK1A1   | NA                      | NA                                                            | NA                               | NA          | NA |
| chr5 | 1.49E+08 | 1.49E+08 | G        | A    | downstream     | CSNK1A1   | NA                      | NA                                                            | NA                               | NA          | NA |
| chr5 | 1.49E+08 | 1.49E+08 | C        | T    | exonic         | ARHGEF37  | nonsynonymous SNV       | ARHGEF37:NM_001001669:exon11:c.C1466T:p.P489L                 | NA                               | rs9324624   | D  |
| chr5 | 1.49E+08 | 1.49E+08 | C        | T    | UTR3           | PDE6A     | NA                      | NA                                                            | NA                               | rs72660270  | NA |
| chr5 | 1.49E+08 | 1.49E+08 | C        | T    | UTR3           | PDE6A     | NA                      | NA                                                            | NA                               | rs888895    | NA |
| chr5 | 1.5E+08  | 1.5E+08  | T        | G    | UTR5           | TCOF1     | NA                      | NA                                                            | NA                               | rs4565199   | NA |
| chr5 | 1.5E+08  | 1.5E+08  | A        | T    | UTR3           | SYNPO     | NA                      | NA                                                            | NA                               | NA          | NA |
| chr5 | 1.51E+08 | 1.51E+08 | T        | C    | UTR3           | SLC36A2   | NA                      | NA                                                            | NA                               | rs364420    | NA |
| chr5 | 1.51E+08 | 1.51E+08 | -        | AAT  | UTR3           | SLC36A2   | NA                      | NA                                                            | NA                               | rs10681775  | NA |
| chr5 | 1.51E+08 | 1.51E+08 | -        | A    | UTR3           | SLC36A2   | NA                      | NA                                                            | NA                               | rs33912867  | NA |
| chr5 | 1.52E+08 | 1.52E+08 | -        | A    | UTR3           | NMUR2     | NA                      | NA                                                            | NA                               | NA          | NA |
| chr5 | 1.56E+08 | 1.56E+08 | -        | GTT  | exonic         | HAVCR1    | nonframeshift insertion | ,HAVCR1:NM_001099414:exon4:c.477_478insAAC:p.T159delinsTT,HA' | NA                               | rs139041445 | NA |
| chr5 | 1.56E+08 | 1.56E+08 | C        | G    | UTR5           | HAVCR1    | NA                      | NA                                                            | NA                               | rs9313422   | NA |
| chr5 | 1.57E+08 | 1.57E+08 | -        | A    | UTR3           | CYFIP2    | NA                      | NA                                                            | NA                               | NA          | NA |



|      |          |          |         |      |                |                              |                        |                                                                                     |                                    |             |    |
|------|----------|----------|---------|------|----------------|------------------------------|------------------------|-------------------------------------------------------------------------------------|------------------------------------|-------------|----|
| chr5 | 1.58E+08 | 1.58E+08 | -       | A    | UTR3           | EBF1                         | NA                     | NA                                                                                  | NA                                 | NA          | NA |
| chr5 | 1.59E+08 | 1.59E+08 | CA      | -    | UTR3           | UBLCP1                       | NA                     | NA                                                                                  | NA                                 | NA          | NA |
| chr5 | 1.61E+08 | 1.61E+08 | -       | T    | UTR3           | GABRB2                       | NA                     | NA                                                                                  | NA                                 | NA          | NA |
| chr5 | 1.62E+08 | 1.62E+08 | C       | T    | exonic         | GABRG2                       | synonymous SNV         | 3T:p.N196N,GABRG2:NM_198903:exon5:c.C588T;p.N196N,GABRG2:NM_198903:exon5:c.C588T    | ID=COSM150008;OCCURENCE=1(stomach) | rs211037    | NA |
| chr5 | 1.68E+08 | 1.68E+08 | C       | A    | ncRNA_exonic   | FBLL1                        | NA                     | NA                                                                                  | NA                                 | rs111777993 | NA |
| chr5 | 1.7E+08  | 1.7E+08  | -       | G    | ncRNA_exonic   | LOC257358                    | NA                     | NA                                                                                  | NA                                 | rs201174922 | NA |
| chr5 | 1.72E+08 | 1.72E+08 | A       | G    | UTR3           | SH3PXD2B                     | NA                     | NA                                                                                  | NA                                 | rs10050631  | NA |
| chr5 | 1.73E+08 | 1.73E+08 | A       | G    | exonic         | BOD1                         | synonymous SNV         | BOD1:NM_138369:exon3:c.T543C;p.S181S                                                | ID=COSM311048;OCCURENCE=1(lung)    | rs77014290  | NA |
| chr5 | 1.76E+08 | 1.76E+08 | T       | G    | UTR3           | EIF4E1B                      | NA                     | NA                                                                                  | NA                                 | NA          | NA |
| chr5 | 1.76E+08 | 1.76E+08 | A       | C    | exonic         | UNC5A                        | nonsynonymous SNV      | UNC5A:NM_133369:exon8:c.A1246C;p.T416P                                              | NA                                 | NA          | B  |
| chr5 | 1.77E+08 | 1.77E+08 | T       | G    | UTR3           | PROP1                        | NA                     | NA                                                                                  | NA                                 | NA          | NA |
| chr6 | 407629   | 407629   | -       | T    | UTR3           | IRF4                         | NA                     | NA                                                                                  | NA                                 | NA          | NA |
| chr6 | 2889933  | 2889933  | A       | -    | UTR3           | SERPINB9                     | NA                     | NA                                                                                  | NA                                 | rs10714355  | NA |
| chr6 | 7249296  | 7249299  | GAGA    | -    | UTR3           | RREB1                        | NA                     | NA                                                                                  | NA                                 | rs66585613  | NA |
| chr6 | 10796303 | 10796303 | T       | G    | exonic         | MAK                          | nonsynonymous SNV      | '1C:p.Q357H,MAK:NM_001242957:exon9:c.A1071C;p.Q357H,MAK:NM_001242957:exon9:c.A1071C | NA                                 | NA          | P  |
| chr6 | 11714197 | 11714197 | -       | A    | UTR3           | ADTRP                        | NA                     | NA                                                                                  | NA                                 | NA          | NA |
| chr6 | 11714639 | 11714639 | G       | A    | UTR3           | ADTRP                        | NA                     | NA                                                                                  | NA                                 | rs200727372 | NA |
| chr6 | 15521323 | 15521323 | G       | A    | UTR3           | JARID2                       | NA                     | NA                                                                                  | NA                                 | NA          | NA |
| chr6 | 17688638 | 17688638 | C       | A    | exonic         | NUP153                       | nonsynonymous SNV      | NUP153:NM_005124:exon2:c.G323T;p.S108I                                              | NA                                 | NA          | B  |
| chr6 | 18129306 | 18129306 | C       | A    | UTR3           | TPMT                         | NA                     | NA                                                                                  | NA                                 | NA          | NA |
| chr6 | 21597697 | 21597697 | C       | T    | UTR3           | SOX4                         | NA                     | NA                                                                                  | NA                                 | NA          | NA |
| chr6 | 21597716 | 21597716 | C       | T    | UTR3           | SOX4                         | NA                     | NA                                                                                  | NA                                 | NA          | NA |
| chr6 | 25769247 | 25769247 | C       | A    | exonic         | SLC17A4                      | synonymous SNV         | SLC17A4:NM_005495:exon3:c.C126A;p.I42I                                              | NA                                 | NA          | NA |
| chr6 | 26525864 | 26525864 | -       | A    | ncRNA_exonic   | HCG11                        | NA                     | NA                                                                                  | NA                                 | rs35998206  | NA |
| chr6 | 29640039 | 29640039 | G       | A    | UTR3           | MOG                          | NA                     | NA                                                                                  | NA                                 | rs1984840   | NA |
| chr6 | 29857177 | 29857177 | G       | A    | ncRNA_exonic   | HLA-H                        | NA                     | NA                                                                                  | NA                                 | rs1059578   | NA |
| chr6 | 29867090 | 29867090 | A       | C    | intergenic     | -H(dist=8234),HCG4B(dist=25) | NA                     | NA                                                                                  | NA                                 | rs9259500   | NA |
| chr6 | 29867345 | 29867345 | -       | CT   | intergenic     | -H(dist=8489),HCG4B(dist=25) | NA                     | NA                                                                                  | NA                                 | rs142277328 | NA |
| chr6 | 29867768 | 29867768 | G       | A    | intergenic     | -H(dist=8912),HCG4B(dist=24) | NA                     | NA                                                                                  | NA                                 | rs3094183   | NA |
| chr6 | 29892568 | 29892568 | C       | A    | ncRNA_exonic   | HCG4B                        | NA                     | NA                                                                                  | NA                                 | NA          | NA |
| chr6 | 29892570 | 29892570 | A       | T    | ncRNA_exonic   | HCG4B                        | NA                     | NA                                                                                  | NA                                 | NA          | NA |
| chr6 | 29912149 | 29912149 | G       | C    | exonic         | HLA-A                        | synonymous SNV         | _001242758:exon4:c.G870C;p.L290L,HLA-A:NM_002116:exon4:c.G870C                      | NA                                 | rs1136832   | NA |
| chr6 | 30232436 | 30232436 | G       | A    | ncRNA_exonic   | HLA-L                        | NA                     | NA                                                                                  | NA                                 | rs3094630   | NA |
| chr6 | 30232545 | 30232548 | AGAA    | -    | ncRNA_exonic   | HLA-L                        | NA                     | NA                                                                                  | NA                                 | rs144443573 | NA |
| chr6 | 30233356 | 30233356 | -       | TTTA | ncRNA_exonic   | HLA-L                        | NA                     | NA                                                                                  | NA                                 | rs148801141 | NA |
| chr6 | 30672634 | 30672634 | C       | G    | exonic         | MDC1                         | synonymous SNV         | MDC1:NM_014641:exon10:c.G4326C;p.V1442V                                             | NA                                 | NA          | NA |
| chr6 | 30673064 | 30673064 | C       | T    | exonic         | MDC1                         | nonsynonymous SNV      | MDC1:NM_014641:exon10:c.G3896A;p.R1299Q                                             | NA                                 | rs144657716 | NA |
| chr6 | 30673422 | 30673422 | A       | G    | exonic         | MDC1                         | nonsynonymous SNV      | MDC1:NM_014641:exon10:c.T3538C;p.S1180P                                             | NA                                 | rs9461623   | P  |
| chr6 | 30673432 | 30673432 | C       | T    | exonic         | MDC1                         | synonymous SNV         | MDC1:NM_014641:exon10:c.G3528A;p.Q1176Q                                             | NA                                 | rs78306040  | NA |
| chr6 | 30918208 | 30918208 | T       | C    | exonic         | DPCR1                        | nonsynonymous SNV      | DPCR1:NM_080870:exon2:c.T1967C;p.F656S                                              | NA                                 | NA          | NA |
| chr6 | 30918690 | 30918690 | T       | C    | exonic         | DPCR1                        | nonsynonymous SNV      | DPCR1:NM_080870:exon2:c.T2449C;p.S817P                                              | NA                                 | NA          | NA |
| chr6 | 30919155 | 30919155 | G       | A    | exonic         | DPCR1                        | nonsynonymous SNV      | DPCR1:NM_080870:exon2:c.G2914A;p.D972N                                              | NA                                 | rs185499634 | NA |
| chr6 | 30954600 | 30954600 | A       | C    | exonic         | MUC21                        | nonsynonymous SNV      | MUC21:NM_001010909:exon2:c.A648C;p.R216S                                            | NA                                 | NA          | NA |
| chr6 | 30954611 | 30954611 | A       | G    | exonic         | MUC21                        | nonsynonymous SNV      | MUC21:NM_001010909:exon2:c.A659G;p.N220S                                            | NA                                 | rs202115956 | NA |
| chr6 | 30954618 | 30954618 | T       | C    | exonic         | MUC21                        | synonymous SNV         | MUC21:NM_001010909:exon2:c.T666C;p.A222A                                            | NA                                 | NA          | NA |
| chr6 | 30955127 | 30955127 | C       | A    | exonic         | MUC21                        | nonsynonymous SNV      | MUC21:NM_001010909:exon2:c.C1175A;p.T392N                                           | NA                                 | rs9262397   | NA |
| chr6 | 31022557 | 31022557 | G       | A    | ncRNA_intronic | HCG22                        | NA                     | NA                                                                                  | NA                                 | rs2523853   | NA |
| chr6 | 31024175 | 31024175 | T       | C    | ncRNA_exonic   | HCG22                        | NA                     | NA                                                                                  | NA                                 | rs117227928 | NA |
| chr6 | 31025713 | 31025713 | C       | A    | ncRNA_intronic | HCG22                        | NA                     | NA                                                                                  | NA                                 | rs2517524   | NA |
| chr6 | 31133943 | 31133943 | C       | A    | UTR5           | POU5F1                       | NA                     | NA                                                                                  | NA                                 | rs3130932   | NA |
| chr6 | 31141612 | 31141612 | A       | T    | ncRNA_exonic   | PSORS1C3                     | NA                     | NA                                                                                  | NA                                 | rs2269711   | NA |
| chr6 | 31324525 | 31324525 | C       | T    | exonic         | HLA-B                        | nonsynonymous SNV      | HLA-B:NM_005514:exon2:c.G283A;p.A95T                                                | NA                                 | rs1131213   | NA |
| chr6 | 31324526 | 31324526 | C       | G    | exonic         | HLA-B                        | nonsynonymous SNV      | HLA-B:NM_005514:exon2:c.G282C;p.Q94H                                                | NA                                 | rs1131212   | NA |
| chr6 | 31324528 | 31324528 | G       | T    | exonic         | HLA-B                        | nonsynonymous SNV      | HLA-B:NM_005514:exon2:c.C280A;p.Q94K                                                | NA                                 | rs1071817   | NA |
| chr6 | 31324531 | 31324531 | C       | T    | exonic         | HLA-B                        | nonsynonymous SNV      | HLA-B:NM_005514:exon2:c.G277A;p.A93T                                                | NA                                 | rs1131204   | NA |
| chr6 | 31324536 | 31324536 | T       | G    | exonic         | HLA-B                        | nonsynonymous SNV      | HLA-B:NM_005514:exon2:c.A272C;p.Y91S                                                | NA                                 | rs1071816   | NA |
| chr6 | 31324547 | 31324547 | G       | C    | exonic         | HLA-B                        | nonsynonymous SNV      | HLA-B:NM_005514:exon2:c.C261G;p.N87K                                                | NA                                 | rs151341177 | NA |
| chr6 | 31324549 | 31324549 | T       | C    | exonic         | HLA-B                        | nonsynonymous SNV      | HLA-B:NM_005514:exon2:c.A259G;p.N87D                                                | NA                                 | rs143633217 | NA |
| chr6 | 31324586 | 31324586 | C       | T    | exonic         | HLA-B                        | synonymous SNV         | HLA-B:NM_005514:exon2:c.G222A;p.P74P                                                | NA                                 | rs139850307 | NA |
| chr6 | 31465899 | 31465899 | G       | C    | UTR5           | MICB                         | NA                     | NA                                                                                  | NA                                 | rs2516498   | NA |
| chr6 | 31465905 | 31465905 | G       | T    | UTR5           | MICB                         | NA                     | NA                                                                                  | NA                                 | rs2516497   | NA |
| chr6 | 31465915 | 31465915 | G       | C    | UTR5           | MICB                         | NA                     | NA                                                                                  | NA                                 | rs3828916   | NA |
| chr6 | 31595773 | 31595784 | TGCTGCC | -    | exonic         | PRRC2A                       | nonframeshift deletion | n12:c.1522_1533del;p.508_511del,PRRC2A:NM_080686:exon12:c.1522_1533del              | NA                                 | rs149965706 | NA |
| chr6 | 31976161 | 31976161 | A       | G    | exonic         | CYP21A2                      | unknown                | UNKNOWN                                                                             | NA                                 | rs200893608 | NA |
| chr6 | 32548550 | 32548550 | G       | A    | exonic         | HLA-DRB1                     | synonymous SNV         | HLA-DRB1:NM_002124:exon4:c.C736T;p.L246L                                            | NA                                 | rs1059362   | NA |
| chr6 | 32549596 | 32549596 | T       | C    | exonic         | HLA-DRB1                     | synonymous SNV         | HLA-DRB1:NM_002124:exon3:c.A390G;p.V130V                                            | NA                                 | rs111823233 | NA |

|      |          |          |          |           |                |                             |                   |                                                               |                                  |             |    |
|------|----------|----------|----------|-----------|----------------|-----------------------------|-------------------|---------------------------------------------------------------|----------------------------------|-------------|----|
| chr6 | 32557504 | 32557504 | G        | A         | exonic         | HLA-DRB1                    | nonsynonymous SNV | HLA-DRB1:NM_002124:exon1:c.C16T:p.L6F                         | NA                               | rs17879020  | NA |
| chr6 | 32605234 | 32605234 | G        | A         | UTR5           | HLA-DQA1                    | NA                | NA                                                            | NA                               | rs1047987   | NA |
| chr6 | 32845561 | 32845561 | A        | -         | intergenic     | ist=17933),LOC100294145(dis | NA                | NA                                                            | NA                               | rs34093445  | NA |
| chr6 | 32846167 | 32846167 | C        | T         | intergenic     | ist=18539),LOC100294145(dis | NA                | NA                                                            | NA                               | NA          | NA |
| chr6 | 33032968 | 33032968 | G        | A         | UTR3           | HLA-DPA1                    | NA                | NA                                                            | NA                               | rs8486      | NA |
| chr6 | 33054353 | 33054353 | G        | A         | UTR3           | HLA-DPB1                    | NA                | NA                                                            | NA                               | rs9277522   | NA |
| chr6 | 33054355 | 33054355 | A        | C         | UTR3           | HLA-DPB1                    | NA                | NA                                                            | NA                               | rs9277523   | NA |
| chr6 | 33179668 | 33179668 | T        | G         | exonic         | RING1                       | synonymous SNV    | RING1:NM_002931:exon6:c.T1008G:p.G336G                        | NA                               | rs117630006 | NA |
| chr6 | 33422545 | 33422545 | C        | G         | UTR5           | ZBTB9                       | NA                | NA                                                            | NA                               | rs2274730   | NA |
| chr6 | 36853786 | 36853786 | -        | G         | UTR5           | C6orf89                     | NA                | NA                                                            | NA                               | NA          | NA |
| chr6 | 36995222 | 36995222 | G        | A         | exonic         | FGD2                        | synonymous SNV    | FGD2:NM_173558:exon15:c.G1623A:p.T541T                        | NA                               | rs2274587   | NA |
| chr6 | 36995281 | 36995281 | G        | A         | exonic         | FGD2                        | nonsynonymous SNV | FGD2:NM_173558:exon15:c.G1682A:p.S561N                        | NA                               | rs148473105 | B  |
| chr6 | 38139332 | 38139333 | TGTGTGTG | -         | UTR3           | BTBD9                       | NA                | NA                                                            | NA                               | rs72137261  | NA |
| chr6 | 38140548 | 38140548 | G        | A         | UTR3           | BTBD9                       | NA                | NA                                                            | NA                               | NA          | NA |
| chr6 | 39053943 | 39053948 | ACACAC   | -         | UTR3           | GLP1R                       | NA                | NA                                                            | NA                               | NA          | NA |
| chr6 | 39284184 | 39284184 | A        | G         | exonic         | KCNK16                      | synonymous SNV    | _001135106:exon5:c.T696C;p.Y232Y,KCNK16:NM_032115:exon5:c.T6  | NA                               | rs3734618   | NA |
| chr6 | 40360273 | 40360273 | C        | T         | exonic         | LRFN2                       | synonymous SNV    | LRFN2:NM_020737:exon3:c.G1779A:p.G593G                        | NA                               | NA          | NA |
| chr6 | 41090722 | 41090722 | C        | A         | ncRNA_exonic   | ADCY10P1                    | NA                | NA                                                            | NA                               | NA          | NA |
| chr6 | 41158908 | 41158909 | TG       | -         | UTR3           | TREML2                      | NA                | NA                                                            | NA                               | NA          | NA |
| chr6 | 42931628 | 42931631 | TTTA     | -         | UTR3           | PEX6                        | NA                | NA                                                            | NA                               | rs144286892 | NA |
| chr6 | 42946943 | 42946943 | G        | A         | UTR5           | PEX6                        | NA                | NA                                                            | NA                               | rs9462859   | NA |
| chr6 | 43584152 | 43584152 | A        | G         | UTR3           | POLH                        | NA                | NA                                                            | NA                               | rs9472090   | NA |
| chr6 | 45517740 | 45517740 | T        | -         | UTR3           | RUNX2                       | NA                | NA                                                            | NA                               | rs11320232  | NA |
| chr6 | 45868268 | 45868268 | -        | AAAAAAAAA | UTR3           | CLIC5                       | NA                | NA                                                            | NA                               | NA          | NA |
| chr6 | 46672210 | 46672221 | CTCTCACA | -         | UTR3           | PLA2G7                      | NA                | NA                                                            | NA                               | rs144459411 | NA |
| chr6 | 47445789 | 47445789 | A        | C         | UTR5           | CD2AP                       | NA                | NA                                                            | NA                               | rs1056434   | NA |
| chr6 | 47792560 | 47792560 | T        | -         | UTR3           | OPN5                        | NA                | NA                                                            | NA                               | NA          | NA |
| chr6 | 49460746 | 49460746 | C        | A         | UTR3           | CENPQ                       | NA                | NA                                                            | NA                               | NA          | NA |
| chr6 | 49460762 | 49460762 | G        | T         | UTR3           | CENPQ                       | NA                | NA                                                            | NA                               | NA          | NA |
| chr6 | 52272471 | 52272471 | C        | A         | UTR3           | PAQR8                       | NA                | NA                                                            | NA                               | rs2397089   | NA |
| chr6 | 52362410 | 52362410 | T        | G         | UTR3           | TRAM2                       | NA                | NA                                                            | NA                               | NA          | NA |
| chr6 | 52362424 | 52362424 | G        | T         | UTR3           | TRAM2                       | NA                | NA                                                            | NA                               | NA          | NA |
| chr6 | 52365317 | 52365317 | T        | G         | UTR3           | TRAM2                       | NA                | NA                                                            | NA                               | rs9395798   | NA |
| chr6 | 56033094 | 56033094 | G        | A         | exonic         | COL21A1                     | nonsynonymous SNV | COL21A1:NM_030820:exon6:c.C1028T:p.T343M                      | NA                               | rs35471617  | NA |
| chr6 | 57393144 | 57393144 | A        | T         | exonic         | PRIM2                       | unknown           | UNKNOWN                                                       | =COSM1131820;OCCURENCE=1(prostat | rs3763183   | NA |
| chr6 | 57398207 | 57398207 | G        | T         | exonic         | PRIM2                       | unknown           | UNKNOWN                                                       |                                  | rs71214816  | NA |
| chr6 | 57512841 | 57512841 | A        | G         | UTR3           | PRIM2                       | NA                | NA                                                            | NA                               | rs78256005  | NA |
| chr6 | 57512850 | 57512850 | C        | G         | UTR3           | PRIM2                       | NA                | NA                                                            | NA                               | rs77911716  | NA |
| chr6 | 57512889 | 57512889 | C        | T         | UTR3           | PRIM2                       | NA                | NA                                                            | NA                               | rs75351177  | NA |
| chr6 | 57512902 | 57512902 | G        | A         | UTR3           | PRIM2                       | NA                | NA                                                            | NA                               | rs77563921  | NA |
| chr6 | 57512916 | 57512916 | -        | T         | UTR3           | PRIM2                       | NA                | NA                                                            | NA                               | rs200683929 | NA |
| chr6 | 57512933 | 57512933 | G        | A         | UTR3           | PRIM2                       | NA                | NA                                                            | NA                               | rs77947729  | NA |
| chr6 | 57513082 | 57513082 | C        | T         | UTR3           | PRIM2                       | NA                | NA                                                            | NA                               | rs75390508  | NA |
| chr6 | 57513140 | 57513140 | -        | AACA      | UTR3           | PRIM2                       | NA                | NA                                                            | NA                               | rs56224260  | NA |
| chr6 | 57513160 | 57513160 | G        | A         | UTR3           | PRIM2                       | NA                | NA                                                            | NA                               | rs76503032  | NA |
| chr6 | 57513205 | 57513205 | C        | T         | UTR3           | PRIM2                       | NA                | NA                                                            | NA                               | rs74617308  | NA |
| chr6 | 57513292 | 57513292 | C        | T         | UTR3           | PRIM2                       | NA                | NA                                                            | NA                               | rs79506978  | NA |
| chr6 | 57513366 | 57513366 | A        | G         | UTR3           | PRIM2                       | NA                | NA                                                            | NA                               | rs74652947  | NA |
| chr6 | 70917069 | 70917070 | TT       | -         | UTR3           | COL19A1                     | NA                | NA                                                            | NA                               | NA          | NA |
| chr6 | 71666227 | 71666227 | G        | A         | UTR5           | B3GAT2                      | NA                | NA                                                            | NA                               | rs9446313   | NA |
| chr6 | 73907362 | 73907362 | A        | C         | UTR3           | KCNQ5                       | NA                | NA                                                            | NA                               | rs10943079  | NA |
| chr6 | 74536576 | 74536576 | -        | T         | UTR3           | CD109                       | NA                | NA                                                            | NA                               | rs11451739  | NA |
| chr6 | 76640781 | 76640781 | C        | T         | exonic         | IMPG1                       | nonsynonymous SNV | IMPG1:NM_001563:exon15:c.G2132A:p.R711H                       | NA                               | rs3734313   | D  |
| chr6 | 80411320 | 80411320 | T        | -         | UTR3           | SH3BGRL2                    | NA                | NA                                                            | NA                               | NA          | NA |
| chr6 | 83074365 | 83074365 | C        | T         | UTR5           | TPBG                        | NA                | NA                                                            | NA                               | rs770911    | NA |
| chr6 | 90346603 | 90346603 | C        | T         | UTR3           | LYRM2                       | NA                | NA                                                            | NA                               | rs1134136   | NA |
| chr6 | 97592002 | 97592005 | AAAG     | -         | ncRNA_UTR3     | MMS22L                      | NA                | NA                                                            | NA                               | NA          | NA |
| chr6 | 97592005 | 97592008 | GAGA     | -         | ncRNA_UTR3     | MMS22L                      | NA                | NA                                                            | NA                               | NA          | NA |
| chr6 | 99724024 | 99724024 | A        | -         | UTR3           | FAXC                        | NA                | NA                                                            | NA                               | rs11307978  | NA |
| chr6 | 1.06E+08 | 1.06E+08 | A        | G         | UTR3           | BVES                        | NA                | NA                                                            | NA                               | rs7771833   | NA |
| chr6 | 1.07E+08 | 1.07E+08 | C        | A         | UTR3           | PRDM1                       | NA                | NA                                                            | NA                               | NA          | NA |
| chr6 | 1.07E+08 | 1.07E+08 | C        | T         | UTR3           | PRDM1                       | NA                | NA                                                            | NA                               | NA          | NA |
| chr6 | 1.07E+08 | 1.07E+08 | T        | C         | ncRNA_intronic | LOC100422737                | NA                | NA                                                            | NA                               | rs3117417   | NA |
| chr6 | 1.07E+08 | 1.07E+08 | A        | -         | UTR3           | BEND3                       | NA                | NA                                                            | NA                               | NA          | NA |
| chr6 | 1.1E+08  | 1.1E+08  | T        | C         | exonic         | PPIL6                       | nonsynonymous SNV | _001111298:exon3:c.A329G;p.H110R,PPIL6:NM_173672:exon3:c.A329 | NA                               | rs9398200   | P  |
| chr6 | 1.1E+08  | 1.1E+08  | G        | A         | UTR5           | PPIL6,SMPD2                 | NA                | NA                                                            | NA                               | rs1048203   | NA |

|      |          |          |          |      |              |               |                   |                                                                                              |                                      |             |    |
|------|----------|----------|----------|------|--------------|---------------|-------------------|----------------------------------------------------------------------------------------------|--------------------------------------|-------------|----|
| chr6 | 1.14E+08 | 1.14E+08 | T        | -    | UTR3         | MARCKS        | NA                | NA                                                                                           | NA                                   | NA          | NA |
| chr6 | 1.32E+08 | 1.32E+08 | C        | G    | exonic       | ARG1          | nonsynonymous SNV | M_000045:exon2:c.C82G:p.P28A,ARG1:NM_001244438:exon2:c.C82G                                  | NA                                   | NA          | P  |
| chr6 | 1.36E+08 | 1.36E+08 | C        | A    | UTR5         | AHI1          | NA                | NA                                                                                           | NA                                   | rs13197384  | NA |
| chr6 | 1.37E+08 | 1.37E+08 | AA       | -    | UTR3         | PDE7B         | NA                | NA                                                                                           | NA                                   | NA          | NA |
| chr6 | 1.37E+08 | 1.37E+08 | T        | C    | UTR3         | BCLAF1        | NA                | NA                                                                                           | NA                                   | rs74299323  | NA |
| chr6 | 1.39E+08 | 1.39E+08 | A        | -    | UTR3         | KIAA1244      | NA                | NA                                                                                           | NA                                   | NA          | NA |
| chr6 | 1.44E+08 | 1.44E+08 | C        | T    | UTR3         | ADAT2         | NA                | NA                                                                                           | NA                                   | rs9484744   | NA |
| chr6 | 1.44E+08 | 1.44E+08 | T        | -    | UTR3         | PHACTR2       | NA                | NA                                                                                           | NA                                   | NA          | NA |
| chr6 | 1.44E+08 | 1.44E+08 | A        | T    | ncRNA_exonic | HYMAI         | NA                | NA                                                                                           | NA                                   | rs1474882   | NA |
| chr6 | 1.45E+08 | 1.45E+08 | C        | T    | UTR3         | STX11         | NA                | NA                                                                                           | NA                                   | rs148087652 | NA |
| chr6 | 1.51E+08 | 1.51E+08 | G        | -    | UTR3         | PPP1R14C      | NA                | NA                                                                                           | NA                                   | rs201167515 | NA |
| chr6 | 1.53E+08 | 1.53E+08 | T        | C    | exonic       | MTRF1L        | nonsynonymous SNV | 1_001114184:exon1:c.A112G:p.T38A,MTRF1L:NM_019041:exon1:c.A1                                 | NA                                   | rs3818125   | B  |
| chr6 | 1.56E+08 | 1.56E+08 | AA       | -    | UTR3         | TFB1M,TIAM2   | NA                | NA                                                                                           | NA                                   | rs139032680 | NA |
| chr6 | 1.58E+08 | 1.58E+08 | C        | T    | UTR3         | ARID1B        | NA                | NA                                                                                           | NA                                   | NA          | NA |
| chr6 | 1.59E+08 | 1.59E+08 | A        | -    | UTR3         | GTF2H5        | NA                | NA                                                                                           | NA                                   | rs3841147   | NA |
| chr6 | 1.59E+08 | 1.59E+08 | T        | -    | UTR3         | GTF2H5        | NA                | NA                                                                                           | NA                                   | NA          | NA |
| chr6 | 1.59E+08 | 1.59E+08 | A        | C    | exonic       | TULP4         | nonsynonymous SNV | TULP4:NM_020245:exon13:c.A2306C:p.N769T                                                      | ID=COSM400671;OCCURENCE=1(lung)      | NA          | B  |
| chr6 | 1.6E+08  | 1.6E+08  | A        | G    | exonic       | SOD2          | nonsynonymous SNV | 7C:p.V16A,SOD2:NM_001024465:exon2:c.T47C:p.V16A,SOD2:NM_00                                   | NA                                   | rs4880      | NA |
| chr6 | 1.6E+08  | 1.6E+08  | G        | T    | UTR3         | WTAP          | NA                | NA                                                                                           | NA                                   | NA          | NA |
| chr6 | 1.6E+08  | 1.6E+08  | G        | T    | UTR3         | WTAP          | NA                | NA                                                                                           | NA                                   | NA          | NA |
| chr6 | 1.61E+08 | 1.61E+08 | A        | -    | ncRNA_exonic | LOC729603     | NA                | NA                                                                                           | NA                                   | NA          | NA |
| chr6 | 1.61E+08 | 1.61E+08 | TG       | -    | UTR3         | IGF2R         | NA                | NA                                                                                           | NA                                   | NA          | NA |
| chr6 | 1.61E+08 | 1.61E+08 | C        | A    | exonic       | MAP3K4        | nonsynonymous SNV | _005922:exon4:c.C1909A:p.Q637K,MAP3K4:NM_006724:exon4:c.C19                                  | NA                                   | NA          | D  |
| chr6 | 1.64E+08 | 1.64E+08 | A        | C    | UTR3         | QKI           | NA                | NA                                                                                           | NA                                   | NA          | NA |
| chr6 | 1.68E+08 | 1.68E+08 | C        | T    | ncRNA_exonic | MLLT4-AS1     | NA                | NA                                                                                           | NA                                   | rs112715448 | NA |
| chr6 | 1.68E+08 | 1.68E+08 | A        | C    | ncRNA_exonic | MLLT4-AS1     | NA                | NA                                                                                           | NA                                   | NA          | NA |
| chr6 | 1.68E+08 | 1.68E+08 | A        | C    | ncRNA_exonic | MLLT4-AS1     | NA                | NA                                                                                           | NA                                   | NA          | NA |
| chr6 | 1.68E+08 | 1.68E+08 | TG       | -    | UTR3         | MLLT4         | NA                | NA                                                                                           | NA                                   | NA          | NA |
| chr6 | 1.68E+08 | 1.68E+08 | C        | T    | exonic       | HGC6.3        | nonsynonymous SNV | HGC6.3:NM_001129895:exon1:c.G464A:p.G155E                                                    | NA                                   | rs201374833 | NA |
| chr6 | 1.68E+08 | 1.68E+08 | A        | G    | exonic       | HGC6.3        | nonsynonymous SNV | HGC6.3:NM_001129895:exon1:c.T230C:p.F77S                                                     | NA                                   | NA          | NA |
| chr6 | 1.68E+08 | 1.68E+08 | A        | T    | exonic       | KIF25         | nonsynonymous SNV | NM_005355:exon2:c.A83T:p.K28M,KIF25:NM_030615:exon2:c.A83T:p                                 | NA                                   | rs4708626   | B  |
| chr6 | 1.71E+08 | 1.71E+08 | G        | A    | exonic       | FAM120B       | nonsynonymous SNV | FAM120B:NM_032448:exon2:c.G1088A:p.R363Q                                                     | NA                                   | NA          | B  |
| chr6 | 1.71E+08 | 1.71E+08 | G        | A    | exonic       | TBP           | synonymous SNV    | _001172085:exon2:c.G168A:p.Q56Q,TBP:NM_003194:exon3:c.G228A)SM247746;OCCURENCE=1(prostate),3 | rs112083427                          | NA          | NA |
| chr7 | 537549   | 537549   | G        | A    | UTR3         | PDGFA         | NA                | NA                                                                                           | NA                                   | NA          | NA |
| chr7 | 537550   | 537550   | G        | A    | UTR3         | PDGFA         | NA                | NA                                                                                           | NA                                   | NA          | NA |
| chr7 | 537959   | 537959   | T        | C    | UTR3         | PDGFA         | NA                | NA                                                                                           | NA                                   | rs77670994  | NA |
| chr7 | 5516293  | 5516293  | T        | C    | UTR3         | FBXL18        | NA                | NA                                                                                           | NA                                   | rs12535397  | NA |
| chr7 | 5517337  | 5517337  | A        | -    | UTR3         | FBXL18        | NA                | NA                                                                                           | NA                                   | NA          | NA |
| chr7 | 5886611  | 5886611  | C        | G    | ncRNA_exonic | ZNF815P       | NA                | NA                                                                                           | NA                                   | rs308084    | NA |
| chr7 | 6193464  | 6193464  | T        | G    | exonic       | USP42         | nonsynonymous SNV | USP42:NM_032172:exon15:c.T2279G:p.L760R                                                      | NA                                   | rs61732616  | NA |
| chr7 | 6442143  | 6442143  | C        | -    | UTR3         | RAC1          | NA                | NA                                                                                           | NA                                   | rs59685280  | NA |
| chr7 | 6566322  | 6566322  | T        | G    | exonic       | GRID2IP       | synonymous SNV    | GRID2IP:NM_001145118:exon3:c.A663C:p.A221A                                                   | NA                                   | rs2881723   | NA |
| chr7 | 20180426 | 20180427 | AC       | -    | UTR3         | MACC1         | NA                | NA                                                                                           | NA                                   | rs10555255  | NA |
| chr7 | 20796144 | 20796144 | G        | T    | UTR3         | ABCB5         | NA                | NA                                                                                           | NA                                   | rs12112555  | NA |
| chr7 | 21941862 | 21941865 | TCTT     | -    | UTR3         | CDCA7L        | NA                | NA                                                                                           | NA                                   | rs60370798  | NA |
| chr7 | 22158512 | 22158512 | C        | A    | UTR3         | RAPGEF5       | NA                | NA                                                                                           | NA                                   | NA          | NA |
| chr7 | 23749892 | 23749892 | C        | G    | UTR5         | STK31         | NA                | NA                                                                                           | NA                                   | NA          | NA |
| chr7 | 26252966 | 26252966 | C        | T    | UTR3         | CBX3          | NA                | NA                                                                                           | NA                                   | rs28407029  | NA |
| chr7 | 27147452 | 27147453 | AA       | -    | UTR3         | HOXA3         | NA                | NA                                                                                           | NA                                   | NA          | NA |
| chr7 | 29687058 | 29687058 | T        | G    | ncRNA_exonic | LOC646762     | NA                | NA                                                                                           | NA                                   | rs28457783  | NA |
| chr7 | 29687091 | 29687091 | C        | T    | ncRNA_exonic | LOC646762     | NA                | NA                                                                                           | NA                                   | rs28390296  | NA |
| chr7 | 29687927 | 29687927 | T        | C    | ncRNA_exonic | LOC646762     | NA                | NA                                                                                           | NA                                   | rs1728641   | NA |
| chr7 | 29923572 | 29923572 | T        | C    | exonic       | WIPF3         | synonymous SNV    | WIPF3:NM_001080529:exon5:c.T462C:p.N154N                                                     | NA                                   | rs28439342  | NA |
| chr7 | 30412409 | 30412409 | A        | -    | ncRNA_exonic | DKFZP58611420 | NA                | NA                                                                                           | NA                                   | NA          | NA |
| chr7 | 30796018 | 30796018 | -        | TTTT | ncRNA_UTR3   | INMT          | NA                | NA                                                                                           | NA                                   | NA          | NA |
| chr7 | 30796273 | 30796273 | T        | C    | ncRNA_UTR3   | INMT          | NA                | NA                                                                                           | NA                                   | rs7787251   | NA |
| chr7 | 32525555 | 32525556 | AA       | -    | UTR3         | LSM5          | NA                | NA                                                                                           | NA                                   | rs10598963  | NA |
| chr7 | 35734529 | 35734529 | C        | G    | UTR5         | HERPUD2       | NA                | NA                                                                                           | NA                                   | rs78381277  | NA |
| chr7 | 35734591 | 35734591 | -        | G    | UTR5         | HERPUD2       | NA                | NA                                                                                           | NA                                   | rs11394396  | NA |
| chr7 | 37960263 | 37960275 | 3CAGTGGC | -    | UTR5         | EPDR1         | NA                | NA                                                                                           | 468;OCCURENCE=1(ovary),1(breast),1(t | rs201513905 | NA |
| chr7 | 38725735 | 38725735 | A        | C    | ncRNA_exonic | FAM183B       | NA                | NA                                                                                           | NA                                   | NA          | NA |
| chr7 | 41729121 | 41729121 | -        | T    | UTR3         | INHBA         | NA                | NA                                                                                           | NA                                   | NA          | NA |
| chr7 | 42001570 | 42001570 | A        | -    | UTR3         | GLI3          | NA                | NA                                                                                           | NA                                   | rs144064690 | NA |
| chr7 | 43590153 | 43590153 | T        | G    | exonic       | HECW1         | nonsynonymous SNV | HECW1:NM_015052:exon27:c.T4358G:p.V1453G                                                     | NA                                   | NA          | P  |
| chr7 | 44073817 | 44073817 | A        | G    | ncRNA_exonic | RASA4CP       | NA                | NA                                                                                           | NA                                   | NA          | NA |
| chr7 | 44073823 | 44073823 | T        | C    | ncRNA_exonic | RASA4CP       | NA                | NA                                                                                           | NA                                   | NA          | NA |

|      |          |          |      |   |              |         |                     |                                                               |                                 |             |    |
|------|----------|----------|------|---|--------------|---------|---------------------|---------------------------------------------------------------|---------------------------------|-------------|----|
| chr7 | 44258882 | 44258882 | G    | T | UTR3         | CAMK2B  | NA                  | NA                                                            | NA                              | rs113136811 | NA |
| chr7 | 44258923 | 44258923 | G    | T | UTR3         | CAMK2B  | NA                  | NA                                                            | NA                              | NA          | NA |
| chr7 | 44873374 | 44873374 | C    | T | UTR3         | H2AFV   | NA                  | NA                                                            | NA                              | rs36047398  | NA |
| chr7 | 44917408 | 44917408 | A    | - | UTR3         | PURB    | NA                  | NA                                                            | NA                              | NA          | NA |
| chr7 | 45123081 | 45123081 | C    | G | exonic       | NACAD   | nonsynonymous SNV   | NACAD:NM_001146334:exon2:c.G2698C:p.V900L                     | NA                              | NA          | NA |
| chr7 | 45123337 | 45123337 | C    | T | exonic       | NACAD   | synonymous SNV      | NACAD:NM_001146334:exon2:c.G2442A:p.S814S                     | NA                              | rs61740885  | NA |
| chr7 | 45123379 | 45123379 | G    | A | exonic       | NACAD   | synonymous SNV      | NACAD:NM_001146334:exon2:c.C2400T:p.S800S                     | NA                              | NA          | NA |
| chr7 | 47568718 | 47568718 | C    | T | UTR5         | TNS3    | NA                  | NA                                                            | NA                              | rs10261525  | NA |
| chr7 | 51261280 | 51261280 | C    | T | exonic       | COBL    | synonymous SNV      | COBL:NM_015198:exon3:c.G252A:p.A84A                           | NA                              | rs1437488   | NA |
| chr7 | 64436818 | 64436818 | -    | A | UTR3         | ZNF117  | NA                  | NA                                                            | NA                              | NA          | NA |
| chr7 | 65171393 | 65171393 | G    | A | ncRNA_exonic | INTS4L2 | NA                  | NA                                                            | NA                              | rs12532775  | NA |
| chr7 | 66774667 | 66774667 | G    | T | ncRNA_exonic | STAG3L4 | NA                  | NA                                                            | NA                              | NA          | NA |
| chr7 | 72336469 | 72336469 | T    | - | ncRNA_exonic | SPDYE7P | NA                  | NA                                                            | NA                              | rs58909282  | NA |
| chr7 | 72338105 | 72338105 | A    | - | ncRNA_exonic | SPDYE7P | NA                  | NA                                                            | NA                              | NA          | NA |
| chr7 | 72413581 | 72413581 | G    | A | exonic       | POM121  | nonsynonymous SNV   | .72020:exon11:c.G2254A:p.V752I,POM121:NM_001257190:exon14:c.C | NA                              | rs71554687  | B  |
| chr7 | 76131725 | 76131725 | T    | C | exonic       | DTX2    | synonymous SNV      | 001102595:exon7:c.T1341C:p.H447H,DTX2:NM_001102594:exon8:c.T: | NA                              | NA          | NA |
| chr7 | 77558429 | 77558429 | G    | T | exonic       | PHTF2   | nonsynonymous SNV   | .A337S,PHTF2:NM_001127357:exon10:c.G1021T:p.A341S,PHTF2:NM_   | NA                              | NA          | NA |
| chr7 | 92088538 | 92088538 | -    | A | UTR3         | GATAD1  | NA                  | NA                                                            | NA                              | NA          | NA |
| chr7 | 92985252 | 92985252 | T    | C | exonic       | CCDC132 | synonymous SNV      | 017667:exon27:c.T2635C:p.L879L,CCDC132:NM_001257998:exon28:c: | NA                              | rs2374639   | NA |
| chr7 | 94923585 | 94923585 | C    | T | UTR3         | PPP1R9A | NA                  | NA                                                            | NA                              | NA          | NA |
| chr7 | 95727014 | 95727014 | T    | C | UTR3         | DYNC111 | NA                  | NA                                                            | NA                              | rs7794344   | NA |
| chr7 | 98444287 | 98444287 | C    | T | UTR3         | TMEM130 | NA                  | NA                                                            | NA                              | rs1047035   | NA |
| chr7 | 99766216 | 99766216 | C    | A | UTR5         | GAL3ST4 | NA                  | NA                                                            | NA                              | NA          | NA |
| chr7 | 1E+08    | 1E+08    | A    | C | exonic       | NYAP1   | nonsynonymous SNV   | NYAP1:NM_173564:exon4:c.A797C:p.Y266S                         | NA                              | NA          | D  |
| chr7 | 1E+08    | 1E+08    | C    | G | exonic       | NYAP1   | nonsynonymous SNV   | NYAP1:NM_173564:exon4:c.C815G:p.A272G                         | NA                              | NA          | B  |
| chr7 | 1E+08    | 1E+08    | T    | G | exonic       | NYAP1   | synonymous SNV      | NYAP1:NM_173564:exon4:c.T816G:p.A272A                         | NA                              | NA          | NA |
| chr7 | 1E+08    | 1E+08    | G    | C | exonic       | NYAP1   | nonsynonymous SNV   | NYAP1:NM_173564:exon4:c.G836C:p.G279A                         | NA                              | NA          | P  |
| chr7 | 1E+08    | 1E+08    | T    | - | UTR3         | AGFG2   | NA                  | NA                                                            | NA                              | rs145117814 | NA |
| chr7 | 1E+08    | 1E+08    | C    | A | exonic       | ZAN     | unknown             | UNKNOWN                                                       | NA                              | NA          | NA |
| chr7 | 1E+08    | 1E+08    | T    | C | exonic       | ZAN     | unknown             | UNKNOWN                                                       | NA                              | NA          | NA |
| chr7 | 1E+08    | 1E+08    | T    | C | exonic       | ZAN     | unknown             | UNKNOWN                                                       | SM393154,COSM393155;OCCURENCE=: | NA          | NA |
| chr7 | 1E+08    | 1E+08    | T    | C | exonic       | ZAN     | unknown             | UNKNOWN                                                       | NA                              | NA          | NA |
| chr7 | 1.01E+08 | 1.01E+08 | T    | C | exonic       | MUC12   | synonymous SNV      | MUC12:NM_001164462:exon2:c.T2670C:p.D890D                     | NA                              | NA          | NA |
| chr7 | 1.01E+08 | 1.01E+08 | A    | C | exonic       | MUC12   | nonsynonymous SNV   | MUC12:NM_001164462:exon2:c.A2682C:p.L894F                     | NA                              | NA          | NA |
| chr7 | 1.01E+08 | 1.01E+08 | A    | T | exonic       | MUC12   | synonymous SNV      | MUC12:NM_001164462:exon2:c.A2721T:p.S907S                     | NA                              | NA          | NA |
| chr7 | 1.01E+08 | 1.01E+08 | T    | C | exonic       | MUC12   | synonymous SNV      | MUC12:NM_001164462:exon2:c.T2745C:p.G915G                     | NA                              | NA          | NA |
| chr7 | 1.01E+08 | 1.01E+08 | A    | C | exonic       | MUC12   | synonymous SNV      | MUC12:NM_001164462:exon2:c.A2748C:p.S916S                     | NA                              | NA          | NA |
| chr7 | 1.01E+08 | 1.01E+08 | T    | A | exonic       | MUC12   | synonymous SNV      | MUC12:NM_001164462:exon2:c.T2751A:p.T917T                     | NA                              | NA          | NA |
| chr7 | 1.01E+08 | 1.01E+08 | G    | A | exonic       | MUC12   | nonsynonymous SNV   | MUC12:NM_001164462:exon2:c.G2758A:p.A920T                     | NA                              | rs192144740 | NA |
| chr7 | 1.01E+08 | 1.01E+08 | C    | A | exonic       | MUC12   | synonymous SNV      | MUC12:NM_001164462:exon2:c.C2784A:p.A928A                     | NA                              | rs184584311 | NA |
| chr7 | 1.01E+08 | 1.01E+08 | A    | C | exonic       | MUC12   | nonsynonymous SNV   | MUC12:NM_001164462:exon2:c.A2798C:p.Q933P                     | NA                              | NA          | NA |
| chr7 | 1.01E+08 | 1.01E+08 | A    | T | exonic       | MUC12   | synonymous SNV      | MUC12:NM_001164462:exon2:c.A2808T:p.T936T                     | NA                              | NA          | NA |
| chr7 | 1.01E+08 | 1.01E+08 | G    | A | exonic       | MUC12   | nonsynonymous SNV   | MUC12:NM_001164462:exon2:c.G2858A:p.S953N                     | NA                              | NA          | NA |
| chr7 | 1.01E+08 | 1.01E+08 | C    | A | exonic       | MUC12   | synonymous SNV      | MUC12:NM_001164462:exon2:c.C2913A:p.G971G                     | NA                              | rs200215189 | NA |
| chr7 | 1.01E+08 | 1.01E+08 | A    | G | exonic       | MUC12   | synonymous SNV      | MUC12:NM_001164462:exon2:c.A2916G:p.S972S                     | NA                              | NA          | NA |
| chr7 | 1.01E+08 | 1.01E+08 | A    | G | exonic       | MUC12   | nonsynonymous SNV   | MUC12:NM_001164462:exon2:c.A2941G:p.S981G                     | NA                              | NA          | NA |
| chr7 | 1.01E+08 | 1.01E+08 | C    | T | exonic       | MUC12   | synonymous SNV      | MUC12:NM_001164462:exon2:c.C2946T:p.S982S                     | NA                              | NA          | NA |
| chr7 | 1.01E+08 | 1.01E+08 | G    | - | exonic       | MUC12   | frameshift deletion | MUC12:NM_001164462:exon2:c.2951delG:p.S984fs                  | NA                              | NA          | NA |
| chr7 | 1.01E+08 | 1.01E+08 | T    | - | exonic       | MUC12   | frameshift deletion | MUC12:NM_001164462:exon2:c.2955delT:p.P985fs                  | NA                              | NA          | NA |
| chr7 | 1.01E+08 | 1.01E+08 | GACT | - | exonic       | MUC12   | frameshift deletion | MUC12:NM_001164462:exon2:c.2957_2960del:p.986_987del          | NA                              | NA          | NA |
| chr7 | 1.01E+08 | 1.01E+08 | A    | G | exonic       | MUC12   | nonsynonymous SNV   | MUC12:NM_001164462:exon2:c.A2990G:p.H997R                     | NA                              | NA          | NA |
| chr7 | 1.01E+08 | 1.01E+08 | C    | G | exonic       | MUC12   | nonsynonymous SNV   | MUC12:NM_001164462:exon2:c.C2991G:p.H997Q                     | NA                              | NA          | NA |
| chr7 | 1.01E+08 | 1.01E+08 | G    | A | exonic       | MUC12   | nonsynonymous SNV   | MUC12:NM_001164462:exon2:c.G2995A:p.A999T                     | NA                              | NA          | NA |
| chr7 | 1.01E+08 | 1.01E+08 | A    | G | exonic       | MUC12   | synonymous SNV      | MUC12:NM_001164462:exon2:c.A3000G:p.S1000S                    | NA                              | NA          | NA |
| chr7 | 1.01E+08 | 1.01E+08 | C    | A | exonic       | MUC12   | nonsynonymous SNV   | MUC12:NM_001164462:exon2:c.C3002A:p.T1001N                    | NA                              | NA          | NA |
| chr7 | 1.01E+08 | 1.01E+08 | C    | G | exonic       | MUC12   | nonsynonymous SNV   | MUC12:NM_001164462:exon2:c.C3004G:p.H1002D                    | NA                              | NA          | NA |
| chr7 | 1.01E+08 | 1.01E+08 | G    | C | exonic       | MUC12   | synonymous SNV      | MUC12:NM_001164462:exon2:c.G3012C:p.T1004T                    | NA                              | NA          | NA |
| chr7 | 1.01E+08 | 1.01E+08 | A    | T | exonic       | MUC12   | nonsynonymous SNV   | MUC12:NM_001164462:exon2:c.A3034T:p.T1012S                    | NA                              | NA          | NA |
| chr7 | 1.01E+08 | 1.01E+08 | C    | T | exonic       | MUC12   | nonsynonymous SNV   | MUC12:NM_001164462:exon2:c.C3041T:p.P1014L                    | NA                              | NA          | NA |
| chr7 | 1.01E+08 | 1.01E+08 | A    | C | exonic       | MUC12   | nonsynonymous SNV   | MUC12:NM_001164462:exon2:c.A3062C:p.Y1021S                    | NA                              | NA          | NA |
| chr7 | 1.01E+08 | 1.01E+08 | C    | G | exonic       | MUC12   | nonsynonymous SNV   | MUC12:NM_001164462:exon2:c.C3067G:p.R1023G                    | NA                              | NA          | NA |
| chr7 | 1.01E+08 | 1.01E+08 | A    | G | exonic       | MUC12   | synonymous SNV      | MUC12:NM_001164462:exon2:c.A3075G:p.P1025P                    | NA                              | NA          | NA |
| chr7 | 1.01E+08 | 1.01E+08 | G    | A | exonic       | MUC12   | nonsynonymous SNV   | MUC12:NM_001164462:exon2:c.G3076A:p.G1026S                    | NA                              | NA          | NA |
| chr7 | 1.01E+08 | 1.01E+08 | G    | A | exonic       | MUC12   | synonymous SNV      | MUC12:NM_001164462:exon2:c.G3081A:p.S1027S                    | NA                              | NA          | NA |
| chr7 | 1.01E+08 | 1.01E+08 | C    | A | exonic       | MUC12   | nonsynonymous SNV   | MUC12:NM_001164462:exon2:c.C3820A:p.L1274I                    | NA                              | NA          | NA |
| chr7 | 1.01E+08 | 1.01E+08 | T    | G | exonic       | MUC12   | synonymous SNV      | MUC12:NM_001164462:exon2:c.T3849G:p.T1283T                    | NA                              | NA          | NA |

|      |          |          |          |      |              |            |                        |                                                               |                                 |             |    |
|------|----------|----------|----------|------|--------------|------------|------------------------|---------------------------------------------------------------|---------------------------------|-------------|----|
| chr7 | 1.01E+08 | 1.01E+08 | A        | G    | exonic       | MUC12      | nonsynonymous SNV      | MUC12:NM_001164462:exon2:c.A4043G:p.D1348G                    | NA                              | rs112404953 | NA |
| chr7 | 1.01E+08 | 1.01E+08 | G        | C    | exonic       | MUC12      | nonsynonymous SNV      | MUC12:NM_001164462:exon2:c.G7226C:p.S2409T                    | NA                              | NA          | NA |
| chr7 | 1.01E+08 | 1.01E+08 | A        | C    | exonic       | MUC12      | synonymous SNV         | MUC12:NM_001164462:exon2:c.A7230C:p.T2410T                    | NA                              | NA          | NA |
| chr7 | 1.01E+08 | 1.01E+08 | A        | G    | exonic       | MUC12      | nonsynonymous SNV      | MUC12:NM_001164462:exon2:c.A7241G:p.Q2414R                    | NA                              | NA          | NA |
| chr7 | 1.01E+08 | 1.01E+08 | G        | A    | exonic       | MUC12      | nonsynonymous SNV      | MUC12:NM_001164462:exon2:c.G8069A:p.R2690H                    | NA                              | NA          | NA |
| chr7 | 1.01E+08 | 1.01E+08 | G        | C    | exonic       | MUC12      | nonsynonymous SNV      | MUC12:NM_001164462:exon2:c.G10142C:p.S3381T                   | NA                              | NA          | NA |
| chr7 | 1.01E+08 | 1.01E+08 | C        | T    | exonic       | MUC12      | nonsynonymous SNV      | MUC12:NM_001164462:exon2:c.C11036T:p.T3679I                   | NA                              | rs201665808 | NA |
| chr7 | 1.01E+08 | 1.01E+08 | C        | G    | exonic       | MUC12      | nonsynonymous SNV      | MUC12:NM_001164462:exon2:c.C11327G:p.P3776R                   | NA                              | rs201148522 | NA |
| chr7 | 1.01E+08 | 1.01E+08 | T        | C    | exonic       | MUC12      | nonsynonymous SNV      | MUC12:NM_001164462:exon2:c.T12355C:p.F4119L                   | NA                              | rs181671450 | NA |
| chr7 | 1.02E+08 | 1.02E+08 | C        | A    | UTR3         | RASA4      | NA                     | NA                                                            | NA                              | NA          | NA |
| chr7 | 1.03E+08 | 1.03E+08 | A        | -    | UTR3         | ARMC10     | NA                     | NA                                                            | NA                              | NA          | NA |
| chr7 | 1.03E+08 | 1.03E+08 | A        | T    | ncRNA_exonic | RPL19P12   | NA                     | NA                                                            | NA                              | NA          | NA |
| chr7 | 1.05E+08 | 1.05E+08 | C        | A    | ncRNA_exonic | LHFPL3-AS2 | NA                     | NA                                                            | NA                              | NA          | NA |
| chr7 | 1.07E+08 | 1.07E+08 | A        | C    | UTR3         | COG5       | NA                     | NA                                                            | NA                              | NA          | NA |
| chr7 | 1.14E+08 | 1.14E+08 | A        | T    | UTR3         | PPP1R3A    | NA                     | NA                                                            | NA                              | NA          | NA |
| chr7 | 1.16E+08 | 1.16E+08 | -        | A    | UTR3         | CAV2       | NA                     | NA                                                            | NA                              | NA          | NA |
| chr7 | 1.2E+08  | 1.2E+08  | A        | C    | exonic       | KCND2      | synonymous SNV         | KCND2:NM_012281:exon1:c.A873C:p.T291T                         | NA                              | NA          | NA |
| chr7 | 1.2E+08  | 1.2E+08  | A        | T    | exonic       | KCND2      | nonsynonymous SNV      | KCND2:NM_012281:exon1:c.A898T:p.I300F                         | NA                              | NA          | D  |
| chr7 | 1.21E+08 | 1.21E+08 | A        | C    | exonic       | WNT16      | nonsynonymous SNV      | WNT16:NM_057168:exon2:c.A283                                  | NA                              | NA          | B  |
| chr7 | 1.22E+08 | 1.22E+08 | G        | A    | exonic       | AASS       | nonsynonymous SNV      | AASS:NM_005763:exon14:c.C1456T:p.L486F                        | NA                              | NA          | D  |
| chr7 | 1.23E+08 | 1.23E+08 | C        | A    | UTR3         | SLC13A1    | NA                     | NA                                                            | NA                              | NA          | NA |
| chr7 | 1.23E+08 | 1.23E+08 | AA       | -    | UTR3         | SLC13A1    | NA                     | NA                                                            | NA                              | NA          | NA |
| chr7 | 1.27E+08 | 1.27E+08 | -        | ACAT | UTR3         | PAX4       | NA                     | NA                                                            | NA                              | rs200757052 | NA |
| chr7 | 1.29E+08 | 1.29E+08 | GCCCACTC | -    | exonic       | IRF5       | nonframeshift deletion | IRF5:NM_001098630:exon6:c.50;OCCURENCE=1(haematopoietic_and_l | NA                              | NA          | NA |
| chr7 | 1.3E+08  | 1.3E+08  | TGTGTG   | -    | UTR3         | CPA4       | NA                     | NA                                                            | NA                              | rs146877444 | NA |
| chr7 | 1.3E+08  | 1.3E+08  | T        | C    | exonic       | CPA5       | synonymous SNV         | CPA5:NM_080385:exon5:c.T261C:p.S87S,CPA5:NM_00                | NA                              | rs7808823   | NA |
| chr7 | 1.3E+08  | 1.3E+08  | T        | C    | exonic       | CPA5       | nonsynonymous SNV      | CPA5:NM_001127442:exon11:c.T1073C:p.M358T                     | NA                              | rs17164867  | NA |
| chr7 | 1.3E+08  | 1.3E+08  | C        | T    | exonic       | CPA1       | synonymous SNV         | CPA1:NM_001868:exon4:c.C474T:p.Y158Y                          | NA                              | rs968404    | NA |
| chr7 | 1.31E+08 | 1.31E+08 | C        | A    | exonic       | PODXL      | nonsynonymous SNV      | PODXL:NM_005397:exon2:c.G48                                   | NA                              | NA          | P  |
| chr7 | 1.37E+08 | 1.37E+08 | CA       | -    | UTR5         | CHRM2      | NA                     | NA                                                            | NA                              | rs35916399  | NA |
| chr7 | 1.39E+08 | 1.39E+08 | TT       | -    | UTR3         | KIAA1549   | NA                     | NA                                                            | NA                              | NA          | NA |
| chr7 | 1.39E+08 | 1.39E+08 | GT       | -    | UTR3         | UBN2       | NA                     | NA                                                            | NA                              | NA          | NA |
| chr7 | 1.39E+08 | 1.39E+08 | A        | -    | UTR3         | UBN2       | NA                     | NA                                                            | NA                              | rs3217265   | NA |
| chr7 | 1.39E+08 | 1.39E+08 | A        | C    | UTR3         | HIPK2      | NA                     | NA                                                            | NA                              | NA          | NA |
| chr7 | 1.4E+08  | 1.4E+08  | T        | G    | exonic       | DENND2A    | synonymous SNV         | DENND2A:NM_015689:exon1:c.A906C:p.L302L                       | NA                              | NA          | NA |
| chr7 | 1.4E+08  | 1.4E+08  | AA       | -    | ncRNA_exonic | NDUFB2-AS1 | NA                     | NA                                                            | NA                              | NA          | NA |
| chr7 | 1.43E+08 | 1.43E+08 | A        | -    | ncRNA_exonic | OR6W1P     | NA                     | NA                                                            | NA                              | NA          | NA |
| chr7 | 1.43E+08 | 1.43E+08 | A        | G    | exonic       | CTAGE15    | synonymous SNV         | CTAGE15:NM_001008747:exon1:c.A1839G:p.G613G                   | NA                              | NA          | NA |
| chr7 | 1.43E+08 | 1.43E+08 | T        | A    | exonic       | CTAGE15    | synonymous SNV         | CTAGE15:NM_001008747:exon1:c.T1869A:p.P623P                   | NA                              | NA          | NA |
| chr7 | 1.43E+08 | 1.43E+08 | T        | C    | exonic       | CTAGE15    | nonsynonymous SNV      | CTAGE15:NM_001008747:exon1:c.T1915C:p.S639P                   | NA                              | NA          | NA |
| chr7 | 1.44E+08 | 1.44E+08 | A        | G    | exonic       | CTAGE4     | synonymous SNV         | CTAGE4:NM_198495:exon1:c.T2268C:p.Y756Y                       | NA                              | rs202035285 | NA |
| chr7 | 1.49E+08 | 1.49E+08 | -        | C    | exonic       | KRBA1      | unknown                | UNKNOWN                                                       | NA                              | rs145097116 | NA |
| chr7 | 1.51E+08 | 1.51E+08 | C        | A    | exonic       | ASB10      | nonsynonymous SNV      | ASB10:NM_001142460:exon3:c.G779T:p.C260F,ASB10:N              | NA                              | NA          | B  |
| chr7 | 1.51E+08 | 1.51E+08 | A        | C    | UTR3         | PRKAG2     | NA                     | NA                                                            | NA                              | rs199973452 | NA |
| chr7 | 1.52E+08 | 1.52E+08 | C        | G    | exonic       | MLL3       | nonsynonymous SNV      | MLL3:NM_170606:exon16:c.G2755C:p.V919L                        | 1131646,COSM1131647;OCCURENCE=1 | rs111791757 | B  |
| chr7 | 1.52E+08 | 1.52E+08 | G        | A    | exonic       | MLL3       | nonsynonymous SNV      | MLL3:NM_170606:exon14:c.C2315T:p.S772L                        | NA                              | rs4024453   | P  |
| chr7 | 1.55E+08 | 1.55E+08 | T        | A    | UTR3         | DPP6       | NA                     | NA                                                            | NA                              | rs78561625  | NA |
| chr7 | 1.55E+08 | 1.55E+08 | C        | A    | ncRNA_exonic | LOC202781  | NA                     | NA                                                            | NA                              | NA          | NA |
| chr7 | 1.59E+08 | 1.59E+08 | G        | A    | exonic       | ESYT2      | synonymous SNV         | ESYT2:NM_020728:exon17:c.C2091T:p.A697A                       | NA                              | rs57686648  | NA |
| chr7 | 1.59E+08 | 1.59E+08 | G        | C    | exonic       | ESYT2      | synonymous SNV         | ESYT2:NM_020728:exon17:c.C2082G:p.P694P                       | NA                              | rs59980573  | NA |
| chr8 | 161222   | 161222   | G        | C    | ncRNA_exonic | RPL23AP53  | NA                     | NA                                                            | NA                              | rs2906360   | NA |
| chr8 | 1729586  | 1729586  | T        | G    | UTR3         | CLN8       | NA                     | NA                                                            | NA                              | NA          | NA |
| chr8 | 1733460  | 1733460  | C        | T    | UTR3         | CLN8       | NA                     | NA                                                            | NA                              | NA          | NA |
| chr8 | 1733665  | 1733665  | T        | G    | UTR3         | CLN8       | NA                     | NA                                                            | NA                              | NA          | NA |
| chr8 | 1733674  | 1733674  | T        | G    | UTR3         | CLN8       | NA                     | NA                                                            | NA                              | NA          | NA |
| chr8 | 6359075  | 6359075  | T        | -    | UTR3         | ANGPT2     | NA                     | NA                                                            | NA                              | NA          | NA |
| chr8 | 10464990 | 10464990 | T        | C    | exonic       | RP1L1      | synonymous SNV         | RP1L1:NM_178857:exon4:c.A6618G:p.Q2206Q                       | NA                              | NA          | NA |
| chr8 | 10465086 | 10465086 | T        | C    | exonic       | RP1L1      | synonymous SNV         | RP1L1:NM_178857:exon4:c.A6522G:p.Q2174Q                       | NA                              | NA          | NA |
| chr8 | 10465721 | 10465721 | A        | C    | exonic       | RP1L1      | nonsynonymous SNV      | RP1L1:NM_178857:exon4:c.T5887G:p.S1963A                       | NA                              | rs190549596 | NA |
| chr8 | 10465919 | 10465919 | A        | C    | exonic       | RP1L1      | nonsynonymous SNV      | RP1L1:NM_178857:exon4:c.T5689G:p.W1897G                       | NA                              | NA          | NA |
| chr8 | 10582231 | 10582231 | T        | -    | UTR3         | SOX7       | NA                     | NA                                                            | NA                              | rs113669505 | NA |
| chr8 | 11406593 | 11406593 | T        | C    | exonic       | BLK        | synonymous SNV         | BLK:NM_001715:exon5:c.T330C:p.S110S                           | NA                              | rs3816668   | NA |
| chr8 | 11973535 | 11973535 | A        | G    | ncRNA_exonic | FAM66D     | NA                     | NA                                                            | NA                              | NA          | NA |
| chr8 | 12039821 | 12039821 | G        | T    | UTR3         | FAM86B1    | NA                     | NA                                                            | NA                              | rs143950143 | NA |
| chr8 | 12040786 | 12040786 | C        | G    | UTR3         | FAM86B1    | NA                     | NA                                                            | NA                              | rs201122164 | NA |
| chr8 | 12040998 | 12040998 | G        | A    | UTR3         | FAM86B1    | NA                     | NA                                                            | NA                              | rs141787656 | NA |

|      |          |          |          |    |              |                             |                   |                                                                |                                   |             |    |
|------|----------|----------|----------|----|--------------|-----------------------------|-------------------|----------------------------------------------------------------|-----------------------------------|-------------|----|
| chr8 | 12283157 | 12283157 | T        | C  | UTR3         | FAM86B2                     | NA                | NA                                                             | NA                                | rs2698896   | NA |
| chr8 | 12283281 | 12283281 | G        | A  | UTR3         | FAM86B2                     | NA                | NA                                                             | NA                                | rs2684074   | NA |
| chr8 | 12286307 | 12286307 | T        | C  | exonic       | FAM86B2                     | nonsynonymous SNV | FAM86B2:NM_001137610:exon6:c.A577G:p.I193V                     | NA                                | rs148161726 | NA |
| chr8 | 12286609 | 12286609 | T        | C  | exonic       | FAM86B2                     | synonymous SNV    | FAM86B2:NM_001137610:exon5:c.A357G:p.S119S                     | NA                                | rs2684085   | NA |
| chr8 | 17079490 | 17079491 | TT       | -  | UTR3         | ZDHC2                       | NA                | NA                                                             | NA                                | NA          | NA |
| chr8 | 17579505 | 17579505 | A        | -  | UTR5         | MTUS1                       | NA                | NA                                                             | NA                                | rs34302917  | NA |
| chr8 | 20106557 | 20106557 | A        | G  | UTR3         | LZTS1                       | NA                | NA                                                             | NA                                | NA          | NA |
| chr8 | 23536561 | 23536563 | TTT      | -  | UTR3         | NKX3-1                      | NA                | NA                                                             | NA                                | rs140739091 | NA |
| chr8 | 27143184 | 27143184 | A        | -  | UTR3         | TRIM35                      | NA                | NA                                                             | NA                                | rs34388696  | NA |
| chr8 | 27879723 | 27879732 | GGAGTGCA | -  | UTR3         | NUGGC                       | NA                | NA                                                             | NA                                | rs113806414 | NA |
| chr8 | 28205758 | 28205758 | A        | C  | UTR3         | ZNF395                      | NA                | NA                                                             | NA                                | NA          | NA |
| chr8 | 28925544 | 28925544 | T        | G  | UTR3         | KIF13B                      | NA                | NA                                                             | NA                                | NA          | NA |
| chr8 | 38034284 | 38034284 | T        | C  | UTR5         | BAG4                        | NA                | NA                                                             | NA                                | rs55962869  | NA |
| chr8 | 41481358 | 41481358 | T        | -  | UTR3         | AGPAT6                      | NA                | NA                                                             | NA                                | NA          | NA |
| chr8 | 41583441 | 41583441 | T        | C  | exonic       | ANK1                        | synonymous SNV    | .549G:p.V183V,ANK1:NM_020475:exon6:c.A450G:p.V150V,ANK1:NM_    | NA                                | rs6982971   | NA |
| chr8 | 41788246 | 41788246 | A        | T  | UTR3         | KAT6A                       | NA                | NA                                                             | NA                                | NA          | NA |
| chr8 | 41790779 | 41790779 | T        | G  | exonic       | KAT6A                       | synonymous SNV    | .P1653P,KAT6A:NM_001099412:exon18:c.A4959C:p.P1653P,KAT6A:NM_  | NA                                | NA          | NA |
| chr8 | 42877229 | 42877229 | A        | -  | UTR3         | HOOK3                       | NA                | NA                                                             | NA                                | NA          | NA |
| chr8 | 52732614 | 52732614 | T        | C  | UTR3         | PCMTD1                      | NA                | NA                                                             | NA                                | NA          | NA |
| chr8 | 52732641 | 52732641 | T        | C  | UTR3         | PCMTD1                      | NA                | NA                                                             | NA                                | rs73592209  | NA |
| chr8 | 57075770 | 57075771 | TT       | -  | UTR3         | PLAG1                       | NA                | NA                                                             | NA                                | NA          | NA |
| chr8 | 57307835 | 57307835 | C        | A  | intergenic   | 6C5(dist=74594),PENK(dist=4 | NA                | NA                                                             | NA                                | NA          | NA |
| chr8 | 67405682 | 67405682 | A        | -  | UTR5         | C8orf46                     | NA                | NA                                                             | NA                                | rs5892058   | NA |
| chr8 | 72981327 | 72981327 | A        | G  | exonic       | TRPA1                       | synonymous SNV    | TRPA1:NM_007332:exon3:c.T375C:p.N125N                          | NA                                | rs1811457   | NA |
| chr8 | 81886342 | 81886342 | C        | A  | UTR3         | PAG1                        | NA                | NA                                                             | NA                                | NA          | NA |
| chr8 | 81886387 | 81886387 | -        | TT | UTR3         | PAG1                        | NA                | NA                                                             | NA                                | NA          | NA |
| chr8 | 86572249 | 86572249 | A        | G  | UTR3         | REXO1L1                     | NA                | NA                                                             | NA                                | rs28564465  | NA |
| chr8 | 86572578 | 86572578 | T        | C  | UTR3         | REXO1L1                     | NA                | NA                                                             | NA                                | rs28399792  | NA |
| chr8 | 86572958 | 86572958 | T        | G  | UTR3         | REXO1L1                     | NA                | NA                                                             | NA                                | rs145855931 | NA |
| chr8 | 86786659 | 86786659 | G        | T  | UTR3         | REXO1L1                     | NA                | NA                                                             | NA                                | NA          | NA |
| chr8 | 90946056 | 90946056 | A        | G  | UTR3         | NBN                         | NA                | NA                                                             | NA                                | rs9995      | NA |
| chr8 | 92971169 | 92971170 | AG       | -  | UTR3         | RUNX1T1                     | NA                | NA                                                             | NA                                | rs36062285  | NA |
| chr8 | 92971184 | 92971184 | T        | -  | UTR3         | RUNX1T1                     | NA                | NA                                                             | NA                                | NA          | NA |
| chr8 | 1.02E+08 | 1.02E+08 | G        | A  | exonic       | PABPC1                      | nonsynonymous SNV | PABPC1:NM_002568:exon11:c.C1477T:p.R493C                       | NA                                | rs62513924  | P  |
| chr8 | 1.02E+08 | 1.02E+08 | G        | A  | exonic       | PABPC1                      | nonsynonymous SNV | PABPC1:NM_002568:exon8:c.C1205T:p.P402L                        | NA                                | rs139094790 | B  |
| chr8 | 1.02E+08 | 1.02E+08 | C        | A  | exonic       | PABPC1                      | stopgain SNV      | PABPC1:NM_002568:exon8:c.G1033T:p.E345X                        | NA                                | rs142985461 | NA |
| chr8 | 1.16E+08 | 1.16E+08 | C        | A  | UTR3         | TRPS1                       | NA                | NA                                                             | NA                                | NA          | NA |
| chr8 | 1.23E+08 | 1.23E+08 | C        | T  | ncRNA_UTR5   | HAS2                        | NA                | NA                                                             | NA                                | NA          | NA |
| chr8 | 1.23E+08 | 1.23E+08 | C        | T  | ncRNA_UTR5   | HAS2                        | NA                | NA                                                             | NA                                | NA          | NA |
| chr8 | 1.34E+08 | 1.34E+08 | TT       | -  | UTR3         | SLA                         | NA                | NA                                                             | NA                                | NA          | NA |
| chr8 | 1.42E+08 | 1.42E+08 | T        | C  | exonic       | MROH5                       | unknown           | UNKNOWN                                                        | NA                                | rs73713680  | NA |
| chr8 | 1.42E+08 | 1.42E+08 | C        | T  | exonic       | MROH5                       | unknown           | UNKNOWN                                                        | NA                                | rs73713681  | NA |
| chr8 | 1.45E+08 | 1.45E+08 | G        | C  | exonic       | MROH6                       | synonymous SNV    | MROH6:NM_001100878:exon1:c.C192G:p.P64P                        | NA                                | rs4873804   | NA |
| chr8 | 1.45E+08 | 1.45E+08 | T        | C  | exonic       | SCRIB                       | synonymous SNV    | .15356:exon32:c.A4350G:p.P1450P,SCRIB:NM_182706:exon32:c.A4350 | NA                                | rs6991873   | NA |
| chr8 | 1.46E+08 | 1.46E+08 | C        | A  | UTR3         | ZNF250                      | NA                | NA                                                             | NA                                | NA          | NA |
| chr8 | 1.46E+08 | 1.46E+08 | T        | A  | ncRNA_exonic | TMED10P1                    | NA                | NA                                                             | NA                                | NA          | NA |
| chr9 | 14665    | 14665    | G        | A  | UTR3         | WASH1                       | NA                | NA                                                             | ID=COSN405103;OCCURENCE=1(lung)   | rs149305563 | NA |
| chr9 | 14764    | 14764    | C        | T  | UTR3         | WASH1                       | NA                | NA                                                             | NA                                | rs199668463 | NA |
| chr9 | 117998   | 117998   | G        | T  | exonic       | FOXD4                       | nonsynonymous SNV | FOXD4:NM_207305:exon1:c.C122A:p.A41E                           | ID=COSM226644;OCCURENCE=1(skin)   | rs66612967  | B  |
| chr9 | 178937   | 178937   | C        | T  | exonic       | CBWD1                       | synonymous SNV    | M_001145356:exon1:c.G33A:p.E11E,CBWD1:NM_018491:exon1:c.G3     | NA                                | rs16925052  | NA |
| chr9 | 178947   | 178947   | G        | A  | exonic       | CBWD1                       | nonsynonymous SNV | NM_001145356:exon1:c.C23T:p.A8V,CBWD1:NM_018491:exon1:c.C2     | NA                                | rs16925054  | B  |
| chr9 | 179063   | 179063   | C        | G  | UTR5         | CBWD1                       | NA                | NA                                                             | NA                                | rs75051610  | NA |
| chr9 | 3824936  | 3824937  | TA       | -  | UTR3         | GLIS3                       | NA                | NA                                                             | NA                                | NA          | NA |
| chr9 | 14083479 | 14083479 | A        | -  | UTR3         | NFIB                        | NA                | NA                                                             | NA                                | NA          | NA |
| chr9 | 14993511 | 14993511 | T        | G  | ncRNA_exonic | LOC389705                   | NA                | NA                                                             | NA                                | rs1880012   | NA |
| chr9 | 15019719 | 15019719 | T        | C  | ncRNA_exonic | LOC389705                   | NA                | NA                                                             | NA                                | rs1916311   | NA |
| chr9 | 16412719 | 16412730 | GAGAGAGA | -  | UTR3         | BNC2                        | NA                | NA                                                             | NA                                | NA          | NA |
| chr9 | 16413355 | 16413355 | T        | -  | UTR3         | BNC2                        | NA                | NA                                                             | NA                                | rs5896689   | NA |
| chr9 | 27274108 | 27274108 | G        | T  | ncRNA_exonic | LINC00032                   | NA                | NA                                                             | NA                                | rs2057363   | NA |
| chr9 | 33043991 | 33043992 | AA       | -  | UTR3         | SMU1                        | NA                | NA                                                             | NA                                | rs141620295 | NA |
| chr9 | 33111314 | 33111314 | T        | A  | UTR3         | B4GALT1                     | NA                | NA                                                             | NA                                | NA          | NA |
| chr9 | 33253761 | 33253761 | A        | -  | UTR3         | BAG1                        | NA                | NA                                                             | NA                                | NA          | NA |
| chr9 | 33385733 | 33385733 | C        | T  | exonic       | AQP7                        | nonsynonymous SNV | AQP7:NM_001170:exon7:c.G657A:p.M219I                           | 180629;OCCURENCE=1(upper_aerodige | rs201117022 | B  |
| chr9 | 33385771 | 33385771 | C        | T  | exonic       | AQP7                        | nonsynonymous SNV | AQP7:NM_001170:exon7:c.G619A:p.G207S                           | NA                                | rs117663392 | B  |
| chr9 | 33386144 | 33386144 | G        | A  | exonic       | AQP7                        | synonymous SNV    | AQP7:NM_001170:exon6:c.C456T:p.V152V                           | NA                                | rs76209395  | NA |
| chr9 | 33386146 | 33386146 | C        | A  | exonic       | AQP7                        | nonsynonymous SNV | AQP7:NM_001170:exon6:c.G454T:p.V152F                           | NA                                | rs76608797  | B  |

|      |          |          |       |           |              |                    |                         |                                                              |    |             |    |
|------|----------|----------|-------|-----------|--------------|--------------------|-------------------------|--------------------------------------------------------------|----|-------------|----|
| chr9 | 33387047 | 33387047 | T     | G         | exonic       | AQP7               | nonsynonymous SNV       | AQP7:NM_001170:exon4:c.A188C:p.K63T                          | NA | rs4008658   | B  |
| chr9 | 33387073 | 33387073 | G     | A         | exonic       | AQP7               | synonymous SNV          | AQP7:NM_001170:exon4:c.C162T:p.S54S                          | NA | rs73645276  | NA |
| chr9 | 33447424 | 33447424 | C     | G         | exonic       | AQP3               | synonymous SNV          | AQP3:NM_004925:exon1:c.G105C:p.L35L                          | NA | rs591810    | NA |
| chr9 | 34833858 | 34833858 | T     | A         | ncRNA_exonic | FAM205B            | NA                      | NA                                                           | NA | rs3739879   | NA |
| chr9 | 37864593 | 37864593 | -     | T         | UTR3         | DCAF10             | NA                      | NA                                                           | NA | NA          | NA |
| chr9 | 38398304 | 38398304 | T     | C         | UTR3         | ALDH1B1            | NA                      | NA                                                           | NA | rs10973781  | NA |
| chr9 | 41953380 | 41953380 | C     | T         | ncRNA_exonic | MGC21881           | NA                      | NA                                                           | NA | rs78604336  | NA |
| chr9 | 41954166 | 41954166 | C     | T         | ncRNA_exonic | MGC21881           | NA                      | NA                                                           | NA | rs11262437  | NA |
| chr9 | 41960604 | 41960604 | C     | T         | ncRNA_exonic | KGFLP2             | NA                      | NA                                                           | NA | rs200748812 | NA |
| chr9 | 43032807 | 43032807 | A     | G         | ncRNA_exonic | FAM95B1            | NA                      | NA                                                           | NA | rs1965864   | NA |
| chr9 | 43624925 | 43624925 | A     | G         | exonic       | SPATA31A6          | synonymous SNV          | SPATA31A6:NM_001145196:exon4:c.T3762C:p.H1254H               | NA | rs2762364   | NA |
| chr9 | 45727897 | 45727897 | C     | G         | ncRNA_exonic | FAM27A             | NA                      | NA                                                           | NA | NA          | NA |
| chr9 | 45727901 | 45727901 | A     | G         | ncRNA_exonic | FAM27A             | NA                      | NA                                                           | NA | NA          | NA |
| chr9 | 66500435 | 66500435 | C     | A         | ncRNA_exonic | PTGER4P2-CDK2AP2P2 | NA                      | NA                                                           | NA | rs200229634 | NA |
| chr9 | 66501021 | 66501021 | C     | T         | ncRNA_exonic | PTGER4P2-CDK2AP2P2 | NA                      | NA                                                           | NA | rs4913214   | NA |
| chr9 | 66501045 | 66501045 | T     | C         | ncRNA_exonic | PTGER4P2-CDK2AP2P2 | NA                      | NA                                                           | NA | rs62549190  | NA |
| chr9 | 66501106 | 66501106 | G     | A         | ncRNA_exonic | PTGER4P2-CDK2AP2P2 | NA                      | NA                                                           | NA | rs78246050  | NA |
| chr9 | 66502730 | 66502730 | T     | G         | ncRNA_exonic | PTGER4P2-CDK2AP2P2 | NA                      | NA                                                           | NA | rs78123270  | NA |
| chr9 | 66502733 | 66502733 | G     | T         | ncRNA_exonic | PTGER4P2-CDK2AP2P2 | NA                      | NA                                                           | NA | rs75664577  | NA |
| chr9 | 69202059 | 69202059 | T     | C         | UTR5         | FOXD4L6            | NA                      | NA                                                           | NA | NA          | NA |
| chr9 | 69424288 | 69424288 | T     | C         | UTR3         | ANKRD20A4          | NA                      | NA                                                           | NA | rs78290728  | NA |
| chr9 | 69424311 | 69424311 | C     | A         | UTR3         | ANKRD20A4          | NA                      | NA                                                           | NA | rs3866289   | NA |
| chr9 | 69663680 | 69663680 | A     | C         | ncRNA_exonic | LOC100133920       | NA                      | NA                                                           | NA | rs201199565 | NA |
| chr9 | 69664901 | 69664901 | T     | C         | ncRNA_exonic | LOC100133920       | NA                      | NA                                                           | NA | NA          | NA |
| chr9 | 70177312 | 70177312 | C     | T         | exonic       | FOXD4L5            | synonymous SNV          | FOXD4L5:NM_001126334:exon1:c.G672A:p.A224A                   | NA | rs2921292   | NA |
| chr9 | 70177559 | 70177559 | A     | G         | exonic       | FOXD4L5            | nonsynonymous SNV       | FOXD4L5:NM_001126334:exon1:c.T425C:p.F142S                   | NA | NA          | NA |
| chr9 | 70919869 | 70919869 | C     | A         | UTR3         | FOXD4L3            | NA                      | NA                                                           | NA | rs200191707 | NA |
| chr9 | 94495608 | 94495608 | T     | C         | exonic       | ROR2               | nonsynonymous SNV       | ROR2:NM_004560:exon6:c.A733G:p.T245A                         | NA | rs10820900  | B  |
| chr9 | 96439004 | 96439004 | -     | CCCTCCACC | exonic       | PHF2               | nonframeshift insertion | NM_005392:exon21:c.2961_2962insCCCTCCACCACA:p.T987delins1    | NA | rs149736720 | NA |
| chr9 | 99264877 | 99264877 | T     | -         | UTR3         | CDC14B             | NA                      | NA                                                           | NA | rs34988377  | NA |
| chr9 | 99538299 | 99538299 | C     | A         | exonic       | ZNF510             | nonsynonymous SNV       | ZNF510:NM_014930:exon2:c.G53T:p.G18V                         | NA | NA          | D  |
| chr9 | 1.01E+08 | 1.01E+08 | T     | A         | UTR5         | CORO2A             | NA                      | NA                                                           | NA | rs2275709   | NA |
| chr9 | 1.01E+08 | 1.01E+08 | G     | T         | UTR3         | GABBR2             | NA                      | NA                                                           | NA | rs73657131  | NA |
| chr9 | 1.02E+08 | 1.02E+08 | G     | T         | UTR3         | TGFBR1             | NA                      | NA                                                           | NA | rs199545273 | NA |
| chr9 | 1.03E+08 | 1.03E+08 | A     | C         | exonic       | NR4A3              | nonsynonymous SNV       | 24C:p.T142P,NR4A3:NM_173199:exon3:c.A424C:p.T142P,NR4A3:NM_  | NA | NA          | D  |
| chr9 | 1.1E+08  | 1.1E+08  | A     | C         | exonic       | ZNF462             | nonsynonymous SNV       | ZNF462:NM_021224:exon3:c.A4303C:p.T1435P                     | NA | NA          | B  |
| chr9 | 1.12E+08 | 1.12E+08 | G     | C         | UTR5         | IKBKAP             | NA                      | NA                                                           | NA | rs2275641   | NA |
| chr9 | 1.12E+08 | 1.12E+08 | T     | -         | UTR3         | TMEM245            | NA                      | NA                                                           | NA | NA          | NA |
| chr9 | 1.12E+08 | 1.12E+08 | G     | A         | UTR3         | TMEM245            | NA                      | NA                                                           | NA | rs1044905   | NA |
| chr9 | 1.16E+08 | 1.16E+08 | G     | T         | UTR3         | SNX30              | NA                      | NA                                                           | NA | rs113416907 | NA |
| chr9 | 1.16E+08 | 1.16E+08 | T     | -         | UTR3         | SNX30              | NA                      | NA                                                           | NA | NA          | NA |
| chr9 | 1.17E+08 | 1.17E+08 | AA    | -         | UTR3         | AKNA               | NA                      | NA                                                           | NA | rs10610956  | NA |
| chr9 | 1.17E+08 | 1.17E+08 | G     | A         | UTR5         | DFNB31             | NA                      | NA                                                           | NA | rs2297814   | NA |
| chr9 | 1.17E+08 | 1.17E+08 | G     | T         | UTR5         | DFNB31             | NA                      | NA                                                           | NA | rs4527950   | NA |
| chr9 | 1.17E+08 | 1.17E+08 | C     | T         | UTR5         | DFNB31             | NA                      | NA                                                           | NA | rs10759714  | NA |
| chr9 | 1.19E+08 | 1.19E+08 | -     | A         | UTR3         | PAPPA              | NA                      | NA                                                           | NA | NA          | NA |
| chr9 | 1.19E+08 | 1.19E+08 | G     | C         | UTR5         | TRIM32             | NA                      | NA                                                           | NA | rs12342207  | NA |
| chr9 | 1.26E+08 | 1.26E+08 | G     | A         | UTR3         | RABGAP1            | NA                      | NA                                                           | NA | rs803718    | NA |
| chr9 | 1.28E+08 | 1.28E+08 | A     | G         | exonic       | OLFML2A            | nonsynonymous SNV       | OLFML2A:NM_182487:exon6:c.A925G:p.T309A                      | NA | rs7874348   | B  |
| chr9 | 1.31E+08 | 1.31E+08 | T     | C         | exonic       | CERCAM             | nonsynonymous SNV       | CERCAM:NM_016174:exon5:c.T590C:p.F197S                       | NA | NA          | P  |
| chr9 | 1.31E+08 | 1.31E+08 | A     | G         | exonic       | CERCAM             | synonymous SNV          | CERCAM:NM_016174:exon5:c.A672G:p.E224E                       | NA | NA          | NA |
| chr9 | 1.32E+08 | 1.32E+08 | C     | G         | UTR3         | PPP2R4             | NA                      | NA                                                           | NA | NA          | NA |
| chr9 | 1.32E+08 | 1.32E+08 | C     | G         | UTR3         | PPP2R4             | NA                      | NA                                                           | NA | NA          | NA |
| chr9 | 1.32E+08 | 1.32E+08 | T     | A         | UTR3         | PPP2R4             | NA                      | NA                                                           | NA | NA          | NA |
| chr9 | 1.33E+08 | 1.33E+08 | A     | -         | UTR3         | FNBP1              | NA                      | NA                                                           | NA | rs5900873   | NA |
| chr9 | 1.34E+08 | 1.34E+08 | G     | A         | exonic       | PRRC2B             | synonymous SNV          | PRRC2B:NM_013318:exon15:c.G4254A:p.K1418K                    | NA | rs78591540  | NA |
| chr9 | 1.35E+08 | 1.35E+08 | C     | T         | UTR3         | NTNG2              | NA                      | NA                                                           | NA | NA          | NA |
| chr9 | 1.36E+08 | 1.36E+08 | C     | T         | UTR3         | ABO                | NA                      | NA                                                           | NA | rs62641782  | NA |
| chr9 | 1.36E+08 | 1.36E+08 | T     | G         | UTR3         | ABO                | NA                      | NA                                                           | NA | rs199555421 | NA |
| chr9 | 1.36E+08 | 1.36E+08 | T     | G         | UTR3         | ABO                | NA                      | NA                                                           | NA | NA          | NA |
| chr9 | 1.36E+08 | 1.36E+08 | A     | C         | exonic       | ABO                | unknown                 | UNKNOWN                                                      | NA | rs688976    | NA |
| chr9 | 1.36E+08 | 1.36E+08 | TGTTG | -         | UTR3         | CACFD1             | NA                      | NA                                                           | NA | NA          | NA |
| chr9 | 1.36E+08 | 1.36E+08 | G     | T         | UTR5         | ADAMTSL2           | NA                      | NA                                                           | NA | NA          | NA |
| chr9 | 1.38E+08 | 1.38E+08 | T     | C         | exonic       | OLFM1              | synonymous SNV          | NM_006334:exon2:c.T183C:p.A61A,OLFM1:NM_014279:exon2:c.T183C | NA | rs500461    | NA |
| chr9 | 1.38E+08 | 1.38E+08 | T     | C         | exonic       | OBP2A              | nonsynonymous SNV       | OBP2A:NM_014582:exon6:c.T503C:p.L168P                        | NA | rs117518871 | B  |
| chr9 | 1.38E+08 | 1.38E+08 | C     | T         | UTR5         | PAEP               | NA                      | NA                                                           | NA | rs3748205   | NA |



|       |          |          |          |           |              |           |                   |                                                               |                                  |             |    |
|-------|----------|----------|----------|-----------|--------------|-----------|-------------------|---------------------------------------------------------------|----------------------------------|-------------|----|
| chr9  | 1.39E+08 | 1.39E+08 | ACAC     | -         | UTR3         | QSOX2     | NA                | NA                                                            | NA                               | rs146198713 | NA |
| chr9  | 1.39E+08 | 1.39E+08 | G        | A         | exonic       | NOTCH1    | synonymous SNV    | NOTCH1:NM_017617:exon34:c.C6555T:p.D2185D                     | NA                               | rs2229974   | NA |
| chr9  | 1.39E+08 | 1.39E+08 | A        | G         | exonic       | NOTCH1    | synonymous SNV    | NOTCH1:NM_017617:exon3:c.T312C:p.N104N                        | NA                               | rs4489420   | NA |
| chr9  | 1.4E+08  | 1.4E+08  | A        | G         | exonic       | KIAA1984  | nonsynonymous SNV | KIAA1984:NM_001039374:exon10:c.A1070G:p.E357G                 | NA                               | NA          | P  |
| chr9  | 1.41E+08 | 1.41E+08 | A        | T         | exonic       | CACNA1B   | synonymous SNV    | 00718:exon11:c.A1488T:p.T496T,CACNA1B:NM_001243812:exon11:c.  | NA                               | rs2229951   | NA |
| chr9  | 1.41E+08 | 1.41E+08 | TG       | -         | UTR3         | CACNA1B   | NA                | NA                                                            | NA                               | rs5901129   | NA |
| chr9  | 1.41E+08 | 1.41E+08 | T        | C         | ncRNA_exonic | TUBBP5    | NA                | NA                                                            | OSM1107244;OCCURENCE=1(endometri | rs62581042  | NA |
| chr9  | 1.41E+08 | 1.41E+08 | G        | C         | ncRNA_exonic | TUBBP5    | NA                | NA                                                            | D=COSM487278;OCCURENCE=1(kidney  | NA          | NA |
| chr10 | 1209495  | 1209495  | G        | C         | ncRNA_exonic | LINC00200 | NA                | NA                                                            | NA                               | rs11250303  | NA |
| chr10 | 5136651  | 5136651  | C        | G         | exonic       | AKR1C3    | nonsynonymous SNV | 4M_001253909:exon1:c.C15G:p.H5Q,AKR1C3:NM_003739:exon1:c.C1   | NA                               | rs12529     | NA |
| chr10 | 6053568  | 6053568  | C        | T         | UTR3         | IL2RA     | NA                | NA                                                            | NA                               | rs1570538   | NA |
| chr10 | 6131411  | 6131411  | -        | TCC       | UTR5         | RBM17     | NA                | NA                                                            | NA                               | rs151234895 | NA |
| chr10 | 6157836  | 6157839  | AAAA     | -         | UTR3         | RBM17     | NA                | NA                                                            | NA                               | rs71390125  | NA |
| chr10 | 6159016  | 6159016  | -        | ATGCTGAA1 | UTR3         | RBM17     | NA                | NA                                                            | NA                               | NA          | NA |
| chr10 | 6159018  | 6159018  | T        | A         | UTR3         | RBM17     | NA                | NA                                                            | NA                               | rs41295371  | NA |
| chr10 | 6159018  | 6159018  | -        | \CAAGGAC  | UTR3         | RBM17     | NA                | NA                                                            | NA                               | NA          | NA |
| chr10 | 8094861  | 8094861  | G        | -         | ncRNA_exonic | GATA3-AS1 | NA                | NA                                                            | NA                               | rs35877776  | NA |
| chr10 | 11375079 | 11375090 | CCCTCTCA | -         | UTR3         | CELF2     | NA                | NA                                                            | NA                               | rs3841462   | NA |
| chr10 | 11997298 | 11997298 | G        | T         | exonic       | UPF2      | nonsynonymous SNV | _015542:exon14:c.C2783A:p.T928K,UPF2:NM_080599:exon14:c.C2783 | NA                               | NA          | D  |
| chr10 | 12875917 | 12875917 | A        | -         | ncRNA_exonic | LOC283070 | NA                | NA                                                            | NA                               | NA          | NA |
| chr10 | 13252313 | 13252313 | -        | A         | UTR3         | MCM10     | NA                | NA                                                            | NA                               | NA          | NA |
| chr10 | 17216556 | 17216556 | C        | T         | exonic       | TRDMT1    | synonymous SNV    | TRDMT1:NM_004412:exon2:c.G168A:p.T56T                         | NA                               | rs2273734   | NA |
| chr10 | 18088648 | 18088648 | A        | G         | intronic     | MRC1      | NA                | NA                                                            | NA                               | rs142746617 | NA |
| chr10 | 18088986 | 18088986 | C        | A         | intronic     | MRC1      | NA                | NA                                                            | NA                               | NA          | NA |
| chr10 | 18689587 | 18689587 | C        | -         | UTR5         | CACNB2    | NA                | NA                                                            | NA                               | NA          | NA |
| chr10 | 18830669 | 18830669 | T        | C         | UTR3         | CACNB2    | NA                | NA                                                            | NA                               | rs7079776   | NA |
| chr10 | 21803421 | 21803421 | -        | A         | UTR3         | SKIDA1    | NA                | NA                                                            | NA                               | NA          | NA |
| chr10 | 21807470 | 21807470 | A        | -         | UTR5         | SKIDA1    | NA                | NA                                                            | NA                               | rs111265769 | NA |
| chr10 | 21807780 | 21807781 | TT       | -         | UTR5         | SKIDA1    | NA                | NA                                                            | NA                               | NA          | NA |
| chr10 | 22825596 | 22825596 | C        | T         | UTR3         | PIP4K2A   | NA                | NA                                                            | NA                               | rs1048244   | NA |
| chr10 | 23983777 | 23983777 | G        | T         | UTR5         | KIAA1217  | NA                | NA                                                            | NA                               | rs12772432  | NA |
| chr10 | 25271270 | 25271270 | G        | A         | UTR3         | ENKUR     | NA                | NA                                                            | NA                               | rs2307047   | NA |
| chr10 | 28908890 | 28908890 | A        | -         | UTR3         | WAC       | NA                | NA                                                            | NA                               | NA          | NA |
| chr10 | 29801764 | 29801764 | T        | C         | exonic       | SVIL      | nonsynonymous SNV | 03174:exon15:c.A2138G:p.E713G,SVIL:NM_021738:exon17:c.A3416G  | NA                               | NA          | D  |
| chr10 | 31816340 | 31816340 | -        | AC        | UTR3         | ZEB1      | NA                | NA                                                            | NA                               | rs143911186 | NA |
| chr10 | 38739199 | 38739199 | A        | G         | ncRNA_exonic | LOC399744 | NA                | NA                                                            | NA                               | rs17611580  | NA |
| chr10 | 45496046 | 45496046 | C        | A         | exonic       | C10orf25  | stopgain SNV      | C10orf25:NM_001039380:exon1:c.G262T:p.E88X                    | NA                               | NA          | NA |
| chr10 | 45649377 | 45649377 | A        | C         | ncRNA_exonic | RSU1P2    | NA                | NA                                                            | NA                               | rs11239368  | NA |
| chr10 | 46248649 | 46248649 | T        | C         | exonic       | FAM21C    | nonsynonymous SNV | !c:p.S358P,FAM21C:NM_001169106:exon13:c.T1144C:p.S382P,FAM21  | NA                               | rs184073575 | NA |
| chr10 | 46961964 | 46961964 | G        | A         | UTR3         | SYT15     | NA                | NA                                                            | NA                               | rs138447966 | NA |
| chr10 | 46963951 | 46963951 | G        | A         | exonic       | SYT15     | synonymous SNV    | 4_031912:exon7:c.C1012T:p.L338L,SYT15:NM_181519:exon7:c.C1012 | NA                               | rs55945664  | NA |
| chr10 | 47000508 | 47000508 | G        | A         | UTR3         | GPRIN2    | NA                | NA                                                            | NA                               | rs61840973  | NA |
| chr10 | 47420856 | 47420856 | G        | A         | ncRNA_exonic | FAM35DP   | NA                | NA                                                            | NA                               | rs1832163   | NA |
| chr10 | 50310251 | 50310251 | T        | C         | UTR3         | VSTM4     | NA                | NA                                                            | NA                               | rs4240499   | NA |
| chr10 | 50966445 | 50966445 | C        | A         | exonic       | OGDHL     | nonsynonymous SNV | M_001143996:exon2:c.G194T:p.S65I,OGDHL:NM_018245:exon2:c.G19  | NA                               | NA          | D  |
| chr10 | 51226439 | 51226439 | T        | G         | exonic       | AGAP8     | nonsynonymous SNV | C:p.K181N,AGAP8:NM_001276344:exon7:c.A543C:p.K181N,AGAP8:NM   | NA                               | rs201124655 | B  |
| chr10 | 51748584 | 51748584 | A        | G         | exonic       | AGAP6     | nonsynonymous SNV | AGAP6:NM_001077665:exon1:c.A109G:p.R37G                       | NA                               | rs200504295 | NA |
| chr10 | 60474828 | 60474828 | A        | -         | ncRNA_exonic | FAM133CP  | NA                | NA                                                            | NA                               | NA          | NA |
| chr10 | 62544601 | 62544601 | G        | T         | exonic       | CDK1      | nonsynonymous SNV | VM_001170407:exon3:c.G176T:p.R59L,CDK1:NM_001786:exon3:c.G17  | NA                               | NA          | B  |
| chr10 | 63955366 | 63955381 | GAAGGAAC | -         | UTR3         | RTKN2     | NA                | NA                                                            | NA                               | NA          | NA |
| chr10 | 70451264 | 70451264 | A        | C         | exonic       | TET1      | nonsynonymous SNV | TET1:NM_030625:exon12:c.A6104C:p.H2035P                       | NA                               | NA          | D  |
| chr10 | 71267385 | 71267385 | G        | T         | UTR3         | TSPAN15   | NA                | NA                                                            | NA                               | NA          | NA |
| chr10 | 72187716 | 72187716 | T        | -         | UTR3         | EIF4EBP2  | NA                | NA                                                            | NA                               | NA          | NA |
| chr10 | 73059787 | 73059788 | TG       | -         | UTR3         | UNC5B     | NA                | NA                                                            | NA                               | NA          | NA |
| chr10 | 73994765 | 73994765 | T        | C         | UTR3         | ANAPC16   | NA                | NA                                                            | NA                               | rs6480601   | NA |
| chr10 | 79741920 | 79741920 | T        | G         | exonic       | POLR3A    | nonsynonymous SNV | POLR3A:NM_007055:exon28:c.A3751C:p.T1251P                     | NA                               | NA          | P  |
| chr10 | 81114959 | 81114959 | C        | T         | UTR3         | PPIF      | NA                | NA                                                            | NA                               | rs7898      | NA |
| chr10 | 81374986 | 81374986 | T        | C         | UTR3         | SFTPA1    | NA                | NA                                                            | NA                               | rs1059225   | NA |
| chr10 | 88494752 | 88494752 | A        | -         | UTR3         | LDB3      | NA                | NA                                                            | NA                               | rs11314847  | NA |
| chr10 | 88677045 | 88677045 | T        | A         | exonic       | BMPR1A    | nonsynonymous SNV | BMPR1A:NM_004329:exon9:c.T830A:p.I277N                        | NA                               | NA          | D  |
| chr10 | 88810338 | 88810338 | A        | -         | UTR3         | GLUD1     | NA                | NA                                                            | NA                               | NA          | NA |
| chr10 | 89125529 | 89125529 | G        | C         | ncRNA_exonic | NUTM2D    | NA                | NA                                                            | NA                               | rs2767120   | D  |
| chr10 | 89127702 | 89127702 | G        | T         | ncRNA_exonic | NUTM2D    | NA                | NA                                                            | NA                               | rs3128215   | NA |
| chr10 | 89128214 | 89128214 | G        | A         | ncRNA_exonic | NUTM2D    | NA                | NA                                                            | NA                               | rs77989216  | NA |
| chr10 | 89129516 | 89129516 | G        | A         | ncRNA_exonic | NUTM2D    | NA                | NA                                                            | NA                               | rs143548709 | NA |
| chr10 | 89264593 | 89264593 | C        | G         | UTR5         | MINPP1    | NA                | NA                                                            | NA                               | rs2233166   | NA |

|       |          |          |          |      |        |          |                     |                                                                                          |                                 |             |    |
|-------|----------|----------|----------|------|--------|----------|---------------------|------------------------------------------------------------------------------------------|---------------------------------|-------------|----|
| chr10 | 89619806 | 89619806 | G        | A    | UTR3   | KLLN     | NA                  | NA                                                                                       | NA                              | NA          | NA |
| chr10 | 89726612 | 89726612 | G        | A    | UTR3   | PTEN     | NA                  | NA                                                                                       | NA                              | NA          | NA |
| chr10 | 89726652 | 89726652 | G        | A    | UTR3   | PTEN     | NA                  | NA                                                                                       | NA                              | NA          | NA |
| chr10 | 99192863 | 99192863 | -        | ATAA | UTR3   | PGAM1    | NA                  | NA                                                                                       | NA                              | NA          | NA |
| chr10 | 99192913 | 99192913 | G        | A    | UTR3   | PGAM1    | NA                  | NA                                                                                       | NA                              | NA          | NA |
| chr10 | 99435869 | 99435869 | G        | A    | UTR3   | PI4K2A   | NA                  | NA                                                                                       | NA                              | rs7084287   | NA |
| chr10 | 1.01E+08 | 1.01E+08 | T        | G    | UTR5   | COX15    | NA                  | NA                                                                                       | NA                              | rs2281636   | NA |
| chr10 | 1.02E+08 | 1.02E+08 | GTGTGTGT | -    | UTR3   | HIF1AN   | NA                  | NA                                                                                       | NA                              | NA          | NA |
| chr10 | 1.02E+08 | 1.02E+08 | G        | T    | UTR3   | HIF1AN   | NA                  | NA                                                                                       | NA                              | NA          | NA |
| chr10 | 1.03E+08 | 1.03E+08 | G        | A    | UTR3   | SFXN3    | NA                  | NA                                                                                       | NA                              | rs184783122 | NA |
| chr10 | 1.04E+08 | 1.04E+08 | C        | T    | exonic | MGEA5    | nonsynonymous SNV   | 4_001142434:exon1:c.G151A:p.A51T,MGEA5:NM_012215:exon1:c.G1!                             | NA                              | rs35402016  | B  |
| chr10 | 1.04E+08 | 1.04E+08 | G        | T    | exonic | FBXL15   | nonsynonymous SNV   | FBXL15:NM_024326:exon4:c.G886T:p.V296F                                                   | NA                              | NA          | P  |
| chr10 | 1.05E+08 | 1.05E+08 | T        | G    | UTR3   | WBP1L    | NA                  | NA                                                                                       | NA                              | rs284854    | NA |
| chr10 | 1.05E+08 | 1.05E+08 | C        | T    | exonic | CNNM2    | synonymous SNV      | l_199076:exon6:c.C2244T:p.A748A,CNNM2:NM_017649:exon7:c.C231                             | NA                              | rs943037    | NA |
| chr10 | 1.05E+08 | 1.05E+08 | A        | T    | UTR3   | SH3PXD2A | NA                  | NA                                                                                       | NA                              | rs28516372  | NA |
| chr10 | 1.12E+08 | 1.12E+08 | A        | -    | UTR3   | ADD3     | NA                  | NA                                                                                       | NA                              | NA          | NA |
| chr10 | 1.15E+08 | 1.15E+08 | T        | C    | UTR5   | HABP2    | NA                  | NA                                                                                       | NA                              | rs2240879   | NA |
| chr10 | 1.16E+08 | 1.16E+08 | C        | T    | exonic | PLEKHS1  | nonsynonymous SNV   | .82601:exon10:c.C1024T:p.R342W,PLEKHS1:NM_001193434:exon11:c                             | NA                              | rs118170787 | D  |
| chr10 | 1.16E+08 | 1.16E+08 | CCTTCCC  | -    | UTR3   | PLEKHS1  | NA                  | NA                                                                                       | NA                              | NA          | NA |
| chr10 | 1.16E+08 | 1.16E+08 | C        | A    | UTR3   | PLEKHS1  | NA                  | NA                                                                                       | NA                              | NA          | NA |
| chr10 | 1.16E+08 | 1.16E+08 | T        | C    | UTR3   | PLEKHS1  | NA                  | NA                                                                                       | NA                              | NA          | NA |
| chr10 | 1.16E+08 | 1.16E+08 | C        | T    | UTR3   | ADRB1    | NA                  | NA                                                                                       | NA                              | NA          | NA |
| chr10 | 1.17E+08 | 1.17E+08 | G        | T    | exonic | ATRNL1   | nonsynonymous SNV   | ATRNL1:NM_207303:exon19:c.G3175T:p.A1059S                                                | NA                              | NA          | B  |
| chr10 | 1.18E+08 | 1.18E+08 | -        | TG   | UTR3   | GFRA1    | NA                  | NA                                                                                       | NA                              | NA          | NA |
| chr10 | 1.18E+08 | 1.18E+08 | T        | A    | UTR3   | GFRA1    | NA                  | NA                                                                                       | NA                              | rs142941024 | NA |
| chr10 | 1.18E+08 | 1.18E+08 | T        | A    | UTR3   | GFRA1    | NA                  | NA                                                                                       | NA                              | rs145714787 | NA |
| chr10 | 1.18E+08 | 1.18E+08 | C        | G    | UTR3   | GFRA1    | NA                  | NA                                                                                       | NA                              | rs117805221 | NA |
| chr10 | 1.2E+08  | 1.2E+08  | -        | A    | UTR3   | CACUL1   | NA                  | NA                                                                                       | NA                              | NA          | NA |
| chr10 | 1.21E+08 | 1.21E+08 | C        | A    | UTR3   | TIAL1    | NA                  | NA                                                                                       | NA                              | rs111740135 | NA |
| chr10 | 1.23E+08 | 1.23E+08 | C        | G    | UTR5   | FGFR2    | NA                  | NA                                                                                       | NA                              | rs1047111   | NA |
| chr10 | 1.27E+08 | 1.27E+08 | T        | A    | UTR3   | CTBP2    | NA                  | NA                                                                                       | NA                              | NA          | NA |
| chr10 | 1.27E+08 | 1.27E+08 | T        | A    | UTR3   | CTBP2    | NA                  | NA                                                                                       | NA                              | NA          | NA |
| chr10 | 1.27E+08 | 1.27E+08 | A        | G    | UTR3   | CTBP2    | NA                  | NA                                                                                       | NA                              | rs76017768  | NA |
| chr10 | 1.27E+08 | 1.27E+08 | A        | G    | UTR3   | CTBP2    | NA                  | NA                                                                                       | NA                              | rs78209416  | NA |
| chr10 | 1.27E+08 | 1.27E+08 | T        | C    | UTR3   | CTBP2    | NA                  | NA                                                                                       | NA                              | rs75330281  | NA |
| chr10 | 1.27E+08 | 1.27E+08 | T        | G    | UTR3   | CTBP2    | NA                  | NA                                                                                       | NA                              | rs78608514  | NA |
| chr10 | 1.27E+08 | 1.27E+08 | A        | C    | UTR3   | CTBP2    | NA                  | NA                                                                                       | NA                              | NA          | NA |
| chr10 | 1.27E+08 | 1.27E+08 | G        | C    | UTR3   | CTBP2    | NA                  | NA                                                                                       | NA                              | rs3208596   | NA |
| chr10 | 1.27E+08 | 1.27E+08 | T        | -    | exonic | CTBP2    | frameshift deletion | _001083914:exon3:c.57delA:p.E19fs,CTBP2:NM_001329:exon3:c.57delA                         | NA                              | NA          | NA |
| chr10 | 1.28E+08 | 1.28E+08 | G        | C    | UTR5   | FANK1    | NA                  | NA                                                                                       | NA                              | rs80288044  | NA |
| chr10 | 1.28E+08 | 1.28E+08 | C        | A    | UTR5   | FANK1    | NA                  | NA                                                                                       | NA                              | rs74162870  | NA |
| chr10 | 1.3E+08  | 1.3E+08  | T        | C    | UTR3   | FOXI2    | NA                  | NA                                                                                       | NA                              | NA          | NA |
| chr10 | 1.3E+08  | 1.3E+08  | T        | C    | UTR3   | FOXI2    | NA                  | NA                                                                                       | NA                              | NA          | NA |
| chr10 | 1.31E+08 | 1.31E+08 | C        | T    | exonic | MGMT     | synonymous SNV      | MGMT:NM_002412:exon1:c.C66T:p.R22R                                                       | NA                              | rs16906252  | NA |
| chr10 | 1.34E+08 | 1.34E+08 | G        | A    | exonic | JAKMIP3  | synonymous SNV      | JAKMIP3:NM_001105521:exon1:c.G108A:p.Q36Q                                                | NA                              | rs11146177  | NA |
| chr10 | 1.34E+08 | 1.34E+08 | A        | G    | exonic | DPYSL4   | nonsynonymous SNV   | DPYSL4:NM_006426:exon8:c.A773G:p.K258R                                                   | NA                              | NA          | B  |
| chr10 | 1.34E+08 | 1.34E+08 | G        | T    | UTR3   | LRRC27   | NA                  | NA                                                                                       | NA                              | rs10870302  | NA |
| chr10 | 1.34E+08 | 1.34E+08 | A        | T    | UTR3   | LRRC27   | NA                  | NA                                                                                       | NA                              | NA          | NA |
| chr10 | 1.34E+08 | 1.34E+08 | C        | T    | UTR3   | LRRC27   | NA                  | NA                                                                                       | NA                              | NA          | NA |
| chr10 | 1.35E+08 | 1.35E+08 | A        | G    | exonic | GPR123   | synonymous SNV      | GPR123:NM_001083909:exon7:c.A834G:p.S278S                                                | NA                              | rs2806452   | NA |
| chr10 | 1.35E+08 | 1.35E+08 | A        | C    | exonic | SYCE1    | nonsynonymous SNV   | M_001143763:exon1:c.T13G:p.S5A,SYCE1:NM_001143764:exon1:c.T13G                           | NA                              | NA          | NA |
| chr10 | 1.35E+08 | 1.35E+08 | G        | A    | UTR5   | FRG2B    | NA                  | NA                                                                                       | NA                              | rs199872228 | NA |
| chr11 | 203335   | 203335   | A        | G    | UTR3   | BET1L    | NA                  | NA                                                                                       | NA                              | NA          | NA |
| chr11 | 610277   | 610277   | T        | C    | exonic | PHRF1    | nonsynonymous SNV   | PHRF1:NM_020901:exon15:c.T4343C:p.V1448A                                                 | NA                              | rs11246212  | NA |
| chr11 | 621242   | 621242   | C        | T    | exonic | CDHR5    | synonymous SNV      | 627A:p.P209P,CDHR5:NM_021924:exon7:c.G627A:p.P209P,CDHR5:NM_021924:exon7:c.G627A:p.P209P | NA                              | rs112269777 | NA |
| chr11 | 1016559  | 1016559  | G        | C    | exonic | MUC6     | nonsynonymous SNV   | MUC6:NM_005961:exon31:c.C6242G:p.A2081G                                                  | NA                              | NA          | NA |
| chr11 | 1016756  | 1016756  | G        | A    | exonic | MUC6     | synonymous SNV      | MUC6:NM_005961:exon31:c.C6045T:p.S2015S                                                  | NA                              | NA          | NA |
| chr11 | 1016919  | 1016919  | C        | T    | exonic | MUC6     | nonsynonymous SNV   | MUC6:NM_005961:exon31:c.G5882A:p.R1961K                                                  | NA                              | NA          | NA |
| chr11 | 1016960  | 1016960  | G        | T    | exonic | MUC6     | synonymous SNV      | MUC6:NM_005961:exon31:c.C5841A:p.T1947T                                                  | NA                              | rs113980831 | NA |
| chr11 | 1017041  | 1017041  | G        | T    | exonic | MUC6     | stopgain SNV        | MUC6:NM_005961:exon31:c.C5760A:p.Y1920X                                                  | NA                              | rs75482640  | NA |
| chr11 | 1017042  | 1017042  | T        | G    | exonic | MUC6     | nonsynonymous SNV   | MUC6:NM_005961:exon31:c.A5759C:p.Y1920S                                                  | NA                              | rs80049949  | NA |
| chr11 | 1017068  | 1017068  | C        | T    | exonic | MUC6     | synonymous SNV      | MUC6:NM_005961:exon31:c.G5733A:p.T1911T                                                  | NA                              | rs78992004  | NA |
| chr11 | 1017277  | 1017277  | A        | G    | exonic | MUC6     | nonsynonymous SNV   | MUC6:NM_005961:exon31:c.T5524C:p.S1842P                                                  | NA                              | rs111373859 | NA |
| chr11 | 1017381  | 1017381  | G        | C    | exonic | MUC6     | nonsynonymous SNV   | MUC6:NM_005961:exon31:c.C5420G:p.T1807S                                                  | COSM1180594;OCCURENCE=1(upper_a | rs34912894  | NA |
| chr11 | 1017440  | 1017440  | C        | T    | exonic | MUC6     | synonymous SNV      | MUC6:NM_005961:exon31:c.G5361A:p.S1787S                                                  | NA                              | rs78729877  | NA |
| chr11 | 1017483  | 1017483  | T        | G    | exonic | MUC6     | nonsynonymous SNV   | MUC6:NM_005961:exon31:c.A5318C:p.H1773P                                                  | NA                              | rs79986665  | NA |

|       |          |          |          |   |              |           |                   |                                                                                             |                                 |             |    |
|-------|----------|----------|----------|---|--------------|-----------|-------------------|---------------------------------------------------------------------------------------------|---------------------------------|-------------|----|
| chr11 | 1018048  | 1018048  | A        | T | exonic       | MUC6      | nonsynonymous SNV | MUC6:NM_005961:exon31:c.T4753A:p.F1585I                                                     | NA                              | rs12787400  | NA |
| chr11 | 1018090  | 1018090  | G        | T | exonic       | MUC6      | nonsynonymous SNV | MUC6:NM_005961:exon31:c.C4711A:p.P1571T                                                     | NA                              | rs201615772 | NA |
| chr11 | 1018290  | 1018290  | G        | A | exonic       | MUC6      | nonsynonymous SNV | MUC6:NM_005961:exon31:c.C4511T:p.P1504L                                                     | NA                              | NA          | NA |
| chr11 | 1018341  | 1018341  | G        | A | exonic       | MUC6      | nonsynonymous SNV | MUC6:NM_005961:exon31:c.C4460T:p.P1487L                                                     | NA                              | rs79748612  | NA |
| chr11 | 1088835  | 1088835  | C        | T | exonic       | MUC2      | nonsynonymous SNV | MUC2:NM_002457:exon26:c.C3620T:p.T1207I                                                     | NA                              | rs41389046  | NA |
| chr11 | 1090928  | 1090928  | A        | C | exonic       | MUC2      | nonsynonymous SNV | MUC2:NM_002457:exon28:c.A3823C:p.T1275P                                                     | NA                              | NA          | NA |
| chr11 | 1090937  | 1090937  | A        | C | exonic       | MUC2      | nonsynonymous SNV | MUC2:NM_002457:exon28:c.A3832C:p.T1278P                                                     | NA                              | NA          | NA |
| chr11 | 1093452  | 1093452  | G        | A | exonic       | MUC2      | synonymous SNV    | MUC2:NM_002457:exon30:c.G5271A:p.P1757P                                                     | 1127915,COSM1127916;OCCURENCE=1 | rs34136803  | NA |
| chr11 | 1266630  | 1266630  | G        | A | exonic       | MUC5B     | synonymous SNV    | MUC5B:NM_002458:exon31:c.G8520A:p.T2840T                                                    | NA                              | rs200570144 | NA |
| chr11 | 1269500  | 1269500  | T        | C | exonic       | MUC5B     | nonsynonymous SNV | MUC5B:NM_002458:exon31:c.T11390C:p.I3797T                                                   | NA                              | NA          | NA |
| chr11 | 1271763  | 1271763  | A        | C | exonic       | MUC5B     | synonymous SNV    | MUC5B:NM_002458:exon31:c.A13653C:p.T4551T                                                   | 52309,COSM924786;OCCURENCE=1(en | NA          | NA |
| chr11 | 1575385  | 1575385  | C        | G | UTR3         | DUSP8     | NA                | NA                                                                                          | NA                              | NA          | NA |
| chr11 | 1605919  | 1605919  | G        | A | exonic       | KRTAP5-1  | synonymous SNV    | KRTAP5-1:NM_001005922:exon1:c.C561T:p.C187C                                                 | NA                              | NA          | NA |
| chr11 | 1606120  | 1606120  | A        | G | exonic       | KRTAP5-1  | synonymous SNV    | KRTAP5-1:NM_001005922:exon1:c.T360C:p.G120G                                                 | NA                              | rs189753959 | NA |
| chr11 | 1606166  | 1606166  | G        | C | exonic       | KRTAP5-1  | nonsynonymous SNV | KRTAP5-1:NM_001005922:exon1:c.C314G:p.S105C                                                 | NA                              | NA          | NA |
| chr11 | 1643036  | 1643036  | A        | C | exonic       | KRTAP5-4  | synonymous SNV    | KRTAP5-4:NM_001012709:exon1:c.T288G:p.G96G                                                  | NA                              | rs58877168  | NA |
| chr11 | 1705485  | 1705485  | T        | C | ncRNA_exonic | FAM99B    | NA                | NA                                                                                          | NA                              | rs201023952 | NA |
| chr11 | 2696063  | 2696063  | A        | - | ncRNA_exonic | KCNQ1OT1  | NA                | NA                                                                                          | NA                              | rs34219164  | NA |
| chr11 | 2720927  | 2720927  | C        | T | ncRNA_exonic | KCNQ1OT1  | NA                | NA                                                                                          | NA                              | rs12360708  | NA |
| chr11 | 3663224  | 3663224  | G        | A | UTR5         | ART5      | NA                | NA                                                                                          | NA                              | rs115012337 | NA |
| chr11 | 6550309  | 6550309  | G        | A | exonic       | DNHD1     | nonsynonymous SNV | DNHD1:NM_144666:exon12:c.G2305A:p.G769R                                                     | NA                              | rs2344829   | NA |
| chr11 | 6566762  | 6566762  | T        | G | exonic       | DNHD1     | synonymous SNV    | DNHD1:NM_144666:exon21:c.T4593G:p.G1531G                                                    | NA                              | NA          | NA |
| chr11 | 6633033  | 6633033  | A        | C | exonic       | TAF10     | synonymous SNV    | TAF10:NM_006284:exon2:c.T249G:p.G83G                                                        | NA                              | NA          | NA |
| chr11 | 6634189  | 6634189  | G        | A | UTR3         | TPP1      | NA                | NA                                                                                          | NA                              | rs7487      | NA |
| chr11 | 7439264  | 7439264  | C        | T | exonic       | SYT9      | synonymous SNV    | SYT9:NM_175733:exon5:c.C1242T:p.T414T                                                       | )-COSM147136;OCCURENCE=1(stomac | rs34058874  | NA |
| chr11 | 8126477  | 8126477  | G        | T | UTR3         | TUB       | NA                | NA                                                                                          | NA                              | rs55774312  | NA |
| chr11 | 8159892  | 8159892  | G        | T | exonic       | RIC3      | synonymous SNV    | 354A:p.L118L,RIC3:NM_001206672:exon3:c.C354A:p.L118L,RIC3:NM_                               | NA                              | rs10839976  | NA |
| chr11 | 9304488  | 9304488  | A        | - | UTR3         | TMEM41B   | NA                | NA                                                                                          | NA                              | rs56313114  | NA |
| chr11 | 11863526 | 11863526 | G        | T | UTR5         | USP47     | NA                | NA                                                                                          | NA                              | rs28364721  | NA |
| chr11 | 18287918 | 18287918 | -        | A | UTR5         | SAA1      | NA                | NA                                                                                          | NA                              | rs200069063 | NA |
| chr11 | 18477413 | 18477428 | ACCTGCCA | - | UTR5         | LDHAL6A   | NA                | NA                                                                                          | NA                              | rs140456495 | NA |
| chr11 | 21555994 | 21555994 | C        | A | exonic       | NELL1     | nonsynonymous SNV | NELL1:NM_006157:exon16:c.C1720A:p.H574N                                                     | NA                              | NA          | D  |
| chr11 | 26581383 | 26581384 | AC       | - | UTR3         | MUC15     | NA                | NA                                                                                          | NA                              | NA          | NA |
| chr11 | 26690764 | 26690764 | T        | C | UTR3         | SLC5A12   | NA                | NA                                                                                          | NA                              | NA          | NA |
| chr11 | 32875438 | 32875440 | AGG      | - | UTR3         | PRRG4     | NA                | NA                                                                                          | NA                              | rs144258001 | NA |
| chr11 | 33061642 | 33061642 | G        | - | UTR5         | TCP11L1   | NA                | NA                                                                                          | NA                              | rs201592406 | NA |
| chr11 | 33061647 | 33061647 | A        | T | UTR5         | TCP11L1   | NA                | NA                                                                                          | NA                              | rs74889474  | NA |
| chr11 | 33094974 | 33094974 | T        | G | UTR3         | TCP11L1   | NA                | NA                                                                                          | NA                              | NA          | NA |
| chr11 | 33097887 | 33097887 | G        | T | ncRNA_exonic | LINC00294 | NA                | NA                                                                                          | NA                              | NA          | NA |
| chr11 | 33757941 | 33757941 | A        | G | UTR5         | CD59      | NA                | NA                                                                                          | NA                              | rs13614     | NA |
| chr11 | 35829803 | 35829803 | G        | A | UTR3         | TRIM44    | NA                | NA                                                                                          | NA                              | NA          | NA |
| chr11 | 45263072 | 45263072 | A        | C | UTR3         | SYT13     | NA                | NA                                                                                          | NA                              | rs12283527  | NA |
| chr11 | 46383244 | 46383244 | C        | A | UTR5         | DGKZ      | NA                | NA                                                                                          | NA                              | NA          | NA |
| chr11 | 56959046 | 56959046 | T        | G | UTR3         | LRRC55    | NA                | NA                                                                                          | NA                              | NA          | NA |
| chr11 | 56959052 | 56959052 | T        | G | UTR3         | LRRC55    | NA                | NA                                                                                          | NA                              | NA          | NA |
| chr11 | 59811098 | 59811098 | G        | T | exonic       | PLAC1L    | nonsynonymous SNV | PLAC1L:NM_173801:exon2:c.G221T:p.R74L                                                       | NA                              | NA          | B  |
| chr11 | 61560372 | 61560372 | C        | T | UTR5         | FEN1      | NA                | NA                                                                                          | NA                              | NA          | NA |
| chr11 | 61567669 | 61567669 | T        | - | UTR3         | FADS1     | NA                | NA                                                                                          | NA                              | NA          | NA |
| chr11 | 62295933 | 62295933 | T        | C | exonic       | AHNAK     | nonsynonymous SNV | AHNAK:NM_001620:exon5:c.A5956G:p.T1986A                                                     | NA                              | NA          | B  |
| chr11 | 64004692 | 64004692 | C        | T | exonic       | VEGFB     | synonymous SNV    | _001243733:exon5:c.C408T:p.D136D,VEGFB:NM_003377:exon5:c.C409=COSM147267;OCCURENCE=1(stomac | rs12366035                      | NA          |    |
| chr11 | 64578162 | 64578162 | A        | G | UTR5         | MEN1      | NA                | NA                                                                                          | NA                              | NA          | NA |
| chr11 | 64806270 | 64806270 | C        | T | exonic       | SNX15     | synonymous SNV    | SNX15:NM_013306:exon7:c.C891T:p.D297D                                                       | NA                              | rs542175    | NA |
| chr11 | 65143541 | 65143543 | AAA      | - | UTR3         | SLC25A45  | NA                | NA                                                                                          | NA                              | NA          | NA |
| chr11 | 65563503 | 65563503 | A        | T | UTR3         | OVOL1     | NA                | NA                                                                                          | NA                              | rs67300439  | NA |
| chr11 | 66393069 | 66393069 | G        | C | exonic       | RBM14     | synonymous SNV    | RBM14:NM_006328:exon2:c.G1722C:p.P574P                                                      | NA                              | NA          | NA |
| chr11 | 67052439 | 67052439 | C        | G | exonic       | ADRBK1    | synonymous SNV    | ADRBK1:NM_001619:exon19:c.C1776G:p.G592G                                                    | NA                              | NA          | NA |
| chr11 | 68663993 | 68663993 | C        | T | exonic       | MRPL21    | nonsynonymous SNV | V_181514:exon4:c.G386A:p.R129Q,MRPL21:NM_181515:exon4:c.G13                                 | NA                              | rs143584803 | D  |
| chr11 | 68856916 | 68856916 | C        | T | UTR3         | TPCN2     | NA                | NA                                                                                          | NA                              | rs1005858   | NA |
| chr11 | 70281360 | 70281362 | TTT      | - | UTR3         | CTTN      | NA                | NA                                                                                          | NA                              | rs71992777  | NA |
| chr11 | 70281395 | 70281395 | A        | G | UTR3         | CTTN      | NA                | NA                                                                                          | NA                              | NA          | NA |
| chr11 | 70666765 | 70666765 | C        | T | exonic       | SHANK2    | unknown           | UNKNOWN                                                                                     | NA                              | rs11237599  | NA |
| chr11 | 71238668 | 71238668 | G        | A | exonic       | KRTAP5-7  | nonsynonymous SNV | KRTAP5-7:NM_001012503:exon1:c.G322A:p.G108R                                                 | NA                              | NA          | NA |
| chr11 | 71238669 | 71238669 | G        | A | exonic       | KRTAP5-7  | nonsynonymous SNV | KRTAP5-7:NM_001012503:exon1:c.G323A:p.G108E                                                 | NA                              | NA          | NA |
| chr11 | 71238760 | 71238760 | A        | C | exonic       | KRTAP5-7  | synonymous SNV    | KRTAP5-7:NM_001012503:exon1:c.A414C:p.S138S                                                 | NA                              | NA          | NA |
| chr11 | 71498591 | 71498591 | C        | G | exonic       | FAM86C1   | synonymous SNV    | n1:c.C9G:p.P3P,FAM86C1:NM_018172:exon1:c.C9G:p.P3P,FAM86C1:NM_                              | NA                              | rs12270466  | NA |
| chr11 | 71498601 | 71498601 | G        | T | exonic       | FAM86C1   | nonsynonymous SNV | l:c.G19T:p.A7S,FAM86C1:NM_018172:exon1:c.G19T:p.A7S,FAM86C1:l                               | NA                              | rs12283300  | P  |

|       |          |          |         |       |              |           |                      |                                                                 |                                  |             |    |
|-------|----------|----------|---------|-------|--------------|-----------|----------------------|-----------------------------------------------------------------|----------------------------------|-------------|----|
| chr11 | 71708250 | 71708251 | GT      | -     | UTR3         | RNF121    | NA                   | NA                                                              | NA                               | rs3841467   | NA |
| chr11 | 71715015 | 71715015 | -       | G     | exonic       | NUMA1     | frameshift insertion | NUMA1:NM_006185:exon26:c.6254_6255insC:p.R2085fs                | NA                               | NA          | NA |
| chr11 | 77811990 | 77811990 | T       | C     | ncRNA_UTR3   | ALG8      | NA                   | NA                                                              | NA                               | rs1263505   | NA |
| chr11 | 85968623 | 85968623 | C       | T     | exonic       | EED       | synonymous SNV       | IM_003797:exon6:c.C619T:p.L207L,EED:NM_152991:exon6:c.C619T:p.  | NA                               | rs974144    | NA |
| chr11 | 89537461 | 89537461 | G       | T     | exonic       | TRIM49    | synonymous SNV       | TRIM49:NM_020358:exon3:c.C177A:p.T59T                           | NA                               | rs585471    | NA |
| chr11 | 89701844 | 89701844 | T       | C     | exonic       | TRIM64    | nonsynonymous SNV    | TRIM64:NM_001136486:exon1:c.T173C:p.I58T                        | NA                               | rs145750208 | NA |
| chr11 | 89727291 | 89727291 | A       | G     | ncRNA_exonic | TRIM53AP  | NA                   | NA                                                              | NA                               | rs200877642 | NA |
| chr11 | 89732714 | 89732714 | C       | G     | ncRNA_exonic | TRIM53AP  | NA                   | NA                                                              | NA                               | rs201822208 | NA |
| chr11 | 93170919 | 93170919 | A       | C     | UTR3         | CCDC67    | NA                   | NA                                                              | NA                               | NA          | NA |
| chr11 | 93170925 | 93170925 | G       | A     | UTR3         | CCDC67    | NA                   | NA                                                              | NA                               | rs2605584   | NA |
| chr11 | 94134513 | 94134513 | G       | C     | UTR5         | GPR83     | NA                   | NA                                                              | NA                               | rs12791316  | NA |
| chr11 | 94803548 | 94803548 | G       | A     | UTR3         | SRSF8     | NA                   | NA                                                              | NA                               | rs201925344 | NA |
| chr11 | 94863488 | 94863488 | -       | T     | UTR3         | ENDOD1    | NA                   | NA                                                              | NA                               | NA          | NA |
| chr11 | 96126289 | 96126290 | TT      | -     | UTR3         | JRKL      | NA                   | NA                                                              | NA                               | NA          | NA |
| chr11 | 1.01E+08 | 1.01E+08 | T       | -     | UTR3         | PGR       | NA                   | NA                                                              | NA                               | NA          | NA |
| chr11 | 1.01E+08 | 1.01E+08 | C       | T     | UTR3         | PGR       | NA                   | NA                                                              | NA                               | rs11224560  | NA |
| chr11 | 1.01E+08 | 1.01E+08 | T       | G     | exonic       | PGR       | nonsynonymous SNV    | 3C:p.T430P,PGR:NM_001202474:exon1:c.A796C:p.T266P,PGR:NM_001    | NA                               | NA          | B  |
| chr11 | 1.01E+08 | 1.01E+08 | T       | G     | exonic       | PGR       | synonymous SNV       | 3C:p.P421P,PGR:NM_001202474:exon1:c.A771C:p.P257P,PGR:NM_001    | NA                               | NA          | NA |
| chr11 | 1.02E+08 | 1.02E+08 | T       | A     | UTR3         | KIAA1377  | NA                   | NA                                                              | NA                               | NA          | NA |
| chr11 | 1.06E+08 | 1.06E+08 | A       | C     | UTR3         | GRIA4     | NA                   | NA                                                              | NA                               | rs188861527 | NA |
| chr11 | 1.08E+08 | 1.08E+08 | A       | C     | UTR3         | SLC35F2   | NA                   | NA                                                              | NA                               | rs111576438 | NA |
| chr11 | 1.08E+08 | 1.08E+08 | C       | G     | UTR3         | RAB39A    | NA                   | NA                                                              | NA                               | rs1027733   | NA |
| chr11 | 1.08E+08 | 1.08E+08 | T       | -     | UTR3         | CUL5      | NA                   | NA                                                              | NA                               | rs67141256  | NA |
| chr11 | 1.08E+08 | 1.08E+08 | A       | G     | exonic       | EXPH5     | nonsynonymous SNV    | EXPH5:NM_015065:exon1:c.T71C:p.V24A                             | NA                               | NA          | D  |
| chr11 | 1.12E+08 | 1.12E+08 | G       | T     | UTR3         | C11orf57  | NA                   | NA                                                              | NA                               | NA          | NA |
| chr11 | 1.13E+08 | 1.13E+08 | C       | T     | UTR3         | NCAM1     | NA                   | NA                                                              | NA                               | NA          | NA |
| chr11 | 1.18E+08 | 1.18E+08 | CA      | -     | UTR3         | FXD6      | NA                   | NA                                                              | NA                               | rs57385031  | NA |
| chr11 | 1.18E+08 | 1.18E+08 | -       | T     | ncRNA_UTR3   | UBE4A     | NA                   | NA                                                              | NA                               | NA          | NA |
| chr11 | 1.19E+08 | 1.19E+08 | T       | C     | UTR3         | DDX6      | NA                   | NA                                                              | NA                               | NA          | NA |
| chr11 | 1.19E+08 | 1.19E+08 | A       | C     | UTR3         | DDX6      | NA                   | NA                                                              | NA                               | NA          | NA |
| chr11 | 1.19E+08 | 1.19E+08 | G       | A     | UTR3         | DDX6      | NA                   | NA                                                              | NA                               | rs76362677  | NA |
| chr11 | 1.2E+08  | 1.2E+08  | T       | C     | UTR3         | POU2F3    | NA                   | NA                                                              | NA                               | rs78221919  | NA |
| chr11 | 1.2E+08  | 1.2E+08  | C       | T     | UTR3         | POU2F3    | NA                   | NA                                                              | NA                               | rs4938797   | NA |
| chr11 | 1.2E+08  | 1.2E+08  | C       | T     | UTR3         | POU2F3    | NA                   | NA                                                              | NA                               | rs200901486 | NA |
| chr11 | 1.22E+08 | 1.22E+08 | -       | A     | ncRNA_exonic | MIR100HG  | NA                   | NA                                                              | NA                               | NA          | NA |
| chr11 | 1.26E+08 | 1.26E+08 | A       | G     | UTR3         | CDON      | NA                   | NA                                                              | NA                               | rs58515733  | NA |
| chr11 | 1.26E+08 | 1.26E+08 | A       | T     | UTR3         | CDON      | NA                   | NA                                                              | NA                               | rs58251767  | NA |
| chr11 | 1.26E+08 | 1.26E+08 | C       | A     | exonic       | CDON      | stopgain SNV         | _001243597:exon6:c.G928T:p.E310X,CDON:NM_016952:exon6:c.G928T   | NA                               | NA          | NA |
| chr11 | 1.29E+08 | 1.29E+08 | C       | T     | exonic       | C11orf45  | synonymous SNV       | _001256088:exon4:c.G438A:p.X146X,C11orf45:NM_145013:exon4:c.G   | NA                               | rs11221503  | NA |
| chr11 | 1.29E+08 | 1.29E+08 | GGTTTGT | -     | UTR3         | KCNJ5     | NA                   | NA                                                              | NA                               | rs36205004  | NA |
| chr11 | 1.3E+08  | 1.3E+08  | C       | T     | UTR3         | ZBTB44    | NA                   | NA                                                              | NA                               | NA          | NA |
| chr11 | 1.34E+08 | 1.34E+08 | T       | C     | intronic     | IGSF9B    | NA                   | NA                                                              | NA                               | rs12800905  | NA |
| chr12 | 498268   | 498269   | GG      | -     | UTR5         | KDM5A     | NA                   | NA                                                              | NA                               | NA          | NA |
| chr12 | 863076   | 863076   | T       | C     | exonic       | WNK1      | synonymous SNV       | NM_014823:exon1:c.T345C:p.A115A,WNK1:NM_018979:exon1:c.T345C    | NA                               | NA          | NA |
| chr12 | 1021912  | 1021912  | C       | -     | UTR3         | RAD52     | NA                   | NA                                                              | NA                               | rs71441627  | NA |
| chr12 | 4873163  | 4873163  | G       | T     | exonic       | GALNT8    | nonsynonymous SNV    | GALNT8:NM_017417:exon9:c.G1543T:p.V515F                         | =COSM1179986;OCCURENCE=1(prostat | rs1468556   | P  |
| chr12 | 5021439  | 5021439  | G       | T     | exonic       | KCNA1     | nonsynonymous SNV    | KCNA1:NM_000217:exon2:c.G895T:p.V299F                           | NA                               | NA          | D  |
| chr12 | 6499908  | 6499908  | A       | G     | exonic       | LTBR      | synonymous SNV       | 1270987:exon10:c.A1056G:p.G352G,LTBR:NM_002342:exon10:c.A111    | NA                               | NA          | NA |
| chr12 | 6679324  | 6679324  | T       | -     | UTR3         | CHD4      | NA                   | NA                                                              | NA                               | NA          | NA |
| chr12 | 6775801  | 6775801  | A       | -     | UTR3         | ZNF384    | NA                   | NA                                                              | NA                               | NA          | NA |
| chr12 | 6858126  | 6858126  | G       | A     | exonic       | MLF2      | synonymous SNV       | MLF2:NM_005439:exon8:c.C582T:p.D194D                            | =COSM431733;OCCURENCE=1(pancrea  | rs2302371   | NA |
| chr12 | 7947875  | 7947877  | TTT     | -     | UTR3         | NANOG     | NA                   | NA                                                              | NA                               | rs4012936   | NA |
| chr12 | 8353374  | 8353374  | G       | A     | ncRNA_exonic | FAM66C    | NA                   | NA                                                              | NA                               | rs200171719 | NA |
| chr12 | 8353403  | 8353403  | A       | G     | ncRNA_exonic | FAM66C    | NA                   | NA                                                              | NA                               | rs200301637 | NA |
| chr12 | 8927168  | 8927168  | C       | T     | UTR3         | RIMKLB    | NA                   | NA                                                              | NA                               | NA          | NA |
| chr12 | 9447488  | 9447488  | C       | T     | ncRNA_exonic | LOC642846 | NA                   | NA                                                              | NA                               | rs61916250  | NA |
| chr12 | 9571764  | 9571764  | T       | G     | ncRNA_exonic | DDX12P    | NA                   | NA                                                              | D=COSM469094;OCCURENCE=1(kidney  | rs117821635 | NA |
| chr12 | 9585598  | 9585598  | T       | C     | ncRNA_exonic | DDX12P    | NA                   | NA                                                              | NA                               | rs200479049 | NA |
| chr12 | 9800675  | 9800675  | -       | CC    | ncRNA_exonic | LOC374443 | NA                   | NA                                                              | NA                               | NA          | NA |
| chr12 | 9800777  | 9800777  | T       | G     | ncRNA_exonic | LOC374443 | NA                   | NA                                                              | NA                               | NA          | NA |
| chr12 | 9849145  | 9849145  | A       | -     | UTR3         | CLEC2D    | NA                   | NA                                                              | NA                               | rs112075912 | NA |
| chr12 | 9885707  | 9885707  | -       | TAAGT | exonic       | CLECL1    | frameshift insertion | 3.S52fs,CLECL1:NM_001267701:exon1:c.154_155insACTTA:p.S52fs,CLF | NA                               | rs112979434 | NA |
| chr12 | 10583696 | 10583696 | C       | T     | UTR3         | KLRC2     | NA                   | NA                                                              | NA                               | rs2981593   | NA |
| chr12 | 11083356 | 11083356 | A       | G     | exonic       | PRH2      | nonsynonymous SNV    | 1_001110213:exon3:c.A196G:p.N66D,PRH2:NM_005042:exon3:c.A196    | NA                               | rs1049112   | NA |
| chr12 | 11420721 | 11420721 | A       | G     | exonic       | PRB3      | synonymous SNV       | PRB3:NM_006249:exon3:c.T462C:p.G154G                            | NA                               | NA          | NA |
| chr12 | 11420895 | 11420895 | C       | T     | exonic       | PRB3      | synonymous SNV       | PRB3:NM_006249:exon3:c.G288A:p.P96P                             | NA                               | NA          | NA |

|       |          |          |          |       |              |                     |                   |                                                               |                                 |             |    |
|-------|----------|----------|----------|-------|--------------|---------------------|-------------------|---------------------------------------------------------------|---------------------------------|-------------|----|
| chr12 | 11421004 | 11421004 | C        | G     | exonic       | PRB3                | nonsynonymous SNV | PRB3:NM_006249:exon3:c.G179C:p.R60P                           | NA                              | rs71455364  | NA |
| chr12 | 11461440 | 11461440 | T        | C     | exonic       | PRB4                | synonymous SNV    | PRB4:NM_002723:exon3:c.A477G:p.P159P                          | NA                              | NA          | NA |
| chr12 | 11461444 | 11461444 | T        | G     | exonic       | PRB4                | nonsynonymous SNV | PRB4:NM_002723:exon3:c.A473C:p.H158P                          | NA                              | rs59774427  | NA |
| chr12 | 11461722 | 11461722 | T        | G     | exonic       | PRB4                | synonymous SNV    | 1_001261399:exon3:c.A195C:p.G65G,PRB4:NM_002723:exon3:c.A195G | NA                              | rs78020621  | NA |
| chr12 | 11461738 | 11461738 | G        | C     | exonic       | PRB4                | nonsynonymous SNV | 4_001261399:exon3:c.C179G:p.P60R,PRB4:NM_002723:exon3:c.C179G | NA                              | rs79562958  | NA |
| chr12 | 11546192 | 11546192 | G        | A     | exonic       | PRB2                | nonsynonymous SNV | PRB2:NM_006248:exon3:c.C820T:p.P274S                          | NA                              | rs10845349  | NA |
| chr12 | 11546258 | 11546258 | G        | T     | exonic       | PRB2                | nonsynonymous SNV | PRB2:NM_006248:exon3:c.C754A:p.Q252K                          | NA                              | NA          | NA |
| chr12 | 12045145 | 12045146 | TT       | -     | ncRNA_UTR3   | ETV6                | NA                | NA                                                            | NA                              | NA          | NA |
| chr12 | 19529083 | 19529083 | A        | -     | UTR3         | PLEKHA5             | NA                | NA                                                            | NA                              | NA          | NA |
| chr12 | 22839786 | 22839793 | TTTTTTTT | -     | UTR3         | ETNK1               | NA                | NA                                                            | NA                              | rs57569708  | NA |
| chr12 | 24967769 | 24967769 | C        | T     | UTR3         | BCAT1               | NA                | NA                                                            | NA                              | NA          | NA |
| chr12 | 26386265 | 26386268 | ATAT     | -     | UTR3         | SSPN                | NA                | NA                                                            | NA                              | NA          | NA |
| chr12 | 27848053 | 27848053 | -        | T     | UTR3         | PPFIBP1             | NA                | NA                                                            | NA                              | NA          | NA |
| chr12 | 29604392 | 29604392 | C        | G     | exonic       | OVCH1               | nonsynonymous SNV | OVCH1:NM_183378:exon22:c.G2641C:p.A881P                       | NA                              | rs1347570   | NA |
| chr12 | 31648826 | 31648826 | C        | T     | exonic       | DENND5B             | nonsynonymous SNV | DENND5B:NM_144973:exon2:c.G155A:p.R52K                        | NA                              | rs4930979   | NA |
| chr12 | 38719971 | 38719971 | -        | ATTTT | UTR3         | ALG10B              | NA                | NA                                                            | NA                              | rs141976317 | NA |
| chr12 | 39047480 | 39047480 | C        | A     | UTR3         | CPNE8               | NA                | NA                                                            | NA                              | NA          | NA |
| chr12 | 39687535 | 39687535 | -        | A     | UTR3         | KIF21A              | NA                | NA                                                            | NA                              | rs34373131  | NA |
| chr12 | 40742254 | 40742254 | G        | A     | exonic       | LRRK2               | synonymous SNV    | LRRK2:NM_198578:exon43:c.G6324A:p.E2108E                      | NA                              | rs10878405  | NA |
| chr12 | 43860526 | 43860526 | A        | G     | exonic       | ADAMTS20            | synonymous SNV    | ADAMTS20:NM_025003:exon9:c.T1296C:p.P432P                     | NA                              | rs11182088  | NA |
| chr12 | 49315300 | 49315300 | -        | T     | UTR3         | CCDC65              | NA                | NA                                                            | NA                              | NA          | NA |
| chr12 | 50745739 | 50745739 | A        | G     | exonic       | FAM186A             | nonsynonymous SNV | FAM186A:NM_001145475:exon4:c.T4876C:p.S1626P                  | NA                              | NA          | NA |
| chr12 | 50746158 | 50746158 | G        | T     | exonic       | FAM186A             | nonsynonymous SNV | FAM186A:NM_001145475:exon4:c.C4457A:p.P1486Q                  | ID=COSM229789;OCCURENCE=1(skin) | NA          | NA |
| chr12 | 50746280 | 50746280 | C        | G     | exonic       | FAM186A             | nonsynonymous SNV | FAM186A:NM_001145475:exon4:c.G4335C:p.M1445I                  | NA                              | NA          | NA |
| chr12 | 50746320 | 50746320 | T        | C     | exonic       | FAM186A             | nonsynonymous SNV | FAM186A:NM_001145475:exon4:c.A4295G:p.E1432G                  | NA                              | NA          | NA |
| chr12 | 50746496 | 50746496 | C        | G     | exonic       | FAM186A             | nonsynonymous SNV | FAM186A:NM_001145475:exon4:c.G4119C:p.M1373I                  | NA                              | NA          | NA |
| chr12 | 50746603 | 50746603 | T        | G     | exonic       | FAM186A             | nonsynonymous SNV | FAM186A:NM_001145475:exon4:c.A4012C:p.T1338P                  | NA                              | NA          | NA |
| chr12 | 50746608 | 50746608 | T        | C     | exonic       | FAM186A             | nonsynonymous SNV | FAM186A:NM_001145475:exon4:c.A4007G:p.E1336G                  | NA                              | NA          | NA |
| chr12 | 50746771 | 50746771 | T        | G     | exonic       | FAM186A             | nonsynonymous SNV | FAM186A:NM_001145475:exon4:c.A3844C:p.K1282Q                  | NA                              | NA          | NA |
| chr12 | 50746927 | 50746927 | T        | G     | exonic       | FAM186A             | nonsynonymous SNV | FAM186A:NM_001145475:exon4:c.A3688C:p.T1230P                  | NA                              | NA          | NA |
| chr12 | 51891648 | 51891648 | C        | A     | intronic     | SLC4A8              | NA                | NA                                                            | NA                              | NA          | NA |
| chr12 | 52374856 | 52374856 | T        | G     | exonic       | ACVR1B              | synonymous SNV    | IG:p.G228G,ACVR1B:NM_020327:exon4:c.T528G:p.G176G,ACVR1B:NM   | NA                              | NA          | NA |
| chr12 | 52627215 | 52627215 | A        | G     | exonic       | KRT7                | synonymous SNV    | KRT7:NM_005556:exon1:c.A135G:p.S45S                           | NA                              | rs7308888   | NA |
| chr12 | 52845601 | 52845601 | C        | T     | exonic       | KRT6B               | nonsynonymous SNV | KRT6B:NM_005555:exon1:c.G262A:p.G88R                          | NA                              | rs201122967 | NA |
| chr12 | 52845665 | 52845665 | G        | T     | exonic       | KRT6B               | synonymous SNV    | KRT6B:NM_005555:exon1:c.C198A:p.G66G                          | NA                              | rs141114189 | NA |
| chr12 | 53162729 | 53162729 | A        | C     | exonic       | KRT76               | nonsynonymous SNV | KRT76:NM_015848:exon9:c.T1685G:p.V562G                        | NA                              | NA          | NA |
| chr12 | 53162773 | 53162773 | A        | G     | exonic       | KRT76               | synonymous SNV    | KRT76:NM_015848:exon9:c.T1641C:p.S547S                        | NA                              | rs1464423   | NA |
| chr12 | 53810134 | 53810135 | TT       | -     | UTR3         | SP1                 | NA                | NA                                                            | NA                              | NA          | NA |
| chr12 | 54427251 | 54427251 | T        | G     | exonic       | HOXC5               | nonsynonymous SNV | HOXC5:NM_018953:exon1:c.T345G:p.S115R                         | NA                              | NA          | P  |
| chr12 | 54514236 | 54514236 | G        | C     | ncRNA_exonic | FLJ12825            | NA                | NA                                                            | NA                              | rs199990556 | NA |
| chr12 | 54514262 | 54514262 | C        | T     | ncRNA_exonic | FLJ12825            | NA                | NA                                                            | NA                              | rs200768860 | NA |
| chr12 | 54514291 | 54514291 | G        | C     | ncRNA_exonic | FLJ12825            | NA                | NA                                                            | NA                              | rs75934050  | NA |
| chr12 | 54943322 | 54943322 | A        | G     | UTR5         | PDE1B               | NA                | NA                                                            | NA                              | NA          | NA |
| chr12 | 54943340 | 54943340 | A        | G     | UTR5         | PDE1B               | NA                | NA                                                            | NA                              | NA          | NA |
| chr12 | 54943354 | 54943354 | A        | G     | UTR5         | PDE1B               | NA                | NA                                                            | NA                              | NA          | NA |
| chr12 | 56430860 | 56430860 | -        | G     | UTR3         | IKZF4               | NA                | NA                                                            | NA                              | NA          | NA |
| chr12 | 56810470 | 56810470 | G        | T     | UTR3         | TIMELESS            | NA                | NA                                                            | NA                              | NA          | NA |
| chr12 | 57487230 | 57487230 | C        | A     | exonic       | NAB2                | nonsynonymous SNV | NAB2:NM_005967:exon6:c.C1317A:p.D439E                         | NA                              | NA          | NA |
| chr12 | 57648285 | 57648285 | A        | -     | UTR3         | R3HDM2              | NA                | NA                                                            | NA                              | rs67514723  | NA |
| chr12 | 58146158 | 58146158 | G        | T     | UTR5         | CDK4                | NA                | NA                                                            | NA                              | NA          | NA |
| chr12 | 58146161 | 58146161 | G        | T     | UTR5         | CDK4                | NA                | NA                                                            | NA                              | NA          | NA |
| chr12 | 62988922 | 62988922 | T        | -     | UTR3         | MON2                | NA                | NA                                                            | NA                              | NA          | NA |
| chr12 | 62997466 | 62997466 | C        | A     | ncRNA_exonic | MIRLET7I            | NA                | NA                                                            | NA                              | NA          | NA |
| chr12 | 64541157 | 64541157 | A        | C     | UTR3         | SRGAP1              | NA                | NA                                                            | NA                              | NA          | NA |
| chr12 | 64541171 | 64541171 | A        | C     | UTR3         | SRGAP1              | NA                | NA                                                            | NA                              | NA          | NA |
| chr12 | 64541205 | 64541205 | A        | C     | UTR3         | SRGAP1              | NA                | NA                                                            | NA                              | NA          | NA |
| chr12 | 66218517 | 66218517 | C        | G     | ncRNA_UTR5   | HMGA2               | NA                | NA                                                            | NA                              | rs7965172   | NA |
| chr12 | 66218519 | 66218519 | C        | G     | ncRNA_UTR5   | HMGA2               | NA                | NA                                                            | NA                              | rs12425965  | NA |
| chr12 | 70214497 | 70214497 | G        | T     | UTR3         | RAB3IP              | NA                | NA                                                            | NA                              | rs11177881  | NA |
| chr12 | 71519096 | 71519096 | G        | C     | UTR3         | TSPAN8              | NA                | NA                                                            | NA                              | rs1051344   | NA |
| chr12 | 72079926 | 72079926 | T        | G     | UTR5         | TMEM19              | NA                | NA                                                            | NA                              | NA          | NA |
| chr12 | 88591037 | 88591038 | TT       | -     | UTR3         | TMTC3               | NA                | NA                                                            | NA                              | NA          | NA |
| chr12 | 89914880 | 89914880 | A        | -     | UTR3         | GALNT4,POC1B-GALNT4 | NA                | NA                                                            | NA                              | NA          | NA |
| chr12 | 89914886 | 89914886 | A        | T     | UTR3         | GALNT4,POC1B-GALNT4 | NA                | NA                                                            | NA                              | rs10745507  | NA |
| chr12 | 95473723 | 95473723 | T        | -     | UTR3         | FGD6                | NA                | NA                                                            | NA                              | NA          | NA |
| chr12 | 96361580 | 96361580 | G        | T     | exonic       | AMDHD1              | stopgain SNV      | AMDHD1:NM_152435:exon9:c.G1240T:p.E414X                       | NA                              | NA          | NA |

|       |          |          |          |     |              |                       |                   |                                                                |                                   |             |    |
|-------|----------|----------|----------|-----|--------------|-----------------------|-------------------|----------------------------------------------------------------|-----------------------------------|-------------|----|
| chr12 | 96367601 | 96367601 | -        | AAA | UTR3         | HAL                   | NA                | NA                                                             | NA                                | NA          | NA |
| chr12 | 1.01E+08 | 1.01E+08 | -        | T   | UTR3         | SLC17A8               | NA                | NA                                                             | NA                                | NA          | NA |
| chr12 | 1.02E+08 | 1.02E+08 | -        | A   | UTR3         | MYBPC1                | NA                | NA                                                             | NA                                | NA          | NA |
| chr12 | 1.04E+08 | 1.04E+08 | T        | G   | exonic       | C12orf42              | nonsynonymous SNV | _001099336:exon6:c.A787C:p.S263R,C12orf42:NM_198521:exon6:c.A  |                                   | rs79387839  | NA |
| chr12 | 1.04E+08 | 1.04E+08 | C        | T   | exonic       | STAB2                 | synonymous SNV    | STAB2:NM_017564:exon51:c.C5307T:p.l1769I                       |                                   | rs117118859 | NA |
| chr12 | 1.04E+08 | 1.04E+08 | -        | A   | UTR3         | NT5DC3                | NA                | NA                                                             | NA                                | rs11428514  | NA |
| chr12 | 1.04E+08 | 1.04E+08 | C        | A   | exonic       | TDG                   | synonymous SNV    | TDG:NM_003211:exon3:c.C387A:p.T129T                            | 22020;OCCURENCE=1(upper_aerodiges | rs75200561  | NA |
| chr12 | 1.07E+08 | 1.07E+08 | T        | -   | UTR3         | CKAP4                 | NA                | NA                                                             | NA                                | rs71442016  | NA |
| chr12 | 1.07E+08 | 1.07E+08 | T        | -   | UTR3         | C12orf23              | NA                | NA                                                             | NA                                | rs57234871  | NA |
| chr12 | 1.08E+08 | 1.08E+08 | A        | C   | exonic       | BTBD11                | nonsynonymous SNV | J1017523:exon5:c.A545C:p.H182P,BTBD11:NM_001018072:exon7:c.A   |                                   | rs76689600  | D  |
| chr12 | 1.09E+08 | 1.09E+08 | C        | G   | exonic       | TMEM119               | synonymous SNV    | TMEM119:NM_181724:exon2:c.G180C:p.P60P                         |                                   | NA          | NA |
| chr12 | 1.09E+08 | 1.09E+08 | A        | G   | exonic       | TMEM119               | nonsynonymous SNV | TMEM119:NM_181724:exon2:c.T172C:p.W58R                         |                                   | NA          | B  |
| chr12 | 1.09E+08 | 1.09E+08 | T        | G   | exonic       | TMEM119               | synonymous SNV    | TMEM119:NM_181724:exon2:c.A168C:p.P56P                         |                                   | NA          | NA |
| chr12 | 1.09E+08 | 1.09E+08 | C        | G   | exonic       | TMEM119               | synonymous SNV    | TMEM119:NM_181724:exon2:c.G165C:p.P55P                         |                                   | NA          | NA |
| chr12 | 1.09E+08 | 1.09E+08 | C        | G   | exonic       | TMEM119               | synonymous SNV    | TMEM119:NM_181724:exon2:c.G156C:p.P52P                         |                                   | NA          | NA |
| chr12 | 1.1E+08  | 1.1E+08  | CA       | -   | UTR3         | MMAB                  | NA                | NA                                                             | NA                                | NA          | NA |
| chr12 | 1.1E+08  | 1.1E+08  | A        | -   | UTR3         | GLTP                  | NA                | NA                                                             | NA                                | rs112967311 | NA |
| chr12 | 1.12E+08 | 1.12E+08 | A        | T   | UTR3         | NAA25                 | NA                | NA                                                             | NA                                | rs58973750  | NA |
| chr12 | 1.13E+08 | 1.13E+08 | TGA      | -   | UTR3         | PTPN11                | NA                | NA                                                             | NA                                | rs148422684 | NA |
| chr12 | 1.13E+08 | 1.13E+08 | AC       | -   | UTR3         | RPH3A                 | NA                | NA                                                             | NA                                | rs10563429  | NA |
| chr12 | 1.14E+08 | 1.14E+08 | T        | G   | exonic       | TPCN1                 | nonsynonymous SNV | 17901:exon18:c.T1463G:p.V488G,TPCN1:NM_001143819:exon19:c.T11  |                                   | NA          | P  |
| chr12 | 1.18E+08 | 1.18E+08 | TGCTCTGC | -   | UTR3         | KSR2                  | NA                | NA                                                             | NA                                | NA          | NA |
| chr12 | 1.2E+08  | 1.2E+08  | G        | A   | UTR3         | CIT                   | NA                | NA                                                             | NA                                | rs139790082 | NA |
| chr12 | 1.21E+08 | 1.21E+08 | G        | A   | UTR3         | MSI1                  | NA                | NA                                                             | NA                                | NA          | NA |
| chr12 | 1.21E+08 | 1.21E+08 | C        | T   | UTR3         | MSI1                  | NA                | NA                                                             | NA                                | NA          | NA |
| chr12 | 1.22E+08 | 1.22E+08 | C        | A   | UTR3         | P2RX7                 | NA                | NA                                                             | NA                                | rs79099474  | NA |
| chr12 | 1.22E+08 | 1.22E+08 | A        | C   | exonic       | CAMKK2                | nonsynonymous SNV | CAMKK2:NM_001270486:exon16:c.T1667G:p.V556G                    |                                   | NA          | NA |
| chr12 | 1.23E+08 | 1.23E+08 | -        | AT  | UTR3         | DENR                  | NA                | NA                                                             | NA                                | rs34625739  | NA |
| chr12 | 1.24E+08 | 1.24E+08 | C        | A   | UTR3         | SETD8                 | NA                | NA                                                             | NA                                | rs80048501  | NA |
| chr12 | 1.24E+08 | 1.24E+08 | A        | T   | UTR3         | SETD8                 | NA                | NA                                                             | NA                                | NA          | NA |
| chr12 | 1.24E+08 | 1.24E+08 | C        | T   | UTR3         | SETD8                 | NA                | NA                                                             | NA                                | rs111418154 | NA |
| chr12 | 1.25E+08 | 1.25E+08 | T        | C   | exonic       | UBC                   | synonymous SNV    | UBC:NM_021009:exon2:c.A1644G:p.E548E                           |                                   | rs1071722   | NA |
| chr12 | 1.29E+08 | 1.29E+08 | G        | T   | UTR3         | TMEM132C              | NA                | NA                                                             | NA                                | NA          | NA |
| chr12 | 1.29E+08 | 1.29E+08 | G        | A   | intronic     | SLC15A4               | NA                | NA                                                             | NA                                | rs200176633 | NA |
| chr12 | 1.31E+08 | 1.31E+08 | -        | AAA | ncRNA_exonic | LOC100190940          | NA                | NA                                                             | NA                                | rs34472041  | NA |
| chr12 | 1.33E+08 | 1.33E+08 | G        | A   | exonic       | FBRSL1                | nonsynonymous SNV | FBRSL1:NM_001142641:exon3:c.G521A:p.R174Q                      |                                   | rs186991682 | NA |
| chr12 | 1.33E+08 | 1.33E+08 | T        | C   | UTR3         | P2RX2                 | NA                | NA                                                             | NA                                | rs7973007   | NA |
| chr12 | 1.33E+08 | 1.33E+08 | C        | A   | exonic       | ANKLE2                | nonsynonymous SNV | ANKLE2:NM_015114:exon13:c.G2619T:p.W873C                       |                                   | NA          | D  |
| chr12 | 1.34E+08 | 1.34E+08 | A        | C   | UTR3         | ZNF268                | NA                | NA                                                             | NA                                | NA          | NA |
| chr12 | 1.34E+08 | 1.34E+08 | A        | C   | UTR3         | ZNF268                | NA                | NA                                                             | NA                                | NA          | NA |
| chr13 | 19419783 | 19419783 | C        | G   | ncRNA_exonic | ANKRD20A9P            | NA                | NA                                                             | NA                                | rs74692341  | NA |
| chr13 | 19419808 | 19419808 | G        | A   | ncRNA_exonic | ANKRD20A9P            | NA                | NA                                                             | NA                                | rs73435804  | NA |
| chr13 | 19419847 | 19419847 | C        | A   | ncRNA_exonic | ANKRD20A9P            | NA                | NA                                                             | NA                                | rs74349552  | NA |
| chr13 | 19436148 | 19436148 | C        | G   | ncRNA_exonic | ANKRD20A9P            | NA                | NA                                                             | NA                                | rs112815656 | NA |
| chr13 | 19436179 | 19436179 | A        | G   | ncRNA_exonic | ANKRD20A9P            | NA                | NA                                                             | NA                                | rs112011321 | NA |
| chr13 | 22275849 | 22275850 | TG       | -   | UTR3         | FGF9                  | NA                | NA                                                             | NA                                | NA          | NA |
| chr13 | 25272870 | 25272870 | C        | T   | exonic       | ATP12A                | synonymous SNV    | _001185085:exon12:c.C1605T:p.I535I,ATP12A:NM_001676:exon12:c.C |                                   | rs2289901   | NA |
| chr13 | 25875755 | 25875755 | A        | C   | UTR5         | NUPL1                 | NA                | NA                                                             | NA                                | NA          | NA |
| chr13 | 27847812 | 27847812 | G        | T   | UTR3         | RASL11A               | NA                | NA                                                             | NA                                | NA          | NA |
| chr13 | 28874659 | 28874664 | CACACA   | -   | UTR3         | FLT1                  | NA                | NA                                                             | NA                                | rs147176157 | NA |
| chr13 | 28875310 | 28875310 | A        | -   | UTR3         | FLT1                  | NA                | NA                                                             | NA                                | rs201743756 | NA |
| chr13 | 31035091 | 31035092 | TT       | -   | UTR3         | HMGB1                 | NA                | NA                                                             | NA                                | NA          | NA |
| chr13 | 31904677 | 31904677 | -        | T   | UTR3         | B3GALT1               | NA                | NA                                                             | NA                                | NA          | NA |
| chr13 | 33349235 | 33349235 | -        | TT  | UTR3         | PDS5B                 | NA                | NA                                                             | NA                                | NA          | NA |
| chr13 | 33351489 | 33351489 | C        | T   | UTR3         | PDS5B                 | NA                | NA                                                             | NA                                | rs202241635 | NA |
| chr13 | 33351489 | 33351489 | -        | TTT | UTR3         | PDS5B                 | NA                | NA                                                             | NA                                | NA          | NA |
| chr13 | 36744910 | 36744910 | C        | T   | exonic       | CCDC169-SOHLH2,SOHLH2 | nonsynonymous SNV | 5:exon10:c.G1015A:p.A339T,CCDC169-SOHLH2:NM_001198910:exon1    |                                   | rs2296968   | B  |
| chr13 | 36876379 | 36876379 | A        | G   | UTR3         | SPG20                 | NA                | NA                                                             | NA                                | rs78129833  | NA |
| chr13 | 41837625 | 41837625 | G        | A   | UTR5         | MTRF1                 | NA                | NA                                                             | NA                                | NA          | NA |
| chr13 | 43681661 | 43681662 | AC       | -   | UTR3         | DNAJC15               | NA                | NA                                                             | NA                                | NA          | NA |
| chr13 | 49852512 | 49852512 | G        | T   | exonic       | CDADC1                | nonsynonymous SNV | 001193478:exon7:c.G1077T:p.M359I,CDADC1:NM_030911:exon7:c.G1   |                                   | NA          | D  |
| chr13 | 58209060 | 58209060 | T        | C   | exonic       | PCDH17                | nonsynonymous SNV | PCDH17:NM_001040429:exon1:c.T2380C:p.S794P                     |                                   | NA          | D  |
| chr13 | 66878392 | 66878392 | C        | A   | UTR3         | PCDH9                 | NA                | NA                                                             | NA                                | rs200806980 | NA |
| chr13 | 75861158 | 75861158 | C        | A   | exonic       | TBC1D4                | nonsynonymous SNV | TBC1D4:NM_014832:exon21:c.G3667T:p.A1223S                      |                                   | NA          | B  |
| chr13 | 96485306 | 96485306 | C        | A   | exonic       | UGGT2                 | nonsynonymous SNV | UGGT2:NM_020121:exon38:c.G4403T:p.C1468F                       |                                   | NA          | D  |
| chr13 | 1.01E+08 | 1.01E+08 | -        | T   | UTR3         | ZIC2                  | NA                | NA                                                             | NA                                | rs34544768  | NA |

|       |          |          |      |    |              |                           |                   |                                                                                                 |            |             |    |
|-------|----------|----------|------|----|--------------|---------------------------|-------------------|-------------------------------------------------------------------------------------------------|------------|-------------|----|
| chr13 | 1.01E+08 | 1.01E+08 | G    | C  | UTR5         | TMTC4                     | NA                | NA                                                                                              | NA         | rs1283201   | NA |
| chr13 | 1.04E+08 | 1.04E+08 | -    | T  | ncRNA_exonic | METTL21EP                 | NA                | NA                                                                                              | NA         | rs34557658  | NA |
| chr13 | 1.12E+08 | 1.12E+08 | A    | -  | UTR3         | ARHGEF7                   | NA                | NA                                                                                              | NA         | rs11319592  | NA |
| chr13 | 1.14E+08 | 1.14E+08 | C    | A  | exonic       | F10                       | nonsynonymous SNV | F10:NM_000504:exon1:c.C7A:p.R35                                                                 | NA         | NA          | P  |
| chr13 | 1.15E+08 | 1.15E+08 | G    | C  | exonic       | UPF3A                     | nonsynonymous SNV | NM_023011:exon2:c.G208C:p.V70L,UPF3A:NM_080687:exon2:c.G208OCCURENCE=2(skin),1(lung),1(upper_ae | rs76186578 | NA          | D  |
| chr14 | 21965677 | 21965677 | G    | T  | UTR3         | TOX4                      | NA                | NA                                                                                              | NA         | rs3929984   | NA |
| chr14 | 22102293 | 22102293 | C    | T  | exonic       | OR10G2                    | nonsynonymous SNV | OR10G2:NM_001005466:exon1:c.G706A:p.A236T                                                       | NA         | rs41307110  | B  |
| chr14 | 23235808 | 23235808 | G    | A  | exonic       | OXA1L                     | synonymous SNV    | OXA1L:NM_005015:exon1:c.G78A:p.L26L                                                             | NA         | rs1957374   | NA |
| chr14 | 23518270 | 23518270 | C    | A  | exonic       | CDH24                     | synonymous SNV    | _144985:exon11:c.G1812T:p.L604L,CDH24:NM_022478:exon12:c.G19:                                   | NA         | NA          | NA |
| chr14 | 23568766 | 23568766 | -    | T  | UTR3         | C14orf119                 | NA                | NA                                                                                              | NA         | NA          | NA |
| chr14 | 23795205 | 23795206 | TT   | -  | UTR3         | BCL2L2-PABPN1,PABPN1      | NA                | NA                                                                                              | NA         | rs58264930  | NA |
| chr14 | 29262813 | 29262813 | T    | C  | ncRNA_exonic | C14orf23                  | NA                | NA                                                                                              | NA         | rs71414080  | NA |
| chr14 | 34272917 | 34272920 | AAAA | -  | UTR3         | NPAS3                     | NA                | NA                                                                                              | NA         | NA          | NA |
| chr14 | 34394147 | 34394147 | -    | AA | UTR3         | EGLN3                     | NA                | NA                                                                                              | NA         | NA          | NA |
| chr14 | 36986022 | 36986022 | -    | A  | UTR3         | NKX2-1                    | NA                | NA                                                                                              | NA         | rs112799458 | NA |
| chr14 | 45397887 | 45397887 | T    | -  | UTR3         | KLHL28                    | NA                | NA                                                                                              | NA         | NA          | NA |
| chr14 | 45584495 | 45584495 | T    | -  | UTR3         | PRPF39                    | NA                | NA                                                                                              | NA         | NA          | NA |
| chr14 | 47310821 | 47310821 | C    | T  | UTR3         | MDGA2                     | NA                | NA                                                                                              | NA         | rs200571407 | NA |
| chr14 | 47310822 | 47310822 | T    | C  | UTR3         | MDGA2                     | NA                | NA                                                                                              | NA         | NA          | NA |
| chr14 | 47310830 | 47310830 | A    | T  | UTR3         | MDGA2                     | NA                | NA                                                                                              | NA         | NA          | NA |
| chr14 | 47310830 | 47310830 | -    | T  | UTR3         | MDGA2                     | NA                | NA                                                                                              | NA         | rs71448138  | NA |
| chr14 | 50778816 | 50778816 | A    | C  | exonic       | L2HGDH                    | nonsynonymous SNV | L2HGDH:NM_024884:exon1:c.T53G:p.L18R                                                            | NA         | rs2275591   | NA |
| chr14 | 53619544 | 53619544 | G    | A  | exonic       | DDHD1                     | synonymous SNV    | 2273T:p.F91F,DDHD1:NM_001160148:exon1:c.C273T:p.F91F,DDHD1:M                                    | NA         | rs2358189   | NA |
| chr14 | 55494090 | 55494090 | G    | A  | UTR5         | SOCS4                     | NA                | NA                                                                                              | NA         | rs77678033  | NA |
| chr14 | 55494091 | 55494091 | G    | A  | UTR5         | SOCS4                     | NA                | NA                                                                                              | NA         | rs77911976  | NA |
| chr14 | 57114800 | 57114800 | A    | -  | UTR3         | TMEM260                   | NA                | NA                                                                                              | NA         | NA          | NA |
| chr14 | 57280005 | 57280005 | T    | -  | ncRNA_exonic | OTX2-AS1                  | NA                | NA                                                                                              | NA         | NA          | NA |
| chr14 | 59835968 | 59835968 | C    | A  | UTR3         | DAAM1                     | NA                | NA                                                                                              | NA         | rs74057123  | NA |
| chr14 | 59954397 | 59954397 | C    | A  | exonic       | JKAMP                     | stopgain SNV      | V_001098625:exon3:c.C84A:p.C28X,JKAMP:NM_016475:exon3:c.C102                                    | NA         | NA          | NA |
| chr14 | 60759368 | 60759368 | T    | -  | UTR3         | PPM1A                     | NA                | NA                                                                                              | NA         | NA          | NA |
| chr14 | 65054966 | 65054966 | C    | T  | exonic       | PPP1R36                   | synonymous SNV    | PPP1R36:NM_172365:exon11:c.C1035T:p.A345A                                                       | NA         | rs116953714 | NA |
| chr14 | 67852376 | 67852376 | T    | -  | UTR3         | EIF2S1                    | NA                | NA                                                                                              | NA         | rs71727390  | NA |
| chr14 | 68035879 | 68035879 | A    | G  | exonic       | PLEKHH1                   | nonsynonymous SNV | PLEKHH1:NM_020715:exon8:c.A1288G:p.T430A                                                        | NA         | rs3825725   | NA |
| chr14 | 68066949 | 68066949 | G    | A  | UTR5         | PIGH                      | NA                | NA                                                                                              | NA         | rs11547225  | NA |
| chr14 | 73032200 | 73032200 | -    | TC | UTR3         | RGS6                      | NA                | NA                                                                                              | NA         | rs140460180 | NA |
| chr14 | 73137344 | 73137345 | TC   | -  | UTR3         | DPF3                      | NA                | NA                                                                                              | NA         | NA          | NA |
| chr14 | 74168648 | 74168648 | A    | -  | UTR3         | DNAL1                     | NA                | NA                                                                                              | NA         | NA          | NA |
| chr14 | 74205707 | 74205707 | T    | G  | exonic       | ELMSAN1                   | synonymous SNV    | _001043318:exon2:c.A1005C:p.L335L,ELMSAN1:NM_194278:exon2:c.A                                   | NA         | NA          | NA |
| chr14 | 76668880 | 76668881 | AC   | -  | UTR3         | GPATCH2L                  | NA                | NA                                                                                              | NA         | NA          | NA |
| chr14 | 78045446 | 78045446 | C    | A  | exonic       | SPTLC2                    | nonsynonymous SNV | SPTLC2:NM_004863:exon3:c.G334T:p.V112L                                                          | NA         | NA          | B  |
| chr14 | 89627942 | 89627942 | C    | T  | UTR3         | FOXN3                     | NA                | NA                                                                                              | NA         | rs7156172   | NA |
| chr14 | 89627946 | 89627946 | C    | T  | UTR3         | FOXN3                     | NA                | NA                                                                                              | NA         | NA          | NA |
| chr14 | 91084338 | 91084338 | C    | T  | exonic       | TTC7B                     | synonymous SNV    | TTC7B:NM_001010854:exon16:c.G1803A:p.E601E                                                      | NA         | rs754247    | NA |
| chr14 | 92527592 | 92527592 | A    | -  | UTR3         | ATXN3                     | NA                | NA                                                                                              | NA         | rs201936460 | NA |
| chr14 | 95655320 | 95655320 | A    | -  | UTR3         | CLMN                      | NA                | NA                                                                                              | NA         | NA          | NA |
| chr14 | 99638737 | 99638737 | T    | -  | UTR3         | BCL11B                    | NA                | NA                                                                                              | NA         | rs199890567 | NA |
| chr14 | 1.03E+08 | 1.03E+08 | A    | C  | UTR3         | RCOR1                     | NA                | NA                                                                                              | NA         | NA          | NA |
| chr14 | 1.03E+08 | 1.03E+08 | A    | C  | UTR3         | RCOR1                     | NA                | NA                                                                                              | NA         | NA          | NA |
| chr14 | 1.03E+08 | 1.03E+08 | T    | C  | UTR3         | RCOR1                     | NA                | NA                                                                                              | NA         | NA          | NA |
| chr14 | 1.05E+08 | 1.05E+08 | A    | G  | exonic       | KIF26A                    | synonymous SNV    | KIF26A:NM_015656:exon12:c.A4284G:p.A1428A                                                       | NA         | rs2487303   | NA |
| chr14 | 1.05E+08 | 1.05E+08 | A    | G  | exonic       | AHNAK2                    | synonymous SNV    | AHNAK2:NM_138420:exon7:c.T9783C:p.D3261D                                                        | NA         | rs28564728  | NA |
| chr14 | 1.05E+08 | 1.05E+08 | T    | G  | exonic       | AHNAK2                    | nonsynonymous SNV | AHNAK2:NM_138420:exon7:c.A9563C:p.N3188T                                                        | NA         | rs201816632 | NA |
| chr14 | 1.05E+08 | 1.05E+08 | T    | C  | exonic       | AHNAK2                    | synonymous SNV    | AHNAK2:NM_138420:exon7:c.A9513G:p.P3171P                                                        | NA         | rs2819427   | NA |
| chr14 | 1.05E+08 | 1.05E+08 | A    | G  | exonic       | AHNAK2                    | nonsynonymous SNV | AHNAK2:NM_138420:exon7:c.T6326C:p.V2109A                                                        | NA         | rs201948776 | NA |
| chr14 | 1.05E+08 | 1.05E+08 | T    | C  | exonic       | AHNAK2                    | nonsynonymous SNV | AHNAK2:NM_138420:exon7:c.A6145G:p.T2049A                                                        | NA         | rs201406401 | NA |
| chr14 | 1.06E+08 | 1.06E+08 | C    | T  | exonic       | BTBD6                     | synonymous SNV    | BTBD6:NM_033271:exon3:c.C237T:p.N79N                                                            | NA         | rs2816605   | NA |
| chr14 | 1.06E+08 | 1.06E+08 | C    | T  | ncRNA_exonic | KIAA0125                  | NA                | NA                                                                                              | NA         | rs11850004  | NA |
| chr15 | 20739885 | 20739885 | T    | C  | exonic       | GOLGA6L6                  | nonsynonymous SNV | GOLGA6L6:NM_001145004:exon8:c.A1865G:p.Q622R                                                    | NA         | rs57050697  | NA |
| chr15 | 21934053 | 21934053 | G    | A  | ncRNA_exonic | LOC646214                 | NA                | NA                                                                                              | NA         | NA          | NA |
| chr15 | 21938081 | 21938081 | C    | T  | ncRNA_exonic | LOC646214                 | NA                | NA                                                                                              | NA         | rs113837443 | NA |
| chr15 | 21940266 | 21940266 | -    | A  | ncRNA_exonic | LOC646214                 | NA                | NA                                                                                              | NA         | NA          | NA |
| chr15 | 21940423 | 21940423 | G    | A  | ncRNA_exonic | LOC646214                 | NA                | NA                                                                                              | NA         | rs12102267  | NA |
| chr15 | 22074657 | 22074657 | C    | G  | exonic       | 100287399,LOC100996331,PC | nonsynonymous SNV | I5C:p.E249Q,LOC100996331:NM_001277304:exon4:c.G745C:p.E249Q,                                    | NA         | rs200899135 | NA |
| chr15 | 22138292 | 22138292 | C    | T  | ncRNA_exonic | NF1P2                     | NA                | NA                                                                                              | NA         | rs138146330 | NA |
| chr15 | 22711791 | 22711791 | A    | G  | ncRNA_exonic | GOLGA8DP                  | NA                | NA                                                                                              | NA         | NA          | NA |
| chr15 | 22742718 | 22742718 | T    | A  | exonic       | GOLGA6L1                  | nonsynonymous SNV | GOLGA6L1:NM_001001413:exon8:c.T1103A:p.L368Q M230296;OCCURENCE=1(NS),2(endom                    | rs7171381  | NA          | NA |



|       |          |          |     |    |                |                            |                   |                                                                 |                                   |             |    |
|-------|----------|----------|-----|----|----------------|----------------------------|-------------------|-----------------------------------------------------------------|-----------------------------------|-------------|----|
| chr15 | 23448116 | 23448116 | G   | C  | ncRNA_exonic   | GOLGA8EP                   | NA                | NA                                                              | NA                                | rs1813574   | NA |
| chr15 | 23448157 | 23448157 | T   | C  | ncRNA_exonic   | GOLGA8EP                   | NA                | NA                                                              | NA                                | rs76705008  | NA |
| chr15 | 24412403 | 24412403 | A   | T  | ncRNA_exonic   | PWRN2                      | NA                | NA                                                              | NA                                | rs12907382  | NA |
| chr15 | 25330550 | 25330550 | T   | A  | ncRNA_exonic   | SNORD116-18                | NA                | NA                                                              | NA                                | rs3803328   | NA |
| chr15 | 28518112 | 28518112 | C   | A  | exonic         | HERC2                      | nonsynonymous SNV | HERC2:NM_004667:exon8:c.G839T:p.S280I                           | NA                                | rs200859595 | B  |
| chr15 | 28518126 | 28518126 | G   | A  | exonic         | HERC2                      | synonymous SNV    | HERC2:NM_004667:exon8:c.C825T:p.T275T                           | NA                                | NA          | NA |
| chr15 | 28518130 | 28518130 | G   | C  | exonic         | HERC2                      | nonsynonymous SNV | HERC2:NM_004667:exon8:c.C821G:p.A274G                           | NA                                | NA          | B  |
| chr15 | 28518135 | 28518135 | C   | T  | exonic         | HERC2                      | synonymous SNV    | HERC2:NM_004667:exon8:c.G816A:p.T272T                           | OSM289694;OCCURENCE=1(large_intes | rs141674943 | NA |
| chr15 | 28518136 | 28518136 | G   | A  | exonic         | HERC2                      | nonsynonymous SNV | HERC2:NM_004667:exon8:c.C815T:p.T272M                           | NA                                | rs201979656 | B  |
| chr15 | 29001133 | 29001133 | C   | T  | ncRNA_exonic   | WHAMMP2                    | NA                | NA                                                              | NA                                | rs142551791 | NA |
| chr15 | 31664441 | 31664441 | T   | C  | exonic         | KLF13                      | nonsynonymous SNV | KLF13:NM_015995:exon2:c.T806C:p.L269P                           | NA                                | NA          | NA |
| chr15 | 35812484 | 35812484 | G   | A  | UTR3           | ATPBD4                     | NA                | NA                                                              | NA                                | NA          | NA |
| chr15 | 40846105 | 40846140 | G   | -  | UTR3           | C15orf57                   | NA                | NA                                                              | NA                                | NA          | NA |
| chr15 | 40987565 | 40987565 | G   | T  | UTR5           | RAD51                      | NA                | NA                                                              | NA                                | rs1801321   | NA |
| chr15 | 41773443 | 41773443 | G   | -  | UTR3           | RTF1                       | NA                | NA                                                              | NA                                | rs56118647  | NA |
| chr15 | 41865525 | 41865525 | G   | T  | exonic         | TYRO3                      | nonsynonymous SNV | TYRO3:NM_006293:exon17:c.G2005T:p.V669L                         | NA                                | rs62001448  | D  |
| chr15 | 41871513 | 41871513 | T   | A  | UTR3           | TYRO3                      | NA                | NA                                                              | NA                                | NA          | NA |
| chr15 | 42119323 | 42119323 | -   | TC | UTR3           | MAPKBP1                    | NA                | NA                                                              | NA                                | rs34551245  | NA |
| chr15 | 42570718 | 42570718 | A   | G  | exonic         | GANC                       | nonsynonymous SNV | GANC:NM_198141:exon3:c.A131G:p.Q44R                             | NA                                | rs8024732   | B  |
| chr15 | 43650560 | 43650560 | T   | -  | UTR3           | ZSCAN29                    | NA                | NA                                                              | NA                                | NA          | NA |
| chr15 | 43652835 | 43652835 | A   | -  | UTR3           | ZSCAN29                    | NA                | NA                                                              | NA                                | rs67982601  | NA |
| chr15 | 48064867 | 48064867 | T   | A  | UTR3           | SEMA6D                     | NA                | NA                                                              | NA                                | rs3803349   | NA |
| chr15 | 50226359 | 50226359 | G   | C  | exonic         | ATP8B4                     | nonsynonymous SNV | ATP8B4:NM_024837:exon15:c.C1308G:p.F436L                        | NA                                | rs55687265  | P  |
| chr15 | 50643858 | 50643865 | G   | -  | ncRNA_exonic   | FLJ10038                   | NA                | NA                                                              | NA                                | rs146731069 | NA |
| chr15 | 50648219 | 50648219 | A   | -  | ncRNA_exonic   | GABPB1-AS1                 | NA                | NA                                                              | NA                                | NA          | NA |
| chr15 | 52413807 | 52413807 | -   | T  | UTR3           | GNB5                       | NA                | NA                                                              | NA                                | NA          | NA |
| chr15 | 55904895 | 55904895 | A   | T  | UTR3           | PRTG                       | NA                | NA                                                              | NA                                | NA          | NA |
| chr15 | 55905957 | 55905957 | -   | T  | UTR3           | PRTG                       | NA                | NA                                                              | NA                                | NA          | NA |
| chr15 | 57840202 | 57840202 | T   | -  | UTR3           | CGNL1                      | NA                | NA                                                              | NA                                | NA          | NA |
| chr15 | 60782356 | 60782356 | -   | AT | UTR3           | RORA                       | NA                | NA                                                              | NA                                | rs35741328  | NA |
| chr15 | 63362507 | 63362507 | G   | A  | UTR3           | TPM1                       | NA                | NA                                                              | NA                                | rs143569714 | NA |
| chr15 | 63362509 | 63362509 | G   | A  | UTR3           | TPM1                       | NA                | NA                                                              | NA                                | NA          | NA |
| chr15 | 64434537 | 64434537 | G   | A  | UTR3           | SNX1                       | NA                | NA                                                              | NA                                | rs17201990  | NA |
| chr15 | 65739303 | 65739303 | C   | A  | exonic         | DPP8                       | synonymous SNV    | _130434:exon20:c.G2568T:p.S856S,DPP8:NM_197961:exon20:c.G246G   | NA                                | rs11009     | NA |
| chr15 | 68594394 | 68594423 | -   | -  | UTR3           | ITGA11                     | NA                | NA                                                              | NA                                | NA          | NA |
| chr15 | 70341342 | 70341342 | A   | -  | UTR3           | TLE3                       | NA                | NA                                                              | NA                                | NA          | NA |
| chr15 | 70341854 | 70341854 | A   | -  | UTR3           | TLE3                       | NA                | NA                                                              | NA                                | rs11324999  | NA |
| chr15 | 72452675 | 72452677 | AAA | -  | UTR3           | GRAMD2                     | NA                | NA                                                              | NA                                | NA          | NA |
| chr15 | 72642905 | 72642905 | C   | T  | exonic         | HEXA                       | synonymous SNV    | HEXA:NM_000520:exon7:c.G759A:p.V253V                            | NA                                | rs117513345 | NA |
| chr15 | 72953658 | 72953658 | G   | A  | exonic         | GOLGA6B                    | synonymous SNV    | GOLGA6B:NM_018652:exon8:c.G618A:p.K206K                         | NA                                | NA          | NA |
| chr15 | 72958366 | 72958366 | T   | G  | exonic         | GOLGA6B                    | nonsynonymous SNV | GOLGA6B:NM_018652:exon17:c.T1851G:p.H617Q                       | NA                                | rs200655139 | NA |
| chr15 | 75095093 | 75095093 | A   | C  | UTR3           | CSK                        | NA                | NA                                                              | NA                                | NA          | NA |
| chr15 | 75644457 | 75644457 | G   | C  | UTR3           | GOLGA6C                    | NA                | NA                                                              | NA                                | rs2740425   | NA |
| chr15 | 76029087 | 76029087 | T   | C  | ncRNA_intronic | DNM1P35                    | NA                | NA                                                              | NA                                | rs7496047   | NA |
| chr15 | 80215597 | 80215597 | G   | T  | ncRNA_exonic   | C15orf37                   | NA                | NA                                                              | NA                                | rs2303824   | NA |
| chr15 | 82634574 | 82634574 | C   | T  | UTR3           | GOLGA6L10                  | NA                | NA                                                              | NA                                | rs28482898  | NA |
| chr15 | 82634594 | 82634594 | A   | G  | UTR3           | GOLGA6L10                  | NA                | NA                                                              | NA                                | rs4039143   | NA |
| chr15 | 82637315 | 82637315 | C   | T  | exonic         | GOLGA6L10                  | synonymous SNV    | GOLGA6L10:NM_001164465:exon6:c.G771A:p.L257L                    | NA                                | rs200605893 | NA |
| chr15 | 82637356 | 82637356 | G   | A  | exonic         | GOLGA6L10                  | nonsynonymous SNV | GOLGA6L10:NM_001164465:exon6:c.C730T:p.R244C                    | NA                                | rs201144848 | NA |
| chr15 | 82637377 | 82637377 | G   | A  | exonic         | GOLGA6L10                  | nonsynonymous SNV | GOLGA6L10:NM_001164465:exon6:c.C709T:p.R237C                    | NA                                | rs200328108 | NA |
| chr15 | 82637378 | 82637378 | T   | C  | exonic         | GOLGA6L10                  | synonymous SNV    | GOLGA6L10:NM_001164465:exon6:c.A708G:p.L236L                    | NA                                | NA          | NA |
| chr15 | 82637419 | 82637419 | A   | G  | exonic         | GOLGA6L10                  | nonsynonymous SNV | GOLGA6L10:NM_001164465:exon6:c.T667C:p.C223R                    | NA                                | NA          | NA |
| chr15 | 82637420 | 82637420 | C   | T  | exonic         | GOLGA6L10                  | synonymous SNV    | GOLGA6L10:NM_001164465:exon6:c.G666A:p.L222L                    | NA                                | NA          | NA |
| chr15 | 82637439 | 82637439 | T   | C  | exonic         | GOLGA6L10                  | nonsynonymous SNV | GOLGA6L10:NM_001164465:exon6:c.A647G:p.H216R                    | NA                                | rs185538129 | NA |
| chr15 | 82637460 | 82637460 | T   | C  | exonic         | GOLGA6L10                  | nonsynonymous SNV | GOLGA6L10:NM_001164465:exon6:c.A626G:p.H209R                    | NA                                | rs199925595 | NA |
| chr15 | 83013665 | 83013665 | C   | T  | intergenic     | 97(dist=27238),UBE2Q2P3(di | NA                | NA                                                              | NA                                | NA          | NA |
| chr15 | 83013916 | 83013916 | A   | G  | intergenic     | 97(dist=27489),UBE2Q2P3(di | NA                | NA                                                              | NA                                | NA          | NA |
| chr15 | 83013917 | 83013917 | C   | T  | intergenic     | 97(dist=27490),UBE2Q2P3(di | NA                | NA                                                              | NA                                | NA          | NA |
| chr15 | 83502439 | 83502439 | T   | -  | UTR3           | WHAMM                      | NA                | NA                                                              | NA                                | NA          | NA |
| chr15 | 83680329 | 83680329 | G   | A  | exonic         | C15orf40                   | nonsynonymous SNV | .C31T:p.L11F,C15orf40:NM_001160115:exon1:c.C31T:p.L11F,C15orf40 | NA                                | rs17361375  | NA |
| chr15 | 85055093 | 85055093 | A   | C  | ncRNA_exonic   | GOLGA6L5                   | NA                | NA                                                              | NA                                | rs227573    | NA |
| chr15 | 85360004 | 85360004 | A   | C  | UTR5           | ALPK3                      | NA                | NA                                                              | NA                                | rs55736017  | NA |
| chr15 | 89386652 | 89386652 | G   | A  | exonic         | ACAN                       | nonsynonymous SNV | l_001135:exon6:c.G824A:p.R275Q,ACAN:NM_013227:exon6:c.G824A     | NA                                | rs34949187  | NA |
| chr15 | 89398883 | 89398883 | A   | T  | exonic         | ACAN                       | nonsynonymous SNV | 001135:exon12:c.A3067T:p.T1023S,ACAN:NM_013227:exon12:c.A306    | NA                                | NA          | NA |
| chr15 | 90170933 | 90170933 | G   | A  | UTR3           | TICRR                      | NA                | NA                                                              | NA                                | rs3743371   | NA |
| chr15 | 90349667 | 90349667 | T   | G  | exonic         | ANPEP                      | nonsynonymous SNV | ANPEP:NM_001150:exon2:c.A148C:p.T50P                            | NA                                | NA          | B  |

|       |          |          |        |    |              |                              |                      |                                                                |    |             |    |
|-------|----------|----------|--------|----|--------------|------------------------------|----------------------|----------------------------------------------------------------|----|-------------|----|
| chr15 | 91425783 | 91425783 | T      | C  | UTR3         | FURIN                        | NA                   | NA                                                             | NA | NA          | NA |
| chr15 | 92690366 | 92690366 | A      | C  | exonic       | SLCO3A1                      | synonymous SNV       | 001145044:exon8:c.A1665C:p.T555T,SLCO3A1:NM_013272:exon8:c.A   | NA | NA          | NA |
| chr15 | 98980925 | 98980925 | G      | -  | UTR3         | FAM169B                      | NA                   | NA                                                             | NA | NA          | NA |
| chr15 | 98981194 | 98981196 | GAT    | -  | UTR3         | FAM169B                      | NA                   | NA                                                             | NA | NA          | NA |
| chr15 | 98981290 | 98981290 | T      | -  | UTR3         | FAM169B                      | NA                   | NA                                                             | NA | NA          | NA |
| chr15 | 1E+08    | 1E+08    | G      | C  | UTR3         | MEF2A                        | NA                   | NA                                                             | NA | rs325382    | NA |
| chr15 | 1E+08    | 1E+08    | C      | T  | ncRNA_exonic | DNM1P46                      | NA                   | NA                                                             | NA | NA          | NA |
| chr15 | 1E+08    | 1E+08    | G      | T  | ncRNA_exonic | DNM1P46                      | NA                   | NA                                                             | NA | NA          | NA |
| chr15 | 1E+08    | 1E+08    | T      | C  | ncRNA_exonic | DNM1P46                      | NA                   | NA                                                             | NA | NA          | NA |
| chr16 | 449109   | 449109   | A      | G  | exonic       | NME4                         | nonsynonymous SNV    | NME4:NM_005009:exon2:c.A211G:p.M71V                            | NA | NA          | D  |
| chr16 | 602313   | 602313   | C      | A  | exonic       | SOLH                         | synonymous SNV       | SOLH:NM_005632:exon11:c.C2520A:p.A840A                         | NA | rs9930550   | NA |
| chr16 | 822742   | 822742   | T      | G  | intergenic   | 62(dist=2465),RPU5D1(dist=1  | NA                   | NA                                                             | NA | NA          | NA |
| chr16 | 848213   | 848213   | T      | G  | UTR3         | GNG13                        | NA                   | NA                                                             | NA | NA          | NA |
| chr16 | 1036733  | 1036733  | C      | T  | UTR3         | SOX8                         | NA                   | NA                                                             | NA | NA          | NA |
| chr16 | 1146228  | 1146228  | C      | T  | UTR5         | C1QTNF8                      | NA                   | NA                                                             | NA | rs2076422   | NA |
| chr16 | 1252259  | 1252259  | A      | G  | exonic       | CACNA1H                      | synonymous SNV       | 001005407:exon9:c.A1809G:p.R603R,CACNA1H:NM_021098:exon9:c.A   | NA | rs9934839   | NA |
| chr16 | 1258193  | 1258193  | A      | C  | exonic       | CACNA1H                      | nonsynonymous SNV    | 0005407:exon16:c.A3335C:p.D1112A,CACNA1H:NM_021098:exon16:c    | NA | rs202114960 | NA |
| chr16 | 1291308  | 1291308  | A      | G  | exonic       | TPSAB1                       | synonymous SNV       | TPSAB1:NM_003294:exon3:c.A216G:p.A72A                          | NA | rs201568970 | NA |
| chr16 | 1291608  | 1291608  | A      | G  | exonic       | TPSAB1                       | nonsynonymous SNV    | TPSAB1:NM_003294:exon4:c.A407G:p.H136R                         | NA | rs1064780   | B  |
| chr16 | 1291623  | 1291623  | C      | T  | exonic       | TPSAB1                       | nonsynonymous SNV    | TPSAB1:NM_003294:exon4:c.C422T:p.T141I                         | NA | rs1064781   | P  |
| chr16 | 1291639  | 1291639  | A      | G  | exonic       | TPSAB1                       | synonymous SNV       | TPSAB1:NM_003294:exon4:c.A438G:p.S146S                         | NA | rs1064783   | NA |
| chr16 | 1291941  | 1291941  | G      | A  | exonic       | TPSAB1                       | nonsynonymous SNV    | TPSAB1:NM_003294:exon5:c.G613A:p.V205I                         | NA | rs1060284   | B  |
| chr16 | 1306523  | 1306523  | G      | T  | exonic       | TPSD1                        | nonsynonymous SNV    | TPSD1:NM_012217:exon2:c.G89T:p.G30V                            | NA | rs2401937   | D  |
| chr16 | 1414996  | 1414996  | T      | -  | UTR3         | UNKL                         | NA                   | NA                                                             | NA | rs112378427 | NA |
| chr16 | 1484392  | 1484392  | G      | C  | UTR3         | CCDC154                      | NA                   | NA                                                             | NA | rs12598718  | NA |
| chr16 | 1545448  | 1545448  | A      | G  | exonic       | TELO2                        | nonsynonymous SNV    | TELO2:NM_016111:exon3:c.A437G:p.Q146R                          | NA | rs2235624   | B  |
| chr16 | 1591962  | 1591962  | G      | A  | exonic       | TMEM204                      | synonymous SNV       | _024600:exon2:c.G321A:p.T107T,TMEM204:NM_001256541:exon3:c.C   | NA | rs2076443   | NA |
| chr16 | 1876949  | 1876949  | G      | C  | UTR5         | HAGH                         | NA                   | NA                                                             | NA | rs7188401   | NA |
| chr16 | 1878295  | 1878295  | G      | A  | UTR3         | FAHD1                        | NA                   | NA                                                             | NA | NA          | NA |
| chr16 | 2052320  | 2052320  | T      | G  | exonic       | ZNF598                       | nonsynonymous SNV    | ZNF598:NM_178167:exon7:c.A782C:p.D261A                         | NA | NA          | NA |
| chr16 | 2052345  | 2052345  | T      | G  | exonic       | ZNF598                       | nonsynonymous SNV    | ZNF598:NM_178167:exon7:c.A757C:p.T253P                         | NA | NA          | NA |
| chr16 | 2121850  | 2121850  | -      | C  | exonic       | TSC2                         | frameshift insertion | 71fs,TSC2:NM_001077183:exon19:c.2012_2013insC:p.G671fs,TSC2:NM | NA | NA          | NA |
| chr16 | 2653536  | 2653536  | T      | G  | ncRNA_exonic | LOC652276                    | NA                   | NA                                                             | NA | NA          | NA |
| chr16 | 3077670  | 3077670  | A      | C  | UTR3         | THOC6                        | NA                   | NA                                                             | NA | NA          | NA |
| chr16 | 3079685  | 3079685  | T      | C  | exonic       | CCDC64B                      | nonsynonymous SNV    | CCDC64B:NM_001103175:exon5:c.A818G:p.Q273R                     | NA | rs2244494   | NA |
| chr16 | 3292666  | 3292666  | T      | C  | UTR3         | MEFV                         | NA                   | NA                                                             | NA | rs11466052  | NA |
| chr16 | 3292673  | 3292675  | AAA    | -  | UTR3         | MEFV                         | NA                   | NA                                                             | NA | rs61379197  | NA |
| chr16 | 3304762  | 3304762  | A      | G  | exonic       | MEFV                         | synonymous SNV       | MEFV:NM_000243:exon2:c.T306C:p.D102D                           | NA | rs224225    | NA |
| chr16 | 7761230  | 7761230  | A      | -  | UTR3         | RBFOX1                       | NA                   | NA                                                             | NA | rs59509314  | NA |
| chr16 | 8986464  | 8986468  | AAAAA  | -  | UTR3         | USP7                         | NA                   | NA                                                             | NA | rs141993088 | NA |
| chr16 | 10624908 | 10624908 | G      | A  | UTR3         | EMP2                         | NA                   | NA                                                             | NA | rs7187959   | NA |
| chr16 | 11962217 | 11962217 | T      | -  | UTR3         | GSPT1                        | NA                   | NA                                                             | NA | NA          | NA |
| chr16 | 15818992 | 15818992 | A      | -  | UTR3         | NDE1                         | NA                   | NA                                                             | NA | NA          | NA |
| chr16 | 19131760 | 19131760 | T      | -  | UTR3         | ITPRIPL2                     | NA                   | NA                                                             | NA | rs112434410 | NA |
| chr16 | 19513697 | 19513702 | TTTTTT | -  | UTR3         | GDE1                         | NA                   | NA                                                             | NA | NA          | NA |
| chr16 | 19563849 | 19563851 | AAA    | -  | UTR3         | CCP110                       | NA                   | NA                                                             | NA | NA          | NA |
| chr16 | 20870169 | 20870169 | A      | T  | UTR3         | DCUN1D3                      | NA                   | NA                                                             | NA | NA          | NA |
| chr16 | 21191514 | 21191514 | G      | T  | UTR3         | TMEM159                      | NA                   | NA                                                             | NA | NA          | NA |
| chr16 | 22546026 | 22546026 | A      | C  | exonic       | LOC100132247                 | synonymous SNV       | LOC100132247:NM_001135865:exon7:c.A1722C:p.T574T               | NA | NA          | NA |
| chr16 | 22546469 | 22546469 | A      | C  | exonic       | LOC100132247                 | nonsynonymous SNV    | LOC100132247:NM_001135865:exon7:c.A2165C:p.H722P               | NA | NA          | NA |
| chr16 | 23076644 | 23076644 | A      | -  | UTR3         | USP31                        | NA                   | NA                                                             | NA | NA          | NA |
| chr16 | 24835459 | 24835459 | G      | C  | UTR3         | TNRC6A                       | NA                   | NA                                                             | NA | rs112183094 | NA |
| chr16 | 25250585 | 25250586 | AA     | -  | UTR3         | ZKSCAN2                      | NA                   | NA                                                             | NA | rs58897018  | NA |
| chr16 | 29381579 | 29381579 | A      | -  | intergenic   | 2(dist=5199),LOC606724(dist: | NA                   | NA                                                             | NA | NA          | NA |
| chr16 | 29821984 | 29821984 | T      | -  | UTR3         | MAZ                          | NA                   | NA                                                             | NA | rs71650270  | NA |
| chr16 | 29910394 | 29910394 | A      | C  | UTR5         | SEZ6L2                       | NA                   | NA                                                             | NA | NA          | NA |
| chr16 | 31003411 | 31003411 | -      | AC | UTR3         | STX1B                        | NA                   | NA                                                             | NA | rs112607901 | NA |
| chr16 | 34404050 | 34404050 | T      | G  | ncRNA_exonic | UBE2MP1                      | NA                   | NA                                                             | NA | NA          | NA |
| chr16 | 48226479 | 48226479 | C      | T  | exonic       | ABCC11                       | synonymous SNV       | A:p.K886K,ABCC11:NM_032583:exon20:c.G2658A:p.K886K,ABCC11:N    | NA | rs12443685  | NA |
| chr16 | 50832526 | 50832526 | A      | -  | UTR3         | CYLD                         | NA                   | NA                                                             | NA | rs111804189 | NA |
| chr16 | 54320197 | 54320197 | G      | T  | UTR5         | IRX3                         | NA                   | NA                                                             | NA | rs3751723   | NA |
| chr16 | 54967096 | 54967096 | C      | A  | exonic       | IRX5                         | nonsynonymous SNV    | _001252197:exon3:c.C760A:p.P254T,IRX5:NM_005853:exon3:c.C763A  | NA | rs13336114  | B  |
| chr16 | 55798671 | 55798671 | G      | A  | ncRNA_exonic | CES1P1                       | NA                   | NA                                                             | NA | rs34649320  | NA |
| chr16 | 55798733 | 55798733 | G      | C  | ncRNA_exonic | CES1P1                       | NA                   | NA                                                             | NA | rs35384853  | NA |
| chr16 | 55798759 | 55798759 | T      | C  | ncRNA_exonic | CES1P1                       | NA                   | NA                                                             | NA | rs71374087  | NA |
| chr16 | 55798763 | 55798763 | A      | G  | ncRNA_exonic | CES1P1                       | NA                   | NA                                                             | NA | rs71374088  | NA |

|       |          |          |       |          |              |           |                        |                                                                |    |             |    |
|-------|----------|----------|-------|----------|--------------|-----------|------------------------|----------------------------------------------------------------|----|-------------|----|
| chr16 | 55798778 | 55798778 | A     | G        | ncRNA_exonic | CES1P1    | NA                     | NA                                                             | NA | rs76167618  | NA |
| chr16 | 55798783 | 55798783 | A     | G        | ncRNA_exonic | CES1P1    | NA                     | NA                                                             | NA | rs75712934  | NA |
| chr16 | 56691861 | 56691861 | T     | C        | UTR5         | MT1F      | NA                     | NA                                                             | NA | NA          | NA |
| chr16 | 57091977 | 57091977 | T     | C        | exonic       | NLRC5     | synonymous SNV         | NLRC5:NM_032206:exon27:c.T3747C:p.D1249D                       | NA | rs7206703   | NA |
| chr16 | 57398706 | 57398706 | -     | T        | UTR3         | CCL22     | NA                     | NA                                                             | NA | rs57450696  | NA |
| chr16 | 66638219 | 66638219 | A     | T        | upstream     | CMTM3     | NA                     | NA                                                             | NA | rs146585124 | NA |
| chr16 | 67201665 | 67201665 | A     | G        | exonic       | HSF4      | synonymous SNV         | HSF4:NM_001040667:exon11:c.A897G:p.P299P                       | NA | NA          | NA |
| chr16 | 67841129 | 67841129 | T     | G        | UTR5         | TSNAXIP1  | NA                     | NA                                                             | NA | rs7199443   | NA |
| chr16 | 67905065 | 67905065 | C     | T        | UTR3         | NUTF2     | NA                     | NA                                                             | NA | NA          | NA |
| chr16 | 68678505 | 68678505 | G     | T        | UTR5         | CDH3      | NA                     | NA                                                             | NA | NA          | NA |
| chr16 | 69151479 | 69151479 | -     | T        | UTR3         | HAS3      | NA                     | NA                                                             | NA | NA          | NA |
| chr16 | 69339663 | 69339663 | T     | -        | UTR3         | SNTB2     | NA                     | NA                                                             | NA | NA          | NA |
| chr16 | 70010369 | 70010369 | C     | G        | ncRNA_exonic | PDXDC2P   | NA                     | NA                                                             | NA | rs187431035 | NA |
| chr16 | 70010370 | 70010370 | A     | G        | ncRNA_exonic | PDXDC2P   | NA                     | NA                                                             | NA | NA          | NA |
| chr16 | 70010374 | 70010374 | A     | G        | ncRNA_exonic | PDXDC2P   | NA                     | NA                                                             | NA | NA          | NA |
| chr16 | 70010380 | 70010380 | C     | T        | ncRNA_exonic | PDXDC2P   | NA                     | NA                                                             | NA | NA          | NA |
| chr16 | 70011129 | 70011129 | G     | A        | ncRNA_exonic | PDXDC2P   | NA                     | NA                                                             | NA | NA          | NA |
| chr16 | 70011173 | 70011173 | A     | G        | ncRNA_exonic | PDXDC2P   | NA                     | NA                                                             | NA | NA          | NA |
| chr16 | 71025245 | 71025245 | C     | T        | exonic       | HYDIN     | synonymous SNV         | HYDIN:NM_001270974:exon25:c.G3840A:p.T1280T                    | NA | rs116894611 | NA |
| chr16 | 72058667 | 72058667 | G     | A        | UTR3         | DHODH     | NA                     | NA                                                             | NA | rs113365769 | NA |
| chr16 | 72820483 | 72820483 | C     | A        | UTR3         | ZFX3      | NA                     | NA                                                             | NA | rs200323038 | NA |
| chr16 | 74486093 | 74486093 | A     | C        | UTR3         | GLG1      | NA                     | NA                                                             | NA | NA          | NA |
| chr16 | 74655601 | 74655601 | G     | T        | UTR3         | RFWD3     | NA                     | NA                                                             | NA | rs71386224  | NA |
| chr16 | 81744503 | 81744503 | A     | C        | UTR3         | CMIP      | NA                     | NA                                                             | NA | NA          | NA |
| chr16 | 85125545 | 85125545 | TTTTT | -        | UTR3         | KIAA0513  | NA                     | NA                                                             | NA | NA          | NA |
| chr16 | 85695241 | 85695241 | G     | A        | exonic       | GSE1      | synonymous SNV         | 001134473:exon8:c.G1818A:p.S606S,GSE1:NM_014615:exon9:c.G213G  | NA | NA          | NA |
| chr16 | 85695242 | 85695242 | C     | G        | exonic       | GSE1      | nonsynonymous SNV      | 001134473:exon8:c.C1819G;p.P607A,GSE1:NM_014615:exon9:c.C213G  | NA | NA          | D  |
| chr16 | 85695243 | 85695243 | C     | G        | exonic       | GSE1      | nonsynonymous SNV      | 001134473:exon8:c.C1820G;p.P607R,GSE1:NM_014615:exon9:c.C213G  | NA | NA          | D  |
| chr16 | 85695244 | 85695244 | C     | A        | exonic       | GSE1      | synonymous SNV         | 001134473:exon8:c.C1821A;p.P607P,GSE1:NM_014615:exon9:c.C213G  | NA | NA          | NA |
| chr16 | 88506287 | 88506287 | -     | TCTGACCA | UTR3         | ZNF469    | NA                     | NA                                                             | NA | rs3838248   | NA |
| chr16 | 88552370 | 88552370 | A     | G        | exonic       | ZFPM1     | nonsynonymous SNV      | ZFPM1:NM_153813:exon2:c.A64G:p.R22G                            | NA | rs3751673   | NA |
| chr16 | 88599696 | 88599697 | GA    | -        | exonic       | ZFPM1     | frameshift deletion    | ZFPM1:NM_153813:exon10:c.1330_1331del:p.444_444del             | NA | rs67712719  | NA |
| chr16 | 88599701 | 88599701 | T     | -        | exonic       | ZFPM1     | frameshift deletion    | ZFPM1:NM_153813:exon10:c.1335delT:p.P445fs                     | NA | rs67322929  | NA |
| chr16 | 88599703 | 88599705 | TGG   | -        | exonic       | ZFPM1     | nonframeshift deletion | ZFPM1:NM_153813:exon10:c.1337_1339del:p.446_447del             | NA | rs67873604  | NA |
| chr16 | 89346906 | 89346906 | T     | G        | exonic       | ANKRD11   | nonsynonymous SNV      | p.Y2015S,ANKRD11:NM_013275:exon9:c.A6044C:p.Y2015S,ANKRD11:    | NA | NA          | D  |
| chr16 | 90061507 | 90061507 | T     | A        | ncRNA_exonic | AFG3L1P   | NA                     | NA                                                             | NA | NA          | NA |
| chr16 | 90061738 | 90061738 | T     | C        | ncRNA_exonic | AFG3L1P   | NA                     | NA                                                             | NA | NA          | NA |
| chr16 | 90062158 | 90062158 | A     | G        | ncRNA_exonic | AFG3L1P   | NA                     | NA                                                             | NA | NA          | NA |
| chr17 | 263576   | 263576   | T     | C        | exonic       | C17orf97  | synonymous SNV         | C17orf97:NM_001013672:exon2:c.T942C:p.G314G                    | NA | rs111445631 | NA |
| chr17 | 292322   | 292322   | A     | -        | UTR3         | FAM101B   | NA                     | NA                                                             | NA | rs139875162 | NA |
| chr17 | 416962   | 416962   | T     | C        | UTR3         | VPS53     | NA                     | NA                                                             | NA | rs8080942   | NA |
| chr17 | 417718   | 417718   | T     | C        | UTR3         | VPS53     | NA                     | NA                                                             | NA | NA          | NA |
| chr17 | 418519   | 418519   | -     | G        | UTR3         | VPS53     | NA                     | NA                                                             | NA | rs146415154 | NA |
| chr17 | 1090273  | 1090273  | G     | C        | UTR5         | ABR       | NA                     | NA                                                             | NA | rs3813440   | NA |
| chr17 | 1683882  | 1683882  | C     | A        | UTR3         | SMYD4     | NA                     | NA                                                             | NA | NA          | NA |
| chr17 | 1839009  | 1839009  | A     | G        | UTR3         | RTN4RL1   | NA                     | NA                                                             | NA | rs188773038 | NA |
| chr17 | 1839011  | 1839011  | A     | G        | UTR3         | RTN4RL1   | NA                     | NA                                                             | NA | rs201978444 | NA |
| chr17 | 1964759  | 1964759  | -     | G        | UTR3         | SMG6      | NA                     | NA                                                             | NA | rs145926620 | NA |
| chr17 | 2595964  | 2595964  | G     | A        | exonic       | CLUH      | synonymous SNV         | CLUH:NM_015229:exon21:c.C3222T:p.A1074A                        | NA | rs2302199   | NA |
| chr17 | 2938272  | 2938272  | T     | -        | UTR3         | RAP1GAP2  | NA                     | NA                                                             | NA | rs71830536  | NA |
| chr17 | 3343519  | 3343519  | T     | C        | exonic       | SPATA22   | synonymous SNV         | G:p.E338E,SPATA22:NM_001170697:exon9:c.A1014G:p.E338E,SPATA22  | NA | rs17822627  | NA |
| chr17 | 3447914  | 3447914  | C     | T        | exonic       | TRPV3     | synonymous SNV         | _001258205:exon4:c.G270A:p.Q90Q,TRPV3:NM_145068:exon4:c.G270A  | NA | rs1039519   | NA |
| chr17 | 3539835  | 3539835  | T     | C        | UTR5         | CTNS      | NA                     | NA                                                             | NA | rs111977802 | NA |
| chr17 | 4461935  | 4461935  | A     | C        | exonic       | GGT6      | nonsynonymous SNV      | _153338:exon3:c.T761G:p.V254G,GGT6:NM_001122890:exon4:c.T857G  | NA | NA          | B  |
| chr17 | 6327551  | 6327551  | G     | A        | UTR3         | AIPL1     | NA                     | NA                                                             | NA | rs907938    | NA |
| chr17 | 6328628  | 6328629  | TT    | -        | UTR3         | AIPL1     | NA                     | NA                                                             | NA | rs56845881  | NA |
| chr17 | 6556538  | 6556538  | G     | C        | UTR3         | C17orf100 | NA                     | NA                                                             | NA | rs4796533   | NA |
| chr17 | 6556541  | 6556541  | A     | T        | UTR3         | C17orf100 | NA                     | NA                                                             | NA | rs4796343   | NA |
| chr17 | 7097657  | 7097657  | A     | C        | exonic       | DLG4      | nonsynonymous SNV      | 01128827:exon12:c.T1450G;p.F484V,DLG4:NM_001365:exon14:c.T150G | NA | NA          | NA |
| chr17 | 7190439  | 7190439  | T     | C        | UTR3         | SLC2A4    | NA                     | NA                                                             | NA | NA          | NA |
| chr17 | 7190440  | 7190440  | T     | C        | UTR3         | SLC2A4    | NA                     | NA                                                             | NA | rs55782239  | NA |
| chr17 | 7554536  | 7554536  | T     | C        | UTR5         | ATP1B2    | NA                     | NA                                                             | NA | rs1050528   | NA |
| chr17 | 8294348  | 8294348  | T     | -        | UTR3         | RNF222    | NA                     | NA                                                             | NA | NA          | NA |
| chr17 | 8731943  | 8731943  | T     | C        | exonic       | PIK3R6    | unknown                | UNKNOWN                                                        | NA | rs140947985 | NA |
| chr17 | 10633539 | 10633542 | AAAA  | -        | ncRNA_UTR5   | TMEM220   | NA                     | NA                                                             | NA | rs59392100  | NA |
| chr17 | 11513845 | 11513845 | G     | T        | exonic       | DNAH9     | nonsynonymous SNV      | DNAH9:NM_001372:exon3:c.G747T:p.K249N                          | NA | NA          | B  |

|       |          |          |          |        |              |              |                   |                                                                                             |    |             |    |
|-------|----------|----------|----------|--------|--------------|--------------|-------------------|---------------------------------------------------------------------------------------------|----|-------------|----|
| chr17 | 13928567 | 13928567 | C        | G      | ncRNA_exonic | CDRT15P1     | NA                | NA                                                                                          | NA | rs148540138 | NA |
| chr17 | 15621245 | 15621245 | -        | T      | UTR3         | ZNF286A      | NA                | NA                                                                                          | NA | NA          | NA |
| chr17 | 16285719 | 16285719 | T        | C      | exonic       | UBB          | synonymous SNV    | UBB:NM_018955:exon2:c.T498C;p.T166T                                                         | NA | rs1060763   | NA |
| chr17 | 16318932 | 16318932 | T        | C      | UTR5         | TRPV2        | NA                | NA                                                                                          | NA | rs3813769   | NA |
| chr17 | 16344891 | 16344891 | T        | -      | ncRNA_exonic | C17orf76-AS1 | NA                | NA                                                                                          | NA | rs71831095  | NA |
| chr17 | 17680560 | 17680560 | T        | G      | ncRNA_exonic | SMCR5        | NA                | NA                                                                                          | NA | rs941445    | NA |
| chr17 | 17714851 | 17714851 | G        | -      | UTR3         | SREBF1       | NA                | NA                                                                                          | NA | rs11304210  | NA |
| chr17 | 17942613 | 17942613 | C        | T      | UTR5         | GID4         | NA                | NA                                                                                          | NA | rs7406982   | NA |
| chr17 | 17997209 | 17997209 | G        | A      | exonic       | DRG2         | synonymous SNV    | DRG2:NM_001388:exon2:c.G147A:p.S49S                                                         | NA | rs2230316   | NA |
| chr17 | 18291544 | 18291544 | A        | G      | exonic       | EVPLL        | synonymous SNV    | EVPLL:NM_001145127:exon10:c.A888G;p.P296P                                                   | NA | rs586322    | NA |
| chr17 | 20354836 | 20354836 | A        | G      | exonic       | LGALS9B      | synonymous SNV    | LGALS9B:NM_001042685:exon10:c.T879C;p.S293S                                                 | NA | rs150485558 | NA |
| chr17 | 20407483 | 20407483 | T        | C      | ncRNA_exonic | KRT16P3      | NA                | NA                                                                                          | NA | NA          | NA |
| chr17 | 20767808 | 20767808 | C        | G      | UTR3         | CCDC144NL    | NA                | NA                                                                                          | NA | rs141460191 | NA |
| chr17 | 21207813 | 21207813 | T        | G      | exonic       | MAP2K3       | nonsynonymous SNV | V_002756:exon8:c.T557G;p.L186W,MAP2K3:NM_145109:exon8:c.T64                                 | NA | rs74575904  | D  |
| chr17 | 21207835 | 21207835 | G        | A      | exonic       | MAP2K3       | synonymous SNV    | V_002756:exon8:c.G579A;p.T193T,MAP2K3:NM_145109:exon8:c.G66=COSM1179253;OCCURENCE=1(prostat | NA | rs76111309  | NA |
| chr17 | 21207844 | 21207844 | C        | T      | exonic       | MAP2K3       | synonymous SNV    | V_002756:exon8:c.C588T;p.A196A,MAP2K3:NM_145109:exon8:c.C67                                 | NA | rs2230436   | NA |
| chr17 | 21320787 | 21320787 | G        | A      | UTR3         | KCNJ12       | NA                | NA                                                                                          | NA | rs76105604  | NA |
| chr17 | 21320854 | 21320854 | A        | -      | UTR3         | KCNJ12       | NA                | NA                                                                                          | NA | rs67230821  | NA |
| chr17 | 21322880 | 21322880 | A        | C      | UTR3         | KCNJ12       | NA                | NA                                                                                          | NA | rs79110818  | NA |
| chr17 | 21322883 | 21322883 | G        | A      | UTR3         | KCNJ12       | NA                | NA                                                                                          | NA | rs78171447  | NA |
| chr17 | 21911267 | 21911268 | TG       | -      | ncRNA_exonic | FLJ36000     | NA                | NA                                                                                          | NA | NA          | NA |
| chr17 | 27581500 | 27581500 | -        | A      | UTR3         | CRYBA1       | NA                | NA                                                                                          | NA | NA          | NA |
| chr17 | 31618865 | 31618865 | A        | C      | exonic       | ASIC2        | nonsynonymous SNV | ASIC2:NM_183377:exon1:c.T269G;p.V90G                                                        | NA | NA          | NA |
| chr17 | 32903526 | 32903526 | G        | A      | UTR3         | C17orf102    | NA                | NA                                                                                          | NA | rs9891306   | NA |
| chr17 | 33765127 | 33765127 | A        | -      | UTR3         | SLFN13       | NA                | NA                                                                                          | NA | rs11337992  | NA |
| chr17 | 34493108 | 34493108 | T        | G      | UTR3         | TBC1D3B      | NA                | NA                                                                                          | NA | NA          | NA |
| chr17 | 34493194 | 34493194 | T        | C      | UTR3         | TBC1D3B      | NA                | NA                                                                                          | NA | rs79500369  | NA |
| chr17 | 36883387 | 36883387 | T        | -      | UTR3         | MLLT6        | NA                | NA                                                                                          | NA | NA          | NA |
| chr17 | 37221649 | 37221650 | TT       | -      | ncRNA_UTR3   | PLXDC1       | NA                | NA                                                                                          | NA | rs149203975 | NA |
| chr17 | 37562813 | 37562813 | T        | -      | UTR3         | MED1         | NA                | NA                                                                                          | NA | NA          | NA |
| chr17 | 37688356 | 37688361 | TCTCTC   | -      | UTR3         | CDK12        | NA                | NA                                                                                          | NA | rs71843922  | NA |
| chr17 | 38122680 | 38122680 | G        | T      | exonic       | GSDMA        | nonsynonymous SNV | GSDMA:NM_178171:exon3:c.G382T;p.V128L                                                       | NA | rs7212938   | NA |
| chr17 | 38122686 | 38122686 | G        | A      | exonic       | GSDMA        | nonsynonymous SNV | GSDMA:NM_178171:exon3:c.G388A;p.E130K                                                       | NA | rs7212944   | NA |
| chr17 | 39139370 | 39139370 | G        | A      | exonic       | KRT40        | nonsynonymous SNV | KRT40:NM_182497:exon4:c.C458T;p.T153M                                                       | NA | rs9908304   | D  |
| chr17 | 39240791 | 39240791 | C        | T      | exonic       | KRTAP4-7     | synonymous SNV    | KRTAP4-7:NM_033061:exon1:c.C333T;p.R111R                                                    | NA | NA          | NA |
| chr17 | 39254143 | 39254143 | C        | T      | exonic       | KRTAP4-8     | nonsynonymous SNV | KRTAP4-8:NM_031960:exon1:c.G194A;p.C65Y                                                     | NA | NA          | NA |
| chr17 | 39316570 | 39316570 | T        | C      | exonic       | KRTAP4-4     | nonsynonymous SNV | KRTAP4-4:NM_032524:exon1:c.A374G;p.Y125C                                                    | NA | rs111563615 | NA |
| chr17 | 39316746 | 39316746 | A        | G      | exonic       | KRTAP4-4     | synonymous SNV    | KRTAP4-4:NM_032524:exon1:c.T198C;p.C66C                                                     | NA | NA          | NA |
| chr17 | 39340786 | 39340786 | A        | G      | exonic       | KRTAP4-1     | synonymous SNV    | KRTAP4-1:NM_033060:exon2:c.T264C;p.C88C                                                     | NA | rs2320228   | NA |
| chr17 | 39675023 | 39675023 | T        | C      | exonic       | KRT15        | synonymous SNV    | KRT15:NM_002275:exon1:c.A57G;p.R19R                                                         | NA | NA          | NA |
| chr17 | 40465420 | 40465420 | G        | -      | UTR3         | STAT3        | NA                | NA                                                                                          | NA | NA          | NA |
| chr17 | 41031196 | 41031196 | A        | -      | ncRNA_exonic | LINC00671    | NA                | NA                                                                                          | NA | NA          | NA |
| chr17 | 41144609 | 41144609 | G        | A      | UTR3         | RUNDC1       | NA                | NA                                                                                          | NA | rs201072724 | NA |
| chr17 | 41181922 | 41181923 | AA       | -      | UTR3         | RND2         | NA                | NA                                                                                          | NA | NA          | NA |
| chr17 | 42113045 | 42113045 | -        | A      | UTR3         | LSM12        | NA                | NA                                                                                          | NA | NA          | NA |
| chr17 | 42248239 | 42248239 | C        | A      | exonic       | ASB16        | synonymous SNV    | ASB16:NM_080863:exon1:c.C82A;p.R28R                                                         | NA | rs144229400 | NA |
| chr17 | 42266708 | 42266708 | A        | G      | exonic       | TMUB2        | synonymous SNV    | G:p.G98G,TMUB2:NM_177441:exon2:c.A294G;p.G98G,TMUB2:NM_0                                    | NA | NA          | NA |
| chr17 | 42284469 | 42284469 | T        | -      | UTR3         | UBTF         | NA                | NA                                                                                          | NA | NA          | NA |
| chr17 | 43101699 | 43101708 | TGTGTGTG | -      | UTR3         | DCAKD        | NA                | NA                                                                                          | NA | NA          | NA |
| chr17 | 44374362 | 44374362 | T        | C      | exonic       | LRRC37A      | synonymous SNV    | LRRC37A:NM_014834:exon1:c.T1863C;p.P621P                                                    | NA | rs17854018  | NA |
| chr17 | 45055759 | 45055759 | -        | AA     | UTR3         | RPRML        | NA                | NA                                                                                          | NA | NA          | NA |
| chr17 | 45214564 | 45214564 | A        | T      | exonic       | CDC27        | nonsynonymous SNV | 01114091:exon14:c.T1885A;p.C629S,CDC27:NM_001256:exon14:c.T11179254,COSM1179255;OCCURENCE=1 | NA | rs201184967 | NA |
| chr17 | 45214606 | 45214606 | G        | T      | exonic       | CDC27        | nonsynonymous SNV | 01114091:exon14:c.C1843A;p.H615N,CDC27:NM_001256:exon14:c.C1                                | NA | rs79260965  | NA |
| chr17 | 45214636 | 45214636 | T        | C      | exonic       | CDC27        | nonsynonymous SNV | 01114091:exon14:c.A1813G;p.N605D,CDC27:NM_001256:exon14:c.A1                                | NA | rs200200993 | NA |
| chr17 | 45234430 | 45234430 | A        | G      | exonic       | CDC27        | nonsynonymous SNV | 01114091:exon7:c.T691C;p.S231P,CDC27:NM_001256:exon7:c.T69                                  | NA | rs78072949  | B  |
| chr17 | 45234707 | 45234707 | T        | A      | exonic       | CDC27        | nonsynonymous SNV | 01114091:exon6:c.A519T;p.L173F,CDC27:NM_001256:exon6:c.A51                                  | NA | rs75353677  | B  |
| chr17 | 45502222 | 45502222 | C        | T      | intronic     | EFCAB13      | NA                | NA                                                                                          | NA | NA          | NA |
| chr17 | 47373330 | 47373330 | G        | A      | UTR3         | ZNF652       | NA                | NA                                                                                          | NA | NA          | NA |
| chr17 | 47373333 | 47373333 | C        | A      | UTR3         | ZNF652       | NA                | NA                                                                                          | NA | NA          | NA |
| chr17 | 47676880 | 47676880 | G        | -      | UTR3         | SPOP         | NA                | NA                                                                                          | NA | rs11316512  | NA |
| chr17 | 48542139 | 48542139 | -        | T      | UTR3         | CHAD         | NA                | NA                                                                                          | NA | rs60053197  | NA |
| chr17 | 48701735 | 48701735 | G        | T      | exonic       | CACNA1G      | nonsynonymous SNV | 02T:p.V1978F,CACNA1G:NM_198379:exon34:c.G6007T;p.V2003F,CACN                                | NA | NA          | NA |
| chr17 | 48771502 | 48771502 | G        | A      | UTR3         | ANKRD40      | NA                | NA                                                                                          | NA | rs11079923  | NA |
| chr17 | 48771507 | 48771507 | G        | A      | UTR3         | ANKRD40      | NA                | NA                                                                                          | NA | rs199897066 | NA |
| chr17 | 49041948 | 49041948 | -        | A      | UTR3         | SPAG9        | NA                | NA                                                                                          | NA | NA          | NA |
| chr17 | 53402169 | 53402169 | -        | GTGTGC | UTR3         | HLF          | NA                | NA                                                                                          | NA | NA          | NA |

|       |          |          |      |        |                |              |                   |                                                                           |             |             |    |
|-------|----------|----------|------|--------|----------------|--------------|-------------------|---------------------------------------------------------------------------|-------------|-------------|----|
| chr17 | 54450038 | 54450038 | C    | A      | exonic         | ANKFN1       | synonymous SNV    | ANKFN1:NM_153228:exon6:c.C642A:p.L214L                                    | NA          | rs957724    | NA |
| chr17 | 54965932 | 54965932 | A    | G      | UTR3           | TRIM25       | NA                | NA                                                                        | NA          | rs7615      | NA |
| chr17 | 55197932 | 55197932 | A    | -      | UTR3           | AKAP1        | NA                | NA                                                                        | NA          | NA          | NA |
| chr17 | 56438301 | 56438301 | G    | A      | exonic         | RNF43        | nonsynonymous SNV | RNF43:NM_017763:exon7:c.C692T:p.P231L                                     | NA          | rs2680701   | P  |
| chr17 | 57773034 | 57773037 | AAAA | -      | UTR3           | CLTC         | NA                | NA                                                                        | NA          | rs139136427 | NA |
| chr17 | 58524282 | 58524282 | A    | -      | UTR3           | APPBP2       | NA                | NA                                                                        | NA          | NA          | NA |
| chr17 | 60342552 | 60342552 | T    | C      | ncRNA_exonic   | TBC1D3P2     | NA                | NA                                                                        | NA          | rs200812362 | NA |
| chr17 | 60342600 | 60342600 | T    | G      | ncRNA_exonic   | TBC1D3P2     | NA                | NA                                                                        | NA          | rs62069087  | NA |
| chr17 | 62122724 | 62122724 | T    | G      | exonic         | ERN1         | nonsynonymous SNV | ERN1:NM_001433:exon20:c.A2648C:p.Q883P                                    | NA          | NA          | NA |
| chr17 | 62400086 | 62400086 | -    | C      | UTR3           | PECAM1       | NA                | NA                                                                        | NA          | rs35975413  | NA |
| chr17 | 62541835 | 62541835 | A    | -      | UTR3           | SMURF2       | NA                | NA                                                                        | NA          | NA          | NA |
| chr17 | 62541865 | 62541865 | A    | -      | UTR3           | SMURF2       | NA                | NA                                                                        | NA          | NA          | NA |
| chr17 | 66122028 | 66122028 | A    | -      | ncRNA_exonic   | LINC00674    | NA                | NA                                                                        | NA          | NA          | NA |
| chr17 | 71332317 | 71332317 | A    | -      | UTR3           | SDK2         | NA                | NA                                                                        | NA          | NA          | NA |
| chr17 | 72700943 | 72700943 | A    | G      | exonic         | CD300LF      | nonsynonymous SNV | CD300LF:NM_139018:exon2:c.T56C:p.V19A                                     | NA          | rs35489971  | B  |
| chr17 | 73060246 | 73060246 | A    | C      | UTR3           | KCTD2        | NA                | NA                                                                        | NA          | NA          | NA |
| chr17 | 73498845 | 73498845 | T    | G      | exonic         | CASKIN2      | synonymous SNV    | 01142643:exon17:c.A2064C:p.P688P,CASKIN2:NM_020753:exon18:c./             | NA          | NA          | NA |
| chr17 | 73606310 | 73606310 | G    | A      | ncRNA_exonic   | MYO15B       | NA                | NA                                                                        | NA          | rs11657863  | NA |
| chr17 | 73812867 | 73812867 | C    | T      | exonic         | UNK          | synonymous SNV    | UNK:NM_001080419:exon8:c.C978T:p.D326D                                    | NA          | rs112695630 | NA |
| chr17 | 74288463 | 74288463 | G    | A      | exonic         | QRICH2       | nonsynonymous SNV | QRICH2:NM_032134:exon4:c.C1847T:p.A616V :OSM984645;OCCURENCE=1(endometr   | NA          | NA          | B  |
| chr17 | 75090386 | 75090386 | T    | C      | ncRNA_exonic   | LINC00338    | NA                | NA                                                                        | NA          | NA          | NA |
| chr17 | 75090396 | 75090396 | G    | A      | ncRNA_exonic   | LINC00338    | NA                | NA                                                                        | NA          | NA          | NA |
| chr17 | 75212385 | 75212385 | C    | T      | UTR3           | SEC14L1      | NA                | NA                                                                        | NA          | rs112436719 | NA |
| chr17 | 76083017 | 76083017 | A    | C      | exonic         | TNRC6C       | synonymous SNV    | 1142640:exon14:c.A3636C:p.P1212P,TNRC6C:NM_018996:exon14:c.A              | NA          | NA          | NA |
| chr17 | 76102335 | 76102335 | A    | -      | UTR3           | TNRC6C       | NA                | NA                                                                        | NA          | rs58424290  | NA |
| chr17 | 76421443 | 76421443 | G    | A      | exonic         | DNAH17       | synonymous SNV    | DNAH17:NM_173628:exon80:c.C13125T:p.Y4375Y                                | NA          | rs1134541   | NA |
| chr17 | 76798445 | 76798445 | C    | A      | exonic         | USP36        | nonsynonymous SNV | USP36:NM_025090:exon17:c.G2983T:p.A995S                                   | NA          | rs145562419 | B  |
| chr17 | 77709339 | 77709339 | C    | G      | exonic         | ENPP7        | synonymous SNV    | ENPP7:NM_178543:exon3:c.C897G:p.A299A                                     | NA          | rs11657217  | NA |
| chr17 | 77756156 | 77756156 | A    | C      | UTR3           | CBX2         | NA                | NA                                                                        | NA          | NA          | NA |
| chr17 | 77807715 | 77807715 | G    | T      | UTR3           | CBX4         | NA                | NA                                                                        | NA          | NA          | NA |
| chr17 | 78326266 | 78326266 | T    | G      | ncRNA_exonic   | LOC100294362 | NA                | NA                                                                        | NA          | NA          | NA |
| chr17 | 78326270 | 78326270 | A    | G      | ncRNA_exonic   | LOC100294362 | NA                | NA                                                                        | NA          | NA          | NA |
| chr17 | 78440927 | 78440927 | T    | -      | UTR3           | NPTX1        | NA                | NA                                                                        | NA          | NA          | NA |
| chr17 | 79090262 | 79090262 | -    | GCCCCA | UTR3           | BAIAP2       | NA                | NA                                                                        | NA          | rs148172788 | NA |
| chr17 | 79220020 | 79220020 | A    | C      | exonic         | SLC38A10     | nonsynonymous SNV | SLC38A10:NM_001037984:exon16:c.T2696G:p.V899G                             | NA          | NA          | P  |
| chr17 | 79419025 | 79419025 | G    | A      | exonic         | BAHCC1       | unknown           | UNKNOWN                                                                   | NA          | rs35572189  | NA |
| chr17 | 79517455 | 79517455 | A    | C      | exonic         | C17orf70     | synonymous SNV    | C17orf70:NM_025161:exon3:c.T1065G:p.G355G ID=COSM309626;OCCURENCE=1(lung) | NA          | rs202147413 | NA |
| chr17 | 79615572 | 79615572 | A    | G      | UTR3           | TSPAN10      | NA                | NA                                                                        | NA          | rs7405453   | NA |
| chr17 | 80332251 | 80332251 | T    | C      | exonic         | UTS2R        | synonymous SNV    | UTS2R:NM_018949:exon1:c.T51C:p.T17T                                       | NA          | rs11654140  | NA |
| chr17 | 80561596 | 80561598 | TTT  | -      | UTR3           | FOXK2        | NA                | NA                                                                        | NA          | NA          | NA |
| chr17 | 81176848 | 81176848 | G    | A      | ncRNA_exonic   | FLJ43681     | NA                | NA                                                                        | NA          | rs71271552  | NA |
| chr17 | 81177608 | 81177608 | C    | T      | ncRNA_exonic   | FLJ43681     | NA                | NA                                                                        | NA          | rs17143775  | NA |
| chr18 | 319513   | 319513   | A    | -      | UTR3           | COLEC12      | NA                | NA                                                                        | NA          | rs11336256  | NA |
| chr18 | 911381   | 911381   | A    | T      | UTR3           | ADCYAP1      | NA                | NA                                                                        | NA          | rs68021456  | NA |
| chr18 | 8387195  | 8387195  | G    | A      | exonic         | PTPRM        | synonymous SNV    | 2845:exon29:c.G4131A:p.E1377E,PTPRM:NM_001105244:exon31:c.G4              | NA          | rs593978    | NA |
| chr18 | 8639145  | 8639145  | C    | T      | UTR3           | RAB12        | NA                | NA                                                                        | NA          | rs200644771 | NA |
| chr18 | 9285128  | 9285128  | G    | A      | UTR3           | ANKRD12      | NA                | NA                                                                        | NA          | rs149646961 | NA |
| chr18 | 9861101  | 9861101  | A    | -      | UTR3           | RAB31        | NA                | NA                                                                        | NA          | NA          | NA |
| chr18 | 9887252  | 9887252  | C    | A      | exonic         | TXNDC2       | nonsynonymous SNV | _001098529:exon2:c.C776A:p.A259E,TXNDC2:NM_032243:exon2:c.C5              | NA          | NA          | NA |
| chr18 | 9887256  | 9887256  | G    | A      | exonic         | TXNDC2       | synonymous SNV    | _001098529:exon2:c.G780A:p.K260K,TXNDC2:NM_032243:exon2:c.G5              | NA          | NA          | NA |
| chr18 | 9887388  | 9887388  | G    | A      | exonic         | TXNDC2       | synonymous SNV    | _001098529:exon2:c.G912A:p.E304E,TXNDC2:NM_032243:exon2:c.G7              | NA          | rs1784553   | NA |
| chr18 | 12991393 | 12991393 | T    | C      | UTR5           | CEP192       | NA                | NA                                                                        | NA          | rs11663049  | NA |
| chr18 | 13612545 | 13612545 | C    | -      | UTR5           | LDLRAD4      | NA                | NA                                                                        | NA          | rs11311417  | NA |
| chr18 | 13665381 | 13665384 | AAAA | -      | UTR3           | FAM210A      | NA                | NA                                                                        | NA          | rs56656145  | NA |
| chr18 | 18530330 | 18530330 | T    | G      | UTR3           | ROCK1        | NA                | NA                                                                        | NA          | rs200562208 | NA |
| chr18 | 18534948 | 18534948 | G    | C      | exonic         | ROCK1        | nonsynonymous SNV | ROCK1:NM_005406:exon31:c.C3649G:p.Q1217E =COSM1130086;OCCURENCE=1(prostat | rs201390233 | B           | NA |
| chr18 | 24492378 | 24492378 | G    | C      | ncRNA_intronic | AQP4-AS1     | NA                | NA                                                                        | NA          | rs56343734  | NA |
| chr18 | 31322986 | 31322986 | G    | A      | exonic         | ASXL3        | synonymous SNV    | ASXL3:NM_030632:exon12:c.G3174A:p.K1058K                                  | NA          | NA          | NA |
| chr18 | 42644796 | 42644796 | C    | A      | UTR3           | SETBP1       | NA                | NA                                                                        | NA          | NA          | NA |
| chr18 | 45363933 | 45363933 | A    | -      | UTR3           | SMAD2        | NA                | NA                                                                        | NA          | NA          | NA |
| chr18 | 47349287 | 47349287 | T    | A      | UTR3           | MYO5B        | NA                | NA                                                                        | NA          | NA          | NA |
| chr18 | 47349335 | 47349335 | G    | A      | UTR3           | MYO5B        | NA                | NA                                                                        | NA          | rs199813194 | NA |
| chr18 | 47349337 | 47349337 | A    | G      | UTR3           | MYO5B        | NA                | NA                                                                        | NA          | NA          | NA |
| chr18 | 47349344 | 47349344 | C    | G      | UTR3           | MYO5B        | NA                | NA                                                                        | NA          | NA          | NA |
| chr18 | 47349346 | 47349346 | T    | C      | UTR3           | MYO5B        | NA                | NA                                                                        | NA          | NA          | NA |
| chr18 | 47349368 | 47349368 | A    | G      | UTR3           | MYO5B        | NA                | NA                                                                        | NA          | NA          | NA |

|       |          |          |           |    |              |           |                   |                                                                                              |                                  |             |    |
|-------|----------|----------|-----------|----|--------------|-----------|-------------------|----------------------------------------------------------------------------------------------|----------------------------------|-------------|----|
| chr18 | 47349398 | 47349398 | T         | G  | UTR3         | MYO5B     | NA                | NA                                                                                           | NA                               | NA          | NA |
| chr18 | 47349401 | 47349401 | T         | C  | UTR3         | MYO5B     | NA                | NA                                                                                           | NA                               | NA          | NA |
| chr18 | 47350146 | 47350146 | T         | C  | UTR3         | MYO5B     | NA                | NA                                                                                           | NA                               | NA          | NA |
| chr18 | 47350148 | 47350148 | A         | G  | UTR3         | MYO5B     | NA                | NA                                                                                           | NA                               | NA          | NA |
| chr18 | 47350224 | 47350224 | -         | G  | UTR3         | MYO5B     | NA                | NA                                                                                           | NA                               | NA          | NA |
| chr18 | 48610376 | 48610376 | G         | A  | UTR3         | SMAD4     | NA                | NA                                                                                           | NA                               | NA          | NA |
| chr18 | 55215503 | 55215503 | C         | A  | UTR3         | FECH      | NA                | NA                                                                                           | NA                               | NA          | NA |
| chr18 | 55289076 | 55289076 | C         | T  | UTR5         | NARS      | NA                | NA                                                                                           | NA                               | rs2032938   | NA |
| chr18 | 56985789 | 56985789 | T         | C  | UTR5         | CPLX4     | NA                | NA                                                                                           | NA                               | rs59444152  | NA |
| chr18 | 61265349 | 61265349 | T         | -  | UTR3         | SERPINB13 | NA                | NA                                                                                           | NA                               | rs57085048  | NA |
| chr18 | 61325815 | 61325815 | A         | G  | exonic       | SERPINB3  | nonsynonymous SNV | SERPINB3:NM_006919:exon5:c.T401C:p.V134A                                                     | NA                               | rs148254791 | B  |
| chr18 | 61325816 | 61325816 | C         | T  | exonic       | SERPINB3  | nonsynonymous SNV | SERPINB3:NM_006919:exon5:c.G400A:p.V134I                                                     | NA                               | rs61754491  | B  |
| chr18 | 64171528 | 64171528 | -         | TT | UTR3         | CDH19     | NA                | NA                                                                                           | NA                               | NA          | NA |
| chr18 | 64171913 | 64171913 | A         | T  | UTR3         | CDH19     | NA                | NA                                                                                           | NA                               | NA          | NA |
| chr18 | 72516258 | 72516258 | -         | A  | UTR3         | ZNF407    | NA                | NA                                                                                           | NA                               | NA          | NA |
| chr18 | 72593013 | 72593013 | A         | C  | exonic       | ZNF407    | nonsynonymous SNV | 1146189:exon5:c.A5066C;p.D1689A,ZNF407:NM_017757:exon5:c.A5066C;p.D1689A                     | NA                               | NA          | NA |
| chr19 | 111016   | 111016   | T         | G  | exonic       | OR4F17    | nonsynonymous SNV | OR4F17:NM_001005240:exon1:c.T338G:p.F113C                                                    | NA                               | rs200336441 | D  |
| chr19 | 199295   | 199295   | G         | A  | ncRNA_exonic | FLJ45445  | NA                | NA                                                                                           | NA                               | NA          | NA |
| chr19 | 199442   | 199442   | G         | T  | ncRNA_exonic | FLJ45445  | NA                | NA                                                                                           | NA                               | rs57399907  | NA |
| chr19 | 199588   | 199588   | T         | G  | ncRNA_exonic | FLJ45445  | NA                | NA                                                                                           | NA                               | rs8053947   | NA |
| chr19 | 501695   | 501695   | C         | T  | exonic       | MADCAM1   | nonsynonymous SNV | MADCAM1:NM_130760:exon4:c.C694T:p.P232S                                                      | NA                               | rs77685069  | NA |
| chr19 | 501725   | 501725   | G         | A  | exonic       | MADCAM1   | nonsynonymous SNV | MADCAM1:NM_130760:exon4:c.G724A:p.D242N                                                      | NA                               | rs62130833  | NA |
| chr19 | 501762   | 501762   | A         | C  | exonic       | MADCAM1   | nonsynonymous SNV | MADCAM1:NM_130760:exon4:c.A761C:p.Q254P                                                      | D=COSM475040;OCCURENCE=1(kidney) | rs200007467 | NA |
| chr19 | 622336   | 622336   | T         | G  | exonic       | POLRMT    | nonsynonymous SNV | POLRMT:NM_005035:exon9:c.A1664C:p.E555A                                                      | NA                               | rs2238549   | B  |
| chr19 | 624882   | 624882   | T         | C  | exonic       | POLRMT    | nonsynonymous SNV | POLRMT:NM_005035:exon5:c.A977G:p.E326G                                                       | NA                               | NA          | P  |
| chr19 | 871987   | 871987   | G         | A  | exonic       | MED16     | synonymous SNV    | MED16:NM_005481:exon12:c.C2037T:p.T679T                                                      | NA                               | rs78047294  | NA |
| chr19 | 1037971  | 1037971  | -         | T  | UTR3         | CNN2      | NA                | NA                                                                                           | NA                               | NA          | NA |
| chr19 | 1472591  | 1472591  | T         | C  | UTR3         | APC2      | NA                | NA                                                                                           | NA                               | NA          | NA |
| chr19 | 1525392  | 1525392  | C         | T  | UTR5         | PLK5      | NA                | NA                                                                                           | NA                               | rs2292451   | NA |
| chr19 | 1597572  | 1597572  | G         | T  | UTR3         | UQCR11    | NA                | NA                                                                                           | NA                               | NA          | NA |
| chr19 | 1925930  | 1925930  | G         | C  | UTR3         | SCAMP4    | NA                | NA                                                                                           | NA                               | NA          | NA |
| chr19 | 2290870  | 2290870  | G         | C  | exonic       | LINGO3    | synonymous SNV    | LINGO3:NM_001101391:exon2:c.C906G:p.A302A                                                    | NA                               | rs8111892   | NA |
| chr19 | 2716453  | 2716453  | T         | G  | UTR3         | DIRAS1    | NA                | NA                                                                                           | NA                               | NA          | NA |
| chr19 | 3121452  | 3121452  | -         | A  | UTR3         | GNA11     | NA                | NA                                                                                           | NA                               | NA          | NA |
| chr19 | 3590837  | 3590837  | T         | A  | UTR3         | GIPC3     | NA                | NA                                                                                           | NA                               | NA          | NA |
| chr19 | 3769253  | 3769253  | G         | C  | UTR3         | RAX2      | NA                | NA                                                                                           | NA                               | rs6510769   | NA |
| chr19 | 4511737  | 4511737  | T         | C  | exonic       | PLIN4     | synonymous SNV    | PLIN4:NM_001080400:exon3:c.A2193G:p.K731K                                                    | NA                               | rs57610751  | NA |
| chr19 | 4512676  | 4512676  | T         | G  | exonic       | PLIN4     | synonymous SNV    | PLIN4:NM_001080400:exon3:c.A1254C:p.T418T                                                    | NA                               | rs59593546  | NA |
| chr19 | 4513044  | 4513044  | C         | T  | exonic       | PLIN4     | nonsynonymous SNV | PLIN4:NM_001080400:exon3:c.G886A:p.G296S                                                     | NA                               | rs56366613  | NA |
| chr19 | 4513045  | 4513045  | A         | G  | exonic       | PLIN4     | synonymous SNV    | PLIN4:NM_001080400:exon3:c.T885C:p.T295T                                                     | NA                               | rs12327614  | NA |
| chr19 | 4523091  | 4523091  | T         | -  | UTR3         | PLIN5     | NA                | NA                                                                                           | NA                               | rs71168910  | NA |
| chr19 | 4524016  | 4524016  | G         | A  | exonic       | PLIN5     | nonsynonymous SNV | PLIN5:NM_001013706:exon8:c.C916T:p.R306W                                                     | NA                               | rs1062223   | D  |
| chr19 | 5915980  | 5915980  | T         | G  | UTR3         | CAPS      | NA                | NA                                                                                           | NA                               | NA          | NA |
| chr19 | 6156483  | 6156483  | T         | C  | exonic       | ACSBG2    | nonsynonymous SNV | ACSBG2:NM_030924:exon5:c.T428C:p.V143A                                                       | NA                               | rs4807840   | B  |
| chr19 | 7166376  | 7166376  | C         | T  | exonic       | INSR      | synonymous SNV    | 00208:exon8:c.G1650A:p.A550A,INSR:NM_001079817:exon8:c.G1650=COSM148469;OCCURENCE=1(stomach) | rs2059806                        | NA          | NA |
| chr19 | 7536496  | 7536496  | T         | C  | UTR3         | ARHGEF18  | NA                | NA                                                                                           | NA                               | NA          | NA |
| chr19 | 7744076  | 7744077  | CC        | -  | UTR3         | C19orf59  | NA                | NA                                                                                           | NA                               | rs149073960 | NA |
| chr19 | 7965897  | 7965897  | C         | G  | UTR3         | LRRRC8E   | NA                | NA                                                                                           | NA                               | NA          | NA |
| chr19 | 7965898  | 7965898  | A         | G  | UTR3         | LRRRC8E   | NA                | NA                                                                                           | NA                               | NA          | NA |
| chr19 | 8176640  | 8176640  | C         | T  | exonic       | FBN3      | nonsynonymous SNV | FBN3:NM_032447:exon31:c.G3976A:p.V1326I                                                      | NA                               | rs12975322  | B  |
| chr19 | 9297874  | 9297874  | G         | A  | UTR3         | OR7D2     | NA                | NA                                                                                           | NA                               | rs7246654   | NA |
| chr19 | 9761701  | 9761701  | C         | T  | UTR3         | ZNF562    | NA                | NA                                                                                           | NA                               | NA          | NA |
| chr19 | 10439540 | 10439540 | A         | G  | exonic       | RAVER1    | synonymous SNV    | RAVER1:NM_133452:exon3:c.T585C:p.A195A                                                       | NA                               | rs3745262   | NA |
| chr19 | 10579172 | 10579172 | G         | C  | UTR3         | PDE4A     | NA                | NA                                                                                           | NA                               | NA          | NA |
| chr19 | 10579177 | 10579177 | A         | C  | UTR3         | PDE4A     | NA                | NA                                                                                           | NA                               | NA          | NA |
| chr19 | 11562297 | 11562297 | C         | T  | UTR3         | ELAVL3    | NA                | NA                                                                                           | NA                               | NA          | NA |
| chr19 | 11563263 | 11563263 | G         | A  | UTR3         | ELAVL3    | NA                | NA                                                                                           | NA                               | NA          | NA |
| chr19 | 11564612 | 11564612 | G         | C  | UTR3         | ELAVL3    | NA                | NA                                                                                           | NA                               | NA          | NA |
| chr19 | 12428367 | 12428367 | T         | C  | UTR3         | ZNF563    | NA                | NA                                                                                           | NA                               | rs10410020  | NA |
| chr19 | 12574741 | 12574742 | AA        | -  | UTR3         | ZNF709    | NA                | NA                                                                                           | NA                               | NA          | NA |
| chr19 | 12575260 | 12575260 | C         | T  | exonic       | ZNF709    | synonymous SNV    | ZNF709:NM_152601:exon4:c.G1476A:p.R492R                                                      | NA                               | NA          | NA |
| chr19 | 12810471 | 12810471 | T         | -  | UTR3         | TNPO2     | NA                | NA                                                                                           | NA                               | NA          | NA |
| chr19 | 13317759 | 13317767 | TTTTTTTTT | -  | UTR3         | CACNA1A   | NA                | NA                                                                                           | NA                               | NA          | NA |
| chr19 | 14582539 | 14582539 | C         | T  | exonic       | PKN1      | synonymous SNV    | 002741:exon22:c.C2772T:p.L924L,PKN1:NM_213560:exon22:c.C279C                                 | NA                               | rs8598      | NA |
| chr19 | 14583582 | 14583582 | C         | T  | exonic       | PTGER1    | synonymous SNV    | PTGER1:NM_000955:exon3:c.G999A:p.L333L                                                       | NA                               | rs11668633  | NA |
| chr19 | 15770784 | 15770784 | G         | A  | UTR3         | CYP4F3    | NA                | NA                                                                                           | NA                               | rs3087897   | NA |

|       |          |          |           |          |              |          |                   |                                                               |    |           |             |    |
|-------|----------|----------|-----------|----------|--------------|----------|-------------------|---------------------------------------------------------------|----|-----------|-------------|----|
| chr19 | 17001071 | 17001071 | C         | A        | exonic       | F2RL3    | nonsynonymous SNV | F2RL3:NM_003950:exon2:c.C797A:p.A266D                         | NA | NA        | D           |    |
| chr19 | 17038890 | 17038890 | C         | A        | exonic       | CPAMD8   | nonsynonymous SNV | CPAMD8:NM_015692:exon25:c.G3440T:p.S1147I                     | NA | NA        | NA          |    |
| chr19 | 17392483 | 17392483 | C         | G        | UTR5         | ANKLE1   | NA                | NA                                                            | NA | rs7246262 | NA          |    |
| chr19 | 17393015 | 17393015 | C         | T        | exonic       | ANKLE1   | nonsynonymous SNV | ANKLE1:NM_152363:exon2:c.C212T:p.A71V                         | NA | NA        | rs1864116   | NA |
| chr19 | 17434197 | 17434197 | C         | A        | UTR3         | ANO8     | NA                | NA                                                            | NA | NA        | NA          | NA |
| chr19 | 18260796 | 18260796 | T         | -        | UTR3         | MAST3    | NA                | NA                                                            | NA | NA        | rs61501122  | NA |
| chr19 | 18474961 | 18474961 | C         | T        | UTR3         | PGPEP1   | NA                | NA                                                            | NA | NA        | NA          | NA |
| chr19 | 18479249 | 18479251 | AAA       | -        | UTR3         | PGPEP1   | NA                | NA                                                            | NA | NA        | rs59054174  | NA |
| chr19 | 20004073 | 20004109 | ACAAGTTC  | -        | UTR3         | ZNF253   | NA                | NA                                                            | NA | NA        | NA          | NA |
| chr19 | 20046147 | 20046147 | G         | A        | UTR3         | ZNF93    | NA                | NA                                                            | NA | NA        | rs1048421   | NA |
| chr19 | 20803578 | 20803578 | A         | G        | UTR3         | ZNF626   | NA                | NA                                                            | NA | NA        | rs7250542   | NA |
| chr19 | 20803652 | 20803652 | -         | T        | UTR3         | ZNF626   | NA                | NA                                                            | NA | NA        | rs139108386 | NA |
| chr19 | 20804513 | 20804513 | G         | A        | UTR3         | ZNF626   | NA                | NA                                                            | NA | NA        | rs4485501   | NA |
| chr19 | 20806673 | 20806673 | C         | T        | UTR3         | ZNF626   | NA                | NA                                                            | NA | NA        | NA          | NA |
| chr19 | 20807270 | 20807270 | A         | G        | exonic       | ZNF626   | synonymous SNV    | ZNF626:NM_001076675:exon4:c.T1413C:p.H471H                    | NA | NA        | rs4809070   | NA |
| chr19 | 21566239 | 21566239 | T         | C        | ncRNA_exonic | ZNF738   | NA                | NA                                                            | NA | NA        | NA          | NA |
| chr19 | 21566240 | 21566240 | A         | T        | ncRNA_exonic | ZNF738   | NA                | NA                                                            | NA | NA        | NA          | NA |
| chr19 | 21566247 | 21566247 | C         | T        | ncRNA_exonic | ZNF738   | NA                | NA                                                            | NA | NA        | NA          | NA |
| chr19 | 22363610 | 22363610 | A         | G        | exonic       | ZNF676   | synonymous SNV    | ZNF676:NM_001001411:exon3:c.T909C:p.H303H                     | NA | NA        | rs201622264 | NA |
| chr19 | 22363795 | 22363795 | T         | C        | exonic       | ZNF676   | nonsynonymous SNV | ZNF676:NM_001001411:exon3:c.A724G:p.K242E                     | NA | NA        | NA          | B  |
| chr19 | 22363796 | 22363796 | A         | C        | exonic       | ZNF676   | synonymous SNV    | ZNF676:NM_001001411:exon3:c.T723G:p.T241T                     | NA | NA        | NA          | NA |
| chr19 | 22363797 | 22363797 | G         | A        | exonic       | ZNF676   | nonsynonymous SNV | ZNF676:NM_001001411:exon3:c.C722T:p.T241I                     | NA | NA        | NA          | B  |
| chr19 | 22363803 | 22363803 | A         | T        | exonic       | ZNF676   | nonsynonymous SNV | ZNF676:NM_001001411:exon3:c.T716A:p.I239N                     | NA | NA        | NA          | B  |
| chr19 | 22363817 | 22363817 | A         | G        | exonic       | ZNF676   | synonymous SNV    | ZNF676:NM_001001411:exon3:c.T702C:p.F234F                     | NA | NA        | NA          | NA |
| chr19 | 33698660 | 33698660 | G         | C        | UTR3         | LRP3     | NA                | NA                                                            | NA | NA        | NA          | NA |
| chr19 | 35454604 | 35454604 | A         | C        | UTR5         | ZNF792   | NA                | NA                                                            | NA | NA        | rs2546028   | NA |
| chr19 | 35454605 | 35454605 | A         | G        | UTR5         | ZNF792   | NA                | NA                                                            | NA | NA        | rs2546029   | NA |
| chr19 | 35850711 | 35850711 | A         | G        | exonic       | FFAR3    | nonsynonymous SNV | FFAR3:NM_005304:exon2:c.A919G:p.M307V                         | NA | NA        | rs12459836  | B  |
| chr19 | 35851239 | 35851239 | G         | A        | UTR3         | FFAR3    | NA                | NA                                                            | NA | NA        | rs147842512 | NA |
| chr19 | 36114999 | 36114999 | C         | T        | UTR3         | HAUS5    | NA                | NA                                                            | NA | NA        | NA          | NA |
| chr19 | 36135645 | 36135645 | T         | A        | exonic       | ETV2     | nonsynonymous SNV | ETV2:NM_014209:exon7:c.T920A:p.I307N                          | NA | NA        | NA          | NA |
| chr19 | 36135646 | 36135646 | C         | G        | exonic       | ETV2     | nonsynonymous SNV | ETV2:NM_014209:exon7:c.C921G:p.I307M                          | NA | NA        | NA          | NA |
| chr19 | 36135647 | 36135647 | G         | A        | exonic       | ETV2     | nonsynonymous SNV | ETV2:NM_014209:exon7:c.G922A:p.V308M                          | NA | NA        | NA          | NA |
| chr19 | 36135649 | 36135649 | G         | C        | exonic       | ETV2     | synonymous SNV    | ETV2:NM_014209:exon7:c.G924C:p.V308V                          | NA | NA        | NA          | NA |
| chr19 | 36135650 | 36135650 | C         | G        | exonic       | ETV2     | nonsynonymous SNV | ETV2:NM_014209:exon7:c.C925G:p.R309G                          | NA | NA        | NA          | NA |
| chr19 | 37036967 | 37036967 | A         | G        | UTR3         | ZNF529   | NA                | NA                                                            | NA | NA        | NA          | NA |
| chr19 | 38028814 | 38028814 | T         | -        | UTR3         | ZNF793   | NA                | NA                                                            | NA | NA        | NA          | NA |
| chr19 | 38031187 | 38031187 | G         | A        | UTR3         | ZNF793   | NA                | NA                                                            | NA | NA        | NA          | NA |
| chr19 | 38795905 | 38795905 | C         | A        | UTR3         | YIF1B    | NA                | NA                                                            | NA | NA        | NA          | NA |
| chr19 | 38819463 | 38819463 | C         | G        | UTR3         | KCNK6    | NA                | NA                                                            | NA | NA        | rs61160177  | NA |
| chr19 | 39327296 | 39327296 | C         | A        | UTR3         | HNRNPUL1 | NA                | NA                                                            | NA | NA        | NA          | NA |
| chr19 | 39360720 | 39360720 | G         | A        | exonic       | RINL     | nonsynonymous SNV | _001195833:exon9:c.C1205T:p.P402L,RINL:NM_198445:exon9:c.C863 | NA | NA        | rs8110393   | D  |
| chr19 | 39805325 | 39805325 | T         | G        | exonic       | LRFN1    | nonsynonymous SNV | LRFN1:NM_020862:exon1:c.A652C:p.T218P                         | NA | NA        | NA          | NA |
| chr19 | 40021823 | 40021823 | -         | T        | UTR3         | EID2B    | NA                | NA                                                            | NA | NA        | NA          | NA |
| chr19 | 40399814 | 40399814 | A         | G        | exonic       | FCGBP    | nonsynonymous SNV | FCGBP:NM_003890:exon13:c.T5881C:p.S1961P                      | NA | NA        | NA          | NA |
| chr19 | 41128309 | 41128309 | C         | T        | exonic       | LTBP4    | unknown           | UNKNOWN                                                       | NA | NA        | rs10880     | NA |
| chr19 | 41349517 | 41349517 | G         | C        | UTR3         | CYP2A6   | NA                | NA                                                            | NA | NA        | rs113777046 | NA |
| chr19 | 41349519 | 41349519 | T         | A        | UTR3         | CYP2A6   | NA                | NA                                                            | NA | NA        | rs112026263 | NA |
| chr19 | 41456227 | 41456227 | T         | A        | ncRNA_exonic | CYP2B7P1 | NA                | NA                                                            | NA | NA        | rs117694034 | NA |
| chr19 | 41811707 | 41811707 | T         | C        | exonic       | HNRNPUL1 | nonsynonymous SNV | _007040:exon14:c.T2389C:p.Y797H,HNRNPUL1:NM_144732:exon14:c.  | NA | NA        | NA          | NA |
| chr19 | 42799199 | 42799199 | A         | C        | exonic       | CIC      | synonymous SNV    | CIC:NM_015125:exon20:c.A4683C:p.S1561S                        | NA | NA        | NA          | NA |
| chr19 | 43376101 | 43376101 | G         | T        | exonic       | PSG1     | nonsynonymous SNV | i27A:p.A176E,PSG1:NM_001184826:exon3:c.C527A:p.A176E,PSG1:NM  | NA | NA        | NA          | NA |
| chr19 | 43853608 | 43853608 | A         | G        | ncRNA_exonic | PRG1     | NA                | NA                                                            | NA | NA        | rs62113732  | NA |
| chr19 | 43864548 | 43864548 | C         | A        | exonic       | CD177    | unknown           | UNKNOWN                                                       | NA | NA        | rs10425835  | NA |
| chr19 | 44037370 | 44037370 | C         | G        | UTR5         | ZNF575   | NA                | NA                                                            | NA | NA        | rs2599459   | NA |
| chr19 | 44096007 | 44096007 | G         | A        | UTR3         | IRGQ     | NA                | NA                                                            | NA | NA        | rs28444861  | NA |
| chr19 | 44096007 | 44096007 | -         | AA       | UTR3         | IRGQ     | NA                | NA                                                            | NA | NA        | NA          | NA |
| chr19 | 44117603 | 44117603 | T         | A        | exonic       | SRRM5    | nonsynonymous SNV | SRRM5:NM_001145641:exon1:c.T1330A:p.Y444N                     | NA | NA        | rs201848853 | NA |
| chr19 | 44576302 | 44576302 | C         | T        | UTR5         | ZNF284   | NA                | NA                                                            | NA | NA        | rs11666432  | NA |
| chr19 | 45323171 | 45323187 | CCCAACTC/ | -        | UTR3         | BCAM     | NA                | NA                                                            | NA | NA        | rs3842409   | NA |
| chr19 | 46021198 | 46021198 | C         | A        | exonic       | VASP     | nonsynonymous SNV | VASP:NM_003370:exon3:c.C189A:p.N63K                           | NA | NA        | NA          | D  |
| chr19 | 46030154 | 46030154 | G         | A        | UTR3         | VASP     | NA                | NA                                                            | NA | NA        | rs10995     | NA |
| chr19 | 46049982 | 46049982 | A         | G        | UTR3         | OPA3     | NA                | NA                                                            | NA | NA        | rs10422253  | NA |
| chr19 | 46052048 | 46052048 | -         | TTATTTAT | UTR3         | OPA3     | NA                | NA                                                            | NA | NA        | NA          | NA |
| chr19 | 46133251 | 46133251 | C         | T        | exonic       | EML2     | synonymous SNV    | i.S188S,EML2:NM_001193268:exon10:c.G1167A:p.S389S,EML2:NM_00  | NA | NA        | rs7251952   | NA |
| chr19 | 46133256 | 46133256 | G         | A        | exonic       | EML2     | nonsynonymous SNV | o.L187F,EML2:NM_001193268:exon10:c.C1162T:p.L388F,EML2:NM_00  | NA | NA        | rs7252175   | D  |



|       |          |          |          |          |              |                      |                      |                                                                                              |                                 |             |    |
|-------|----------|----------|----------|----------|--------------|----------------------|----------------------|----------------------------------------------------------------------------------------------|---------------------------------|-------------|----|
| chr19 | 46273463 | 46273507 | AGCAGCA  | -        | UTR3         | DMPK                 | NA                   | NA                                                                                           | NA                              | NA          | NA |
| chr19 | 46286335 | 46286335 | T        | G        | UTR3         | DMWD                 | NA                   | NA                                                                                           | NA                              | NA          | NA |
| chr19 | 46442771 | 46442771 | G        | A        | UTR3         | NOVA2                | NA                   | NA                                                                                           | NA                              | NA          | NA |
| chr19 | 46823751 | 46823751 | C        | T        | exonic       | HIF3A                | synonymous SNV       | _152796:exon8:c.C870T;p.H290H,HIF3A:NM_152794:exon9:c.C1071T:                                | NA                              | rs3764610   | NA |
| chr19 | 46844456 | 46844456 | T        | -        | UTR3         | HIF3A                | NA                   | NA                                                                                           | NA                              | rs71769965  | NA |
| chr19 | 47113764 | 47113764 | G        | C        | UTR3         | CALM3                | NA                   | NA                                                                                           | NA                              | NA          | NA |
| chr19 | 47507174 | 47507175 | CG       | -        | UTR3         | ARHGAP35             | NA                   | NA                                                                                           | NA                              | NA          | NA |
| chr19 | 47774988 | 47775001 | CGCGCGCG | -        | UTR3         | CCDC9                | NA                   | NA                                                                                           | NA                              | NA          | NA |
| chr19 | 48183771 | 48183771 | C        | T        | exonic       | GLTSCR1              | synonymous SNV       | GLTSCR1:NM_015711:exon6:c.C1344T:p.S448S                                                     | NA                              | rs1035938   | NA |
| chr19 | 48984071 | 48984071 | C        | G        | UTR3         | CYTH2                | NA                   | NA                                                                                           | NA                              | NA          | NA |
| chr19 | 49891522 | 49891522 | A        | G        | UTR5         | CCDC155              | NA                   | NA                                                                                           | NA                              | rs9304684   | NA |
| chr19 | 52273531 | 52273531 | G        | A        | UTR3         | FPR2                 | NA                   | NA                                                                                           | NA                              | NA          | NA |
| chr19 | 52495250 | 52495250 | A        | G        | UTR3         | ZNF615               | NA                   | NA                                                                                           | NA                              | rs188828596 | NA |
| chr19 | 52723101 | 52723101 | T        | C        | exonic       | PPP2R1A              | nonsynonymous SNV    | PPP2R1A:NM_014225:exon10:c.T1286C:p.L429P                                                    | NA                              | NA          | B  |
| chr19 | 53381523 | 53381523 | G        | A        | UTR3         | ZNF320               | NA                   | NA                                                                                           | NA                              | rs12978427  | NA |
| chr19 | 53431263 | 53431263 | C        | T        | ncRNA_exonic | ZNF321P              | NA                   | NA                                                                                           | NA                              | rs7250706   | NA |
| chr19 | 53946857 | 53946857 | C        | G        | ncRNA_exonic | TPM3P9               | NA                   | NA                                                                                           | NA                              | rs75274020  | NA |
| chr19 | 54378026 | 54378027 | TT       | -        | UTR3         | MYADM                | NA                   | NA                                                                                           | NA                              | NA          | NA |
| chr19 | 54378031 | 54378031 | T        | C        | UTR3         | MYADM                | NA                   | NA                                                                                           | NA                              | NA          | NA |
| chr19 | 54725798 | 54725798 | G        | T        | exonic       | LILRB3               | nonsynonymous SNV    | _001081450:exon4:c.C560A:p.T187N,LILRB3:NM_006864:exon4:c.C56=COSM1158374;OCCURENCE=1(pancre | rs1052968                       | B           | NA |
| chr19 | 54725835 | 54725835 | G        | C        | exonic       | LILRB3               | nonsynonymous SNV    | _001081450:exon4:c.C523G:p.R175G,LILRB3:NM_006864:exon4:c.C52                                | NA                              | rs201948566 | B  |
| chr19 | 54742303 | 54742303 | C        | T        | UTR3         | LILRA6               | NA                   | NA                                                                                           | NA                              | rs71365449  | NA |
| chr19 | 54744732 | 54744732 | G        | A        | exonic       | LILRA6               | synonymous SNV       | LILRA6:NM_024318:exon5:c.C930T:p.S310S                                                       | NA                              | rs79245076  | NA |
| chr19 | 54818552 | 54818552 | G        | -        | UTR3         | LILRA5               | NA                   | NA                                                                                           | NA                              | NA          | NA |
| chr19 | 54818578 | 54818578 | G        | A        | UTR3         | LILRA5               | NA                   | NA                                                                                           | NA                              | NA          | NA |
| chr19 | 55255290 | 55255290 | C        | T        | exonic       | KIR2DL3              | synonymous SNV       | KIR2DL3:NM_015868:exon4:c.C418T:p.L140L                                                      | NA                              | rs662465    | NA |
| chr19 | 55255377 | 55255377 | C        | T        | exonic       | KIR2DL3              | nonsynonymous SNV    | KIR2DL3:NM_015868:exon4:c.C505T:p.R169C                                                      | ID=COSM321260;OCCURENCE=1(lung) | rs200686594 | NA |
| chr19 | 55255534 | 55255534 | C        | T        | exonic       | KIR2DL3              | nonsynonymous SNV    | KIR2DL3:NM_015868:exon4:c.C662T:p.T221I                                                      | NA                              | rs150145497 | NA |
| chr19 | 55286864 | 55286864 | A        | C        | exonic       | KIR2DL1              | synonymous SNV       | KIR2DL1:NM_014218:exon4:c.A618C:p.P206P                                                      | NA                              | rs201422291 | NA |
| chr19 | 55324674 | 55324674 | -        | A        | exonic       | KIR2DL4,LOC100287534 | frameshift insertion | KIR2DL4:NM_001080772:exon6:c.801_802insA:p.S267fs                                            | NA                              | rs11371265  | NA |
| chr19 | 55328993 | 55328993 | G        | C        | exonic       | KIR3DL1              | nonsynonymous SNV    | KIR3DL1:NM_013289:exon2:c.G39C:p.L13F                                                        | NA                              | rs1142881   | NA |
| chr19 | 55329021 | 55329021 | A        | G        | exonic       | KIR3DL1              | nonsynonymous SNV    | KIR3DL1:NM_013289:exon2:c.A67G:p.M23V                                                        | NA                              | rs1142882   | NA |
| chr19 | 55358734 | 55358734 | G        | A        | exonic       | KIR2DS4              | unknown              | UNKNOWN                                                                                      | NA                              | rs150361840 | NA |
| chr19 | 55359234 | 55359234 | A        | G        | exonic       | KIR2DS4              | unknown              | UNKNOWN                                                                                      | NA                              | rs113921547 | NA |
| chr19 | 55360023 | 55360023 | G        | C        | UTR3         | KIR2DS4              | NA                   | NA                                                                                           | NA                              | NA          | NA |
| chr19 | 55607307 | 55607307 | T        | G        | exonic       | PPP1R12C             | nonsynonymous SNV    | 001271618:exon9:c.A1155C;p.E385D,PPP1R12C:NM_017607:exon9:c./                                | NA                              | NA          | P  |
| chr19 | 55861504 | 55861504 | T        | A        | UTR3         | COX6B2               | NA                   | NA                                                                                           | NA                              | rs56986472  | NA |
| chr19 | 55866173 | 55866173 | C        | A        | UTR5         | COX6B2               | NA                   | NA                                                                                           | NA                              | NA          | NA |
| chr19 | 55876654 | 55876654 | G        | C        | UTR3         | IL11                 | NA                   | NA                                                                                           | NA                              | rs4252561   | NA |
| chr19 | 55941938 | 55941938 | A        | G        | UTR3         | SHISA7               | NA                   | NA                                                                                           | NA                              | NA          | NA |
| chr19 | 56274453 | 56274453 | G        | A        | exonic       | RFPL4A               | nonsynonymous SNV    | RFPL4A:NM_001145014:exon3:c.G776A:p.G259E                                                    | =COSM148754;OCCURENCE=1(stomac  | rs12463244  | NA |
| chr19 | 56652592 | 56652592 | G        | A        | UTR5         | ZNF444               | NA                   | NA                                                                                           | NA                              | rs3745836   | NA |
| chr19 | 56889273 | 56889273 | -        | AGTCCTTT | ncRNA_exonic | ZNF542               | NA                   | NA                                                                                           | NA                              | rs11280846  | NA |
| chr19 | 57732640 | 57732640 | A        | C        | UTR3         | ZNF264               | NA                   | NA                                                                                           | NA                              | NA          | NA |
| chr19 | 58383178 | 58383178 | A        | -        | UTR3         | ZNF814               | NA                   | NA                                                                                           | NA                              | NA          | NA |
| chr19 | 58386285 | 58386285 | G        | A        | exonic       | ZNF814               | nonsynonymous SNV    | ZNF814:NM_001144989:exon3:c.C473T:p.A158V                                                    | NA                              | rs2375155   | NA |
| chr19 | 58963018 | 58963018 | C        | G        | UTR5         | ZNF324B              | NA                   | NA                                                                                           | NA                              | rs893187    | NA |
| chr20 | 309179   | 309179   | T        | A        | UTR3         | SOX12                | NA                   | NA                                                                                           | NA                              | NA          | NA |
| chr20 | 309180   | 309180   | T        | A        | UTR3         | SOX12                | NA                   | NA                                                                                           | NA                              | NA          | NA |
| chr20 | 309181   | 309181   | T        | G        | UTR3         | SOX12                | NA                   | NA                                                                                           | NA                              | NA          | NA |
| chr20 | 628742   | 628742   | G        | A        | UTR3         | SRXN1                | NA                   | NA                                                                                           | NA                              | rs41282132  | NA |
| chr20 | 1895794  | 1895794  | G        | A        | exonic       | SIRPA                | synonymous SNV       | i129A;p.V43V,SIRPA:NM_001040022:exon3:c.G129A;p.V43V,SIRPA:NM                                | NA                              | rs1135192   | NA |
| chr20 | 1895796  | 1895796  | T        | C        | exonic       | SIRPA                | nonsynonymous SNV    | .T131C;p.L44S,SIRPA:NM_001040022:exon3:c.T131C;p.L44S,SIRPA:NM                               | NA                              | rs143735290 | B  |
| chr20 | 1895813  | 1895813  | A        | T        | exonic       | SIRPA                | nonsynonymous SNV    | A148T;p.T50S,SIRPA:NM_001040022:exon3:c.A148T;p.T50S,SIRPA:NM                                | NA                              | rs17855609  | B  |
| chr20 | 1895815  | 1895815  | A        | G        | exonic       | SIRPA                | synonymous SNV       | \150G;p.T50T,SIRPA:NM_001040022:exon3:c.A150G;p.T50T,SIRPA:NM                                | NA                              | rs17853846  | NA |
| chr20 | 3856254  | 3856254  | C        | G        | UTR3         | MAVS                 | NA                   | NA                                                                                           | NA                              | NA          | NA |
| chr20 | 4706509  | 4706510  | TT       | -        | UTR3         | PRND                 | NA                   | NA                                                                                           | NA                              | NA          | NA |
| chr20 | 4706782  | 4706782  | -        | TTTTTT   | UTR3         | PRND                 | NA                   | NA                                                                                           | NA                              | NA          | NA |
| chr20 | 5454959  | 5454959  | G        | A        | ncRNA_exonic | LOC643406            | NA                   | NA                                                                                           | NA                              | rs501565    | NA |
| chr20 | 5456942  | 5456942  | A        | T        | ncRNA_exonic | LOC643406            | NA                   | NA                                                                                           | NA                              | rs113222187 | NA |
| chr20 | 17971045 | 17971045 | A        | G        | UTR3         | MGME1                | NA                   | NA                                                                                           | NA                              | NA          | NA |
| chr20 | 19982007 | 19982010 | TTTT     | -        | UTR3         | RIN2                 | NA                   | NA                                                                                           | NA                              | NA          | NA |
| chr20 | 25262727 | 25262727 | A        | C        | exonic       | PYGB                 | nonsynonymous SNV    | PYGB:NM_002862:exon12:c.A1462C:p.T488P                                                       | NA                              | NA          | D  |
| chr20 | 25595952 | 25595952 | A        | -        | UTR3         | NANP                 | NA                   | NA                                                                                           | NA                              | NA          | NA |
| chr20 | 25753637 | 25753637 | C        | G        | ncRNA_exonic | FAM182B              | NA                   | NA                                                                                           | NA                              | rs75733040  | NA |
| chr20 | 25753646 | 25753646 | G        | C        | ncRNA_exonic | FAM182B              | NA                   | NA                                                                                           | NA                              | rs78538493  | NA |

|       |          |          |    |      |              |               |                         |                                                                                              |                                 |             |    |
|-------|----------|----------|----|------|--------------|---------------|-------------------------|----------------------------------------------------------------------------------------------|---------------------------------|-------------|----|
| chr20 | 25753853 | 25753853 | A  | G    | ncRNA_exonic | FAM182B       | NA                      | NA                                                                                           | NA                              | rs76897919  | NA |
| chr20 | 25754607 | 25754607 | C  | A    | ncRNA_exonic | FAM182B       | NA                      | NA                                                                                           | NA                              | rs115482967 | NA |
| chr20 | 25754620 | 25754620 | A  | G    | ncRNA_exonic | FAM182B       | NA                      | NA                                                                                           | NA                              | NA          | NA |
| chr20 | 25754622 | 25754622 | A  | G    | ncRNA_exonic | FAM182B       | NA                      | NA                                                                                           | NA                              | NA          | NA |
| chr20 | 25754689 | 25754689 | T  | C    | ncRNA_exonic | FAM182B       | NA                      | NA                                                                                           | NA                              | rs79458516  | NA |
| chr20 | 25754756 | 25754756 | G  | A    | ncRNA_exonic | FAM182B       | NA                      | NA                                                                                           | NA                              | rs76339741  | NA |
| chr20 | 25754774 | 25754774 | A  | C    | ncRNA_exonic | FAM182B       | NA                      | NA                                                                                           | NA                              | NA          | NA |
| chr20 | 25754782 | 25754782 | G  | T    | ncRNA_exonic | FAM182B       | NA                      | NA                                                                                           | NA                              | NA          | NA |
| chr20 | 25755751 | 25755751 | G  | A    | ncRNA_exonic | FAM182B       | NA                      | NA                                                                                           | NA                              | NA          | NA |
| chr20 | 25755770 | 25755770 | C  | G    | ncRNA_exonic | FAM182B       | NA                      | NA                                                                                           | NA                              | NA          | NA |
| chr20 | 26063630 | 26063630 | C  | T    | ncRNA_exonic | FAM182A       | NA                      | NA                                                                                           | NA                              | NA          | NA |
| chr20 | 26063651 | 26063651 | A  | G    | ncRNA_exonic | FAM182A       | NA                      | NA                                                                                           | NA                              | NA          | NA |
| chr20 | 26064144 | 26064144 | T  | C    | ncRNA_exonic | FAM182A       | NA                      | NA                                                                                           | NA                              | NA          | NA |
| chr20 | 26064389 | 26064389 | A  | T    | ncRNA_exonic | FAM182A       | NA                      | NA                                                                                           | NA                              | rs200923238 | NA |
| chr20 | 26064397 | 26064397 | G  | C    | ncRNA_exonic | FAM182A       | NA                      | NA                                                                                           | NA                              | rs112883466 | NA |
| chr20 | 26064961 | 26064961 | G  | C    | ncRNA_exonic | FAM182A       | NA                      | NA                                                                                           | NA                              | NA          | NA |
| chr20 | 26084296 | 26084296 | A  | G    | ncRNA_exonic | NCOR1P1       | NA                      | NA                                                                                           | D=COSM477938;OCCURENCE=1(kidney | rs1998943   | NA |
| chr20 | 29611898 | 29611898 | G  | C    | ncRNA_exonic | FRG1B         | NA                      | NA                                                                                           | NA                              | NA          | NA |
| chr20 | 29611950 | 29611950 | C  | T    | ncRNA_exonic | FRG1B         | NA                      | NA                                                                                           | NA                              | NA          | NA |
| chr20 | 29612047 | 29612047 | -  | G    | ncRNA_exonic | FRG1B         | NA                      | NA                                                                                           | NA                              | NA          | NA |
| chr20 | 29612048 | 29612048 | -  | CTTC | ncRNA_exonic | FRG1B         | NA                      | NA                                                                                           | NA                              | NA          | NA |
| chr20 | 29612050 | 29612050 | -  | CGA  | ncRNA_exonic | FRG1B         | NA                      | NA                                                                                           | NA                              | NA          | NA |
| chr20 | 29612052 | 29612052 | C  | T    | ncRNA_exonic | FRG1B         | NA                      | NA                                                                                           | NA                              | NA          | NA |
| chr20 | 29612063 | 29612063 | T  | C    | ncRNA_exonic | FRG1B         | NA                      | NA                                                                                           | NA                              | NA          | NA |
| chr20 | 29612087 | 29612087 | C  | T    | ncRNA_exonic | FRG1B         | NA                      | NA                                                                                           | NA                              | rs199702451 | NA |
| chr20 | 30921472 | 30921472 | G  | A    | UTR3         | KIF3B         | NA                      | NA                                                                                           | NA                              | NA          | NA |
| chr20 | 32664864 | 32664864 | -  | CAG  | exonic       | RALY          | nonframeshift insertion | 7:c.641_642insCAG;p.A214delinsAS,RALY:NM_016732:exon8:c.689_69                               | NA                              | rs10649600  | NA |
| chr20 | 33098206 | 33098206 | C  | T    | UTR3         | ITCH          | NA                      | NA                                                                                           | NA                              | NA          | NA |
| chr20 | 34818695 | 34818695 | T  | -    | UTR3         | EPB41L1       | NA                      | NA                                                                                           | NA                              | NA          | NA |
| chr20 | 35401969 | 35401969 | T  | G    | UTR5         | DSN1          | NA                      | NA                                                                                           | NA                              | NA          | NA |
| chr20 | 36845738 | 36845738 | C  | T    | exonic       | KIAA1755      | nonsynonymous SNV       | KIAA1755:NM_001029864:exon13:c.G2818A:p.E940K                                                | NA                              | rs760998    | B  |
| chr20 | 40706453 | 40706453 | -  | TTTT | UTR3         | PTPRT         | NA                      | NA                                                                                           | NA                              | NA          | NA |
| chr20 | 43955092 | 43955092 | C  | A    | UTR3         | SDC4          | NA                      | NA                                                                                           | NA                              | NA          | NA |
| chr20 | 43955096 | 43955096 | C  | A    | UTR3         | SDC4          | NA                      | NA                                                                                           | NA                              | NA          | NA |
| chr20 | 48251231 | 48251231 | T  | C    | UTR3         | B4GALT5       | NA                      | NA                                                                                           | NA                              | rs235033    | NA |
| chr20 | 48251757 | 48251757 | C  | T    | UTR3         | B4GALT5       | NA                      | NA                                                                                           | NA                              | NA          | NA |
| chr20 | 48251758 | 48251758 | A  | C    | UTR3         | B4GALT5       | NA                      | NA                                                                                           | NA                              | NA          | NA |
| chr20 | 48251759 | 48251759 | C  | G    | UTR3         | B4GALT5       | NA                      | NA                                                                                           | NA                              | NA          | NA |
| chr20 | 49367485 | 49367485 | A  | T    | UTR3         | PARD6B        | NA                      | NA                                                                                           | NA                              | NA          | NA |
| chr20 | 49367490 | 49367490 | G  | T    | UTR3         | PARD6B        | NA                      | NA                                                                                           | NA                              | NA          | NA |
| chr20 | 49367491 | 49367491 | A  | T    | UTR3         | PARD6B        | NA                      | NA                                                                                           | NA                              | NA          | NA |
| chr20 | 49367817 | 49367817 | -  | A    | UTR3         | PARD6B        | NA                      | NA                                                                                           | NA                              | rs149372097 | NA |
| chr20 | 51589531 | 51589531 | G  | A    | UTR5         | TSHZ2         | NA                      | NA                                                                                           | NA                              | NA          | NA |
| chr20 | 52560855 | 52560855 | TT | -    | UTR3         | BCAS1         | NA                      | NA                                                                                           | NA                              | rs74631158  | NA |
| chr20 | 55213716 | 55213716 | TT | -    | UTR3         | TFAP2C        | NA                      | NA                                                                                           | NA                              | NA          | NA |
| chr20 | 60709499 | 60709499 | C  | T    | UTR3         | LSM14B        | NA                      | NA                                                                                           | NA                              | NA          | NA |
| chr20 | 60790986 | 60790986 | T  | G    | UTR3         | HRH3          | NA                      | NA                                                                                           | NA                              | NA          | NA |
| chr20 | 61145196 | 61145196 | G  | A    | ncRNA_exonic | C20orf166-AS1 | NA                      | NA                                                                                           | NA                              | rs12479469  | NA |
| chr20 | 61732921 | 61732921 | T  | C    | ncRNA_exonic | HAR1A         | NA                      | NA                                                                                           | NA                              | rs73147778  | NA |
| chr20 | 61733110 | 61733110 | C  | T    | ncRNA_exonic | HAR1A         | NA                      | NA                                                                                           | NA                              | rs6122370   | NA |
| chr20 | 61888686 | 61888686 | A  | G    | ncRNA_exonic | FLJ16779      | NA                      | NA                                                                                           | NA                              | NA          | NA |
| chr20 | 61888896 | 61888896 | A  | G    | ncRNA_exonic | FLJ16779      | NA                      | NA                                                                                           | NA                              | rs35166508  | NA |
| chr20 | 61888957 | 61888957 | T  | C    | ncRNA_exonic | FLJ16779      | NA                      | NA                                                                                           | NA                              | rs62207452  | NA |
| chr20 | 62374441 | 62374441 | T  | C    | UTR3         | SLC2A4RG      | NA                      | NA                                                                                           | NA                              | rs6742      | NA |
| chr20 | 62563531 | 62563531 | T  | G    | UTR3         | DNAJC5        | NA                      | NA                                                                                           | NA                              | NA          | NA |
| chr21 | 9909179  | 9909179  | C  | A    | ncRNA_exonic | TEKT4P2       | NA                      | NA                                                                                           | NA                              | rs1052872   | NA |
| chr21 | 9909208  | 9909208  | C  | T    | ncRNA_exonic | TEKT4P2       | NA                      | NA                                                                                           | NA                              | rs4061664   | NA |
| chr21 | 9909218  | 9909218  | G  | A    | ncRNA_exonic | TEKT4P2       | NA                      | NA                                                                                           | NA                              | rs1052870   | NA |
| chr21 | 9909219  | 9909219  | T  | C    | ncRNA_exonic | TEKT4P2       | NA                      | NA                                                                                           | NA                              | rs1052868   | NA |
| chr21 | 10942995 | 10942995 | G  | A    | exonic       | TPTE          | stopgain SNV            | 78T:p.R160X,TPTE:NM_199259:exon11:c.C538T;p.R180X,TPTE:NM_19 ID=COSM376393;OCCURENCE=2(lung) | rs147014138                     | NA          | NA |
| chr21 | 14414855 | 14414855 | A  | G    | ncRNA_exonic | ANKRD30BP2    | NA                      | NA                                                                                           | NA                              | rs201948955 | NA |
| chr21 | 15481168 | 15481168 | C  | A    | UTR3         | LIPI          | NA                      | NA                                                                                           | NA                              | rs62208635  | NA |
| chr21 | 28338423 | 28338423 | C  | G    | exonic       | ADAMTSS5      | synonymous SNV          | ADAMTSS5:NM_007038:exon1:c.G288C:p.R96R                                                      | NA                              | rs55933916  | NA |
| chr21 | 28338953 | 28338953 | G  | -    | UTR5         | ADAMTSS5      | NA                      | NA                                                                                           | NA                              | NA          | NA |
| chr21 | 28339012 | 28339012 | T  | A    | UTR5         | ADAMTSS5      | NA                      | NA                                                                                           | NA                              | NA          | NA |
| chr21 | 28339031 | 28339031 | C  | A    | UTR5         | ADAMTSS5      | NA                      | NA                                                                                           | NA                              | NA          | NA |

|       |          |          |          |     |              |              |                         |                                                                                               |    |             |    |
|-------|----------|----------|----------|-----|--------------|--------------|-------------------------|-----------------------------------------------------------------------------------------------|----|-------------|----|
| chr21 | 30445948 | 30445948 | G        | A   | UTR5         | CCT8         | NA                      | NA                                                                                            | NA | rs2070610   | NA |
| chr21 | 32491788 | 32491788 | -        | A   | UTR3         | TIAM1        | NA                      | NA                                                                                            | NA | rs113766273 | NA |
| chr21 | 34809434 | 34809434 | T        | -   | UTR3         | IFNGR2       | NA                      | NA                                                                                            | NA | rs71657077  | NA |
| chr21 | 38081480 | 38081480 | C        | T   | exonic       | SIM2         | nonsynonymous SNV       | NM_005069:exon2:c.C188T;p.A63V,SIM2:NM_009586:exon2:c.C188T;p                                 | NA | rs116988298 | B  |
| chr21 | 40562156 | 40562156 | -        | T   | UTR3         | BRWD1        | NA                      | NA                                                                                            | NA | rs5843953   | NA |
| chr21 | 42551319 | 42551319 | T        | G   | exonic       | PLAC4        | synonymous SNV          | PLAC4:NM_182832:exon1:c.A237C;p.S79S                                                          | NA | NA          | NA |
| chr21 | 43099670 | 43099670 | T        | C   | ncRNA_exonic | LINC00111    | NA                      | NA                                                                                            | NA | rs73216940  | NA |
| chr21 | 44838931 | 44838931 | A        | G   | exonic       | SIK1         | nonsynonymous SNV       | SIK1:NM_173354:exon11:c.T1432C;p.S478P                                                        | NA | NA          | P  |
| chr21 | 44838946 | 44838946 | T        | G   | exonic       | SIK1         | nonsynonymous SNV       | SIK1:NM_173354:exon11:c.A1417C;p.T473P                                                        | NA | NA          | B  |
| chr21 | 45553596 | 45553596 | T        | C   | exonic       | C21orf33     | nonsynonymous SNV       | 3:NM_004649:exon1:c.T17C;p.V6A,C21orf33:NM_198155:exon1:c.T17                                 | NA | rs968714    | NA |
| chr21 | 45564932 | 45564932 | T        | -   | UTR3         | C21orf33     | NA                      | NA                                                                                            | NA | rs6662664   | NA |
| chr21 | 45953778 | 45953778 | G        | T   | exonic       | TSPEAR       | nonsynonymous SNV       | 1_144991:exon3:c.C332A;p.A111E,TSPEAR:NM_001272037:exon4:c.C1                                 | NA | NA          | B  |
| chr21 | 46711357 | 46711357 | T        | C   | ncRNA_exonic | LOC642852    | NA                      | NA                                                                                            | NA | rs4819053   | NA |
| chr21 | 47532093 | 47532093 | G        | A   | exonic       | COL6A2       | nonsynonymous SNV       | .6A:p.E106K,COL6A2:NM_058174:exon3:c.G316A;p.E106K,COL6A2:NM                                  | NA | rs141703710 | D  |
| chr21 | 47721985 | 47721985 | -        | TGG | exonic       | C21orf58     | nonframeshift insertion | C21orf58:NM_058180:exon8:c.897_898insCCA;p.H299delinsHH                                       | NA | rs71318063  | NA |
| chr22 | 18778584 | 18778584 | A        | G   | ncRNA_exonic | GGT3P        | NA                      | NA                                                                                            | NA | rs3984302   | NA |
| chr22 | 18900641 | 18900641 | T        | G   | UTR3         | PRODH        | NA                      | NA                                                                                            | NA | NA          | NA |
| chr22 | 18900645 | 18900645 | C        | G   | UTR3         | PRODH        | NA                      | NA                                                                                            | NA | NA          | NA |
| chr22 | 18978385 | 18978385 | A        | C   | ncRNA_exonic | DGCR5        | NA                      | NA                                                                                            | NA | NA          | NA |
| chr22 | 19189003 | 19189003 | -        | C   | exonic       | CLTCL1       | frameshift insertion    | on23:c.3602_3603insG;p.V1201fs,CLTCL1:NM_007098:exon23:c.360                                  | NA | rs78649162  | NA |
| chr22 | 19492888 | 19492888 | G        | A   | exonic       | CDC45        | nonsynonymous SNV       | 1A:p.M190I,CDC45:NM_003504:exon10:c.G708A;p.M236I,CDC45:NM_                                   | NA | NA          | B  |
| chr22 | 19511055 | 19511055 | C        | A   | UTR3         | CLDN5        | NA                      | NA                                                                                            | NA | rs756654    | NA |
| chr22 | 19834263 | 19834263 | C        | A   | UTR3         | C22orf29     | NA                      | NA                                                                                            | NA | NA          | NA |
| chr22 | 20385740 | 20385743 | TGTC     | -   | ncRNA_exonic | PI4KAP1      | NA                      | NA                                                                                            | NA | rs146242498 | NA |
| chr22 | 21044156 | 21044156 | C        | A   | ncRNA_exonic | POM121L4P    | NA                      | NA                                                                                            | NA | rs192873282 | NA |
| chr22 | 21638467 | 21638467 | C        | T   | ncRNA_exonic | POM121L8P    | NA                      | NA                                                                                            | NA | rs201227017 | NA |
| chr22 | 21647455 | 21647455 | G        | A   | ncRNA_exonic | POM121L8P    | NA                      | NA                                                                                            | NA | rs140413    | NA |
| chr22 | 21649095 | 21649095 | C        | -   | ncRNA_exonic | POM121L8P    | NA                      | NA                                                                                            | NA | NA          | NA |
| chr22 | 21838339 | 21838339 | C        | T   | ncRNA_exonic | PI4KAP2      | NA                      | NA                                                                                            | NA | rs201760046 | NA |
| chr22 | 22311882 | 22311882 | G        | A   | exonic       | TOP3B        | synonymous SNV          | TOP3B:NM_003935:exon18:c.C2193T;p.S731S                                                       | NA | rs145256528 | NA |
| chr22 | 22874497 | 22874497 | A        | G   | UTR5         | ZNF280A      | NA                      | NA                                                                                            | NA | rs4822091   | NA |
| chr22 | 24227246 | 24227246 | A        | C   | UTR3         | SLC2A11      | NA                      | NA                                                                                            | NA | rs6003939   | NA |
| chr22 | 24314148 | 24314148 | A        | C   | UTR3         | DDTL         | NA                      | NA                                                                                            | NA | NA          | NA |
| chr22 | 24314187 | 24314187 | G        | C   | UTR3         | DDTL         | NA                      | NA                                                                                            | NA | NA          | NA |
| chr22 | 24659734 | 24659734 | T        | C   | ncRNA_exonic | POM121L9P    | NA                      | NA                                                                                            | NA | NA          | NA |
| chr22 | 24659741 | 24659741 | G        | A   | ncRNA_exonic | POM121L9P    | NA                      | NA                                                                                            | NA | NA          | NA |
| chr22 | 24981641 | 24981641 | T        | G   | UTR3         | FAM211B      | NA                      | NA                                                                                            | NA | NA          | NA |
| chr22 | 25023893 | 25023893 | G        | A   | exonic       | GGT1         | nonsynonymous SNV       | 001032365:exon13:c.G1283A;p.S428N,GGT1:NM_005265:exon13:c.G::OSM137241;OCCURENCE=7(kidney),1( | NA | rs201313233 | B  |
| chr22 | 25042887 | 25042887 | G        | A   | ncRNA_exonic | POM121L10P   | NA                      | NA                                                                                            | NA | rs75939659  | NA |
| chr22 | 25044743 | 25044743 | A        | G   | ncRNA_exonic | POM121L10P   | NA                      | NA                                                                                            | NA | rs71242990  | NA |
| chr22 | 25264460 | 25264460 | T        | C   | exonic       | SGSM1        | nonsynonymous SNV       | 01098497:exon11:c.T1112C;p.L371P,SGSM1:NM_001098498:exon11:                                   | NA | NA          | NA |
| chr22 | 25603066 | 25603066 | C        | G   | exonic       | CRYBB3       | nonsynonymous SNV       | CRYBB3:NM_004076:exon6:c.C523G;p.R175G                                                        | NA | NA          | P  |
| chr22 | 26847960 | 26847974 | TGCGCGCG | GCA | UTR3         | HPS4         | NA                      | NA                                                                                            | NA | NA          | NA |
| chr22 | 27066019 | 27066019 | -        | T   | ncRNA_exonic | MIAT         | NA                      | NA                                                                                            | NA | NA          | NA |
| chr22 | 29885823 | 29885823 | A        | T   | exonic       | NEFH         | nonsynonymous SNV       | NEFH:NM_021076:exon4:c.A2194T;p.T732S                                                         | NA | rs145125701 | NA |
| chr22 | 29932727 | 29932727 | C        | A   | exonic       | THOC5        | nonsynonymous SNV       | _003678:exon7:c.G600T;p.R200S,THOC5:NM_001002877:exon8:c.G60                                  | NA | NA          | P  |
| chr22 | 30221159 | 30221159 | G        | A   | exonic       | ASCC2        | nonsynonymous SNV       | 1_001242906:exon3:c.C169T;p.P57S,ASCC2:NM_032204:exon4:c.C328                                 | NA | NA          | B  |
| chr22 | 31677586 | 31677586 | T        | -   | UTR3         | PIK3IP1      | NA                      | NA                                                                                            | NA | rs11301764  | NA |
| chr22 | 32353392 | 32353392 | T        | -   | UTR3         | YWHAH        | NA                      | NA                                                                                            | NA | rs71790951  | NA |
| chr22 | 33256901 | 33256901 | T        | -   | UTR3         | TIMP3        | NA                      | NA                                                                                            | NA | NA          | NA |
| chr22 | 36587952 | 36587952 | C        | T   | exonic       | APOL4        | unknown                 | UNKNOWN                                                                                       | NA | rs2227169   | NA |
| chr22 | 36662951 | 36662951 | A        | -   | UTR3         | APOL1        | NA                      | NA                                                                                            | NA | rs11321251  | NA |
| chr22 | 38120503 | 38120503 | G        | A   | exonic       | TRIOBP       | nonsynonymous SNV       | TRIOBP:NM_001039141:exon7:c.G1940A;p.S647N                                                    | NA | NA          | B  |
| chr22 | 38823832 | 38823832 | A        | C   | exonic       | KCNJ4        | synonymous SNV          | 4_004981:exon2:c.T306G;p.G102G,KCNJ4:NM_152868:exon2:c.T306G                                  | NA | NA          | NA |
| chr22 | 39414807 | 39414807 | C        | A   | UTR3         | APOBEC3C     | NA                      | NA                                                                                            | NA | NA          | NA |
| chr22 | 40720295 | 40720295 | T        | -   | UTR3         | TNRC6B       | NA                      | NA                                                                                            | NA | rs71722737  | NA |
| chr22 | 42524795 | 42524795 | A        | G   | exonic       | CYP2D6       | synonymous SNV          | 1_001025161:exon3:c.T504C;p.F168F,CYP2D6:NM_000106:exon4:c.T6!                                | NA | rs28371713  | NA |
| chr22 | 46436143 | 46436143 | -        | T   | ncRNA_exonic | LOC100271722 | NA                      | NA                                                                                            | NA | NA          | NA |
| chr22 | 46712068 | 46712068 | C        | A   | exonic       | GTSE1        | synonymous SNV          | GTSE1:NM_016426:exon7:c.C1191A;p.A397A                                                        | NA | NA          | NA |
| chr22 | 50655686 | 50655686 | C        | G   | exonic       | SELO         | unknown                 | UNKNOWN                                                                                       | NA | NA          | B  |
| chrX  | 3523054  | 3523057  | ACAC     | -   | UTR3         | PRKX         | NA                      | NA                                                                                            | NA | NA          | NA |
| chrX  | 5810090  | 5810090  | A        | G   | UTR3         | NLGN4X       | NA                      | NA                                                                                            | NA | rs3810685   | NA |
| chrX  | 7269977  | 7269977  | A        | -   | UTR3         | STS          | NA                      | NA                                                                                            | NA | NA          | NA |
| chrX  | 7272225  | 7272225  | G        | A   | UTR3         | STS          | NA                      | NA                                                                                            | NA | rs13648     | NA |
| chrX  | 7811747  | 7811747  | T        | C   | exonic       | VCX          | nonsynonymous SNV       | VCX:NM_013452:exon3:c.T311C;p.L104P                                                           | NA | rs71247277  | NA |
| chrX  | 8434161  | 8434161  | G        | A   | exonic       | VCX3B        | nonsynonymous SNV       | VCX3B:NM_001001888:exon3:c.G478A;p.V160M                                                      | NA | rs6640132   | NA |

|      |          |          |            |   |              |           |                   |                                                               |                                   |             |    |
|------|----------|----------|------------|---|--------------|-----------|-------------------|---------------------------------------------------------------|-----------------------------------|-------------|----|
| chrX | 10416148 | 10416148 | T          | - | UTR3         | MID1      | NA                | NA                                                            | NA                                | NA          | NA |
| chrX | 12841434 | 12841434 | C          | T | UTR3         | PRPS2     | NA                | NA                                                            | NA                                | NA          | NA |
| chrX | 15511350 | 15511350 | T          | G | UTR5         | PIR       | NA                | NA                                                            | NA                                | NA          | NA |
| chrX | 19552343 | 19552343 | G          | T | UTR3         | SH3KBP1   | NA                | NA                                                            | NA                                | NA          | NA |
| chrX | 20134980 | 20134980 | G          | A | exonic       | MAP7D2    | synonymous SNV    | .C18T:p.G6G,MAP7D2:NM_001168466:exon1:c.C18T:p.G6G,MAP7D2:    | NA                                | rs17523345  | NA |
| chrX | 23761386 | 23761386 | C          | G | UTR5         | ACOT9     | NA                | NA                                                            | NA                                | rs5925605   | NA |
| chrX | 30748293 | 30748293 | T          | C | UTR3         | GK        | NA                | NA                                                            | NA                                | rs5972221   | NA |
| chrX | 30748338 | 30748338 | T          | C | UTR3         | GK        | NA                | NA                                                            | NA                                | rs73452162  | NA |
| chrX | 31196550 | 31196550 | T          | - | UTR3         | DMD       | NA                | NA                                                            | NA                                | rs11333372  | NA |
| chrX | 35816613 | 35816613 | G          | A | UTR5         | MAGEB16   | NA                | NA                                                            | NA                                | rs138684392 | NA |
| chrX | 37027663 | 37027663 | A          | C | exonic       | FAM47C    | nonsynonymous SNV | FAM47C:NM_001013736:exon1:c.A1180C:p.T394P                    | NA                                | NA          | NA |
| chrX | 37027874 | 37027874 | T          | C | exonic       | FAM47C    | nonsynonymous SNV | FAM47C:NM_001013736:exon1:c.T1391C:p.L464P                    | NA                                | NA          | NA |
| chrX | 37028069 | 37028069 | T          | C | exonic       | FAM47C    | nonsynonymous SNV | FAM47C:NM_001013736:exon1:c.T1586C:p.I529T                    | NA                                | NA          | NA |
| chrX | 37028182 | 37028182 | A          | G | exonic       | FAM47C    | nonsynonymous SNV | FAM47C:NM_001013736:exon1:c.A1699G:p.M567V                    | NA                                | NA          | NA |
| chrX | 37028402 | 37028402 | A          | C | exonic       | FAM47C    | nonsynonymous SNV | FAM47C:NM_001013736:exon1:c.A1919C:p.Y640S                    | NA                                | NA          | NA |
| chrX | 38664818 | 38664818 | T          | - | UTR3         | MID1IP1   | NA                | NA                                                            | NA                                | NA          | NA |
| chrX | 41093299 | 41093299 | T          | - | UTR3         | USP9X     | NA                | NA                                                            | NA                                | NA          | NA |
| chrX | 46358117 | 46358117 | C          | T | UTR3         | ZNF674    | NA                | NA                                                            | NA                                | rs55678135  | NA |
| chrX | 47107351 | 47107351 | A          | - | UTR3         | USP11     | NA                | NA                                                            | NA                                | NA          | NA |
| chrX | 48457034 | 48457034 | -          | C | UTR5         | WDR13     | NA                | NA                                                            | NA                                | NA          | NA |
| chrX | 48925016 | 48925016 | G          | A | exonic       | CCDC120   | nonsynonymous SNV | J1163323:exon10:c.G1225A:p.A409T,CCDC120:NM_001271835:exon1   | NA                                | NA          | P  |
| chrX | 49178517 | 49178517 | T          | C | UTR5         | GAGE12J   | NA                | NA                                                            | NA                                | NA          | NA |
| chrX | 53405283 | 53405283 | C          | A | UTR3         | SMC1A     | NA                | NA                                                            | NA                                | NA          | NA |
| chrX | 54222891 | 54222891 | -          | A | UTR3         | WNK3      | NA                | NA                                                            | NA                                | NA          | NA |
| chrX | 54224160 | 54224160 | -          | A | UTR3         | WNK3      | NA                | NA                                                            | NA                                | NA          | NA |
| chrX | 54587505 | 54587506 | AA         | - | UTR3         | GNL3L     | NA                | NA                                                            | NA                                | rs148333990 | NA |
| chrX | 55172630 | 55172630 | G          | A | exonic       | FAM104B   | stopgain SNV      | A_001166701:exon3:c.C235T:p.Q79X,FAM104B:NM_001166702:exon3   | NA                                | rs113263757 | NA |
| chrX | 55478566 | 55478566 | G          | T | UTR5         | MAGEH1    | NA                | NA                                                            | NA                                | NA          | NA |
| chrX | 68836245 | 68836245 | T          | C | exonic       | EDA       | synonymous SNV    | :c.T93C:p.P31P,EDA:NM_001005612:exon1:c.T93C:p.P31P,EDA:NM_0  | NA                                | NA          | NA |
| chrX | 70387344 | 70387344 | A          | C | exonic       | NLGN3     | nonsynonymous SNV | :!77C:p.N426T,NLGN3:NM_018977:exon6:c.A1337C:p.N446T,NLGN3:NI | NA                                | NA          | D  |
| chrX | 70520238 | 70520238 | T          | - | ncRNA_UTR3   | NONO      | NA                | NA                                                            | NA                                | rs34459863  | NA |
| chrX | 72297562 | 72297565 | ACAC       | - | UTR3         | PABPC1L2A | NA                | NA                                                            | NA                                | NA          | NA |
| chrX | 72298326 | 72298326 | T          | C | UTR3         | PABPC1L2A | NA                | NA                                                            | NA                                | rs182890337 | NA |
| chrX | 72346969 | 72346969 | A          | C | ncRNA_exonic | NAP1L6    | NA                | NA                                                            | NA                                | NA          | NA |
| chrX | 74590359 | 74590368 | TTTTTTTTTT | - | UTR3         | ZDHHC15   | NA                | NA                                                            | NA                                | NA          | NA |
| chrX | 77268407 | 77268407 | C          | A | exonic       | ATP7A     | nonsynonymous SNV | ATP7A:NM_000052:exon10:c.C2204A:p.A735D                       | NA                                | NA          | D  |
| chrX | 86924601 | 86924601 | A          | - | UTR3         | KLHL4     | NA                | NA                                                            | NA                                | NA          | NA |
| chrX | 1.09E+08 | 1.09E+08 | T          | - | UTR3         | TMEM164   | NA                | NA                                                            | NA                                | rs34813944  | NA |
| chrX | 1.1E+08  | 1.1E+08  | C          | T | UTR3         | CHRDL1    | NA                | NA                                                            | NA                                | rs12007691  | NA |
| chrX | 1.1E+08  | 1.1E+08  | A          | - | downstream   | PAK3      | NA                | NA                                                            | NA                                | rs67997504  | NA |
| chrX | 1.11E+08 | 1.11E+08 | AA         | - | UTR3         | DCX       | NA                | NA                                                            | NA                                | NA          | NA |
| chrX | 1.2E+08  | 1.2E+08  | GT         | - | UTR3         | MCTS1     | NA                | NA                                                            | NA                                | rs10563395  | NA |
| chrX | 1.31E+08 | 1.31E+08 | GAGAGAGA   | - | UTR3         | RAP2C     | NA                | NA                                                            | NA                                | NA          | NA |
| chrX | 1.31E+08 | 1.31E+08 | C          | A | UTR3         | RAP2C     | NA                | NA                                                            | NA                                | rs200211416 | NA |
| chrX | 1.36E+08 | 1.36E+08 | T          | C | exonic       | RBMX      | synonymous SNV    | RBMX:NM_002139:exon5:c.A507G:p.G169G                          | NA                                | rs112800567 | NA |
| chrX | 1.36E+08 | 1.36E+08 | G          | C | exonic       | RBMX      | nonsynonymous SNV | RBMX:NM_002139:exon5:c.C499G:p.P167A                          | NA                                | rs112089728 | D  |
| chrX | 1.36E+08 | 1.36E+08 | C          | A | exonic       | RBMX      | nonsynonymous SNV | RBMX:NM_002139:exon5:c.G473T:p.G158V                          | NA                                | rs78702689  | B  |
| chrX | 1.41E+08 | 1.41E+08 | A          | T | exonic       | MAGEC1    | synonymous SNV    | MAGEC1:NM_005462:exon4:c.A591T:p.P197P                        | NA                                | rs151047723 | NA |
| chrX | 1.41E+08 | 1.41E+08 | A          | - | UTR3         | MAGEC2    | NA                | NA                                                            | NA                                | NA          | NA |
| chrX | 1.45E+08 | 1.45E+08 | TTTT       | - | UTR3         | SLITRK2   | NA                | NA                                                            | NA                                | NA          | NA |
| chrX | 1.5E+08  | 1.5E+08  | C          | A | exonic       | MAMLD1    | nonsynonymous SNV | IA:p.T125N,MAMLD1:NM_001177465:exon3:c.C374A:p.T125N,MAMLI    | NA                                | NA          | P  |
| chrX | 1.53E+08 | 1.53E+08 | T          | C | UTR3         | BGN       | NA                | NA                                                            | NA                                | rs1126598   | NA |
| chrX | 1.53E+08 | 1.53E+08 | AACCGCC/   | - | UTR3         | BGN       | NA                | NA                                                            | NA                                | rs71869600  | NA |
| chrX | 1.53E+08 | 1.53E+08 | T          | G | UTR3         | DUSP9     | NA                | NA                                                            | NA                                | NA          | NA |
| chrX | 1.53E+08 | 1.53E+08 | T          | G | UTR3         | HCF1      | NA                | NA                                                            | COSN414031;OCCURENCE=1(urinary_tr | NA          | NA |
| chrX | 1.53E+08 | 1.53E+08 | T          | G | exonic       | OPN1LW    | nonsynonymous SNV | OPN1LW:NM_020061:exon3:c.T538G:p.S180A                        | NA                                | rs949431    | B  |
| chr1 | 14699    | 14699    | C          | G | ncRNA_exonic | WASH7P    | NA                | NA                                                            | NA                                | rs11490464  | NA |
| chr1 | 15817    | 15817    | G          | T | ncRNA_exonic | WASH7P    | NA                | NA                                                            | NA                                | rs2691316   | NA |
| chr1 | 15820    | 15820    | G          | T | ncRNA_exonic | WASH7P    | NA                | NA                                                            | NA                                | rs200482301 | NA |
| chr1 | 17626    | 17626    | G          | A | ncRNA_exonic | WASH7P    | NA                | NA                                                            | NA                                | rs11555814  | NA |
| chr1 | 17697    | 17697    | G          | C | ncRNA_exonic | WASH7P    | NA                | NA                                                            | NA                                | rs71260069  | NA |
| chr1 | 69511    | 69511    | A          | G | exonic       | OR4F5     | nonsynonymous SNV | OR4F5:NM_001005484:exon1:c.A421G:p.T141A                      | NA                                | rs2691305   | B  |
| chr1 | 789141   | 789141   | G          | C | ncRNA_exonic | LOC643837 | NA                | NA                                                            | NA                                | rs111606675 | NA |
| chr1 | 900718   | 900721   | TTAT       | - | UTR3         | KLHL17    | NA                | NA                                                            | NA                                | rs142545439 | NA |
| chr1 | 985362   | 985362   | G          | T | exonic       | AGRN      | nonsynonymous SNV | AGRN:NM_198576:exon27:c.G4824T:p.E1608D                       | NA                                | NA          | B  |
| chr1 | 1019753  | 1019753  | A          | G | exonic       | C1orf159  | nonsynonymous SNV | C1orf159:NM_017891:exon9:c.T482C:p.I161T                      | NA                                | NA          | P  |

|      |          |          |          |   |              |               |                   |                                                                                                                            |    |             |    |
|------|----------|----------|----------|---|--------------|---------------|-------------------|----------------------------------------------------------------------------------------------------------------------------|----|-------------|----|
| chr1 | 1139202  | 1139202  | T        | C | exonic       | TNFRSF18      | synonymous SNV    | TNFRSF18:NM_148901:exon4:c.A537G:p.P179P                                                                                   | NA | rs2298213   | NA |
| chr1 | 1263689  | 1263689  | T        | G | UTR3         | GLTPD1        | NA                | NA                                                                                                                         | NA | NA          | NA |
| chr1 | 1310668  | 1310668  | A        | C | UTR5         | AURKAIP1      | NA                | NA                                                                                                                         | NA | rs2242398   | NA |
| chr1 | 1650801  | 1650801  | T        | C | exonic       | CDK11A,CDK11B | synonymous SNV    | CDK11A:NM_001212121:exon4:c.A321G:p.E107E,CDK11B:NM_033493:exon4:c.A321G:p.E107E,CDK11A:NM_001212121:exon4:c.A321G:p.E107E | NA | rs1137004   | NA |
| chr1 | 2120733  | 2120733  | -        | G | intronic     | C1orf86       | NA                | NA                                                                                                                         | NA | rs146903099 | NA |
| chr1 | 3319390  | 3319390  | C        | T | exonic       | PRDM16        | nonsynonymous SNV | PRDM16:NM_022114:exon6:c.C712T:p.L238F,PRDM16:NM_199454:exon6:c.C712T:p.L238F                                              | NA | NA          | NA |
| chr1 | 3352764  | 3352765  | TT       | - | UTR3         | PRDM16        | NA                | NA                                                                                                                         | NA | NA          | NA |
| chr1 | 3418391  | 3418391  | C        | T | exonic       | MEGF6         | synonymous SNV    | MEGF6:NM_001409:exon18:c.G2283A:p.P761P                                                                                    | NA | rs4648508   | NA |
| chr1 | 3656396  | 3656396  | C        | T | ncRNA_exonic | TP73-AS1      | NA                | NA                                                                                                                         | NA | NA          | NA |
| chr1 | 3656558  | 3656558  | T        | C | ncRNA_exonic | TP73-AS1      | NA                | NA                                                                                                                         | NA | NA          | NA |
| chr1 | 3656605  | 3656605  | T        | C | ncRNA_exonic | TP73-AS1      | NA                | NA                                                                                                                         | NA | NA          | NA |
| chr1 | 3656637  | 3656637  | T        | A | ncRNA_exonic | TP73-AS1      | NA                | NA                                                                                                                         | NA | NA          | NA |
| chr1 | 3696890  | 3696890  | A        | C | UTR3         | LRRC47        | NA                | NA                                                                                                                         | NA | rs8379      | NA |
| chr1 | 4472155  | 4472155  | A        | - | ncRNA_exonic | LOC284661     | NA                | NA                                                                                                                         | NA | rs34773421  | NA |
| chr1 | 6308965  | 6308965  | T        | G | UTR3         | GPR153        | NA                | NA                                                                                                                         | NA | NA          | NA |
| chr1 | 6308981  | 6308981  | A        | G | UTR3         | GPR153        | NA                | NA                                                                                                                         | NA | NA          | NA |
| chr1 | 6501044  | 6501044  | C        | G | exonic       | ESPN          | synonymous SNV    | ESPN:NM_031475:exon5:c.C909G:p.R303R                                                                                       | NA | rs2311045   | NA |
| chr1 | 6526465  | 6526465  | C        | G | UTR3         | PLEKHG5       | NA                | NA                                                                                                                         | NA | rs2986754   | NA |
| chr1 | 6531124  | 6531124  | T        | C | exonic       | PLEKHG5       | nonsynonymous SNV | PLEKHG5:NM_001265594:exon13:c.A1318G:p.M440V,PLEKHG5:NM_020631:exon13:c.A1318G:p.M440V                                     | NA | rs61740145  | P  |
| chr1 | 6531589  | 6531589  | C        | T | exonic       | PLEKHG5       | nonsynonymous SNV | PLEKHG5:NM_001265594:exon12:c.G1240A:p.A414T,PLEKHG5:NM_020631:exon12:c.G1240A:p.A414T                                     | NA | rs74809741  | B  |
| chr1 | 6550505  | 6550505  | C        | T | UTR5         | PLEKHG5       | NA                | NA                                                                                                                         | NA | rs11806429  | NA |
| chr1 | 6682289  | 6682289  | T        | G | UTR3         | PHF13         | NA                | NA                                                                                                                         | NA | NA          | NA |
| chr1 | 7828174  | 7828175  | AA       | - | UTR3         | CAMTA1        | NA                | NA                                                                                                                         | NA | NA          | NA |
| chr1 | 7907805  | 7907805  | -        | T | UTR3         | UTS2          | NA                | NA                                                                                                                         | NA | rs112820691 | NA |
| chr1 | 9328298  | 9328298  | A        | - | UTR3         | H6PD          | NA                | NA                                                                                                                         | NA | NA          | NA |
| chr1 | 9780836  | 9780836  | T        | G | exonic       | PIK3CD        | nonsynonymous SNV | PIK3CD:NM_005026:exon13:c.T1558G:p.S520A                                                                                   | NA | rs201274224 | B  |
| chr1 | 9910659  | 9910659  | G        | A | UTR3         | CTNNBIP1      | NA                | NA                                                                                                                         | NA | rs71643073  | NA |
| chr1 | 11014118 | 11014118 | C        | T | exonic       | C1orf127      | nonsynonymous SNV | C1orf127:NM_001170754:exon10:c.G1057A:p.A353T                                                                              | NA | rs45537241  | P  |
| chr1 | 11562913 | 11562913 | C        | T | exonic       | PTCHD2        | synonymous SNV    | PTCHD2:NM_020780:exon3:c.C1275T:p.F425F                                                                                    | NA | rs60362998  | NA |
| chr1 | 11796169 | 11796173 | GGGCG    | - | UTR5         | AGTRAP        | NA                | NA                                                                                                                         | NA | rs146190997 | NA |
| chr1 | 11846092 | 11846092 | -        | T | UTR3         | MTHFR         | NA                | NA                                                                                                                         | NA | rs112870018 | NA |
| chr1 | 12888545 | 12888545 | C        | T | UTR5         | PRAMEF11      | NA                | NA                                                                                                                         | NA | rs2982101   | NA |
| chr1 | 12888569 | 12888569 | G        | C | UTR5         | PRAMEF11      | NA                | NA                                                                                                                         | NA | rs78453011  | NA |
| chr1 | 12888595 | 12888595 | G        | C | UTR5         | PRAMEF11      | NA                | NA                                                                                                                         | NA | rs76039145  | NA |
| chr1 | 12919642 | 12919642 | G        | A | exonic       | PRAMEF2       | nonsynonymous SNV | PRAMEF2:NM_023014:exon3:c.G382A:p.A128T                                                                                    | NA | rs142476002 | B  |
| chr1 | 12919833 | 12919833 | A        | G | exonic       | PRAMEF2       | synonymous SNV    | PRAMEF2:NM_023014:exon3:c.A573G:p.P191P                                                                                    | NA | NA          | NA |
| chr1 | 12919840 | 12919840 | T        | C | exonic       | PRAMEF2       | nonsynonymous SNV | PRAMEF2:NM_023014:exon3:c.T580C:p.Y194H                                                                                    | NA | NA          | B  |
| chr1 | 12921127 | 12921127 | A        | G | exonic       | PRAMEF2       | synonymous SNV    | PRAMEF2:NM_023014:exon4:c.A918G:p.L306L                                                                                    | NA | rs12139549  | NA |
| chr1 | 12921136 | 12921136 | C        | T | exonic       | PRAMEF2       | synonymous SNV    | PRAMEF2:NM_023014:exon4:c.C927T:p.D309D                                                                                    | NA | NA          | NA |
| chr1 | 12921137 | 12921137 | T        | G | exonic       | PRAMEF2       | nonsynonymous SNV | PRAMEF2:NM_023014:exon4:c.T928G:p.L310V                                                                                    | NA | NA          | B  |
| chr1 | 12921635 | 12921635 | G        | A | UTR3         | PRAMEF2       | NA                | NA                                                                                                                         | NA | rs144099057 | NA |
| chr1 | 12939692 | 12939692 | G        | A | exonic       | PRAMEF4       | synonymous SNV    | PRAMEF4:NM_001009611:exon4:c.C1110T:p.N370N                                                                                | NA | rs142785237 | NA |
| chr1 | 12939733 | 12939733 | G        | A | exonic       | PRAMEF4       | synonymous SNV    | PRAMEF4:NM_001009611:exon4:c.C1069T:p.L357L                                                                                | NA | rs11578354  | NA |
| chr1 | 12939904 | 12939904 | A        | C | exonic       | PRAMEF4       | nonsynonymous SNV | PRAMEF4:NM_001009611:exon4:c.T898G:p.F300V                                                                                 | NA | rs148317829 | NA |
| chr1 | 12942955 | 12942955 | C        | A | exonic       | PRAMEF4       | synonymous SNV    | PRAMEF4:NM_001009611:exon2:c.G261T:p.L87L                                                                                  | NA | rs11581721  | NA |
| chr1 | 12942963 | 12942963 | C        | T | exonic       | PRAMEF4       | nonsynonymous SNV | PRAMEF4:NM_001009611:exon2:c.G253A:p.D85N                                                                                  | NA | rs200120101 | NA |
| chr1 | 12942981 | 12942981 | C        | T | exonic       | PRAMEF4       | nonsynonymous SNV | PRAMEF4:NM_001009611:exon2:c.G235A:p.A79T                                                                                  | NA | rs199923650 | NA |
| chr1 | 12943042 | 12943042 | C        | T | exonic       | PRAMEF4       | synonymous SNV    | PRAMEF4:NM_001009611:exon2:c.G174A:p.V58V                                                                                  | NA | rs148309168 | NA |
| chr1 | 12954490 | 12954490 | A        | G | exonic       | PRAMEF10      | nonsynonymous SNV | PRAMEF10:NM_001039361:exon3:c.T793C:p.C265R                                                                                | NA | rs149281133 | P  |
| chr1 | 13183213 | 13183213 | T        | A | exonic       | LOC440563     | synonymous SNV    | LOC440563:NM_001136561:exon2:c.A660T:p.S220S                                                                               | NA | rs28373323  | NA |
| chr1 | 13183225 | 13183225 | T        | C | exonic       | LOC440563     | synonymous SNV    | LOC440563:NM_001136561:exon2:c.A648G:p.K216K                                                                               | NA | rs28634306  | NA |
| chr1 | 13183228 | 13183228 | C        | T | exonic       | LOC440563     | synonymous SNV    | LOC440563:NM_001136561:exon2:c.G645A:p.V215V                                                                               | NA | rs144054379 | NA |
| chr1 | 13183833 | 13183833 | C        | T | exonic       | LOC440563     | nonsynonymous SNV | LOC440563:NM_001136561:exon2:c.G40A:p.V14M                                                                                 | NA | rs115597766 | NA |
| chr1 | 13328199 | 13328199 | A        | C | UTR3         | PRAMEF3       | NA                | NA                                                                                                                         | NA | rs56684054  | NA |
| chr1 | 13328239 | 13328239 | C        | A | UTR3         | PRAMEF3       | NA                | NA                                                                                                                         | NA | rs28394386  | NA |
| chr1 | 13328576 | 13328576 | C        | T | UTR3         | PRAMEF3       | NA                | NA                                                                                                                         | NA | rs28538410  | NA |
| chr1 | 13328729 | 13328729 | A        | G | UTR3         | PRAMEF3       | NA                | NA                                                                                                                         | NA | rs60101915  | NA |
| chr1 | 15438826 | 15438839 | GTGTGTGT | - | ncRNA_exonic | TMEM51-AS1    | NA                | NA                                                                                                                         | NA | rs139705142 | NA |
| chr1 | 15546873 | 15546874 | AA       | - | UTR3         | TMEM51        | NA                | NA                                                                                                                         | NA | rs199943887 | NA |
| chr1 | 15911597 | 15911597 | A        | G | UTR5         | AGMAT         | NA                | NA                                                                                                                         | NA | rs6687585   | NA |
| chr1 | 16111413 | 16111413 | C        | - | UTR3         | FBLIM1        | NA                | NA                                                                                                                         | NA | rs149301626 | NA |
| chr1 | 16160955 | 16160955 | T        | - | ncRNA_exonic | FLJ37453      | NA                | NA                                                                                                                         | NA | NA          | NA |
| chr1 | 16162978 | 16162978 | T        | - | ncRNA_exonic | FLJ37453      | NA                | NA                                                                                                                         | NA | NA          | NA |
| chr1 | 16375063 | 16375063 | C        | G | exonic       | CLCNKB        | nonsynonymous SNV | CLCNKB:NM_000085:exon7:c.C641G:p.A214G                                                                                     | NA | rs1889789   | B  |
| chr1 | 16375064 | 16375064 | A        | C | exonic       | CLCNKB        | synonymous SNV    | CLCNKB:NM_000085:exon7:c.A642C:p.A214A                                                                                     | NA | rs1889790   | NA |
| chr1 | 16890441 | 16890441 | C        | T | exonic       | NBPF1         | unknown           | UNKNOWN                                                                                                                    | NA | rs3863779   | NA |

|      |          |          |        |    |              |                    |                      |                                                                |    |             |    |
|------|----------|----------|--------|----|--------------|--------------------|----------------------|----------------------------------------------------------------|----|-------------|----|
| chr1 | 16892249 | 16892249 | T      | G  | exonic       | NBPF1              | unknown              | UNKNOWN                                                        | NA | rs201179082 | NA |
| chr1 | 16905718 | 16905718 | A      | C  | exonic       | NBPF1              | unknown              | UNKNOWN                                                        | NA | rs10909417  | NA |
| chr1 | 16915434 | 16915434 | T      | C  | exonic       | NBPF1              | unknown              | UNKNOWN                                                        | NA | rs202129231 | NA |
| chr1 | 16945236 | 16945239 | TTAT   | -  | ncRNA_exonic | CROCCP2            | NA                   | NA                                                             | NA | NA          | NA |
| chr1 | 16954981 | 16954981 | C      | A  | ncRNA_exonic | CROCCP2            | NA                   | NA                                                             | NA | rs10157498  | NA |
| chr1 | 16974758 | 16974758 | G      | A  | ncRNA_exonic | MST1P2             | NA                   | NA                                                             | NA | rs28484638  | NA |
| chr1 | 16974780 | 16974780 | C      | T  | ncRNA_exonic | MST1P2             | NA                   | NA                                                             | NA | rs28537673  | NA |
| chr1 | 16975005 | 16975005 | C      | T  | ncRNA_exonic | MST1P2             | NA                   | NA                                                             | NA | rs75691517  | NA |
| chr1 | 16975699 | 16975699 | A      | C  | ncRNA_exonic | MST1P2             | NA                   | NA                                                             | NA | rs11488480  | NA |
| chr1 | 17023376 | 17023376 | C      | T  | ncRNA_exonic | ESPNP              | NA                   | NA                                                             | NA | rs613579    | NA |
| chr1 | 17023403 | 17023403 | G      | A  | ncRNA_exonic | ESPNP              | NA                   | NA                                                             | NA | rs10907267  | NA |
| chr1 | 17046549 | 17046549 | G      | A  | ncRNA_exonic | ESPNP              | NA                   | NA                                                             | NA | rs1755332   | NA |
| chr1 | 17046595 | 17046595 | T      | C  | ncRNA_exonic | ESPNP              | NA                   | NA                                                             | NA | rs3856293   | NA |
| chr1 | 17081606 | 17081606 | A      | C  | UTR3         | MST1L              | NA                   | NA                                                             | NA | rs28661960  | NA |
| chr1 | 17081886 | 17081886 | T      | C  | UTR3         | MST1L              | NA                   | NA                                                             | NA | rs12117984  | NA |
| chr1 | 17082229 | 17082229 | G      | C  | UTR3         | MST1L              | NA                   | NA                                                             | NA | rs2610653   | NA |
| chr1 | 17082238 | 17082238 | T      | C  | UTR3         | MST1L              | NA                   | NA                                                             | NA | NA          | NA |
| chr1 | 17082487 | 17082487 | G      | A  | UTR3         | MST1L              | NA                   | NA                                                             | NA | rs180726840 | NA |
| chr1 | 17082779 | 17082779 | A      | G  | UTR3         | MST1L              | NA                   | NA                                                             | NA | NA          | NA |
| chr1 | 17082839 | 17082839 | A      | C  | UTR3         | MST1L              | NA                   | NA                                                             | NA | NA          | NA |
| chr1 | 17083075 | 17083075 | T      | G  | UTR3         | MST1L              | NA                   | NA                                                             | NA | NA          | NA |
| chr1 | 17083119 | 17083119 | A      | T  | UTR3         | MST1L              | NA                   | NA                                                             | NA | NA          | NA |
| chr1 | 17083597 | 17083597 | G      | A  | UTR3         | MST1L              | NA                   | NA                                                             | NA | rs186155999 | NA |
| chr1 | 17083778 | 17083778 | C      | T  | exonic       | MST1L              | synonymous SNV       | MST1L:NM_001271733:exon15:c.G2019A:p.T673T                     | NA | rs28455793  | NA |
| chr1 | 17083888 | 17083888 | C      | T  | exonic       | MST1L              | nonsynonymous SNV    | MST1L:NM_001271733:exon15:c.G1909A:p.G637S                     | NA | rs1071687   | NA |
| chr1 | 17085447 | 17085447 | G      | A  | exonic       | MST1L              | nonsynonymous SNV    | MST1L:NM_001271733:exon10:c.C1244T:p.P415L                     | NA | rs202225848 | NA |
| chr1 | 17085995 | 17085995 | -      | C  | exonic       | MST1L              | frameshift insertion | MST1L:NM_001271733:exon7:c.902_903insG:p.A301fs                | NA | NA          | NA |
| chr1 | 17086085 | 17086085 | -      | C  | exonic       | MST1L              | frameshift insertion | MST1L:NM_001271733:exon7:c.812_813insG:p.A271fs                | NA | rs200532237 | NA |
| chr1 | 17265416 | 17265416 | G      | T  | exonic       | CROCC              | nonsynonymous SNV    | CROCC:NM_014675:exon12:c.G1387T:p.D463Y                        | NA | rs114323849 | D  |
| chr1 | 17299014 | 17299014 | A      | C  | UTR3         | CROCC              | NA                   | NA                                                             | NA | rs6661019   | NA |
| chr1 | 17396592 | 17396592 | G      | A  | exonic       | PADI2              | synonymous SNV       | PADI2:NM_007365:exon15:c.C1755T:p.F585F                        | NA | rs11581590  | NA |
| chr1 | 17674537 | 17674537 | C      | A  | exonic       | PADI4              | synonymous SNV       | PADI4:NM_012387:exon10:c.C1149A:p.R383R                        | NA | rs2240335   | NA |
| chr1 | 18809292 | 18809292 | A      | C  | exonic       | KLHDC7A            | nonsynonymous SNV    | KLHDC7A:NM_152375:exon1:c.A1817C:p.D606A                       | NA | NA          | D  |
| chr1 | 18812479 | 18812479 | A      | -  | UTR3         | KLHDC7A            | NA                   | NA                                                             | NA | rs72275238  | NA |
| chr1 | 19665557 | 19665557 | A      | C  | UTR3         | CAPZB              | NA                   | NA                                                             | NA | NA          | NA |
| chr1 | 19983863 | 19983863 | -      | G  | UTR3         | C1orf151-NBL1,NBL1 | NA                   | NA                                                             | NA | NA          | NA |
| chr1 | 19992066 | 19992066 | T      | C  | UTR5         | HTR6               | NA                   | NA                                                             | NA | rs10917509  | NA |
| chr1 | 19992204 | 19992204 | T      | C  | UTR5         | HTR6               | NA                   | NA                                                             | NA | NA          | NA |
| chr1 | 19992211 | 19992211 | A      | C  | UTR5         | HTR6               | NA                   | NA                                                             | NA | NA          | NA |
| chr1 | 19992219 | 19992219 | A      | C  | UTR5         | HTR6               | NA                   | NA                                                             | NA | NA          | NA |
| chr1 | 19992231 | 19992231 | T      | C  | UTR5         | HTR6               | NA                   | NA                                                             | NA | NA          | NA |
| chr1 | 19992234 | 19992234 | A      | C  | UTR5         | HTR6               | NA                   | NA                                                             | NA | NA          | NA |
| chr1 | 20208984 | 20208984 | G      | T  | UTR5         | OTUD3              | NA                   | NA                                                             | NA | NA          | NA |
| chr1 | 20237881 | 20237881 | -      | T  | UTR3         | OTUD3              | NA                   | NA                                                             | NA | NA          | NA |
| chr1 | 20617419 | 20617419 | T      | C  | UTR5         | VWA5B1             | NA                   | NA                                                             | NA | rs12738826  | NA |
| chr1 | 20671961 | 20671961 | G      | A  | exonic       | VWA5B1             | nonsynonymous SNV    | VWA5B1:NM_001039500:exon17:c.G2639A:p.R880H                    | NA | rs11582960  | NA |
| chr1 | 20978415 | 20978415 | T      | G  | UTR3         | DDOST              | NA                   | NA                                                             | NA | rs150466875 | NA |
| chr1 | 21766776 | 21766776 | G      | C  | UTR5         | NBPF3              | NA                   | NA                                                             | NA | rs113548640 | NA |
| chr1 | 21808223 | 21808223 | T      | C  | exonic       | NBPF3              | synonymous SNV       | 57C:p.L453L,NBPF3:NM_001256416:exon13:c.T1531C:p.L511L,NBPF3:I | NA | rs145079058 | NA |
| chr1 | 22160042 | 22160042 | T      | G  | exonic       | HSPG2              | synonymous SNV       | HSPG2:NM_005529:exon79:c.A10896C:p.R3632R                      | NA | NA          | NA |
| chr1 | 22357521 | 22357526 | TTTTTT | -  | ncRNA_exonic | LINC00339          | NA                   | NA                                                             | NA | NA          | NA |
| chr1 | 22445719 | 22445719 | G      | -  | UTR3         | WNT4               | NA                   | NA                                                             | NA | NA          | NA |
| chr1 | 22445721 | 22445721 | G      | -  | UTR3         | WNT4               | NA                   | NA                                                             | NA | NA          | NA |
| chr1 | 23695593 | 23695593 | -      | G  | ncRNA_exonic | C1orf213           | NA                   | NA                                                             | NA | NA          | NA |
| chr1 | 23695637 | 23695637 | T      | G  | ncRNA_exonic | C1orf213           | NA                   | NA                                                             | NA | NA          | NA |
| chr1 | 23695642 | 23695642 | C      | G  | ncRNA_exonic | C1orf213           | NA                   | NA                                                             | NA | NA          | NA |
| chr1 | 23695644 | 23695644 | T      | G  | ncRNA_exonic | C1orf213           | NA                   | NA                                                             | NA | NA          | NA |
| chr1 | 23695669 | 23695669 | T      | C  | ncRNA_exonic | C1orf213           | NA                   | NA                                                             | NA | NA          | NA |
| chr1 | 23695680 | 23695680 | C      | G  | ncRNA_exonic | C1orf213           | NA                   | NA                                                             | NA | NA          | NA |
| chr1 | 23695687 | 23695687 | T      | C  | ncRNA_exonic | C1orf213           | NA                   | NA                                                             | NA | NA          | NA |
| chr1 | 23886300 | 23886300 | C      | -  | upstream     | ID3                | NA                   | NA                                                             | NA | rs139377135 | NA |
| chr1 | 24296853 | 24296853 | -      | TT | UTR3         | SRSF10             | NA                   | NA                                                             | NA | NA          | NA |
| chr1 | 24798068 | 24798068 | -      | A  | UTR3         | NIPAL3             | NA                   | NA                                                             | NA | rs35468932  | NA |
| chr1 | 24798499 | 24798500 | TT     | -  | UTR3         | NIPAL3             | NA                   | NA                                                             | NA | rs148414271 | NA |
| chr1 | 24999676 | 24999676 | -      | T  | UTR3         | SRRM1              | NA                   | NA                                                             | NA | rs113632210 | NA |
| chr1 | 25747230 | 25747230 | G      | C  | exonic       | RHCE               | nonsynonymous SNV    | NM_138616:exon1:c.C48G;p.C16W,RHCE:NM_138617:exon1:c.C48G;p    | NA | rs201634828 | B  |

|      |          |          |          |       |              |                             |                   |                                                                                                |    |             |    |
|------|----------|----------|----------|-------|--------------|-----------------------------|-------------------|------------------------------------------------------------------------------------------------|----|-------------|----|
| chr1 | 26143704 | 26143704 | -        | TTTTG | UTR3         | SEPN1                       | NA                | NA                                                                                             | NA | rs3033477   | NA |
| chr1 | 26211187 | 26211188 | AA       | -     | UTR3         | STMN1                       | NA                | NA                                                                                             | NA | NA          | NA |
| chr1 | 26487940 | 26487940 | A        | G     | exonic       | FAM110D                     | nonsynonymous SNV | FAM110D:NM_024869:exon2:c.A158G:p.H53R                                                         | NA | rs3748856   | D  |
| chr1 | 26488883 | 26488883 | G        | T     | UTR3         | FAM110D                     | NA                | NA                                                                                             | NA | NA          | NA |
| chr1 | 26627478 | 26627478 | T        | C     | exonic       | UBXN11                      | synonymous SNV    | l_001077262:exon4:c.A138G:p.S46S,UBXN11:NM_183008:exon5:c.A1                                   | NA | rs2276712   | NA |
| chr1 | 26786627 | 26786627 | G        | A     | exonic       | DHDDS                       | nonsynonymous SNV | l_001243565:exon7:c.G640A:p.V214M,DHDDS:NM_024887:exon8:c.G=COSM146454;OCCURENCE=1(stomac      | NA | rs3816539   | B  |
| chr1 | 26801737 | 26801737 | -        | T     | UTR3         | HMG2                        | NA                | NA                                                                                             | NA | NA          | NA |
| chr1 | 27107651 | 27107651 | A        | -     | UTR3         | ARID1A                      | NA                | NA                                                                                             | NA | NA          | NA |
| chr1 | 27190821 | 27190821 | -        | GT    | UTR3         | SFN                         | NA                | NA                                                                                             | NA | rs3065004   | NA |
| chr1 | 28475837 | 28475838 | TT       | -     | UTR3         | PTAFR                       | NA                | NA                                                                                             | NA | NA          | NA |
| chr1 | 31838552 | 31838552 | A        | -     | UTR3         | FABP3                       | NA                | NA                                                                                             | NA | NA          | NA |
| chr1 | 31907249 | 31907249 | T        | C     | UTR3         | SERINC2                     | NA                | NA                                                                                             | NA | NA          | NA |
| chr1 | 32673866 | 32673866 | G        | C     | UTR3         | IQCC                        | NA                | NA                                                                                             | NA | rs41302746  | NA |
| chr1 | 33148362 | 33148362 | -        | CT    | UTR3         | RBBP4                       | NA                | NA                                                                                             | NA | rs5773380   | NA |
| chr1 | 33148866 | 33148867 | AA       | -     | UTR3         | RBBP4                       | NA                | NA                                                                                             | NA | rs148907756 | NA |
| chr1 | 33475531 | 33475531 | A        | T     | UTR3         | AK2                         | NA                | NA                                                                                             | NA | NA          | NA |
| chr1 | 33475556 | 33475556 | A        | C     | UTR3         | AK2                         | NA                | NA                                                                                             | NA | rs201880820 | NA |
| chr1 | 33475767 | 33475767 | G        | A     | UTR3         | AK2                         | NA                | NA                                                                                             | NA | rs74066436  | NA |
| chr1 | 33475791 | 33475791 | A        | G     | UTR3         | AK2                         | NA                | NA                                                                                             | NA | rs6884      | NA |
| chr1 | 33764916 | 33764916 | A        | C     | UTR3         | ZNF362                      | NA                | NA                                                                                             | NA | NA          | NA |
| chr1 | 35220730 | 35220730 | A        | G     | UTR5         | GJB5                        | NA                | NA                                                                                             | NA | rs2275229   | NA |
| chr1 | 36032231 | 36032232 | CA       | -     | UTR3         | NCDN                        | NA                | NA                                                                                             | NA | NA          | NA |
| chr1 | 36770048 | 36770048 | T        | -     | UTR3         | THRAP3                      | NA                | NA                                                                                             | NA | NA          | NA |
| chr1 | 36770065 | 36770065 | C        | T     | UTR3         | THRAP3                      | NA                | NA                                                                                             | NA | rs75716416  | NA |
| chr1 | 38226777 | 38226777 | C        | A     | UTR3         | EPHA10                      | NA                | NA                                                                                             | NA | rs116544770 | NA |
| chr1 | 38327409 | 38327409 | G        | A     | UTR3         | INPP5B                      | NA                | NA                                                                                             | NA | NA          | NA |
| chr1 | 38423061 | 38423061 | C        | T     | UTR3         | SF3A3                       | NA                | NA                                                                                             | NA | rs28667771  | NA |
| chr1 | 38490065 | 38490065 | A        | T     | UTR3         | UTP11L                      | NA                | NA                                                                                             | NA | NA          | NA |
| chr1 | 38510268 | 38510268 | T        | -     | UTR3         | POU3F1                      | NA                | NA                                                                                             | NA | rs5773610   | NA |
| chr1 | 39340002 | 39340002 | A        | T     | ncRNA_exonic | GJA9-MYCBP                  | NA                | NA                                                                                             | NA | rs66539868  | NA |
| chr1 | 39470979 | 39470979 | -        | A     | UTR3         | AKIRIN1                     | NA                | NA                                                                                             | NA | NA          | NA |
| chr1 | 39796845 | 39796855 | TTTTTTTT | -     | intronic     | MACF1                       | NA                | NA                                                                                             | NA | rs201626891 | NA |
| chr1 | 39835817 | 39835817 | A        | G     | exonic       | MACF1                       | nonsynonymous SNV | MACF1:NM_012090:exon47:c.A6868G:p.M2290V                                                       | NA | rs2296172   | B  |
| chr1 | 40089595 | 40089595 | C        | T     | UTR3         | HEYL                        | NA                | NA                                                                                             | NA | rs12030495  | NA |
| chr1 | 40235448 | 40235448 | C        | T     | exonic       | OXCT2                       | nonsynonymous SNV | OXCT2:NM_022120:exon1:c.G1480A:p.D494N                                                         | NA | rs150795467 | P  |
| chr1 | 43232997 | 43232997 | C        | A     | exonic       | C1orf50                     | synonymous SNV    | C1orf50:NM_024097:exon1:c.C15A:p.A5A                                                           | NA | rs193038877 | NA |
| chr1 | 43233201 | 43233201 | C        | A     | exonic       | C1orf50                     | nonsynonymous SNV | C1orf50:NM_024097:exon2:c.C101A:p.P34Q                                                         | NA | NA          | P  |
| chr1 | 43272824 | 43272824 | -        | TT    | UTR3         | CCDC23                      | NA                | NA                                                                                             | NA | NA          | NA |
| chr1 | 43649508 | 43649508 | A        | G     | exonic       | WDR65                       | nonsynonymous SNV | lG:p.N241D,WDR65:NM_001195831:exon4:c.A721G:p.N241D,WDR65                                      | NA | rs663824    | B  |
| chr1 | 44084739 | 44084739 | C        | T     | exonic       | PTPRF                       | synonymous SNV    | l30440:exon26:c.C4485T:p.R1495R,PTPRF:NM_002840:exon27:c.C451                                  | NA | rs1143701   | NA |
| chr1 | 45444038 | 45444038 | G        | A     | exonic       | EIF2B3                      | synonymous SNV    | 243T:p.D81D,EIF2B3:NM_001261418:exon3:c.C243T:p.D81D,EIF2B3:N                                  | NA | rs11556200  | NA |
| chr1 | 47099235 | 47099235 | A        | C     | intergenic   | 3C(dist=16672),ATPAF1(dist= | NA                | NA                                                                                             | NA | rs4660950   | NA |
| chr1 | 47905783 | 47905783 | T        | -     | UTR3         | FOX2                        | NA                | NA                                                                                             | NA | NA          | NA |
| chr1 | 51204557 | 51204557 | G        | A     | exonic       | FAF1                        | nonsynonymous SNV | FAF1:NM_007051:exon6:c.C529T:p.P177S                                                           | NA | rs140027012 | B  |
| chr1 | 51820325 | 51820325 | C        | T     | UTR3         | EPS15                       | NA                | NA                                                                                             | NA | rs11554033  | NA |
| chr1 | 52520859 | 52520861 | ACA      | -     | UTR5         | TXNDC12                     | NA                | NA                                                                                             | NA | rs142834436 | NA |
| chr1 | 53289190 | 53289190 | -        | T     | UTR3         | ZYG11B                      | NA                | NA                                                                                             | NA | NA          | NA |
| chr1 | 53291326 | 53291327 | AA       | -     | UTR3         | ZYG11B                      | NA                | NA                                                                                             | NA | NA          | NA |
| chr1 | 53537266 | 53537266 | G        | A     | exonic       | PODN                        | synonymous SNV    | cp.T172T,PODN:NM_001199081:exon4:c.G459A:p.T153T,PODN:NM_C                                     | NA | rs1769316   | NA |
| chr1 | 53662140 | 53662140 | G        | T     | UTR5         | CPT2                        | NA                | NA                                                                                             | NA | NA          | NA |
| chr1 | 53712557 | 53712557 | -        | A     | UTR3         | LRP8                        | NA                | NA                                                                                             | NA | NA          | NA |
| chr1 | 53930360 | 53930360 | G        | A     | exonic       | DMRTB1                      | synonymous SNV    | DMRTB1:NM_033067:exon3:c.G801A:p.P267P                                                         | NA | rs61738842  | NA |
| chr1 | 54199823 | 54199823 | G        | T     | UTR5         | GLIS1                       | NA                | NA                                                                                             | NA | NA          | NA |
| chr1 | 54681920 | 54681920 | G        | C     | exonic       | MRPL37                      | nonsynonymous SNV | MRPL37:NM_016491:exon6:c.G1097C:p.C366S                                                        | NA | rs13571     | B  |
| chr1 | 57179398 | 57179398 | T        | -     | UTR3         | PRKAA2                      | NA                | NA                                                                                             | NA | rs143795464 | NA |
| chr1 | 58971831 | 58971831 | G        | A     | exonic       | OMA1                        | synonymous SNV    | OMA1:NM_145243:exon8:c.C1266T:p.F422F                                                          | NA | rs3087585   | NA |
| chr1 | 59247323 | 59247323 | T        | C     | UTR3         | JUN                         | NA                | NA                                                                                             | NA | NA          | NA |
| chr1 | 60280750 | 60280750 | T        | -     | UTR5         | HOOK1                       | NA                | NA                                                                                             | NA | rs113730234 | NA |
| chr1 | 60466814 | 60466814 | T        | C     | exonic       | C1orf87                     | nonsynonymous SNV | C1orf87:NM_152377:exon10:c.A1207G:p.K403E                                                      | NA | rs626251    | B  |
| chr1 | 61921185 | 61921185 | -        | T     | UTR3         | NFIA                        | NA                | NA                                                                                             | NA | rs111405657 | NA |
| chr1 | 61924354 | 61924354 | G        | T     | UTR3         | NFIA                        | NA                | NA                                                                                             | NA | NA          | NA |
| chr1 | 61927697 | 61927697 | T        | -     | UTR3         | NFIA                        | NA                | NA                                                                                             | NA | NA          | NA |
| chr1 | 61927742 | 61927742 | C        | T     | UTR3         | NFIA                        | NA                | NA                                                                                             | NA | NA          | NA |
| chr1 | 62627004 | 62627007 | TTTT     | -     | UTR3         | INADL                       | NA                | NA                                                                                             | NA | NA          | NA |
| chr1 | 62676612 | 62676612 | A        | G     | exonic       | L1TD1                       | synonymous SNV    | J19079:exon4:c.A2166G:p.K722K,L1TD1:NM_001164835:exon5:c.A21(SM118430;OCCURENCE=1(ovary),1(sto | NA | rs66958136  | NA |
| chr1 | 62960101 | 62960101 | A        | G     | exonic       | DOCK7                       | synonymous SNV    | J1272001:exon39:c.T4942C:p.L1648L,DOCK7:NM_033407:exon39:c.T4                                  | NA | rs10889335  | NA |



|      |          |          |          |    |              |           |                   |                                                                                             |                                    |             |    |
|------|----------|----------|----------|----|--------------|-----------|-------------------|---------------------------------------------------------------------------------------------|------------------------------------|-------------|----|
| chr1 | 64036764 | 64036764 | A        | G  | exonic       | EFCAB7    | nonsynonymous SNV | EFCAB7:NM_032437:exon13:c.A1780G:p.I594V                                                    | NA                                 | rs199608136 | B  |
| chr1 | 64644708 | 64644708 | A        | -  | UTR3         | ROR1      | NA                | NA                                                                                          | NA                                 | rs10709706  | NA |
| chr1 | 66831370 | 66831370 | G        | A  | exonic       | PDE4B     | synonymous SNV    | 1037340:exon11:c.G1260A:p.E420E,PDE4B:NM_001037341:exon13:c.G1260A:p.E420E                  | NA                                 | rs783036    | NA |
| chr1 | 67288175 | 67288175 | C        | A  | exonic       | WDR78     | nonsynonymous SNV | WDR78:NM_024763:exon16:c.G2365T:p.A789S                                                     | NA                                 | NA          | B  |
| chr1 | 67303303 | 67303303 | A        | G  | UTR3         | WDR78     | NA                | NA                                                                                          | NA                                 | rs6698076   | NA |
| chr1 | 67557966 | 67557966 | G        | T  | UTR3         | C1orf141  | NA                | NA                                                                                          | NA                                 | rs6672194   | NA |
| chr1 | 72748272 | 72748272 | A        | C  | UTR5         | NEGR1     | NA                | NA                                                                                          | NA                                 | NA          | NA |
| chr1 | 76190216 | 76190216 | G        | A  | UTR5         | ACADM     | NA                | NA                                                                                          | NA                                 | rs17848068  | NA |
| chr1 | 78343510 | 78343510 | C        | T  | UTR3         | FAM73A    | NA                | NA                                                                                          | NA                                 | rs55760347  | NA |
| chr1 | 78602292 | 78602292 | C        | T  | UTR3         | GIPC2     | NA                | NA                                                                                          | NA                                 | NA          | NA |
| chr1 | 78602292 | 78602292 | -        | TT | UTR3         | GIPC2     | NA                | NA                                                                                          | NA                                 | NA          | NA |
| chr1 | 79108070 | 79108070 | A        | -  | UTR3         | IFI44L    | NA                | NA                                                                                          | NA                                 | NA          | NA |
| chr1 | 85462582 | 85462582 | C        | G  | UTR5         | MCOLN2    | NA                | NA                                                                                          | NA                                 | rs11161503  | NA |
| chr1 | 85462652 | 85462652 | G        | T  | UTR5         | MCOLN2    | NA                | NA                                                                                          | NA                                 | rs11161504  | NA |
| chr1 | 85462665 | 85462665 | T        | G  | UTR5         | MCOLN2    | NA                | NA                                                                                          | NA                                 | rs11161505  | NA |
| chr1 | 85743584 | 85743584 | C        | -  | ncRNA_exonic | LOC646626 | NA                | NA                                                                                          | NA                                 | rs201121966 | NA |
| chr1 | 86119296 | 86119296 | C        | A  | UTR3         | ZNHIT6    | NA                | NA                                                                                          | NA                                 | rs821399    | NA |
| chr1 | 89225976 | 89225976 | T        | C  | exonic       | PKN2      | synonymous SNV    | PKN2:NM_006256:exon3:c.T421C:p.L141L                                                        | NA                                 | rs430600    | NA |
| chr1 | 89449616 | 89449616 | G        | C  | UTR5         | RBMXL1    | NA                | NA                                                                                          | NA                                 | NA          | NA |
| chr1 | 89726090 | 89726090 | -        | G  | UTR3         | GBP5      | NA                | NA                                                                                          | NA                                 | rs140412648 | NA |
| chr1 | 93620393 | 93620393 | G        | A  | exonic       | TMED5     | nonsynonymous SNV | TMED5:NM_016040:exon4:c.C524T:p.T175I                                                       | NA                                 | rs1060622   | D  |
| chr1 | 93811569 | 93811569 | A        | G  | UTR5         | DR1       | NA                | NA                                                                                          | NA                                 | rs10782959  | NA |
| chr1 | 94353029 | 94353029 | -        | T  | UTR3         | GCLM      | NA                | NA                                                                                          | NA                                 | rs146547212 | NA |
| chr1 | 94995630 | 94995632 | AAA      | -  | UTR3         | F3        | NA                | NA                                                                                          | NA                                 | rs58927022  | NA |
| chr1 | 95362928 | 95362929 | AA       | -  | UTR3         | CNN3      | NA                | NA                                                                                          | NA                                 | rs58217295  | NA |
| chr1 | 95363001 | 95363001 | T        | C  | UTR3         | CNN3      | NA                | NA                                                                                          | NA                                 | rs3789699   | NA |
| chr1 | 95657855 | 95657855 | A        | -  | UTR3         | TMEM56    | NA                | NA                                                                                          | NA                                 | NA          | NA |
| chr1 | 97279218 | 97279223 | TTTTTT   | -  | UTR3         | PTBP2     | NA                | NA                                                                                          | NA                                 | NA          | NA |
| chr1 | 97770920 | 97770920 | C        | T  | exonic       | DPYD      | nonsynonymous SNV | DPYD:NM_000110:exon18:c.G2194A:p.V732I                                                      | NA                                 | rs1801160   | D  |
| chr1 | 1.01E+08 | 1.01E+08 | A        | -  | UTR3         | SASS6     | NA                | NA                                                                                          | NA                                 | NA          | NA |
| chr1 | 1.01E+08 | 1.01E+08 | A        | -  | UTR3         | DBT       | NA                | NA                                                                                          | NA                                 | rs71709231  | NA |
| chr1 | 1.01E+08 | 1.01E+08 | ACACACAC | -  | UTR3         | DBT       | NA                | NA                                                                                          | NA                                 | rs140341302 | NA |
| chr1 | 1.03E+08 | 1.03E+08 | G        | A  | exonic       | COL11A1   | nonsynonymous SNV | COL11A1:NM_001190709:exon51:c.C3851T:p.P1284L,COL11A1:NM_001190709:exon51:c.C3851T:p.P1284L | NA                                 | rs3753841   | NA |
| chr1 | 1.04E+08 | 1.04E+08 | C        | G  | exonic       | AMY2A     | synonymous SNV    | AMY2A:NM_000699:exon5:c.C834G:p.G278G                                                       | NA                                 | rs201666814 | NA |
| chr1 | 1.04E+08 | 1.04E+08 | G        | A  | exonic       | AMY2A     | nonsynonymous SNV | AMY2A:NM_000699:exon5:c.G838A:p.V280I                                                       | NA                                 | rs141685988 | B  |
| chr1 | 1.09E+08 | 1.09E+08 | G        | A  | exonic       | NBPF4     | synonymous SNV    | NBPF4:NM_001143989:exon14:c.C1869T:p.S623S                                                  | OSM893345;OCCURENCE=2(endometrium) | rs2582071   | NA |
| chr1 | 1.09E+08 | 1.09E+08 | C        | T  | UTR3         | FAM102B   | NA                | NA                                                                                          | NA                                 | NA          | NA |
| chr1 | 1.09E+08 | 1.09E+08 | G        | T  | UTR3         | FAM102B   | NA                | NA                                                                                          | NA                                 | NA          | NA |
| chr1 | 1.1E+08  | 1.1E+08  | T        | C  | UTR5         | C1orf194  | NA                | NA                                                                                          | NA                                 | rs536176    | NA |
| chr1 | 1.1E+08  | 1.1E+08  | AAA      | -  | UTR3         | KIAA1324  | NA                | NA                                                                                          | NA                                 | rs149143656 | NA |
| chr1 | 1.1E+08  | 1.1E+08  | A        | C  | exonic       | AMIGO1    | synonymous SNV    | AMIGO1:NM_020703:exon2:c.T1356G:p.G452G                                                     | NA                                 | NA          | NA |
| chr1 | 1.1E+08  | 1.1E+08  | C        | T  | UTR5         | GNAI3     | NA                | NA                                                                                          | NA                                 | rs3737182   | NA |
| chr1 | 1.1E+08  | 1.1E+08  | G        | A  | exonic       | AMPD2     | nonsynonymous SNV | AMPD2:NM_001257360:exon2:c.G2140A:p.V709M                                                   | NA                                 | rs28362581  | B  |
| chr1 | 1.11E+08 | 1.11E+08 | -        | C  | UTR5         | AHCYL1    | NA                | NA                                                                                          | NA                                 | rs11424431  | NA |
| chr1 | 1.11E+08 | 1.11E+08 | G        | A  | UTR5         | AHCYL1    | NA                | NA                                                                                          | NA                                 | rs17551493  | NA |
| chr1 | 1.11E+08 | 1.11E+08 | A        | -  | UTR3         | AHCYL1    | NA                | NA                                                                                          | NA                                 | NA          | NA |
| chr1 | 1.11E+08 | 1.11E+08 | A        | C  | exonic       | SLC6A17   | nonsynonymous SNV | SLC6A17:NM_001010898:exon12:c.A2164C:p.T722P                                                | NA                                 | NA          | NA |
| chr1 | 1.11E+08 | 1.11E+08 | A        | G  | UTR3         | SLC6A17   | NA                | NA                                                                                          | NA                                 | rs12133992  | NA |
| chr1 | 1.11E+08 | 1.11E+08 | C        | A  | UTR3         | SLC6A17   | NA                | NA                                                                                          | NA                                 | NA          | NA |
| chr1 | 1.11E+08 | 1.11E+08 | G        | A  | UTR3         | SLC16A4   | NA                | NA                                                                                          | NA                                 | rs185712869 | NA |
| chr1 | 1.11E+08 | 1.11E+08 | -        | CA | UTR3         | LRIF1     | NA                | NA                                                                                          | NA                                 | NA          | NA |
| chr1 | 1.12E+08 | 1.12E+08 | C        | G  | exonic       | OVGP1     | nonsynonymous SNV | OVGP1:NM_002557:exon11:c.G1561C:p.E521Q                                                     | NA                                 | rs201662631 | B  |
| chr1 | 1.12E+08 | 1.12E+08 | C        | T  | exonic       | OVGP1     | synonymous SNV    | OVGP1:NM_002557:exon11:c.G1560A:p.G520G                                                     | NA                                 | NA          | NA |
| chr1 | 1.12E+08 | 1.12E+08 | G        | C  | exonic       | OVGP1     | nonsynonymous SNV | OVGP1:NM_002557:exon11:c.C1553G:p.T518S                                                     | NA                                 | rs45455292  | B  |
| chr1 | 1.12E+08 | 1.12E+08 | A        | G  | exonic       | OVGP1     | nonsynonymous SNV | OVGP1:NM_002557:exon11:c.T1540C:p.Y514H                                                     | NA                                 | rs1126656   | B  |
| chr1 | 1.12E+08 | 1.12E+08 | A        | G  | exonic       | OVGP1     | nonsynonymous SNV | OVGP1:NM_002557:exon11:c.T1531C:p.S511P                                                     | NA                                 | rs56294468  | B  |
| chr1 | 1.13E+08 | 1.13E+08 | T        | G  | exonic       | ST7L      | synonymous SNV    | ST7L:NM_001138727:exon7:c.A672C:p.L224L,ST7L:NM_001138728:exon7:c.A723C:p.L224L             | NA                                 | NA          | NA |
| chr1 | 1.13E+08 | 1.13E+08 | T        | -  | UTR3         | CAP2A1    | NA                | NA                                                                                          | NA                                 | NA          | NA |
| chr1 | 1.15E+08 | 1.15E+08 | T        | C  | exonic       | BCAS2     | nonsynonymous SNV | BCAS2:NM_005872:exon1:c.A89G:p.E30G                                                         | NA                                 | NA          | D  |
| chr1 | 1.15E+08 | 1.15E+08 | C        | A  | exonic       | BCAS2     | nonsynonymous SNV | BCAS2:NM_005872:exon1:c.G58T:p.D20Y                                                         | NA                                 | NA          | D  |
| chr1 | 1.15E+08 | 1.15E+08 | T        | C  | exonic       | BCAS2     | synonymous SNV    | BCAS2:NM_005872:exon1:c.A27G:p.G9G                                                          | NA                                 | NA          | NA |
| chr1 | 1.15E+08 | 1.15E+08 | G        | A  | UTR5         | CSDE1     | NA                | NA                                                                                          | NA                                 | rs41274132  | NA |
| chr1 | 1.15E+08 | 1.15E+08 | T        | C  | exonic       | SIKE1     | nonsynonymous SNV | SIKE1:NM_025073:exon1:c.A142G:p.T48A,SIKE1:NM_025073:exon1:c.A142G:p.T48A                   | NA                                 | NA          | B  |
| chr1 | 1.16E+08 | 1.16E+08 | -        | TA | UTR3         | TSPAN2    | NA                | NA                                                                                          | NA                                 | rs34617679  | NA |
| chr1 | 1.17E+08 | 1.17E+08 | C        | G  | exonic       | IGSF3     | nonsynonymous SNV | IGSF3:NM_001007237:exon5:c.G1050C:p.K350N,IGSF3:NM_001007237:exon5:c.G1050C:p.K350N         | NA                                 | rs140699309 | B  |
| chr1 | 1.17E+08 | 1.17E+08 | C        | T  | exonic       | IGSF3     | nonsynonymous SNV | IGSF3:NM_001007237:exon3:c.G214A:p.V72I,IGSF3:NM_001007237:exon3:c.G214A:p.V72I             | NA                                 | rs201676764 | B  |

|      |          |          |          |     |              |             |                   |                                                                                               |                                   |             |    |
|------|----------|----------|----------|-----|--------------|-------------|-------------------|-----------------------------------------------------------------------------------------------|-----------------------------------|-------------|----|
| chr1 | 1.17E+08 | 1.17E+08 | C        | T   | exonic       | IGSF3       | synonymous SNV    | 4_001007237:exon3:c.G189A:p.S63S,IGSF3:NM_001542:exon3:c.G189                                 | NA                                | rs200177381 | NA |
| chr1 | 1.17E+08 | 1.17E+08 | C        | T   | exonic       | IGSF3       | synonymous SNV    | M_001007237:exon3:c.G99A:p.T33T,IGSF3:NM_001542:exon3:c.G99A#8218,COSM288219;OCCURENCE=3(larg | rs201692914                       | NA          | NA |
| chr1 | 1.18E+08 | 1.18E+08 | GGCGGCGC | -   | UTR5         | MAN1A2      | NA                | NA                                                                                            | NA                                | NA          | NA |
| chr1 | 1.18E+08 | 1.18E+08 | ATTT     | -   | UTR3         | FAM46C      | NA                | NA                                                                                            | NA                                | rs34914954  | NA |
| chr1 | 1.19E+08 | 1.19E+08 | -        | A   | UTR3         | TBX15       | NA                | NA                                                                                            | NA                                | NA          | NA |
| chr1 | 1.21E+08 | 1.21E+08 | T        | A   | exonic       | NOTCH2      | nonsynonymous SNV | _001200001:exon4:c.A703T:p.T235S,NOTCH2:NM_024408:exon4:c.A7                                  | NA                                | rs200464440 | D  |
| chr1 | 1.21E+08 | 1.21E+08 | G        | T   | exonic       | NOTCH2      | nonsynonymous SNV | _001200001:exon4:c.C680A:p.P227H,NOTCH2:NM_024408:exon4:c.C6                                  | NA                                | rs3899528   | D  |
| chr1 | 1.21E+08 | 1.21E+08 | C        | G   | UTR5         | NOTCH2      | NA                | NA                                                                                            | NA                                | rs79247096  | NA |
| chr1 | 1.21E+08 | 1.21E+08 | C        | T   | exonic       | FAM72B      | nonsynonymous SNV | FAM72B:NM_001100910:exon3:c.C281T:p.P94L                                                      | NA                                | rs1572701   | B  |
| chr1 | 1.45E+08 | 1.45E+08 | A        | G   | UTR5         | NBPF8,NBPF9 | NA                | NA                                                                                            | NA                                | rs201543878 | NA |
| chr1 | 1.45E+08 | 1.45E+08 | T        | C   | UTR5         | NBPF8,NBPF9 | NA                | NA                                                                                            | NA                                | rs199745076 | NA |
| chr1 | 1.45E+08 | 1.45E+08 | G        | A   | exonic       | NBPF8,NBPF9 | unknown           | UNKNOWN                                                                                       | NA                                | rs200319336 | NA |
| chr1 | 1.45E+08 | 1.45E+08 | G        | T   | exonic       | NBPF8,NBPF9 | unknown           | UNKNOWN                                                                                       | 191623;OCCURENCE=1(central_nervou | NA          | NA |
| chr1 | 1.45E+08 | 1.45E+08 | A        | T   | UTR3         | PDE4DIP     | NA                | NA                                                                                            | NA                                | rs141695068 | NA |
| chr1 | 1.45E+08 | 1.45E+08 | T        | C   | UTR3         | SEC22B      | NA                | NA                                                                                            | NA                                | rs7550440   | NA |
| chr1 | 1.45E+08 | 1.45E+08 | G        | C   | exonic       | NBPF10      | nonsynonymous SNV | NBPF10:NM_001039703:exon1:c.G85C:p.A29P                                                       | NA                                | rs6671335   | NA |
| chr1 | 1.45E+08 | 1.45E+08 | G        | C   | exonic       | NBPF10      | nonsynonymous SNV | NBPF10:NM_001039703:exon1:c.G93C:p.K31N                                                       | NA                                | rs4409714   | NA |
| chr1 | 1.48E+08 | 1.48E+08 | T        | C   | UTR3         | NBPF14      | NA                | NA                                                                                            | NA                                | rs16826730  | NA |
| chr1 | 1.48E+08 | 1.48E+08 | G        | A   | UTR3         | NBPF14      | NA                | NA                                                                                            | NA                                | rs3961381   | NA |
| chr1 | 1.48E+08 | 1.48E+08 | T        | C   | exonic       | NBPF14      | synonymous SNV    | NBPF14:NM_015383:exon22:c.A2766G:p.X922X                                                      | NA                                | rs79370452  | NA |
| chr1 | 1.48E+08 | 1.48E+08 | T        | C   | exonic       | NBPF14      | synonymous SNV    | NBPF14:NM_015383:exon5:c.A603G:p.G201G                                                        | NA                                | NA          | NA |
| chr1 | 1.49E+08 | 1.49E+08 | T        | C   | exonic       | PPIAL4E     | synonymous SNV    | PPIAL4E:NM_001144032:exon1:c.T345C:p.C115C                                                    | NA                                | rs372485    | NA |
| chr1 | 1.49E+08 | 1.49E+08 | T        | C   | UTR3         | NBPF16      | NA                | NA                                                                                            | NA                                | rs78259445  | NA |
| chr1 | 1.49E+08 | 1.49E+08 | G        | A   | ncRNA_exonic | LOC388692   | NA                | NA                                                                                            | NA                                | rs3926814   | NA |
| chr1 | 1.49E+08 | 1.49E+08 | A        | G   | ncRNA_exonic | LOC388692   | NA                | NA                                                                                            | NA                                | rs139360823 | NA |
| chr1 | 1.49E+08 | 1.49E+08 | T        | C   | ncRNA_exonic | LOC388692   | NA                | NA                                                                                            | NA                                | rs149624901 | NA |
| chr1 | 1.49E+08 | 1.49E+08 | T        | C   | ncRNA_exonic | LOC388692   | NA                | NA                                                                                            | NA                                | rs593054    | NA |
| chr1 | 1.49E+08 | 1.49E+08 | -        | A   | ncRNA_exonic | LOC388692   | NA                | NA                                                                                            | NA                                | NA          | NA |
| chr1 | 1.5E+08  | 1.5E+08  | -        | CCG | UTR5         | RPRD2       | NA                | NA                                                                                            | NA                                | NA          | NA |
| chr1 | 1.5E+08  | 1.5E+08  | A        | -   | UTR3         | RPRD2       | NA                | NA                                                                                            | NA                                | NA          | NA |
| chr1 | 1.51E+08 | 1.51E+08 | G        | A   | exonic       | CTSS        | nonsynonymous SNV | CTSS:NM_004079:exon4:c.C337T:p.R113W                                                          | )=COSM146600;OCCURENCE=1(stomac   | rs2230061   | B  |
| chr1 | 1.52E+08 | 1.52E+08 | A        | G   | UTR3         | RIIAD1      | NA                | NA                                                                                            | NA                                | rs41263712  | NA |
| chr1 | 1.52E+08 | 1.52E+08 | T        | C   | UTR3         | THEM4       | NA                | NA                                                                                            | NA                                | rs74997792  | NA |
| chr1 | 1.52E+08 | 1.52E+08 | C        | G   | exonic       | TCHH        | nonsynonymous SNV | TCHH:NM_007113:exon3:c.G3436C:p.V1146L                                                        | NA                                | NA          | NA |
| chr1 | 1.52E+08 | 1.52E+08 | T        | C   | exonic       | TCHH        | nonsynonymous SNV | TCHH:NM_007113:exon3:c.A3244G:p.K1082E                                                        | :OSM895998;OCCURENCE=1(endometr   | rs199978971 | NA |
| chr1 | 1.52E+08 | 1.52E+08 | A        | C   | exonic       | TCHH        | nonsynonymous SNV | TCHH:NM_007113:exon3:c.T3128G:p.L1043R                                                        | ID=COSM528874;OCCURENCE=1(lung)   | NA          | NA |
| chr1 | 1.52E+08 | 1.52E+08 | A        | G   | exonic       | HRNR        | synonymous SNV    | HRNR:NM_001009931:exon3:c.T6243C:p.Y2081Y                                                     | NA                                | rs143217581 | NA |
| chr1 | 1.52E+08 | 1.52E+08 | G        | A   | exonic       | HRNR        | nonsynonymous SNV | HRNR:NM_001009931:exon3:c.C5642T:p.S1881F                                                     | NA                                | rs61814941  | NA |
| chr1 | 1.52E+08 | 1.52E+08 | C        | T   | exonic       | CRCT1       | synonymous SNV    | CRCT1:NM_019060:exon2:c.C120T:p.C40C                                                          | NA                                | rs2282296   | NA |
| chr1 | 1.52E+08 | 1.52E+08 | C        | T   | exonic       | CRCT1       | synonymous SNV    | CRCT1:NM_019060:exon2:c.C204T:p.R68R                                                          | NA                                | rs1053588   | NA |
| chr1 | 1.53E+08 | 1.53E+08 | A        | C   | exonic       | KPRP        | nonsynonymous SNV | KPRP:NM_001025231:exon2:c.A886C:p.T296P                                                       | NA                                | NA          | D  |
| chr1 | 1.53E+08 | 1.53E+08 | G        | T   | UTR3         | LCE1E       | NA                | NA                                                                                            | NA                                | rs114470093 | NA |
| chr1 | 1.53E+08 | 1.53E+08 | T        | C   | exonic       | IVL         | synonymous SNV    | IVL:NM_005547:exon2:c.T975C:p.H325H                                                           | NA                                | NA          | NA |
| chr1 | 1.53E+08 | 1.53E+08 | C        | T   | exonic       | SPRR2E      | nonsynonymous SNV | SPRR2E:NM_001024209:exon2:c.G161A:p.C54Y                                                      | =COSM225968;OCCURENCE=1(NS),1(lur | rs75229137  | NA |
| chr1 | 1.53E+08 | 1.53E+08 | T        | C   | exonic       | SPRR2E      | synonymous SNV    | SPRR2E:NM_001024209:exon2:c.A156G:p.Q52Q                                                      | NA                                | rs3737865   | NA |
| chr1 | 1.54E+08 | 1.54E+08 | G        | A   | UTR5         | S100A13     | NA                | NA                                                                                            | NA                                | rs3818632   | NA |
| chr1 | 1.54E+08 | 1.54E+08 | A        | G   | UTR3         | CHTOP       | NA                | NA                                                                                            | NA                                | NA          | NA |
| chr1 | 1.54E+08 | 1.54E+08 | G        | C   | exonic       | SLC27A3     | nonsynonymous SNV | SLC27A3:NM_024330:exon1:c.G329C:p.G110A                                                       | NA                                | rs34527123  | B  |
| chr1 | 1.54E+08 | 1.54E+08 | AA       | -   | UTR3         | TPM3        | NA                | NA                                                                                            | NA                                | NA          | NA |
| chr1 | 1.54E+08 | 1.54E+08 | G        | A   | UTR5         | IL6R        | NA                | NA                                                                                            | NA                                | rs4845617   | NA |
| chr1 | 1.55E+08 | 1.55E+08 | C        | T   | exonic       | ADAR        | nonsynonymous SNV | 4A:p.E982K,ADAR:NM_001193495:exon11:c.G2059A:p.E687K,ADAR:N                                   | NA                                | NA          | P  |
| chr1 | 1.55E+08 | 1.55E+08 | A        | C   | exonic       | TRIM46      | nonsynonymous SNV | 4_001256601:exon2:c.A208C:p.T70P,TRIM46:NM_025058:exon2:c.A2                                  | NA                                | NA          | P  |
| chr1 | 1.56E+08 | 1.56E+08 | G        | A   | ncRNA_exonic | MSTO2P      | NA                | NA                                                                                            | NA                                | rs66501532  | NA |
| chr1 | 1.56E+08 | 1.56E+08 | T        | -   | UTR3         | MEX3A       | NA                | NA                                                                                            | NA                                | rs201492514 | NA |
| chr1 | 1.56E+08 | 1.56E+08 | A        | -   | UTR3         | LMNA        | NA                | NA                                                                                            | NA                                | rs200317083 | NA |
| chr1 | 1.56E+08 | 1.56E+08 | GA       | -   | UTR5         | CCT3        | NA                | NA                                                                                            | NA                                | rs139949895 | NA |
| chr1 | 1.58E+08 | 1.58E+08 | T        | -   | UTR3         | CD1E        | NA                | NA                                                                                            | NA                                | NA          | NA |
| chr1 | 1.59E+08 | 1.59E+08 | A        | G   | UTR5         | IFI16       | NA                | NA                                                                                            | NA                                | rs2276404   | NA |
| chr1 | 1.59E+08 | 1.59E+08 | G        | A   | UTR3         | FCER1A      | NA                | NA                                                                                            | NA                                | rs7549785   | NA |
| chr1 | 1.6E+08  | 1.6E+08  | AC       | -   | UTR3         | KCNJ10      | NA                | NA                                                                                            | NA                                | NA          | NA |
| chr1 | 1.6E+08  | 1.6E+08  | A        | G   | exonic       | ATP1A4      | synonymous SNV    | ATP1A4:NM_144699:exon1:c.A69G:p.K23K                                                          | NA                                | rs77332724  | NA |
| chr1 | 1.6E+08  | 1.6E+08  | T        | -   | UTR3         | PEX19       | NA                | NA                                                                                            | NA                                | NA          | NA |
| chr1 | 1.61E+08 | 1.61E+08 | C        | G   | exonic       | CD48        | nonsynonymous SNV | _001256030:exon2:c.G304C:p.E102Q,CD48:NM_001778:exon2:c.G304)=COSM146667;OCCURENCE=1(stomac   | rs2295615                         | D           |    |
| chr1 | 1.61E+08 | 1.61E+08 | G        | A   | exonic       | CD48        | synonymous SNV    | 4_001256030:exon2:c.C276T:p.G92G,CD48:NM_001778:exon2:c.C276                                  | NA                                | rs1980606   | NA |
| chr1 | 1.61E+08 | 1.61E+08 | A        | C   | UTR5         | F11R        | NA                | NA                                                                                            | NA                                | NA          | NA |
| chr1 | 1.61E+08 | 1.61E+08 | -        | A   | UTR3         | USF1        | NA                | NA                                                                                            | NA                                | NA          | NA |

|      |          |          |          |          |              |                          |                   |                                                                                                 |    |             |    |
|------|----------|----------|----------|----------|--------------|--------------------------|-------------------|-------------------------------------------------------------------------------------------------|----|-------------|----|
| chr1 | 1.61E+08 | 1.61E+08 | A        | -        | UTR3         | DEDD                     | NA                | NA                                                                                              | NA | NA          | NA |
| chr1 | 1.62E+08 | 1.62E+08 | A        | G        | UTR3         | FCGR2C                   | NA                | NA                                                                                              | NA | rs144426992 | NA |
| chr1 | 1.62E+08 | 1.62E+08 | T        | C        | UTR3         | FCGR2C                   | NA                | NA                                                                                              | NA | rs199512091 | NA |
| chr1 | 1.62E+08 | 1.62E+08 | C        | G        | UTR5         | SH2D1B                   | NA                | NA                                                                                              | NA | rs66518016  | NA |
| chr1 | 1.63E+08 | 1.63E+08 | C        | T        | UTR3         | DDR2                     | NA                | NA                                                                                              | NA | rs1972086   | NA |
| chr1 | 1.63E+08 | 1.63E+08 | ACACAC   | -        | UTR3         | RGS4                     | NA                | NA                                                                                              | NA | NA          | NA |
| chr1 | 1.63E+08 | 1.63E+08 | T        | -        | UTR3         | RGS5                     | NA                | NA                                                                                              | NA | NA          | NA |
| chr1 | 1.67E+08 | 1.67E+08 | -        | A        | UTR3         | POGK                     | NA                | NA                                                                                              | NA | NA          | NA |
| chr1 | 1.68E+08 | 1.68E+08 | TAAT     | -        | UTR3         | RCS1                     | NA                | NA                                                                                              | NA | NA          | NA |
| chr1 | 1.68E+08 | 1.68E+08 | A        | G        | exonic       | ADCY10                   | synonymous SNV    | 01167749:exon16:c.T1938C;p.G646G,ADCY10:NM_018417:exon19:c.T                                    | NA | rs203795    | NA |
| chr1 | 1.68E+08 | 1.68E+08 | -        | ACACAC   | UTR3         | TIPRL                    | NA                | NA                                                                                              | NA | NA          | NA |
| chr1 | 1.7E+08  | 1.7E+08  | C        | T        | exonic       | SELP                     | synonymous SNV    | SELP:NM_003005:exon14:c.G2346A;p.T782T                                                          | NA | rs6128      | NA |
| chr1 | 1.7E+08  | 1.7E+08  | C        | T        | exonic       | KIFAP3                   | synonymous SNV    | 1204517:exon14:c.G1398A;p.G466G,KIFAP3:NM_014970:exon14:c.G1                                    | NA | rs33943686  | NA |
| chr1 | 1.7E+08  | 1.7E+08  | A        | G        | ncRNA_exonic | LOC284688                | NA                | NA                                                                                              | NA | rs3795614   | NA |
| chr1 | 1.7E+08  | 1.7E+08  | T        | C        | ncRNA_exonic | LOC284688                | NA                | NA                                                                                              | NA | rs3795615   | NA |
| chr1 | 1.71E+08 | 1.71E+08 | G        | T        | ncRNA_exonic | FMO6P                    | NA                | NA                                                                                              | NA | rs11812061  | NA |
| chr1 | 1.71E+08 | 1.71E+08 | G        | A        | ncRNA_exonic | FMO6P                    | NA                | NA                                                                                              | NA | rs7886938   | NA |
| chr1 | 1.72E+08 | 1.72E+08 | -        | TG       | UTR3         | DNM3                     | NA                | NA                                                                                              | NA | rs143989240 | NA |
| chr1 | 1.75E+08 | 1.75E+08 | T        | G        | exonic       | TNN                      | nonsynonymous SNV | TNN:NM_022093:exon19:c.T3764G;p.V1255G                                                          | NA | NA          | D  |
| chr1 | 1.77E+08 | 1.77E+08 | C        | T        | exonic       | PAPPA2                   | synonymous SNV    | PAPPA2:NM_020318:exon22:c.C5262T;p.D1754D                                                       | NA | rs12118034  | NA |
| chr1 | 1.78E+08 | 1.78E+08 | G        | A        | exonic       | SEC16B                   | synonymous SNV    | SEC16B:NM_033127:exon8:c.C954T;p.S318S                                                          | NA | rs35891059  | NA |
| chr1 | 1.79E+08 | 1.79E+08 | C        | T        | UTR3         | ABL2                     | NA                | NA                                                                                              | NA | NA          | NA |
| chr1 | 1.8E+08  | 1.8E+08  | A        | G        | exonic       | TDRD5                    | nonsynonymous SNV | 001199089:exon7:c.A1072G;p.K358E,TDRD5:NM_001199091:exon7:c.                                    | NA | rs6704505   | B  |
| chr1 | 1.8E+08  | 1.8E+08  | CGCGCG   | -        | UTR3         | FAM163A                  | NA                | NA                                                                                              | NA | rs71744420  | NA |
| chr1 | 1.81E+08 | 1.81E+08 | C        | T        | exonic       | KIAA1614                 | synonymous SNV    | KIAA1614:NM_020950:exon4:c.C1065T;p.T355T                                                       | NA | rs3747958   | NA |
| chr1 | 1.82E+08 | 1.82E+08 | G        | A        | exonic       | CACNA1E                  | nonsynonymous SNV | 0.A1936T,CACNA1E:NM_000721:exon44:c.G5863A;p.A1955T,CACNA1E                                     | NA | rs704326    | NA |
| chr1 | 1.83E+08 | 1.83E+08 | C        | T        | exonic       | LAMC1                    | synonymous SNV    | LAMC1:NM_002293:exon2:c.C657T;p.N219N                                                           | NA | rs2296289   | NA |
| chr1 | 1.83E+08 | 1.83E+08 | A        | G        | UTR5         | LAMC2                    | NA                | NA                                                                                              | NA | rs2276542   | NA |
| chr1 | 1.83E+08 | 1.83E+08 | A        | C        | UTR5         | LAMC2                    | NA                | NA                                                                                              | NA | NA          | NA |
| chr1 | 1.83E+08 | 1.83E+08 | -        | GT       | UTR3         | NMNAT2                   | NA                | NA                                                                                              | NA | NA          | NA |
| chr1 | 1.85E+08 | 1.85E+08 | T        | A        | UTR3         | FAM129A                  | NA                | NA                                                                                              | NA | rs526024    | NA |
| chr1 | 1.85E+08 | 1.85E+08 | T        | G        | UTR5         | TRMT1L                   | NA                | NA                                                                                              | NA | NA          | NA |
| chr1 | 1.86E+08 | 1.86E+08 | T        | C        | exonic       | PRG4                     | synonymous SNV    | 001127709:exon5:c.T945C;p.T315T,PRG4:NM_001127708:exon6:c.T1D=COSM463577;OCCURENCE=1(kidney     | NA | NA          | NA |
| chr1 | 1.86E+08 | 1.86E+08 | T        | C        | exonic       | PRG4                     | nonsynonymous SNV | 001127709:exon5:c.T1000C;p.S334P,PRG4:NM_001127708:exon6:c.T1V228824;OCCURENCE=1(skin),2(endorr | NA | NA          | NA |
| chr1 | 1.86E+08 | 1.86E+08 | T        | C        | exonic       | PRG4                     | nonsynonymous SNV | 001127709:exon5:c.T1351C;p.S451P,PRG4:NM_001127708:exon6:c.T                                    | NA | NA          | NA |
| chr1 | 1.92E+08 | 1.92E+08 | -        | AAATTTTG | UTR3         | RGS21                    | NA                | NA                                                                                              | NA | rs140108972 | NA |
| chr1 | 1.93E+08 | 1.93E+08 | -        | G        | UTR5         | CDC73                    | NA                | NA                                                                                              | NA | NA          | NA |
| chr1 | 1.97E+08 | 1.97E+08 | T        | G        | UTR3         | CFHR5                    | NA                | NA                                                                                              | NA | rs10922153  | NA |
| chr1 | 2.01E+08 | 2.01E+08 | T        | G        | UTR3         | KIF21B                   | NA                | NA                                                                                              | NA | NA          | NA |
| chr1 | 2.01E+08 | 2.01E+08 | -        | A        | UTR3         | TMEM9                    | NA                | NA                                                                                              | NA | NA          | NA |
| chr1 | 2.01E+08 | 2.01E+08 | A        | G        | exonic       | IGFN1                    | nonsynonymous SNV | IGFN1:NM_001164586:exon12:c.A5416G;p.S1806G                                                     | NA | NA          | NA |
| chr1 | 2.01E+08 | 2.01E+08 | T        | A        | exonic       | IGFN1                    | nonsynonymous SNV | IGFN1:NM_001164586:exon12:c.T5423A;p.V1808E                                                     | NA | NA          | NA |
| chr1 | 2.01E+08 | 2.01E+08 | G        | C        | exonic       | IGFN1                    | nonsynonymous SNV | IGFN1:NM_001164586:exon12:c.G5431C;p.G1811R                                                     | NA | NA          | NA |
| chr1 | 2.01E+08 | 2.01E+08 | A        | G        | exonic       | IGFN1                    | nonsynonymous SNV | IGFN1:NM_001164586:exon12:c.A5963G;p.E1988G                                                     | NA | NA          | NA |
| chr1 | 2.02E+08 | 2.02E+08 | A        | G        | UTR3         | IPO9                     | NA                | NA                                                                                              | NA | rs2644134   | NA |
| chr1 | 2.02E+08 | 2.02E+08 | AAAC     | -        | UTR3         | IPO9                     | NA                | NA                                                                                              | NA | NA          | NA |
| chr1 | 2.02E+08 | 2.02E+08 | A        | G        | UTR3         | LMOD1                    | NA                | NA                                                                                              | NA | rs8028      | NA |
| chr1 | 2.02E+08 | 2.02E+08 | AA       | -        | UTR3         | ELF3                     | NA                | NA                                                                                              | NA | rs77731786  | NA |
| chr1 | 2.02E+08 | 2.02E+08 | A        | C        | ncRNA_exonic | PTPRVP                   | NA                | NA                                                                                              | NA | rs7550457   | NA |
| chr1 | 2.02E+08 | 2.02E+08 | A        | G        | ncRNA_exonic | PTPRVP                   | NA                | NA                                                                                              | NA | rs7550551   | NA |
| chr1 | 2.02E+08 | 2.02E+08 | TGCCACCT | -        | ncRNA_exonic | PTPRVP                   | NA                | NA                                                                                              | NA | rs72139344  | NA |
| chr1 | 2.03E+08 | 2.03E+08 | -        | AC       | UTR3         | SYT2                     | NA                | NA                                                                                              | NA | NA          | NA |
| chr1 | 2.03E+08 | 2.03E+08 | AAA      | -        | UTR3         | MYOG                     | NA                | NA                                                                                              | NA | rs141029773 | NA |
| chr1 | 2.04E+08 | 2.04E+08 | T        | C        | exonic       | ATP2B4                   | synonymous SNV    | 1_001001396:exon3:c.T318C;p.L106L,ATP2B4:NM_001684:exon3:c.T3                                   | NA | rs2228445   | NA |
| chr1 | 2.04E+08 | 2.04E+08 | A        | G        | UTR3         | PLEKHA6                  | NA                | NA                                                                                              | NA | rs74141005  | NA |
| chr1 | 2.05E+08 | 2.05E+08 | T        | -        | UTR3         | MDM4                     | NA                | NA                                                                                              | NA | NA          | NA |
| chr1 | 2.05E+08 | 2.05E+08 | -        | T        | UTR3         | RBBP5                    | NA                | NA                                                                                              | NA | NA          | NA |
| chr1 | 2.05E+08 | 2.05E+08 | G        | A        | UTR5         | NUAK2                    | NA                | NA                                                                                              | NA | rs3738746   | NA |
| chr1 | 2.07E+08 | 2.07E+08 | T        | C        | exonic       | AP2,SRGAP2B,SRGAP2C,SRGA | synonymous SNV    | SRGAP2D:NM_001271887:exon6:c.T759C;p.F253F                                                      | NA | rs200703951 | NA |
| chr1 | 2.07E+08 | 2.07E+08 | C        | T        | UTR3         | C1orf116                 | NA                | NA                                                                                              | NA | rs10877     | NA |
| chr1 | 2.07E+08 | 2.07E+08 | C        | T        | UTR3         | PFKFB2                   | NA                | NA                                                                                              | NA | NA          | NA |
| chr1 | 2.07E+08 | 2.07E+08 | -        | T        | UTR3         | PFKFB2                   | NA                | NA                                                                                              | NA | NA          | NA |
| chr1 | 2.07E+08 | 2.07E+08 | -        | CAGACTTT | UTR3         | PFKFB2                   | NA                | NA                                                                                              | NA | NA          | NA |
| chr1 | 2.08E+08 | 2.08E+08 | -        | T        | UTR3         | PLXNA2                   | NA                | NA                                                                                              | NA | NA          | NA |
| chr1 | 2.1E+08  | 2.1E+08  | T        | -        | UTR3         | DIEXF                    | NA                | NA                                                                                              | NA | NA          | NA |
| chr1 | 2.1E+08  | 2.1E+08  | C        | A        | UTR3         | SERTAD4                  | NA                | NA                                                                                              | NA | NA          | NA |

|      |          |          |      |      |              |               |                   |                                                                                                                   |    |             |    |
|------|----------|----------|------|------|--------------|---------------|-------------------|-------------------------------------------------------------------------------------------------------------------|----|-------------|----|
| chr1 | 2.11E+08 | 2.11E+08 | A    | -    | UTR3         | KCNH1         | NA                | NA                                                                                                                | NA | rs56001969  | NA |
| chr1 | 2.12E+08 | 2.12E+08 | GT   | -    | UTR5         | RD3           | NA                | NA                                                                                                                | NA | rs34485370  | NA |
| chr1 | 2.12E+08 | 2.12E+08 | T    | G    | UTR3         | DTL           | NA                | NA                                                                                                                | NA | rs1387815   | NA |
| chr1 | 2.13E+08 | 2.13E+08 | -    | A    | UTR3         | NSL1          | NA                | NA                                                                                                                | NA | NA          | NA |
| chr1 | 2.13E+08 | 2.13E+08 | T    | G    | UTR3         | NSL1          | NA                | NA                                                                                                                | NA | NA          | NA |
| chr1 | 2.13E+08 | 2.13E+08 | A    | G    | UTR3         | NSL1          | NA                | NA                                                                                                                | NA | rs11800642  | NA |
| chr1 | 2.13E+08 | 2.13E+08 | T    | -    | UTR3         | FLVCR1        | NA                | NA                                                                                                                | NA | NA          | NA |
| chr1 | 2.15E+08 | 2.15E+08 | G    | A    | exonic       | CENPF         | nonsynonymous SNV | CENPF:NM_016343:exon16:c.G8186A:p.R2729Q                                                                          | NA | rs335524    | NA |
| chr1 | 2.19E+08 | 2.19E+08 | CA   | -    | UTR5         | TGFB2         | NA                | NA                                                                                                                | NA | rs151329324 | NA |
| chr1 | 2.2E+08  | 2.2E+08  | T    | -    | UTR3         | RAB3GAP2      | NA                | NA                                                                                                                | NA | rs35147354  | NA |
| chr1 | 2.21E+08 | 2.21E+08 | T    | C    | UTR5         | 2-Mar         | NA                | NA                                                                                                                | NA | NA          | NA |
| chr1 | 2.21E+08 | 2.21E+08 | C    | T    | UTR5         | 2-Mar         | NA                | NA                                                                                                                | NA | NA          | NA |
| chr1 | 2.21E+08 | 2.21E+08 | A    | T    | UTR5         | 2-Mar         | NA                | NA                                                                                                                | NA | NA          | NA |
| chr1 | 2.21E+08 | 2.21E+08 | A    | T    | UTR5         | 2-Mar         | NA                | NA                                                                                                                | NA | NA          | NA |
| chr1 | 2.21E+08 | 2.21E+08 | A    | T    | UTR5         | 2-Mar         | NA                | NA                                                                                                                | NA | NA          | NA |
| chr1 | 2.21E+08 | 2.21E+08 | A    | G    | UTR5         | HLX           | NA                | NA                                                                                                                | NA | rs2738752   | NA |
| chr1 | 2.22E+08 | 2.22E+08 | T    | C    | ncRNA_exonic | C1orf140      | NA                | NA                                                                                                                | NA | rs4347216   | NA |
| chr1 | 2.23E+08 | 2.23E+08 | G    | A    | exonic       | HHIPL2        | synonymous SNV    | HHIPL2:NM_024746:exon8:c.C1845T:p.P615P                                                                           | NA | rs199572964 | NA |
| chr1 | 2.23E+08 | 2.23E+08 | G    | C    | exonic       | TAF1A         | synonymous SNV    | rs1134898                                                                                                         | NA | rs1134898   | NA |
| chr1 | 2.24E+08 | 2.24E+08 | C    | T    | UTR3         | DEGS1         | NA                | NA                                                                                                                | NA | rs908803    | NA |
| chr1 | 2.25E+08 | 2.25E+08 | A    | G    | exonic       | DNAH14        | nonsynonymous SNV | DNAH14:NM_001373:exon37:c.A5771G:p.K1924R                                                                         | NA | rs191528375 | NA |
| chr1 | 2.26E+08 | 2.26E+08 | A    | G    | exonic       | EPHX1         | nonsynonymous SNV | EPHX1:NM_001120:exon4:c.A416G;p.H139R,EPHX1:NM_001136018:exon4:c.A416G;p.H139R                                    | NA | rs2234922   | B  |
| chr1 | 2.26E+08 | 2.26E+08 | C    | A    | exonic       | LEFTY2        | nonsynonymous SNV | LEFTY2:NM_001172425:exon3:c.G33240:exon2:c.G439T;p.V147F,LEFTY2:NM_001172425:exon3:c.G33240:exon2:c.G439T;p.V147F | NA | NA          | P  |
| chr1 | 2.26E+08 | 2.26E+08 | G    | A    | UTR5         | LIN9          | NA                | NA                                                                                                                | NA | NA          | NA |
| chr1 | 2.26E+08 | 2.26E+08 | G    | T    | UTR5         | LIN9          | NA                | NA                                                                                                                | NA | NA          | NA |
| chr1 | 2.26E+08 | 2.26E+08 | G    | T    | UTR5         | LIN9          | NA                | NA                                                                                                                | NA | NA          | NA |
| chr1 | 2.26E+08 | 2.26E+08 | G    | A    | UTR5         | LIN9          | NA                | NA                                                                                                                | NA | NA          | NA |
| chr1 | 2.26E+08 | 2.26E+08 | G    | A    | UTR5         | LIN9          | NA                | NA                                                                                                                | NA | NA          | NA |
| chr1 | 2.26E+08 | 2.26E+08 | G    | A    | UTR5         | LIN9          | NA                | NA                                                                                                                | NA | NA          | NA |
| chr1 | 2.26E+08 | 2.26E+08 | G    | A    | UTR5         | LIN9          | NA                | NA                                                                                                                | NA | NA          | NA |
| chr1 | 2.27E+08 | 2.27E+08 | A    | G    | UTR3         | C1orf95       | NA                | NA                                                                                                                | NA | rs114523191 | NA |
| chr1 | 2.28E+08 | 2.28E+08 | AAAA | -    | UTR5         | CDC42BPA      | NA                | NA                                                                                                                | NA | rs199516755 | NA |
| chr1 | 2.28E+08 | 2.28E+08 | G    | A    | exonic       | OBSCN         | nonsynonymous SNV | OBSCN:NM_02720M,OBSCN:NM_052843:exon30:c.G8158A:p.V2720M,OBSCN:NM_052843:exon30:c.G8158A;p.V2720M                 | NA | rs1188697   | NA |
| chr1 | 2.29E+08 | 2.29E+08 | C    | T    | exonic       | OBSCN         | nonsynonymous SNV | OBSCN:NM_052843:exon51:c.C13546T;p.R4516W,OBSCN:NM_052843:exon51:c.C13546T;p.R4516W                               | NA | rs11810627  | NA |
| chr1 | 2.3E+08  | 2.3E+08  | G    | A    | UTR3         | TAF5L         | NA                | NA                                                                                                                | NA | rs3820359   | NA |
| chr1 | 2.3E+08  | 2.3E+08  | C    | T    | intronic     | PGBD5         | NA                | NA                                                                                                                | NA | rs2009265   | NA |
| chr1 | 2.3E+08  | 2.3E+08  | A    | C    | intronic     | PGBD5         | NA                | NA                                                                                                                | NA | rs74143198  | NA |
| chr1 | 2.31E+08 | 2.31E+08 | T    | G    | UTR3         | C1orf198      | NA                | NA                                                                                                                | NA | NA          | NA |
| chr1 | 2.31E+08 | 2.31E+08 | A    | G    | exonic       | ARV1          | nonsynonymous SNV | ARV1:NM_022786:exon1:c.A37G:p.K13E                                                                                | NA | NA          | P  |
| chr1 | 2.31E+08 | 2.31E+08 | C    | T    | UTR3         | FAM89A        | NA                | NA                                                                                                                | NA | NA          | NA |
| chr1 | 2.31E+08 | 2.31E+08 | A    | T    | UTR3         | FAM89A        | NA                | NA                                                                                                                | NA | NA          | NA |
| chr1 | 2.31E+08 | 2.31E+08 | C    | A    | UTR3         | FAM89A        | NA                | NA                                                                                                                | NA | NA          | NA |
| chr1 | 2.31E+08 | 2.31E+08 | C    | A    | UTR3         | FAM89A        | NA                | NA                                                                                                                | NA | NA          | NA |
| chr1 | 2.32E+08 | 2.32E+08 | -    | TTAC | ncRNA_UTR3   | DISC1         | NA                | NA                                                                                                                | NA | NA          | NA |
| chr1 | 2.33E+08 | 2.33E+08 | G    | A    | exonic       | SIPA1L2       | nonsynonymous SNV | SIPA1L2:NM_020808:exon14:c.C4208T:p.S1403L                                                                        | NA | rs1547742   | P  |
| chr1 | 2.33E+08 | 2.33E+08 | C    | T    | exonic       | SIPA1L2       | synonymous SNV    | SIPA1L2:NM_020808:exon1:c.G219A:p.K73K                                                                            | NA | rs4649383   | NA |
| chr1 | 2.34E+08 | 2.34E+08 | A    | C    | UTR5         | SLC35F3       | NA                | NA                                                                                                                | NA | rs12136133  | NA |
| chr1 | 2.34E+08 | 2.34E+08 | G    | C    | exonic       | SLC35F3       | synonymous SNV    | SLC35F3:NM_173508:exon2:c.G201C:p.P67P                                                                            | NA | rs57010808  | NA |
| chr1 | 2.35E+08 | 2.35E+08 | T    | C    | exonic       | TARBP1        | nonsynonymous SNV | TARBP1:NM_005646:exon12:c.A2032G;p.S678G                                                                          | NA | rs4920246   | B  |
| chr1 | 2.35E+08 | 2.35E+08 | T    | C    | exonic       | ARID4B        | synonymous SNV    | ARID4B:NM_016374:exon11:c.A897G;p.E299E,ARID4B:NM_016374:exon11:c.A897G;p.E299E                                   | NA | rs12731746  | NA |
| chr1 | 2.36E+08 | 2.36E+08 | G    | C    | UTR3         | B3GALNT2      | NA                | NA                                                                                                                | NA | rs6429095   | NA |
| chr1 | 2.36E+08 | 2.36E+08 | G    | A    | UTR3         | B3GALNT2      | NA                | NA                                                                                                                | NA | rs6429096   | NA |
| chr1 | 2.36E+08 | 2.36E+08 | A    | -    | UTR3         | B3GALNT2      | NA                | NA                                                                                                                | NA | NA          | NA |
| chr1 | 2.36E+08 | 2.36E+08 | G    | C    | UTR3         | GNG4          | NA                | NA                                                                                                                | NA | rs12022945  | NA |
| chr1 | 2.37E+08 | 2.37E+08 | A    | -    | downstream   | EDARADD       | NA                | NA                                                                                                                | NA | rs11358746  | NA |
| chr1 | 2.37E+08 | 2.37E+08 | T    | A    | exonic       | LGALS8        | nonsynonymous SNV | LGALS8:NM_006499:exon4:c.T56A:p.F19Y,LGALS8:NM_201543:exon4:c.T56A)=COSM146350;OCCURENCE=1(stomac                 | NA | rs1126407   | B  |
| chr1 | 2.37E+08 | 2.37E+08 | T    | C    | exonic       | LGALS8        | synonymous SNV    | LGALS8:NM_006499:exon4:c.T72C:p.P24P,LGALS8:NM_201543:exon4:c.T72C)=COSM146830;OCCURENCE=1(stomac                 | NA | rs1041934   | NA |
| chr1 | 2.37E+08 | 2.37E+08 | C    | T    | exonic       | LGALS8        | nonsynonymous SNV | LGALS8:NM_006499:exon4:c.C106T;p.R36C,LGALS8:NM_201543:exon4:c.C106)=COSM146351;OCCURENCE=1(stomac                | NA | rs1041935   | B  |
| chr1 | 2.37E+08 | 2.37E+08 | G    | A    | exonic       | LGALS8        | synonymous SNV    | LGALS8:NM_006499:exon5:c.G330A:p.L110L,LGALS8:NM_201543:exon5:c.G330                                              | NA | rs2472126   | NA |
| chr1 | 2.37E+08 | 2.37E+08 | A    | C    | UTR3         | HEATR1,LGALS8 | NA                | NA                                                                                                                | NA | rs6989      | NA |
| chr1 | 2.37E+08 | 2.37E+08 | C    | T    | exonic       | HEATR1        | synonymous SNV    | HEATR1:NM_018072:exon43:c.G6159A:p.S2053S                                                                         | NA | rs2275685   | NA |
| chr1 | 2.37E+08 | 2.37E+08 | C    | A    | exonic       | HEATR1        | synonymous SNV    | HEATR1:NM_018072:exon20:c.G2565T;p.V855V                                                                          | NA | rs4518892   | NA |
| chr1 | 2.37E+08 | 2.37E+08 | T    | -    | UTR3         | MTR           | NA                | NA                                                                                                                | NA | rs67705775  | NA |
| chr1 | 2.37E+08 | 2.37E+08 | A    | G    | UTR3         | MTR           | NA                | NA                                                                                                                | NA | rs1050993   | NA |
| chr1 | 2.37E+08 | 2.37E+08 | G    | T    | UTR3         | MTR           | NA                | NA                                                                                                                | NA | rs10925264  | NA |
| chr1 | 2.38E+08 | 2.38E+08 | C    | G    | UTR3         | RYR2          | NA                | NA                                                                                                                | NA | rs12406863  | NA |
| chr1 | 2.4E+08  | 2.4E+08  | C    | T    | exonic       | FMN2          | nonsynonymous SNV | FMN2:NM_020066:exon5:c.C2834T:p.P945L                                                                             | NA | rs193049501 | NA |
| chr1 | 2.4E+08  | 2.4E+08  | G    | T    | exonic       | FMN2          | synonymous SNV    | FMN2:NM_020066:exon5:c.G2868T;p.P956P                                                                             | NA | NA          | NA |
| chr1 | 2.4E+08  | 2.4E+08  | C    | A    | exonic       | FMN2          | synonymous SNV    | FMN2:NM_020066:exon5:c.C2988A:p.G996G                                                                             | NA | rs71646887  | NA |
| chr1 | 2.4E+08  | 2.4E+08  | C    | T    | exonic       | FMN2          | synonymous SNV    | FMN2:NM_020066:exon5:c.C2994T;p.P998P                                                                             | NA | rs11586155  | NA |
| chr1 | 2.4E+08  | 2.4E+08  | G    | A    | exonic       | FMN2          | synonymous SNV    | FMN2:NM_020066:exon5:c.G3000A:p.P1000P                                                                            | NA | rs71646889  | NA |
| chr1 | 2.45E+08 | 2.45E+08 | G    | C    | exonic       | HNRNPU        | synonymous SNV    | HNRNPU:NM_004501:exon1:c.C519G;p.P173P,HNRNPU:NM_031844:exon1:c.C51                                               | NA | NA          | NA |

|      |          |          |          |          |              |                             |                   |                                                                                                                                                                                                                                                                                    |                                  |             |    |
|------|----------|----------|----------|----------|--------------|-----------------------------|-------------------|------------------------------------------------------------------------------------------------------------------------------------------------------------------------------------------------------------------------------------------------------------------------------------|----------------------------------|-------------|----|
| chr1 | 2.45E+08 | 2.45E+08 | C        | T        | exonic       | HNRNPU                      | synonymous SNV    | NM_004501:exon1:c.G261A:p.E87E,HNRNPU:NM_031844:exon1:c.G261A                                                                                                                                                                                                                      | NA                               | rs6675421   | NA |
| chr1 | 2.45E+08 | 2.45E+08 | A        | G        | intronic     | EFCAB2                      | NA                | NA                                                                                                                                                                                                                                                                                 | NA                               | rs7542813   | NA |
| chr1 | 2.47E+08 | 2.47E+08 | -        | CACACACA | ncRNA_UTR3   | ZNF670                      | NA                | NA                                                                                                                                                                                                                                                                                 | NA                               | NA          | NA |
| chr1 | 2.47E+08 | 2.47E+08 | G        | A        | UTR3         | ZNF669                      | NA                | NA                                                                                                                                                                                                                                                                                 | NA                               | rs140375048 | NA |
| chr1 | 2.47E+08 | 2.47E+08 | G        | A        | UTR3         | ZNF124                      | NA                | NA                                                                                                                                                                                                                                                                                 | NA                               | NA          | NA |
| chr1 | 2.48E+08 | 2.48E+08 | G        | C        | UTR3         | OR2C3                       | NA                | NA                                                                                                                                                                                                                                                                                 | NA                               | rs4925558   | NA |
| chr1 | 2.48E+08 | 2.48E+08 | T        | G        | exonic       | OR11L1                      | nonsynonymous SNV | OR11L1:NM_001001959:exon1:c.A539C:p.D180A                                                                                                                                                                                                                                          | NA                               | NA          | P  |
| chr1 | 2.49E+08 | 2.49E+08 | C        | G        | exonic       | OR2T2                       | synonymous SNV    | OR2T2:NM_001004136:exon1:c.C651G:p.V217V                                                                                                                                                                                                                                           | NA                               | rs151176830 | NA |
| chr1 | 2.49E+08 | 2.49E+08 | G        | A        | exonic       | OR2T34                      | nonsynonymous SNV | OR2T34:NM_001001821:exon1:c.C892T:p.R298C                                                                                                                                                                                                                                          | NA                               | rs148590921 | D  |
| chr1 | 2.49E+08 | 2.49E+08 | G        | A        | exonic       | OR2T34                      | nonsynonymous SNV | OR2T34:NM_001001821:exon1:c.C766T:p.L256F                                                                                                                                                                                                                                          | NA                               | rs200427293 | B  |
| chr1 | 2.49E+08 | 2.49E+08 | C        | G        | exonic       | OR2T34                      | synonymous SNV    | OR2T34:NM_001001821:exon1:c.G765C:p.L255L                                                                                                                                                                                                                                          | NA                               | rs201475070 | NA |
| chr1 | 2.49E+08 | 2.49E+08 | A        | G        | exonic       | OR2T34                      | nonsynonymous SNV | OR2T34:NM_001001821:exon1:c.T464C:p.V155A                                                                                                                                                                                                                                          | ID=COSM120080;OCCURENCE=1(ovary) | rs150601708 | B  |
| chr1 | 2.49E+08 | 2.49E+08 | T        | C        | exonic       | OR2T35                      | synonymous SNV    | OR2T35:NM_001001827:exon1:c.A303G:p.Q101Q                                                                                                                                                                                                                                          | NA                               | rs145908089 | NA |
| chr1 | 2.49E+08 | 2.49E+08 | C        | -        | UTR5         | SH3BP5L                     | NA                | NA                                                                                                                                                                                                                                                                                 | NA                               | rs28362662  | NA |
| chr2 | 224919   | 224919   | A        | G        | exonic       | SH3YL1                      | synonymous SNV    | SH3YL1:NM_015677:exon9:c.T783C:p.S261S                                                                                                                                                                                                                                             | NA                               | rs2290911   | NA |
| chr2 | 905494   | 905494   | C        | G        | intergenic   | 822(dist=41382),SNTG2(dist= | NA                | NA                                                                                                                                                                                                                                                                                 | NA                               | NA          | NA |
| chr2 | 905805   | 905805   | G        | C        | intergenic   | 822(dist=41693),SNTG2(dist= | NA                | NA                                                                                                                                                                                                                                                                                 | NA                               | rs111612803 | NA |
| chr2 | 3718692  | 3718692  | C        | T        | UTR5         | ALLC                        | NA                | NA                                                                                                                                                                                                                                                                                 | NA                               | rs13409104  | NA |
| chr2 | 5838684  | 5838686  | AAA      | -        | UTR3         | SOX11                       | NA                | NA                                                                                                                                                                                                                                                                                 | NA                               | rs201898989 | NA |
| chr2 | 9544866  | 9544866  | -        | T        | UTR3         | ASAP2                       | NA                | NA                                                                                                                                                                                                                                                                                 | NA                               | NA          | NA |
| chr2 | 9546272  | 9546272  | T        | G        | UTR3         | ITGB1BP1                    | NA                | NA                                                                                                                                                                                                                                                                                 | NA                               | rs10173551  | NA |
| chr2 | 9546549  | 9546552  | TGTT     | -        | UTR3         | ITGB1BP1                    | NA                | NA                                                                                                                                                                                                                                                                                 | NA                               | NA          | NA |
| chr2 | 9629855  | 9629857  | AAA      | -        | UTR3         | ADAM17                      | NA                | NA                                                                                                                                                                                                                                                                                 | NA                               | NA          | NA |
| chr2 | 10281514 | 10281514 | C        | T        | upstream     | C2orf48                     | NA                | NA                                                                                                                                                                                                                                                                                 | NA                               | rs17313542  | NA |
| chr2 | 11966640 | 11966641 | AA       | -        | UTR3         | LPIN1                       | NA                | NA                                                                                                                                                                                                                                                                                 | NA                               | NA          | NA |
| chr2 | 18768850 | 18768850 | A        | G        | exonic       | NT5C1B,NT5C1B-RDH14         | synonymous SNV    | .P13P,NT5C1B:NM_001199088:exon2:c.T39C:p.P13P,NT5C1B-RDH14:NT5C1B:NM_001199088:exon2:c.T39C:p.P13P                                                                                                                                                                                 | NA                               | rs16985306  | NA |
| chr2 | 20131079 | 20131079 | T        | C        | exonic       | WDR35                       | nonsynonymous SNV | WDR35:NM_001006657:exon25:c.A20779:exon24:c.A2915G:p.E972G,WDR35:NM_001006657:exon25:c.A20779                                                                                                                                                                                      | NA                               | rs1191778   | B  |
| chr2 | 20648145 | 20648145 | A        | C        | UTR3         | RHOB                        | NA                | NA                                                                                                                                                                                                                                                                                 | NA                               | NA          | NA |
| chr2 | 24307470 | 24307470 | G        | T        | UTR5         | TP53I3                      | NA                | NA                                                                                                                                                                                                                                                                                 | NA                               | rs33958836  | NA |
| chr2 | 25050977 | 25050977 | T        | C        | exonic       | ADCY3                       | synonymous SNV    | ADCY3:NM_004036:exon13:c.A2226G:p.E742E                                                                                                                                                                                                                                            | NA                               | rs7566416   | NA |
| chr2 | 27002706 | 27002706 | C        | T        | UTR3         | SLC35F6                     | NA                | NA                                                                                                                                                                                                                                                                                 | NA                               | NA          | NA |
| chr2 | 27477981 | 27477981 | A        | C        | UTR3         | SLC30A3                     | NA                | NA                                                                                                                                                                                                                                                                                 | NA                               | NA          | NA |
| chr2 | 27804534 | 27804534 | C        | G        | exonic       | C2orf16                     | nonsynonymous SNV | C2orf16:NM_032266:exon1:c.C5095G:p.Q1699E                                                                                                                                                                                                                                          | NA                               | NA          | NA |
| chr2 | 27804548 | 27804548 | T        | C        | exonic       | C2orf16                     | synonymous SNV    | C2orf16:NM_032266:exon1:c.T5109C:p.R1703R                                                                                                                                                                                                                                          | NA                               | NA          | NA |
| chr2 | 27804607 | 27804607 | G        | A        | exonic       | C2orf16                     | nonsynonymous SNV | C2orf16:NM_032266:exon1:c.G5168A:p.R1723Q                                                                                                                                                                                                                                          | NA                               | rs202029351 | NA |
| chr2 | 27838058 | 27838058 | C        | A        | exonic       | ZNF512                      | synonymous SNV    | .001271288:exon10:c.C924A:p.L308L,ZNF512:NM_001271289:exon10:c.C924A:p.L308L                                                                                                                                                                                                       | NA                               | rs1127071   | NA |
| chr2 | 29023100 | 29023100 | T        | C        | UTR3         | PPP1CB                      | NA                | NA                                                                                                                                                                                                                                                                                 | NA                               | NA          | NA |
| chr2 | 29226512 | 29226512 | A        | G        | exonic       | FAM179A                     | nonsynonymous SNV | FAM179A:NM_199280:exon6:c.A794G:p.Q265R                                                                                                                                                                                                                                            | NA                               | rs12623297  | NA |
| chr2 | 30480656 | 30480656 | -        | TTTTTT   | UTR3         | LBH                         | NA                | NA                                                                                                                                                                                                                                                                                 | NA                               | rs113721073 | NA |
| chr2 | 30864774 | 30864774 | -        | T        | UTR3         | LCLAT1                      | NA                | NA                                                                                                                                                                                                                                                                                 | NA                               | NA          | NA |
| chr2 | 30865267 | 30865267 | T        | -        | UTR3         | LCLAT1                      | NA                | NA                                                                                                                                                                                                                                                                                 | NA                               | NA          | NA |
| chr2 | 30865753 | 30865753 | -        | TT       | UTR3         | LCLAT1                      | NA                | NA                                                                                                                                                                                                                                                                                 | NA                               | NA          | NA |
| chr2 | 30865757 | 30865757 | C        | T        | UTR3         | LCLAT1                      | NA                | NA                                                                                                                                                                                                                                                                                 | NA                               | rs201834336 | NA |
| chr2 | 31396115 | 31396115 | G        | A        | UTR3         | CAPN14                      | NA                | NA                                                                                                                                                                                                                                                                                 | NA                               | rs2044244   | NA |
| chr2 | 31457155 | 31457167 | GACCCCGG | -        | UTR5         | EHD3                        | NA                | NA                                                                                                                                                                                                                                                                                 | NA                               | rs144609065 | NA |
| chr2 | 31489628 | 31489629 | AC       | -        | UTR3         | EHD3                        | NA                | NA                                                                                                                                                                                                                                                                                 | NA                               | rs67643147  | NA |
| chr2 | 31610701 | 31610701 | C        | T        | exonic       | XDH                         | synonymous SNV    | XDH:NM_000379:exon8:c.G627A:p.E209E                                                                                                                                                                                                                                                | NA                               | rs45575032  | NA |
| chr2 | 32843295 | 32843295 | A        | -        | UTR3         | BIRC6                       | NA                | NA                                                                                                                                                                                                                                                                                 | NA                               | rs140477433 | NA |
| chr2 | 32983526 | 32983526 | C        | T        | exonic       | TTC27                       | synonymous SNV    | .01193509:exon13:c.C1470T:p.N490N,TTC27:NM_017735:exon13:c.C10=COSM148836;OCCURENCE=1(stomach)                                                                                                                                                                                     | NA                               | rs2273665   | NA |
| chr2 | 33412077 | 33412077 | G        | A        | exonic       | LTBP1                       | synonymous SNV    | .01193509:exon13:c.C1470T:p.N490N,TTC27:NM_017735:exon13:c.C10=COSM148836;OCCURENCE=1(stomach);p.A126A,LTBP1:NM_001166265:exon2:c.G378A:p.A126A,LTBP1:NM_001166265:exon2:c.G378A:p.A126A                                                                                           | NA                               | rs1065324   | NA |
| chr2 | 33447202 | 33447202 | C        | T        | exonic       | LTBP1                       | synonymous SNV    | .01193509:exon13:c.C1470T:p.N490N,TTC27:NM_017735:exon13:c.C10=COSM148836;OCCURENCE=1(stomach);p.A126A,LTBP1:NM_001166265:exon2:c.G378A:p.A126A,LTBP1:NM_001166265:exon2:c.G378A:p.A126A;p.N294N,LTBP1:NM_001166265:exon5:c.C882T:p.N294N,LTBP1:NM_001166265:exon5:c.C882T:p.N294N | NA                               | rs2290448   | NA |
| chr2 | 33951299 | 33951299 | -        | TT       | ncRNA_exonic | MYADML                      | NA                | NA                                                                                                                                                                                                                                                                                 | NA                               | rs71409649  | NA |
| chr2 | 36777378 | 36777378 | T        | -        | UTR3         | CRIM1                       | NA                | NA                                                                                                                                                                                                                                                                                 | NA                               | rs10707574  | NA |
| chr2 | 37230734 | 37230734 | C        | T        | exonic       | HEATR5B                     | synonymous SNV    | HEATR5B:NM_019024:exon31:c.G5001A:p.Q1667Q                                                                                                                                                                                                                                         | NA                               | rs17497654  | NA |
| chr2 | 37310452 | 37310452 | C        | A        | exonic       | HEATR5B                     | nonsynonymous SNV | HEATR5B:NM_019024:exon2:c.G106T:p.V36F                                                                                                                                                                                                                                             | NA                               | NA          | D  |
| chr2 | 37323460 | 37323460 | G        | C        | UTR3         | GPATCH11                    | NA                | NA                                                                                                                                                                                                                                                                                 | NA                               | rs12474977  | NA |
| chr2 | 38522140 | 38522140 | T        | G        | UTR3         | ATL2                        | NA                | NA                                                                                                                                                                                                                                                                                 | NA                               | rs200194110 | NA |
| chr2 | 38522144 | 38522144 | C        | -        | UTR3         | ATL2                        | NA                | NA                                                                                                                                                                                                                                                                                 | NA                               | NA          | NA |
| chr2 | 38522260 | 38522260 | A        | T        | UTR3         | ATL2                        | NA                | NA                                                                                                                                                                                                                                                                                 | NA                               | rs6987      | NA |
| chr2 | 43015719 | 43015719 | T        | C        | exonic       | HAAO                        | nonsynonymous SNV | HAAO:NM_012205:exon2:c.A109G:p.I37V                                                                                                                                                                                                                                                | NA                               | rs3816183   | NA |
| chr2 | 43019730 | 43019730 | A        | G        | UTR5         | HAAO                        | NA                | NA                                                                                                                                                                                                                                                                                 | NA                               | rs2304656   | NA |
| chr2 | 44036922 | 44036922 | T        | C        | UTR3         | DYNC2LI1                    | NA                | NA                                                                                                                                                                                                                                                                                 | NA                               | rs10186552  | NA |
| chr2 | 44546016 | 44546016 | C        | T        | UTR3         | PREPL                       | NA                | NA                                                                                                                                                                                                                                                                                 | NA                               | rs8410      | NA |
| chr2 | 44999604 | 44999604 | T        | -        | UTR3         | CAMKMT                      | NA                | NA                                                                                                                                                                                                                                                                                 | NA                               | rs199836049 | NA |
| chr2 | 45172416 | 45172416 | G        | A        | UTR3         | SIX3                        | NA                | NA                                                                                                                                                                                                                                                                                 | NA                               | NA          | NA |
| chr2 | 46746963 | 46746963 | A        | G        | UTR5         | ATP6V1E2                    | NA                | NA                                                                                                                                                                                                                                                                                 | NA                               | rs4952830   | NA |

|      |          |          |          |       |              |            |                   |                                                                  |                                        |             |    |
|------|----------|----------|----------|-------|--------------|------------|-------------------|------------------------------------------------------------------|----------------------------------------|-------------|----|
| chr2 | 46852121 | 46852121 | T        | -     | UTR3         | CRIP1      | NA                | NA                                                               | NA                                     | NA          | NA |
| chr2 | 46852211 | 46852211 | T        | -     | UTR3         | CRIP1      | NA                | NA                                                               | NA                                     | NA          | NA |
| chr2 | 50147836 | 50147843 | GTGTGTGT | -     | UTR3         | NRXN1      | NA                | NA                                                               | NA                                     | NA          | NA |
| chr2 | 54120025 | 54120025 | A        | T     | exonic       | PSME4      | nonsynonymous SNV | PSME4:NM_014614:exon36:c.T4111A:p.S1371T                         | NA                                     | rs805408    | NA |
| chr2 | 54532431 | 54532431 | T        | C     | UTR3         | ACYP2      | NA                | NA                                                               | NA                                     | rs17045807  | NA |
| chr2 | 54895818 | 54895818 | T        | -     | UTR3         | SPTBN1     | NA                | NA                                                               | NA                                     | rs201990044 | NA |
| chr2 | 55199932 | 55199932 | T        | -     | UTR3         | RTN4       | NA                | NA                                                               | NA                                     | NA          | NA |
| chr2 | 55402225 | 55402225 | C        | T     | UTR3         | CLHC1      | NA                | NA                                                               | NA                                     | rs1133182   | NA |
| chr2 | 58388696 | 58388696 | A        | G     | exonic       | FANCL      | synonymous SNV    | _001114636:exon12:c.T996C;p.S332S,FANCL:NM_018062:exon12:c.T996C | NA                                     | rs848291    | NA |
| chr2 | 64119863 | 64119863 | -        | T     | UTR3         | VPS54      | NA                | NA                                                               | NA                                     | NA          | NA |
| chr2 | 64819250 | 64819250 | A        | -     | UTR3         | AFTPH      | NA                | NA                                                               | NA                                     | rs200722568 | NA |
| chr2 | 65299085 | 65299085 | A        | C     | exonic       | CEP68      | synonymous SNV    | CEP68:NM_015147:exon3:c.A855C:p.S285S                            | NA                                     | NA          | NA |
| chr2 | 67637218 | 67637221 | TGAT     | -     | UTR3         | ETAA1      | NA                | NA                                                               | NA                                     | rs35271433  | NA |
| chr2 | 68358046 | 68358046 | C        | T     | UTR3         | WDR92      | NA                | NA                                                               | NA                                     | rs199882206 | NA |
| chr2 | 68406127 | 68406127 | -        | AAAAA | UTR3         | PPP3R1     | NA                | NA                                                               | NA                                     | NA          | NA |
| chr2 | 68406149 | 68406149 | G        | A     | UTR3         | PPP3R1     | NA                | NA                                                               | NA                                     | NA          | NA |
| chr2 | 68406155 | 68406155 | G        | A     | UTR3         | PPP3R1     | NA                | NA                                                               | NA                                     | rs201762572 | NA |
| chr2 | 69550811 | 69550811 | T        | -     | UTR3         | GFPT1      | NA                | NA                                                               | NA                                     | rs36057221  | NA |
| chr2 | 69689509 | 69689509 | A        | T     | UTR3         | AAK1       | NA                | NA                                                               | NA                                     | rs72833931  | NA |
| chr2 | 69689809 | 69689809 | A        | -     | UTR3         | AAK1       | NA                | NA                                                               | NA                                     | NA          | NA |
| chr2 | 71004492 | 71004492 | T        | C     | UTR3         | FIGLA      | NA                | NA                                                               | ID=COSN404629;OCCURENCE=1(lung)        | rs56316086  | NA |
| chr2 | 71004494 | 71004494 | A        | T     | UTR3         | FIGLA      | NA                | NA                                                               | ID=COSN404630;OCCURENCE=1(lung)        | rs56135050  | NA |
| chr2 | 71036190 | 71036190 | A        | -     | UTR3         | CLEC4F     | NA                | NA                                                               | NA                                     | rs149426278 | NA |
| chr2 | 71351487 | 71351487 | G        | A     | exonic       | MCEE       | nonsynonymous SNV | MCEE:NM_032601:exon2:c.C227T:p.A76V                              | NA                                     | rs11541017  | B  |
| chr2 | 72707874 | 72707874 | A        | G     | exonic       | EXOC6B     | synonymous SNV    | EXOC6B:NM_015189:exon17:c.T1671C:p.V557V                         | NA                                     | rs653220    | NA |
| chr2 | 74300717 | 74300717 | T        | C     | exonic       | TET3       | synonymous SNV    | TET3:NM_144993:exon2:c.T2131C:p.L711L                            | rs=COSM148878;OCCURENCE=1(stomach)     | rs7560668   | NA |
| chr2 | 75884989 | 75884989 | T        | -     | UTR3         | MRPL19     | NA                | NA                                                               | NA                                     | rs35072018  | NA |
| chr2 | 85549595 | 85549595 | T        | A     | UTR3         | TGOLN2     | NA                | NA                                                               | NA                                     | NA          | NA |
| chr2 | 85549650 | 85549650 | G        | C     | UTR3         | TGOLN2     | NA                | NA                                                               | NA                                     | NA          | NA |
| chr2 | 85776950 | 85776950 | A        | C     | UTR3         | GGCX       | NA                | NA                                                               | NA                                     | rs78909830  | NA |
| chr2 | 85833907 | 85833907 | T        | -     | UTR3         | C2orf68    | NA                | NA                                                               | NA                                     | NA          | NA |
| chr2 | 87012399 | 87012399 | -        | AA    | UTR3         | CD8A       | NA                | NA                                                               | NA                                     | NA          | NA |
| chr2 | 89065449 | 89065449 | G        | A     | ncRNA_exonic | ANKRD36BP2 | NA                | NA                                                               | NA                                     | rs113082666 | NA |
| chr2 | 91843471 | 91843471 | C        | T     | ncRNA_exonic | LOC654342  | NA                | NA                                                               | NA                                     | rs1048212   | NA |
| chr2 | 91963845 | 91963845 | G        | A     | ncRNA_exonic | GGT8P      | NA                | NA                                                               | NA                                     | NA          | NA |
| chr2 | 91963880 | 91963880 | A        | G     | ncRNA_exonic | GGT8P      | NA                | NA                                                               | NA                                     | rs114148846 | NA |
| chr2 | 91963899 | 91963899 | C        | T     | ncRNA_exonic | GGT8P      | NA                | NA                                                               | NA                                     | NA          | NA |
| chr2 | 91963908 | 91963908 | T        | G     | ncRNA_exonic | GGT8P      | NA                | NA                                                               | NA                                     | NA          | NA |
| chr2 | 91963953 | 91963953 | A        | G     | ncRNA_exonic | GGT8P      | NA                | NA                                                               | NA                                     | rs4622773   | NA |
| chr2 | 91970053 | 91970053 | A        | G     | ncRNA_exonic | GGT8P      | NA                | NA                                                               | NA                                     | rs200455966 | NA |
| chr2 | 91970089 | 91970089 | G        | C     | ncRNA_exonic | GGT8P      | NA                | NA                                                               | NA                                     | rs147452528 | NA |
| chr2 | 91970112 | 91970112 | C        | T     | ncRNA_exonic | GGT8P      | NA                | NA                                                               | NA                                     | rs139857385 | NA |
| chr2 | 92129194 | 92129194 | C        | T     | ncRNA_exonic | ACTR3BP2   | NA                | NA                                                               | NA                                     | rs12483966  | NA |
| chr2 | 95522747 | 95522747 | C        | G     | ncRNA_exonic | ANKRD20A8P | NA                | NA                                                               | NA                                     | rs10874467  | NA |
| chr2 | 96676301 | 96676301 | C        | A     | ncRNA_exonic | FAHD2CP    | NA                | NA                                                               | NA                                     | rs2443817   | NA |
| chr2 | 97808510 | 97808510 | G        | A     | exonic       | ANKRD36    | nonsynonymous SNV | ANKRD36:NM_001164315:exon8:c.G839A:p.G280D                       | NA                                     | rs199920970 | NA |
| chr2 | 97808515 | 97808515 | G        | A     | exonic       | ANKRD36    | nonsynonymous SNV | ANKRD36:NM_001164315:exon8:c.G844A:p.E282K                       | NA                                     | rs201265245 | NA |
| chr2 | 97808524 | 97808524 | A        | G     | exonic       | ANKRD36    | nonsynonymous SNV | ANKRD36:NM_001164315:exon8:c.A853G:p.I285V                       | NA                                     | rs202223019 | NA |
| chr2 | 97808529 | 97808529 | A        | G     | exonic       | ANKRD36    | synonymous SNV    | ANKRD36:NM_001164315:exon8:c.A858G:p.S286S                       | NA                                     | NA          | NA |
| chr2 | 97808562 | 97808562 | A        | C     | exonic       | ANKRD36    | nonsynonymous SNV | ANKRD36:NM_001164315:exon8:c.A891C:p.K297N                       | NA                                     | rs75359815  | NA |
| chr2 | 97815047 | 97815047 | T        | G     | exonic       | ANKRD36    | synonymous SNV    | ANKRD36:NM_001164315:exon12:c.T1050G:p.P350P                     | NA                                     | NA          | NA |
| chr2 | 97815050 | 97815050 | T        | C     | exonic       | ANKRD36    | synonymous SNV    | ANKRD36:NM_001164315:exon12:c.T1053C:p.D351D                     | NA                                     | rs2190034   | NA |
| chr2 | 97815051 | 97815051 | G        | A     | exonic       | ANKRD36    | nonsynonymous SNV | ANKRD36:NM_001164315:exon12:c.G1054A:p.A352T                     | NA                                     | rs200092365 | NA |
| chr2 | 97915895 | 97915895 | T        | C     | exonic       | ANKRD36    | synonymous SNV    | ANKRD36:NM_001164315:exon75:c.T5817C:p.F1939F                    | NA                                     | rs201565865 | NA |
| chr2 | 97915896 | 97915896 | G        | A     | exonic       | ANKRD36    | nonsynonymous SNV | ANKRD36:NM_001164315:exon75:c.G5818A:p.E1940K                    | NA                                     | rs199628660 | NA |
| chr2 | 98127653 | 98127653 | T        | G     | exonic       | ANKRD36B   | nonsynonymous SNV | ANKRD36B:NM_025190:exon39:c.A3668C:p.N1223T                      | NA                                     | rs62157161  | NA |
| chr2 | 98127659 | 98127659 | T        | C     | exonic       | ANKRD36B   | nonsynonymous SNV | ANKRD36B:NM_025190:exon39:c.A3662G:p.E1221G                      | NA                                     | NA          | NA |
| chr2 | 98128066 | 98128066 | A        | G     | exonic       | ANKRD36B   | synonymous SNV    | ANKRD36B:NM_025190:exon39:c.T3255C:p.V1085V                      | NA                                     | NA          | NA |
| chr2 | 98128128 | 98128128 | G        | A     | exonic       | ANKRD36B   | nonsynonymous SNV | ANKRD36B:NM_025190:exon39:c.C3193T:p.L1065F                      | NA                                     | rs75197050  | NA |
| chr2 | 98128364 | 98128364 | T        | C     | exonic       | ANKRD36B   | nonsynonymous SNV | ANKRD36B:NM_025190:exon39:c.A2957G:p.H986R                       | NA                                     | rs200630019 | NA |
| chr2 | 98128402 | 98128402 | C        | A     | exonic       | ANKRD36B   | nonsynonymous SNV | ANKRD36B:NM_025190:exon39:c.G2919T:p.K973N                       | NA                                     | rs111605455 | NA |
| chr2 | 98128421 | 98128421 | T        | C     | exonic       | ANKRD36B   | nonsynonymous SNV | ANKRD36B:NM_025190:exon39:c.A2900G:p.K967R                       | NA                                     | rs112192400 | NA |
| chr2 | 98128472 | 98128472 | C        | A     | exonic       | ANKRD36B   | nonsynonymous SNV | ANKRD36B:NM_025190:exon39:c.G2849T:p.R950L                       | NA                                     | rs200057888 | NA |
| chr2 | 99237792 | 99237792 | C        | T     | UTR3         | MGAT4A     | NA                | NA                                                               | NA                                     | rs11892744  | NA |
| chr2 | 1.07E+08 | 1.07E+08 | T        | A     | exonic       | RGPD3      | nonsynonymous SNV | RGPD3:NM_001144013:exon17:c.A2468T:p.K823M                       | rs=132759;OCCURENCE=1(central_nervous) | rs62152467  | NA |
| chr2 | 1.07E+08 | 1.07E+08 | C        | G     | exonic       | RGPD3      | nonsynonymous SNV | RGPD3:NM_001144013:exon16:c.G2233C:p.E745Q                       | NA                                     | rs143879890 | NA |



|      |          |          |        |      |              |           |                   |                                                                |                                  |             |    |
|------|----------|----------|--------|------|--------------|-----------|-------------------|----------------------------------------------------------------|----------------------------------|-------------|----|
| chr2 | 1.07E+08 | 1.07E+08 | C      | T    | exonic       | RGPD3     | nonsynonymous SNV | RGPD3:NM_001144013:exon4:c.G343A:p.E115K                       | NA                               | rs199932968 | NA |
| chr2 | 1.07E+08 | 1.07E+08 | AACAAC | -    | UTR3         | STGGAL2   | NA                | NA                                                             | NA                               | rs200860434 | NA |
| chr2 | 1.09E+08 | 1.09E+08 | T      | G    | UTR3         | RGPD4     | NA                | NA                                                             | NA                               | rs3202255   | NA |
| chr2 | 1.09E+08 | 1.09E+08 | G      | T    | UTR3         | RGPD4     | NA                | NA                                                             | NA                               | rs2439167   | NA |
| chr2 | 1.09E+08 | 1.09E+08 | T      | -    | UTR3         | SULT1C2   | NA                | NA                                                             | NA                               | rs35976654  | NA |
| chr2 | 1.09E+08 | 1.09E+08 | T      | -    | UTR3         | SULT1C4   | NA                | NA                                                             | NA                               | rs57444248  | NA |
| chr2 | 1.09E+08 | 1.09E+08 | C      | T    | UTR3         | GCC2      | NA                | NA                                                             | NA                               | rs1138412   | NA |
| chr2 | 1.1E+08  | 1.1E+08  | -      | T    | UTR3         | 10-Sep    | NA                | NA                                                             | NA                               | NA          | NA |
| chr2 | 1.1E+08  | 1.1E+08  | A      | -    | UTR3         | SOWAHC    | NA                | NA                                                             | NA                               | NA          | NA |
| chr2 | 1.12E+08 | 1.12E+08 | A      | G    | intronic     | ACOXL     | NA                | NA                                                             | NA                               | rs7558938   | NA |
| chr2 | 1.14E+08 | 1.14E+08 | A      | C    | exonic       | FOXD4L1   | nonsynonymous SNV | FOXD4L1:NM_012184:exon1:c.A145C:p.K49Q                         | NA                               | rs2757970   | B  |
| chr2 | 1.14E+08 | 1.14E+08 | A      | G    | ncRNA_exonic | WASH2P    | NA                | NA                                                             | NA                               | rs200864112 | NA |
| chr2 | 1.14E+08 | 1.14E+08 | C      | G    | ncRNA_exonic | WASH2P    | NA                | NA                                                             | SN404663,COSN404664;OCCURENCE=1  | rs1128453   | NA |
| chr2 | 1.14E+08 | 1.14E+08 | A      | G    | ncRNA_exonic | DDX11L2   | NA                | NA                                                             | 672,COSN404673,COSN404671;OCCURI | rs2747970   | NA |
| chr2 | 1.2E+08  | 1.2E+08  | T      | G    | UTR3         | EN1       | NA                | NA                                                             | NA                               | NA          | NA |
| chr2 | 1.21E+08 | 1.21E+08 | G      | A    | exonic       | EPB41L5   | nonsynonymous SNV | 01184937:exon17:c.G1384A:p.A462T,EPB41L5:NM_020909:exon17:c.C  | NA                               | rs1034489   | B  |
| chr2 | 1.21E+08 | 1.21E+08 | T      | C    | ncRNA_exonic | LOC84931  | NA                | NA                                                             | NA                               | rs1880544   | NA |
| chr2 | 1.22E+08 | 1.22E+08 | CACACA | -    | UTR3         | CLASP1    | NA                | NA                                                             | NA                               | NA          | NA |
| chr2 | 1.28E+08 | 1.28E+08 | TT     | -    | UTR3         | MAP3K2    | NA                | NA                                                             | NA                               | NA          | NA |
| chr2 | 1.28E+08 | 1.28E+08 | G      | T    | exonic       | PROC      | synonymous SNV    | PROC:NM_000312:exon6:c.G423T:p.S141S                           | NA                               | rs5936      | NA |
| chr2 | 1.29E+08 | 1.29E+08 | A      | -    | UTR3         | POLR2D    | NA                | NA                                                             | NA                               | NA          | NA |
| chr2 | 1.29E+08 | 1.29E+08 | C      | T    | UTR3         | HS6ST1    | NA                | NA                                                             | NA                               | rs35261195  | NA |
| chr2 | 1.29E+08 | 1.29E+08 | A      | C    | UTR3         | HS6ST1    | NA                | NA                                                             | NA                               | NA          | NA |
| chr2 | 1.29E+08 | 1.29E+08 | T      | C    | UTR3         | HS6ST1    | NA                | NA                                                             | NA                               | NA          | NA |
| chr2 | 1.31E+08 | 1.31E+08 | T      | C    | exonic       | POTEF     | nonsynonymous SNV | POTEF:NM_001099771:exon17:c.A2687G:p.H896R                     | NA                               | rs201946437 | NA |
| chr2 | 1.31E+08 | 1.31E+08 | C      | A    | exonic       | POTEF     | nonsynonymous SNV | POTEF:NM_001099771:exon17:c.G2601T:p.E867D                     | NA                               | rs2599794   | NA |
| chr2 | 1.32E+08 | 1.32E+08 | A      | G    | UTR5         | ARHGEF4   | NA                | NA                                                             | NA                               | rs3739127   | NA |
| chr2 | 1.32E+08 | 1.32E+08 | A      | -    | UTR3         | PLEKHB2   | NA                | NA                                                             | NA                               | NA          | NA |
| chr2 | 1.33E+08 | 1.33E+08 | G      | A    | ncRNA_exonic | ANKRD30BL | NA                | NA                                                             | NA                               | rs79828184  | NA |
| chr2 | 1.33E+08 | 1.33E+08 | A      | G    | ncRNA_exonic | ANKRD30BL | NA                | NA                                                             | NA                               | rs74546783  | NA |
| chr2 | 1.33E+08 | 1.33E+08 | C      | T    | ncRNA_exonic | ANKRD30BL | NA                | NA                                                             | NA                               | rs112570337 | NA |
| chr2 | 1.33E+08 | 1.33E+08 | G      | A    | ncRNA_exonic | ANKRD30BL | NA                | NA                                                             | NA                               | rs112577594 | NA |
| chr2 | 1.33E+08 | 1.33E+08 | T      | G    | ncRNA_exonic | ANKRD30BL | NA                | NA                                                             | NA                               | rs75692539  | NA |
| chr2 | 1.33E+08 | 1.33E+08 | -      | GGCG | ncRNA_exonic | ANKRD30BL | NA                | NA                                                             | NA                               | NA          | NA |
| chr2 | 1.36E+08 | 1.36E+08 | T      | G    | UTR5         | CCNT2     | NA                | NA                                                             | NA                               | NA          | NA |
| chr2 | 1.36E+08 | 1.36E+08 | A      | -    | UTR3         | RAB3GAP1  | NA                | NA                                                             | NA                               | rs200869351 | NA |
| chr2 | 1.39E+08 | 1.39E+08 | T      | G    | UTR5         | HNMT      | NA                | NA                                                             | ID=COSN404685;OCCURENCE=1(lung)  | NA          | NA |
| chr2 | 1.41E+08 | 1.41E+08 | C      | T    | exonic       | LRP1B     | synonymous SNV    | LRP1B:NM_018557:exon69:c.G10650A:p.E3550E                      | NA                               | rs16843864  | NA |
| chr2 | 1.41E+08 | 1.41E+08 | G      | A    | exonic       | LRP1B     | synonymous SNV    | LRP1B:NM_018557:exon55:c.C8823T:p.D2941D                       | NA                               | rs35296183  | NA |
| chr2 | 1.49E+08 | 1.49E+08 | A      | G    | UTR5         | ORC4      | NA                | NA                                                             | NA                               | rs897172    | NA |
| chr2 | 1.52E+08 | 1.52E+08 | G      | C    | UTR5         | NMI       | NA                | NA                                                             | NA                               | rs2194492   | NA |
| chr2 | 1.53E+08 | 1.53E+08 | AA     | -    | UTR3         | STAM2     | NA                | NA                                                             | NA                               | NA          | NA |
| chr2 | 1.56E+08 | 1.56E+08 | A      | C    | UTR5         | KCNJ3     | NA                | NA                                                             | NA                               | NA          | NA |
| chr2 | 1.57E+08 | 1.57E+08 | G      | C    | UTR3         | GPD2      | NA                | NA                                                             | NA                               | rs1991776   | NA |
| chr2 | 1.6E+08  | 1.6E+08  | G      | A    | UTR5         | WDSUB1    | NA                | NA                                                             | NA                               | rs58048811  | NA |
| chr2 | 1.66E+08 | 1.66E+08 | A      | T    | UTR5         | SCN2A     | NA                | NA                                                             | NA                               | rs76193610  | NA |
| chr2 | 1.67E+08 | 1.67E+08 | A      | C    | exonic       | CSRNP3    | nonsynonymous SNV | l_024969:exon3:c.A271C:p.T91P,CSRNP3:NM_001172173:exon5:c.A2   | NA                               | NA          | D  |
| chr2 | 1.7E+08  | 1.7E+08  | A      | G    | exonic       | NOSTRIN   | synonymous SNV    | i2946:exon15:c.A1188G:p.G396G,NOSTRIN:NM_001039724:exon16:c.;  | NA                               | rs3931      | NA |
| chr2 | 1.7E+08  | 1.7E+08  | G      | A    | UTR3         | LRP2      | NA                | NA                                                             | NA                               | NA          | NA |
| chr2 | 1.7E+08  | 1.7E+08  | T      | C    | exonic       | LRP2      | nonsynonymous SNV | LRP2:NM_004525:exon42:c.A7894G:p.N2632D                        | NA                               | rs17848169  | P  |
| chr2 | 1.72E+08 | 1.72E+08 | C      | G    | UTR3         | DCAF17    | NA                | NA                                                             | NA                               | rs17221367  | NA |
| chr2 | 1.77E+08 | 1.77E+08 | AAA    | -    | UTR3         | KIAA1715  | NA                | NA                                                             | NA                               | NA          | NA |
| chr2 | 1.78E+08 | 1.78E+08 | TA     | -    | UTR3         | AGPS      | NA                | NA                                                             | NA                               | NA          | NA |
| chr2 | 1.78E+08 | 1.78E+08 | T      | -    | UTR3         | PDE11A    | NA                | NA                                                             | NA                               | rs71010806  | NA |
| chr2 | 1.78E+08 | 1.78E+08 | C      | T    | UTR3         | PDE11A    | NA                | NA                                                             | NA                               | NA          | NA |
| chr2 | 1.79E+08 | 1.79E+08 | AA     | -    | ncRNA_UTR3   | OSBPL6    | NA                | NA                                                             | NA                               | NA          | NA |
| chr2 | 1.79E+08 | 1.79E+08 | G      | T    | exonic       | TTN       | nonsynonymous SNV | exon155:c.C60045A:p.S20015R,TTN:NM_133378:exon275:c.C78960A:   | NA                               | NA          | NA |
| chr2 | 1.79E+08 | 1.79E+08 | A      | T    | exonic       | TTN       | nonsynonymous SNV | :exon155:c.T60026A:p.I20009K,TTN:NM_133378:exon275:c.T78941A:; | NA                               | NA          | NA |
| chr2 | 1.79E+08 | 1.79E+08 | G      | T    | exonic       | TTN       | nonsynonymous SNV | :exon155:c.C60024A:p.H20008Q,TTN:NM_133378:exon275:c.C78939A:  | NA                               | NA          | NA |
| chr2 | 1.84E+08 | 1.84E+08 | G      | A    | exonic       | DNAJC10   | nonsynonymous SNV | l_001271581:exon4:c.G226A:p.D76N,DNAJC10:NM_018981:exon4:c.G   | NA                               | rs6729801   | B  |
| chr2 | 1.88E+08 | 1.88E+08 | AA     | -    | UTR3         | TFPI      | NA                | NA                                                             | NA                               | NA          | NA |
| chr2 | 1.88E+08 | 1.88E+08 | A      | -    | UTR3         | TFPI      | NA                | NA                                                             | NA                               | rs72023563  | NA |
| chr2 | 1.89E+08 | 1.89E+08 | T      | G    | intronic     | GULP1     | NA                | NA                                                             | NA                               | NA          | NA |
| chr2 | 1.89E+08 | 1.89E+08 | AA     | -    | UTR3         | GULP1     | NA                | NA                                                             | NA                               | NA          | NA |
| chr2 | 1.9E+08  | 1.9E+08  | A      | C    | exonic       | DIRC1     | nonsynonymous SNV | DIRC1:NM_052952:exon2:c.T151G:p.S51A                           | NA                               | rs72902678  | NA |
| chr2 | 1.91E+08 | 1.91E+08 | G      | A    | UTR5         | INPP1     | NA                | NA                                                             | NA                               | rs1372054   | NA |



|      |          |          |          |          |              |          |                         |                                                               |    |             |    |
|------|----------|----------|----------|----------|--------------|----------|-------------------------|---------------------------------------------------------------|----|-------------|----|
| chr2 | 1.92E+08 | 1.92E+08 | G        | A        | exonic       | MYO1B    | synonymous SNV          | JA:p.E490E,MYO1B:NM_001161819:exon16:c.G1470A:p.E490E,MYO1E   | NA | rs13018796  | NA |
| chr2 | 1.97E+08 | 1.97E+08 | TT       | -        | UTR3         | SLC39A10 | NA                      | NA                                                            | NA | NA          | NA |
| chr2 | 1.97E+08 | 1.97E+08 | -        | GTGGGGGC | UTR3         | STK17B   | NA                      | NA                                                            | NA | rs113084773 | NA |
| chr2 | 1.97E+08 | 1.97E+08 | C        | T        | UTR3         | STK17B   | NA                      | NA                                                            | NA | rs6745041   | NA |
| chr2 | 1.98E+08 | 1.98E+08 | T        | C        | exonic       | HSPD1    | synonymous SNV          | JM_002156:exon3:c.A273G:p.K91K,HSPD1:NM_199440:exon3:c.A273C  | NA | rs8539      | NA |
| chr2 | 1.99E+08 | 1.99E+08 | G        | A        | exonic       | RFTN2    | synonymous SNV          | RFTN2:NM_144629:exon3:c.C369T:p.L123L                         | NA | rs10497806  | NA |
| chr2 | 2E+08    | 2E+08    | G        | T        | UTR3         | SATB2    | NA                      | NA                                                            | NA | NA          | NA |
| chr2 | 2.01E+08 | 2.01E+08 | -        | T        | UTR3         | SPATS2L  | NA                      | NA                                                            | NA | NA          | NA |
| chr2 | 2.01E+08 | 2.01E+08 | A        | -        | UTR3         | SPATS2L  | NA                      | NA                                                            | NA | rs11313633  | NA |
| chr2 | 2.02E+08 | 2.02E+08 | -        | AT       | UTR3         | NDUFB3   | NA                      | NA                                                            | NA | rs150160270 | NA |
| chr2 | 2.02E+08 | 2.02E+08 | C        | T        | UTR3         | CASP8    | NA                      | NA                                                            | NA | rs2141331   | NA |
| chr2 | 2.02E+08 | 2.02E+08 | A        | -        | UTR3         | TRAK2    | NA                      | NA                                                            | NA | rs138690285 | NA |
| chr2 | 2.02E+08 | 2.02E+08 | A        | T        | exonic       | ALS2CR11 | nonsynonymous SNV       | J1168217:exon11:c.T1128A:p.H376Q,ALS2CR11:NM_001168221:exon1  | NA | rs10804117  | B  |
| chr2 | 2.03E+08 | 2.03E+08 | C        | T        | exonic       | ALS2     | synonymous SNV          | ALS2:NM_020919:exon25:c.G3885A:p.A1295A                       | NA | rs34946105  | NA |
| chr2 | 2.04E+08 | 2.04E+08 | A        | -        | UTR3         | ALS2CR8  | NA                      | NA                                                            | NA | NA          | NA |
| chr2 | 2.04E+08 | 2.04E+08 | C        | T        | exonic       | CYP20A1  | nonsynonymous SNV       | CYP20A1:NM_177538:exon10:c.C1036T:p.L346F                     | NA | rs1048013   | B  |
| chr2 | 2.04E+08 | 2.04E+08 | C        | A        | UTR3         | CYP20A1  | NA                      | NA                                                            | NA | NA          | NA |
| chr2 | 2.04E+08 | 2.04E+08 | T        | G        | UTR3         | CYP20A1  | NA                      | NA                                                            | NA | NA          | NA |
| chr2 | 2.04E+08 | 2.04E+08 | G        | A        | UTR3         | CYP20A1  | NA                      | NA                                                            | NA | rs62183912  | NA |
| chr2 | 2.04E+08 | 2.04E+08 | A        | C        | UTR3         | CYP20A1  | NA                      | NA                                                            | NA | rs6435181   | NA |
| chr2 | 2.04E+08 | 2.04E+08 | T        | -        | UTR3         | CYP20A1  | NA                      | NA                                                            | NA | rs11304494  | NA |
| chr2 | 2.04E+08 | 2.04E+08 | A        | -        | UTR3         | RAPH1    | NA                      | NA                                                            | NA | NA          | NA |
| chr2 | 2.06E+08 | 2.06E+08 | C        | T        | exonic       | PAR3B    | synonymous SNV          | 9T:p.A113A,PAR3B:NM_152526:exon3:c.C339T:p.A113A,PAR3B:NM     | NA | rs236843    | NA |
| chr2 | 2.07E+08 | 2.07E+08 | T        | C        | exonic       | NRP2     | synonymous SNV          | J_201264:exon6:c.T870C:p.N290N,NRP2:NM_201266:exon6:c.T870C:  | NA | rs2228639   | NA |
| chr2 | 2.07E+08 | 2.07E+08 | AA       | -        | UTR3         | INO80D   | NA                      | NA                                                            | NA | NA          | NA |
| chr2 | 2.07E+08 | 2.07E+08 | AAA      | -        | UTR3         | INO80D   | NA                      | NA                                                            | NA | NA          | NA |
| chr2 | 2.08E+08 | 2.08E+08 | -        | TGTG     | UTR3         | KLF7     | NA                      | NA                                                            | NA | rs113821778 | NA |
| chr2 | 2.08E+08 | 2.08E+08 | TCTT     | -        | UTR3         | CREB1    | NA                      | NA                                                            | NA | rs4025849   | NA |
| chr2 | 2.09E+08 | 2.09E+08 | AAG      | -        | UTR3         | FZD5     | NA                      | NA                                                            | NA | NA          | NA |
| chr2 | 2.09E+08 | 2.09E+08 | G        | -        | UTR3         | FZD5     | NA                      | NA                                                            | NA | NA          | NA |
| chr2 | 2.09E+08 | 2.09E+08 | G        | A        | UTR3         | FZD5     | NA                      | NA                                                            | NA | NA          | NA |
| chr2 | 2.09E+08 | 2.09E+08 | -        | T        | UTR3         | PLEKHM3  | NA                      | NA                                                            | NA | NA          | NA |
| chr2 | 2.11E+08 | 2.11E+08 | CACACA   | -        | UTR3         | MAP2     | NA                      | NA                                                            | NA | NA          | NA |
| chr2 | 2.11E+08 | 2.11E+08 | T        | G        | exonic       | ACADL    | nonsynonymous SNV       | ACADL:NM_001608:exon9:c.A997C:p.K333Q                         | NA | rs2286963   | D  |
| chr2 | 2.11E+08 | 2.11E+08 | -        | TCT      | exonic       | CPS1     | nonframeshift insertion | CPS1:NM_001122633:exon2:c.13_14insTCT:p.I5delinsIF            | NA | rs3835047   | NA |
| chr2 | 2.14E+08 | 2.14E+08 | -        | A        | UTR3         | IKZF2    | NA                      | NA                                                            | NA | rs11450321  | NA |
| chr2 | 2.18E+08 | 2.18E+08 | C        | T        | ncRNA_exonic | DIRC3    | NA                      | NA                                                            | NA | rs3732007   | NA |
| chr2 | 2.19E+08 | 2.19E+08 | C        | A        | exonic       | CTDSP1   | synonymous SNV          | C204A:p.G68G,CTDSP1:NM_021198:exon2:c.C204A:p.G68G,CTDSP1:NI  | NA | rs2227251   | NA |
| chr2 | 2.2E+08  | 2.2E+08  | A        | G        | UTR3         | PRKAG3   | NA                      | NA                                                            | NA | rs6436094   | NA |
| chr2 | 2.2E+08  | 2.2E+08  | G        | C        | exonic       | PRKAG3   | nonsynonymous SNV       | PRKAG3:NM_017431:exon3:c.C211G:p.P71A                         | NA | rs692243    | P  |
| chr2 | 2.2E+08  | 2.2E+08  | A        | C        | UTR3         | CDK5R2   | NA                      | NA                                                            | NA | rs142470311 | NA |
| chr2 | 2.2E+08  | 2.2E+08  | C        | T        | UTR3         | FAM134A  | NA                      | NA                                                            | NA | NA          | NA |
| chr2 | 2.2E+08  | 2.2E+08  | G        | T        | UTR3         | FAM134A  | NA                      | NA                                                            | NA | NA          | NA |
| chr2 | 2.2E+08  | 2.2E+08  | G        | T        | UTR3         | FAM134A  | NA                      | NA                                                            | NA | NA          | NA |
| chr2 | 2.2E+08  | 2.2E+08  | A        | C        | exonic       | CHPF     | nonsynonymous SNV       | _001195731:exon4:c.T791G:p.L264R,CHPF:NM_024536:exon4:c.T1277 | NA | NA          | D  |
| chr2 | 2.24E+08 | 2.24E+08 | T        | C        | exonic       | KCNE4    | synonymous SNV          | KCNE4:NM_080671:exon2:c.T417C:p.P139P                         | NA | rs10201907  | NA |
| chr2 | 2.25E+08 | 2.25E+08 | TT       | -        | UTR3         | AP1S3    | NA                      | NA                                                            | NA | NA          | NA |
| chr2 | 2.25E+08 | 2.25E+08 | A        | G        | UTR3         | AP1S3    | NA                      | NA                                                            | NA | NA          | NA |
| chr2 | 2.26E+08 | 2.26E+08 | TGG      | -        | UTR5         | NYAP2    | NA                      | NA                                                            | NA | rs10578238  | NA |
| chr2 | 2.28E+08 | 2.28E+08 | TA       | -        | UTR3         | IRS1     | NA                      | NA                                                            | NA | rs138636103 | NA |
| chr2 | 2.28E+08 | 2.28E+08 | A        | C        | exonic       | IRS1     | nonsynonymous SNV       | IRS1:NM_005544:exon1:c.T890G:p.V297G                          | NA | NA          | D  |
| chr2 | 2.28E+08 | 2.28E+08 | T        | G        | exonic       | IRS1     | nonsynonymous SNV       | IRS1:NM_005544:exon1:c.A833C:p.N278T                          | NA | NA          | P  |
| chr2 | 2.28E+08 | 2.28E+08 | C        | T        | exonic       | COL4A4   | synonymous SNV          | COL4A4:NM_000092:exon42:c.G4080A:p.P1360P                     | NA | rs2228556   | NA |
| chr2 | 2.28E+08 | 2.28E+08 | C        | T        | exonic       | COL4A4   | nonsynonymous SNV       | COL4A4:NM_000092:exon42:c.G3979A:p.V1327M                     | NA | rs2229813   | NA |
| chr2 | 2.28E+08 | 2.28E+08 | G        | A        | exonic       | COL4A4   | nonsynonymous SNV       | COL4A4:NM_000092:exon21:c.C1444T:p.P482S                      | NA | rs2229814   | B  |
| chr2 | 2.28E+08 | 2.28E+08 | TTTA     | -        | UTR3         | AGFG1    | NA                      | NA                                                            | NA | rs55924655  | NA |
| chr2 | 2.28E+08 | 2.28E+08 | G        | A        | UTR3         | C2orf83  | NA                      | NA                                                            | NA | NA          | NA |
| chr2 | 2.32E+08 | 2.32E+08 | T        | -        | UTR3         | B3GNT7   | NA                      | NA                                                            | NA | NA          | NA |
| chr2 | 2.33E+08 | 2.33E+08 | A        | G        | exonic       | ECEL1    | nonsynonymous SNV       | ECEL1:NM_004826:exon7:c.T1240C:p.S414P                        | NA | NA          | D  |
| chr2 | 2.34E+08 | 2.34E+08 | A        | G        | exonic       | DGKD     | nonsynonymous SNV       | _003648:exon9:c.A1007G:p.D336G,DGKD:NM_152879:exon10:c.A113G  | NA | rs73995951  | D  |
| chr2 | 2.35E+08 | 2.35E+08 | AAACAAAC | -        | UTR3         | HJURP    | NA                      | NA                                                            | NA | rs150635580 | NA |
| chr2 | 2.35E+08 | 2.35E+08 | -        | TTAT     | UTR3         | TRPM8    | NA                      | NA                                                            | NA | rs138810119 | NA |
| chr2 | 2.35E+08 | 2.35E+08 | T        | -        | UTR3         | ARL4C    | NA                      | NA                                                            | NA | rs11476419  | NA |
| chr2 | 2.38E+08 | 2.38E+08 | C        | G        | exonic       | COL6A3   | nonsynonymous SNV       | p.D2224H,COL6A3:NM_057167:exon38:c.G7873C:p.D2625H,COL6A3:NM  | NA | rs36104025  | D  |
| chr2 | 2.39E+08 | 2.39E+08 | C        | A        | exonic       | ESPNL    | synonymous SNV          | ESPNL:NM_194312:exon2:c.C403A:p.R135R                         | NA | rs34878344  | NA |
| chr2 | 2.39E+08 | 2.39E+08 | A        | C        | UTR3         | KLHL30   | NA                      | NA                                                            | NA | NA          | NA |

|      |          |          |          |           |              |                 |                         |                                                                                              |                                  |             |    |
|------|----------|----------|----------|-----------|--------------|-----------------|-------------------------|----------------------------------------------------------------------------------------------|----------------------------------|-------------|----|
| chr2 | 2.39E+08 | 2.39E+08 | G        | T         | ncRNA_exonic | LOC151174       | NA                      | NA                                                                                           | NA                               | NA          | NA |
| chr2 | 2.4E+08  | 2.4E+08  | -        | ATAGATAG  | UTR3         | HDAC4           | NA                      | NA                                                                                           | NA                               | NA          | NA |
| chr2 | 2.4E+08  | 2.4E+08  | G        | A         | exonic       | HDAC4           | synonymous SNV          | HDAC4:NM_006037:exon21:c.C2565T:p.P855P                                                      | NA                               | rs1063639   | NA |
| chr2 | 2.4E+08  | 2.4E+08  | T        | C         | exonic       | HDAC4           | synonymous SNV          | HDAC4:NM_006037:exon18:c.A2361G:p.T787T                                                      | NA                               | rs61752234  | NA |
| chr2 | 2.41E+08 | 2.41E+08 | T        | C         | exonic       | NDUFA10         | synonymous SNV          | NDUFA10:NM_004544:exon2:c.A105G:p.K35K                                                       | NA                               | rs2083411   | NA |
| chr2 | 2.41E+08 | 2.41E+08 | A        | G         | exonic       | PRR21           | synonymous SNV          | PRR21:NM_001080835:exon1:c.T969C:p.H323H                                                     | ID=COSM41568;OCCURENCE=1(lung)   | rs112962758 | NA |
| chr2 | 2.41E+08 | 2.41E+08 | C        | T         | exonic       | PRR21           | nonsynonymous SNV       | PRR21:NM_001080835:exon1:c.G964A:p.V322I                                                     | NA                               | rs141005183 | B  |
| chr2 | 2.41E+08 | 2.41E+08 | C        | T         | exonic       | PRR21           | nonsynonymous SNV       | PRR21:NM_001080835:exon1:c.G712A:p.V238I                                                     | NA                               | rs199895422 | NA |
| chr2 | 2.41E+08 | 2.41E+08 | A        | G         | exonic       | PRR21           | synonymous SNV          | PRR21:NM_001080835:exon1:c.T633C:p.H211H                                                     | NA                               | NA          | NA |
| chr2 | 2.41E+08 | 2.41E+08 | C        | T         | exonic       | PRR21           | nonsynonymous SNV       | PRR21:NM_001080835:exon1:c.G292A:p.V98I                                                      | 1129269,COSM1129268;OCCURENCE=1  | rs112152720 | B  |
| chr2 | 2.41E+08 | 2.41E+08 | A        | G         | exonic       | PRR21           | nonsynonymous SNV       | PRR21:NM_001080835:exon1:c.T181C:p.S61P                                                      | NA                               | rs74006013  | B  |
| chr2 | 2.41E+08 | 2.41E+08 | G        | A         | exonic       | ANKMY1          | nonsynonymous SNV       | ANKMY1:NM_016552:exon10:c.C1946T:p.T649M                                                     | NA                               | rs35044862  | B  |
| chr2 | 2.42E+08 | 2.42E+08 | C        | T         | exonic       | PASK            | nonsynonymous SNV       | _001252124:exon6:c.G748A:p.V250I,PASK:NM_015148:exon6:c.G748A/149119,COSM149120;OCCURENCE=1( | rs1470414                        | B           |    |
| chr2 | 2.42E+08 | 2.42E+08 | T        | G         | exonic       | HDLBP           | nonsynonymous SNV       | 24C:p.D775A,HDLBP:NM_005336:exon19:c.A2423C:p.D808A,HDLBP:N                                  | NA                               | NA          | D  |
| chr2 | 2.43E+08 | 2.43E+08 | G        | A         | UTR3         | GAL3ST2         | NA                      | NA                                                                                           | NA                               | rs744986    | NA |
| chr2 | 2.43E+08 | 2.43E+08 | T        | A         | ncRNA_exonic | LOC728323       | NA                      | NA                                                                                           | NA                               | rs1817840   | NA |
| chr2 | 2.43E+08 | 2.43E+08 | C        | T         | ncRNA_exonic | LOC728323       | NA                      | NA                                                                                           | NA                               | rs1817839   | NA |
| chr3 | 3151759  | 3151759  | C        | T         | UTR5         | IL5RA           | NA                      | NA                                                                                           | NA                               | rs2290608   | NA |
| chr3 | 5222488  | 5222488  | -        | AGGGGATAA | UTR3         | ARL8B           | NA                      | NA                                                                                           | NA                               | rs143599604 | NA |
| chr3 | 8615563  | 8615563  | A        | -         | ncRNA_exonic | LINC00312       | NA                      | NA                                                                                           | NA                               | rs5846604   | NA |
| chr3 | 8775661  | 8775661  | C        | T         | exonic       | CAV3            | synonymous SNV          | NM_001234:exon1:c.C99T:p.N33N,CAV3:NM_033337:exon1:c.C99T:p                                  | NA                               | rs1008642   | NA |
| chr3 | 9519364  | 9519365  | TT       | -         | UTR3         | SETD5           | NA                      | NA                                                                                           | NA                               | NA          | NA |
| chr3 | 9745687  | 9745687  | C        | A         | exonic       | CPNE9           | unknown                 | UNKNOWN                                                                                      | NA                               | NA          | P  |
| chr3 | 9862366  | 9862366  | G        | T         | exonic       | ARPC4-TLL3,TLL3 | synonymous SNV          | 25930:exon7:c.G1095T:p.P365P,ARPC4-TLL3:NM_001198793:exon8:c                                 | NA                               | NA          | NA |
| chr3 | 10284239 | 10284239 | A        | C         | UTR3         | IRAK2           | NA                      | NA                                                                                           | NA                               | NA          | NA |
| chr3 | 10443827 | 10443827 | G        | C         | exonic       | ATP2B2          | synonymous SNV          | _001001331:exon4:c.C603G:p.V201V,ATP2B2:NM_001683:exon4:c.C60                                | NA                               | rs13084776  | NA |
| chr3 | 14106084 | 14106084 | T        | C         | ncRNA_exonic | TPRXL           | NA                      | NA                                                                                           | NA                               | NA          | NA |
| chr3 | 14106117 | 14106117 | T        | C         | ncRNA_exonic | TPRXL           | NA                      | NA                                                                                           | NA                               | NA          | NA |
| chr3 | 14106258 | 14106258 | T        | C         | ncRNA_exonic | TPRXL           | NA                      | NA                                                                                           | NA                               | NA          | NA |
| chr3 | 14106285 | 14106285 | T        | C         | ncRNA_exonic | TPRXL           | NA                      | NA                                                                                           | NA                               | NA          | NA |
| chr3 | 14526667 | 14526667 | -        | GTGTGT    | UTR3         | SLC6A6          | NA                      | NA                                                                                           | NA                               | NA          | NA |
| chr3 | 14745857 | 14745857 | G        | A         | exonic       | C3orf20         | nonsynonymous SNV       | 6A:p.A176T,C3orf20:NM_001184958:exon7:c.G526A:p.A176T,C3orf20                                | NA                               | rs17040196  | B  |
| chr3 | 18427924 | 18427924 | G        | T         | exonic       | SATB1           | synonymous SNV          | 36A:p.P462P,SATB1:NM_001195470:exon8:c.C1386A:p.P462P,SATB1:N                                | NA                               | rs2229261   | NA |
| chr3 | 18465235 | 18465235 | A        | -         | UTR5         | SATB1           | NA                      | NA                                                                                           | NA                               | rs3838737   | NA |
| chr3 | 19962044 | 19962044 | G        | A         | exonic       | EFHB            | nonsynonymous SNV       | EFHB:NM_144715:exon2:c.C805T:p.P269S                                                         | NA                               | rs13078867  | NA |
| chr3 | 19988758 | 19988758 | -        | CGG       | UTR5         | RAB5A           | NA                      | NA                                                                                           | NA                               | NA          | NA |
| chr3 | 20212189 | 20212189 | A        | G         | UTR3         | SGOL1           | NA                      | NA                                                                                           | NA                               | rs1052930   | NA |
| chr3 | 21448109 | 21448109 | A        | C         | ncRNA_exonic | VENTXP7         | NA                      | NA                                                                                           | NA                               | NA          | NA |
| chr3 | 21448155 | 21448155 | G        | T         | ncRNA_exonic | VENTXP7         | NA                      | NA                                                                                           | NA                               | NA          | NA |
| chr3 | 21448176 | 21448181 | AAAAAA   | -         | ncRNA_exonic | VENTXP7         | NA                      | NA                                                                                           | NA                               | NA          | NA |
| chr3 | 27414561 | 27414561 | -        | A         | UTR3         | SLC4A7          | NA                      | NA                                                                                           | NA                               | NA          | NA |
| chr3 | 29322966 | 29322966 | -        | T         | UTR5         | RBMS3           | NA                      | NA                                                                                           | NA                               | NA          | NA |
| chr3 | 33174156 | 33174156 | T        | G         | exonic       | CRTAP           | synonymous SNV          | CRTAP:NM_006371:exon5:c.T1032G:p.T344T                                                       | rs=COSM149349;OCCURENCE=1(stomac | rs1135127   | NA |
| chr3 | 33174168 | 33174168 | G        | A         | exonic       | CRTAP           | synonymous SNV          | CRTAP:NM_006371:exon5:c.G1044A:p.S348S                                                       | NA                               | rs1135128   | NA |
| chr3 | 33188385 | 33188385 | A        | -         | UTR3         | CRTAP           | NA                      | NA                                                                                           | NA                               | rs57153345  | NA |
| chr3 | 33430960 | 33430960 | T        | G         | UTR3         | UBP1            | NA                      | NA                                                                                           | NA                               | NA          | NA |
| chr3 | 37028931 | 37028931 | -        | T         | UTR3         | EPM2AIP1        | NA                      | NA                                                                                           | NA                               | rs199570773 | NA |
| chr3 | 37030404 | 37030404 | A        | -         | UTR3         | EPM2AIP1        | NA                      | NA                                                                                           | NA                               | NA          | NA |
| chr3 | 38179998 | 38179998 | A        | C         | UTR5         | MYD88           | NA                      | NA                                                                                           | NA                               | NA          | NA |
| chr3 | 38493852 | 38493852 | C        | A         | ncRNA_exonic | ACVR2B-AS1      | NA                      | NA                                                                                           | NA                               | rs3762788   | NA |
| chr3 | 38534223 | 38534258 | ACACACAC | -         | UTR3         | ACVR2B          | NA                      | NA                                                                                           | NA                               | NA          | NA |
| chr3 | 38908944 | 38908944 | T        | C         | exonic       | SCN11A          | synonymous SNV          | SCN11A:NM_014139:exon23:c.A3819G:p.E1273E                                                    | NA                               | rs148945365 | NA |
| chr3 | 39186728 | 39186728 | C        | T         | exonic       | CSRNP1          | synonymous SNV          | CSRNP1:NM_033027:exon3:c.G225A:p.R75R                                                        | NA                               | rs784517    | NA |
| chr3 | 39521532 | 39521532 | A        | -         | UTR5         | MOBP            | NA                      | NA                                                                                           | NA                               | NA          | NA |
| chr3 | 39556457 | 39556468 | GTGTGTGT | -         | UTR3         | MOBP            | NA                      | NA                                                                                           | NA                               | rs147433364 | NA |
| chr3 | 40503520 | 40503520 | -        | CTGCTGCTC | exonic       | RPL14           | nonframeshift insertion | 46insCTGCTGCTG:p.T149delinsTAAA,RPL14:NM_003973:exon6:c.445_                                 | NA                               | NA          | NA |
| chr3 | 41281412 | 41281412 | -        | T         | UTR3         | CTNNB1          | NA                      | NA                                                                                           | NA                               | rs34653633  | NA |
| chr3 | 41877414 | 41877414 | T        | C         | exonic       | ULK4            | nonsynonymous SNV       | ULK4:NM_017886:exon18:c.A1706G:p.K569R                                                       | NA                               | rs3774372   | P  |
| chr3 | 42706403 | 42706403 | T        | G         | UTR3         | ZBTB47          | NA                      | NA                                                                                           | NA                               | NA          | NA |
| chr3 | 42825115 | 42825115 | C        | T         | UTR3         | HIGD1A          | NA                      | NA                                                                                           | NA                               | rs6442067   | NA |
| chr3 | 42825568 | 42825569 | AA       | -         | UTR3         | HIGD1A          | NA                      | NA                                                                                           | NA                               | NA          | NA |
| chr3 | 45077441 | 45077441 | G        | T         | UTR3         | CLEC3B          | NA                      | NA                                                                                           | NA                               | NA          | NA |
| chr3 | 45153708 | 45153708 | G        | A         | exonic       | CDCP1           | synonymous SNV          | NM_022842:exon3:c.C522T:p.I174I,CDCP1:NM_178181:exon3:c.C522I                                | NA                               | rs35501071  | NA |
| chr3 | 46501213 | 46501213 | T        | C         | exonic       | LTF             | nonsynonymous SNV       | IM_001199149:exon2:c.A8G:p.K3R,LTF:NM_002343:exon2:c.A140G:p.                                | NA                               | rs1126478   | B  |
| chr3 | 46501268 | 46501268 | C        | T         | exonic       | LTF             | nonsynonymous SNV       | LTF:NM_002343:exon2:c.G85A:p.A29T                                                            | NA                               | rs1126477   | B  |
| chr3 | 46501284 | 46501284 | -        | CTT       | exonic       | LTF             | nonframeshift insertion | LTF:NM_002343:exon2:c.69_70insAAG:p.R23delinsRR                                              | NA                               | rs10662431  | NA |

|      |          |          |        |    |              |          |                     |                                                                                              |                                    |             |    |
|------|----------|----------|--------|----|--------------|----------|---------------------|----------------------------------------------------------------------------------------------|------------------------------------|-------------|----|
| chr3 | 46945263 | 46945263 | -      | A  | UTR3         | PTH1R    | NA                  | NA                                                                                           | NA                                 | NA          | NA |
| chr3 | 48016254 | 48016254 | -      | A  | UTR3         | MAP4     | NA                  | NA                                                                                           | NA                                 | NA          | NA |
| chr3 | 48419897 | 48419897 | C      | T  | exonic       | FBXW12   | nonsynonymous SNV   | _001159929:exon5:c.C439T:p.R147W,FBXW12:NM_207102:exon6:c.C4                                 | NA                                 | rs6442117   | P  |
| chr3 | 48485493 | 48485493 | A      | G  | UTR3         | TMA7     | NA                  | NA                                                                                           | NA                                 | rs7126      | NA |
| chr3 | 49067296 | 49067296 | A      | -  | UTR3         | QRICH1   | NA                  | NA                                                                                           | NA                                 | NA          | NA |
| chr3 | 49273996 | 49273996 | C      | T  | exonic       | CCDC36   | synonymous SNV      | NM_001135197:exon3:c.C72T:p.S24S,CCDC36:NM_178173:exon5:c.C7                                 | NA                                 | rs12631989  | NA |
| chr3 | 49315576 | 49315576 | T      | -  | UTR3         | USP4     | NA                  | NA                                                                                           | NA                                 | rs11309567  | NA |
| chr3 | 49395674 | 49395679 | GCCGCC | -  | exonic       | GPX1     | unknown             | UNKNOWN                                                                                      | D=COSM446703;OCCURENCE=1(breast    | rs28362588  | NA |
| chr3 | 49723823 | 49723823 | A      | G  | exonic       | MST1     | synonymous SNV      | MST1:NM_020998:exon8:c.T939C:p.T313T                                                         | NA                                 | rs7431215   | NA |
| chr3 | 50306752 | 50306752 | -      | C  | exonic       | SEMA3B   | unknown             | UNKNOWN                                                                                      | NA                                 | rs112058630 | NA |
| chr3 | 52407041 | 52407041 | C      | T  | exonic       | DNAH1    | synonymous SNV      | DNAH1:NM_015512:exon44:c.C6957T:p.H2319H                                                     | NA                                 | rs1546737   | NA |
| chr3 | 53226653 | 53226653 | -      | AA | UTR3         | PRKCD    | NA                  | NA                                                                                           | NA                                 | NA          | NA |
| chr3 | 53321361 | 53321365 | TTTTT  | -  | UTR3         | DPC1A    | NA                  | NA                                                                                           | NA                                 | NA          | NA |
| chr3 | 54354510 | 54354510 | T      | C  | exonic       | CACNA2D3 | synonymous SNV      | CACNA2D3:NM_018398:exon3:c.T246C:p.I82I                                                      | NA                                 | rs9879885   | NA |
| chr3 | 54952397 | 54952397 | G      | A  | UTR3         | LRTM1    | NA                  | NA                                                                                           | NA                                 | NA          | NA |
| chr3 | 54952419 | 54952419 | C      | A  | UTR3         | LRTM1    | NA                  | NA                                                                                           | NA                                 | NA          | NA |
| chr3 | 55502166 | 55502166 | -      | A  | UTR3         | WNT5A    | NA                  | NA                                                                                           | NA                                 | NA          | NA |
| chr3 | 57401178 | 57401178 | G      | C  | exonic       | DNAH12   | nonsynonymous SNV   | DNAH12:NM_178504:exon38:c.C5771G:p.A1924G                                                    | NA                                 | rs140326175 | NA |
| chr3 | 57430988 | 57430988 | G      | A  | exonic       | DNAH12   | synonymous SNV      | DNAH12:NM_178504:exon28:c.C4269T:p.Y1423Y                                                    | NA                                 | rs6768943   | NA |
| chr3 | 57857404 | 57857404 | C      | T  | exonic       | SLMAP    | nonsynonymous SNV   | SLMAP:NM_007159:exon11:c.C1177T:p.H393Y                                                      | NA                                 | NA          | P  |
| chr3 | 58304608 | 58304608 | C      | G  | UTR3         | RPP14    | NA                  | NA                                                                                           | NA                                 | rs3210776   | NA |
| chr3 | 59908126 | 59908126 | A      | G  | exonic       | FHIT     | synonymous SNV      | 1_001166243:exon8:c.T294C:p.H98H,FHIT:NM_002012:exon8:c.T294C)=COSM149406;OCCURENCE=1(stomac | rs1385816                          | NA          | NA |
| chr3 | 63985905 | 63985905 | T      | A  | UTR3         | ATXN7    | NA                  | NA                                                                                           | NA                                 | NA          | NA |
| chr3 | 63985952 | 63985952 | T      | G  | UTR3         | ATXN7    | NA                  | NA                                                                                           | NA                                 | NA          | NA |
| chr3 | 63985956 | 63985956 | T      | G  | UTR3         | ATXN7    | NA                  | NA                                                                                           | NA                                 | NA          | NA |
| chr3 | 63988880 | 63988880 | G      | T  | UTR3         | ATXN7    | NA                  | NA                                                                                           | NA                                 | NA          | NA |
| chr3 | 64672480 | 64672480 | T      | G  | exonic       | ADAMTS9  | nonsynonymous SNV   | ADAMTS9:NM_182920:exon2:c.A280C:p.T94P                                                       | NA                                 | NA          | P  |
| chr3 | 65346027 | 65346027 | T      | -  | UTR3         | MAGI1    | NA                  | NA                                                                                           | NA                                 | NA          | NA |
| chr3 | 66271429 | 66271429 | A      | C  | UTR5         | SLC25A26 | NA                  | NA                                                                                           | NA                                 | NA          | NA |
| chr3 | 67048762 | 67048762 | T      | C  | UTR5         | KBTBD8   | NA                  | NA                                                                                           | NA                                 | rs4856833   | NA |
| chr3 | 69070836 | 69070836 | -      | T  | UTR3         | TMF1     | NA                  | NA                                                                                           | NA                                 | NA          | NA |
| chr3 | 71007806 | 71007806 | T      | A  | UTR3         | FOXP1    | NA                  | NA                                                                                           | NA                                 | NA          | NA |
| chr3 | 71007843 | 71007843 | T      | C  | UTR3         | FOXP1    | NA                  | NA                                                                                           | NA                                 | NA          | NA |
| chr3 | 72426068 | 72426068 | T      | A  | UTR3         | RYBP     | NA                  | NA                                                                                           | NA                                 | rs13065475  | NA |
| chr3 | 72427252 | 72427252 | -      | T  | UTR3         | RYBP     | NA                  | NA                                                                                           | NA                                 | rs11455962  | NA |
| chr3 | 74344356 | 74344356 | T      | G  | exonic       | CNTN3    | synonymous SNV      | CNTN3:NM_020872:exon18:c.A2433C:p.A811A                                                      | NA                                 | rs10490832  | NA |
| chr3 | 75713507 | 75713507 | C      | T  | ncRNA_exonic | FLJ20518 | NA                  | NA                                                                                           | NA                                 | rs199666615 | NA |
| chr3 | 75715734 | 75715734 | G      | A  | ncRNA_exonic | FLJ20518 | NA                  | NA                                                                                           | NA                                 | rs138571914 | NA |
| chr3 | 75716122 | 75716122 | T      | C  | ncRNA_exonic | FLJ20518 | NA                  | NA                                                                                           | NA                                 | rs139598107 | NA |
| chr3 | 75786042 | 75786042 | G      | A  | exonic       | ZNF717   | nonsynonymous SNV   | ZNF717:NM_001128223:exon5:c.C2732T:p.S911F                                                   | NA                                 | rs140243156 | NA |
| chr3 | 75786288 | 75786288 | A      | G  | exonic       | ZNF717   | nonsynonymous SNV   | ZNF717:NM_001128223:exon5:c.T2486C:p.L829P                                                   | l191698;OCCURENCE=1(central_nervou | rs147227180 | NA |
| chr3 | 75786866 | 75786866 | G      | T  | exonic       | ZNF717   | synonymous SNV      | ZNF717:NM_001128223:exon5:c.C1908A:p.T636T                                                   | NA                                 | rs79516801  | NA |
| chr3 | 75787099 | 75787100 | CT     | -  | exonic       | ZNF717   | frameshift deletion | ZNF717:NM_001128223:exon5:c.1674_1675del:p.558_559del                                        | l192025;OCCURENCE=1(central_nervou | rs146514807 | NA |
| chr3 | 75787202 | 75787202 | G      | T  | exonic       | ZNF717   | synonymous SNV      | ZNF717:NM_001128223:exon5:c.C1572A:p.V524V                                                   | NA                                 | rs76713735  | NA |
| chr3 | 75787204 | 75787204 | C      | A  | exonic       | ZNF717   | nonsynonymous SNV   | ZNF717:NM_001128223:exon5:c.G1570T:p.V524F                                                   | NA                                 | rs75063165  | NA |
| chr3 | 75787208 | 75787208 | G      | A  | exonic       | ZNF717   | synonymous SNV      | ZNF717:NM_001128223:exon5:c.C1566T:p.L522L                                                   | NA                                 | rs79982156  | NA |
| chr3 | 75787225 | 75787225 | G      | A  | exonic       | ZNF717   | nonsynonymous SNV   | ZNF717:NM_001128223:exon5:c.C1549T:p.R517C                                                   | NA                                 | NA          | NA |
| chr3 | 75787228 | 75787228 | A      | C  | exonic       | ZNF717   | nonsynonymous SNV   | ZNF717:NM_001128223:exon5:c.T1546G:p.F516V                                                   | NA                                 | rs202139504 | NA |
| chr3 | 75787235 | 75787235 | C      | T  | exonic       | ZNF717   | synonymous SNV      | ZNF717:NM_001128223:exon5:c.G1539A:p.G513G                                                   | NA                                 | rs200228654 | NA |
| chr3 | 75787251 | 75787251 | T      | C  | exonic       | ZNF717   | nonsynonymous SNV   | ZNF717:NM_001128223:exon5:c.A1523G:p.E508G                                                   | NA                                 | NA          | NA |
| chr3 | 75787253 | 75787253 | G      | A  | exonic       | ZNF717   | synonymous SNV      | ZNF717:NM_001128223:exon5:c.C1521T:p.Y507Y                                                   | NA                                 | NA          | NA |
| chr3 | 75787265 | 75787265 | C      | G  | exonic       | ZNF717   | synonymous SNV      | ZNF717:NM_001128223:exon5:c.G1509C:p.G503G                                                   | NA                                 | rs144538707 | NA |
| chr3 | 75787305 | 75787305 | C      | T  | exonic       | ZNF717   | nonsynonymous SNV   | ZNF717:NM_001128223:exon5:c.G1469A:p.R490H                                                   | NA                                 | rs77389541  | NA |
| chr3 | 75787353 | 75787353 | G      | A  | exonic       | ZNF717   | nonsynonymous SNV   | ZNF717:NM_001128223:exon5:c.C1421T:p.T474I                                                   | NA                                 | rs141733687 | NA |
| chr3 | 75787405 | 75787405 | C      | T  | exonic       | ZNF717   | nonsynonymous SNV   | ZNF717:NM_001128223:exon5:c.G1369A:p.G457R                                                   | NA                                 | rs141106119 | NA |
| chr3 | 75787427 | 75787427 | T      | C  | exonic       | ZNF717   | synonymous SNV      | ZNF717:NM_001128223:exon5:c.A1347G:p.K449K                                                   | NA                                 | rs199721002 | NA |
| chr3 | 75787712 | 75787712 | G      | A  | exonic       | ZNF717   | synonymous SNV      | ZNF717:NM_001128223:exon5:c.C1062T:p.L354L                                                   | NA                                 | NA          | NA |
| chr3 | 75787725 | 75787725 | C      | T  | exonic       | ZNF717   | nonsynonymous SNV   | ZNF717:NM_001128223:exon5:c.G1049A:p.R350H                                                   | NA                                 | rs186706183 | NA |
| chr3 | 75787729 | 75787729 | G      | A  | exonic       | ZNF717   | nonsynonymous SNV   | ZNF717:NM_001128223:exon5:c.C1045T:p.R349C                                                   | NA                                 | NA          | NA |
| chr3 | 75788088 | 75788088 | C      | T  | exonic       | ZNF717   | nonsynonymous SNV   | ZNF717:NM_001128223:exon5:c.G686A:p.R229K                                                    | NA                                 | rs151216671 | NA |
| chr3 | 75788199 | 75788199 | T      | C  | exonic       | ZNF717   | nonsynonymous SNV   | ZNF717:NM_001128223:exon5:c.A575G:p.H192R                                                    | NA                                 | rs146090776 | NA |
| chr3 | 97517180 | 97517180 | C      | A  | UTR3         | ARL6     | NA                  | NA                                                                                           | NA                                 | NA          | NA |
| chr3 | 98304467 | 98304467 | T      | C  | exonic       | CPOX     | synonymous SNV      | CPOX:NM_000097:exon5:c.A990G:p.E330E                                                         | NA                                 | rs1729995   | NA |
| chr3 | 98515882 | 98515883 | AA     | -  | UTR3         | DCBLD2   | NA                  | NA                                                                                           | NA                                 | NA          | NA |
| chr3 | 1.01E+08 | 1.01E+08 | T      | A  | exonic       | SENP7    | nonsynonymous SNV   | 1077203:exon12:c.A1641T:p.Q547H,SENP7:NM_020654:exon13:c.A1=COSM1130394;OCCURENCE=1(prostat  | rs2433031                          | P           | NA |
| chr3 | 1.08E+08 | 1.08E+08 | AA     | -  | UTR3         | BBX      | NA                  | NA                                                                                           | NA                                 | NA          | NA |

|      |          |          |     |          |              |              |                   |                                                               |    |             |    |
|------|----------|----------|-----|----------|--------------|--------------|-------------------|---------------------------------------------------------------|----|-------------|----|
| chr3 | 1.08E+08 | 1.08E+08 | A   | -        | UTR3         | BBX          | NA                | NA                                                            | NA | NA          | NA |
| chr3 | 1.11E+08 | 1.11E+08 | -   | TGACTTAT | intronic     | PLCXD2       | NA                | NA                                                            | NA | NA          | NA |
| chr3 | 1.12E+08 | 1.12E+08 | A   | G        | UTR3         | ABHD10       | NA                | NA                                                            | NA | rs1127853   | NA |
| chr3 | 1.12E+08 | 1.12E+08 | T   | G        | UTR5         | TAGLN3       | NA                | NA                                                            | NA | NA          | NA |
| chr3 | 1.13E+08 | 1.13E+08 | A   | -        | UTR3         | GTPBP8       | NA                | NA                                                            | NA | rs200301737 | NA |
| chr3 | 1.13E+08 | 1.13E+08 | -   | T        | UTR3         | BOC          | NA                | NA                                                            | NA | NA          | NA |
| chr3 | 1.13E+08 | 1.13E+08 | A   | T        | UTR3         | BOC          | NA                | NA                                                            | NA | rs5022662   | NA |
| chr3 | 1.14E+08 | 1.14E+08 | G   | A        | UTR3         | ZNF80        | NA                | NA                                                            | NA | NA          | NA |
| chr3 | 1.14E+08 | 1.14E+08 | A   | C        | UTR3         | ZNF80        | NA                | NA                                                            | NA | NA          | NA |
| chr3 | 1.14E+08 | 1.14E+08 | C   | A        | UTR3         | ZNF80        | NA                | NA                                                            | NA | NA          | NA |
| chr3 | 1.14E+08 | 1.14E+08 | T   | A        | UTR3         | ZNF80        | NA                | NA                                                            | NA | NA          | NA |
| chr3 | 1.19E+08 | 1.19E+08 | C   | G        | exonic       | C3orf30      | nonsynonymous SNV | C3orf30:NM_152539:exon2:c.C1419G:p.D473E                      | NA | rs9289122   | B  |
| chr3 | 1.19E+08 | 1.19E+08 | T   | -        | UTR3         | PLA1A        | NA                | NA                                                            | NA | NA          | NA |
| chr3 | 1.21E+08 | 1.21E+08 | T   | C        | UTR3         | GTF2E1       | NA                | NA                                                            | NA | rs55697401  | NA |
| chr3 | 1.21E+08 | 1.21E+08 | T   | C        | exonic       | POLQ         | nonsynonymous SNV | POLQ:NM_199420:exon28:c.A7538G:p.Q2513R                       | NA | rs1381057   | NA |
| chr3 | 1.21E+08 | 1.21E+08 | T   | C        | UTR3         | ARGFX        | NA                | NA                                                            | NA | rs11711973  | NA |
| chr3 | 1.21E+08 | 1.21E+08 | T   | G        | UTR3         | ARGFX        | NA                | NA                                                            | NA | rs11712050  | NA |
| chr3 | 1.21E+08 | 1.21E+08 | AT  | -        | UTR3         | ARGFX        | NA                | NA                                                            | NA | rs3044706   | NA |
| chr3 | 1.22E+08 | 1.22E+08 | A   | G        | UTR3         | CASR         | NA                | NA                                                            | NA | rs9740      | NA |
| chr3 | 1.22E+08 | 1.22E+08 | A   | T        | UTR3         | CCDC58       | NA                | NA                                                            | NA | rs73855768  | NA |
| chr3 | 1.22E+08 | 1.22E+08 | -   | A        | UTR3         | KPNA1        | NA                | NA                                                            | NA | NA          | NA |
| chr3 | 1.22E+08 | 1.22E+08 | G   | A        | UTR3         | DTX3L        | NA                | NA                                                            | NA | rs73192142  | NA |
| chr3 | 1.22E+08 | 1.22E+08 | A   | C        | UTR3         | DTX3L        | NA                | NA                                                            | NA | NA          | NA |
| chr3 | 1.22E+08 | 1.22E+08 | T   | -        | UTR3         | DTX3L        | NA                | NA                                                            | NA | NA          | NA |
| chr3 | 1.23E+08 | 1.23E+08 | T   | A        | ncRNA_exonic | LOC100129550 | NA                | NA                                                            | NA | rs28375649  | NA |
| chr3 | 1.24E+08 | 1.24E+08 | C   | A        | UTR3         | CCDC14       | NA                | NA                                                            | NA | NA          | NA |
| chr3 | 1.24E+08 | 1.24E+08 | G   | A        | exonic       | KALRN        | synonymous SNV    | J07064:exon2:c.G135A:p.V45V,KALRN:NM_001024660:exon35:c.G522  | NA | rs1708303   | NA |
| chr3 | 1.24E+08 | 1.24E+08 | T   | C        | exonic       | KALRN        | synonymous SNV    | _007064:exon2:c.T243C:p.L81L,KALRN:NM_001024660:exon35:c.T533 | NA | rs1660038   | NA |
| chr3 | 1.26E+08 | 1.26E+08 | G   | C        | UTR5         | ROPN1B       | NA                | NA                                                            | NA | NA          | NA |
| chr3 | 1.26E+08 | 1.26E+08 | T   | G        | UTR5         | ROPN1B       | NA                | NA                                                            | NA | NA          | NA |
| chr3 | 1.26E+08 | 1.26E+08 | G   | A        | UTR3         | KLF15        | NA                | NA                                                            | NA | rs190340804 | NA |
| chr3 | 1.26E+08 | 1.26E+08 | T   | -        | UTR3         | ZXDC         | NA                | NA                                                            | NA | NA          | NA |
| chr3 | 1.26E+08 | 1.26E+08 | G   | A        | UTR3         | ZXDC         | NA                | NA                                                            | NA | rs813556    | NA |
| chr3 | 1.28E+08 | 1.28E+08 | C   | T        | ncRNA_UTR5   | DNAJB8       | NA                | NA                                                            | NA | rs12634139  | NA |
| chr3 | 1.28E+08 | 1.28E+08 | C   | A        | UTR5         | GATA2        | NA                | NA                                                            | NA | rs1806462   | NA |
| chr3 | 1.28E+08 | 1.28E+08 | T   | -        | UTR3         | C3orf27      | NA                | NA                                                            | NA | rs200346912 | NA |
| chr3 | 1.29E+08 | 1.29E+08 | -   | T        | UTR3         | COPG1        | NA                | NA                                                            | NA | rs35073725  | NA |
| chr3 | 1.29E+08 | 1.29E+08 | C   | T        | exonic       | EFCAB12      | nonsynonymous SNV | EFCAB12:NM_207307:exon3:c.G590A:p.R197H                       | NA | rs62266958  | NA |
| chr3 | 1.29E+08 | 1.29E+08 | G   | A        | UTR5         | EFCAB12      | NA                | NA                                                            | NA | rs3796391   | NA |
| chr3 | 1.29E+08 | 1.29E+08 | T   | -        | UTR3         | RHO          | NA                | NA                                                            | NA | rs11359208  | NA |
| chr3 | 1.3E+08  | 1.3E+08  | G   | A        | exonic       | ALG1L2       | synonymous SNV    | ALG1L2:NM_001136152:exon2:c.G45A:p.P15P                       | NA | rs6804080   | NA |
| chr3 | 1.3E+08  | 1.3E+08  | -   | TTT      | ncRNA_exonic | COL6A4P2     | NA                | NA                                                            | NA | NA          | NA |
| chr3 | 1.3E+08  | 1.3E+08  | T   | -        | intronic     | COL6A5       | NA                | NA                                                            | NA | rs11355796  | NA |
| chr3 | 1.34E+08 | 1.34E+08 | G   | C        | UTR3         | RAB6B        | NA                | NA                                                            | NA | NA          | NA |
| chr3 | 1.36E+08 | 1.36E+08 | A   | -        | UTR3         | MSL2         | NA                | NA                                                            | NA | NA          | NA |
| chr3 | 1.36E+08 | 1.36E+08 | A   | -        | UTR3         | MSL2         | NA                | NA                                                            | NA | NA          | NA |
| chr3 | 1.36E+08 | 1.36E+08 | G   | A        | UTR3         | MSL2         | NA                | NA                                                            | NA | rs78145147  | NA |
| chr3 | 1.39E+08 | 1.39E+08 | -   | TT       | UTR3         | PRR23C       | NA                | NA                                                            | NA | rs61429017  | NA |
| chr3 | 1.39E+08 | 1.39E+08 | TGC | -        | UTR5         | PRR23C       | NA                | NA                                                            | NA | rs63140560  | NA |
| chr3 | 1.41E+08 | 1.41E+08 | -   | A        | UTR3         | ZBTB38       | NA                | NA                                                            | NA | NA          | NA |
| chr3 | 1.42E+08 | 1.42E+08 | A   | -        | UTR3         | GK5          | NA                | NA                                                            | NA | rs71153943  | NA |
| chr3 | 1.42E+08 | 1.42E+08 | A   | G        | UTR3         | GK5          | NA                | NA                                                            | NA | rs112882257 | NA |
| chr3 | 1.42E+08 | 1.42E+08 | T   | -        | UTR3         | GK5          | NA                | NA                                                            | NA | rs139089663 | NA |
| chr3 | 1.42E+08 | 1.42E+08 | C   | T        | UTR3         | GK5          | NA                | NA                                                            | NA | rs115936014 | NA |
| chr3 | 1.42E+08 | 1.42E+08 | A   | -        | UTR3         | GK5          | NA                | NA                                                            | NA | rs137909394 | NA |
| chr3 | 1.44E+08 | 1.44E+08 | T   | -        | UTR3         | C3orf58      | NA                | NA                                                            | NA | NA          | NA |
| chr3 | 1.49E+08 | 1.49E+08 | A   | G        | UTR3         | TM4SF18      | NA                | NA                                                            | NA | rs76335061  | NA |
| chr3 | 1.5E+08  | 1.5E+08  | AAA | -        | UTR3         | TSC22D2      | NA                | NA                                                            | NA | rs71739355  | NA |
| chr3 | 1.51E+08 | 1.51E+08 | AC  | -        | UTR3         | CLRN1        | NA                | NA                                                            | NA | rs34027634  | NA |
| chr3 | 1.51E+08 | 1.51E+08 | A   | G        | ncRNA_exonic | LOC201651    | NA                | NA                                                            | NA | rs6809359   | NA |
| chr3 | 1.52E+08 | 1.52E+08 | C   | T        | ncRNA_UTR5   | AADAC        | NA                | NA                                                            | NA | rs2293004   | NA |
| chr3 | 1.53E+08 | 1.53E+08 | T   | -        | UTR3         | RAP2B        | NA                | NA                                                            | NA | rs112079528 | NA |
| chr3 | 1.53E+08 | 1.53E+08 | C   | T        | UTR3         | RAP2B        | NA                | NA                                                            | NA | rs138115718 | NA |
| chr3 | 1.53E+08 | 1.53E+08 | C   | T        | UTR3         | RAP2B        | NA                | NA                                                            | NA | rs144462183 | NA |
| chr3 | 1.54E+08 | 1.54E+08 | AC  | -        | UTR3         | ARHGEF26     | NA                | NA                                                            | NA | NA          | NA |
| chr3 | 1.54E+08 | 1.54E+08 | G   | A        | UTR3         | ARHGEF26     | NA                | NA                                                            | NA | NA          | NA |

|      |          |          |          |      |              |            |                     |                                                                |                                  |             |    |
|------|----------|----------|----------|------|--------------|------------|---------------------|----------------------------------------------------------------|----------------------------------|-------------|----|
| chr3 | 1.54E+08 | 1.54E+08 | TATA     | -    | UTR3         | DHX36      | NA                  | NA                                                             | NA                               | NA          | NA |
| chr3 | 1.56E+08 | 1.56E+08 | -        | G    | ncRNA_exonic | TIPARP-AS1 | NA                  | NA                                                             | NA                               | rs74614741  | NA |
| chr3 | 1.57E+08 | 1.57E+08 | T        | -    | ncRNA_exonic | PA2G4P4    | NA                  | NA                                                             | NA                               | NA          | NA |
| chr3 | 1.57E+08 | 1.57E+08 | C        | T    | UTR3         | C3orf55    | NA                  | NA                                                             | NA                               | rs4395360   | NA |
| chr3 | 1.59E+08 | 1.59E+08 | A        | G    | exonic       | MFSD1      | nonsynonymous SNV   | _001167903:exon7:c.A688G;p.I230V,MFSD1:NM_022736:exon8:c.A8C   | NA                               | rs3765083   | B  |
| chr3 | 1.65E+08 | 1.65E+08 | T        | C    | exonic       | SI         | nonsynonymous SNV   | SI:NM_001041:exon7:c.A691G;p.T231A                             | NA                               | rs9283633   | NA |
| chr3 | 1.65E+08 | 1.65E+08 | C        | T    | UTR3         | BCHE       | NA                  | NA                                                             | NA                               | rs3495      | NA |
| chr3 | 1.67E+08 | 1.67E+08 | T        | A    | exonic       | ZBBX       | nonsynonymous SNV   | :80T:p.K160N,ZBBX:NM_001199202:exon9:c.A393T;p.K131N,ZBBX:NM   | NA                               | rs4619784   | P  |
| chr3 | 1.67E+08 | 1.67E+08 | A        | G    | exonic       | WDR49      | nonsynonymous SNV   | WDR49:NM_178824:exon14:c.T1952C;p.L651P                        | NA                               | rs13060964  | B  |
| chr3 | 1.69E+08 | 1.69E+08 | G        | A    | ncRNA_exonic | EGFEM1P    | NA                  | NA                                                             | NA                               | rs139803907 | NA |
| chr3 | 1.7E+08  | 1.7E+08  | G        | T    | UTR3         | CLDN11     | NA                  | NA                                                             | NA                               | NA          | NA |
| chr3 | 1.71E+08 | 1.71E+08 | G        | T    | UTR3         | EIF5A2     | NA                  | NA                                                             | NA                               | rs192130148 | NA |
| chr3 | 1.71E+08 | 1.71E+08 | C        | T    | UTR3         | EIF5A2     | NA                  | NA                                                             | NA                               | NA          | NA |
| chr3 | 1.71E+08 | 1.71E+08 | C        | T    | UTR3         | EIF5A2     | NA                  | NA                                                             | NA                               | NA          | NA |
| chr3 | 1.71E+08 | 1.71E+08 | C        | T    | exonic       | TNIK       | nonsynonymous SNV   | 1161565:exon24:c.G2893A;p.E965K,TNIK:NM_001161560:exon25:c.G   | NA                               | NA          | NA |
| chr3 | 1.71E+08 | 1.71E+08 | C        | T    | exonic       | TNIK       | nonsynonymous SNV   | 01161565:exon23:c.G2743A;p.A915T,TNIK:NM_001161560:exon24:c.C  | NA                               | rs17857452  | NA |
| chr3 | 1.71E+08 | 1.71E+08 | A        | G    | exonic       | PLD1       | synonymous SNV      | 01130081:exon16:c.T1770C;p.R590R,PLD1:NM_002662:exon17:c.T18   | NA                               | rs2124147   | NA |
| chr3 | 1.77E+08 | 1.77E+08 | A        | -    | UTR3         | TBL1XR1    | NA                  | NA                                                             | NA                               | NA          | NA |
| chr3 | 1.8E+08  | 1.8E+08  | T        | G    | UTR3         | CCDC39     | NA                  | NA                                                             | NA                               | NA          | NA |
| chr3 | 1.81E+08 | 1.81E+08 | CACACACA | -    | ncRNA_exonic | SOX2-OT    | NA                  | NA                                                             | NA                               | NA          | NA |
| chr3 | 1.83E+08 | 1.83E+08 | T        | G    | UTR3         | KLHL6      | NA                  | NA                                                             | NA                               | NA          | NA |
| chr3 | 1.84E+08 | 1.84E+08 | A        | G    | exonic       | PARL       | synonymous SNV      | PARL:NM_018622:exon6:c.T648C;p.H216H                           | rs13091                          | NA          | NA |
| chr3 | 1.84E+08 | 1.84E+08 | G        | -    | exonic       | HTR3E      | frameshift deletion | i2delG;p.R21fs,HTR3E:NM_182589:exon1:c.62delG;p.R21fs,HTR3E:NM | NA                               | rs5855015   | NA |
| chr3 | 1.84E+08 | 1.84E+08 | G        | A    | exonic       | HTR3E      | nonsynonymous SNV   | i256A;p.A86T,HTR3E:NM_198314:exon1:c.G256A;p.A86T,HTR3E:NM_C   | NA                               | rs7627615   | B  |
| chr3 | 1.85E+08 | 1.85E+08 | T        | -    | UTR3         | IGF2BP2    | NA                  | NA                                                             | NA                               | NA          | NA |
| chr3 | 1.86E+08 | 1.86E+08 | G        | -    | UTR3         | ETV5       | NA                  | NA                                                             | NA                               | rs200001879 | NA |
| chr3 | 1.86E+08 | 1.86E+08 | A        | G    | UTR3         | DGKG       | NA                  | NA                                                             | NA                               | rs13089860  | NA |
| chr3 | 1.86E+08 | 1.86E+08 | T        | G    | UTR3         | TBCCD1     | NA                  | NA                                                             | NA                               | rs4686430   | NA |
| chr3 | 1.87E+08 | 1.87E+08 | C        | T    | UTR3         | RTP4       | NA                  | NA                                                             | NA                               | rs9028      | NA |
| chr3 | 1.88E+08 | 1.88E+08 | AGAG     | -    | ncRNA_exonic | FLJ42393   | NA                  | NA                                                             | NA                               | NA          | NA |
| chr3 | 1.88E+08 | 1.88E+08 | G        | A    | ncRNA_exonic | FLJ42393   | NA                  | NA                                                             | NA                               | rs344952    | NA |
| chr3 | 1.9E+08  | 1.9E+08  | TGTGTG   | -    | UTR3         | LEPREL1    | NA                  | NA                                                             | NA                               | rs150725503 | NA |
| chr3 | 1.9E+08  | 1.9E+08  | T        | C    | exonic       | LEPREL1    | synonymous SNV      | LEPREL1:NM_018192:exon2:c.A507G;p.E169E                        | NA                               | rs9821880   | NA |
| chr3 | 1.9E+08  | 1.9E+08  | C        | A    | UTR5         | CLDN1      | NA                  | NA                                                             | NA                               | rs12696600  | NA |
| chr3 | 1.91E+08 | 1.91E+08 | C        | T    | UTR3         | UTS2B      | NA                  | NA                                                             | NA                               | rs10937466  | NA |
| chr3 | 1.94E+08 | 1.94E+08 | -        | AAA  | UTR5         | HES1       | NA                  | NA                                                             | NA                               | NA          | NA |
| chr3 | 1.94E+08 | 1.94E+08 | G        | A    | UTR3         | CPN2       | NA                  | NA                                                             | NA                               | rs1048996   | NA |
| chr3 | 1.94E+08 | 1.94E+08 | -        | G    | UTR3         | ATP13A3    | NA                  | NA                                                             | NA                               | NA          | NA |
| chr3 | 1.94E+08 | 1.94E+08 | -        | A    | UTR3         | FAM43A     | NA                  | NA                                                             | NA                               | rs11457805  | NA |
| chr3 | 1.95E+08 | 1.95E+08 | G        | A    | UTR3         | XXYLT1     | NA                  | NA                                                             | NA                               | rs2720930   | NA |
| chr3 | 1.95E+08 | 1.95E+08 | A        | -    | UTR3         | ACAP2      | NA                  | NA                                                             | NA                               | rs200248324 | NA |
| chr3 | 1.95E+08 | 1.95E+08 | -        | GGCG | UTR3         | APOD       | NA                  | NA                                                             | NA                               | rs146445395 | NA |
| chr3 | 1.95E+08 | 1.95E+08 | T        | G    | UTR3         | APOD       | NA                  | NA                                                             | NA                               | NA          | NA |
| chr3 | 1.95E+08 | 1.95E+08 | T        | A    | ncRNA_exonic | SDHAP2     | NA                  | NA                                                             | ID=COSN404760;OCCURENCE=1(lung)  | rs6583274   | NA |
| chr3 | 1.95E+08 | 1.95E+08 | C        | T    | ncRNA_exonic | SDHAP2     | NA                  | NA                                                             | ID=COSN404761;OCCURENCE=1(lung)  | rs6583275   | NA |
| chr3 | 1.95E+08 | 1.95E+08 | T        | A    | UTR3         | MUC20      | NA                  | NA                                                             | NA                               | rs1808432   | NA |
| chr3 | 1.95E+08 | 1.95E+08 | G        | C    | UTR3         | MUC20      | NA                  | NA                                                             | NA                               | rs903195    | NA |
| chr3 | 1.95E+08 | 1.95E+08 | G        | -    | UTR3         | MUC4       | NA                  | NA                                                             | NA                               | NA          | NA |
| chr3 | 1.95E+08 | 1.95E+08 | G        | -    | UTR3         | MUC4       | NA                  | NA                                                             | NA                               | rs145605189 | NA |
| chr3 | 1.96E+08 | 1.96E+08 | C        | T    | exonic       | MUC4       | nonsynonymous SNV   | JA:p.G37D,MUC4:NM_004532:exon3:c.G263A;p.G88D,MUC4:NM_018      | NA                               | rs2259292   | NA |
| chr3 | 1.96E+08 | 1.96E+08 | A        | G    | exonic       | MUC4       | synonymous SNV      | MUC4:NM_018406:exon2:c.T12255C;p.D4085D                        | NA                               | rs143382980 | NA |
| chr3 | 1.96E+08 | 1.96E+08 | T        | G    | exonic       | MUC4       | nonsynonymous SNV   | MUC4:NM_018406:exon2:c.A12016C;p.T4006P                        | NA                               | rs199490754 | NA |
| chr3 | 1.96E+08 | 1.96E+08 | C        | T    | exonic       | MUC4       | nonsynonymous SNV   | MUC4:NM_018406:exon2:c.G11296A;p.A3766T                        | NA                               | rs202193697 | NA |
| chr3 | 1.96E+08 | 1.96E+08 | G        | A    | exonic       | MUC4       | nonsynonymous SNV   | MUC4:NM_018406:exon2:c.C11258T;p.A3753V                        | NA                               | rs201474621 | NA |
| chr3 | 1.96E+08 | 1.96E+08 | C        | A    | exonic       | MUC4       | nonsynonymous SNV   | MUC4:NM_018406:exon2:c.G11209T;p.A3737S                        | NA                               | rs112808291 | NA |
| chr3 | 1.96E+08 | 1.96E+08 | G        | T    | exonic       | MUC4       | nonsynonymous SNV   | MUC4:NM_018406:exon2:c.C11200A;p.P3734T                        | NA                               | rs201456607 | NA |
| chr3 | 1.96E+08 | 1.96E+08 | C        | T    | exonic       | MUC4       | nonsynonymous SNV   | MUC4:NM_018406:exon2:c.G11053A;p.D3685N                        | NA                               | NA          | NA |
| chr3 | 1.96E+08 | 1.96E+08 | T        | C    | exonic       | MUC4       | nonsynonymous SNV   | MUC4:NM_018406:exon2:c.A11032G;p.T3678A                        | NA                               | NA          | NA |
| chr3 | 1.96E+08 | 1.96E+08 | C        | G    | exonic       | MUC4       | nonsynonymous SNV   | MUC4:NM_018406:exon2:c.G10768C;p.A3590P                        | NA                               | NA          | NA |
| chr3 | 1.96E+08 | 1.96E+08 | G        | T    | exonic       | MUC4       | synonymous SNV      | MUC4:NM_018406:exon2:c.C10734A;p.S3578S                        | rs136990;OCCURENCE=1(kidney)     | NA          | NA |
| chr3 | 1.96E+08 | 1.96E+08 | G        | C    | exonic       | MUC4       | synonymous SNV      | MUC4:NM_018406:exon2:c.C10653G;p.T3551T                        | NA                               | NA          | NA |
| chr3 | 1.96E+08 | 1.96E+08 | C        | G    | exonic       | MUC4       | nonsynonymous SNV   | MUC4:NM_018406:exon2:c.G10213C;p.D3405H                        | NA                               | rs199592227 | NA |
| chr3 | 1.96E+08 | 1.96E+08 | C        | G    | exonic       | MUC4       | nonsynonymous SNV   | MUC4:NM_018406:exon2:c.G9903C;p.E3301D                         | NA                               | NA          | NA |
| chr3 | 1.96E+08 | 1.96E+08 | A        | G    | exonic       | MUC4       | nonsynonymous SNV   | MUC4:NM_018406:exon2:c.T9290C;p.V3097A                         | NA                               | rs79582237  | NA |
| chr3 | 1.96E+08 | 1.96E+08 | C        | T    | exonic       | MUC4       | nonsynonymous SNV   | MUC4:NM_018406:exon2:c.G8656A;p.A2886T                         | NA                               | rs201497773 | NA |
| chr3 | 1.96E+08 | 1.96E+08 | A        | G    | exonic       | MUC4       | nonsynonymous SNV   | MUC4:NM_018406:exon2:c.T8572C;p.S2858P                         | OSM1042886;OCCURENCE=2(endometri | NA          | NA |

|      |          |          |   |           |              |                             |                   |                                                                |                                   |             |    |
|------|----------|----------|---|-----------|--------------|-----------------------------|-------------------|----------------------------------------------------------------|-----------------------------------|-------------|----|
| chr3 | 1.96E+08 | 1.96E+08 | T | C         | exonic       | MUC4                        | nonsynonymous SNV | MUC4:NM_018406:exon2:c.A8200G:p.T2734A                         | NA                                | NA          | NA |
| chr3 | 1.96E+08 | 1.96E+08 | G | C         | exonic       | MUC4                        | nonsynonymous SNV | MUC4:NM_018406:exon2:c.C8199G:p.D2733E                         | NA                                | NA          | NA |
| chr3 | 1.96E+08 | 1.96E+08 | T | C         | exonic       | MUC4                        | nonsynonymous SNV | MUC4:NM_018406:exon2:c.A8029G:p.S2677G                         | NA                                | NA          | NA |
| chr3 | 1.96E+08 | 1.96E+08 | C | G         | exonic       | MUC4                        | nonsynonymous SNV | MUC4:NM_018406:exon2:c.G7168C:p.A2390P                         | NA                                | NA          | NA |
| chr3 | 1.96E+08 | 1.96E+08 | C | T         | exonic       | MUC4                        | nonsynonymous SNV | MUC4:NM_018406:exon2:c.G7048A:p.A2350T                         | NA                                | rs78846267  | NA |
| chr3 | 1.96E+08 | 1.96E+08 | C | T         | exonic       | MUC4                        | nonsynonymous SNV | MUC4:NM_018406:exon2:c.G6952A:p.A2318T                         | NA                                | rs71321831  | NA |
| chr3 | 1.96E+08 | 1.96E+08 | T | A         | exonic       | MUC4                        | nonsynonymous SNV | MUC4:NM_018406:exon2:c.A6895T:p.T2299S                         | 1149600,COSM149599;OCCURENCE=1(   | rs79961534  | NA |
| chr3 | 1.96E+08 | 1.96E+08 | A | G         | exonic       | MUC4                        | nonsynonymous SNV | MUC4:NM_018406:exon2:c.T6814C:p.S2272P                         | ID=COSM396033;OCCURENCE=1(lung)   | rs71187734  | NA |
| chr3 | 1.96E+08 | 1.96E+08 | G | A         | exonic       | MUC4                        | synonymous SNV    | MUC4:NM_018406:exon2:c.C6783T:p.D2261D                         | NA                                | rs3107748   | NA |
| chr3 | 1.96E+08 | 1.96E+08 | G | A         | exonic       | MUC4                        | nonsynonymous SNV | MUC4:NM_018406:exon2:c.C6164T:p.S2055F                         | NA                                | rs113602668 | NA |
| chr3 | 1.96E+08 | 1.96E+08 | G | A         | exonic       | MUC4                        | synonymous SNV    | MUC4:NM_018406:exon2:c.C6108T:p.T2036T                         | 1149604,COSM149603;OCCURENCE=1(   | rs113457754 | NA |
| chr3 | 1.96E+08 | 1.96E+08 | A | G         | exonic       | MUC4                        | synonymous SNV    | MUC4:NM_018406:exon2:c.T5700C:p.G1900G                         | NA                                | NA          | NA |
| chr3 | 1.96E+08 | 1.96E+08 | G | C         | exonic       | MUC4                        | nonsynonymous SNV | MUC4:NM_018406:exon2:c.C5315G:p.A1772G                         | NA                                | rs140116971 | NA |
| chr3 | 1.96E+08 | 1.96E+08 | A | G         | exonic       | MUC4                        | synonymous SNV    | MUC4:NM_018406:exon2:c.T5196C:p.T1732T                         | NA                                | NA          | NA |
| chr3 | 1.96E+08 | 1.96E+08 | A | G         | exonic       | MUC4                        | nonsynonymous SNV | MUC4:NM_018406:exon2:c.T5162C:p.V1721A                         | NA                                | rs202065211 | NA |
| chr3 | 1.96E+08 | 1.96E+08 | A | G         | exonic       | MUC4                        | nonsynonymous SNV | MUC4:NM_018406:exon2:c.T4442C:p.V1481A                         | NA                                | NA          | NA |
| chr3 | 1.96E+08 | 1.96E+08 | A | G         | exonic       | MUC4                        | synonymous SNV    | MUC4:NM_018406:exon2:c.T3996C:p.T1332T                         | NA                                | rs79619815  | NA |
| chr3 | 1.96E+08 | 1.96E+08 | C | G         | exonic       | MUC4                        | nonsynonymous SNV | MUC4:NM_018406:exon2:c.G3981C:p.M1327I                         | NA                                | rs200851738 | NA |
| chr3 | 1.96E+08 | 1.96E+08 | T | A         | exonic       | MUC4                        | synonymous SNV    | MUC4:NM_018406:exon2:c.A3723T:p.A1241A                         | NA                                | NA          | NA |
| chr3 | 1.96E+08 | 1.96E+08 | T | A         | exonic       | MUC4                        | synonymous SNV    | MUC4:NM_018406:exon2:c.A3636T:p.G1212G                         | NA                                | rs201186280 | NA |
| chr3 | 1.96E+08 | 1.96E+08 | C | G         | exonic       | MUC4                        | nonsynonymous SNV | MUC4:NM_018406:exon2:c.G3443C:p.G1148A                         | NA                                | rs201451131 | NA |
| chr3 | 1.98E+08 | 1.98E+08 | T | C         | exonic       | LRCH3                       | synonymous SNV    | LRCH3:NM_032773:exon10:c.T1314C:p.Y438Y                        | NA                                | rs17850206  | NA |
| chr3 | 1.98E+08 | 1.98E+08 | T | C         | UTR3         | LMLN                        | NA                | NA                                                             | NA                                | NA          | NA |
| chr4 | 664028   | 664028   | - | T         | UTR3         | PDE6B                       | NA                | NA                                                             | NA                                | NA          | NA |
| chr4 | 844781   | 844781   | G | A         | exonic       | GAK                         | synonymous SNV    | GAK:NM_005255:exon26:c.C3600T:p.T1200T                         | OSM287830;OCCURENCE=1(large_intes | rs75072999  | NA |
| chr4 | 860192   | 860192   | A | G         | exonic       | GAK                         | synonymous SNV    | GAK:NM_005255:exon22:c.T3003C:p.S1001S                         | NA                                | rs1064207   | NA |
| chr4 | 944210   | 944210   | A | C         | exonic       | TMEM175                     | nonsynonymous SNV | TMEM175:NM_032326:exon4:c.A194C:p.Q65P                         | NA                                | rs34884217  | B  |
| chr4 | 1191486  | 1191486  | - | T         | ncRNA_exonic | LOC100130872                | NA                | NA                                                             | NA                                | NA          | NA |
| chr4 | 1192409  | 1192409  | G | A         | ncRNA_exonic | LOC100130872                | NA                | NA                                                             | NA                                | rs875475    | NA |
| chr4 | 1388379  | 1388379  | G | A         | exonic       | CRIPAK                      | nonsynonymous SNV | CRIPAK:NM_175918:exon1:c.G80A:p.C27Y                           | NA                                | rs56109734  | D  |
| chr4 | 1388429  | 1388429  | G | A         | exonic       | CRIPAK                      | nonsynonymous SNV | CRIPAK:NM_175918:exon1:c.G130A:p.A44T                          | NA                                | rs79298048  | B  |
| chr4 | 1388631  | 1388631  | C | G         | exonic       | CRIPAK                      | nonsynonymous SNV | CRIPAK:NM_175918:exon1:c.C332G:p.P111R                         | ID=COSM227471;OCCURENCE=1(skin)   | rs200849975 | NA |
| chr4 | 1388867  | 1388867  | A | C         | exonic       | CRIPAK                      | nonsynonymous SNV | CRIPAK:NM_175918:exon1:c.A568C:p.I190L                         | NA                                | rs76058011  | NA |
| chr4 | 1389154  | 1389154  | G | C         | exonic       | CRIPAK                      | synonymous SNV    | CRIPAK:NM_175918:exon1:c.G855C:p.P285P                         | NA                                | NA          | NA |
| chr4 | 1389380  | 1389380  | T | G         | exonic       | CRIPAK                      | nonsynonymous SNV | CRIPAK:NM_175918:exon1:c.T1081G:p.C361G                        | NA                                | NA          | D  |
| chr4 | 1813925  | 1813925  | - | A         | UTR3         | LETM1                       | NA                | NA                                                             | NA                                | NA          | NA |
| chr4 | 1814119  | 1814119  | T | G         | UTR3         | LETM1                       | NA                | NA                                                             | NA                                | NA          | NA |
| chr4 | 2233250  | 2233250  | C | T         | UTR3         | HAUS3                       | NA                | NA                                                             | NA                                | rs183516458 | NA |
| chr4 | 2252201  | 2252201  | C | T         | UTR3         | MXD4                        | NA                | NA                                                             | NA                                | rs1052682   | NA |
| chr4 | 3240568  | 3240568  | C | A         | exonic       | HTT                         | synonymous SNV    | HTT:NM_002111:exon66:c.C9078A:p.T3026T                         | NA                                | NA          | NA |
| chr4 | 3475252  | 3475252  | T | C         | exonic       | DOK7                        | synonymous SNV    | M_001164673:exon3:c.T220C:p.L74L,DOK7:NM_173660:exon3:c.T220   | NA                                | rs4325970   | NA |
| chr4 | 4190576  | 4190576  | C | G         | exonic       | OTOP1                       | nonsynonymous SNV | OTOP1:NM_177998:exon6:c.G1793C:p.R598P                         | NA                                | rs199742451 | D  |
| chr4 | 4190577  | 4190577  | G | C         | exonic       | OTOP1                       | nonsynonymous SNV | OTOP1:NM_177998:exon6:c.C1792G:p.R598G                         | NA                                | rs200368405 | D  |
| chr4 | 4190595  | 4190595  | G | C         | exonic       | OTOP1                       | nonsynonymous SNV | OTOP1:NM_177998:exon6:c.C1774G:p.P592A                         | NA                                | rs2310687   | D  |
| chr4 | 5814052  | 5814052  | T | C         | UTR3         | EVC                         | NA                | NA                                                             | NA                                | NA          | NA |
| chr4 | 7044357  | 7044357  | A | G         | exonic       | CCDC96                      | synonymous SNV    | CCDC96:NM_153376:exon1:c.T309C:p.V103V                         | NA                                | rs871133    | NA |
| chr4 | 8583312  | 8583312  | A | C         | exonic       | GPR78                       | nonsynonymous SNV | GPR78:NM_080819:exon1:c.A603C:p.R201S                          | NA                                | rs17844778  | B  |
| chr4 | 8869257  | 8869257  | A | G         | UTR3         | HMX1                        | NA                | NA                                                             | NA                                | rs13303067  | NA |
| chr4 | 10515142 | 10515142 | C | T         | exonic       | CLNK                        | synonymous SNV    | CLNK:NM_052964:exon16:c.G852A:p.L284L                          | NA                                | rs114623663 | NA |
| chr4 | 11400431 | 11400431 | T | -         | UTR3         | HS3ST1                      | NA                | NA                                                             | NA                                | NA          | NA |
| chr4 | 13335614 | 13335614 | A | G         | intergenic   | 1(dist=1905077),RAB28(dist= | NA                | NA                                                             | NA                                | rs150340205 | NA |
| chr4 | 17634213 | 17634213 | A | G         | exonic       | FAM184B                     | nonsynonymous SNV | FAM184B:NM_015688:exon18:c.T3125C:p.V1042A                     | NA                                | rs6825562   | NA |
| chr4 | 20731089 | 20731089 | - | AC        | UTR3         | KCNIP4                      | NA                | NA                                                             | NA                                | NA          | NA |
| chr4 | 20731092 | 20731092 | - | TTTAAATG1 | UTR3         | KCNIP4                      | NA                | NA                                                             | NA                                | NA          | NA |
| chr4 | 20731213 | 20731213 | - | TTTTAATCT | UTR3         | KCNIP4                      | NA                | NA                                                             | NA                                | NA          | NA |
| chr4 | 20731232 | 20731242 | - | AAATGGAA  | UTR3         | KCNIP4                      | NA                | NA                                                             | NA                                | rs151224175 | NA |
| chr4 | 20852244 | 20852244 | A | G         | exonic       | KCNIP4                      | synonymous SNV    | 1:NM_001035004:exon2:c.T24C:p.P8P,KCNIP4:NM_025221:exon2:c.T1  | NA                                | rs3765122   | NA |
| chr4 | 21850576 | 21850576 | - | GTGTGTGC  | ncRNA_exonic | KCNIP4-IT1                  | NA                | NA                                                             | NA                                | rs145269724 | NA |
| chr4 | 26585881 | 26585881 | C | T         | exonic       | TBC1D19                     | synonymous SNV    | TBC1D19:NM_018317:exon1:c.C66T:p.S22S                          | NA                                | rs4692549   | NA |
| chr4 | 31147973 | 31147980 | - | AAATAAAT  | UTR3         | PCDH7                       | NA                | NA                                                             | NA                                | rs145102344 | NA |
| chr4 | 37593975 | 37593975 | - | A         | UTR3         | C4orf19                     | NA                | NA                                                             | NA                                | NA          | NA |
| chr4 | 37613930 | 37613930 | G | A         | UTR3         | RELL1                       | NA                | NA                                                             | NA                                | rs17495047  | NA |
| chr4 | 39450940 | 39450940 | - | A         | UTR3         | KLB                         | NA                | NA                                                             | NA                                | rs35648143  | NA |
| chr4 | 39451560 | 39451565 | - | AATAAA    | UTR3         | KLB                         | NA                | NA                                                             | NA                                | rs145759953 | NA |
| chr4 | 39458051 | 39458051 | A | G         | exonic       | RPL9                        | synonymous SNV    | l_001024921:exon4:c.T366C:p.Y122Y,RPL9:NM_000661:exon5:c.T366C | NA                                | rs1065744   | NA |
| chr4 | 39478832 | 39478832 | G | A         | UTR3         | LIAS                        | NA                | NA                                                             | NA                                | rs1048140   | NA |



|      |          |          |           |           |              |            |                        |                                                                                      |    |             |    |
|------|----------|----------|-----------|-----------|--------------|------------|------------------------|--------------------------------------------------------------------------------------|----|-------------|----|
| chr4 | 39501723 | 39501723 | A         | -         | UTR3         | UGDH       | NA                     | NA                                                                                   | NA | NA          | NA |
| chr4 | 39529146 | 39529146 | T         | C         | UTR5         | UGDH       | NA                     | NA                                                                                   | NA | rs12642711  | NA |
| chr4 | 40044556 | 40044556 | G         | T         | ncRNA_exonic | LOC344967  | NA                     | NA                                                                                   | NA | NA          | NA |
| chr4 | 40438576 | 40438576 | A         | G         | exonic       | RBM47      | synonymous SNV         | RBM47:NM_001098634:exon5:c.T1212C:p.G404G                                            | NA | rs2307046   | NA |
| chr4 | 40812639 | 40812639 | C         | A         | UTR3         | APBB2      | NA                     | NA                                                                                   | NA | NA          | NA |
| chr4 | 41746101 | 41746101 | G         | A         | UTR3         | PHOX2B     | NA                     | NA                                                                                   | NA | NA          | NA |
| chr4 | 41746127 | 41746127 | C         | A         | UTR3         | PHOX2B     | NA                     | NA                                                                                   | NA | NA          | NA |
| chr4 | 43032612 | 43032612 | G         | A         | UTR3         | GRXCR1     | NA                     | NA                                                                                   | NA | rs4861050   | NA |
| chr4 | 44701750 | 44701750 | A         | C         | UTR3         | GUF1       | NA                     | NA                                                                                   | NA | rs6812211   | NA |
| chr4 | 44701764 | 44701764 | T         | G         | UTR3         | GUF1       | NA                     | NA                                                                                   | NA | rs6817397   | NA |
| chr4 | 47428446 | 47428447 | AA        | -         | UTR3         | GABRB1     | NA                     | NA                                                                                   | NA | NA          | NA |
| chr4 | 48038716 | 48038716 | G         | A         | UTR3         | NIPAL1     | NA                     | NA                                                                                   | NA | rs11722463  | NA |
| chr4 | 48500089 | 48500089 | T         | -         | UTR3         | FRYL       | NA                     | NA                                                                                   | NA | rs59265109  | NA |
| chr4 | 52780989 | 52780989 | -         | T         | UTR3         | DCUN1D4    | NA                     | NA                                                                                   | NA | NA          | NA |
| chr4 | 53739938 | 53739938 | T         | -         | UTR3         | SCFD2      | NA                     | NA                                                                                   | NA | NA          | NA |
| chr4 | 54876132 | 54876132 | C         | -         | UTR3         | CHIC2      | NA                     | NA                                                                                   | NA | rs68107873  | NA |
| chr4 | 56899013 | 56899013 | -         | iTGTGTGTG | UTR3         | CEP135     | NA                     | NA                                                                                   | NA | NA          | NA |
| chr4 | 56899377 | 56899377 | A         | G         | UTR3         | CEP135     | NA                     | NA                                                                                   | NA | rs12512313  | NA |
| chr4 | 57220242 | 57220242 | C         | A         | exonic       | AASDH      | nonsynonymous SNV      | AASDH:NM_181806:exon8:c.G1346T:p.R449L                                               | NA | NA          | D  |
| chr4 | 57326996 | 57326996 | C         | T         | UTR3         | PAICS      | NA                     | NA                                                                                   | NA | rs1140982   | NA |
| chr4 | 57371391 | 57371391 | A         | T         | UTR5         | ARL9       | NA                     | NA                                                                                   | NA | rs17086919  | NA |
| chr4 | 68483772 | 68483772 | C         | A         | UTR3         | UBA6       | NA                     | NA                                                                                   | NA | rs75660867  | NA |
| chr4 | 69512381 | 69512381 | C         | T         | UTR3         | UGT2B15    | NA                     | NA                                                                                   | NA | NA          | NA |
| chr4 | 71029602 | 71029602 | T         | -         | UTR3         | C4orf40    | NA                     | NA                                                                                   | NA | rs71210152  | NA |
| chr4 | 71117016 | 71117016 | T         | G         | UTR3         | CSN3       | NA                     | NA                                                                                   | NA | rs62308392  | NA |
| chr4 | 72435944 | 72435973 | TTCAGCCTC | -         | UTR3         | SLC4A4     | NA                     | NA                                                                                   | NA | NA          | NA |
| chr4 | 75975077 | 75975077 | T         | -         | UTR3         | PARM1      | NA                     | NA                                                                                   | NA | NA          | NA |
| chr4 | 76720885 | 76720885 | T         | C         | exonic       | USO1       | unknown                | UNKNOWN                                                                              | NA | rs13119659  | NA |
| chr4 | 76871264 | 76871264 | C         | A         | UTR3         | SDAD1      | NA                     | NA                                                                                   | NA | NA          | NA |
| chr4 | 76871270 | 76871270 | C         | A         | UTR3         | SDAD1      | NA                     | NA                                                                                   | NA | NA          | NA |
| chr4 | 77662125 | 77662125 | C         | T         | exonic       | SHROOM3    | synonymous SNV         | SHROOM3:NM_020859:exon5:c.C2799T:p.S933S                                             | NA | rs36036308  | NA |
| chr4 | 77701688 | 77701688 | A         | -         | UTR3         | SHROOM3    | NA                     | NA                                                                                   | NA | rs11325137  | NA |
| chr4 | 78635594 | 78635615 | AAAAAAAA  | -         | UTR3         | CNOT6L     | NA                     | NA                                                                                   | NA | NA          | NA |
| chr4 | 84011704 | 84011704 | G         | A         | UTR3         | PLAC8      | NA                     | NA                                                                                   | NA | NA          | NA |
| chr4 | 84383373 | 84383373 | C         | -         | UTR3         | FAM175A    | NA                     | NA                                                                                   | NA | rs34610900  | NA |
| chr4 | 85927783 | 85927783 | A         | -         | ncRNA_exonic | WDFY3-AS2  | NA                     | NA                                                                                   | NA | rs10715207  | NA |
| chr4 | 86396465 | 86396465 | T         | G         | UTR5         | ARHGAP24   | NA                     | NA                                                                                   | NA | NA          | NA |
| chr4 | 88536869 | 88536886 | CAGCAGCA  | -         | exonic       | DSPP       | nonframeshift deletion | DSPP:NM_014208:exon5:c.3055_3072del:p.1019_1024del                                   | NA | NA          | NA |
| chr4 | 88536980 | 88536980 | A         | G         | exonic       | DSPP       | nonsynonymous SNV      | DSPP:NM_014208:exon5:c.A3166G:p.N1056D                                               | NA | rs201074114 | NA |
| chr4 | 88537024 | 88537024 | T         | C         | exonic       | DSPP       | synonymous SNV         | DSPP:NM_014208:exon5:c.T3210C:p.S1070S                                               | NA | NA          | NA |
| chr4 | 88537123 | 88537123 | C         | T         | exonic       | DSPP       | synonymous SNV         | DSPP:NM_014208:exon5:c.C3309T:p.S1103S                                               | NA | NA          | NA |
| chr4 | 88537180 | 88537180 | T         | C         | exonic       | DSPP       | synonymous SNV         | DSPP:NM_014208:exon5:c.T3366C:p.N1122N                                               | NA | NA          | NA |
| chr4 | 88537216 | 88537216 | T         | C         | exonic       | DSPP       | synonymous SNV         | DSPP:NM_014208:exon5:c.T3402C:p.D1134D                                               | NA | NA          | NA |
| chr4 | 89650211 | 89650212 | TT        | -         | ncRNA_exonic | FAM13A-AS1 | NA                     | NA                                                                                   | NA | NA          | NA |
| chr4 | 90645853 | 90645853 | C         | T         | UTR3         | SNCA       | NA                     | NA                                                                                   | NA | NA          | NA |
| chr4 | 90646469 | 90646469 | -         | AAAAA     | UTR3         | SNCA       | NA                     | NA                                                                                   | NA | NA          | NA |
| chr4 | 90875762 | 90875762 | A         | T         | UTR3         | MMRN1      | NA                     | NA                                                                                   | NA | rs114018162 | NA |
| chr4 | 91759710 | 91759710 | -         | A         | intronic     | CCSER1     | NA                     | NA                                                                                   | NA | NA          | NA |
| chr4 | 96076621 | 96076621 | G         | A         | UTR3         | BMPR1B     | NA                     | NA                                                                                   | NA | NA          | NA |
| chr4 | 99850448 | 99850448 | A         | C         | UTR5         | EIF4E      | NA                     | NA                                                                                   | NA | NA          | NA |
| chr4 | 99850451 | 99850451 | T         | -         | UTR5         | EIF4E      | NA                     | NA                                                                                   | NA | NA          | NA |
| chr4 | 1E+08    | 1E+08    | A         | T         | exonic       | ADH6       | nonsynonymous SNV      | ADH6:NM_000672:exon1:c.T4A:p.C2S,ADH6:NM_001102470:exon1:c.T4A:p.C2S                 | NA | rs4699735   | B  |
| chr4 | 1E+08    | 1E+08    | A         | G         | exonic       | ADH1B      | synonymous SNV         | ADH1B:NM_000668:exon6:c.T753C:p.I251I                                                | NA | rs1789882   | NA |
| chr4 | 1E+08    | 1E+08    | C         | T         | exonic       | ADH1C      | unknown                | UNKNOWN                                                                              | NA | rs1693425   | NA |
| chr4 | 1E+08    | 1E+08    | -         | T         | UTR3         | TRMT10A    | NA                     | NA                                                                                   | NA | rs149160816 | NA |
| chr4 | 1.01E+08 | 1.01E+08 | AA        | -         | UTR3         | MTTP       | NA                     | NA                                                                                   | NA | NA          | NA |
| chr4 | 1.01E+08 | 1.01E+08 | C         | T         | UTR3         | EMCN       | NA                     | NA                                                                                   | NA | NA          | NA |
| chr4 | 1.02E+08 | 1.02E+08 | -         | TT        | UTR3         | PPP3CA     | NA                     | NA                                                                                   | NA | NA          | NA |
| chr4 | 1.03E+08 | 1.03E+08 | G         | A         | UTR3         | SLC39A8    | NA                     | NA                                                                                   | NA | rs190178    | NA |
| chr4 | 1.03E+08 | 1.03E+08 | C         | T         | UTR3         | SLC39A8    | NA                     | NA                                                                                   | NA | rs58321370  | NA |
| chr4 | 1.04E+08 | 1.04E+08 | C         | A         | UTR3         | NFKB1      | NA                     | NA                                                                                   | NA | NA          | NA |
| chr4 | 1.04E+08 | 1.04E+08 | T         | C         | UTR3         | CISD2      | NA                     | NA                                                                                   | NA | rs7439174   | NA |
| chr4 | 1.04E+08 | 1.04E+08 | TG        | -         | UTR3         | CISD2      | NA                     | NA                                                                                   | NA | rs199492696 | NA |
| chr4 | 1.09E+08 | 1.09E+08 | G         | A         | ncRNA_exonic | RPL34-AS1  | NA                     | NA                                                                                   | NA | rs74676576  | NA |
| chr4 | 1.1E+08  | 1.1E+08  | T         | G         | exonic       | COL25A1    | synonymous SNV         | COL25A1:NM_032518:exon34:c.A1839C:p.G613G, COL25A1:NM_032518:exon34:c.A1839C:p.G613G | NA | rs7689008   | NA |
| chr4 | 1.14E+08 | 1.14E+08 | C         | T         | UTR3         | CAMK2D     | NA                     | NA                                                                                   | NA | rs12511604  | NA |



|      |          |          |          |     |              |           |                   |                                                                                             |                                  |             |    |
|------|----------|----------|----------|-----|--------------|-----------|-------------------|---------------------------------------------------------------------------------------------|----------------------------------|-------------|----|
| chr4 | 1.14E+08 | 1.14E+08 | -        | A   | UTR3         | CAMK2D    | NA                | NA                                                                                          | NA                               | NA          | NA |
| chr4 | 1.2E+08  | 1.2E+08  | AAA      | -   | UTR5         | USP53     | NA                | NA                                                                                          | NA                               | NA          | NA |
| chr4 | 1.22E+08 | 1.22E+08 | T        | -   | UTR3         | TNIP3     | NA                | NA                                                                                          | NA                               | NA          | NA |
| chr4 | 1.22E+08 | 1.22E+08 | T        | G   | UTR3         | TNIP3     | NA                | NA                                                                                          | NA                               | NA          | NA |
| chr4 | 1.22E+08 | 1.22E+08 | ACACACAC | -   | UTR3         | TNIP3     | NA                | NA                                                                                          | NA                               | rs10561132  | NA |
| chr4 | 1.23E+08 | 1.23E+08 | T        | C   | UTR3         | TMEM155   | NA                | NA                                                                                          | NA                               | rs4342205   | NA |
| chr4 | 1.23E+08 | 1.23E+08 | G        | C   | ncRNA_exonic | PP12613   | NA                | NA                                                                                          | NA                               | rs4833772   | NA |
| chr4 | 1.23E+08 | 1.23E+08 | G        | C   | UTR5         | BBS7      | NA                | NA                                                                                          | NA                               | rs2271176   | NA |
| chr4 | 1.24E+08 | 1.24E+08 | T        | -   | UTR3         | SPATA5    | NA                | NA                                                                                          | NA                               | rs11306876  | NA |
| chr4 | 1.24E+08 | 1.24E+08 | G        | A   | UTR3         | SPATA5    | NA                | NA                                                                                          | NA                               | rs2132078   | NA |
| chr4 | 1.29E+08 | 1.29E+08 | G        | T   | UTR5         | HSPA4L    | NA                | NA                                                                                          | NA                               | NA          | NA |
| chr4 | 1.4E+08  | 1.4E+08  | TA       | -   | UTR3         | ELF2      | NA                | NA                                                                                          | NA                               | rs113800639 | NA |
| chr4 | 1.41E+08 | 1.41E+08 | C        | T   | exonic       | MAML3     | synonymous SNV    | MAML3:NM_018717:exon2:c.G1479A:p.Q493Q                                                      | NA                               | rs62344937  | NA |
| chr4 | 1.43E+08 | 1.43E+08 | G        | A   | exonic       | INPP4B    | synonymous SNV    | _001101669:exon7:c.C369T:p.D123D,INPP4B:NM_003866:exon8:c.C30=COSM149743;OCCURENCE=1(stomac | rs1982966                        | NA          | NA |
| chr4 | 1.46E+08 | 1.46E+08 | C        | A   | UTR3         | SMAD1     | NA                | NA                                                                                          | NA                               | rs62343509  | NA |
| chr4 | 1.47E+08 | 1.47E+08 | A        | -   | UTR3         | MMAA      | NA                | NA                                                                                          | NA                               | rs33978754  | NA |
| chr4 | 1.51E+08 | 1.51E+08 | C        | T   | exonic       | DCLK2     | nonsynonymous SNV | 1040260:exon16:c.C2242T:p.P748S,DCLK2:NM_001040261:exon17:c.C                               | NA                               | rs13152819  | NA |
| chr4 | 1.51E+08 | 1.51E+08 | C        | G   | exonic       | DCLK2     | nonsynonymous SNV | .040260:exon16:c.C2243G:p.P748R,DCLK2:NM_001040261:exon17:c.C                               | NA                               | rs60939896  | NA |
| chr4 | 1.51E+08 | 1.51E+08 | C        | G   | UTR3         | DCLK2     | NA                | NA                                                                                          | NA                               | rs13101461  | NA |
| chr4 | 1.52E+08 | 1.52E+08 | C        | -   | UTR3         | MAB21L2   | NA                | NA                                                                                          | NA                               | rs67191302  | NA |
| chr4 | 1.52E+08 | 1.52E+08 | TCT      | -   | UTR5         | FAM160A1  | NA                | NA                                                                                          | NA                               | rs201341310 | NA |
| chr4 | 1.54E+08 | 1.54E+08 | T        | C   | exonic       | FHDC1     | nonsynonymous SNV | FHDC1:NM_033393:exon11:c.T1579C:p.S527P                                                     | NA                               | NA          | B  |
| chr4 | 1.54E+08 | 1.54E+08 | A        | C   | exonic       | FHDC1     | nonsynonymous SNV | FHDC1:NM_033393:exon11:c.A1606C:p.T536P                                                     | NA                               | NA          | P  |
| chr4 | 1.54E+08 | 1.54E+08 | T        | G   | exonic       | TRIM2     | synonymous SNV    | _001130067:exon3:c.T324G:p.T108T,TRIM2:NM_015271:exon3:c.T40!                               | NA                               | rs2289409   | NA |
| chr4 | 1.54E+08 | 1.54E+08 | -        | T   | UTR3         | TRIM2     | NA                | NA                                                                                          | NA                               | rs71598263  | NA |
| chr4 | 1.56E+08 | 1.56E+08 | A        | G   | UTR3         | LRAT      | NA                | NA                                                                                          | NA                               | rs77071498  | NA |
| chr4 | 1.56E+08 | 1.56E+08 | T        | -   | UTR3         | RBM46     | NA                | NA                                                                                          | NA                               | rs34773010  | NA |
| chr4 | 1.56E+08 | 1.56E+08 | A        | G   | UTR5         | MAP9      | NA                | NA                                                                                          | ID=COSN404819;OCCURENCE=1(lung)  | rs17377679  | NA |
| chr4 | 1.57E+08 | 1.57E+08 | -        | A   | UTR3         | GUCY1A3   | NA                | NA                                                                                          | NA                               | NA          | NA |
| chr4 | 1.58E+08 | 1.58E+08 | TG       | -   | UTR5         | GRIA2     | NA                | NA                                                                                          | NA                               | rs71934280  | NA |
| chr4 | 1.6E+08  | 1.6E+08  | C        | T   | UTR5         | PPID      | NA                | NA                                                                                          | NA                               | rs2070629   | NA |
| chr4 | 1.6E+08  | 1.6E+08  | A        | -   | UTR3         | FNIP2     | NA                | NA                                                                                          | NA                               | rs11340968  | NA |
| chr4 | 1.66E+08 | 1.66E+08 | T        | C   | UTR3         | TRIM61    | NA                | NA                                                                                          | NA                               | rs6834073   | NA |
| chr4 | 1.66E+08 | 1.66E+08 | T        | -   | UTR3         | TMEM192   | NA                | NA                                                                                          | NA                               | NA          | NA |
| chr4 | 1.67E+08 | 1.67E+08 | -        | AA  | UTR3         | TLL1      | NA                | NA                                                                                          | NA                               | NA          | NA |
| chr4 | 1.69E+08 | 1.69E+08 | T        | C   | exonic       | DDX60L    | nonsynonymous SNV | DDX60L:NM_001012967:exon37:c.A4936G:p.M1646V                                                | NA                               | rs2684348   | NA |
| chr4 | 1.7E+08  | 1.7E+08  | G        | T   | exonic       | CBR4      | nonsynonymous SNV | CBR4:NM_032783:exon2:c.C208A:p.L70M                                                         | NA                               | rs2877380   | B  |
| chr4 | 1.7E+08  | 1.7E+08  | A        | G   | exonic       | SH3RF1    | nonsynonymous SNV | SH3RF1:NM_020870:exon5:c.T943C:p.S315P                                                      | NA                               | NA          | P  |
| chr4 | 1.76E+08 | 1.76E+08 | G        | T   | UTR5         | ADAM29    | NA                | NA                                                                                          | NA                               | rs7689299   | NA |
| chr4 | 1.76E+08 | 1.76E+08 | C        | T   | UTR5         | ADAM29    | NA                | NA                                                                                          | NA                               | rs62334419  | NA |
| chr4 | 1.77E+08 | 1.77E+08 | A        | G   | exonic       | SPATA4    | synonymous SNV    | SPATA4:NM_144644:exon4:c.T510C:p.Y170Y                                                      | NA                               | rs2291244   | NA |
| chr4 | 1.77E+08 | 1.77E+08 | T        | C   | UTR5         | SPATA4    | NA                | NA                                                                                          | NA                               | rs4565028   | NA |
| chr4 | 1.77E+08 | 1.77E+08 | T        | -   | UTR3         | SPCS3     | NA                | NA                                                                                          | NA                               | rs67194984  | NA |
| chr4 | 1.84E+08 | 1.84E+08 | AAA      | -   | ncRNA_exonic | FAM92A1P2 | NA                | NA                                                                                          | NA                               | NA          | NA |
| chr4 | 1.84E+08 | 1.84E+08 | G        | T   | exonic       | WWC2      | nonsynonymous SNV | WWC2:NM_024949:exon16:c.G2446T:p.V816F                                                      | NA                               | rs11734376  | NA |
| chr4 | 1.86E+08 | 1.86E+08 | -        | ATT | UTR3         | CASP3     | NA                | NA                                                                                          | NA                               | rs4647696   | NA |
| chr4 | 1.86E+08 | 1.86E+08 | G        | A   | exonic       | CCDC111   | synonymous SNV    | CCDC111:NM_152683:exon8:c.G948A:p.Q316Q                                                     | NA                               | rs34985821  | NA |
| chr4 | 1.86E+08 | 1.86E+08 | T        | A   | UTR3         | LRP2BP    | NA                | NA                                                                                          | NA                               | rs28723682  | NA |
| chr4 | 1.87E+08 | 1.87E+08 | T        | C   | UTR3         | CYP4V2    | NA                | NA                                                                                          | NA                               | rs62348764  | NA |
| chr4 | 1.91E+08 | 1.91E+08 | A        | G   | exonic       | FRG1      | nonsynonymous SNV | FRG1:NM_004477:exon3:c.A196G:p.K66E                                                         | ID=COSM232360;OCCURENCE=1(skin)  | rs112612436 | B  |
| chr4 | 1.91E+08 | 1.91E+08 | C        | T   | exonic       | FRG1      | nonsynonymous SNV | FRG1:NM_004477:exon4:c.C293T:p.T98M                                                         | NA                               | rs201275486 | B  |
| chr4 | 1.91E+08 | 1.91E+08 | G        | A   | exonic       | FRG1      | nonsynonymous SNV | FRG1:NM_004477:exon5:c.G383A:p.R128H                                                        | OSM1054421;OCCURENCE=1(endometri | rs75585360  | P  |
| chr4 | 1.91E+08 | 1.91E+08 | A        | G   | exonic       | FRG1      | nonsynonymous SNV | FRG1:NM_004477:exon7:c.A568G:p.K190E                                                        | NA                               | rs184307882 | B  |
| chr4 | 1.91E+08 | 1.91E+08 | G        | A   | exonic       | FRG1      | nonsynonymous SNV | FRG1:NM_004477:exon7:c.G604A:p.V202I                                                        | NA                               | rs6846627   | B  |
| chr4 | 1.91E+08 | 1.91E+08 | T        | C   | exonic       | FRG1      | synonymous SNV    | FRG1:NM_004477:exon7:c.T627C:p.Y209Y                                                        | NA                               | rs75112782  | NA |
| chr5 | 185498   | 185498   | C        | T   | UTR3         | PLEKHG4B  | NA                | NA                                                                                          | NA                               | rs7727015   | NA |
| chr5 | 661392   | 661392   | G        | T   | UTR3         | TPPP      | NA                | NA                                                                                          | NA                               | rs13159892  | NA |
| chr5 | 796054   | 796055   | CT       | -   | UTR3         | ZDHHC11   | NA                | NA                                                                                          | NA                               | NA          | NA |
| chr5 | 843815   | 843815   | C        | T   | exonic       | ZDHHC11   | synonymous SNV    | ZDHHC11:NM_024786:exon4:c.G528A:p.S176S                                                     | NA                               | rs71591190  | NA |
| chr5 | 1222213  | 1222214  | TG       | -   | UTR3         | SLC6A19   | NA                | NA                                                                                          | NA                               | rs35482871  | NA |
| chr5 | 1572289  | 1572289  | A        | G   | ncRNA_exonic | SDHAP3    | NA                | NA                                                                                          | NA                               | rs147001297 | NA |
| chr5 | 6311304  | 6311304  | T        | G   | ncRNA_exonic | FLJ33360  | NA                | NA                                                                                          | NA                               | rs56073709  | NA |
| chr5 | 9036071  | 9036071  | -        | A   | UTR3         | SEMA5A    | NA                | NA                                                                                          | NA                               | NA          | NA |
| chr5 | 10278910 | 10278910 | C        | A   | UTR3         | CMBL      | NA                | NA                                                                                          | NA                               | NA          | NA |
| chr5 | 10279657 | 10279658 | TT       | -   | UTR3         | CMBL      | NA                | NA                                                                                          | NA                               | rs140959227 | NA |
| chr5 | 10657091 | 10657091 | -        | AA  | UTR3         | ANKRD33B  | NA                | NA                                                                                          | NA                               | NA          | NA |

|      |          |          |         |             |              |                              |                   |                                                                                                                                                                     |            |             |    |
|------|----------|----------|---------|-------------|--------------|------------------------------|-------------------|---------------------------------------------------------------------------------------------------------------------------------------------------------------------|------------|-------------|----|
| chr5 | 10972889 | 10972889 | T       | -           | UTR3         | CTNND2                       | NA                | NA                                                                                                                                                                  | NA         | rs70947237  | NA |
| chr5 | 13701536 | 13701536 | T       | C           | exonic       | DNAH5                        | nonsynonymous SNV | DNAH5:NM_001369:exon77:c.A13348G:p.I4450V                                                                                                                           | NA         | rs3734110   | B  |
| chr5 | 14696103 | 14696104 | TT      | -           | UTR3         | FAM105B                      | NA                | NA                                                                                                                                                                  | NA         | NA          | NA |
| chr5 | 16508898 | 16508898 | T       | C           | UTR5         | FAM134B                      | NA                | NA                                                                                                                                                                  | NA         | rs33684     | NA |
| chr5 | 16662426 | 16662432 | TTTTTTT | -           | UTR3         | MYO10                        | NA                | NA                                                                                                                                                                  | NA         | NA          | NA |
| chr5 | 17217178 | 17217178 | -       | GT          | ncRNA_exonic | LOC285696                    | NA                | NA                                                                                                                                                                  | NA         | NA          | NA |
| chr5 | 21586917 | 21586917 | -       | AA          | ncRNA_exonic | GUSBP1                       | NA                | NA                                                                                                                                                                  | NA         | NA          | NA |
| chr5 | 23526971 | 23526971 | C       | A           | exonic       | PRDM9                        | nonsynonymous SNV | PRDM9:NM_020227:exon11:c.C1774A:p.Q592K                                                                                                                             | NA         | NA          | B  |
| chr5 | 31317952 | 31317952 | T       | C           | exonic       | CDH6                         | synonymous SNV    | CDH6:NM_004932:exon11:c.T1803C:p.H601H                                                                                                                              | NA         | rs2229575   | NA |
| chr5 | 33938092 | 33938092 | G       | C           | exonic       | RXFP3                        | nonsynonymous SNV | RXFP3:NM_016568:exon1:c.G1247C:p.R416P                                                                                                                              | NA         | NA          | D  |
| chr5 | 34908276 | 34908276 | -       | TT          | UTR3         | RAD1                         | NA                | NA                                                                                                                                                                  | NA         | NA          | NA |
| chr5 | 34956158 | 34956158 | A       | -           | UTR3         | DNAJC21                      | NA                | NA                                                                                                                                                                  | NA         | NA          | NA |
| chr5 | 35644621 | 35644621 | T       | C           | exonic       | SPEF2                        | synonymous SNV    | VM_024867:exon4:c.T579C:p.I193I,SPEF2:NM_144722:exon4:c.T579C:                                                                                                      | NA         | rs7706444   | NA |
| chr5 | 36242212 | 36242212 | T       | C           | UTR5         | NADKD1                       | NA                | NA                                                                                                                                                                  | NA         | rs67061065  | NA |
| chr5 | 40692116 | 40692116 | G       | A           | exonic       | PTGER4                       | nonsynonymous SNV | PTGER4:NM_000958:exon3:c.G1103A:p.R368K                                                                                                                             | NA         | NA          | P  |
| chr5 | 40964885 | 40964885 | A       | T           | exonic       | C7                           | nonsynonymous SNV | C7:NM_000587:exon14:c.A1792T:p.T598S                                                                                                                                | NA         | rs60714178  | NA |
| chr5 | 42756940 | 42756940 | C       | T           | UTR5         | CCDC152                      | NA                | NA                                                                                                                                                                  | NA         | rs3797310   | NA |
| chr5 | 42801949 | 42801949 | A       | G           | UTR3         | CCDC152                      | NA                | NA                                                                                                                                                                  | NA         | rs230816    | NA |
| chr5 | 42802310 | 42802310 | A       | G           | UTR3         | CCDC152                      | NA                | NA                                                                                                                                                                  | NA         | rs28919916  | NA |
| chr5 | 52193287 | 52193287 | C       | T           | exonic       | ITGA1                        | synonymous SNV    | ITGA1:NM_181501:exon10:c.C1092T:p.A364A                                                                                                                             | rs1531545  | NA          | NA |
| chr5 | 54274656 | 54274656 | -       | A           | UTR3         | ESM1                         | NA                | NA                                                                                                                                                                  | NA         | rs35235179  | NA |
| chr5 | 55206444 | 55206444 | G       | A           | exonic       | IL31RA                       | nonsynonymous SNV | IL31RA:NM_015299:exon11:c.G1586A:p.S529N,IL31RA:NM_015299:exon11:c.G1586A:p.S529N,IL31RA:NM_015299:exon11:c.G1586A:p.S529N,IL31RA:NM_015299:exon11:c.G1586A:p.S529N | NA         | rs161704    | P  |
| chr5 | 59825300 | 59825300 | T       | C           | ncRNA_exonic | PART1                        | NA                | NA                                                                                                                                                                  | NA         | rs26949     | NA |
| chr5 | 59842971 | 59842971 | A       | G           | ncRNA_exonic | PART1                        | NA                | NA                                                                                                                                                                  | NA         | rs153152    | NA |
| chr5 | 61000547 | 61000548 | TT      | -           | UTR3         | C5orf64                      | NA                | NA                                                                                                                                                                  | NA         | rs140973829 | NA |
| chr5 | 61874567 | 61874567 | G       | T           | ncRNA_exonic | IPO11-LRRC70                 | NA                | NA                                                                                                                                                                  | NA         | NA          | NA |
| chr5 | 61874620 | 61874620 | A       | -           | ncRNA_exonic | IPO11-LRRC70                 | NA                | NA                                                                                                                                                                  | NA         | NA          | NA |
| chr5 | 63668039 | 63668039 | A       | G           | UTR3         | RNF180                       | NA                | NA                                                                                                                                                                  | NA         | rs3797052   | NA |
| chr5 | 64920159 | 64920159 | T       | G           | UTR5         | TRIM23                       | NA                | NA                                                                                                                                                                  | NA         | NA          | NA |
| chr5 | 64963082 | 64963082 | -       | CT          | UTR3         | SGTB                         | NA                | NA                                                                                                                                                                  | NA         | rs2067306   | NA |
| chr5 | 64963466 | 64963469 | TTTG    | -           | UTR3         | SGTB                         | NA                | NA                                                                                                                                                                  | NA         | rs33916729  | NA |
| chr5 | 66492591 | 66492591 | G       | A           | UTR5         | CD180                        | NA                | NA                                                                                                                                                                  | NA         | NA          | NA |
| chr5 | 68739836 | 68739836 | -       | AAAAAAA     | intergenic   | 'ELD2(dist=1946),OCLN(dist=4 | NA                | NA                                                                                                                                                                  | NA         | NA          | NA |
| chr5 | 69723444 | 69723444 | A       | G           | ncRNA_exonic | GTF2H2B                      | NA                | NA                                                                                                                                                                  | NA         | rs162961    | NA |
| chr5 | 70672628 | 70672629 | TT      | -           | ncRNA_exonic | PMCHL2                       | NA                | NA                                                                                                                                                                  | NA         | NA          | NA |
| chr5 | 70673207 | 70673207 | A       | -           | ncRNA_exonic | PMCHL2                       | NA                | NA                                                                                                                                                                  | NA         | NA          | NA |
| chr5 | 70800475 | 70800475 | C       | T           | exonic       | BDP1                         | nonsynonymous SNV | BDP1:NM_018429:exon16:c.C2269T:p.R757C                                                                                                                              | NA         | rs3761966   | NA |
| chr5 | 70883136 | 70883136 | A       | G           | UTR5         | MCCC2                        | NA                | NA                                                                                                                                                                  | NA         | rs11746722  | NA |
| chr5 | 70952934 | 70952934 | C       | T           | UTR3         | MCCC2                        | NA                | NA                                                                                                                                                                  | NA         | rs1135667   | NA |
| chr5 | 72876880 | 72876880 | T       | -           | UTR3         | UTP15                        | NA                | NA                                                                                                                                                                  | NA         | NA          | NA |
| chr5 | 74506658 | 74506658 | C       | T           | exonic       | ANKRD31                      | synonymous SNV    | ANKRD31:NM_001164443:exon4:c.G321A:p.L107L                                                                                                                          | rs2219745  | NA          | NA |
| chr5 | 75001582 | 75001582 | A       | G           | exonic       | POC5                         | nonsynonymous SNV | M_152408:exon3:c.T179C:p.I60T,POC5:NM_001099271:exon4:c.T254A                                                                                                       | rs17672542 | NA          | NA |
| chr5 | 75379321 | 75379321 | G       | C           | UTR5         | SV2C                         | NA                | NA                                                                                                                                                                  | NA         | rs30199     | NA |
| chr5 | 75948650 | 75948650 | A       | G           | exonic       | IQGAP2                       | nonsynonymous SNV | IQGAP2:NM_006633:exon18:c.A2170G:p.I724V                                                                                                                            | rs2431363  | B           | NA |
| chr5 | 76003258 | 76003258 | C       | T           | UTR3         | IQGAP2                       | NA                | NA                                                                                                                                                                  | NA         | rs464494    | NA |
| chr5 | 76007997 | 76007998 | AA      | -           | upstream     | NCRUPAR                      | NA                | NA                                                                                                                                                                  | NA         | NA          | NA |
| chr5 | 76129965 | 76129965 | -       | ATAT        | UTR3         | F2RL1                        | NA                | NA                                                                                                                                                                  | NA         | rs35226539  | NA |
| chr5 | 78181577 | 78181577 | T       | C           | exonic       | ARSB                         | synonymous SNV    | ARSB:NM_000046:exon5:c.A972G:p.G324G,ARSB:NM_198709:exon6:c.A972G:                                                                                                  | rs72762973 | NA          | NA |
| chr5 | 78365401 | 78365401 | G       | A           | exonic       | DMGDH                        | nonsynonymous SNV | DMGDH:NM_013391:exon1:c.C43T:p.R15W                                                                                                                                 | NA         | NA          | P  |
| chr5 | 79048562 | 79048562 | C       | T           | exonic       | CMYA5                        | synonymous SNV    | CMYA5:NM_153610:exon6:c.C11055T:p.F3685F                                                                                                                            | rs1366272  | NA          | NA |
| chr5 | 82936729 | 82936729 | T       | -           | UTR3         | HAPLN1                       | NA                | NA                                                                                                                                                                  | NA         | NA          | NA |
| chr5 | 83239133 | 83239133 | A       | -           | UTR3         | EDIL3                        | NA                | NA                                                                                                                                                                  | NA         | rs146077789 | NA |
| chr5 | 87980581 | 87980581 | -       | TCTC        | ncRNA_exonic | LINC00461                    | NA                | NA                                                                                                                                                                  | NA         | NA          | NA |
| chr5 | 94786142 | 94786142 | C       | T           | UTR3         | FAM81B                       | NA                | NA                                                                                                                                                                  | NA         | rs7709828   | NA |
| chr5 | 95115959 | 95115959 | C       | T           | exonic       | RHOBTB3                      | nonsynonymous SNV | RHOBTB3:NM_014899:exon9:c.C1286T:p.T429M                                                                                                                            | rs41276257 | P           | NA |
| chr5 | 96111093 | 96111096 | TAGT    | -           | UTR3         | ERAP1                        | NA                | NA                                                                                                                                                                  | NA         | rs138961474 | NA |
| chr5 | 96111228 | 96111228 | A       | G           | UTR3         | ERAP1                        | NA                | NA                                                                                                                                                                  | NA         | rs3198304   | NA |
| chr5 | 96111801 | 96111801 | -       | TG          | UTR3         | ERAP1                        | NA                | NA                                                                                                                                                                  | NA         | rs148692674 | NA |
| chr5 | 96111927 | 96111927 | -       | :CATTTCATG. | UTR3         | ERAP1                        | NA                | NA                                                                                                                                                                  | NA         | rs142866043 | NA |
| chr5 | 96143836 | 96143836 | G       | A           | UTR5         | ERAP1                        | NA                | NA                                                                                                                                                                  | NA         | NA          | NA |
| chr5 | 96143837 | 96143837 | T       | G           | UTR5         | ERAP1                        | NA                | NA                                                                                                                                                                  | NA         | NA          | NA |
| chr5 | 96143838 | 96143838 | T       | A           | UTR5         | ERAP1                        | NA                | NA                                                                                                                                                                  | NA         | NA          | NA |
| chr5 | 96245439 | 96245439 | C       | T           | exonic       | ERAP2                        | synonymous SNV    | ERAP2:NM_022350:exon15:c.C2101T:p.S775S,ERAP2:NM_022350:exon15:c.C2101T:p.S775S                                                                                     | rs1056893  | NA          | NA |
| chr5 | 96322360 | 96322360 | G       | A           | exonic       | LNPEP                        | nonsynonymous SNV | LNPEP:NM_005575:exon4:c.G1117A:p.V373I,LNPEP:NM_175920:exon4:c.G1075A:p.V373I                                                                                       | rs41276279 | B           | NA |
| chr5 | 98132052 | 98132052 | A       | C           | UTR3         | RGMB                         | NA                | NA                                                                                                                                                                  | NA         | rs1053451   | NA |
| chr5 | 98218907 | 98218907 | C       | A           | exonic       | CHD1                         | nonsynonymous SNV | CHD1:NM_001270:exon18:c.G2603T:p.G868V                                                                                                                              | NA         | NA          | D  |

|      |          |          |           |        |              |           |                   |                                                                |                                 |             |    |
|------|----------|----------|-----------|--------|--------------|-----------|-------------------|----------------------------------------------------------------|---------------------------------|-------------|----|
| chr5 | 1.03E+08 | 1.03E+08 | A         | G      | exonic       | NUDT12    | synonymous SNV    | NUDT12:NM_031438:exon4:c.T901C:p.L301L                         | NA                              | rs10045774  | NA |
| chr5 | 1.07E+08 | 1.07E+08 | -         | T      | UTR3         | EFNA5     | NA                | NA                                                             | NA                              | NA          | NA |
| chr5 | 1.07E+08 | 1.07E+08 | -         | AA     | UTR3         | EFNA5     | NA                | NA                                                             | NA                              | NA          | NA |
| chr5 | 1.07E+08 | 1.07E+08 | G         | A      | UTR3         | EFNA5     | NA                | NA                                                             | NA                              | NA          | NA |
| chr5 | 1.07E+08 | 1.07E+08 | A         | C      | UTR3         | FBXL17    | NA                | NA                                                             | NA                              | NA          | NA |
| chr5 | 1.1E+08  | 1.1E+08  | T         | -      | UTR3         | WDR36     | NA                | NA                                                             | NA                              | NA          | NA |
| chr5 | 1.1E+08  | 1.1E+08  | T         | G      | UTR3         | WDR36     | NA                | NA                                                             | NA                              | NA          | NA |
| chr5 | 1.15E+08 | 1.15E+08 | AAAA      | -      | UTR3         | PGGT1B    | NA                | NA                                                             | NA                              | NA          | NA |
| chr5 | 1.15E+08 | 1.15E+08 | C         | A      | UTR3         | TMED7     | NA                | NA                                                             | NA                              | NA          | NA |
| chr5 | 1.15E+08 | 1.15E+08 | G         | A      | UTR3         | AP3S1     | NA                | NA                                                             | NA                              | rs6895932   | NA |
| chr5 | 1.15E+08 | 1.15E+08 | G         | C      | UTR5         | AQPEP     | NA                | NA                                                             | ID=COSN404863;OCCURENCE=1(lung) | rs9326980   | NA |
| chr5 | 1.15E+08 | 1.15E+08 | A         | G      | exonic       | AQPEP     | synonymous SNV    | AQPEP:NM_173800:exon1:c.A204G:p.P68P                           | NA                              | rs12522632  | NA |
| chr5 | 1.16E+08 | 1.16E+08 | T         | G      | UTR3         | SEMA6A    | NA                | NA                                                             | NA                              | rs12523054  | NA |
| chr5 | 1.22E+08 | 1.22E+08 | CACACACA  | -      | UTR3         | SNX2      | NA                | NA                                                             | NA                              | rs138443824 | NA |
| chr5 | 1.22E+08 | 1.22E+08 | -         | A      | UTR3         | SNX24     | NA                | NA                                                             | NA                              | NA          | NA |
| chr5 | 1.22E+08 | 1.22E+08 | A         | G      | UTR5         | PRDM6     | NA                | NA                                                             | NA                              | rs72800825  | NA |
| chr5 | 1.26E+08 | 1.26E+08 | A         | G      | UTR3         | LMNB1     | NA                | NA                                                             | NA                              | NA          | NA |
| chr5 | 1.26E+08 | 1.26E+08 | C         | T      | UTR3         | 3-Mar     | NA                | NA                                                             | NA                              | NA          | NA |
| chr5 | 1.28E+08 | 1.28E+08 | -         | T      | UTR3         | SLC12A2   | NA                | NA                                                             | NA                              | NA          | NA |
| chr5 | 1.28E+08 | 1.28E+08 | G         | C      | exonic       | FBN2      | synonymous SNV    | FBN2:NM_001999:exon1:c.C183G:p.P61P                            | NA                              | rs73348287  | NA |
| chr5 | 1.31E+08 | 1.31E+08 | C         | T      | UTR3         | RAPGEF6   | NA                | NA                                                             | NA                              | NA          | NA |
| chr5 | 1.31E+08 | 1.31E+08 | T         | -      | UTR3         | RAPGEF6   | NA                | NA                                                             | NA                              | NA          | NA |
| chr5 | 1.31E+08 | 1.31E+08 | G         | A      | UTR3         | RAPGEF6   | NA                | NA                                                             | NA                              | NA          | NA |
| chr5 | 1.32E+08 | 1.32E+08 | C         | T      | exonic       | SLC22A4   | nonsynonymous SNV | SLC22A4:NM_003059:exon9:c.C1507T:p.L503F                       | NA                              | rs1050152   | B  |
| chr5 | 1.32E+08 | 1.32E+08 | A         | G      | UTR5         | RAD50     | NA                | NA                                                             | NA                              | NA          | NA |
| chr5 | 1.32E+08 | 1.32E+08 | C         | T      | UTR3         | CCNI2     | NA                | NA                                                             | NA                              | NA          | NA |
| chr5 | 1.32E+08 | 1.32E+08 | TTT       | -      | UTR3         | CCNI2     | NA                | NA                                                             | NA                              | NA          | NA |
| chr5 | 1.34E+08 | 1.34E+08 | AAAT      | -      | UTR3         | C5orf24   | NA                | NA                                                             | NA                              | rs202226698 | NA |
| chr5 | 1.35E+08 | 1.35E+08 | TTTTTTTTT | -      | UTR3         | CXCL14    | NA                | NA                                                             | NA                              | NA          | NA |
| chr5 | 1.35E+08 | 1.35E+08 | GGG       | -      | ncRNA_exonic | SMAD5-AS1 | NA                | NA                                                             | NA                              | NA          | NA |
| chr5 | 1.36E+08 | 1.36E+08 | -         | AA     | UTR3         | SMAD5     | NA                | NA                                                             | NA                              | NA          | NA |
| chr5 | 1.37E+08 | 1.37E+08 | A         | -      | UTR3         | HNRNPAO   | NA                | NA                                                             | NA                              | NA          | NA |
| chr5 | 1.37E+08 | 1.37E+08 | G         | A      | exonic       | PKD2L2    | nonsynonymous SNV | .001258448:exon8:c.G1144A;p.V382I,PKD2L2:NM_014386:exon8:c.G1: | NA                              | rs1880458   | B  |
| chr5 | 1.38E+08 | 1.38E+08 | G         | C      | exonic       | EGR1      | synonymous SNV    | EGR1:NM_001964:exon2:c.G993C:p.T331T                           | NA                              | NA          | NA |
| chr5 | 1.39E+08 | 1.39E+08 | -         | T      | UTR5         | MATR3     | NA                | NA                                                             | NA                              | rs112107315 | NA |
| chr5 | 1.39E+08 | 1.39E+08 | T         | A      | UTR5         | MATR3     | NA                | NA                                                             | NA                              | rs12153162  | NA |
| chr5 | 1.39E+08 | 1.39E+08 | A         | -      | UTR3         | PURA      | NA                | NA                                                             | NA                              | NA          | NA |
| chr5 | 1.4E+08  | 1.4E+08  | A         | C      | UTR3         | WDR55     | NA                | NA                                                             | NA                              | NA          | NA |
| chr5 | 1.41E+08 | 1.41E+08 | A         | C      | UTR3         | PCDHB6    | NA                | NA                                                             | NA                              | rs56172324  | NA |
| chr5 | 1.41E+08 | 1.41E+08 | -         | ACACAC | UTR5         | PCDHB16   | NA                | NA                                                             | NA                              | NA          | NA |
| chr5 | 1.41E+08 | 1.41E+08 | A         | G      | exonic       | PCDHB16   | synonymous SNV    | PCDHB16:NM_020957:exon1:c.A1524G:p.A508A                       | NA                              | rs2697533   | NA |
| chr5 | 1.41E+08 | 1.41E+08 | G         | T      | UTR3         | PCDHB9    | NA                | NA                                                             | NA                              | NA          | NA |
| chr5 | 1.41E+08 | 1.41E+08 | A         | G      | UTR3         | PCDHB9    | NA                | NA                                                             | NA                              | rs2910324   | NA |
| chr5 | 1.41E+08 | 1.41E+08 | C         | T      | UTR3         | PCDHB9    | NA                | NA                                                             | NA                              | rs2907325   | NA |
| chr5 | 1.41E+08 | 1.41E+08 | -         | A      | UTR3         | PCDHB9    | NA                | NA                                                             | NA                              | NA          | NA |
| chr5 | 1.44E+08 | 1.44E+08 | -         | T      | UTR3         | YIPF5     | NA                | NA                                                             | NA                              | NA          | NA |
| chr5 | 1.44E+08 | 1.44E+08 | -         | TT     | UTR3         | YIPF5     | NA                | NA                                                             | NA                              | rs138694329 | NA |
| chr5 | 1.44E+08 | 1.44E+08 | T         | -      | UTR3         | YIPF5     | NA                | NA                                                             | NA                              | rs144356469 | NA |
| chr5 | 1.45E+08 | 1.45E+08 | C         | A      | UTR3         | LARS      | NA                | NA                                                             | NA                              | rs58569901  | NA |
| chr5 | 1.46E+08 | 1.46E+08 | G         | A      | exonic       | LARS      | synonymous SNV    | LARS:NM_020117:exon28:c.C2889T:p.N963N                         | NA                              | rs11540216  | NA |
| chr5 | 1.46E+08 | 1.46E+08 | G         | A      | exonic       | LARS      | synonymous SNV    | LARS:NM_020117:exon19:c.C1747T:p.L583L                         | NA                              | rs11540217  | NA |
| chr5 | 1.46E+08 | 1.46E+08 | T         | -      | UTR3         | RBM27     | NA                | NA                                                             | NA                              | NA          | NA |
| chr5 | 1.46E+08 | 1.46E+08 | A         | G      | exonic       | TCERG1    | synonymous SNV    | 1040006:exon21:c.A3057G;p.S1019S,TCERG1:NM_006706:exon22:c.A   | NA                              | rs4705103   | NA |
| chr5 | 1.48E+08 | 1.48E+08 | TTTT      | -      | UTR3         | SH3TC2    | NA                | NA                                                             | NA                              | NA          | NA |
| chr5 | 1.48E+08 | 1.48E+08 | G         | A      | exonic       | SH3TC2    | nonsynonymous SNV | SH3TC2:NM_024577:exon14:c.C3239T:p.P1080L                      | NA                              | NA          | B  |
| chr5 | 1.49E+08 | 1.49E+08 | G         | C      | ncRNA_exonic | MIR143HG  | NA                | NA                                                             | NA                              | rs28418464  | NA |
| chr5 | 1.49E+08 | 1.49E+08 | -         | T      | ncRNA_exonic | MIR143HG  | NA                | NA                                                             | NA                              | NA          | NA |
| chr5 | 1.49E+08 | 1.49E+08 | A         | G      | exonic       | ARHGEF37  | nonsynonymous SNV | ARHGEF37:NM_001001669:exon12:c.A1810G:p.M604V                  | NA                              | rs1135093   | B  |
| chr5 | 1.49E+08 | 1.49E+08 | T         | C      | UTR3         | PDE6A     | NA                | NA                                                             | NA                              | rs759816    | NA |
| chr5 | 1.49E+08 | 1.49E+08 | A         | G      | UTR3         | PDE6A     | NA                | NA                                                             | NA                              | rs2005909   | NA |
| chr5 | 1.5E+08  | 1.5E+08  | TTA       | -      | UTR3         | CAMK2A    | NA                | NA                                                             | NA                              | rs147490193 | NA |
| chr5 | 1.5E+08  | 1.5E+08  | T         | G      | UTR3         | SYNPO     | NA                | NA                                                             | NA                              | NA          | NA |
| chr5 | 1.5E+08  | 1.5E+08  | C         | A      | UTR5         | SMIM3     | NA                | NA                                                             | NA                              | NA          | NA |
| chr5 | 1.51E+08 | 1.51E+08 | A         | G      | UTR5         | GM2A      | NA                | NA                                                             | NA                              | rs2277028   | NA |
| chr5 | 1.51E+08 | 1.51E+08 | A         | G      | exonic       | GM2A      | nonsynonymous SNV | v_000405:exon2:c.A175G;p.I59V,GM2A:NM_001167607:exon2:c.A17!   | NA                              | rs153477    | B  |
| chr5 | 1.51E+08 | 1.51E+08 | A         | G      | exonic       | GM2A      | nonsynonymous SNV | _000405:exon2:c.A205G;p.M69V,GM2A:NM_001167607:exon2:c.A20!    | NA                              | rs153478    | B  |

|      |          |          |           |    |              |           |                   |                                                               |            |             |    |
|------|----------|----------|-----------|----|--------------|-----------|-------------------|---------------------------------------------------------------|------------|-------------|----|
| chr5 | 1.51E+08 | 1.51E+08 | -         | T  | UTR3         | GM2A      | NA                | NA                                                            | NA         | rs113437403 | NA |
| chr5 | 1.51E+08 | 1.51E+08 | -         | A  | UTR3         | SLC36A2   | NA                | NA                                                            | NA         | NA          | NA |
| chr5 | 1.51E+08 | 1.51E+08 | G         | A  | exonic       | SLC36A2   | synonymous SNV    | SLC36A2:NM_181776:exon2:c.C187T:p.L63L                        | NA         | rs192192    | NA |
| chr5 | 1.51E+08 | 1.51E+08 | GCA       | -  | UTR5         | SLC36A1   | NA                | NA                                                            | NA         | NA          | NA |
| chr5 | 1.51E+08 | 1.51E+08 | T         | -  | UTR3         | G3BP1     | NA                | NA                                                            | NA         | NA          | NA |
| chr5 | 1.51E+08 | 1.51E+08 | G         | A  | UTR5         | GLRA1     | NA                | NA                                                            | NA         | rs2071221   | NA |
| chr5 | 1.54E+08 | 1.54E+08 | G         | A  | UTR5         | HAND1     | NA                | NA                                                            | NA         | rs181499341 | NA |
| chr5 | 1.54E+08 | 1.54E+08 | C         | T  | UTR3         | FAXDC2    | NA                | NA                                                            | NA         | rs4865      | NA |
| chr5 | 1.54E+08 | 1.54E+08 | C         | T  | UTR3         | MRPL22    | NA                | NA                                                            | NA         | rs286595    | NA |
| chr5 | 1.57E+08 | 1.57E+08 | A         | -  | UTR3         | CYFIP2    | NA                | NA                                                            | NA         | NA          | NA |
| chr5 | 1.57E+08 | 1.57E+08 | T         | C  | UTR5         | THG1L     | NA                | NA                                                            | NA         | rs2270820   | NA |
| chr5 | 1.57E+08 | 1.57E+08 | G         | T  | exonic       | THG1L     | stopgain SNV      | THG1L:NM_017872:exon3:c.G436T:p.E146X                         | NA         | rs78234336  | NA |
| chr5 | 1.58E+08 | 1.58E+08 | T         | -  | UTR3         | EBF1      | NA                | NA                                                            | NA         | NA          | NA |
| chr5 | 1.59E+08 | 1.59E+08 | A         | -  | UTR5         | EBF1      | NA                | NA                                                            | NA         | rs5872586   | NA |
| chr5 | 1.59E+08 | 1.59E+08 | CACA      | -  | UTR3         | UBLCP1    | NA                | NA                                                            | NA         | NA          | NA |
| chr5 | 1.6E+08  | 1.6E+08  | -         | A  | UTR3         | PWWP2A    | NA                | NA                                                            | NA         | NA          | NA |
| chr5 | 1.6E+08  | 1.6E+08  | C         | T  | exonic       | FABP6     | nonsynonymous SNV | :p.T79M,FABP6:NM_001040442:exon4:c.C383T:p.T128M,FABP6:NM_C   | NA         | rs1130435   | B  |
| chr5 | 1.61E+08 | 1.61E+08 | C         | T  | UTR3         | GABRB2    | NA                | NA                                                            | NA         | NA          | NA |
| chr5 | 1.61E+08 | 1.61E+08 | G         | A  | UTR3         | GABRB2    | NA                | NA                                                            | NA         | NA          | NA |
| chr5 | 1.63E+08 | 1.63E+08 | C         | G  | UTR5         | CCNG1     | NA                | NA                                                            | NA         | rs2069339   | NA |
| chr5 | 1.7E+08  | 1.7E+08  | C         | T  | exonic       | LCP2      | synonymous SNV    | LCP2:NM_005565:exon8:c.G564A:p.V188V                          | NA         | rs2292254   | NA |
| chr5 | 1.71E+08 | 1.71E+08 | T         | -  | UTR3         | STK10     | NA                | NA                                                            | NA         | rs11353357  | NA |
| chr5 | 1.72E+08 | 1.72E+08 | -         | A  | UTR3         | ERGIC1    | NA                | NA                                                            | NA         | NA          | NA |
| chr5 | 1.73E+08 | 1.73E+08 | -         | T  | UTR3         | CPEB4     | NA                | NA                                                            | NA         | NA          | NA |
| chr5 | 1.75E+08 | 1.75E+08 | A         | -  | UTR5         | HRH2      | NA                | NA                                                            | NA         | NA          | NA |
| chr5 | 1.75E+08 | 1.75E+08 | G         | A  | exonic       | THOC3     | synonymous SNV    | THOC3:NM_032361:exon2:c.C357T:p.S119S                         | NA         | rs200408233 | NA |
| chr5 | 1.77E+08 | 1.77E+08 | AAAAAAAAA | -  | UTR3         | DBN1      | NA                | NA                                                            | NA         | NA          | NA |
| chr5 | 1.77E+08 | 1.77E+08 | T         | G  | UTR3         | DBN1      | NA                | NA                                                            | NA         | NA          | NA |
| chr5 | 1.77E+08 | 1.77E+08 | A         | C  | intronic     | FAM193B   | NA                | NA                                                            | NA         | NA          | NA |
| chr5 | 1.77E+08 | 1.77E+08 | T         | G  | exonic       | PROP1     | nonsynonymous SNV | PROP1:NM_006261:exon3:c.A640C:p.M214L                         | NA         | NA          | B  |
| chr5 | 1.77E+08 | 1.77E+08 | A         | G  | exonic       | PROP1     | synonymous SNV    | PROP1:NM_006261:exon3:c.T636C:p.P212P                         | NA         | NA          | NA |
| chr5 | 1.77E+08 | 1.77E+08 | T         | G  | exonic       | PROP1     | synonymous SNV    | PROP1:NM_006261:exon3:c.A630C:p.P210P                         | NA         | NA          | NA |
| chr5 | 1.78E+08 | 1.78E+08 | T         | C  | exonic       | RMND5B    | synonymous SNV    | RMND5B:NM_022762:exon9:c.T888C:p.P296P                        | NA         | rs61751561  | NA |
| chr5 | 1.78E+08 | 1.78E+08 | T         | C  | exonic       | ZNF354B   | synonymous SNV    | ZNF354B:NM_058230:exon4:c.T243C:p.G81G                        | rs11952817 | NA          | NA |
| chr5 | 1.79E+08 | 1.79E+08 | A         | G  | exonic       | ADAMTS2   | synonymous SNV    | M_014244:exon2:c.T321C:p.S107S,ADAMTS2:NM_021599:exon2:c.T3   | NA         | rs2271212   | NA |
| chr5 | 1.79E+08 | 1.79E+08 | AG        | -  | UTR3         | HNRNPH1   | NA                | NA                                                            | NA         | NA          | NA |
| chr5 | 1.79E+08 | 1.79E+08 | G         | A  | exonic       | SQSTM1    | synonymous SNV    | :R312R,SQSTM1:NM_001142298:exon7:c.G684A:p.R228R,SQSTM1:NI    | NA         | rs4797      | NA |
| chr5 | 1.79E+08 | 1.79E+08 | G         | A  | exonic       | C5orf45   | synonymous SNV    | IM_001017987:exon1:c.C45T:p.C15C,C5orf45:NM_016175:exon1:c.C4 | NA         | rs10060182  | NA |
| chr5 | 1.8E+08  | 1.8E+08  | C         | T  | ncRNA_exonic | LINC00847 | NA                | NA                                                            | NA         | rs899546    | NA |
| chr5 | 1.8E+08  | 1.8E+08  | A         | G  | intronic     | ZFP62     | NA                | NA                                                            | NA         | rs2127380   | NA |
| chr6 | 407630   | 407630   | T         | -  | UTR3         | IRF4      | NA                | NA                                                            | NA         | NA          | NA |
| chr6 | 2971853  | 2971853  | A         | G  | UTR5         | SERPINB6  | NA                | NA                                                            | NA         | NA          | NA |
| chr6 | 6007196  | 6007196  | G         | -  | UTR5         | NRN1      | NA                | NA                                                            | NA         | rs11285278  | NA |
| chr6 | 7247248  | 7247248  | T         | C  | exonic       | RREB1     | nonsynonymous SNV | p.L1467P,RREB1:NM_001168344:exon11:c.T4400C:p.L1467P,RREB1:N  | NA         | rs2256596   | B  |
| chr6 | 7249296  | 7249301  | GAGAGA    | -  | UTR3         | RREB1     | NA                | NA                                                            | NA         | rs4053178   | NA |
| chr6 | 7283735  | 7283735  | C         | T  | UTR3         | SSR1      | NA                | NA                                                            | NA         | rs111496266 | NA |
| chr6 | 7283759  | 7283759  | T         | C  | UTR3         | SSR1      | NA                | NA                                                            | NA         | rs9505115   | NA |
| chr6 | 7284948  | 7284948  | -         | T  | UTR3         | SSR1      | NA                | NA                                                            | NA         | NA          | NA |
| chr6 | 7285912  | 7285912  | A         | -  | UTR3         | SSR1      | NA                | NA                                                            | NA         | rs71649195  | NA |
| chr6 | 7287220  | 7287220  | C         | A  | UTR3         | SSR1      | NA                | NA                                                            | NA         | NA          | NA |
| chr6 | 7288297  | 7288297  | G         | A  | UTR3         | SSR1      | NA                | NA                                                            | NA         | rs8955      | NA |
| chr6 | 7289958  | 7289959  | CA        | -  | UTR3         | SSR1      | NA                | NA                                                            | NA         | rs16740     | NA |
| chr6 | 7611993  | 7611998  | TTTCTG    | -  | UTR3         | SNRNP48   | NA                | NA                                                            | NA         | rs146960918 | NA |
| chr6 | 10410434 | 10410434 | T         | G  | exonic       | TFAP2A    | synonymous SNV    | 162C:p.P54P,TFAP2A:NM_001042425:exon2:c.A168C:p.P56P,TFAP2A:l | NA         | NA          | NA |
| chr6 | 10723449 | 10723449 | A         | C  | UTR5         | TMEM14C   | NA                | NA                                                            | NA         | rs1045911   | NA |
| chr6 | 10763780 | 10763780 | A         | -  | UTR3         | MAK       | NA                | NA                                                            | NA         | rs35696238  | NA |
| chr6 | 10887251 | 10887251 | T         | C  | UTR5         | SYCP2L    | NA                | NA                                                            | NA         | rs9366663   | NA |
| chr6 | 10887253 | 10887253 | G         | C  | UTR5         | SYCP2L    | NA                | NA                                                            | NA         | rs9358956   | NA |
| chr6 | 13579828 | 13579828 | A         | C  | UTR5         | SIRT5     | NA                | NA                                                            | NA         | rs2804911   | NA |
| chr6 | 15521302 | 15521302 | -         | AA | UTR3         | JARID2    | NA                | NA                                                            | NA         | NA          | NA |
| chr6 | 15523807 | 15523807 | -         | A  | UTR3         | DTNBP1    | NA                | NA                                                            | NA         | rs142659737 | NA |
| chr6 | 17393781 | 17393781 | -         | C  | UTR5         | CAP2      | NA                | NA                                                            | NA         | NA          | NA |
| chr6 | 17799575 | 17799575 | A         | G  | exonic       | KIF13A    | synonymous SNV    | 01105567:exon22:c.T2712C:p.A904A,KIF13A:NM_001105568:exon22:c | NA         | rs3734235   | NA |
| chr6 | 18387815 | 18387815 | A         | C  | UTR5         | RNF144B   | NA                | NA                                                            | NA         | rs764885    | NA |
| chr6 | 18467582 | 18467582 | A         | G  | UTR3         | RNF144B   | NA                | NA                                                            | NA         | rs531972    | NA |
| chr6 | 18467626 | 18467626 | C         | T  | UTR3         | RNF144B   | NA                | NA                                                            | NA         | NA          | NA |

|      |          |          |           |   |                |                             |                   |                                                               |                                  |             |    |
|------|----------|----------|-----------|---|----------------|-----------------------------|-------------------|---------------------------------------------------------------|----------------------------------|-------------|----|
| chr6 | 20102263 | 20102263 | G         | A | UTR3           | MBOAT1                      | NA                | NA                                                            | NA                               | NA          | NA |
| chr6 | 20534770 | 20534770 | C         | T | UTR5           | CDKAL1                      | NA                | NA                                                            | NA                               | NA          | NA |
| chr6 | 20534778 | 20534778 | G         | T | UTR5           | CDKAL1                      | NA                | NA                                                            | NA                               | NA          | NA |
| chr6 | 20534791 | 20534791 | C         | T | UTR5           | CDKAL1                      | NA                | NA                                                            | NA                               | NA          | NA |
| chr6 | 21594175 | 21594175 | C         | T | UTR5           | SOX4                        | NA                | NA                                                            | NA                               | NA          | NA |
| chr6 | 22194615 | 22194616 | AA        | - | ncRNA_exonic   | LINC00340                   | NA                | NA                                                            | NA                               | NA          | NA |
| chr6 | 24719384 | 24719384 | A         | - | UTR5           | C6orf62                     | NA                | NA                                                            | NA                               | rs34131350  | NA |
| chr6 | 24805465 | 24805466 | AA        | - | UTR3           | FAM65B                      | NA                | NA                                                            | NA                               | rs67150453  | NA |
| chr6 | 25115296 | 25115296 | G         | T | ncRNA_exonic   | CMAHP                       | NA                | NA                                                            | NA                               | rs2273671   | NA |
| chr6 | 25619946 | 25619946 | A         | C | UTR3           | LRRC16A                     | NA                | NA                                                            | NA                               | NA          | NA |
| chr6 | 25913572 | 25913572 | G         | T | exonic         | SLC17A2                     | nonsynonymous SNV | SLC17A2:NM_005835:exon11:c.C1262A:p.P421Q                     | NA                               | NA          | P  |
| chr6 | 26637020 | 26637020 | C         | T | UTR3           | ZNF322                      | NA                | NA                                                            | NA                               | rs199645934 | NA |
| chr6 | 28411220 | 28411220 | T         | G | UTR5           | ZSCAN23                     | NA                | NA                                                            | NA                               | rs2531803   | NA |
| chr6 | 29640095 | 29640111 | AAATAAAT/ | - | UTR3           | MOG                         | NA                | NA                                                            | NA                               | NA          | NA |
| chr6 | 29856508 | 29856508 | T         | G | ncRNA_exonic   | HLA-H                       | NA                | NA                                                            | NA                               | rs200904024 | NA |
| chr6 | 29857105 | 29857105 | -         | C | ncRNA_exonic   | HLA-H                       | NA                | NA                                                            | NA                               | NA          | NA |
| chr6 | 29866970 | 29866970 | T         | C | intergenic     | -H(dist=8114),HCG4B(dist=25 | NA                | NA                                                            | NA                               | rs9259495   | NA |
| chr6 | 29867247 | 29867247 | A         | C | intergenic     | -H(dist=8391),HCG4B(dist=25 | NA                | NA                                                            | NA                               | rs3128995   | NA |
| chr6 | 29911222 | 29911222 | C         | T | exonic         | HLA-A                       | nonsynonymous SNV | _001242758:exon3:c.C521T:p.A174V,HLA-A:NM_002116:exon3:c.C521 | NA                               | rs1059535   | B  |
| chr6 | 29911240 | 29911240 | T         | G | exonic         | HLA-A                       | nonsynonymous SNV | _001242758:exon3:c.T539G:p.L180W,HLA-A:NM_002116:exon3:c.T539 | NA                               | rs9260156   | B  |
| chr6 | 29911246 | 29911246 | C         | T | exonic         | HLA-A                       | nonsynonymous SNV | _001242758:exon3:c.C545T:p.A182V,HLA-A:NM_002116:exon3:c.C545 | NA                               | rs1059539   | B  |
| chr6 | 29911970 | 29911970 | G         | A | exonic         | HLA-A                       | nonsynonymous SNV | _001242758:exon4:c.G691A:p.G231S,HLA-A:NM_002116:exon4:c.G691 | NA                               | rs1059578   | B  |
| chr6 | 29912087 | 29912087 | G         | T | exonic         | HLA-A                       | nonsynonymous SNV | _001242758:exon4:c.G808T:p.A270S,HLA-A:NM_002116:exon4:c.G808 | NA                               | rs1059632   | B  |
| chr6 | 29913355 | 29913355 | A         | G | UTR3           | HLA-A                       | NA                | NA                                                            | NA                               | NA          | NA |
| chr6 | 29913367 | 29913367 | G         | A | UTR3           | HLA-A                       | NA                | NA                                                            | NA                               | rs113042145 | NA |
| chr6 | 29913377 | 29913377 | C         | T | UTR3           | HLA-A                       | NA                | NA                                                            | NA                               | NA          | NA |
| chr6 | 29913383 | 29913383 | C         | T | UTR3           | HLA-A                       | NA                | NA                                                            | NA                               | NA          | NA |
| chr6 | 30075864 | 30075864 | A         | G | exonic         | TRIM31                      | synonymous SNV    | TRIM31:NM_007028:exon6:c.T849C:p.H283H                        | =COSM1131939;OCCURENCE=1(prostat | rs2023472   | NA |
| chr6 | 30078330 | 30078330 | C         | T | exonic         | TRIM31                      | synonymous SNV    | TRIM31:NM_007028:exon4:c.G639A:p.A213A                        | NA                               | rs2239529   | NA |
| chr6 | 30227745 | 30227745 | T         | G | ncRNA_exonic   | HLA-L                       | NA                | NA                                                            | NA                               | NA          | NA |
| chr6 | 30232250 | 30232250 | A         | G | ncRNA_exonic   | HLA-L                       | NA                | NA                                                            | NA                               | rs3130404   | NA |
| chr6 | 30232538 | 30232538 | G         | T | ncRNA_exonic   | HLA-L                       | NA                | NA                                                            | NA                               | rs28780091  | NA |
| chr6 | 30232672 | 30232672 | C         | T | ncRNA_exonic   | HLA-L                       | NA                | NA                                                            | NA                               | rs3129701   | NA |
| chr6 | 30234627 | 30234627 | A         | T | ncRNA_exonic   | HLA-L                       | NA                | NA                                                            | NA                               | rs3129831   | NA |
| chr6 | 30531427 | 30531427 | -         | T | UTR3           | PRR3                        | NA                | NA                                                            | NA                               | NA          | NA |
| chr6 | 30573725 | 30573725 | G         | T | exonic         | PPP1R10                     | synonymous SNV    | PPP1R10:NM_002714:exon10:c.C828A:p.I276I                      | NA                               | NA          | NA |
| chr6 | 30918925 | 30918925 | T         | C | exonic         | DPCR1                       | nonsynonymous SNV | DPCR1:NM_080870:exon2:c.T2684C:p.L895P                        | NA                               | NA          | NA |
| chr6 | 30919147 | 30919147 | T         | C | exonic         | DPCR1                       | nonsynonymous SNV | DPCR1:NM_080870:exon2:c.T2906C:p.V969A                        | NA                               | NA          | NA |
| chr6 | 30954516 | 30954516 | G         | C | exonic         | MUC21                       | synonymous SNV    | MUC21:NM_001010909:exon2:c.G564C:p.V188V                      | NA                               | NA          | NA |
| chr6 | 30955101 | 30955101 | G         | C | exonic         | MUC21                       | synonymous SNV    | MUC21:NM_001010909:exon2:c.G1149C:p.V383V                     | NA                               | rs9262395   | NA |
| chr6 | 31022500 | 31022500 | A         | C | ncRNA_intronic | HCG22                       | NA                | NA                                                            | NA                               | rs2523854   | NA |
| chr6 | 31026434 | 31026434 | A         | G | ncRNA_intronic | HCG22                       | NA                | NA                                                            | NA                               | rs2517523   | NA |
| chr6 | 31026534 | 31026534 | C         | T | ncRNA_intronic | HCG22                       | NA                | NA                                                            | NA                               | rs2523847   | NA |
| chr6 | 31088202 | 31088202 | A         | G | UTR5           | CDSN                        | NA                | NA                                                            | NA                               | rs2302399   | NA |
| chr6 | 31237767 | 31237767 | T         | C | exonic         | HLA-C                       | nonsynonymous SNV | _001243042:exon5:c.A991G:p.M331V,HLA-C:NM_002117:exon5:c.A991 | NA                               | rs1130935   | B  |
| chr6 | 31237769 | 31237769 | G         | A | exonic         | HLA-C                       | nonsynonymous SNV | _001243042:exon5:c.C989T:p.A330V,HLA-C:NM_002117:exon5:c.C989 | NA                               | rs1050105   | B  |
| chr6 | 31237771 | 31237771 | G         | A | exonic         | HLA-C                       | synonymous SNV    | _001243042:exon5:c.C987T:p.T329T,HLA-C:NM_002117:exon5:c.C987 | NA                               | rs1050106   | NA |
| chr6 | 31237773 | 31237773 | T         | C | exonic         | HLA-C                       | nonsynonymous SNV | _001243042:exon5:c.A985G:p.T329A,HLA-C:NM_002117:exon5:c.A985 | NA                               | rs1130947   | B  |
| chr6 | 31237774 | 31237774 | G         | C | exonic         | HLA-C                       | synonymous SNV    | _001243042:exon5:c.C984G:p.V328V,HLA-C:NM_002117:exon5:c.C984 | NA                               | rs41540512  | NA |
| chr6 | 31238851 | 31238851 | T         | C | exonic         | HLA-C                       | synonymous SNV    | _001243042:exon3:c.A618G:p.A206A,HLA-C:NM_002117:exon3:c.A618 | NA                               | rs2308604   | NA |
| chr6 | 31238880 | 31238880 | C         | T | exonic         | HLA-C                       | nonsynonymous SNV | _001243042:exon3:c.G589A:p.E197K,HLA-C:NM_002117:exon3:c.G589 | NA                               | rs1050357   | B  |
| chr6 | 31323945 | 31323945 | A         | C | exonic         | HLA-B                       | synonymous SNV    | HLA-B:NM_005514:exon3:c.T618G:p.A206A                         | NA                               | rs2596493   | NA |
| chr6 | 31496776 | 31496776 | T         | G | UTR5           | MCCD1                       | NA                | NA                                                            | NA                               | rs3130054   | NA |
| chr6 | 31905130 | 31905130 | G         | A | exonic         | C2                          | synonymous SNV    | 81A:p.A127A,C2:NM_001145903:exon6:c.G627A:p.A209A,C2:NM_001   | NA                               | rs1042663   | NA |
| chr6 | 32010572 | 32010572 | G         | T | exonic         | TNXB                        | nonsynonymous SNV | TNXB:NM_019105:exon39:c.C11956A:p.L3986I                      | NA                               | rs202148050 | P  |
| chr6 | 32487153 | 32487153 | C         | G | exonic         | HLA-DRB5                    | nonsynonymous SNV | HLA-DRB5:NM_002125:exon3:c.G646C:p.E216Q                      | NA                               | rs112024745 | B  |
| chr6 | 32487170 | 32487170 | G         | A | exonic         | HLA-DRB5                    | nonsynonymous SNV | HLA-DRB5:NM_002125:exon3:c.C629T:p.T210M                      | NA                               | rs1136633   | B  |
| chr6 | 32487214 | 32487214 | T         | C | exonic         | HLA-DRB5                    | synonymous SNV    | HLA-DRB5:NM_002125:exon3:c.A585G:p.R195R                      | NA                               | rs144016913 | NA |
| chr6 | 32549399 | 32549399 | C         | A | exonic         | HLA-DRB1                    | nonsynonymous SNV | HLA-DRB1:NM_002124:exon3:c.G587T:p.S196I                      | NA                               | NA          | NA |
| chr6 | 32549525 | 32549525 | C         | G | exonic         | HLA-DRB1                    | nonsynonymous SNV | HLA-DRB1:NM_002124:exon3:c.G461C:p.G154A                      | NA                               | rs111965977 | NA |
| chr6 | 32549531 | 32549531 | T         | C | exonic         | HLA-DRB1                    | nonsynonymous SNV | HLA-DRB1:NM_002124:exon3:c.A455G:p.Y152C                      | NA                               | rs112796209 | NA |
| chr6 | 32549588 | 32549588 | G         | T | exonic         | HLA-DRB1                    | stopgain SNV      | HLA-DRB1:NM_002124:exon3:c.C398A:p.S133X                      | NA                               | NA          | NA |
| chr6 | 32557422 | 32557422 | C         | T | exonic         | HLA-DRB1                    | nonsynonymous SNV | HLA-DRB1:NM_002124:exon1:c.G98A:p.R33Q                        | NA                               | rs17879746  | NA |
| chr6 | 32557461 | 32557461 | A         | G | exonic         | HLA-DRB1                    | nonsynonymous SNV | HLA-DRB1:NM_002124:exon1:c.T59C:p.M20T                        | NA                               | rs35053532  | NA |
| chr6 | 32557465 | 32557465 | G         | A | exonic         | HLA-DRB1                    | synonymous SNV    | HLA-DRB1:NM_002124:exon1:c.C55T:p.L19L                        | NA                               | rs34187469  | NA |
| chr6 | 32557487 | 32557487 | G         | A | exonic         | HLA-DRB1                    | synonymous SNV    | HLA-DRB1:NM_002124:exon1:c.C33T:p.C11C                        | NA                               | rs34396110  | NA |

|      |          |          |           |    |            |                             |                   |                                                                                             |           |             |    |
|------|----------|----------|-----------|----|------------|-----------------------------|-------------------|---------------------------------------------------------------------------------------------|-----------|-------------|----|
| chr6 | 32609873 | 32609873 | G         | C  | exonic     | HLA-DQA1                    | nonsynonymous SNV | HLA-DQA1:NM_002122:exon3:c.G456C:p.Q152H                                                    | NA        | rs707950    | B  |
| chr6 | 32610401 | 32610401 | G         | A  | exonic     | HLA-DQA1                    | nonsynonymous SNV | HLA-DQA1:NM_002122:exon4:c.G628A:p.A210T                                                    | NA        | rs9272785   | B  |
| chr6 | 32610436 | 32610436 | T         | C  | exonic     | HLA-DQA1                    | synonymous SNV    | HLA-DQA1:NM_002122:exon4:c.T663C:p.C221C                                                    | NA        | rs1048372   | NA |
| chr6 | 32610478 | 32610478 | C         | G  | exonic     | HLA-DQA1                    | synonymous SNV    | HLA-DQA1:NM_002122:exon4:c.C705G:p.G235G                                                    | NA        | rs1048414   | NA |
| chr6 | 32610481 | 32610481 | T         | C  | exonic     | HLA-DQA1                    | synonymous SNV    | HLA-DQA1:NM_002122:exon4:c.T708C:p.T236T                                                    | NA        | rs1048419   | NA |
| chr6 | 32610757 | 32610757 | A         | G  | UTR3       | HLA-DQA1                    | NA                | NA                                                                                          | NA        | rs8227      | NA |
| chr6 | 32610769 | 32610769 | A         | C  | UTR3       | HLA-DQA1                    | NA                | NA                                                                                          | NA        | rs112931520 | NA |
| chr6 | 32610806 | 32610806 | T         | C  | UTR3       | HLA-DQA1                    | NA                | NA                                                                                          | NA        | rs9272896   | NA |
| chr6 | 32610809 | 32610809 | C         | T  | UTR3       | HLA-DQA1                    | NA                | NA                                                                                          | NA        | rs9272899   | NA |
| chr6 | 32610819 | 32610819 | C         | G  | UTR3       | HLA-DQA1                    | NA                | NA                                                                                          | NA        | rs28371169  | NA |
| chr6 | 32610825 | 32610825 | A         | G  | UTR3       | HLA-DQA1                    | NA                | NA                                                                                          | NA        | rs77015062  | NA |
| chr6 | 32610836 | 32610836 | C         | T  | UTR3       | HLA-DQA1                    | NA                | NA                                                                                          | NA        | rs74417865  | NA |
| chr6 | 32627976 | 32627976 | G         | A  | UTR3       | HLA-DQB1                    | NA                | NA                                                                                          | NA        | rs1063345   | NA |
| chr6 | 32627992 | 32627992 | T         | C  | UTR3       | HLA-DQB1                    | NA                | NA                                                                                          | NA        | rs1063343   | NA |
| chr6 | 32629137 | 32629137 | T         | G  | exonic     | HLA-DQB1                    | nonsynonymous SNV | _001243961:exon4:c.A759C:p.Q253H,HLA-DQB1:NM_002123:exon4:c.                                | NA        | rs1140343   | B  |
| chr6 | 32629141 | 32629141 | C         | T  | exonic     | HLA-DQB1                    | nonsynonymous SNV | _001243961:exon4:c.G755A:p.R252H,HLA-DQB1:NM_002123:exon4:c.                                | NA        | rs1140342   | B  |
| chr6 | 32629161 | 32629161 | A         | G  | exonic     | HLA-DQB1                    | synonymous SNV    | 1_001243961:exon4:c.T735C:p.L245L,HLA-DQB1:NM_002123:exon4:c.                               | NA        | rs1130430   | NA |
| chr6 | 32629193 | 32629193 | C         | T  | exonic     | HLA-DQB1                    | nonsynonymous SNV | _001243961:exon4:c.G703A:p.V235I,HLA-DQB1:NM_002123:exon4:c.                                | NA        | rs1049163   | B  |
| chr6 | 32629847 | 32629847 | A         | G  | exonic     | HLA-DQB1                    | synonymous SNV    | 1_001243961:exon3:c.T558C:p.T186T,HLA-DQB1:NM_002123:exon3:c.                               | NA        | rs1049133   | NA |
| chr6 | 32713827 | 32713827 | C         | T  | exonic     | HLA-DQA2                    | synonymous SNV    | HLA-DQA2:NM_020056:exon3:c.C591T:p.D197D                                                    | NA        | rs1129956   | NA |
| chr6 | 32714901 | 32714901 | C         | T  | downstream | HLA-DQA2                    | NA                | NA                                                                                          | NA        | rs9276442   | NA |
| chr6 | 32714958 | 32714958 | T         | A  | downstream | HLA-DQA2                    | NA                | NA                                                                                          | NA        | rs78430708  | NA |
| chr6 | 32845561 | 32845562 | AA        | -  | intergenic | ist=17933),LOC100294145(dis | NA                | NA                                                                                          | NA        | NA          | NA |
| chr6 | 33032822 | 33032822 | G         | A  | UTR3       | HLA-DPA1                    | NA                | NA                                                                                          | NA        | rs1042926   | NA |
| chr6 | 33032831 | 33032831 | G         | A  | UTR3       | HLA-DPA1                    | NA                | NA                                                                                          | NA        | rs1042920   | NA |
| chr6 | 33032905 | 33032905 | T         | C  | UTR3       | HLA-DPA1                    | NA                | NA                                                                                          | NA        | rs1042872   | NA |
| chr6 | 33032913 | 33032913 | C         | T  | UTR3       | HLA-DPA1                    | NA                | NA                                                                                          | NA        | rs1042866   | NA |
| chr6 | 33037419 | 33037419 | G         | A  | exonic     | HLA-DPA1                    | synonymous SNV    | N115N,HLA-DPA1:NM_001242524:exon3:c.C345T:p.N115N,HLA-DPA1                                  | NA        | rs1126543   | NA |
| chr6 | 33037424 | 33037424 | T         | C  | exonic     | HLA-DPA1                    | nonsynonymous SNV | .T114A,HLA-DPA1:NM_001242524:exon3:c.A340G:p.T114A,HLA-DPA1                                 | NA        | rs1126542   | B  |
| chr6 | 33037452 | 33037452 | C         | A  | exonic     | HLA-DPA1                    | nonsynonymous SNV | .L104F,HLA-DPA1:NM_001242524:exon3:c.G312T:p.L104F,HLA-DPA1:                                | NA        | rs41548220  | B  |
| chr6 | 33037639 | 33037639 | G         | A  | exonic     | HLA-DPA1                    | nonsynonymous SNV | :p.A42V,HLA-DPA1:NM_001242524:exon3:c.C125T:p.A42V,HLA-DPA1:D=COSM328641;OCCURENCE=4(kidney | rs1126534 | B           |    |
| chr6 | 33037640 | 33037640 | C         | T  | exonic     | HLA-DPA1                    | nonsynonymous SNV | :p.A42T,HLA-DPA1:NM_001242524:exon3:c.G124A:p.A42T,HLA-DPA1:                                | NA        | rs1126533   | B  |
| chr6 | 33054331 | 33054331 | T         | C  | UTR3       | HLA-DPB1                    | NA                | NA                                                                                          | NA        | rs1126723   | NA |
| chr6 | 33054550 | 33054550 | G         | A  | UTR3       | HLA-DPB1                    | NA                | NA                                                                                          | NA        | rs931       | NA |
| chr6 | 33054552 | 33054552 | C         | G  | UTR3       | HLA-DPB1                    | NA                | NA                                                                                          | NA        | rs928       | NA |
| chr6 | 33054559 | 33054559 | T         | C  | UTR3       | HLA-DPB1                    | NA                | NA                                                                                          | NA        | rs112596157 | NA |
| chr6 | 33054659 | 33054659 | A         | G  | UTR3       | HLA-DPB1                    | NA                | NA                                                                                          | NA        | rs934       | NA |
| chr6 | 33179664 | 33179664 | A         | G  | exonic     | RING1                       | nonsynonymous SNV | RING1:NM_002931:exon6:c.A1004G:p.E335G                                                      | NA        | rs73741545  | NA |
| chr6 | 33422438 | 33422438 | A         | G  | UTR5       | ZBTB9                       | NA                | NA                                                                                          | NA        | NA          | NA |
| chr6 | 33422474 | 33422474 | A         | G  | UTR5       | ZBTB9                       | NA                | NA                                                                                          | NA        | NA          | NA |
| chr6 | 33631640 | 33631640 | C         | T  | exonic     | ITPR3                       | synonymous SNV    | ITPR3:NM_002224:exon11:c.C1131T:p.T377T                                                     | NA        | rs2229631   | NA |
| chr6 | 34204963 | 34204963 | -         | CT | UTR5       | HMGA1                       | NA                | NA                                                                                          | NA        | NA          | NA |
| chr6 | 34855748 | 34855748 | G         | C  | UTR5       | TAF11                       | NA                | NA                                                                                          | NA        | rs1051115   | NA |
| chr6 | 35090097 | 35090097 | T         | C  | exonic     | TCP11                       | synonymous SNV    | 414G:p.L138L,TCP11:NM_001261817:exon5:c.A399G:p.L133L,TCP11:N                               | NA        | rs2234044   | NA |
| chr6 | 35791166 | 35791167 | AC        | -  | UTR3       | LHFPL5                      | NA                | NA                                                                                          | NA        | rs71840857  | NA |
| chr6 | 36355372 | 36355372 | T         | C  | UTR5       | ETV7                        | NA                | NA                                                                                          | NA        | rs2234071   | NA |
| chr6 | 36996773 | 36996773 | C         | G  | UTR3       | FGD2                        | NA                | NA                                                                                          | NA        | rs708017    | NA |
| chr6 | 36996840 | 36996840 | A         | G  | UTR3       | FGD2                        | NA                | NA                                                                                          | NA        | rs708016    | NA |
| chr6 | 37185945 | 37185945 | -         | T  | UTR3       | TMEM217                     | NA                | NA                                                                                          | NA        | rs34393938  | NA |
| chr6 | 39041502 | 39041502 | A         | C  | exonic     | GLP1R                       | nonsynonymous SNV | GLP1R:NM_002062:exon7:c.A780C:p.L260F                                                       | NA        | rs1042044   | NA |
| chr6 | 39048491 | 39048491 | A         | C  | exonic     | GLP1R                       | synonymous SNV    | GLP1R:NM_002062:exon12:c.A1200C:p.I400I                                                     | NA        | rs1126476   | NA |
| chr6 | 39267139 | 39267139 | C         | G  | UTR3       | KCNK17                      | NA                | NA                                                                                          | NA        | rs143564858 | NA |
| chr6 | 41765828 | 41765828 | A         | C  | UTR3       | USP49                       | NA                | NA                                                                                          | NA        | NA          | NA |
| chr6 | 42047454 | 42047454 | T         | -  | UTR3       | TAF8                        | NA                | NA                                                                                          | NA        | NA          | NA |
| chr6 | 42048115 | 42048115 | -         | C  | UTR3       | TAF8                        | NA                | NA                                                                                          | NA        | rs5875787   | NA |
| chr6 | 42069104 | 42069104 | C         | T  | UTR3       | C6orf132                    | NA                | NA                                                                                          | NA        | rs138794174 | NA |
| chr6 | 42069534 | 42069534 | C         | -  | UTR3       | C6orf132                    | NA                | NA                                                                                          | NA        | rs34066163  | NA |
| chr6 | 42070030 | 42070030 | T         | C  | UTR3       | C6orf132                    | NA                | NA                                                                                          | NA        | rs6912553   | NA |
| chr6 | 43021977 | 43021977 | G         | -  | UTR3       | MRPL2                       | NA                | NA                                                                                          | NA        | rs34298469  | NA |
| chr6 | 43230970 | 43230970 | G         | C  | exonic     | TTBK1                       | nonsynonymous SNV | TTBK1:NM_032538:exon13:c.G1868C:p.G623A                                                     | NA        | rs3800294   | B  |
| chr6 | 43586698 | 43586698 | -         | G  | UTR3       | POLH                        | NA                | NA                                                                                          | NA        | NA          | NA |
| chr6 | 44266648 | 44266648 | -         | TT | UTR3       | AARS2                       | NA                | NA                                                                                          | NA        | NA          | NA |
| chr6 | 45517740 | 45517741 | TT        | -  | UTR3       | RUNX2                       | NA                | NA                                                                                          | NA        | NA          | NA |
| chr6 | 46672208 | 46672223 | CTCTCACAA | -  | UTR3       | PLA2G7                      | NA                | NA                                                                                          | NA        | NA          | NA |
| chr6 | 46672210 | 46672225 | CTCACACA  | -  | UTR3       | PLA2G7                      | NA                | NA                                                                                          | NA        | NA          | NA |
| chr6 | 46726915 | 46726915 | C         | A  | UTR3       | ANKRD66                     | NA                | NA                                                                                          | NA        | rs9472840   | NA |

|      |          |          |           |   |              |           |                   |                                                                                                   |                                 |             |    |
|------|----------|----------|-----------|---|--------------|-----------|-------------------|---------------------------------------------------------------------------------------------------|---------------------------------|-------------|----|
| chr6 | 46832813 | 46832813 | G         | A | exonic       | GPR116    | synonymous SNV    | 01098518:exon14:c.C1956T:p.V652V,GPR116:NM_015234:exon14:c.C                                      | NA                              | rs614826    | NA |
| chr6 | 46834685 | 46834685 | G         | A | exonic       | GPR116    | nonsynonymous SNV | 01098518:exon13:c.C1811T:p.T604M,GPR116:NM_015234:exon13:c.C                                      | NA                              | rs586024    | B  |
| chr6 | 47200361 | 47200362 | AC        | - | UTR3         | TNFRSF21  | NA                | NA                                                                                                | NA                              | NA          | NA |
| chr6 | 51481326 | 51481326 | T         | - | UTR3         | PKHD1     | NA                | NA                                                                                                | NA                              | NA          | NA |
| chr6 | 52101844 | 52101844 | T         | C | exonic       | IL17F     | nonsynonymous SNV | IL17F:NM_052872:exon3:c.A377G:p.E126G                                                             | NA                              | rs2397084   | D  |
| chr6 | 52360331 | 52360331 | G         | A | UTR3         | EFHC1     | NA                | NA                                                                                                | NA                              | rs3789771   | NA |
| chr6 | 52362416 | 52362416 | T         | A | UTR3         | TRAM2     | NA                | NA                                                                                                | NA                              | NA          | NA |
| chr6 | 52362443 | 52362443 | G         | T | UTR3         | TRAM2     | NA                | NA                                                                                                | NA                              | NA          | NA |
| chr6 | 52365335 | 52365335 | T         | G | UTR3         | TRAM2     | NA                | NA                                                                                                | NA                              | NA          | NA |
| chr6 | 52529413 | 52529413 | A         | G | ncRNA_exonic | LOC730101 | NA                | NA                                                                                                | NA                              | NA          | NA |
| chr6 | 53516173 | 53516173 | G         | T | UTR3         | KLHL31    | NA                | NA                                                                                                | NA                              | NA          | NA |
| chr6 | 53787794 | 53787794 | T         | - | UTR3         | LRRC1     | NA                | NA                                                                                                | NA                              | rs11307213  | NA |
| chr6 | 55266896 | 55266896 | T         | - | UTR3         | GFRAL     | NA                | NA                                                                                                | NA                              | rs34070544  | NA |
| chr6 | 55267231 | 55267231 | A         | - | UTR3         | GFRAL     | NA                | NA                                                                                                | NA                              | rs34277824  | NA |
| chr6 | 57086591 | 57086591 | C         | A | UTR5         | RAB23     | NA                | NA                                                                                                | NA                              | NA          | NA |
| chr6 | 57512775 | 57512775 | T         | G | UTR3         | PRIM2     | NA                | NA                                                                                                | NA                              | rs7773110   | NA |
| chr6 | 57512779 | 57512779 | G         | T | UTR3         | PRIM2     | NA                | NA                                                                                                | NA                              | rs76296076  | NA |
| chr6 | 57513126 | 57513126 | C         | G | UTR3         | PRIM2     | NA                | NA                                                                                                | NA                              | rs56375552  | NA |
| chr6 | 57513182 | 57513182 | A         | G | UTR3         | PRIM2     | NA                | NA                                                                                                | NA                              | rs1801400   | NA |
| chr6 | 70048876 | 70048876 | C         | T | exonic       | BAI3      | nonsynonymous SNV | BAI3:NM_001704:exon25:c.C3257T:p.A1086V                                                           | NA                              | NA          | P  |
| chr6 | 70992802 | 70992802 | T         | C | UTR5         | COL9A1    | NA                | NA                                                                                                | NA                              | NA          | NA |
| chr6 | 71298533 | 71298533 | A         | G | UTR3         | C6orf57   | NA                | NA                                                                                                | ID=COSN404929;OCCURENCE=1(lung) | rs13654     | NA |
| chr6 | 71666146 | 71666146 | T         | C | UTR5         | B3GAT2    | NA                | NA                                                                                                | NA                              | rs1320315   | NA |
| chr6 | 74497152 | 74497152 | G         | A | exonic       | CD109     | nonsynonymous SNV | 12A:p.V768I,CD109:NM_001159587:exon21:c.G2533A:p.V845I,CD109:NM_001159587:exon21:c.G2533A:p.V845I | NA                              | rs5023688   | B  |
| chr6 | 80411320 | 80411321 | TT        | - | UTR3         | SH3BGRL2  | NA                | NA                                                                                                | NA                              | rs35718956  | NA |
| chr6 | 81054252 | 81054252 | C         | T | UTR3         | BCKDHB    | NA                | NA                                                                                                | NA                              | rs4706117   | NA |
| chr6 | 87993555 | 87993555 | T         | - | UTR3         | GJB7      | NA                | NA                                                                                                | NA                              | NA          | NA |
| chr6 | 89874642 | 89874642 | A         | - | UTR3         | PM20D2    | NA                | NA                                                                                                | NA                              | NA          | NA |
| chr6 | 89888744 | 89888744 | C         | T | exonic       | GABRR1    | synonymous SNV    | 02042:exon10:c.G1185A:p.A395A,GABRR1:NM_001256704:exon11:c.C1185A:p.A395A                         | NA                              | rs1796743   | NA |
| chr6 | 90076245 | 90076245 | A         | - | UTR3         | RRAGD     | NA                | NA                                                                                                | NA                              | rs5878092   | NA |
| chr6 | 94486141 | 94486141 | C         | T | ncRNA_exonic | TSG1      | NA                | NA                                                                                                | NA                              | rs72922212  | NA |
| chr6 | 97592900 | 97592900 | C         | A | ncRNA_UTR3   | MMS22L    | NA                | NA                                                                                                | NA                              | NA          | NA |
| chr6 | 97592942 | 97592942 | -         | C | ncRNA_UTR3   | MMS22L    | NA                | NA                                                                                                | NA                              | NA          | NA |
| chr6 | 99956560 | 99956560 | T         | C | exonic       | USP45     | nonsynonymous SNV | USP45:NM_001080481:exon3:c.A199G:p.K67E                                                           | NA                              | rs7744845   | D  |
| chr6 | 1.06E+08 | 1.06E+08 | A         | - | UTR3         | BVES      | NA                | NA                                                                                                | NA                              | rs35412424  | NA |
| chr6 | 1.07E+08 | 1.07E+08 | T         | G | UTR3         | QRSL1     | NA                | NA                                                                                                | NA                              | NA          | NA |
| chr6 | 1.07E+08 | 1.07E+08 | -         | T | UTR5         | C6orf203  | NA                | NA                                                                                                | NA                              | rs144920055 | NA |
| chr6 | 1.07E+08 | 1.07E+08 | AA        | - | UTR3         | BEND3     | NA                | NA                                                                                                | NA                              | rs200868848 | NA |
| chr6 | 1.08E+08 | 1.08E+08 | T         | G | UTR3         | SEC63     | NA                | NA                                                                                                | NA                              | rs592989    | NA |
| chr6 | 1.08E+08 | 1.08E+08 | T         | - | UTR3         | OSTM1     | NA                | NA                                                                                                | NA                              | NA          | NA |
| chr6 | 1.09E+08 | 1.09E+08 | AC        | - | UTR3         | NR2E1     | NA                | NA                                                                                                | NA                              | rs71757629  | NA |
| chr6 | 1.1E+08  | 1.1E+08  | G         | C | UTR3         | PPIL6     | NA                | NA                                                                                                | NA                              | rs746794    | NA |
| chr6 | 1.12E+08 | 1.12E+08 | T         | A | UTR3         | LAMA4     | NA                | NA                                                                                                | NA                              | rs7758715   | NA |
| chr6 | 1.12E+08 | 1.12E+08 | C         | T | UTR3         | LAMA4     | NA                | NA                                                                                                | NA                              | rs7738331   | NA |
| chr6 | 1.17E+08 | 1.17E+08 | AAAAAA    | - | UTR3         | TSPYL1    | NA                | NA                                                                                                | NA                              | NA          | NA |
| chr6 | 1.17E+08 | 1.17E+08 | ATATATAT. | - | UTR3         | FAM26E    | NA                | NA                                                                                                | NA                              | rs72003602  | NA |
| chr6 | 1.17E+08 | 1.17E+08 | G         | A | UTR5         | RWDD1     | NA                | NA                                                                                                | NA                              | rs62622856  | NA |
| chr6 | 1.19E+08 | 1.19E+08 | A         | G | UTR5         | MCM9      | NA                | NA                                                                                                | NA                              | rs1885125   | NA |
| chr6 | 1.23E+08 | 1.23E+08 | G         | T | UTR5         | PKIB      | NA                | NA                                                                                                | NA                              | rs2288661   | NA |
| chr6 | 1.25E+08 | 1.25E+08 | G         | A | ncRNA_exonic | STL       | NA                | NA                                                                                                | NA                              | rs1761560   | NA |
| chr6 | 1.3E+08  | 1.3E+08  | C         | T | UTR3         | L3MBTL3   | NA                | NA                                                                                                | NA                              | NA          | NA |
| chr6 | 1.3E+08  | 1.3E+08  | C         | T | UTR3         | L3MBTL3   | NA                | NA                                                                                                | NA                              | NA          | NA |
| chr6 | 1.3E+08  | 1.3E+08  | T         | G | UTR3         | L3MBTL3   | NA                | NA                                                                                                | NA                              | NA          | NA |
| chr6 | 1.3E+08  | 1.3E+08  | A         | G | UTR3         | L3MBTL3   | NA                | NA                                                                                                | NA                              | NA          | NA |
| chr6 | 1.32E+08 | 1.32E+08 | A         | G | exonic       | ENPP3     | synonymous SNV    | ENPP3:NM_005021:exon8:c.A654G:p.P218P                                                             | NA                              | rs9493048   | NA |
| chr6 | 1.32E+08 | 1.32E+08 | G         | T | UTR3         | ENPP1     | NA                | NA                                                                                                | NA                              | rs11154649  | NA |
| chr6 | 1.32E+08 | 1.32E+08 | C         | T | UTR3         | ENPP1     | NA                | NA                                                                                                | NA                              | rs13216504  | NA |
| chr6 | 1.32E+08 | 1.32E+08 | TT        | - | UTR3         | ENPP1     | NA                | NA                                                                                                | NA                              | NA          | NA |
| chr6 | 1.32E+08 | 1.32E+08 | C         | A | UTR3         | ENPP1     | NA                | NA                                                                                                | NA                              | NA          | NA |
| chr6 | 1.33E+08 | 1.33E+08 | A         | G | ncRNA_exonic | VNN3      | NA                | NA                                                                                                | NA                              | rs2294759   | NA |
| chr6 | 1.34E+08 | 1.34E+08 | TGTA      | - | UTR3         | SLC2A12   | NA                | NA                                                                                                | NA                              | rs146405495 | NA |
| chr6 | 1.35E+08 | 1.35E+08 | G         | T | UTR3         | HBS1L     | NA                | NA                                                                                                | NA                              | rs77051210  | NA |
| chr6 | 1.35E+08 | 1.35E+08 | C         | T | UTR3         | HBS1L     | NA                | NA                                                                                                | NA                              | NA          | NA |
| chr6 | 1.35E+08 | 1.35E+08 | G         | T | exonic       | HBS1L     | nonsynonymous SNV | 01145158:exon15:c.C1687A:p.Q563K,HBS1L:NM_006620:exon16:c.C1687A:p.Q563K                          | NA                              | NA          | D  |
| chr6 | 1.37E+08 | 1.37E+08 | A         | - | UTR3         | PDE7B     | NA                | NA                                                                                                | NA                              | NA          | NA |
| chr6 | 1.38E+08 | 1.38E+08 | A         | - | UTR3         | TNFAIP3   | NA                | NA                                                                                                | NA                              | NA          | NA |



|      |          |          |          |   |              |             |                   |                                                                |    |             |    |
|------|----------|----------|----------|---|--------------|-------------|-------------------|----------------------------------------------------------------|----|-------------|----|
| chr6 | 1.39E+08 | 1.39E+08 | T        | C | UTR3         | NHSL1       | NA                | NA                                                             | NA | NA          | NA |
| chr6 | 1.39E+08 | 1.39E+08 | T        | G | UTR3         | NHSL1       | NA                | NA                                                             | NA | NA          | NA |
| chr6 | 1.39E+08 | 1.39E+08 | C        | T | exonic       | CCDC28A     | synonymous SNV    | CCDC28A:NM_015439:exon1:c.C126T:p.S42S                         | NA | rs11154999  | NA |
| chr6 | 1.39E+08 | 1.39E+08 | TT       | - | UTR3         | HECA        | NA                | NA                                                             | NA | NA          | NA |
| chr6 | 1.43E+08 | 1.43E+08 | A        | C | UTR3         | VTA1        | NA                | NA                                                             | NA | rs225711    | NA |
| chr6 | 1.44E+08 | 1.44E+08 | C        | G | UTR3         | ADAT2       | NA                | NA                                                             | NA | rs9496617   | NA |
| chr6 | 1.44E+08 | 1.44E+08 | A        | G | UTR3         | ADAT2       | NA                | NA                                                             | NA | rs9496619   | NA |
| chr6 | 1.44E+08 | 1.44E+08 | A        | T | UTR3         | PEX3        | NA                | NA                                                             | NA | rs223234    | NA |
| chr6 | 1.44E+08 | 1.44E+08 | A        | - | UTR3         | FUCA2       | NA                | NA                                                             | NA | rs67844126  | NA |
| chr6 | 1.44E+08 | 1.44E+08 | TTT      | - | UTR3         | PHACTR2     | NA                | NA                                                             | NA | NA          | NA |
| chr6 | 1.45E+08 | 1.45E+08 | G        | T | UTR3         | STX11       | NA                | NA                                                             | NA | NA          | NA |
| chr6 | 1.46E+08 | 1.46E+08 | G        | A | ncRNA_UTR5   | EPM2A       | NA                | NA                                                             | NA | rs2072911   | NA |
| chr6 | 1.5E+08  | 1.5E+08  | C        | T | UTR3         | PPIL4       | NA                | NA                                                             | NA | NA          | NA |
| chr6 | 1.5E+08  | 1.5E+08  | T        | C | UTR5         | LATS1       | NA                | NA                                                             | NA | rs9767113   | NA |
| chr6 | 1.5E+08  | 1.5E+08  | C        | G | UTR5         | LATS1       | NA                | NA                                                             | NA | rs2297932   | NA |
| chr6 | 1.5E+08  | 1.5E+08  | A        | - | UTR3         | NUP43       | NA                | NA                                                             | NA | rs11305807  | NA |
| chr6 | 1.5E+08  | 1.5E+08  | T        | C | UTR3         | ULBP1       | NA                | NA                                                             | NA | rs12110668  | NA |
| chr6 | 1.51E+08 | 1.51E+08 | A        | G | UTR3         | MTHFD1L     | NA                | NA                                                             | NA | rs7646      | NA |
| chr6 | 1.51E+08 | 1.51E+08 | G        | A | UTR3         | MTHFD1L     | NA                | NA                                                             | NA | rs7543      | NA |
| chr6 | 1.51E+08 | 1.51E+08 | A        | G | UTR3         | MTHFD1L     | NA                | NA                                                             | NA | rs1047665   | NA |
| chr6 | 1.52E+08 | 1.52E+08 | TT       | - | UTR3         | AKAP12      | NA                | NA                                                             | NA | NA          | NA |
| chr6 | 1.52E+08 | 1.52E+08 | AA       | - | UTR3         | ESR1        | NA                | NA                                                             | NA | NA          | NA |
| chr6 | 1.53E+08 | 1.53E+08 | C        | A | exonic       | SYNE1       | nonsynonymous SNV | 3071:exon76:c.G12566T:p.W4189L,SYNE1:NM_182961:exon77:c.G127   | NA | NA          | D  |
| chr6 | 1.53E+08 | 1.53E+08 | G        | A | exonic       | SYNE1       | nonsynonymous SNV | 133071:exon54:c.C8405T:p.A2802V,SYNE1:NM_182961:exon54:c.C838  | NA | rs214950    | B  |
| chr6 | 1.53E+08 | 1.53E+08 | G        | A | UTR5         | SYNE1       | NA                | NA                                                             | NA | rs9478345   | NA |
| chr6 | 1.53E+08 | 1.53E+08 | T        | C | UTR5         | FBXO5       | NA                | NA                                                             | NA | NA          | NA |
| chr6 | 1.53E+08 | 1.53E+08 | G        | T | UTR3         | MTRF1L      | NA                | NA                                                             | NA | rs111229801 | NA |
| chr6 | 1.53E+08 | 1.53E+08 | C        | T | exonic       | MTRF1L      | nonsynonymous SNV | I_001114184:exon1:c.G227A:p.R76Q,MTRF1L:NM_019041:exon1:c.G2   | NA | rs3818123   | B  |
| chr6 | 1.54E+08 | 1.54E+08 | A        | G | exonic       | OPRM1       | synonymous SNV    | OPRM1:NM_001008505:exon4:c.A1323G:p.G441G                      | NA | rs675026    | NA |
| chr6 | 1.54E+08 | 1.54E+08 | C        | T | exonic       | OPRM1       | synonymous SNV    | OPRM1:NM_001008505:exon4:c.C1333T:p.L445L                      | NA | rs562859    | NA |
| chr6 | 1.55E+08 | 1.55E+08 | G        | A | exonic       | TIAM2       | synonymous SNV    | TIAM2:NM_012454:exon7:c.G2034A:p.Q678Q                         | NA | rs1032141   | NA |
| chr6 | 1.56E+08 | 1.56E+08 | AAA      | - | UTR3         | TFB1M,TIAM2 | NA                | NA                                                             | NA | NA          | NA |
| chr6 | 1.56E+08 | 1.56E+08 | A        | G | upstream     | TFB1M       | NA                | NA                                                             | NA | rs1334688   | NA |
| chr6 | 1.58E+08 | 1.58E+08 | A        | - | UTR3         | ZDHHC14     | NA                | NA                                                             | NA | NA          | NA |
| chr6 | 1.58E+08 | 1.58E+08 | A        | T | UTR3         | ZDHHC14     | NA                | NA                                                             | NA | NA          | NA |
| chr6 | 1.59E+08 | 1.59E+08 | G        | A | UTR3         | GTF2H5      | NA                | NA                                                             | NA | rs9457163   | NA |
| chr6 | 1.59E+08 | 1.59E+08 | TTT      | - | UTR3         | TULP4       | NA                | NA                                                             | NA | NA          | NA |
| chr6 | 1.59E+08 | 1.59E+08 | C        | T | exonic       | SYTL3       | synonymous SNV    | 1009991:exon14:c.C1173T:p.L391L,SYTL3:NM_001242394:exon15:c.C: | NA | rs117895837 | NA |
| chr6 | 1.59E+08 | 1.59E+08 | A        | - | UTR3         | EZR         | NA                | NA                                                             | NA | NA          | NA |
| chr6 | 1.59E+08 | 1.59E+08 | A        | C | UTR3         | EZR         | NA                | NA                                                             | NA | NA          | NA |
| chr6 | 1.6E+08  | 1.6E+08  | T        | C | exonic       | FNDC1       | synonymous SNV    | FNDC1:NM_032532:exon11:c.T3270C:p.D1090D                       | NA | NA          | NA |
| chr6 | 1.61E+08 | 1.61E+08 | TGTG     | - | UTR3         | IGF2R       | NA                | NA                                                             | NA | NA          | NA |
| chr6 | 1.61E+08 | 1.61E+08 | C        | T | exonic       | SLC22A2     | synonymous SNV    | SLC22A2:NM_003058:exon10:c.G1506A:p.V502V                      | NA | rs316003    | NA |
| chr6 | 1.64E+08 | 1.64E+08 | G        | C | UTR3         | QKI         | NA                | NA                                                             | NA | NA          | NA |
| chr6 | 1.67E+08 | 1.67E+08 | T        | C | UTR5         | SFT2D1      | NA                | NA                                                             | NA | rs10862     | NA |
| chr6 | 1.67E+08 | 1.67E+08 | A        | C | UTR5         | SFT2D1      | NA                | NA                                                             | NA | rs11168     | NA |
| chr6 | 1.68E+08 | 1.68E+08 | G        | C | UTR5         | CCR6        | NA                | NA                                                             | NA | rs1012656   | NA |
| chr6 | 1.68E+08 | 1.68E+08 | A        | C | ncRNA_exonic | MLLT4-AS1   | NA                | NA                                                             | NA | NA          | NA |
| chr6 | 1.68E+08 | 1.68E+08 | A        | C | ncRNA_exonic | MLLT4-AS1   | NA                | NA                                                             | NA | NA          | NA |
| chr6 | 1.68E+08 | 1.68E+08 | A        | C | ncRNA_exonic | MLLT4-AS1   | NA                | NA                                                             | NA | NA          | NA |
| chr6 | 1.68E+08 | 1.68E+08 | GTGTGTGT | - | UTR3         | MLLT4       | NA                | NA                                                             | NA | NA          | NA |
| chr6 | 1.68E+08 | 1.68E+08 | G        | T | exonic       | HGC6.3      | synonymous SNV    | HGC6.3:NM_001129895:exon1:c.C282A:p.P94P                       | NA | NA          | NA |
| chr6 | 1.68E+08 | 1.68E+08 | G        | C | exonic       | FRMD1       | nonsynonymous SNV | 1122841:exon10:c.C1162G:p.Q388E,FRMD1:NM_024919:exon10:c.C1    | NA | rs1548349   | B  |
| chr6 | 1.68E+08 | 1.68E+08 | G        | A | exonic       | FRMD1       | synonymous SNV    | FRMD1:NM_024919:exon1:c.C171T:p.L57L                           | NA | rs34054991  | NA |
| chr6 | 1.7E+08  | 1.7E+08  | C        | T | exonic       | THBS2       | synonymous SNV    | THBS2:NM_003247:exon6:c.G777A:p.S259S                          | NA | rs61730651  | NA |
| chr7 | 537542   | 537542   | G        | A | UTR3         | PDGFA       | NA                | NA                                                             | NA | NA          | NA |
| chr7 | 537560   | 537560   | T        | A | UTR3         | PDGFA       | NA                | NA                                                             | NA | NA          | NA |
| chr7 | 537690   | 537690   | T        | G | UTR3         | PDGFA       | NA                | NA                                                             | NA | NA          | NA |
| chr7 | 1478615  | 1478615  | T        | G | exonic       | MICALL2     | synonymous SNV    | MICALL2:NM_182924:exon10:c.A1983C:p.P661P                      | NA | NA          | NA |
| chr7 | 1787520  | 1787520  | A        | - | UTR3         | ELFN1       | NA                | NA                                                             | NA | rs5881906   | NA |
| chr7 | 2567705  | 2567705  | A        | G | UTR3         | LFNG        | NA                | NA                                                             | NA | NA          | NA |
| chr7 | 4809075  | 4809075  | T        | - | UTR3         | FOKK1       | NA                | NA                                                             | NA | NA          | NA |
| chr7 | 4810496  | 4810501  | GTGTGT   | - | UTR3         | FOKK1       | NA                | NA                                                             | NA | NA          | NA |
| chr7 | 4841318  | 4841318  | G        | A | exonic       | RADIL       | synonymous SNV    | RADIL:NM_018059:exon12:c.C2808T:p.N936N                        | NA | rs6945581   | NA |
| chr7 | 5013688  | 5013688  | A        | G | ncRNA_exonic | RNF216P1    | NA                | NA                                                             | NA | rs6978215   | NA |
| chr7 | 5346838  | 5346838  | -        | T | UTR3         | TNRC18      | NA                | NA                                                             | NA | NA          | NA |

|      |          |          |          |         |              |              |                         |                                                                                                    |                                     |             |    |
|------|----------|----------|----------|---------|--------------|--------------|-------------------------|----------------------------------------------------------------------------------------------------|-------------------------------------|-------------|----|
| chr7 | 5352665  | 5352665  | -        | GAGGAG  | exonic       | TNRC18       | nonframeshift insertion | IRC18:NM_001080495:exon27:c.7857_7858insCTCCTC:p.S2619delinsS                                      | NA                                  | NA          | NA |
| chr7 | 5660802  | 5660802  | -        | ATCTTTT | UTR3         | RNF216       | NA                      | NA                                                                                                 | NA                                  | NA          | NA |
| chr7 | 6448941  | 6448941  | T        | G       | UTR3         | DAGLB        | NA                      | NA                                                                                                 | NA                                  | NA          | NA |
| chr7 | 9673930  | 9673930  | G        | -       | ncRNA_exonic | PER4         | NA                      | NA                                                                                                 | NA                                  | rs5882228   | NA |
| chr7 | 9675063  | 9675063  | C        | A       | ncRNA_exonic | PER4         | NA                      | NA                                                                                                 | NA                                  | NA          | NA |
| chr7 | 11411963 | 11411963 | -        | TT      | UTR3         | THSD7A       | NA                      | NA                                                                                                 | NA                                  | NA          | NA |
| chr7 | 12370657 | 12370657 | A        | G       | UTR3         | VWDE         | NA                      | NA                                                                                                 | NA                                  | rs2253353   | NA |
| chr7 | 12370794 | 12370794 | T        | C       | UTR3         | VWDE         | NA                      | NA                                                                                                 | NA                                  | rs1059002   | NA |
| chr7 | 12730250 | 12730250 | -        | T       | UTR3         | ARL4A        | NA                      | NA                                                                                                 | NA                                  | NA          | NA |
| chr7 | 15725798 | 15725800 | TGG      | -       | exonic       | MEOX2        | nonframeshift deletion  | MEOX2:NM_005924:exon1:c.228_230del:p.76_77del                                                      | rs150907;OCCURENCE=1(stomach),1(oes | rs113582077 | NA |
| chr7 | 15726129 | 15726129 | A        | C       | UTR5         | MEOX2        | NA                      | NA                                                                                                 | NA                                  | rs11975534  | NA |
| chr7 | 16130175 | 16130175 | A        | -       | UTR3         | ISPD         | NA                      | NA                                                                                                 | NA                                  | NA          | NA |
| chr7 | 16666759 | 16666759 | G        | C       | exonic       | ANKMY2       | synonymous SNV          | ANKMY2:NM_020319:exon3:c.C177G:p.L59L                                                              | NA                                  | rs11531477  | NA |
| chr7 | 20180473 | 20180473 | C        | G       | UTR3         | MACC1        | NA                      | NA                                                                                                 | NA                                  | NA          | NA |
| chr7 | 21599233 | 21599233 | C        | T       | exonic       | DNAH11       | synonymous SNV          | DNAH11:NM_001277115:exon4:c.C705T:p.N235N                                                          | NA                                  | rs10950854  | NA |
| chr7 | 22158518 | 22158518 | G        | C       | UTR3         | RAPGEF5      | NA                      | NA                                                                                                 | NA                                  | NA          | NA |
| chr7 | 22158526 | 22158526 | A        | C       | UTR3         | RAPGEF5      | NA                      | NA                                                                                                 | NA                                  | rs111375567 | NA |
| chr7 | 22160845 | 22160845 | A        | -       | UTR3         | RAPGEF5      | NA                      | NA                                                                                                 | NA                                  | rs10716365  | NA |
| chr7 | 23531029 | 23531029 | -        | A       | ncRNA_exonic | RPS2P32      | NA                      | NA                                                                                                 | NA                                  | NA          | NA |
| chr7 | 23545140 | 23545140 | G        | A       | UTR3         | TRA2A        | NA                      | NA                                                                                                 | NA                                  | NA          | NA |
| chr7 | 23545142 | 23545142 | G        | A       | UTR3         | TRA2A        | NA                      | NA                                                                                                 | NA                                  | NA          | NA |
| chr7 | 23545143 | 23545143 | G        | A       | UTR3         | TRA2A        | NA                      | NA                                                                                                 | NA                                  | NA          | NA |
| chr7 | 23749888 | 23749888 | A        | G       | UTR5         | STK31        | NA                      | NA                                                                                                 | NA                                  | NA          | NA |
| chr7 | 25219341 | 25219341 | C        | T       | UTR5         | C7orf31      | NA                      | NA                                                                                                 | NA                                  | rs117565579 | NA |
| chr7 | 27147452 | 27147452 | A        | -       | UTR3         | HOXA3        | NA                      | NA                                                                                                 | NA                                  | rs59078276  | NA |
| chr7 | 27224599 | 27224599 | T        | G       | exonic       | HOXA11       | nonsynonymous SNV       | HOXA11:NM_005523:exon1:c.A165C:p.Q55H                                                              | NA                                  | NA          | D  |
| chr7 | 28860743 | 28860743 | -        | TGTG    | UTR3         | CREB5        | NA                      | NA                                                                                                 | NA                                  | NA          | NA |
| chr7 | 29688566 | 29688566 | -        | AAA     | ncRNA_exonic | LOC646762    | NA                      | NA                                                                                                 | NA                                  | NA          | NA |
| chr7 | 30796038 | 30796038 | A        | T       | ncRNA_UTR3   | INMT         | NA                      | NA                                                                                                 | NA                                  | rs10258337  | NA |
| chr7 | 32525555 | 32525557 | AAA      | -       | UTR3         | LSM5         | NA                      | NA                                                                                                 | NA                                  | NA          | NA |
| chr7 | 32525561 | 32525561 | A        | C       | UTR3         | LSM5         | NA                      | NA                                                                                                 | NA                                  | rs7784803   | NA |
| chr7 | 32525564 | 32525564 | A        | C       | UTR3         | LSM5         | NA                      | NA                                                                                                 | NA                                  | NA          | NA |
| chr7 | 32613020 | 32613020 | A        | G       | exonic       | AVL9         | synonymous SNV          | AVL9:NM_015060:exon12:c.A1560G:p.T520T                                                             | rs150265;OCCURENCE=1(stomach)       | rs1993050   | NA |
| chr7 | 33045704 | 33045704 | T        | -       | UTR3         | FKBP9        | NA                      | NA                                                                                                 | NA                                  | NA          | NA |
| chr7 | 36447349 | 36447349 | -        | CTT     | exonic       | ANLN         | nonframeshift insertion | ANLN:NM_018685:exon5:c.880_881insCTT:p.T294delinsTS                                                | NA                                  | rs143969069 | NA |
| chr7 | 37991430 | 37991430 | T        | -       | UTR3         | EPDR1        | NA                      | NA                                                                                                 | NA                                  | rs5883621   | NA |
| chr7 | 41728701 | 41728702 | TG       | -       | UTR3         | INHBA        | NA                      | NA                                                                                                 | NA                                  | NA          | NA |
| chr7 | 44836268 | 44836268 | C        | G       | UTR5         | PPIA         | NA                      | NA                                                                                                 | NA                                  | rs8177826   | NA |
| chr7 | 44868379 | 44868379 | A        | G       | UTR3         | H2AFV        | NA                      | NA                                                                                                 | NA                                  | rs1058056   | NA |
| chr7 | 44868971 | 44868971 | G        | A       | UTR3         | H2AFV        | NA                      | NA                                                                                                 | NA                                  | rs66566005  | NA |
| chr7 | 44919001 | 44919002 | TT       | -       | UTR3         | PURB         | NA                      | NA                                                                                                 | NA                                  | rs71710319  | NA |
| chr7 | 45123577 | 45123577 | C        | T       | exonic       | NACAD        | synonymous SNV          | NACAD:NM_001146334:exon2:c.G2202A:p.S734S                                                          | NA                                  | NA          | NA |
| chr7 | 45123660 | 45123660 | A        | G       | exonic       | NACAD        | nonsynonymous SNV       | NACAD:NM_001146334:exon2:c.T2119C:p.S707P                                                          | NA                                  | rs202009438 | NA |
| chr7 | 48965141 | 48965141 | A        | G       | ncRNA_exonic | CDC14C       | NA                      | NA                                                                                                 | NA                                  | rs28454487  | NA |
| chr7 | 50199066 | 50199066 | G        | C       | downstream   | C7orf72      | NA                      | NA                                                                                                 | NA                                  | rs6966228   | NA |
| chr7 | 50628740 | 50628743 | CTCT     | -       | UTR5         | DDC          | NA                      | NA                                                                                                 | NA                                  | rs3837091   | NA |
| chr7 | 56079222 | 56079222 | A        | -       | UTR3         | PSPH         | NA                      | NA                                                                                                 | NA                                  | rs34727399  | NA |
| chr7 | 56147931 | 56147931 | C        | A       | UTR3         | SUMF2        | NA                      | NA                                                                                                 | NA                                  | NA          | NA |
| chr7 | 64254822 | 64254832 | 5CTGCAGG | -       | UTR5         | ZNF138       | NA                      | NA                                                                                                 | NA                                  | rs112918223 | NA |
| chr7 | 64436819 | 64436819 | -        | A       | UTR3         | ZNF117       | NA                      | NA                                                                                                 | NA                                  | NA          | NA |
| chr7 | 65159983 | 65159983 | A        | G       | ncRNA_exonic | INTS4L2      | NA                      | NA                                                                                                 | NA                                  | rs147104756 | NA |
| chr7 | 65228273 | 65228273 | G        | A       | ncRNA_exonic | CCT6P1       | NA                      | NA                                                                                                 | NA                                  | rs1131689   | NA |
| chr7 | 70257602 | 70257602 | T        | -       | UTR3         | AUTS2        | NA                      | NA                                                                                                 | NA                                  | rs71777072  | NA |
| chr7 | 72304471 | 72304471 | T        | -       | ncRNA_exonic | SBDSP1       | NA                      | NA                                                                                                 | NA                                  | rs5884895   | NA |
| chr7 | 73112466 | 73112466 | G        | A       | UTR3         | WBSCR22      | NA                      | NA                                                                                                 | NA                                  | NA          | NA |
| chr7 | 73818404 | 73818404 | C        | T       | UTR3         | CLIP2        | NA                      | NA                                                                                                 | NA                                  | rs2240436   | NA |
| chr7 | 76669028 | 76669028 | A        | C       | ncRNA_exonic | LOC100132832 | NA                      | NA                                                                                                 | NA                                  | NA          | NA |
| chr7 | 76669044 | 76669044 | G        | C       | ncRNA_exonic | LOC100132832 | NA                      | NA                                                                                                 | NA                                  | rs1063947   | NA |
| chr7 | 76669060 | 76669060 | G        | A       | ncRNA_exonic | LOC100132832 | NA                      | NA                                                                                                 | NA                                  | NA          | NA |
| chr7 | 76669085 | 76669085 | T        | A       | ncRNA_exonic | LOC100132832 | NA                      | NA                                                                                                 | ID=COSN405014;OCCURENCE=1(lung)     | NA          | NA |
| chr7 | 76991935 | 76991935 | C        | T       | exonic       | GSAP         | nonsynonymous SNV       | GSAP:NM_017439:exon13:c.G914A:p.G305E                                                              | NA                                  | rs1527263   | B  |
| chr7 | 77408761 | 77408762 | AT       | -       | UTR3         | RSBN1L       | NA                      | NA                                                                                                 | NA                                  | rs10569815  | NA |
| chr7 | 82784471 | 82784471 | A        | G       | exonic       | PCLO         | nonsynonymous SNV       | 1_014510:exon2:c.T1486C:p.S496P,PCLO:NM_033026:exon2:c.T1486C:46480,COSM246482;OCCURENCE=2(kidney) | rs199515717                         | NA          | NA |
| chr7 | 83278198 | 83278198 | G        | A       | UTR5         | SEMA3E       | NA                      | NA                                                                                                 | NA                                  | rs200070960 | NA |
| chr7 | 84625293 | 84625293 | T        | -       | UTR3         | SEMA3D       | NA                      | NA                                                                                                 | NA                                  | NA          | NA |
| chr7 | 89863860 | 89863860 | -        | T       | UTR3         | STEAP2       | NA                      | NA                                                                                                 | NA                                  | NA          | NA |

|      |          |          |         |      |              |              |                        |                                                                  |    |             |    |
|------|----------|----------|---------|------|--------------|--------------|------------------------|------------------------------------------------------------------|----|-------------|----|
| chr7 | 91742142 | 91742142 | -       | A    | UTR3         | CYP51A1      | NA                     | NA                                                               | NA | NA          | NA |
| chr7 | 91829671 | 91829671 | -       | T    | UTR3         | KRIT1        | NA                     | NA                                                               | NA | NA          | NA |
| chr7 | 92088521 | 92088521 | -       | AG   | UTR3         | GATAD1       | NA                     | NA                                                               | NA | rs112382994 | NA |
| chr7 | 92775019 | 92775019 | T       | C    | UTR5         | SAMD9L       | NA                     | NA                                                               | NA | rs28662     | NA |
| chr7 | 94030899 | 94030899 | T       | C    | exonic       | COL1A2       | synonymous SNV         | COL1A2:NM_000089:exon6:c.T246C:p.D82D                            | NA | rs1800222   | NA |
| chr7 | 94989256 | 94989256 | T       | -    | UTR3         | PON3         | NA                     | NA                                                               | NA | NA          | NA |
| chr7 | 95025600 | 95025600 | G       | A    | exonic       | PON3         | synonymous SNV         | PON3:NM_000940:exon1:c.C63T:p.F21F                               | NA | rs13226149  | NA |
| chr7 | 97837250 | 97837251 | AT      | -    | UTR3         | LMTK2        | NA                     | NA                                                               | NA | rs140647225 | NA |
| chr7 | 98445139 | 98445139 | G       | C    | UTR3         | TMEM130      | NA                     | NA                                                               | NA | rs147506687 | NA |
| chr7 | 98792835 | 98792835 | G       | A    | exonic       | KPNA7        | synonymous SNV         | KPNA7:NM_001145715:exon4:c.C411T:p.A137A                         | NA | rs61751722  | NA |
| chr7 | 99752122 | 99752122 | A       | -    | UTR3         | C7orf43      | NA                     | NA                                                               | NA | NA          | NA |
| chr7 | 1E+08    | 1E+08    | T       | G    | exonic       | MEPCE        | nonsynonymous SNV      | MEPCE:NM_019606:exon1:c.T518G:p.V173G                            | NA | NA          | D  |
| chr7 | 1E+08    | 1E+08    | A       | G    | UTR3         | NYAP1        | NA                     | NA                                                               | NA | NA          | NA |
| chr7 | 1E+08    | 1E+08    | C       | G    | UTR3         | NYAP1        | NA                     | NA                                                               | NA | NA          | NA |
| chr7 | 1E+08    | 1E+08    | T       | G    | UTR3         | NYAP1        | NA                     | NA                                                               | NA | NA          | NA |
| chr7 | 1E+08    | 1E+08    | T       | G    | UTR3         | NYAP1        | NA                     | NA                                                               | NA | NA          | NA |
| chr7 | 1E+08    | 1E+08    | TT      | -    | UTR3         | AGFG2        | NA                     | NA                                                               | NA | NA          | NA |
| chr7 | 1E+08    | 1E+08    | T       | G    | UTR3         | GIGYF1       | NA                     | NA                                                               | NA | NA          | NA |
| chr7 | 1E+08    | 1E+08    | A       | C    | UTR3         | GIGYF1       | NA                     | NA                                                               | NA | NA          | NA |
| chr7 | 1E+08    | 1E+08    | AA      | -    | UTR3         | GIGYF1       | NA                     | NA                                                               | NA | NA          | NA |
| chr7 | 1E+08    | 1E+08    | T       | -    | UTR3         | GIGYF1       | NA                     | NA                                                               | NA | rs146231586 | NA |
| chr7 | 1E+08    | 1E+08    | T       | C    | exonic       | ZAN          | unknown                | UNKNOWN                                                          | NA | NA          | NA |
| chr7 | 1E+08    | 1E+08    | T       | C    | exonic       | ZAN          | unknown                | UNKNOWN                                                          | NA | rs200387712 | NA |
| chr7 | 1E+08    | 1E+08    | T       | C    | exonic       | ZAN          | unknown                | UNKNOWN                                                          | NA | rs201073731 | NA |
| chr7 | 1E+08    | 1E+08    | C       | A    | exonic       | ZAN          | unknown                | UNKNOWN                                                          | NA | rs2734880   | NA |
| chr7 | 1E+08    | 1E+08    | C       | T    | exonic       | ZAN          | unknown                | UNKNOWN                                                          | NA | rs314298    | NA |
| chr7 | 1E+08    | 1E+08    | -       | G    | exonic       | ZAN          | unknown                | UNKNOWN                                                          | NA | rs148800656 | NA |
| chr7 | 1E+08    | 1E+08    | T       | C    | exonic       | ZAN          | unknown                | UNKNOWN                                                          | NA | rs531503    | NA |
| chr7 | 1E+08    | 1E+08    | -       | G    | UTR5         | SRRT         | NA                     | NA                                                               | NA | rs11462700  | NA |
| chr7 | 1.01E+08 | 1.01E+08 | C       | A    | exonic       | MUC12        | nonsynonymous SNV      | MUC12:NM_001164462:exon2:c.C5574A:p.D1858E                       | NA | rs200702634 | NA |
| chr7 | 1.01E+08 | 1.01E+08 | G       | A    | exonic       | MUC12        | nonsynonymous SNV      | MUC12:NM_001164462:exon2:c.G5575A:p.A1859T                       | NA | rs201905745 | NA |
| chr7 | 1.01E+08 | 1.01E+08 | C       | T    | exonic       | MUC12        | nonsynonymous SNV      | MUC12:NM_001164462:exon2:c.C7787T:p.T2596I                       | NA | NA          | NA |
| chr7 | 1.01E+08 | 1.01E+08 | C       | G    | exonic       | MUC12        | nonsynonymous SNV      | MUC12:NM_001164462:exon2:c.C8078G:p.P2693R                       | NA | NA          | NA |
| chr7 | 1.01E+08 | 1.01E+08 | G       | A    | exonic       | MUC12        | nonsynonymous SNV      | MUC12:NM_001164462:exon2:c.G11150A:p.R3717H                      | NA | rs200935425 | NA |
| chr7 | 1.01E+08 | 1.01E+08 | A       | T    | exonic       | MUC12        | nonsynonymous SNV      | MUC12:NM_001164462:exon2:c.A12560T:p.K4187I                      | NA | rs202045957 | NA |
| chr7 | 1.01E+08 | 1.01E+08 | T       | C    | UTR3         | MUC17        | NA                     | NA                                                               | NA | rs4729655   | NA |
| chr7 | 1.01E+08 | 1.01E+08 | T       | A    | UTR3         | MUC17        | NA                     | NA                                                               | NA | rs4729656   | NA |
| chr7 | 1.01E+08 | 1.01E+08 | G       | A    | exonic       | COL26A1      | unknown                | UNKNOWN                                                          | NA | rs17393069  | NA |
| chr7 | 1.02E+08 | 1.02E+08 | A       | -    | UTR3         | ORAI2        | NA                     | NA                                                               | NA | rs11303681  | NA |
| chr7 | 1.02E+08 | 1.02E+08 | A       | -    | UTR3         | ORAI2        | NA                     | NA                                                               | NA | NA          | NA |
| chr7 | 1.02E+08 | 1.02E+08 | C       | A    | UTR3         | RASA4        | NA                     | NA                                                               | NA | rs11547188  | NA |
| chr7 | 1.02E+08 | 1.02E+08 | T       | C    | exonic       | RASA4,RASA4B | nonsynonymous SNV      | 2G:p.E141G,RASA4B:NM_001277335:exon5:c.A422G:p.E141G,RASA4:I     | NA | rs11547189  | D  |
| chr7 | 1.02E+08 | 1.02E+08 | A       | G    | exonic       | RASA4,RASA4B | synonymous SNV         | 3C:p.D113D,RASA4B:NM_001277335:exon5:c.C339C:p.D113D,RASA4:I     | NA | rs11547191  | NA |
| chr7 | 1.02E+08 | 1.02E+08 | C       | G    | UTR5         | POLR2J2      | NA                     | NA                                                               | NA | rs71559483  | NA |
| chr7 | 1.03E+08 | 1.03E+08 | G       | -    | ncRNA_exonic | DPY19L2P2    | NA                     | NA                                                               | NA | NA          | NA |
| chr7 | 1.03E+08 | 1.03E+08 | A       | G    | exonic       | RELN         | synonymous SNV         | J05045:exon50:c.T7887C:p.P2629P,RELN:NM_173054:exon50:c.T7887    | NA | rs56345626  | NA |
| chr7 | 1.07E+08 | 1.07E+08 | A       | C    | UTR3         | BCAP29       | NA                     | NA                                                               | NA | rs9691194   | NA |
| chr7 | 1.08E+08 | 1.08E+08 | A       | G    | UTR5         | LAMB1        | NA                     | NA                                                               | NA | rs2070917   | NA |
| chr7 | 1.15E+08 | 1.15E+08 | C       | T    | UTR3         | MDFIC        | NA                     | NA                                                               | NA | NA          | NA |
| chr7 | 1.16E+08 | 1.16E+08 | AAAAAAG | -    | UTR3         | CAV2         | NA                     | NA                                                               | NA | rs201863771 | NA |
| chr7 | 1.16E+08 | 1.16E+08 | A       | -    | UTR3         | CAV1         | NA                     | NA                                                               | NA | NA          | NA |
| chr7 | 1.17E+08 | 1.17E+08 | C       | T    | exonic       | CFTR         | nonsynonymous SNV      | CFTR:NM_000492:exon10:c.C1265T:p.S422F                           | NA | rs201880593 | B  |
| chr7 | 1.17E+08 | 1.17E+08 | A       | G    | exonic       | CFTR         | nonsynonymous SNV      | CFTR:NM_000492:exon10:c.A1312G:p.T438A                           | NA | rs201434579 | B  |
| chr7 | 1.17E+08 | 1.17E+08 | G       | T    | exonic       | CFTR         | synonymous SNV         | CFTR:NM_000492:exon10:c.G1365T:p.A455A                           | NA | rs79074685  | NA |
| chr7 | 1.17E+08 | 1.17E+08 | TCT     | -    | exonic       | CFTR         | nonframeshift deletion | CFTR:NM_000492:exon11:c.1520_1522del:p.507_508del                | NA | rs199826652 | NA |
| chr7 | 1.17E+08 | 1.17E+08 | G       | A    | exonic       | CFTR         | synonymous SNV         | CFTR:NM_000492:exon11:c.G1584A:p.E528E                           | NA | rs1800095   | NA |
| chr7 | 1.21E+08 | 1.21E+08 | A       | -    | UTR3         | ING3         | NA                     | NA                                                               | NA | NA          | NA |
| chr7 | 1.21E+08 | 1.21E+08 | C       | G    | UTR3         | ING3         | NA                     | NA                                                               | NA | NA          | NA |
| chr7 | 1.21E+08 | 1.21E+08 | -       | CACC | UTR5         | WNT16        | NA                     | NA                                                               | NA | rs10668066  | NA |
| chr7 | 1.22E+08 | 1.22E+08 | T       | G    | exonic       | PTPRZ1       | nonsynonymous SNV      | 1:n1:c.T8G:p.I3S,PTPRZ1:NM_001206839:exon1:c.T8G:p.I3S,PTPRZ1:NM | NA | rs740965    | NA |
| chr7 | 1.27E+08 | 1.27E+08 | -       | GT   | UTR3         | PAX4         | NA                     | NA                                                               | NA | rs36159526  | NA |
| chr7 | 1.28E+08 | 1.28E+08 | C       | T    | exonic       | FAM71F1      | nonsynonymous SNV      | FAM71F1:NM_032599:exon3:c.C683T:p.S228L                          | NA | rs6949056   | P  |
| chr7 | 1.28E+08 | 1.28E+08 | T       | G    | UTR5         | CALU         | NA                     | NA                                                               | NA | NA          | NA |
| chr7 | 1.3E+08  | 1.3E+08  | -       | TG   | UTR3         | CPA4         | NA                     | NA                                                               | NA | NA          | NA |
| chr7 | 1.3E+08  | 1.3E+08  | T       | G    | UTR3         | CPA4         | NA                     | NA                                                               | NA | rs138933581 | NA |
| chr7 | 1.3E+08  | 1.3E+08  | A       | -    | ncRNA_exonic | MESTIT1      | NA                     | NA                                                               | NA | rs201085778 | NA |

|      |          |          |           |        |              |              |                   |                                                               |    |             |    |
|------|----------|----------|-----------|--------|--------------|--------------|-------------------|---------------------------------------------------------------|----|-------------|----|
| chr7 | 1.3E+08  | 1.3E+08  | A         | -      | UTR3         | COPG2        | NA                | NA                                                            | NA | rs61354155  | NA |
| chr7 | 1.3E+08  | 1.3E+08  | G         | A      | UTR3         | COPG2        | NA                | NA                                                            | NA | NA          | NA |
| chr7 | 1.3E+08  | 1.3E+08  | A         | G      | exonic       | KLF14        | synonymous SNV    | KLF14:NM_138693:exon1:c.T879C:p.T293T                         | NA | NA          | NA |
| chr7 | 1.31E+08 | 1.31E+08 | AA        | -      | UTR3         | MKLN1        | NA                | NA                                                            | NA | NA          | NA |
| chr7 | 1.35E+08 | 1.35E+08 | C         | T      | UTR3         | C7orf73      | NA                | NA                                                            | NA | NA          | NA |
| chr7 | 1.37E+08 | 1.37E+08 | CACA      | -      | UTR5         | CHRM2        | NA                | NA                                                            | NA | NA          | NA |
| chr7 | 1.38E+08 | 1.38E+08 | A         | T      | UTR3         | SVOPL        | NA                | NA                                                            | NA | rs1439793   | NA |
| chr7 | 1.38E+08 | 1.38E+08 | A         | -      | UTR3         | TMEM213      | NA                | NA                                                            | NA | rs61044050  | NA |
| chr7 | 1.39E+08 | 1.39E+08 | T         | -      | UTR3         | KIAA1549     | NA                | NA                                                            | NA | NA          | NA |
| chr7 | 1.4E+08  | 1.4E+08  | CTTCCTTC  | -      | ncRNA_exonic | LOC100134229 | NA                | NA                                                            | NA | NA          | NA |
| chr7 | 1.4E+08  | 1.4E+08  | CTCCCTTT  | -      | ncRNA_exonic | LOC100134229 | NA                | NA                                                            | NA | NA          | NA |
| chr7 | 1.4E+08  | 1.4E+08  | CTTTCTTT  | -      | ncRNA_exonic | LOC100134229 | NA                | NA                                                            | NA | NA          | NA |
| chr7 | 1.4E+08  | 1.4E+08  | A         | G      | exonic       | DENND2A      | synonymous SNV    | DENND2A:NM_015689:exon1:c.T909C:p.P303P                       | NA | NA          | NA |
| chr7 | 1.42E+08 | 1.42E+08 | C         | T      | exonic       | MGAM         | nonsynonymous SNV | MGAM:NM_004668:exon10:c.C1201T:p.R401C                        | NA | rs188481752 | NA |
| chr7 | 1.42E+08 | 1.42E+08 | T         | C      | exonic       | PRSS2        | unknown           | UNKNOWN                                                       | NA | NA          | NA |
| chr7 | 1.43E+08 | 1.43E+08 | C         | T      | exonic       | CLCN1        | synonymous SNV    | CLCN1:NM_000083:exon17:c.C2154T:p.D718D                       | NA | rs2272251   | NA |
| chr7 | 1.43E+08 | 1.43E+08 | T         | C      | exonic       | EPHA1        | synonymous SNV    | EPHA1:NM_005232:exon17:c.A2742G:p.P914P                       | NA | rs1804527   | NA |
| chr7 | 1.43E+08 | 1.43E+08 | G         | C      | exonic       | CTAGE15      | nonsynonymous SNV | CTAGE15:NM_001008747:exon1:c.G463C:p.E155Q                    | NA | rs201542928 | NA |
| chr7 | 1.43E+08 | 1.43E+08 | C         | T      | exonic       | CTAGE15      | nonsynonymous SNV | CTAGE15:NM_001008747:exon1:c.C1091T:p.A364V                   | NA | rs201104924 | NA |
| chr7 | 1.43E+08 | 1.43E+08 | C         | T      | exonic       | FAM115C      | nonsynonymous SNV | F:p.R101W,FAM115C:NM_001130025:exon3:c.C793T:p.R265W,FAM11    | NA | rs143124178 | D  |
| chr7 | 1.43E+08 | 1.43E+08 | C         | T      | UTR3         | FAM115C      | NA                | NA                                                            | NA | rs139515914 | NA |
| chr7 | 1.43E+08 | 1.43E+08 | A         | G      | exonic       | CTAGE6       | nonsynonymous SNV | CTAGE6:NM_178561:exon1:c.T2077C:p.F693L                       | NA | rs62484795  | NA |
| chr7 | 1.44E+08 | 1.44E+08 | G         | A      | ncRNA_UTR3   | CTAGE4       | NA                | NA                                                            | NA | rs1048325   | NA |
| chr7 | 1.49E+08 | 1.49E+08 | G         | -      | UTR3         | EZH2         | NA                | NA                                                            | NA | rs3217095   | NA |
| chr7 | 1.49E+08 | 1.49E+08 | A         | -      | UTR3         | PDIA4        | NA                | NA                                                            | NA | NA          | NA |
| chr7 | 1.49E+08 | 1.49E+08 | A         | -      | UTR3         | ZNF786       | NA                | NA                                                            | NA | NA          | NA |
| chr7 | 1.49E+08 | 1.49E+08 | A         | G      | ncRNA_exonic | LOC155060    | NA                | NA                                                            | NA | rs13236978  | NA |
| chr7 | 1.5E+08  | 1.5E+08  | A         | C      | UTR3         | ZNF862       | NA                | NA                                                            | NA | NA          | NA |
| chr7 | 1.51E+08 | 1.51E+08 | C         | A      | UTR3         | PRKAG2       | NA                | NA                                                            | NA | rs202151040 | NA |
| chr7 | 1.52E+08 | 1.52E+08 | T         | G      | UTR3         | GALNT11      | NA                | NA                                                            | NA | NA          | NA |
| chr7 | 1.52E+08 | 1.52E+08 | T         | G      | UTR3         | GALNT11      | NA                | NA                                                            | NA | NA          | NA |
| chr7 | 1.52E+08 | 1.52E+08 | G         | T      | exonic       | MLL3         | synonymous SNV    | MLL3:NM_170606:exon15:c.C2646A:p.I882I                        | NA | rs201452267 | NA |
| chr7 | 1.52E+08 | 1.52E+08 | G         | A      | exonic       | MLL3         | nonsynonymous SNV | MLL3:NM_170606:exon15:c.C2578T:p.P860S                        | NA | rs112515611 | D  |
| chr7 | 1.55E+08 | 1.55E+08 | T         | C      | UTR3         | EN2          | NA                | NA                                                            | NA | rs55729502  | NA |
| chr7 | 1.55E+08 | 1.55E+08 | C         | T      | UTR3         | EN2          | NA                | NA                                                            | NA | rs3808326   | NA |
| chr7 | 1.55E+08 | 1.55E+08 | A         | G      | UTR5         | CNPY1        | NA                | NA                                                            | NA | rs6947243   | NA |
| chr7 | 1.57E+08 | 1.57E+08 | C         | T      | UTR3         | MNX1         | NA                | NA                                                            | NA | NA          | NA |
| chr7 | 1.59E+08 | 1.59E+08 | G         | C      | UTR3         | VIPR2        | NA                | NA                                                            | NA | rs1965613   | NA |
| chr8 | 1733482  | 1733482  | C         | G      | UTR3         | CLN8         | NA                | NA                                                            | NA | rs111861349 | NA |
| chr8 | 1733695  | 1733695  | A         | C      | UTR3         | CLN8         | NA                | NA                                                            | NA | NA          | NA |
| chr8 | 6793581  | 6793581  | A         | G      | exonic       | DEFA4        | synonymous SNV    | DEFA4:NM_001925:exon3:c.T255C:p.G85G                          | NA | rs2738100   | NA |
| chr8 | 7718180  | 7718180  | T         | C      | exonic       | SPAG11A      | nonsynonymous SNV | SPAG11A:NM_001081552:exon3:c.T227C:p.L76P                     | NA | rs1071602   | NA |
| chr8 | 7721244  | 7721244  | C         | T      | UTR3         | SPAG11A      | NA                | NA                                                            | NA | rs2740048   | NA |
| chr8 | 8176554  | 8176554  | C         | T      | exonic       | SGK223       | nonsynonymous SNV | SGK223:NM_001080826:exon5:c.G3331A:p.A1111T                   | NA | rs12549973  | NA |
| chr8 | 10390452 | 10390452 | C         | T      | exonic       | PRSS55       | nonsynonymous SNV | _001197020:exon4:c.C635T:p.A212V,PRSS55:NM_198464:exon4:c.C63 | NA | rs4406360   | B  |
| chr8 | 10465247 | 10465247 | T         | C      | exonic       | RP1L1        | nonsynonymous SNV | RP1L1:NM_178857:exon4:c.A6361G:p.T2121A                       | NA | NA          | NA |
| chr8 | 11183978 | 11183978 | -         | TTGTTG | UTR3         | MTMR9        | NA                | NA                                                            | NA | rs145931471 | NA |
| chr8 | 11644751 | 11644751 | A         | G      | UTR3         | NEIL2        | NA                | NA                                                            | NA | rs4639      | NA |
| chr8 | 12039778 | 12039778 | G         | A      | UTR3         | FAM86B1      | NA                | NA                                                            | NA | rs2698910   | NA |
| chr8 | 12044328 | 12044328 | T         | C      | exonic       | FAM86B1      | synonymous SNV    | FAM86B1:NM_001083537:exon4:c.A255G:p.S85S                     | NA | rs138175362 | NA |
| chr8 | 12881550 | 12881550 | -         | TT     | UTR3         | KIAA1456     | NA                | NA                                                            | NA | NA          | NA |
| chr8 | 12886083 | 12886083 | C         | T      | UTR3         | KIAA1456     | NA                | NA                                                            | NA | rs7464342   | NA |
| chr8 | 12943086 | 12943086 | T         | -      | UTR3         | DLC1         | NA                | NA                                                            | NA | rs60094700  | NA |
| chr8 | 17080240 | 17080264 | ACATTATCT | -      | UTR3         | ZDHHC2       | NA                | NA                                                            | NA | rs11271419  | NA |
| chr8 | 17796382 | 17796382 | A         | G      | exonic       | PCM1         | nonsynonymous SNV | PCM1:NM_006197:exon5:c.A476G:p.N159S                          | NA | rs41364448  | NA |
| chr8 | 17796383 | 17796383 | C         | T      | exonic       | PCM1         | synonymous SNV    | PCM1:NM_006197:exon5:c.C477T:p.N159N                          | NA | rs114261839 | NA |
| chr8 | 18081198 | 18081198 | A         | -      | UTR3         | NAT1         | NA                | NA                                                            | NA | rs68160149  | NA |
| chr8 | 20002739 | 20002739 | -         | G      | UTR3         | SLC18A1      | NA                | NA                                                            | NA | rs140084839 | NA |
| chr8 | 22069386 | 22069386 | T         | C      | UTR3         | BMP1         | NA                | NA                                                            | NA | rs7001      | NA |
| chr8 | 22546609 | 22546609 | G         | A      | UTR3         | EGR3         | NA                | NA                                                            | NA | NA          | NA |
| chr8 | 23190941 | 23190941 | T         | C      | exonic       | LOXL2        | synonymous SNV    | LOXL2:NM_002318:exon5:c.A939G:p.S313S                         | NA | rs1010156   | NA |
| chr8 | 23429691 | 23429691 | G         | A      | UTR3         | SLC25A37     | NA                | NA                                                            | NA | NA          | NA |
| chr8 | 23536563 | 23536563 | -         | T      | UTR3         | NKX3-1       | NA                | NA                                                            | NA | NA          | NA |
| chr8 | 23537685 | 23537685 | T         | A      | UTR3         | NKX3-1       | NA                | NA                                                            | NA | NA          | NA |
| chr8 | 25269595 | 25269595 | T         | -      | UTR3         | DOCK5        | NA                | NA                                                            | NA | NA          | NA |
| chr8 | 26240646 | 26240646 | A         | G      | UTR5         | BNIP3L       | NA                | NA                                                            | NA | rs1055479   | NA |

|      |          |          |      |      |              |            |                   |                                                               |                                 |                                 |             |    |
|------|----------|----------|------|------|--------------|------------|-------------------|---------------------------------------------------------------|---------------------------------|---------------------------------|-------------|----|
| chr8 | 26435510 | 26435511 | TC   | -    | UTR5         | DPYSL2     | NA                | NA                                                            | NA                              | rs145510839                     | NA          |    |
| chr8 | 26605958 | 26605958 | A    | -    | UTR3         | ADRA1A     | NA                | NA                                                            | NA                              | rs34923219                      | NA          |    |
| chr8 | 27143206 | 27143206 | C    | -    | UTR3         | TRIM35     | NA                | NA                                                            | NA                              | NA                              | NA          |    |
| chr8 | 27336446 | 27336446 | T    | G    | UTR5         | CHRNA2     | NA                | NA                                                            | NA                              | NA                              | NA          |    |
| chr8 | 27879668 | 27879668 | C    | T    | UTR3         | NUGGC      | NA                | NA                                                            | NA                              | NA                              | NA          |    |
| chr8 | 27879674 | 27879674 | C    | T    | UTR3         | NUGGC      | NA                | NA                                                            | NA                              | NA                              | NA          |    |
| chr8 | 28203280 | 28203280 | -    | TTTT | UTR3         | ZNF395     | NA                | NA                                                            | NA                              | NA                              | NA          |    |
| chr8 | 28205777 | 28205778 | TT   | -    | UTR3         | ZNF395     | NA                | NA                                                            | NA                              | NA                              | NA          |    |
| chr8 | 28205806 | 28205806 | G    | A    | UTR3         | ZNF395     | NA                | NA                                                            | NA                              | rs144407947                     | NA          |    |
| chr8 | 28633328 | 28633328 | A    | C    | exonic       | INTS9      | nonsynonymous SNV | 3G:p.V483G,INTS9:NM_001172562:exon14:c.T1439G:p.V480G,INTS9:N | NA                              | NA                              | D           |    |
| chr8 | 31024654 | 31024654 | T    | C    | exonic       | WRN        | nonsynonymous SNV | WRN:NM_000553:exon34:c.T4099C:p.C1367R                        | NA                              | rs1346044                       | D           |    |
| chr8 | 33356074 | 33356074 | A    | G    | exonic       | MAK16      | nonsynonymous SNV | MAK16:NM_032509:exon10:c.A830G:p.Q277R                        | NA                              | rs6468171                       | B           |    |
| chr8 | 33356191 | 33356191 | -    | T    | UTR3         | MAK16,TTI2 | NA                | NA                                                            | NA                              | NA                              | NA          |    |
| chr8 | 33370396 | 33370396 | A    | -    | UTR5         | TTI2       | NA                | NA                                                            | NA                              | NA                              | NA          |    |
| chr8 | 37636436 | 37636436 | A    | -    | UTR3         | PROSC      | NA                | NA                                                            | NA                              | NA                              | NA          |    |
| chr8 | 38000824 | 38000825 | TT   | -    | UTR3         | STAR       | NA                | NA                                                            | NA                              | NA                              | NA          |    |
| chr8 | 38033989 | 38033989 | G    | C    | UTR5         | LSM1       | NA                | NA                                                            | NA                              | rs2270376                       | NA          |    |
| chr8 | 38034322 | 38034322 | C    | A    | UTR5         | BAG4       | NA                | NA                                                            | NA                              | NA                              | NA          |    |
| chr8 | 38096451 | 38096451 | -    | TG   | UTR3         | DDHD2      | NA                | NA                                                            | NA                              | rs145118988                     | NA          |    |
| chr8 | 38096587 | 38096587 | G    | A    | UTR3         | DDHD2      | NA                | NA                                                            | NA                              | rs10103315                      | NA          |    |
| chr8 | 38281181 | 38281181 | A    | -    | intronic     | FGFR1      | NA                | NA                                                            | NA                              | NA                              | NA          |    |
| chr8 | 38585785 | 38585785 | G    | A    | UTR5         | TACC1      | NA                | NA                                                            | NA                              | NA                              | NA          |    |
| chr8 | 38585831 | 38585831 | T    | G    | UTR5         | TACC1      | NA                | NA                                                            | NA                              | NA                              | NA          |    |
| chr8 | 39311600 | 39311600 | C    | T    | ncRNA_exonic | ADAM3A     | NA                | NA                                                            | NA                              | rs7813010                       | NA          |    |
| chr8 | 40438757 | 40438757 | T    | C    | exonic       | ZMAT4      | nonsynonymous SNV | _001135731:exon5:c.A373G:p.T125A,ZMAT4:NM_024645:exon6:c.A6C= | COSM1179839;OCCURENCE=1(prostat | rs17851751                      | B           |    |
| chr8 | 41399511 | 41399511 | G    | T    | exonic       | GINS4      | nonsynonymous SNV | GINS4:NM_032336:exon8:c.G577T:p.D193Y                         | NA                              | NA                              | P           |    |
| chr8 | 41503854 | 41503857 | AAAG | -    | UTR3         | NKX6-3     | NA                | NA                                                            | NA                              | rs140821380                     | NA          |    |
| chr8 | 41790809 | 41790809 | A    | G    | exonic       | KAT6A      | synonymous SNV    | 1643P,KAT6A:NM_001099412:exon18:c.T4929C:p.P1643P,KAT6A:NM    | NA                              | NA                              | NA          |    |
| chr8 | 42010466 | 42010466 | A    | G    | UTR5         | AP3M2      | NA                | NA                                                            | NA                              | rs6982888                       | NA          |    |
| chr8 | 52732287 | 52732287 | C    | T    | UTR3         | PCMTD1     | NA                | NA                                                            | NA                              | rs75854138                      | NA          |    |
| chr8 | 52732781 | 52732781 | A    | T    | UTR3         | PCMTD1     | NA                | NA                                                            | NA                              | rs72644314                      | NA          |    |
| chr8 | 52732792 | 52732792 | T    | A    | UTR3         | PCMTD1     | NA                | NA                                                            | NA                              | rs111380744                     | NA          |    |
| chr8 | 52732831 | 52732834 | TCTC | -    | UTR3         | PCMTD1     | NA                | NA                                                            | NA                              | NA                              | NA          |    |
| chr8 | 52732843 | 52732843 | C    | T    | UTR3         | PCMTD1     | NA                | NA                                                            | NA                              | ID=COSN405080;OCCURENCE=1(lung) | rs116069210 | NA |
| chr8 | 52732871 | 52732871 | T    | C    | UTR3         | PCMTD1     | NA                | NA                                                            | NA                              | ID=COSN405081;OCCURENCE=1(lung) | rs77261625  | NA |
| chr8 | 59363065 | 59363065 | C    | G    | UTR3         | UBXN2B     | NA                | NA                                                            | NA                              | NA                              | NA          |    |
| chr8 | 63891662 | 63891662 | C    | A    | ncRNA_exonic | UG0898H09  | NA                | NA                                                            | NA                              | NA                              | NA          |    |
| chr8 | 69143713 | 69143714 | TT   | -    | UTR3         | PREX2      | NA                | NA                                                            | NA                              | rs148008471                     | NA          |    |
| chr8 | 70745171 | 70745171 | C    | A    | UTR5         | SLCO5A1    | NA                | NA                                                            | NA                              | rs3750268                       | NA          |    |
| chr8 | 71520608 | 71520608 | -    | A    | UTR5         | TRAM1      | NA                | NA                                                            | NA                              | rs111278931                     | NA          |    |
| chr8 | 74235889 | 74235890 | TT   | -    | UTR3         | RDH10      | NA                | NA                                                            | NA                              | NA                              | NA          |    |
| chr8 | 76476959 | 76476959 | C    | A    | UTR3         | HNF4G      | NA                | NA                                                            | NA                              | rs2941479                       | NA          |    |
| chr8 | 76478991 | 76478991 | G    | A    | UTR3         | HNF4G      | NA                | NA                                                            | NA                              | rs11774375                      | NA          |    |
| chr8 | 76479060 | 76479060 | A    | -    | UTR3         | HNF4G      | NA                | NA                                                            | NA                              | rs11309608                      | NA          |    |
| chr8 | 77895047 | 77895047 | A    | -    | UTR3         | PEX2       | NA                | NA                                                            | NA                              | NA                              | NA          |    |
| chr8 | 82665477 | 82665480 | GTGA | -    | splicing     | CHMP4C     | NA                | NA                                                            | NA                              | rs137960856                     | NA          |    |
| chr8 | 82671241 | 82671241 | C    | A    | UTR3         | CHMP4C     | NA                | NA                                                            | NA                              | NA                              | NA          |    |
| chr8 | 82671242 | 82671242 | T    | A    | UTR3         | CHMP4C     | NA                | NA                                                            | NA                              | NA                              | NA          |    |
| chr8 | 82671267 | 82671267 | A    | G    | UTR3         | CHMP4C     | NA                | NA                                                            | NA                              | NA                              | NA          |    |
| chr8 | 82712242 | 82712242 | -    | AA   | UTR3         | SNX16      | NA                | NA                                                            | NA                              | NA                              | NA          |    |
| chr8 | 87666251 | 87666251 | T    | G    | exonic       | CNGB3      | nonsynonymous SNV | CNGB3:NM_019098:exon7:c.A892C:p.T298P                         | NA                              | rs4961206                       | B           |    |
| chr8 | 90914272 | 90914272 | A    | G    | UTR5         | OSGIN2     | NA                | NA                                                            | NA                              | rs2250670                       | NA          |    |
| chr8 | 92971674 | 92971674 | G    | A    | UTR3         | RUNX1T1    | NA                | NA                                                            | NA                              | rs57856280                      | NA          |    |
| chr8 | 95158382 | 95158382 | C    | T    | exonic       | CDH17      | synonymous SNV    | 01144663:exon15:c.G1941A:p.L647L,CDH17:NM_004063:exon15:c.G1  | NA                              | rs1131830                       | NA          |    |
| chr8 | 97244167 | 97244167 | C    | A    | exonic       | UQCRB      | synonymous SNV    | M_001254752:exon3:c.G93T:p.G31G,UQCRB:NM_006294:exon3:c.G93   | NA                              | NA                              | NA          |    |
| chr8 | 98741705 | 98741705 | T    | C    | UTR3         | MTDH       | NA                | NA                                                            | NA                              | rs1045444                       | NA          |    |
| chr8 | 99956761 | 99956761 | G    | C    | UTR5         | OSR2       | NA                | NA                                                            | NA                              | rs4735586                       | NA          |    |
| chr8 | 1.03E+08 | 1.03E+08 | A    | -    | UTR3         | NCALD      | NA                | NA                                                            | NA                              | NA                              | NA          |    |
| chr8 | 1.04E+08 | 1.04E+08 | C    | G    | exonic       | ODF1       | synonymous SNV    | ODF1:NM_024410:exon2:c.C642G:p.P214P                          | NA                              | rs3018445                       | NA          |    |
| chr8 | 1.04E+08 | 1.04E+08 | G    | A    | exonic       | ODF1       | nonsynonymous SNV | ODF1:NM_024410:exon2:c.G647A:p.S216N                          | NA                              | rs2916569                       | NA          |    |
| chr8 | 1.05E+08 | 1.05E+08 | A    | -    | UTR3         | RIMS2      | NA                | NA                                                            | NA                              | NA                              | NA          |    |
| chr8 | 1.1E+08  | 1.1E+08  | A    | T    | exonic       | PKHD1L1    | synonymous SNV    | PKHD1L1:NM_177531:exon53:c.A9084T:p.T3028T                    | NA                              | rs1783148                       | NA          |    |
| chr8 | 1.19E+08 | 1.19E+08 | AAA  | -    | UTR3         | SAMD12     | NA                | NA                                                            | NA                              | NA                              | NA          |    |
| chr8 | 1.19E+08 | 1.19E+08 | T    | G    | UTR3         | SAMD12     | NA                | NA                                                            | NA                              | NA                              | NA          |    |
| chr8 | 1.19E+08 | 1.19E+08 | T    | G    | UTR3         | SAMD12     | NA                | NA                                                            | NA                              | NA                              | NA          |    |
| chr8 | 1.19E+08 | 1.19E+08 | T    | G    | UTR3         | SAMD12     | NA                | NA                                                            | NA                              | NA                              | NA          |    |

|      |          |          |          |          |              |           |                         |                                                               |                                   |             |    |
|------|----------|----------|----------|----------|--------------|-----------|-------------------------|---------------------------------------------------------------|-----------------------------------|-------------|----|
| chr8 | 1.19E+08 | 1.19E+08 | T        | G        | UTR3         | SAMD12    | NA                      | NA                                                            | NA                                | NA          | NA |
| chr8 | 1.19E+08 | 1.19E+08 | T        | A        | UTR3         | SAMD12    | NA                      | NA                                                            | NA                                | NA          | NA |
| chr8 | 1.21E+08 | 1.21E+08 | C        | T        | exonic       | TAF2      | synonymous SNV          | TAF2:NM_003184:exon17:c.G2250A:p.Q750Q                        | NA                                | rs7002501   | NA |
| chr8 | 1.21E+08 | 1.21E+08 | C        | G        | exonic       | TAF2      | nonsynonymous SNV       | TAF2:NM_003184:exon11:c.G1340C:p.S447T                        | rs16893214                        | rs9297605   | B  |
| chr8 | 1.21E+08 | 1.21E+08 | G        | A        | UTR5         | TAF2      | NA                      | NA                                                            | NA                                | rs16893214  | NA |
| chr8 | 1.23E+08 | 1.23E+08 | G        | C        | ncRNA_exonic | HAS2-AS1  | NA                      | NA                                                            | NA                                | rs2028506   | NA |
| chr8 | 1.23E+08 | 1.23E+08 | T        | A        | ncRNA_UTR5   | HAS2      | NA                      | NA                                                            | NA                                | rs3853253   | NA |
| chr8 | 1.23E+08 | 1.23E+08 | C        | T        | ncRNA_UTR5   | HAS2      | NA                      | NA                                                            | NA                                | NA          | NA |
| chr8 | 1.24E+08 | 1.24E+08 | -        | T        | UTR3         | ZHX1      | NA                      | NA                                                            | NA                                | NA          | NA |
| chr8 | 1.26E+08 | 1.26E+08 | C        | T        | UTR5         | TRIB1     | NA                      | NA                                                            | NA                                | rs3201475   | NA |
| chr8 | 1.31E+08 | 1.31E+08 | A        | G        | exonic       | FAM49B    | synonymous SNV          | _016623:exon8:c.T585C:p.T195T,FAM49B:NM_001256763:exon9:c.T5  | NA                                | rs1051893   | NA |
| chr8 | 1.31E+08 | 1.31E+08 | A        | C        | ncRNA_exonic | ASAP1-IT1 | NA                      | NA                                                            | NA                                | NA          | NA |
| chr8 | 1.34E+08 | 1.34E+08 | G        | A        | exonic       | TG        | nonsynonymous SNV       | TG:NM_003235:exon44:c.G7589A:p.R2530Q                         | NA                                | rs1133076   | B  |
| chr8 | 1.4E+08  | 1.4E+08  | G        | A        | UTR5         | COL22A1   | NA                      | NA                                                            | NA                                | NA          | NA |
| chr8 | 1.42E+08 | 1.42E+08 | A        | G        | exonic       | SLC45A4   | synonymous SNV          | SLC45A4:NM_001080431:exon7:c.T2070C:p.G690G                   | NA                                | rs7017848   | NA |
| chr8 | 1.42E+08 | 1.42E+08 | T        | C        | exonic       | SLC45A4   | nonsynonymous SNV       | SLC45A4:NM_001080431:exon7:c.A1999G:p.N667D                   | NA                                | rs3739238   | B  |
| chr8 | 1.42E+08 | 1.42E+08 | T        | C        | ncRNA_exonic | LOC731779 | NA                      | NA                                                            | NA                                | rs6987289   | NA |
| chr8 | 1.42E+08 | 1.42E+08 | G        | A        | exonic       | MROH5     | unknown                 | UNKNOWN                                                       | NA                                | rs12547980  | NA |
| chr8 | 1.43E+08 | 1.43E+08 | A        | G        | exonic       | MROH5     | unknown                 | UNKNOWN                                                       | OSN168449;OCCURENCE=1(large_intes | rs2613637   | NA |
| chr8 | 1.43E+08 | 1.43E+08 | T        | C        | exonic       | TSNARE1   | nonsynonymous SNV       | TSNARE1:NM_145003:exon4:c.A352G:p.T118A                       | NA                                | rs10100935  | B  |
| chr8 | 1.44E+08 | 1.44E+08 | G        | A        | UTR3         | PSCA      | NA                      | NA                                                            | NA                                | rs10216533  | NA |
| chr8 | 1.44E+08 | 1.44E+08 | G        | A        | UTR3         | ZFP41     | NA                      | NA                                                            | NA                                | rs34386291  | NA |
| chr8 | 1.45E+08 | 1.45E+08 | A        | T        | ncRNA_exonic | BREA2     | NA                      | NA                                                            | NA                                | rs1141722   | NA |
| chr8 | 1.45E+08 | 1.45E+08 | CT       | -        | UTR3         | FAM83H    | NA                      | NA                                                            | NA                                | rs34283115  | NA |
| chr8 | 1.45E+08 | 1.45E+08 | C        | T        | UTR3         | PARP10    | NA                      | NA                                                            | NA                                | rs1134030   | NA |
| chr8 | 1.45E+08 | 1.45E+08 | G        | T        | UTR3         | GRINA     | NA                      | NA                                                            | NA                                | rs9100      | NA |
| chr8 | 1.45E+08 | 1.45E+08 | A        | C        | exonic       | SPATC1    | nonsynonymous SNV       | _001134374:exon3:c.A979C:p.T327P,SPATC1:NM_198572:exon3:c.A9  | NA                                | NA          | D  |
| chr8 | 1.45E+08 | 1.45E+08 | T        | C        | exonic       | SPATC1    | nonsynonymous SNV       | _001134374:exon3:c.T985C:p.S329P,SPATC1:NM_198572:exon3:c.T9  | NA                                | NA          | P  |
| chr8 | 1.46E+08 | 1.46E+08 | -        | A        | UTR3         | TONSL     | NA                      | NA                                                            | NA                                | rs35298598  | NA |
| chr8 | 1.46E+08 | 1.46E+08 | T        | G        | UTR3         | GPT       | NA                      | NA                                                            | NA                                | NA          | NA |
| chr8 | 1.46E+08 | 1.46E+08 | C        | G        | UTR3         | GPT       | NA                      | NA                                                            | NA                                | NA          | NA |
| chr8 | 1.46E+08 | 1.46E+08 | T        | G        | UTR3         | GPT       | NA                      | NA                                                            | NA                                | NA          | NA |
| chr8 | 1.46E+08 | 1.46E+08 | G        | A        | ncRNA_exonic | TMED10P1  | NA                      | NA                                                            | NA                                | NA          | NA |
| chr8 | 1.46E+08 | 1.46E+08 | C        | T        | UTR3         | C8orf33   | NA                      | NA                                                            | NA                                | rs6986329   | NA |
| chr9 | 14710    | 14710    | T        | A        | UTR3         | WASH1     | NA                      | NA                                                            | NA                                | NA          | NA |
| chr9 | 14863    | 14863    | A        | G        | exonic       | WASH1     | synonymous SNV          | WASH1:NM_182905:exon11:c.T1342C:p.L448L                       | SN405104,COSN405105;OCCURENCE=3   | rs2974794   | NA |
| chr9 | 163985   | 163985   | A        | G        | exonic       | CBWD1     | synonymous SNV          | 83C:p.Y161Y,CBWD1:NM_018491:exon5:c.T483C:p.Y161Y,CBWD1:NM    | NA                                | rs1127420   | NA |
| chr9 | 214027   | 214027   | G        | T        | UTR3         | C9orf66   | NA                      | NA                                                            | NA                                | NA          | NA |
| chr9 | 2029199  | 2029199  | G        | A        | exonic       | SMARCA2   | synonymous SNV          | NM_003070:exon2:c.G177A:p.T59T,SMARCA2:NM_139045:exon2:c.G1   | NA                                | rs10964471  | NA |
| chr9 | 2039777  | 2039779  | CAG      | -        | exonic       | SMARCA2   | nonframeshift deletion  | :exon4:c.667_669del:p.223_223del,SMARCA2:NM_139045:exon4:c.66 | NA                                | rs113070757 | NA |
| chr9 | 4586213  | 4586213  | -        | TA       | UTR3         | SLC1A1    | NA                      | NA                                                            | NA                                | rs150334575 | NA |
| chr9 | 4622453  | 4622453  | T        | C        | exonic       | SPATA6L   | nonsynonymous SNV       | SPATA6L:NM_001039395:exon6:c.A553G:p.R185G                    | NA                                | rs10974657  | P  |
| chr9 | 4712080  | 4712080  | A        | G        | UTR3         | AK3       | NA                      | NA                                                            | NA                                | NA          | NA |
| chr9 | 6757661  | 6757661  | C        | A        | UTR5         | KDM4C     | NA                      | NA                                                            | NA                                | NA          | NA |
| chr9 | 12775861 | 12775861 | -        | gCGGCGGG | exonic       | LURAP1L   | nonframeshift insertion | LRAP1L:NM_203403:exon1:c.147_148insGGCGGCGGC:p.G49delinsGGC   | NA                                | rs139315731 | NA |
| chr9 | 14993419 | 14993419 | G        | T        | ncRNA_exonic | LOC389705 | NA                      | NA                                                            | NA                                | rs4548277   | NA |
| chr9 | 16412721 | 16412732 | GAGAGAGA | -        | UTR3         | BNC2      | NA                      | NA                                                            | NA                                | NA          | NA |
| chr9 | 16413355 | 16413356 | TT       | -        | UTR3         | BNC2      | NA                      | NA                                                            | NA                                | NA          | NA |
| chr9 | 16414917 | 16414917 | T        | -        | UTR3         | BNC2      | NA                      | NA                                                            | NA                                | NA          | NA |
| chr9 | 16418871 | 16418871 | -        | CACACACA | UTR3         | BNC2      | NA                      | NA                                                            | NA                                | rs139614646 | NA |
| chr9 | 17273731 | 17273731 | A        | G        | exonic       | CNTLN     | nonsynonymous SNV       | _001114395:exon6:c.A850G:p.T284A,CNTLN:NM_017738:exon6:c.A85  | NA                                | rs3808795   | B  |
| chr9 | 19049596 | 19049596 | C        | A        | UTR5         | RRAGA     | NA                      | NA                                                            | NA                                | rs2233802   | NA |
| chr9 | 19054549 | 19054549 | T        | G        | UTR3         | HAUS6     | NA                      | NA                                                            | NA                                | rs151216206 | NA |
| chr9 | 19060197 | 19060197 | A        | T        | exonic       | HAUS6     | nonsynonymous SNV       | 01270890:exon15:c.T1549A:p.S517T,HAUS6:NM_017645:exon15:c.T1  | NA                                | rs41269003  | D  |
| chr9 | 20346360 | 20346360 | G        | A        | UTR3         | MLLT3     | NA                      | NA                                                            | NA                                | NA          | NA |
| chr9 | 27062666 | 27062666 | G        | A        | exonic       | IFT74     | nonsynonymous SNV       | A:p.V579M,IFT74:NM_001099223:exon20:c.G1735A:p.V579M,IFT74:N  | NA                                | rs138591335 | P  |
| chr9 | 27205021 | 27205021 | G        | A        | exonic       | TEK       | synonymous SNV          | TEK:NM_000459:exon14:c.G2322A:p.R774R                         | NA                                | rs542913    | NA |
| chr9 | 27284708 | 27284708 | T        | A        | UTR3         | EQTN      | NA                      | NA                                                            | OSN168495;OCCURENCE=1(large_intes | rs1057524   | NA |
| chr9 | 32553781 | 32553781 | C        | A        | ncRNA_UTR3   | NDUFB6    | NA                      | NA                                                            | NA                                | NA          | NA |
| chr9 | 33043991 | 33043993 | AAA      | -        | UTR3         | SMU1      | NA                      | NA                                                            | NA                                | rs57341069  | NA |
| chr9 | 33047211 | 33047211 | A        | -        | UTR3         | SMU1      | NA                      | NA                                                            | NA                                | NA          | NA |
| chr9 | 33111199 | 33111199 | C        | T        | UTR3         | B4GALT1   | NA                      | NA                                                            | NA                                | rs74995636  | NA |
| chr9 | 33111274 | 33111274 | -        | AAAAAAA  | UTR3         | B4GALT1   | NA                      | NA                                                            | NA                                | NA          | NA |
| chr9 | 33384951 | 33384951 | C        | G        | UTR3         | AQP7      | NA                      | NA                                                            | NA                                | rs75724774  | NA |
| chr9 | 33384960 | 33384960 | C        | T        | UTR3         | AQP7      | NA                      | NA                                                            | NA                                | rs76796426  | NA |
| chr9 | 33384977 | 33384977 | T        | G        | UTR3         | AQP7      | NA                      | NA                                                            | ID=COSN405112;OCCURENCE=1(lung)   | rs13434     | NA |

|      |          |          |        |      |              |                    |                      |                                                                |                                  |             |    |
|------|----------|----------|--------|------|--------------|--------------------|----------------------|----------------------------------------------------------------|----------------------------------|-------------|----|
| chr9 | 33385047 | 33385047 | G      | A    | exonic       | AQP7               | nonsynonymous SNV    | AQP7:NM_001170:exon8:c.C985T:p.P329S                           | NA                               | rs78431873  | B  |
| chr9 | 33385709 | 33385709 | C      | T    | exonic       | AQP7               | synonymous SNV       | AQP7:NM_001170:exon7:c.G681A:p.P227P                           | NA                               | rs116294914 | NA |
| chr9 | 33386465 | 33386465 | A      | G    | exonic       | AQP7               | nonsynonymous SNV    | AQP7:NM_001170:exon5:c.T343C:p.Y115H                           | NA                               | rs74668961  | B  |
| chr9 | 33402374 | 33402374 | G      | C    | UTR5         | AQP7               | NA                   | NA                                                             | NA                               | NA          | NA |
| chr9 | 34834937 | 34834937 | A      | G    | ncRNA_exonic | FAM205B            | NA                   | NA                                                             | OSM1108519;OCCURENCE=2(endometri | rs202203144 | NA |
| chr9 | 35609148 | 35609148 | A      | C    | exonic       | TESK1              | synonymous SNV       | TESK1:NM_006285:exon10:c.A1290C:p.T430T                        | NA                               | NA          | NA |
| chr9 | 35609172 | 35609172 | A      | C    | exonic       | TESK1              | synonymous SNV       | TESK1:NM_006285:exon10:c.A1314C:p.L438L                        | NA                               | NA          | NA |
| chr9 | 35609179 | 35609179 | T      | C    | exonic       | TESK1              | nonsynonymous SNV    | TESK1:NM_006285:exon10:c.T1321C:p.S441P                        | NA                               | NA          | D  |
| chr9 | 36216667 | 36216672 | TATTTA | -    | UTR3         | GNE                | NA                   | NA                                                             | NA                               | rs201131813 | NA |
| chr9 | 37778498 | 37778498 | C      | T    | UTR3         | TRMT10B            | NA                   | NA                                                             | NA                               | rs45539136  | NA |
| chr9 | 37863149 | 37863149 | G      | C    | UTR3         | DCAF10             | NA                   | NA                                                             | NA                               | rs73449401  | NA |
| chr9 | 37863196 | 37863196 | A      | G    | UTR3         | DCAF10             | NA                   | NA                                                             | NA                               | rs112696997 | NA |
| chr9 | 37864020 | 37864020 | C      | -    | UTR3         | DCAF10             | NA                   | NA                                                             | NA                               | rs35009204  | NA |
| chr9 | 37918485 | 37918486 | TG     | -    | UTR3         | SHB                | NA                   | NA                                                             | NA                               | rs66479155  | NA |
| chr9 | 38398153 | 38398153 | A      | T    | UTR3         | ALDH1B1            | NA                   | NA                                                             | NA                               | rs74363930  | NA |
| chr9 | 38409062 | 38409062 | A      | T    | UTR3         | IGFBPL1            | NA                   | NA                                                             | NA                               | rs73646183  | NA |
| chr9 | 41952522 | 41952522 | T      | A    | ncRNA_exonic | MGC21881           | NA                   | NA                                                             | NA                               | rs62539305  | NA |
| chr9 | 41952549 | 41952549 | G      | C    | ncRNA_exonic | MGC21881           | NA                   | NA                                                             | NA                               | rs1054552   | NA |
| chr9 | 41953020 | 41953020 | T      | C    | ncRNA_exonic | MGC21881           | NA                   | NA                                                             | NA                               | rs201318708 | NA |
| chr9 | 41959519 | 41959519 | A      | G    | ncRNA_exonic | KGFLP2             | NA                   | NA                                                             | NA                               | rs62563796  | NA |
| chr9 | 41960898 | 41960898 | G      | T    | ncRNA_exonic | KGFLP2             | NA                   | NA                                                             | NA                               | rs201761160 | NA |
| chr9 | 43630712 | 43630712 | A      | G    | UTR5         | SPATA31A6          | NA                   | NA                                                             | NA                               | rs62556735  | NA |
| chr9 | 66499694 | 66499694 | A      | G    | ncRNA_exonic | PTGER4P2-CDK2AP2P2 | NA                   | NA                                                             | NA                               | rs111388370 | NA |
| chr9 | 66499867 | 66499867 | T      | C    | ncRNA_exonic | PTGER4P2-CDK2AP2P2 | NA                   | NA                                                             | NA                               | rs7862419   | NA |
| chr9 | 66501254 | 66501254 | A      | C    | ncRNA_exonic | PTGER4P2-CDK2AP2P2 | NA                   | NA                                                             | NA                               | rs10442087  | NA |
| chr9 | 66501326 | 66501326 | T      | C    | ncRNA_exonic | PTGER4P2-CDK2AP2P2 | NA                   | NA                                                             | NA                               | rs28692535  | NA |
| chr9 | 66501329 | 66501329 | C      | G    | ncRNA_exonic | PTGER4P2-CDK2AP2P2 | NA                   | NA                                                             | NA                               | rs201855807 | NA |
| chr9 | 66501437 | 66501437 | A      | -    | ncRNA_exonic | PTGER4P2-CDK2AP2P2 | NA                   | NA                                                             | NA                               | NA          | NA |
| chr9 | 66502241 | 66502241 | G      | A    | ncRNA_exonic | PTGER4P2-CDK2AP2P2 | NA                   | NA                                                             | NA                               | rs1492778   | NA |
| chr9 | 66502640 | 66502640 | A      | G    | ncRNA_exonic | PTGER4P2-CDK2AP2P2 | NA                   | NA                                                             | NA                               | rs74961113  | NA |
| chr9 | 67281729 | 67281729 | G      | A    | ncRNA_exonic | AQP7P1             | NA                   | NA                                                             | NA                               | rs9696090   | NA |
| chr9 | 67281733 | 67281733 | A      | G    | ncRNA_exonic | AQP7P1             | NA                   | NA                                                             | NA                               | NA          | NA |
| chr9 | 67281734 | 67281734 | G      | A    | ncRNA_exonic | AQP7P1             | NA                   | NA                                                             | NA                               | rs2321020   | NA |
| chr9 | 69200873 | 69200873 | G      | A    | exonic       | FOXD4L6            | nonsynonymous SNV    | FOXD4L6:NM_001085476:exon1:c.C740T:p.P247L                     | NA                               | NA          | D  |
| chr9 | 69206924 | 69206924 | T      | A    | exonic       | CBWD6              | nonsynonymous SNV    | CBWD6:NM_001085457:exon12:c.A864T:p.E288D                      | NA                               | rs1127334   | B  |
| chr9 | 69238294 | 69238294 | T      | C    | exonic       | CBWD6              | nonsynonymous SNV    | CBWD6:NM_001085457:exon8:c.A598G:p.I200V                       | NA                               | NA          | B  |
| chr9 | 69416170 | 69416170 | C      | G    | exonic       | ANKRD20A4          | nonsynonymous SNV    | ANKRD20A4:NM_001098805:exon12:c.C1117G:p.Q373E                 | NA                               | rs199732379 | B  |
| chr9 | 69424030 | 69424030 | T      | C    | exonic       | ANKRD20A4          | nonsynonymous SNV    | ANKRD20A4:NM_001098805:exon15:c.T2326C:p.F776L                 | NA                               | rs78100933  | B  |
| chr9 | 69424049 | 69424049 | G      | A    | exonic       | ANKRD20A4          | nonsynonymous SNV    | ANKRD20A4:NM_001098805:exon15:c.G2345A:p.S782N                 | NA                               | rs200653869 | B  |
| chr9 | 69424057 | 69424057 | C      | G    | exonic       | ANKRD20A4          | nonsynonymous SNV    | ANKRD20A4:NM_001098805:exon15:c.C2353G:p.L785V                 | NA                               | NA          | B  |
| chr9 | 69424098 | 69424098 | G      | A    | exonic       | ANKRD20A4          | synonymous SNV       | ANKRD20A4:NM_001098805:exon15:c.C2394A:p.Q798Q                 | NA                               | NA          | NA |
| chr9 | 69424114 | 69424114 | A      | G    | exonic       | ANKRD20A4          | nonsynonymous SNV    | ANKRD20A4:NM_001098805:exon15:c.A2410G:p.T804A                 | NA                               | rs4032009   | B  |
| chr9 | 69424120 | 69424120 | G      | A    | exonic       | ANKRD20A4          | nonsynonymous SNV    | ANKRD20A4:NM_001098805:exon15:c.G2416A:p.V806I                 | NA                               | NA          | B  |
| chr9 | 69424121 | 69424121 | T      | G    | exonic       | ANKRD20A4          | nonsynonymous SNV    | ANKRD20A4:NM_001098805:exon15:c.T2417G:p.V806G                 | NA                               | rs201002653 | B  |
| chr9 | 69424385 | 69424385 | A      | G    | UTR3         | ANKRD20A4          | NA                   | NA                                                             | NA                               | rs4116477   | NA |
| chr9 | 69663721 | 69663721 | C      | G    | ncRNA_exonic | LOC100133920       | NA                   | NA                                                             | NA                               | rs199847383 | NA |
| chr9 | 69664229 | 69664229 | C      | A    | ncRNA_exonic | LOC100133920       | NA                   | NA                                                             | NA                               | rs200049495 | NA |
| chr9 | 69664284 | 69664284 | A      | G    | ncRNA_exonic | LOC100133920       | NA                   | NA                                                             | NA                               | rs200802718 | NA |
| chr9 | 69664315 | 69664315 | G      | A    | ncRNA_exonic | LOC100133920       | NA                   | NA                                                             | NA                               | rs4248773   | NA |
| chr9 | 69664842 | 69664842 | T      | A    | ncRNA_exonic | LOC100133920       | NA                   | NA                                                             | NA                               | rs75601058  | NA |
| chr9 | 70175856 | 70175856 | C      | T    | UTR3         | FOXD4L5            | NA                   | NA                                                             | NA                               | rs187159666 | NA |
| chr9 | 70900911 | 70900911 | -      | A    | exonic       | CBWD3              | frameshift insertion | CBWD3:NM_201453:exon11:c.771_772insA:p.Q257fs                  | NA                               | NA          | NA |
| chr9 | 70918189 | 70918189 | A      | T    | exonic       | FOXD4L3            | stopgain SNV         | FOXD4L3:NM_199135:exon1:c.A322T:p.K108X                        | NA                               | rs7034645   | NA |
| chr9 | 70970401 | 70970401 | T      | C    | ncRNA_exonic | PGM5-AS1           | NA                   | NA                                                             | NA                               | NA          | NA |
| chr9 | 72046058 | 72046059 | AA     | -    | UTR3         | APBA1              | NA                   | NA                                                             | NA                               | NA          | NA |
| chr9 | 73002115 | 73002115 | -      | T    | UTR3         | KLF9               | NA                   | NA                                                             | NA                               | NA          | NA |
| chr9 | 74298435 | 74298435 | -      | ACAC | UTR3         | TMEM2              | NA                   | NA                                                             | NA                               | NA          | NA |
| chr9 | 77407636 | 77407636 | C      | T    | exonic       | TRPM6              | synonymous SNV       | rs.p.Q809Q,TRPM6:NM_001177311:exon19:c.G2427A:p.Q809Q,TRPM6    | NA                               | rs4145894   | NA |
| chr9 | 77761920 | 77761920 | T      | -    | UTR3         | OSTF1              | NA                   | NA                                                             | NA                               | rs5898396   | NA |
| chr9 | 77761950 | 77761951 | TT     | -    | UTR3         | OSTF1              | NA                   | NA                                                             | NA                               | NA          | NA |
| chr9 | 78773958 | 78773958 | A      | C    | exonic       | PCSK5              | nonsynonymous SNV    | rs1190482:exon12:c.A1490C:p.N497T,PCSK5:NM_006200:exon12:c.A14 | NA                               | NA          | D  |
| chr9 | 78808329 | 78808329 | G      | A    | UTR3         | PCSK5              | NA                   | NA                                                             | NA                               | rs151056382 | NA |
| chr9 | 78808329 | 78808329 | -      | AAAA | UTR3         | PCSK5              | NA                   | NA                                                             | NA                               | NA          | NA |
| chr9 | 79465559 | 79465559 | C      | A    | exonic       | PRUNE2             | nonsynonymous SNV    | PRUNE2:NM_015225:exon3:c.G164T:p.C55F                          | NA                               | NA          | NA |
| chr9 | 86153159 | 86153159 | T      | G    | UTR5         | FRMD3              | NA                   | NA                                                             | NA                               | rs4529536   | NA |
| chr9 | 86354511 | 86354511 | G      | C    | UTR3         | GKAP1              | NA                   | NA                                                             | NA                               | rs4750      | NA |



|      |          |          |          |          |              |                          |                         |                                                                          |    |             |    |
|------|----------|----------|----------|----------|--------------|--------------------------|-------------------------|--------------------------------------------------------------------------|----|-------------|----|
| chr9 | 86595070 | 86595070 | C        | T        | UTR5         | HNRNPK                   | NA                      | NA                                                                       | NA | rs296887    | NA |
| chr9 | 87285595 | 87285595 | C        | G        | UTR5         | NTRK2                    | NA                      | NA                                                                       | NA | rs1187325   | NA |
| chr9 | 87430433 | 87430433 | -        | T        | UTR3         | NTRK2                    | NA                      | NA                                                                       | NA | NA          | NA |
| chr9 | 88959938 | 88959938 | C        | T        | exonic       | ZCCHC6                   | synonymous SNV          | 51A:p.L317L,ZCCHC6:NM_001185074:exon5:c.G951A:p.L317L,ZCCHC6             | NA | rs791323    | NA |
| chr9 | 89763574 | 89763574 | A        | C        | UTR5         | C9orf170                 | NA                      | NA                                                                       | NA | rs461126    | NA |
| chr9 | 90323492 | 90323492 | G        | A        | UTR3         | DAPK1                    | NA                      | NA                                                                       | NA | rs36220453  | NA |
| chr9 | 94896220 | 94896220 | -        | CCCA     | ncRNA_exonic | LOC100128076             | NA                      | NA                                                                       | NA | rs111380347 | NA |
| chr9 | 95993326 | 95993326 | T        | C        | exonic       | WNK2                     | synonymous SNV          | WNK2:NM_006648:exon3:c.T1011C:p.S337S                                    | NA | rs11787888  | NA |
| chr9 | 96026243 | 96026243 | G        | A        | exonic       | WNK2                     | synonymous SNV          | WNK2:NM_006648:exon15:c.G3624A:p.T1208T                                  | NA | rs55981123  | NA |
| chr9 | 96080699 | 96080699 | C        | T        | exonic       | C9orf129                 | nonsynonymous SNV       | C9orf129:NM_001098808:exon5:c.G572A:p.R191H                              | NA | rs36081907  | NA |
| chr9 | 99264877 | 99264877 | TT       | -        | UTR3         | CDC14B                   | NA                      | NA                                                                       | NA | rs138076839 | NA |
| chr9 | 99702876 | 99702876 | T        | C        | UTR3         | NUTMG                    | NA                      | NA                                                                       | NA | rs144789903 | NA |
| chr9 | 1E+08    | 1E+08    | G        | A        | ncRNA_exonic | 0499484,LOC100499484-C90 | NA                      | NA                                                                       | NA | rs7020002   | NA |
| chr9 | 1E+08    | 1E+08    | -        | GAGGAG   | exonic       | CCDC180                  | nonframeshift insertion | CDC180:NM_020893:exon18:c.2325_2326insGAGGAG:p.E775delinsEE              | NA | rs113264216 | NA |
| chr9 | 1.01E+08 | 1.01E+08 | G        | C        | UTR5         | FOXE1                    | NA                      | NA                                                                       | NA | rs7849497   | NA |
| chr9 | 1.01E+08 | 1.01E+08 | C        | G        | UTR3         | HEMGN                    | NA                      | NA                                                                       | NA | NA          | NA |
| chr9 | 1.01E+08 | 1.01E+08 | T        | C        | UTR3         | CORO2A                   | NA                      | NA                                                                       | NA | rs1746239   | NA |
| chr9 | 1.02E+08 | 1.02E+08 | A        | T        | exonic       | GALNT12                  | nonsynonymous SNV       | GALNT12:NM_024642:exon1:c.A356T:p.E119V                                  | NA | rs1137654   | P  |
| chr9 | 1.05E+08 | 1.05E+08 | C        | T        | UTR5         | GRIN3A                   | NA                      | NA                                                                       | NA | rs62577464  | NA |
| chr9 | 1.12E+08 | 1.12E+08 | G        | A        | exonic       | TMEM245                  | synonymous SNV          | TMEM245:NM_032012:exon3:c.C702T:p.S234S                                  | NA | rs2271878   | NA |
| chr9 | 1.12E+08 | 1.12E+08 | G        | T        | exonic       | EPB41L4B                 | nonsynonymous SNV       | EPB41L4B:NM_018424:exon3:c.C418A:p.L140M,EPB41L4B:NM_019114:exon3:c.C4   | NA | NA          | D  |
| chr9 | 1.13E+08 | 1.13E+08 | C        | T        | UTR3         | PALM2                    | NA                      | NA                                                                       | NA | rs10816907  | NA |
| chr9 | 1.13E+08 | 1.13E+08 | C        | T        | exonic       | SVEP1                    | nonsynonymous SNV       | SVEP1:NM_153366:exon7:c.G1519A:p.V507I                                   | NA | rs872665    | NA |
| chr9 | 1.14E+08 | 1.14E+08 | A        | G        | UTR3         | ZNF483                   | NA                      | NA                                                                       | NA | rs7029060   | NA |
| chr9 | 1.14E+08 | 1.14E+08 | G        | C        | UTR5         | PTGR1                    | NA                      | NA                                                                       | NA | rs41279067  | NA |
| chr9 | 1.14E+08 | 1.14E+08 | G        | C        | UTR5         | PTGR1                    | NA                      | NA                                                                       | NA | rs41279069  | NA |
| chr9 | 1.14E+08 | 1.14E+08 | A        | G        | exonic       | C9orf84                  | nonsynonymous SNV       | C9orf84:NM_01080551:exon20:c.T2786C:p.L929P,C9orf84:NM_173521:exon22:c.T | NA | rs6477845   | B  |
| chr9 | 1.14E+08 | 1.14E+08 | A        | C        | exonic       | C9orf84                  | nonsynonymous SNV       | C9orf84:NM_01080551:exon16:c.T2310G:p.N770K,C9orf84:NM_173521:exon18:c.T | NA | rs7036568   | B  |
| chr9 | 1.16E+08 | 1.16E+08 | GT       | -        | UTR3         | SNX30                    | NA                      | NA                                                                       | NA | NA          | NA |
| chr9 | 1.16E+08 | 1.16E+08 | TT       | -        | UTR3         | SNX30                    | NA                      | NA                                                                       | NA | rs138062484 | NA |
| chr9 | 1.16E+08 | 1.16E+08 | GTGTGCTC | -        | UTR5         | SLC46A2                  | NA                      | NA                                                                       | NA | rs200371278 | NA |
| chr9 | 1.16E+08 | 1.16E+08 | C        | A        | UTR5         | ZNF883                   | NA                      | NA                                                                       | NA | rs1324934   | NA |
| chr9 | 1.16E+08 | 1.16E+08 | C        | T        | ncRNA_exonic | FAM225A                  | NA                      | NA                                                                       | NA | rs62576060  | NA |
| chr9 | 1.16E+08 | 1.16E+08 | T        | -        | UTR3         | RNF183                   | NA                      | NA                                                                       | NA | NA          | NA |
| chr9 | 1.17E+08 | 1.17E+08 | CA       | -        | UTR3         | ZNF618                   | NA                      | NA                                                                       | NA | rs147537659 | NA |
| chr9 | 1.17E+08 | 1.17E+08 | A        | G        | exonic       | AKNA                     | nonsynonymous SNV       | AKNA:NM_030767:exon21:c.T3907C:p.S1303P                                  | NA | rs2250242   | B  |
| chr9 | 1.17E+08 | 1.17E+08 | A        | G        | exonic       | DFNB31                   | synonymous SNV          | DFNB31:NM_001173425:exon6:c.T1353C:p.G451G,DFNB31                        | NA | rs4979387   | NA |
| chr9 | 1.18E+08 | 1.18E+08 | T        | C        | UTR3         | TNFSF8                   | NA                      | NA                                                                       | NA | rs3181370   | NA |
| chr9 | 1.18E+08 | 1.18E+08 | G        | A        | UTR3         | TNFSF8                   | NA                      | NA                                                                       | NA | rs3181369   | NA |
| chr9 | 1.18E+08 | 1.18E+08 | C        | T        | exonic       | TNC                      | nonsynonymous SNV       | TNC:NM_002160:exon19:c.G5341A:p.A1781T                                   | NA | rs2274750   | P  |
| chr9 | 1.19E+08 | 1.19E+08 | -        | AA       | UTR3         | PAPPA                    | NA                      | NA                                                                       | NA | NA          | NA |
| chr9 | 1.23E+08 | 1.23E+08 | C        | G        | exonic       | CDK5RAP2                 | nonsynonymous SNV       | CDK5RAP2:NM_001011649:exon31:c.G4618C:p.V1540L,CDK5                      | NA | rs4837768   | B  |
| chr9 | 1.26E+08 | 1.26E+08 | -        | TA       | UTR3         | RABGAP1                  | NA                      | NA                                                                       | NA | rs112214533 | NA |
| chr9 | 1.26E+08 | 1.26E+08 | G        | C        | exonic       | CRB2                     | nonsynonymous SNV       | CRB2:NM_173689:exon3:c.G476C:p.G159A                                     | NA | rs1105222   | D  |
| chr9 | 1.26E+08 | 1.26E+08 | G        | T        | exonic       | DENND1A                  | nonsynonymous SNV       | DENND1A:NM_024820:exon21:c.C1623A:p.S541R                                | NA | NA          | NA |
| chr9 | 1.31E+08 | 1.31E+08 | A        | G        | UTR3         | AK1                      | NA                      | NA                                                                       | NA | NA          | NA |
| chr9 | 1.31E+08 | 1.31E+08 | A        | G        | intronic     | SLC25A25                 | NA                      | NA                                                                       | NA | rs947623    | NA |
| chr9 | 1.31E+08 | 1.31E+08 | G        | A        | UTR5         | PTGES2                   | NA                      | NA                                                                       | NA | rs10819365  | NA |
| chr9 | 1.31E+08 | 1.31E+08 | -        | GTGCGCGG | UTR5         | PTGES2                   | NA                      | NA                                                                       | NA | rs11283643  | NA |
| chr9 | 1.31E+08 | 1.31E+08 | A        | C        | exonic       | CERCAM                   | nonsynonymous SNV       | CERCAM:NM_016174:exon5:c.A602C:p.N201T                                   | NA | rs75750764  | B  |
| chr9 | 1.32E+08 | 1.32E+08 | T        | C        | exonic       | TBC1D13                  | nonsynonymous SNV       | TBC1D13:NM_018201:exon8:c.T569C:p.V190A                                  | NA | rs1572912   | B  |
| chr9 | 1.32E+08 | 1.32E+08 | C        | A        | UTR5         | PHYHD1                   | NA                      | NA                                                                       | NA | rs7049155   | NA |
| chr9 | 1.32E+08 | 1.32E+08 | A        | C        | exonic       | FAM73B                   | nonsynonymous SNV       | FAM73B:NM_032809:exon9:c.A923C:p.Y308S                                   | NA | NA          | B  |
| chr9 | 1.32E+08 | 1.32E+08 | G        | T        | UTR3         | PPP2R4                   | NA                      | NA                                                                       | NA | rs746489    | NA |
| chr9 | 1.32E+08 | 1.32E+08 | G        | C        | UTR3         | PPP2R4                   | NA                      | NA                                                                       | NA | rs913273    | NA |
| chr9 | 1.32E+08 | 1.32E+08 | T        | G        | UTR3         | PPP2R4                   | NA                      | NA                                                                       | NA | NA          | NA |
| chr9 | 1.32E+08 | 1.32E+08 | T        | G        | UTR3         | PPP2R4                   | NA                      | NA                                                                       | NA | NA          | NA |
| chr9 | 1.32E+08 | 1.32E+08 | C        | G        | UTR3         | PPP2R4                   | NA                      | NA                                                                       | NA | rs17459361  | NA |
| chr9 | 1.33E+08 | 1.33E+08 | AC       | -        | UTR3         | PTGES                    | NA                      | NA                                                                       | NA | NA          | NA |
| chr9 | 1.33E+08 | 1.33E+08 | T        | G        | UTR3         | TOR1B                    | NA                      | NA                                                                       | NA | rs1220509   | NA |
| chr9 | 1.33E+08 | 1.33E+08 | T        | G        | UTR3         | TOR1B                    | NA                      | NA                                                                       | NA | NA          | NA |
| chr9 | 1.33E+08 | 1.33E+08 | C        | T        | UTR3         | C9orf78                  | NA                      | NA                                                                       | NA | NA          | NA |
| chr9 | 1.33E+08 | 1.33E+08 | G        | A        | ncRNA_exonic | LOC100272217             | NA                      | NA                                                                       | NA | rs4740351   | NA |
| chr9 | 1.35E+08 | 1.35E+08 | G        | T        | UTR3         | SETX                     | NA                      | NA                                                                       | NA | rs11787894  | NA |
| chr9 | 1.36E+08 | 1.36E+08 | C        | T        | exonic       | RALGDS                   | synonymous SNV          | RALGDS:NM_001271775:exon3:c.G372A:p.V124V,RALGDS                         | NA | rs3761824   | NA |
| chr9 | 1.36E+08 | 1.36E+08 | A        | G        | UTR3         | ABO                      | NA                      | NA                                                                       | NA | NA          | NA |

|       |          |          |         |     |              |                           |                   |                                                               |                                  |             |    |
|-------|----------|----------|---------|-----|--------------|---------------------------|-------------------|---------------------------------------------------------------|----------------------------------|-------------|----|
| chr9  | 1.36E+08 | 1.36E+08 | T       | G   | UTR3         | ABO                       | NA                | NA                                                            | NA                               | rs7469752   | NA |
| chr9  | 1.36E+08 | 1.36E+08 | TGTGTG  | -   | UTR3         | CACFD1                    | NA                | NA                                                            | NA                               | NA          | NA |
| chr9  | 1.36E+08 | 1.36E+08 | C       | T   | exonic       | ADAMTSL2                  | synonymous SNV    | 01145320:exon17:c.C2436T;p.R812R,ADAMTSL2:NM_014694:exon17:   | NA                               | rs147931149 | NA |
| chr9  | 1.37E+08 | 1.37E+08 | T       | C   | UTR3         | VAV2                      | NA                | NA                                                            | NA                               | NA          | NA |
| chr9  | 1.37E+08 | 1.37E+08 | C       | -   | ncRNA_exonic | LINC00094                 | NA                | NA                                                            | NA                               | NA          | NA |
| chr9  | 1.37E+08 | 1.37E+08 | T       | G   | UTR3         | RXRA                      | NA                | NA                                                            | NA                               | NA          | NA |
| chr9  | 1.37E+08 | 1.37E+08 | C       | G   | UTR3         | RXRA                      | NA                | NA                                                            | NA                               | NA          | NA |
| chr9  | 1.38E+08 | 1.38E+08 | T       | C   | exonic       | FCN2                      | synonymous SNV    | VM_015837:exon2:c.T108C;p.R36R,FCN2:NM_004108:exon3:c.T222C;  | NA                               | rs4520243   | NA |
| chr9  | 1.38E+08 | 1.38E+08 | -       | C   | UTR3         | OBP2A                     | NA                | NA                                                            | NA                               | rs112851559 | NA |
| chr9  | 1.39E+08 | 1.39E+08 | ACACAC  | -   | UTR3         | QSOX2                     | NA                | NA                                                            | NA                               | NA          | NA |
| chr9  | 1.39E+08 | 1.39E+08 | T       | G   | exonic       | SNAPC4                    | nonsynonymous SNV | SNAPC4:NM_003086:exon17:c.A2245C;p.T749P                      | NA                               | NA          | P  |
| chr9  | 1.4E+08  | 1.4E+08  | C       | G   | exonic       | KIAA1984                  | nonsynonymous SNV | KIAA1984:NM_001039374:exon10:c.C1073G;p.A358G                 | NA                               | NA          | P  |
| chr9  | 1.4E+08  | 1.4E+08  | A       | G   | ncRNA_exonic | LOC100289341              | NA                | NA                                                            | NA                               | NA          | NA |
| chr9  | 1.4E+08  | 1.4E+08  | C       | G   | ncRNA_exonic | LOC100289341              | NA                | NA                                                            | NA                               | NA          | NA |
| chr9  | 1.4E+08  | 1.4E+08  | -       | CCG | UTR5         | TUBB4B                    | NA                | NA                                                            | NA                               | NA          | NA |
| chr9  | 1.4E+08  | 1.4E+08  | -       | G   | UTR3         | NRARP                     | NA                | NA                                                            | NA                               | rs34679617  | NA |
| chr9  | 1.41E+08 | 1.41E+08 | A       | -   | splicing     | exon1:c.284+1A>-,NM_00124 | NA                | NA                                                            | NA                               | NA          | NA |
| chr9  | 1.41E+08 | 1.41E+08 | TGTG    | -   | UTR3         | CACNA1B                   | NA                | NA                                                            | NA                               | rs72450095  | NA |
| chr9  | 1.41E+08 | 1.41E+08 | A       | C   | ncRNA_exonic | TUBBP5                    | NA                | NA                                                            | D=COSM487273;OCCURENCE=1(kidney  | rs62581043  | NA |
| chr9  | 1.41E+08 | 1.41E+08 | A       | G   | ncRNA_exonic | TUBBP5                    | NA                | NA                                                            | NA                               | rs184986292 | NA |
| chr10 | 858482   | 858482   | A       | -   | UTR3         | LARP4B                    | NA                | NA                                                            | NA                               | NA          | NA |
| chr10 | 1102868  | 1102868  | T       | C   | UTR5         | WDR37                     | NA                | NA                                                            | NA                               | rs10047382  | NA |
| chr10 | 1205784  | 1205784  | G       | A   | ncRNA_exonic | LINC00200                 | NA                | NA                                                            | NA                               | rs12762051  | NA |
| chr10 | 1205788  | 1205788  | C       | A   | ncRNA_exonic | LINC00200                 | NA                | NA                                                            | NA                               | NA          | NA |
| chr10 | 1205792  | 1205792  | G       | A   | ncRNA_exonic | LINC00200                 | NA                | NA                                                            | NA                               | rs12762059  | NA |
| chr10 | 1205801  | 1205801  | C       | A   | ncRNA_exonic | LINC00200                 | NA                | NA                                                            | NA                               | rs12763661  | NA |
| chr10 | 1228330  | 1228330  | G       | T   | UTR3         | ADARB2                    | NA                | NA                                                            | NA                               | rs1129226   | NA |
| chr10 | 3172121  | 3172121  | C       | T   | exonic       | PFKP                      | synonymous SNV    | 02627:exon17:c.C1794T;p.A598A,PFKP:NM_001242339:exon19:c.C179 | NA                               | rs1052333   | NA |
| chr10 | 3172145  | 3172145  | C       | T   | exonic       | PFKP                      | synonymous SNV    | 02627:exon17:c.C1818T;p.F606F,PFKP:NM_001242339:exon19:c.C179 | NA                               | rs1052337   | NA |
| chr10 | 3178965  | 3178968  | AATT    | -   | UTR3         | PFKP                      | NA                | NA                                                            | NA                               | rs151101324 | NA |
| chr10 | 3178986  | 3178986  | T       | C   | UTR3         | PFKP                      | NA                | NA                                                            | NA                               | rs3816712   | NA |
| chr10 | 3178987  | 3178987  | G       | A   | UTR3         | PFKP                      | NA                | NA                                                            | NA                               | rs2388564   | NA |
| chr10 | 5014488  | 5014488  | C       | T   | exonic       | AKR1C1                    | synonymous SNV    | AKR1C1:NM_001353:exon6:c.C666T;p.H222H                        | NA                               | rs13222     | NA |
| chr10 | 5903837  | 5903837  | A       | G   | UTR3         | ANKRD16                   | NA                | NA                                                            | NA                               | rs67091121  | NA |
| chr10 | 7285632  | 7285632  | A       | G   | exonic       | SFMBT2                    | synonymous SNV    | 01018039:exon9:c.T1008C;p.D336D,SFMBT2:NM_001029880:exon9:c.T | NA                               | rs2248474   | NA |
| chr10 | 7769054  | 7769054  | T       | C   | exonic       | ITIH2                     | nonsynonymous SNV | ITIH2:NM_002216:exon10:c.T1126C;p.Y376H                       | NA                               | NA          | D  |
| chr10 | 7780655  | 7780655  | G       | A   | exonic       | ITIH2                     | nonsynonymous SNV | ITIH2:NM_002216:exon16:c.G2029A;p.V677M                       | NA                               | rs188916946 | B  |
| chr10 | 16547058 | 16547058 | A       | G   | exonic       | PTER                      | synonymous SNV    | 001261836:exon4:c.A738G;p.Q246Q,PTER:NM_001001484:exon5:c.A7  | NA                               | rs7904014   | NA |
| chr10 | 17088006 | 17088006 | T       | C   | exonic       | CUBN                      | synonymous SNV    | CUBN:NM_001081:exon24:c.A3417G;p.L1139L                       | NA                               | rs1801228   | NA |
| chr10 | 17130199 | 17130199 | G       | A   | exonic       | CUBN                      | synonymous SNV    | CUBN:NM_001081:exon15:c.C1911T;p.L637L                        | NA                               | rs41289311  | NA |
| chr10 | 17270264 | 17270264 | C       | T   | UTR5         | VIM                       | NA                | NA                                                            | NA                               | NA          | NA |
| chr10 | 17839374 | 17839374 | C       | A   | UTR3         | TMEM236                   | NA                | NA                                                            | NA                               | NA          | NA |
| chr10 | 18242311 | 18242311 | A       | G   | exonic       | SLC39A12                  | nonsynonymous SNV | 1_001145195:exon2:c.A106G;p.S36G,SLC39A12:NM_152725:exon2:c.A | NA                               | rs10764176  | B  |
| chr10 | 18266989 | 18266989 | G       | A   | exonic       | SLC39A12                  | nonsynonymous SNV | _001145195:exon5:c.G910A;p.V304I,SLC39A12:NM_152725:exon5:c.C | NA                               | rs2478568   | NA |
| chr10 | 21803143 | 21803149 | AAAAAAA | -   | UTR3         | SKIDA1                    | NA                | NA                                                            | NA                               | NA          | NA |
| chr10 | 21803848 | 21803848 | -       | A   | UTR3         | SKIDA1                    | NA                | NA                                                            | NA                               | NA          | NA |
| chr10 | 21807780 | 21807780 | T       | -   | UTR5         | SKIDA1                    | NA                | NA                                                            | NA                               | rs112940679 | NA |
| chr10 | 27224492 | 27224492 | G       | C   | ncRNA_exonic | LINC00202-1               | NA                | NA                                                            | NA                               | rs11015390  | NA |
| chr10 | 30599511 | 30599511 | A       | -   | UTR3         | MTPAP                     | NA                | NA                                                            | NA                               | rs11310410  | NA |
| chr10 | 32580205 | 32580205 | C       | T   | exonic       | EPC1                      | nonsynonymous SNV | 61A:p.M287I,EPC1:NM_001272019:exon6:c.G648A;p.M216I,EPC1:NM   | NA                               | rs72789797  | P  |
| chr10 | 33165422 | 33165422 | G       | A   | UTR3         | C10orf68                  | NA                | NA                                                            | NA                               | rs12217414  | NA |
| chr10 | 33214802 | 33214802 | A       | G   | exonic       | ITGB1                     | synonymous SNV    | 83C:p.C261C,ITGB1:NM_002211:exon6:c.T783C;p.C261C,ITGB1:NM_1  | NA                               | rs2298141   | NA |
| chr10 | 35772402 | 35772402 | G       | A   | exonic       | CCNY                      | synonymous SNV    | NM_145012:exon2:c.G225A;p.T75T,CCNY:NM_181698:exon4:c.G63A;   | NA                               | rs3802509   | NA |
| chr10 | 35896957 | 35896957 | G       | A   | exonic       | GJD4                      | synonymous SNV    | GJD4:NM_153368:exon2:c.G516A;p.K172K                          | NA                               | rs595652    | NA |
| chr10 | 42832213 | 42832213 | T       | C   | ncRNA_exonic | LOC441666                 | NA                | NA                                                            | NA                               | NA          | NA |
| chr10 | 42832258 | 42832258 | C       | T   | ncRNA_exonic | LOC441666                 | NA                | NA                                                            | NA                               | rs73253652  | NA |
| chr10 | 43010627 | 43010627 | C       | T   | ncRNA_exonic | ZNF37BP                   | NA                | NA                                                            | NA                               | rs210233    | NA |
| chr10 | 43014380 | 43014380 | A       | -   | ncRNA_exonic | ZNF37BP                   | NA                | NA                                                            | NA                               | NA          | NA |
| chr10 | 43327873 | 43327873 | A       | -   | UTR3         | BMS1                      | NA                | NA                                                            | NA                               | rs112489895 | NA |
| chr10 | 44284919 | 44284919 | A       | C   | ncRNA_exonic | HNRNPA3P1                 | NA                | NA                                                            | NA                               | NA          | NA |
| chr10 | 44284934 | 44284934 | A       | C   | ncRNA_exonic | HNRNPA3P1                 | NA                | NA                                                            | NA                               | NA          | NA |
| chr10 | 45649320 | 45649320 | A       | G   | ncRNA_exonic | RSU1P2                    | NA                | NA                                                            | NA                               | rs7478624   | NA |
| chr10 | 46254783 | 46254783 | A       | G   | exonic       | FAM21C                    | synonymous SNV    | G:p.K499K,FAM21C:NM_001169106:exon17:c.A1569G;p.K523K,FAM2:   | NA                               | rs186891138 | NA |
| chr10 | 46958953 | 46958953 | A       | -   | UTR3         | SYT15                     | NA                | NA                                                            | NA                               | rs111970300 | NA |
| chr10 | 47754794 | 47754794 | C       | T   | exonic       | ANXA8L2                   | nonsynonymous SNV | ANXA8L2:NM_001630:exon5:c.C401T;p.A134V                       | NA                               | rs200976247 | D  |
| chr10 | 47915898 | 47915898 | A       | G   | exonic       | FAM21B                    | synonymous SNV    | FAM21B:NM_018232:exon15:c.A1305G;p.K435K                      | rs=COSM146931;OCCURENCE=1(stomac | rs183064568 | NA |

|       |          |          |          |          |              |            |                   |                                                               |    |             |    |
|-------|----------|----------|----------|----------|--------------|------------|-------------------|---------------------------------------------------------------|----|-------------|----|
| chr10 | 47919971 | 47919971 | G        | C        | exonic       | FAM21B     | nonsynonymous SNV | FAM21B:NM_018232:exon16:c.G1401C:p.K467N                      | NA | rs16914400  | NA |
| chr10 | 47929847 | 47929847 | C        | G        | exonic       | FAM21B     | nonsynonymous SNV | FAM21B:NM_018232:exon19:c.C1828G:p.R610G                      | NA | rs2610489   | NA |
| chr10 | 50029121 | 50029121 | C        | T        | exonic       | WDFY4      | synonymous SNV    | WDFY4:NM_020945:exon34:c.C5724T:p.H1908H                      | NA | rs79406124  | NA |
| chr10 | 50117863 | 50117863 | A        | G        | UTR3         | LRRC18     | NA                | NA                                                            | NA | rs3954099   | NA |
| chr10 | 50822192 | 50822192 | G        | C        | UTR5         | CHAT       | NA                | NA                                                            | NA | rs7903315   | NA |
| chr10 | 50830171 | 50830171 | C        | T        | exonic       | CHAT       | nonsynonymous SNV | 73T:p.L125F,CHAT:NM_020986:exon5:c.C373T:p.L125F,CHAT:NM_001  | NA | rs8178990   | P  |
| chr10 | 51486325 | 51486325 | T        | C        | UTR5         | AGAP7      | NA                | NA                                                            | NA | rs113081690 | NA |
| chr10 | 60145225 | 60145225 | T        | G        | UTR5         | TFAM       | NA                | NA                                                            | NA | NA          | NA |
| chr10 | 63955374 | 63955381 | GAAGGAAC | -        | UTR3         | RTKN2      | NA                | NA                                                            | NA | NA          | NA |
| chr10 | 65225899 | 65225899 | -        | GGCGGC   | ncRNA_exonic | JMJD1C-AS1 | NA                | NA                                                            | NA | rs3841602   | NA |
| chr10 | 70103564 | 70103564 | -        | T        | UTR3         | RUFY2      | NA                | NA                                                            | NA | rs139789920 | NA |
| chr10 | 70103597 | 70103597 | C        | A        | UTR3         | RUFY2      | NA                | NA                                                            | NA | rs1162754   | NA |
| chr10 | 70166913 | 70166913 | T        | G        | UTR5         | RUFY2      | NA                | NA                                                            | NA | rs59831114  | NA |
| chr10 | 70743494 | 70743494 | T        | A        | UTR3         | DDX21      | NA                | NA                                                            | NA | NA          | NA |
| chr10 | 70743515 | 70743515 | C        | A        | UTR3         | DDX21      | NA                | NA                                                            | NA | NA          | NA |
| chr10 | 72187716 | 72187717 | TT       | -        | UTR3         | EIF4EBP2   | NA                | NA                                                            | NA | NA          | NA |
| chr10 | 72307101 | 72307101 | C        | T        | exonic       | PALD1      | nonsynonymous SNV | PALD1:NM_014431:exon18:c.C2161T:p.R721C                       | NA | rs3740447   | D  |
| chr10 | 72357600 | 72357600 | A        | -        | UTR3         | PRF1       | NA                | NA                                                            | NA | rs34914326  | NA |
| chr10 | 72536921 | 72536921 | A        | G        | exonic       | TBATA      | synonymous SNV    | TBATA:NM_152710:exon7:c.T678C:p.D226D                         | NA | rs151019808 | NA |
| chr10 | 73050759 | 73050759 | T        | G        | exonic       | UNC5B      | nonsynonymous SNV | 01244889:exon8:c.T1154G:p.V385G,UNC5B:NM_170744:exon9:c.T11   | NA | rs117156661 | P  |
| chr10 | 73059788 | 73059788 | -        | TG       | UTR3         | UNC5B      | NA                | NA                                                            | NA | NA          | NA |
| chr10 | 73848106 | 73848106 | G        | -        | UTR5         | SPOCK2     | NA                | NA                                                            | NA | rs10713496  | NA |
| chr10 | 73992853 | 73992853 | A        | G        | exonic       | ANAPC16    | synonymous SNV    | 001242547:exon4:c.A312G:p.G104G,ANAPC16:NM_173473:exon4:c.A   | NA | NA          | NA |
| chr10 | 73992863 | 73992863 | T        | C        | exonic       | ANAPC16    | nonsynonymous SNV | _001242547:exon4:c.T322C:p.S108P,ANAPC16:NM_173473:exon4:c.T  | NA | NA          | P  |
| chr10 | 75879769 | 75879769 | -        | AA       | UTR3         | VCL        | NA                | NA                                                            | NA | NA          | NA |
| chr10 | 77158032 | 77158032 | G        | T        | UTR3         | ZNF503     | NA                | NA                                                            | NA | NA          | NA |
| chr10 | 77160058 | 77160058 | G        | A        | exonic       | ZNF503     | synonymous SNV    | ZNF503:NM_032772:exon2:c.C390T:p.P130P                        | NA | rs72807457  | NA |
| chr10 | 79551102 | 79551102 | A        | -        | UTR3         | DLG5       | NA                | NA                                                            | NA | NA          | NA |
| chr10 | 81114813 | 81114813 | C        | G        | UTR3         | PPIF       | NA                | NA                                                            | NA | rs8837      | NA |
| chr10 | 81273879 | 81273879 | A        | G        | UTR3         | EIF5A1     | NA                | NA                                                            | NA | rs1250786   | NA |
| chr10 | 81374261 | 81374261 | C        | G        | UTR3         | SFTPA1     | NA                | NA                                                            | NA | rs4253530   | NA |
| chr10 | 81374262 | 81374262 | T        | C        | UTR3         | SFTPA1     | NA                | NA                                                            | NA | rs4253531   | NA |
| chr10 | 82049251 | 82049251 | -        | TTCTTC   | UTR5         | MAT1A      | NA                | NA                                                            | NA | rs145126070 | NA |
| chr10 | 82126808 | 82126808 | C        | G        | UTR3         | DYDC2      | NA                | NA                                                            | NA | rs1047952   | NA |
| chr10 | 82192125 | 82192125 | A        | G        | UTR3         | FAM213A    | NA                | NA                                                            | NA | rs1063161   | NA |
| chr10 | 82281978 | 82281978 | T        | C        | UTR3         | TSPAN14    | NA                | NA                                                            | NA | rs1878034   | NA |
| chr10 | 88441223 | 88441223 | G        | A        | exonic       | LDB3       | nonsynonymous SNV | 001171611:exon4:c.G352A:p.V118M,LDB3:NM_007078:exon4:c.G352   | NA | rs35507268  | NA |
| chr10 | 88494810 | 88494813 | ACAC     | -        | UTR3         | LDB3       | NA                | NA                                                            | NA | NA          | NA |
| chr10 | 88810077 | 88810077 | A        | -        | UTR3         | GLUD1      | NA                | NA                                                            | NA | NA          | NA |
| chr10 | 88988555 | 88988555 | C        | T        | exonic       | NUTM2A     | synonymous SNV    | NUTM2A:NM_001099338:exon2:c.C918T:p.H306H                     | NA | rs200884340 | NA |
| chr10 | 88992622 | 88992622 | C        | T        | exonic       | NUTM2A     | synonymous SNV    | NUTM2A:NM_001099338:exon5:c.C1614T:p.P538P                    | NA | rs200484233 | NA |
| chr10 | 88992644 | 88992644 | G        | A        | exonic       | NUTM2A     | nonsynonymous SNV | NUTM2A:NM_001099338:exon5:c.G1636A:p.E546K                    | NA | rs199899922 | NA |
| chr10 | 88994452 | 88994452 | G        | A        | exonic       | NUTM2A     | nonsynonymous SNV | NUTM2A:NM_001099338:exon7:c.G2624A:p.R875H                    | NA | rs199530790 | NA |
| chr10 | 89124840 | 89124840 | C        | T        | ncRNA_exonic | NUTM2D     | NA                | NA                                                            | NA | rs200082791 | NA |
| chr10 | 89124862 | 89124862 | G        | A        | ncRNA_exonic | NUTM2D     | NA                | NA                                                            | NA | rs200907148 | B  |
| chr10 | 89127510 | 89127523 | GGACTGGC | -        | ncRNA_exonic | NUTM2D     | NA                | NA                                                            | NA | NA          | NA |
| chr10 | 89128071 | 89128071 | C        | T        | ncRNA_exonic | NUTM2D     | NA                | NA                                                            | NA | rs71237016  | NA |
| chr10 | 89506941 | 89506941 | A        | -        | UTR3         | PAPSS2     | NA                | NA                                                            | NA | NA          | NA |
| chr10 | 89619792 | 89619792 | G        | A        | UTR3         | KLLN       | NA                | NA                                                            | NA | rs113730541 | NA |
| chr10 | 90585819 | 90585819 | G        | A        | exonic       | ANKRD22    | synonymous SNV    | ANKRD22:NM_144590:exon4:c.C375T:p.G125G                       | NA | rs7893917   | NA |
| chr10 | 92660898 | 92660898 | T        | -        | UTR3         | RPP30      | NA                | NA                                                            | NA | rs59418716  | NA |
| chr10 | 92661579 | 92661579 | T        | -        | UTR3         | RPP30      | NA                | NA                                                            | NA | rs58754872  | NA |
| chr10 | 92672048 | 92672048 | -        | AA       | UTR3         | ANKRD1     | NA                | NA                                                            | NA | NA          | NA |
| chr10 | 94111658 | 94111658 | -        | GTGTGTGT | UTR3         | 5-Mar      | NA                | NA                                                            | NA | NA          | NA |
| chr10 | 99371776 | 99371776 | C        | T        | UTR3         | HOGA1      | NA                | NA                                                            | NA | rs114372258 | NA |
| chr10 | 1.01E+08 | 1.01E+08 | G        | A        | UTR5         | COX15      | NA                | NA                                                            | NA | rs2231675   | NA |
| chr10 | 1.02E+08 | 1.02E+08 | C        | T        | exonic       | PKD2L1     | nonsynonymous SNV | _001253837:exon6:c.G1036A:p.V346I,PKD2L1:NM_016112:exon6:c.G1 | NA | rs2278842   | P  |
| chr10 | 1.02E+08 | 1.02E+08 | T        | -        | UTR3         | SCD        | NA                | NA                                                            | NA | rs201898361 | NA |
| chr10 | 1.02E+08 | 1.02E+08 | T        | -        | UTR3         | HIF1AN     | NA                | NA                                                            | NA | NA          | NA |
| chr10 | 1.03E+08 | 1.03E+08 | T        | G        | UTR5         | C10orf2    | NA                | NA                                                            | NA | NA          | NA |
| chr10 | 1.03E+08 | 1.03E+08 | T        | -        | UTR3         | SFXN3      | NA                | NA                                                            | NA | rs66614203  | NA |
| chr10 | 1.04E+08 | 1.04E+08 | T        | -        | UTR3         | TMEM180    | NA                | NA                                                            | NA | NA          | NA |
| chr10 | 1.05E+08 | 1.05E+08 | -        | ATC      | UTR3         | CALHM1     | NA                | NA                                                            | NA | NA          | NA |
| chr10 | 1.12E+08 | 1.12E+08 | AA       | -        | UTR3         | ADD3       | NA                | NA                                                            | NA | rs57430745  | NA |
| chr10 | 1.13E+08 | 1.13E+08 | T        | -        | UTR3         | SHOC2      | NA                | NA                                                            | NA | NA          | NA |
| chr10 | 1.14E+08 | 1.14E+08 | T        | C        | exonic       | GPAM       | nonsynonymous SNV | v1_001244949:exon4:c.A127G:p.I43V,GPAM:NM_020918:exon4:c.A12  | NA | rs2792751   | B  |

|       |          |          |          |      |              |                              |                   |                                                                                              |             |             |    |
|-------|----------|----------|----------|------|--------------|------------------------------|-------------------|----------------------------------------------------------------------------------------------|-------------|-------------|----|
| chr10 | 1.14E+08 | 1.14E+08 | A        | G    | ncRNA_exonic | GUCY2GP                      | NA                | NA                                                                                           | NA          | rs1887136   | NA |
| chr10 | 1.15E+08 | 1.15E+08 | A        | C    | intergenic   | A(dist=36524),TCF7L2(dist=94 | NA                | NA                                                                                           | NA          | NA          | NA |
| chr10 | 1.15E+08 | 1.15E+08 | C        | -    | UTR5         | TCF7L2                       | NA                | NA                                                                                           | NA          | rs113102683 | NA |
| chr10 | 1.16E+08 | 1.16E+08 | -        | A    | UTR3         | PLEKHS1                      | NA                | NA                                                                                           | NA          | rs142169841 | NA |
| chr10 | 1.16E+08 | 1.16E+08 | A        | C    | UTR3         | PLEKHS1                      | NA                | NA                                                                                           | NA          | NA          | NA |
| chr10 | 1.16E+08 | 1.16E+08 | CC       | -    | UTR3         | PLEKHS1                      | NA                | NA                                                                                           | NA          | NA          | NA |
| chr10 | 1.16E+08 | 1.16E+08 | TCCCCAAC | -    | UTR3         | PLEKHS1                      | NA                | NA                                                                                           | NA          | NA          | NA |
| chr10 | 1.16E+08 | 1.16E+08 | TTTTT    | -    | UTR3         | ADRB1                        | NA                | NA                                                                                           | NA          | rs61645383  | NA |
| chr10 | 1.16E+08 | 1.16E+08 | A        | -    | UTR3         | TDRD1                        | NA                | NA                                                                                           | NA          | rs11316882  | NA |
| chr10 | 1.16E+08 | 1.16E+08 | G        | A    | UTR3         | AFAP1L2                      | NA                | NA                                                                                           | NA          | NA          | NA |
| chr10 | 1.16E+08 | 1.16E+08 | C        | G    | UTR5         | ABLIM1                       | NA                | NA                                                                                           | NA          | rs141394498 | NA |
| chr10 | 1.17E+08 | 1.17E+08 | T        | C    | exonic       | FAM160B1                     | synonymous SNV    | 101135051:exon14:c.T1893C:p.F631F,FAM160B1:NM_020940:exon14:                                 | NA          | rs3180654   | NA |
| chr10 | 1.18E+08 | 1.18E+08 | -        | TT   | UTR3         | GFRA1                        | NA                | NA                                                                                           | NA          | NA          | NA |
| chr10 | 1.18E+08 | 1.18E+08 | A        | -    | UTR3         | GFRA1                        | NA                | NA                                                                                           | NA          | rs144589291 | NA |
| chr10 | 1.18E+08 | 1.18E+08 | -        | G    | exonic       | PNLIPRP2                     | unknown           | UNKNOWN                                                                                      | NA          | NA          | NA |
| chr10 | 1.18E+08 | 1.18E+08 | A        | G    | UTR3         | HSPA12A                      | NA                | NA                                                                                           | NA          | rs7084566   | NA |
| chr10 | 1.19E+08 | 1.19E+08 | -        | GT   | UTR3         | VAX1                         | NA                | NA                                                                                           | NA          | rs139596848 | NA |
| chr10 | 1.19E+08 | 1.19E+08 | C        | A    | exonic       | VAX1                         | nonsynonymous SNV | 119131:exon1:c.G3T:p.M11,VAX1:NM_199131:exon1:c.G3T:p                                        | NA          | NA          | D  |
| chr10 | 1.19E+08 | 1.19E+08 | G        | A    | UTR5         | VAX1                         | NA                | NA                                                                                           | NA          | NA          | NA |
| chr10 | 1.19E+08 | 1.19E+08 | C        | A    | UTR5         | VAX1                         | NA                | NA                                                                                           | NA          | NA          | NA |
| chr10 | 1.19E+08 | 1.19E+08 | C        | A    | UTR5         | VAX1                         | NA                | NA                                                                                           | NA          | NA          | NA |
| chr10 | 1.19E+08 | 1.19E+08 | GC       | -    | UTR5         | VAX1                         | NA                | NA                                                                                           | NA          | rs71677026  | NA |
| chr10 | 1.19E+08 | 1.19E+08 | CG       | -    | UTR5         | VAX1                         | NA                | NA                                                                                           | NA          | rs148359585 | NA |
| chr10 | 1.19E+08 | 1.19E+08 | T        | C    | ncRNA_exonic | EMX2OS                       | NA                | NA                                                                                           | NA          | rs2768325   | NA |
| chr10 | 1.19E+08 | 1.19E+08 | -        | GTGT | ncRNA_exonic | EMX2OS                       | NA                | NA                                                                                           | NA          | rs111365239 | NA |
| chr10 | 1.19E+08 | 1.19E+08 | C        | G    | ncRNA_exonic | EMX2OS                       | NA                | NA                                                                                           | NA          | rs2768330   | NA |
| chr10 | 1.2E+08  | 1.2E+08  | -        | A    | UTR3         | RAB11FIP2                    | NA                | NA                                                                                           | NA          | NA          | NA |
| chr10 | 1.2E+08  | 1.2E+08  | G        | -    | UTR5         | RAB11FIP2                    | NA                | NA                                                                                           | NA          | rs67350544  | NA |
| chr10 | 1.21E+08 | 1.21E+08 | A        | -    | UTR3         | GRK5                         | NA                | NA                                                                                           | NA          | NA          | NA |
| chr10 | 1.24E+08 | 1.24E+08 | G        | T    | exonic       | TACC2                        | synonymous SNV    | 206860:exon8:c.G2121T:p.A707A,TACC2:NM_206861:exon11:c.G2325                                 | NA          | NA          | NA |
| chr10 | 1.27E+08 | 1.27E+08 | -        | T    | UTR3         | ZRANB1                       | NA                | NA                                                                                           | NA          | rs200438486 | NA |
| chr10 | 1.27E+08 | 1.27E+08 | G        | A    | UTR3         | CTBP2                        | NA                | NA                                                                                           | NA          | rs74874473  | NA |
| chr10 | 1.27E+08 | 1.27E+08 | G        | A    | UTR3         | CTBP2                        | NA                | NA                                                                                           | NA          | rs1058493   | NA |
| chr10 | 1.27E+08 | 1.27E+08 | A        | G    | UTR3         | CTBP2                        | NA                | NA                                                                                           | NA          | rs3208591   | NA |
| chr10 | 1.27E+08 | 1.27E+08 | T        | G    | UTR3         | CTBP2                        | NA                | NA                                                                                           | NA          | rs3208590   | NA |
| chr10 | 1.27E+08 | 1.27E+08 | T        | A    | UTR3         | CTBP2                        | NA                | NA                                                                                           | NA          | NA          | NA |
| chr10 | 1.27E+08 | 1.27E+08 | G        | C    | exonic       | CTBP2                        | nonsynonymous SNV | 1001083914:exon7:c.C747G:p.N249K,CTBP2:NM_001083914:exon7:c.C747G:p.N249K;OCCURENCE=1(breast | rs61870306  | D           |    |
| chr10 | 1.27E+08 | 1.27E+08 | T        | C    | exonic       | CTBP2                        | nonsynonymous SNV | 1001083914:exon7:c.A731G:p.N244S,CTBP2:NM_001083914:exon7:c.A731G:p.N244S;OCCURENCE=1(breast | rs61870307  | B           |    |
| chr10 | 1.27E+08 | 1.27E+08 | A        | C    | exonic       | CTBP2                        | nonsynonymous SNV | 1001083914:exon7:c.T695G:p.L232W,CTBP2:NM_001083914:exon7:c.T695G:p.L232W;OCCURENCE=1(breast | rs79936509  | D           |    |
| chr10 | 1.27E+08 | 1.27E+08 | C        | T    | exonic       | CTBP2                        | nonsynonymous SNV | 1001083914:exon7:c.G667A:p.V223M,CTBP2:NM_001083914:exon7:c.G667A:p.V223M;OCCURENCE=1(breast | rs76203768  | P           |    |
| chr10 | 1.27E+08 | 1.27E+08 | C        | T    | exonic       | CTBP2                        | nonsynonymous SNV | 1001083914:exon7:c.G656A:p.R219Q,CTBP2:NM_001083914:exon7:c.G656A:p.R219Q;OCCURENCE=1(breast | rs75420260  | D           |    |
| chr10 | 1.27E+08 | 1.27E+08 | C        | A    | exonic       | CTBP2                        | nonsynonymous SNV | 1001083914:exon7:c.G628T:p.D210Y,CTBP2:NM_001083914:exon7:c.G628T:p.D210Y;OCCURENCE=1(breast | rs78681531  | D           |    |
| chr10 | 1.27E+08 | 1.27E+08 | G        | C    | exonic       | CTBP2                        | nonsynonymous SNV | 1022802:exon1:c.C1615G:p.Q539E,CTBP2:NM_022802:exon1:c.C1615G:p.Q539E                        | rs2946994   | P           |    |
| chr10 | 1.27E+08 | 1.27E+08 | A        | G    | exonic       | CTBP2                        | nonsynonymous SNV | 1022802:exon1:c.T1363C:p.Y455H,CTBP2:NM_022802:exon1:c.T1363C:p.Y455H                        | rs3012075   | D           |    |
| chr10 | 1.29E+08 | 1.29E+08 | C        | A    | UTR3         | FAM196A                      | NA                | NA                                                                                           | NA          | rs74687417  | NA |
| chr10 | 1.3E+08  | 1.3E+08  | T        | C    | UTR3         | FOXI2                        | NA                | NA                                                                                           | NA          | rs4440944   | NA |
| chr10 | 1.3E+08  | 1.3E+08  | A        | T    | UTR3         | FOXI2                        | NA                | NA                                                                                           | NA          | NA          | NA |
| chr10 | 1.3E+08  | 1.3E+08  | GG       | -    | UTR3         | FOXI2                        | NA                | NA                                                                                           | NA          | NA          | NA |
| chr10 | 1.3E+08  | 1.3E+08  | A        | G    | exonic       | PTPRE                        | synonymous SNV    | 130435:exon14:c.A1380G:p.K460K,PTPRE:NM_006504:exon17:c.A155)=COSM147089;OCCURENCE=1(stomac  | rs2275803   | NA          |    |
| chr10 | 1.3E+08  | 1.3E+08  | C        | T    | UTR3         | PTPRE                        | NA                | NA                                                                                           | NA          | NA          | NA |
| chr10 | 1.34E+08 | 1.34E+08 | -        | TA   | UTR3         | STK32C                       | NA                | NA                                                                                           | NA          | rs77786797  | NA |
| chr10 | 1.34E+08 | 1.34E+08 | C        | T    | UTR5         | LRRC27                       | NA                | NA                                                                                           | NA          | rs7084379   | NA |
| chr10 | 1.34E+08 | 1.34E+08 | C        | T    | UTR3         | LRRC27                       | NA                | NA                                                                                           | NA          | rs72863837  | NA |
| chr10 | 1.34E+08 | 1.34E+08 | A        | G    | UTR3         | LRRC27                       | NA                | NA                                                                                           | NA          | rs72863838  | NA |
| chr10 | 1.35E+08 | 1.35E+08 | T        | A    | exonic       | KNDC1                        | nonsynonymous SNV | 152643:exon14:c.T2417A:p.V806D,KNDC1:NM_152643:exon14:c.T2417A:p.V806D                       | rs3008390   | B           |    |
| chr10 | 1.35E+08 | 1.35E+08 | T        | C    | exonic       | KNDC1                        | synonymous SNV    | 152643:exon14:c.T2418C:p.V806V,KNDC1:NM_152643:exon14:c.T2418C:p.V806V                       | rs3008389   | NA          |    |
| chr10 | 1.35E+08 | 1.35E+08 | T        | G    | UTR3         | KNDC1                        | NA                | NA                                                                                           | NA          | NA          | NA |
| chr10 | 1.35E+08 | 1.35E+08 | A        | C    | UTR3         | KNDC1                        | NA                | NA                                                                                           | NA          | NA          | NA |
| chr10 | 1.35E+08 | 1.35E+08 | C        | T    | ncRNA_exonic | MIR202                       | NA                | NA                                                                                           | NA          | rs12355840  | NA |
| chr10 | 1.35E+08 | 1.35E+08 | T        | C    | exonic       | SYCE1                        | nonsynonymous SNV | 1143764:exon13:c.A962G:p.H321R,SYCE1:NM_1143764:exon13:c.A962G:p.H321R                       | rs3737031   | NA          |    |
| chr10 | 1.35E+08 | 1.35E+08 | T        | G    | exonic       | FRG2B                        | nonsynonymous SNV | 1080998:exon4:c.A805C:p.T269P,FRG2B:NM_001080998:exon4:c.A805C:p.T269P                       | rs199913567 | NA          |    |
| chr10 | 1.35E+08 | 1.35E+08 | G        | C    | exonic       | FRG2B                        | nonsynonymous SNV | 1080998:exon3:c.C326G:p.T109R,FRG2B:NM_001080998:exon3:c.C326G:p.T109R                       | rs200530375 | NA          |    |
| chr10 | 1.35E+08 | 1.35E+08 | C        | T    | exonic       | FRG2B                        | synonymous SNV    | 1080998:exon2:c.G183A:p.S61S,FRG2B:NM_001080998:exon2:c.G183A:p.S61S                         | rs202189720 | NA          |    |
| chr10 | 1.35E+08 | 1.35E+08 | A        | T    | exonic       | FRG2B                        | nonsynonymous SNV | 1080998:exon1:c.T44A:p.I15N,FRG2B:NM_001080998:exon1:c.T44A:p.I15N                           | rs200661929 | NA          |    |
| chr11 | 128506   | 128506   | T        | C    | ncRNA_exonic | LOC100133161                 | NA                | NA                                                                                           | NA          | NA          | NA |
| chr11 | 237087   | 237087   | A        | G    | exonic       | PSMD13                       | nonsynonymous SNV | 175932:exon1:c.A38G:p.N13S,PSMD13:NM_175932:exon1:c.A38                                      | rs1045288   | B           |    |

|       |          |          |        |           |              |            |                         |                                                                |                                  |             |    |
|-------|----------|----------|--------|-----------|--------------|------------|-------------------------|----------------------------------------------------------------|----------------------------------|-------------|----|
| chr11 | 284257   | 284257   | G      | A         | exonic       | NLRP6      | synonymous SNV          | 01276700:exon6:c.G2226A:p.A742A,NLRP6:NM_138329:exon6:c.G22    | NA                               | rs11246050  | NA |
| chr11 | 406043   | 406043   | G      | A         | exonic       | SIGIRR     | synonymous SNV          | 6T:p.V362V,SIGIRR:NM_001135054:exon10:c.C1086T:p.V362V,SIGIRR: | NA                               | rs7947      | NA |
| chr11 | 574754   | 574754   | C      | T         | ncRNA_exonic | LOC143666  | NA                      | NA                                                             | NA                               | rs12285890  | NA |
| chr11 | 574800   | 574800   | C      | A         | ncRNA_exonic | LOC143666  | NA                      | NA                                                             | NA                               | NA          | NA |
| chr11 | 574813   | 574813   | C      | A         | ncRNA_exonic | LOC143666  | NA                      | NA                                                             | NA                               | rs12285942  | NA |
| chr11 | 611919   | 611919   | C      | G         | UTR3         | PHRF1      | NA                      | NA                                                             | NA                               | rs702966    | NA |
| chr11 | 621227   | 621227   | T      | G         | exonic       | CDHR5      | nonsynonymous SNV       | 642C:p.E214D,CDHR5:NM_021924:exon7:c.A642C:p.E214D,CDHR5:NM    | NA                               | NA          | P  |
| chr11 | 795097   | 795097   | T      | G         | UTR5         | SLC25A22   | NA                      | NA                                                             | NA                               | NA          | NA |
| chr11 | 838760   | 838760   | T      | A         | UTR3         | CD151      | NA                      | NA                                                             | NA                               | rs1130719   | NA |
| chr11 | 1016067  | 1016067  | G      | C         | exonic       | MUC6       | nonsynonymous SNV       | MUC6:NM_005961:exon31:c.C6734G:p.T2245S                        | NA                               | NA          | NA |
| chr11 | 1016074  | 1016074  | A      | T         | exonic       | MUC6       | nonsynonymous SNV       | MUC6:NM_005961:exon31:c.T6727A:p.S2243T                        | NA                               | NA          | NA |
| chr11 | 1016704  | 1016704  | C      | A         | exonic       | MUC6       | nonsynonymous SNV       | MUC6:NM_005961:exon31:c.G6097T:p.A2033S                        | NA                               | rs75826443  | NA |
| chr11 | 1016842  | 1016842  | T      | G         | exonic       | MUC6       | nonsynonymous SNV       | MUC6:NM_005961:exon31:c.A5959C:p.T1987P                        | NA                               | rs34490696  | NA |
| chr11 | 1017154  | 1017154  | T      | G         | exonic       | MUC6       | nonsynonymous SNV       | MUC6:NM_005961:exon31:c.A5647C:p.I1883L                        | NA                               | rs112965257 | NA |
| chr11 | 1017158  | 1017158  | G      | T         | exonic       | MUC6       | synonymous SNV          | MUC6:NM_005961:exon31:c.C5643A:p.T1881T                        | NA                               | rs36143620  | NA |
| chr11 | 1017317  | 1017317  | G      | T         | exonic       | MUC6       | synonymous SNV          | MUC6:NM_005961:exon31:c.C5484A:p.T1828T                        | NA                               | rs33943903  | NA |
| chr11 | 1017337  | 1017337  | T      | C         | exonic       | MUC6       | nonsynonymous SNV       | MUC6:NM_005961:exon31:c.A5464G:p.T1822A                        | NA                               | rs76686156  | NA |
| chr11 | 1017338  | 1017338  | C      | A         | exonic       | MUC6       | nonsynonymous SNV       | MUC6:NM_005961:exon31:c.G5463T:p.Q1821H                        | NA                               | rs78943453  | NA |
| chr11 | 1018168  | 1018170  | TCG    | -         | exonic       | MUC6       | nonframeshift deletion  | MUC6:NM_005961:exon31:c.4631_4633del:p.1544_1545del            | NA                               | rs111749447 | NA |
| chr11 | 1018304  | 1018304  | G      | C         | exonic       | MUC6       | synonymous SNV          | MUC6:NM_005961:exon31:c.C4497G:p.A1499A                        | NA                               | rs113835477 | NA |
| chr11 | 1081757  | 1081757  | G      | C         | exonic       | MUC2       | nonsynonymous SNV       | MUC2:NM_002457:exon13:c.G1685C:p.S562T                         | NA                               | rs57737240  | NA |
| chr11 | 1093487  | 1093487  | T      | C         | exonic       | MUC2       | nonsynonymous SNV       | MUC2:NM_002457:exon30:c.T5306C:p.L1769P                        | NA                               | NA          | NA |
| chr11 | 1264058  | 1264058  | T      | C         | exonic       | MUC5B      | nonsynonymous SNV       | MUC5B:NM_002458:exon31:c.T5948C:p.I1983T                       | NA                               | NA          | NA |
| chr11 | 1264069  | 1264069  | T      | C         | exonic       | MUC5B      | nonsynonymous SNV       | MUC5B:NM_002458:exon31:c.T5959C:p.S1987P                       | NA                               | NA          | NA |
| chr11 | 1264631  | 1264631  | A      | G         | exonic       | MUC5B      | nonsynonymous SNV       | MUC5B:NM_002458:exon31:c.A6521G:p.N2174S                       | =COSM1127860;OCCURENCE=1(prostat | rs56726556  | NA |
| chr11 | 1264717  | 1264717  | C      | T         | exonic       | MUC5B      | nonsynonymous SNV       | MUC5B:NM_002458:exon31:c.C6607T:p.P2203S                       | M1146630,COSM687359;OCCURENCE=   | rs200947535 | NA |
| chr11 | 1575443  | 1575443  | T      | C         | UTR3         | DUSP8      | NA                      | NA                                                             | NA                               | NA          | NA |
| chr11 | 1605904  | 1605904  | T      | G         | exonic       | KRTAP5-1   | synonymous SNV          | KRTAP5-1:NM_001005922:exon1:c.A576C:p.G192G                    | NA                               | rs113408385 | NA |
| chr11 | 1606147  | 1606147  | A      | G         | exonic       | KRTAP5-1   | synonymous SNV          | KRTAP5-1:NM_001005922:exon1:c.T333C:p.S111S                    | NA                               | rs138363822 | NA |
| chr11 | 1629373  | 1629373  | T      | G         | exonic       | KRTAP5-3   | synonymous SNV          | KRTAP5-3:NM_001012708:exon1:c.A243C:p.G81G                     | NA                               | NA          | NA |
| chr11 | 1642305  | 1642305  | T      | G         | UTR3         | KRTAP5-4   | NA                      | NA                                                             | NA                               | NA          | NA |
| chr11 | 1651199  | 1651199  | -      | iCTGTGGCT | exonic       | KRTAP5-5   | nonframeshift insertion | 5-5:NM_001001480:exon1:c.129_130insGGCTGTGGCTCC:p.G43delins    | NA                               | NA          | NA |
| chr11 | 1687684  | 1687684  | G      | C         | ncRNA_exonic | FAM99A     | NA                      | NA                                                             | NA                               | rs202130518 | NA |
| chr11 | 2011144  | 2011144  | T      | C         | ncRNA_exonic | MRPL23-AS1 | NA                      | NA                                                             | NA                               | rs217716    | NA |
| chr11 | 2292139  | 2292139  | A      | C         | UTR5         | ASCL2      | NA                      | NA                                                             | NA                               | NA          | NA |
| chr11 | 2435956  | 2435956  | C      | T         | exonic       | TRPM5      | nonsynonymous SNV       | TRPM5:NM_014555:exon11:c.G1733A:p.R578Q                        | NA                               | rs4929982   | NA |
| chr11 | 2672192  | 2672195  | ATCT   | -         | ncRNA_exonic | KCNQ1OT1   | NA                      | NA                                                             | NA                               | rs143246270 | NA |
| chr11 | 2672237  | 2672237  | G      | A         | ncRNA_exonic | KCNQ1OT1   | NA                      | NA                                                             | NA                               | rs170762    | NA |
| chr11 | 2672432  | 2672432  | -      | A         | ncRNA_exonic | KCNQ1OT1   | NA                      | NA                                                             | NA                               | rs34514246  | NA |
| chr11 | 2699252  | 2699252  | -      | T         | ncRNA_exonic | KCNQ1OT1   | NA                      | NA                                                             | NA                               | NA          | NA |
| chr11 | 2701076  | 2701076  | C      | A         | ncRNA_exonic | KCNQ1OT1   | NA                      | NA                                                             | NA                               | NA          | NA |
| chr11 | 2720899  | 2720899  | G      | C         | ncRNA_exonic | KCNQ1OT1   | NA                      | NA                                                             | ID=COSN217036;OCCURENCE=2(liver) | rs145762501 | NA |
| chr11 | 2924850  | 2924850  | -      | C         | UTR5         | SLC22A18AS | NA                      | NA                                                             | NA                               | NA          | NA |
| chr11 | 3663273  | 3663273  | C      | T         | UTR5         | ART5       | NA                      | NA                                                             | NA                               | rs7112533   | NA |
| chr11 | 3877114  | 3877118  | TCTCT  | -         | UTR5         | STIM1      | NA                      | NA                                                             | NA                               | rs147711952 | NA |
| chr11 | 4141132  | 4141132  | C      | A         | exonic       | RRM1       | synonymous SNV          | RRM1:NM_001033:exon9:c.C850A:p.R284R                           | NA                               | rs183484    | NA |
| chr11 | 5269586  | 5269586  | A      | G         | UTR3         | HBG1       | NA                      | NA                                                             | NA                               | rs62755960  | NA |
| chr11 | 6239344  | 6239344  | G      | A         | exonic       | FAM160A2   | nonsynonymous SNV       | 01098794:exon9:c.C1472T:p.T491M,FAM160A2:NM_032127:exon9:c.    | NA                               | rs3750944   | B  |
| chr11 | 6411935  | 6411935  | T      | C         | exonic       | SMPD1      | nonsynonymous SNV       | 1_000543:exon1:c.T107C:p.V36A,SMPD1:NM_001007593:exon1:c.T10   | NA                               | rs1050228   | NA |
| chr11 | 6411936  | 6411941  | GCTGGC | -         | exonic       | SMPD1      | nonframeshift deletion  | :exon1:c.108_113del:p.36_38del,SMPD1:NM_001007593:exon1:c.108  | NA                               | rs3838786   | NA |
| chr11 | 6549995  | 6549995  | A      | G         | exonic       | DNHD1      | nonsynonymous SNV       | DNHD1:NM_144666:exon11:c.A2081G:p.N694S                        | NA                               | rs7480644   | NA |
| chr11 | 8009107  | 8009107  | G      | T         | exonic       | EIF3F      | nonsynonymous SNV       | EIF3F:NM_003754:exon1:c.G208T:p.A70S                           | NA                               | NA          | NA |
| chr11 | 8708939  | 8708939  | A      | C         | UTR3         | RPL27A     | NA                      | NA                                                             | NA                               | rs1057198   | NA |
| chr11 | 9003014  | 9003014  | A      | -         | UTR3         | NRIP3      | NA                      | NA                                                             | NA                               | rs10714611  | NA |
| chr11 | 9051475  | 9051475  | G      | C         | exonic       | SCUBE2     | nonsynonymous SNV       | 01170690:exon15:c.C1994G:p.T665S,SCUBE2:NM_020974:exon18:c.C.  | NA                               | rs3751057   | D  |
| chr11 | 9117694  | 9117694  | T      | -         | ncRNA_exonic | KRT8P41    | NA                      | NA                                                             | NA                               | NA          | NA |
| chr11 | 10772951 | 10772951 | G      | T         | UTR5         | CTR9       | NA                      | NA                                                             | NA                               | NA          | NA |
| chr11 | 11985134 | 11985139 | TTTACT | -         | UTR3         | DKK3       | NA                      | NA                                                             | NA                               | rs142843448 | NA |
| chr11 | 12316389 | 12316389 | A      | C         | exonic       | MICALCL    | nonsynonymous SNV       | MICALCL:NM_032867:exon3:c.A1411C:p.T471P                       | NA                               | rs3812754   | B  |
| chr11 | 13031253 | 13031253 | C      | A         | exonic       | RASSF10    | synonymous SNV          | RASSF10:NM_001080521:exon1:c.C130A:p.R44R                      | NA                               | rs61879068  | NA |
| chr11 | 15268574 | 15268574 | T      | -         | UTR3         | INSC       | NA                      | NA                                                             | NA                               | NA          | NA |
| chr11 | 15990619 | 15990619 | A      | -         | UTR3         | SOX6       | NA                      | NA                                                             | NA                               | NA          | NA |
| chr11 | 16778455 | 16778455 | -      | A         | UTR3         | C11orf58   | NA                      | NA                                                             | NA                               | NA          | NA |
| chr11 | 17519742 | 17519742 | C      | G         | exonic       | USH1C      | nonsynonymous SNV       | 005709:exon19:c.G1557C:p.E519D,USH1C:NM_153676:exon24:c.G24!   | NA                               | rs1064074   | P  |
| chr11 | 17743207 | 17743207 | G      | C         | UTR3         | MYOD1      | NA                      | NA                                                             | NA                               | NA          | NA |
| chr11 | 18234755 | 18234755 | G      | A         | ncRNA_exonic | LOC494141  | NA                      | NA                                                             | NA                               | rs11024553  | NA |

|       |          |          |      |           |              |            |                   |                                                                |                                 |             |    |
|-------|----------|----------|------|-----------|--------------|------------|-------------------|----------------------------------------------------------------|---------------------------------|-------------|----|
| chr11 | 18388442 | 18388442 | A    | -         | UTR3         | GTF2H1     | NA                | NA                                                             | NA                              | NA          | NA |
| chr11 | 20623023 | 20623023 | C    | T         | exonic       | SLC6A5     | synonymous SNV    | SLC6A5:NM_004211:exon2:c.C352T:p.L118L                         | NA                              | rs2241941   | NA |
| chr11 | 22401038 | 22401038 | T    | -         | UTR3         | SLC17A6    | NA                | NA                                                             | NA                              | rs35743767  | NA |
| chr11 | 26581382 | 26581382 | -    | AC        | UTR3         | MUC15      | NA                | NA                                                             | NA                              | NA          | NA |
| chr11 | 26690702 | 26690702 | C    | T         | UTR3         | SLC5A12    | NA                | NA                                                             | NA                              | rs76831336  | NA |
| chr11 | 26690715 | 26690718 | TTTC | -         | UTR3         | SLC5A12    | NA                | NA                                                             | NA                              | rs138812062 | NA |
| chr11 | 26692594 | 26692594 | -    | TGTGTGTG  | UTR3         | SLC5A12    | NA                | NA                                                             | NA                              | NA          | NA |
| chr11 | 26705307 | 26705307 | C    | A         | exonic       | SLC5A12    | nonsynonymous SNV | SLC5A12:NM_178498:exon11:c.G1305T:p.W435C                      | NA                              | NA          | D  |
| chr11 | 27360070 | 27360070 | T    | C         | UTR3         | CCDC34     | NA                | NA                                                             | NA                              | rs79626653  | NA |
| chr11 | 28354102 | 28354102 | T    | A         | UTR3         | METTL15    | NA                | NA                                                             | NA                              | rs142327989 | NA |
| chr11 | 31453369 | 31453369 | T    | A         | UTR3         | DNAJC24    | NA                | NA                                                             | NA                              | rs12362759  | NA |
| chr11 | 32875597 | 32875597 | T    | C         | UTR3         | PRRG4      | NA                | NA                                                             | NA                              | rs7933966   | NA |
| chr11 | 33094949 | 33094949 | -    | CTTTGACTT | UTR3         | TCP11L1    | NA                | NA                                                             | NA                              | NA          | NA |
| chr11 | 33730147 | 33730147 | A    | -         | UTR3         | CD59       | NA                | NA                                                             | NA                              | NA          | NA |
| chr11 | 34502345 | 34502345 | T    | C         | exonic       | ELF5       | synonymous SNV    | VI_001243081:exon5:c.A441G:p.T147T,ELF5:NM_001422:exon6:c.A64! | NA                              | rs2231828   | NA |
| chr11 | 34642668 | 34642668 | A    | G         | UTR5         | EHF        | NA                | NA                                                             | NA                              | rs286925    | NA |
| chr11 | 34642728 | 34642728 | A    | T         | UTR5         | EHF        | NA                | NA                                                             | NA                              | rs286924    | NA |
| chr11 | 35201842 | 35201842 | C    | T         | exonic       | CD44       | synonymous SNV    | iT:p.H85H,CD44:NM_001001391:exon3:c.C255T:p.H85H,CD44:NM_00    | NA                              | rs1071695   | NA |
| chr11 | 35280491 | 35280492 | AA   | -         | UTR3         | SLC1A2     | NA                | NA                                                             | NA                              | NA          | NA |
| chr11 | 43940644 | 43940644 | G    | T         | exonic       | ALKBH3     | synonymous SNV    | ALKBH3:NM_139178:exon9:c.G726T:p.G242G                         | NA                              | rs1048928   | NA |
| chr11 | 46342943 | 46342943 | A    | -         | UTR3         | CREB3L1    | NA                | NA                                                             | NA                              | NA          | NA |
| chr11 | 46699495 | 46699495 | A    | -         | UTR3         | ARHGAP1    | NA                | NA                                                             | NA                              | rs34845803  | NA |
| chr11 | 48192308 | 48192308 | C    | T         | UTR3         | PTPRJ      | NA                | NA                                                             | NA                              | rs199522084 | NA |
| chr11 | 48192308 | 48192308 | -    | T         | UTR3         | PTPRJ      | NA                | NA                                                             | NA                              | rs11389144  | NA |
| chr11 | 48373748 | 48373748 | C    | G         | exonic       | OR4C45     | unknown           | UNKNOWN                                                        | ID=COSN229011;OCCURENCE=1(skin) | rs73453188  | NA |
| chr11 | 48373827 | 48373827 | G    | A         | exonic       | OR4C45     | unknown           | UNKNOWN                                                        | NA                              | rs80081241  | NA |
| chr11 | 48373833 | 48373833 | G    | A         | exonic       | OR4C45     | unknown           | UNKNOWN                                                        | NA                              | rs75965588  | NA |
| chr11 | 48373834 | 48373834 | A    | G         | exonic       | OR4C45     | unknown           | UNKNOWN                                                        | NA                              | rs75261463  | NA |
| chr11 | 57313469 | 57313469 | C    | G         | exonic       | SMTNL1     | nonsynonymous SNV | SMTNL1:NM_001105565:exon4:c.C1033G:p.R345G                     | NA                              | rs12223229  | NA |
| chr11 | 57479502 | 57479502 | C    | G         | exonic       | MED19      | synonymous SNV    | MED19:NM_153450:exon1:c.G150C:p.T50T                           | NA                              | NA          | NA |
| chr11 | 59341901 | 59341901 | T    | -         | UTR3         | OSBP       | NA                | NA                                                             | NA                              | NA          | NA |
| chr11 | 59383241 | 59383241 | C    | A         | UTR5         | OSBP       | NA                | NA                                                             | NA                              | NA          | NA |
| chr11 | 59863498 | 59863498 | T    | -         | UTR3         | MS4A2      | NA                | NA                                                             | NA                              | rs5792168   | NA |
| chr11 | 60971694 | 60971694 | A    | G         | exonic       | PGA3       | nonsynonymous SNV | PGA3:NM_001079807:exon2:c.A172G:p.K58E                         | NA                              | rs117494851 | B  |
| chr11 | 61405617 | 61405617 | G    | A         | ncRNA_exonic | RPLP0P2    | NA                | NA                                                             | NA                              | NA          | NA |
| chr11 | 61560399 | 61560399 | A    | C         | UTR5         | FEN1       | NA                | NA                                                             | NA                              | NA          | NA |
| chr11 | 61569354 | 61569354 | -    | T         | UTR3         | FADS1      | NA                | NA                                                             | NA                              | rs34397549  | NA |
| chr11 | 62294717 | 62294717 | A    | T         | exonic       | AHNAK      | nonsynonymous SNV | AHNAK:NM_001620:exon5:c.T7172A:p.L2391H                        | NA                              | NA          | P  |
| chr11 | 62360961 | 62360961 | T    | C         | UTR3         | MTA2       | NA                | NA                                                             | NA                              | NA          | NA |
| chr11 | 62378801 | 62378801 | T    | C         | exonic       | EML3       | synonymous SNV    | EML3:NM_153265:exon3:c.A210G:p.P70P                            | NA                              | rs11553576  | NA |
| chr11 | 62434173 | 62434173 | G    | A         | exonic       | METTL12    | nonsynonymous SNV | METTL12:NM_001043229:exon3:c.G373A:p.G125S                     | NA                              | rs11231181  | B  |
| chr11 | 62453952 | 62453952 | G    | A         | UTR3         | LRRN4CL    | NA                | NA                                                             | NA                              | rs2512561   | NA |
| chr11 | 62766507 | 62766507 | T    | A         | exonic       | SLC22A8    | nonsynonymous SNV | _001184732:exon5:c.A647T:p.Y216F,SLC22A8:NM_001184733:exon5:c  | NA                              | NA          | B  |
| chr11 | 62766508 | 62766508 | A    | T         | exonic       | SLC22A8    | nonsynonymous SNV | _001184732:exon5:c.T646A:p.Y216N,SLC22A8:NM_001184733:exon5:c  | NA                              | NA          | D  |
| chr11 | 62766510 | 62766510 | C    | G         | exonic       | SLC22A8    | nonsynonymous SNV | 001184732:exon5:c.G644C:p.G215A,SLC22A8:NM_001184733:exon5:c   | NA                              | NA          | D  |
| chr11 | 62766511 | 62766511 | C    | G         | exonic       | SLC22A8    | nonsynonymous SNV | 001184732:exon5:c.G643C:p.G215R,SLC22A8:NM_001184733:exon5:c   | NA                              | NA          | D  |
| chr11 | 62766512 | 62766512 | G    | A         | exonic       | SLC22A8    | synonymous SNV    | _001184732:exon5:c.C642T:p.L214L,SLC22A8:NM_001184733:exon5:c  | NA                              | NA          | NA |
| chr11 | 64107735 | 64107735 | G    | A         | UTR5         | CCDC88B    | NA                | NA                                                             | NA                              | rs663743    | NA |
| chr11 | 64137079 | 64137079 | C    | A         | exonic       | RPS6KA4    | nonsynonymous SNV | 01006944:exon13:c.C1572A:p.D524E,RPS6KA4:NM_003942:exon13:c.(  | NA                              | NA          | D  |
| chr11 | 64138805 | 64138805 | T    | C         | exonic       | RPS6KA4    | synonymous SNV    | 01006944:exon17:c.T2154C:p.N718N,RPS6KA4:NM_003942:exon17:c.1  | NA                              | rs11542299  | NA |
| chr11 | 64577370 | 64577370 | G    | A         | exonic       | MEN1       | nonsynonymous SNV | C212T:p.P71L,MEN1:NM_130801:exon2:c.C212T:p.P71L,MEN1:NM_13    | NA                              | NA          | D  |
| chr11 | 64794918 | 64794918 | -    | G         | ncRNA_exonic | ARL2-SNX15 | NA                | NA                                                             | NA                              | rs3832791   | NA |
| chr11 | 64807447 | 64807447 | A    | C         | ncRNA_exonic | ARL2-SNX15 | NA                | NA                                                             | NA                              | rs664118    | NA |
| chr11 | 64988520 | 64988520 | T    | G         | intronic     | SLC22A20   | NA                | NA                                                             | NA                              | NA          | NA |
| chr11 | 64990041 | 64990041 | G    | C         | exonic       | SLC22A20   | nonsynonymous SNV | SLC22A20:NM_001004326:exon4:c.G737C:p.G246A                    | NA                              | rs514076    | NA |
| chr11 | 65403717 | 65403717 | T    | G         | exonic       | PCNXL3     | synonymous SNV    | PCNXL3:NM_032223:exon33:c.T5532G:p.G1844G                      | NA                              | NA          | NA |
| chr11 | 65764798 | 65764798 | A    | -         | UTR3         | EIF1AD     | NA                | NA                                                             | NA                              | NA          | NA |
| chr11 | 66035287 | 66035287 | A    | -         | UTR3         | KLC2       | NA                | NA                                                             | NA                              | rs5792385   | NA |
| chr11 | 66393035 | 66393035 | A    | G         | exonic       | RBM14      | nonsynonymous SNV | RBM14:NM_006328:exon2:c.A1688G:p.Q563R                         | NA                              | NA          | NA |
| chr11 | 66452843 | 66452843 | T    | G         | UTR3         | SPTBN2     | NA                | NA                                                             | NA                              | NA          | NA |
| chr11 | 66452849 | 66452849 | T    | G         | UTR3         | SPTBN2     | NA                | NA                                                             | NA                              | NA          | NA |
| chr11 | 67415054 | 67415054 | C    | T         | UTR5         | ACY3       | NA                | NA                                                             | NA                              | rs2514036   | NA |
| chr11 | 67572698 | 67572698 | G    | T         | ncRNA_exonic | FAM86C2P   | NA                | NA                                                             | NA                              | rs7129283   | NA |
| chr11 | 67924559 | 67924559 | A    | -         | UTR3         | SUV420H1   | NA                | NA                                                             | NA                              | NA          | NA |
| chr11 | 67924560 | 67924560 | T    | G         | UTR3         | SUV420H1   | NA                | NA                                                             | NA                              | NA          | NA |
| chr11 | 68381367 | 68381367 | T    | -         | UTR3         | PPP6R3     | NA                | NA                                                             | NA                              | NA          | NA |



|       |          |          |          |        |          |                            |                      |                                                                |                                 |             |    |
|-------|----------|----------|----------|--------|----------|----------------------------|----------------------|----------------------------------------------------------------|---------------------------------|-------------|----|
| chr11 | 68816370 | 68816370 | A        | G      | UTR5     | TPCN2                      | NA                   | NA                                                             | NA                              | rs4930642   | NA |
| chr11 | 68856711 | 68856716 | AATAAC   | -      | UTR3     | TPCN2                      | NA                   | NA                                                             | NA                              | rs150950408 | NA |
| chr11 | 70281360 | 70281363 | TTTT     | -      | UTR3     | CTTN                       | NA                   | NA                                                             | NA                              | NA          | NA |
| chr11 | 70315627 | 70315627 | -        | T      | UTR3     | SHANK2                     | NA                   | NA                                                             | NA                              | NA          | NA |
| chr11 | 71146249 | 71146260 | CAAGGAAC | -      | UTR3     | DHCR7                      | NA                   | NA                                                             | NA                              | rs141483210 | NA |
| chr11 | 71708250 | 71708253 | GTGT     | -      | UTR3     | RNF121                     | NA                   | NA                                                             | NA                              | NA          | NA |
| chr11 | 72290629 | 72290629 | G        | A      | exonic   | PDE2A                      | synonymous SNV       | .001243784:exon26:c.C2142T;p.I714I,PDE2A:NM_002599:exon26:c.C2 | NA                              | rs392565    | NA |
| chr11 | 72385393 | 72385393 | A        | C      | UTR5     | PDE2A                      | NA                   | NA                                                             | NA                              | NA          | NA |
| chr11 | 72385400 | 72385400 | T        | C      | UTR5     | PDE2A                      | NA                   | NA                                                             | NA                              | NA          | NA |
| chr11 | 73670645 | 73670645 | T        | C      | exonic   | DNAJB13                    | synonymous SNV       | DNAJB13:NM_153614:exon3:c.T279C;p.H93H                         | NA                              | rs653263    | NA |
| chr11 | 74042308 | 74042308 | C        | T      | UTR3     | PGM2L1                     | NA                   | NA                                                             | NA                              | NA          | NA |
| chr11 | 74042308 | 74042308 | -        | TTT    | UTR3     | PGM2L1                     | NA                   | NA                                                             | NA                              | NA          | NA |
| chr11 | 74045953 | 74045953 | T        | -      | UTR3     | PGM2L1                     | NA                   | NA                                                             | NA                              | rs34926765  | NA |
| chr11 | 74551831 | 74551831 | A        | C      | UTR3     | RNF169                     | NA                   | NA                                                             | NA                              | rs200744330 | NA |
| chr11 | 76372180 | 76372180 | T        | G      | exonic   | LRRC32                     | nonsynonymous SNV    | .001128922:exon3:c.A457C;p.T153P,LRRC32:NM_005512:exon3:c.A4   | NA                              | NA          | B  |
| chr11 | 76372193 | 76372193 | T        | G      | exonic   | LRRC32                     | synonymous SNV       | .001128922:exon3:c.A444C;p.A148A,LRRC32:NM_005512:exon3:c.A4   | NA                              | NA          | NA |
| chr11 | 76751585 | 76751585 | T        | -      | splicing | exon3:c.988+1T>-,NM_1387   | NA                   | NA                                                             | NA                              | rs11292199  | NA |
| chr11 | 76751604 | 76751604 | T        | -      | splicing | exon4:c.1006+1T>-,NM_1387  | NA                   | NA                                                             | NA                              | rs11292200  | NA |
| chr11 | 76836661 | 76836662 | TA       | -      | UTR3     | CAPN5                      | NA                   | NA                                                             | NA                              | rs10543158  | NA |
| chr11 | 76954788 | 76954788 | -        | A      | exonic   | GDPD4                      | frameshift insertion | GDPD4:NM_182833:exon12:c.1192_1193insT;p.I398fs                | NA                              | NA          | NA |
| chr11 | 89059054 | 89059055 | TA       | -      | UTR3     | NOX4                       | NA                   | NA                                                             | NA                              | NA          | NA |
| chr11 | 89392653 | 89392653 | A        | G      | UTR5     | FOLH1B                     | NA                   | NA                                                             | NA                              | rs10765230  | NA |
| chr11 | 89531619 | 89531619 | A        | G      | exonic   | TRIM49                     | synonymous SNV       | TRIM49:NM_020358:exon8:c.T1038C;p.H346H                        | NA                              | rs11824402  | NA |
| chr11 | 94150790 | 94150790 | T        | C      | UTR3     | MRE11A                     | NA                   | NA                                                             | NA                              | rs2155209   | NA |
| chr11 | 94803971 | 94803971 | C        | T      | UTR3     | SRSF8                      | NA                   | NA                                                             | NA                              | rs61895522  | NA |
| chr11 | 94863499 | 94863499 | G        | T      | UTR3     | ENDOD1                     | NA                   | NA                                                             | NA                              | rs500849    | NA |
| chr11 | 96126289 | 96126289 | T        | -      | UTR3     | JRKL                       | NA                   | NA                                                             | NA                              | rs201157332 | NA |
| chr11 | 99690286 | 99690286 | T        | G      | exonic   | CNTN5                      | nonsynonymous SNV    | .T67G;p.S23A,CNTN5:NM_001243271:exon4:c.T67G;p.S23A,CNTN5:NI   | NA                              | rs10790978  | NA |
| chr11 | 1.02E+08 | 1.02E+08 | G        | A      | UTR3     | KIAA1377                   | NA                   | NA                                                             | NA                              | NA          | NA |
| chr11 | 1.03E+08 | 1.03E+08 | C        | A      | UTR5     | MMP27                      | NA                   | NA                                                             | NA                              | rs11225389  | NA |
| chr11 | 1.03E+08 | 1.03E+08 | A        | G      | UTR3     | DCUN1D5                    | NA                   | NA                                                             | NA                              | NA          | NA |
| chr11 | 1.03E+08 | 1.03E+08 | T        | G      | UTR3     | DCUN1D5                    | NA                   | NA                                                             | NA                              | NA          | NA |
| chr11 | 1.03E+08 | 1.03E+08 | C        | A      | UTR3     | DCUN1D5                    | NA                   | NA                                                             | NA                              | NA          | NA |
| chr11 | 1.05E+08 | 1.05E+08 | T        | -      | exonic   | CASP5                      | frameshift deletion  | .001136112:exon2:c.67delA;p.R23fs,CASP5:NM_004347:exon2:c.28d  | NA                              | NA          | NA |
| chr11 | 1.05E+08 | 1.05E+08 | TTT      | -      | UTR5     | GRIA4                      | NA                   | NA                                                             | NA                              | NA          | NA |
| chr11 | 1.06E+08 | 1.06E+08 | -        | A      | UTR3     | GRIA4                      | NA                   | NA                                                             | NA                              | NA          | NA |
| chr11 | 1.06E+08 | 1.06E+08 | -        | CACACA | UTR3     | GRIA4                      | NA                   | NA                                                             | NA                              | NA          | NA |
| chr11 | 1.08E+08 | 1.08E+08 | A        | G      | UTR3     | SLC35F2                    | NA                   | NA                                                             | NA                              | rs4754259   | NA |
| chr11 | 1.08E+08 | 1.08E+08 | TT       | -      | UTR3     | CUL5                       | NA                   | NA                                                             | NA                              | NA          | NA |
| chr11 | 1.08E+08 | 1.08E+08 | G        | A      | UTR5     | ATM                        | NA                   | NA                                                             | NA                              | rs189037    | NA |
| chr11 | 1.08E+08 | 1.08E+08 | T        | C      | exonic   | EXPH5                      | nonsynonymous SNV    | EXPH5:NM_015065:exon1:c.A55G;p.R19G                            | )=COSM147323;OCCURENCE=1(stomac | rs2640738   | D  |
| chr11 | 1.1E+08  | 1.1E+08  | A        | C      | UTR3     | FDX1                       | NA                   | NA                                                             | NA                              | rs4753894   | NA |
| chr11 | 1.11E+08 | 1.11E+08 | -        | AGGA   | UTR3     | POU2AF1                    | NA                   | NA                                                             | NA                              | NA          | NA |
| chr11 | 1.11E+08 | 1.11E+08 | -        | AAGAAG | UTR3     | POU2AF1                    | NA                   | NA                                                             | NA                              | NA          | NA |
| chr11 | 1.12E+08 | 1.12E+08 | G        | -      | splicing | on3:c.61-1C>-,NM_00107769( | NA                   | NA                                                             | NA                              | rs10708475  | NA |
| chr11 | 1.13E+08 | 1.13E+08 | -        | G      | UTR5     | NCAM1                      | NA                   | NA                                                             | NA                              | rs145493999 | NA |
| chr11 | 1.14E+08 | 1.14E+08 | G        | A      | UTR3     | USP28                      | NA                   | NA                                                             | NA                              | NA          | NA |
| chr11 | 1.17E+08 | 1.17E+08 | C        | G      | exonic   | BACE1                      | synonymous SNV       | L:NM_012104:exon5:c.G786C;p.V262V,BACE1:NM_138971:exon5:c.G6   | NA                              | rs638405    | NA |
| chr11 | 1.17E+08 | 1.17E+08 | A        | C      | exonic   | CEP164                     | nonsynonymous SNV    | 01271933:exon13:c.A1711C;p.T571P,CEP164:NM_014956:exon14:c.A:  | NA                              | rs74388237  | B  |
| chr11 | 1.17E+08 | 1.17E+08 | G        | T      | exonic   | DSCAML1                    | nonsynonymous SNV    | DSCAML1:NM_020693:exon4:c.C694A;p.H232N                        | )=COSM147330;OCCURENCE=1(stomac | rs3741280   | NA |
| chr11 | 1.18E+08 | 1.18E+08 | CACA     | -      | UTR3     | FXD6                       | NA                   | NA                                                             | NA                              | NA          | NA |
| chr11 | 1.18E+08 | 1.18E+08 | G        | A      | UTR3     | IL10RA                     | NA                   | NA                                                             | NA                              | rs9610      | NA |
| chr11 | 1.19E+08 | 1.19E+08 | G        | A      | UTR3     | DDX6                       | NA                   | NA                                                             | NA                              | rs78116693  | NA |
| chr11 | 1.19E+08 | 1.19E+08 | G        | C      | UTR3     | DDX6                       | NA                   | NA                                                             | NA                              | rs487728    | NA |
| chr11 | 1.19E+08 | 1.19E+08 | -        | T      | UTR3     | DDX6                       | NA                   | NA                                                             | NA                              | rs139078958 | NA |
| chr11 | 1.19E+08 | 1.19E+08 | C        | T      | exonic   | BCL9L                      | synonymous SNV       | BCL9L:NM_182557:exon6:c.G1014A;p.S338S                         | NA                              | rs35346926  | NA |
| chr11 | 1.19E+08 | 1.19E+08 | T        | G      | UTR3     | HYOU1                      | NA                   | NA                                                             | NA                              | NA          | NA |
| chr11 | 1.23E+08 | 1.23E+08 | C        | A      | exonic   | UBASH3B                    | nonsynonymous SNV    | UBASH3B:NM_032873:exon4:c.C411A;p.D137E                        | NA                              | NA          | D  |
| chr11 | 1.23E+08 | 1.23E+08 | C        | T      | exonic   | CLMP                       | nonsynonymous SNV    | CLMP:NM_024769:exon3:c.G206A;p.R69H                            | NA                              | rs2276348   | B  |
| chr11 | 1.24E+08 | 1.24E+08 | C        | T      | exonic   | VWA5A                      | synonymous SNV       | 14622:exon17:c.C2205T;p.H735H,VWA5A:NM_001130142:exon18:c.C:   | NA                              | rs1056615   | NA |
| chr11 | 1.25E+08 | 1.25E+08 | -        | T      | UTR3     | MSANTD2                    | NA                   | NA                                                             | NA                              | rs137996267 | NA |
| chr11 | 1.25E+08 | 1.25E+08 | T        | G      | exonic   | ROBO3                      | synonymous SNV       | ROBO3:NM_022370:exon15:c.T2343G;p.G781G                        | NA                              | NA          | NA |
| chr11 | 1.25E+08 | 1.25E+08 | G        | A      | exonic   | ROBO4                      | synonymous SNV       | ROBO4:NM_019055:exon2:c.C103T;p.L35L                           | NA                              | rs73016370  | NA |
| chr11 | 1.25E+08 | 1.25E+08 | G        | A      | UTR3     | SLC37A2                    | NA                   | NA                                                             | NA                              | NA          | NA |
| chr11 | 1.25E+08 | 1.25E+08 | -        | C      | exonic   | EI24                       | frameshift insertion | EI24:NM_001007277:exon9:c.732_733insC;p.R244fs                 | NA                              | rs150851358 | NA |
| chr11 | 1.25E+08 | 1.25E+08 | AAAA     | -      | UTR3     | EI24                       | NA                   | NA                                                             | NA                              | NA          | NA |



|       |          |          |     |          |              |              |                         |                                                                                               |    |             |    |
|-------|----------|----------|-----|----------|--------------|--------------|-------------------------|-----------------------------------------------------------------------------------------------|----|-------------|----|
| chr11 | 1.25E+08 | 1.25E+08 | C   | T        | exonic       | STT3A        | synonymous SNV          | STT3A:NM_152713:exon16:c.C1911T:p.C637C                                                       | NA | rs17140116  | NA |
| chr11 | 1.25E+08 | 1.25E+08 | C   | T        | UTR5         | CHEK1        | NA                      | NA                                                                                            | NA | rs61451117  | NA |
| chr11 | 1.25E+08 | 1.25E+08 | C   | T        | UTR5         | CHEK1        | NA                      | NA                                                                                            | NA | rs558351    | NA |
| chr11 | 1.26E+08 | 1.26E+08 | C   | T        | UTR5         | HYLS1        | NA                      | NA                                                                                            | NA | rs583355    | NA |
| chr11 | 1.26E+08 | 1.26E+08 | T   | G        | UTR3         | CDON         | NA                      | NA                                                                                            | NA | rs61917812  | NA |
| chr11 | 1.26E+08 | 1.26E+08 | C   | T        | exonic       | DCPS         | synonymous SNV          | DCPS:NM_014026:exon1:c.C63T:p.H21H                                                            | NA | rs3740915   | NA |
| chr11 | 1.29E+08 | 1.29E+08 | C   | G        | UTR5         | KCNJ5        | NA                      | NA                                                                                            | NA | NA          | NA |
| chr11 | 1.29E+08 | 1.29E+08 | C   | G        | UTR5         | KCNJ5        | NA                      | NA                                                                                            | NA | rs10893931  | NA |
| chr11 | 1.3E+08  | 1.3E+08  | C   | T        | exonic       | PRDM10       | nonsynonymous SNV       | NM_020228:exon2:c.G64A:p.A22T,PRDM10:NM_199437:exon2:c.G64A:p.COSM147383;OCCURENCE=1(stomach) | NA | rs11221912  | B  |
| chr11 | 1.3E+08  | 1.3E+08  | T   | G        | ncRNA_exonic | LINC00167    | NA                      | NA                                                                                            | NA | NA          | NA |
| chr11 | 1.3E+08  | 1.3E+08  | -   | T        | UTR3         | ZBTB44       | NA                      | NA                                                                                            | NA | NA          | NA |
| chr11 | 1.32E+08 | 1.32E+08 | T   | -        | UTR3         | NTM          | NA                      | NA                                                                                            | NA | rs61142048  | NA |
| chr11 | 1.34E+08 | 1.34E+08 | C   | G        | exonic       | IGSF9B       | synonymous SNV          | IGSF9B:NM_001277285:exon2:c.G237C:p.P79P                                                      | NA | rs10894768  | NA |
| chr11 | 1.34E+08 | 1.34E+08 | G   | A        | UTR3         | JAM3         | NA                      | NA                                                                                            | NA | rs597320    | NA |
| chr12 | 147969   | 147969   | T   | -        | ncRNA_exonic | FAM138D      | NA                      | NA                                                                                            | NA | rs112827715 | NA |
| chr12 | 427575   | 427575   | A   | G        | exonic       | KDM5A        | nonsynonymous SNV       | KDM5A:NM_001042603:exon19:c.T2594C:p.M865T                                                    | NA | rs11062385  | B  |
| chr12 | 498268   | 498270   | GGG | -        | UTR5         | KDM5A        | NA                      | NA                                                                                            | NA | NA          | NA |
| chr12 | 1022452  | 1022452  | C   | T        | UTR3         | RAD52        | NA                      | NA                                                                                            | NA | rs1051669   | NA |
| chr12 | 1613273  | 1613273  | T   | -        | ncRNA_exonic | LOC100292680 | NA                      | NA                                                                                            | NA | rs34677864  | NA |
| chr12 | 1613488  | 1613488  | G   | -        | ncRNA_exonic | LOC100292680 | NA                      | NA                                                                                            | NA | rs58197174  | NA |
| chr12 | 3049488  | 3049488  | A   | -        | UTR3         | TULP3        | NA                      | NA                                                                                            | NA | NA          | NA |
| chr12 | 3393127  | 3393127  | T   | G        | UTR3         | TSPAN9       | NA                      | NA                                                                                            | NA | NA          | NA |
| chr12 | 3393144  | 3393144  | T   | G        | UTR3         | TSPAN9       | NA                      | NA                                                                                            | NA | NA          | NA |
| chr12 | 3394436  | 3394436  | T   | G        | UTR3         | TSPAN9       | NA                      | NA                                                                                            | NA | NA          | NA |
| chr12 | 4410639  | 4410639  | T   | -        | UTR3         | CCND2        | NA                      | NA                                                                                            | NA | NA          | NA |
| chr12 | 4414167  | 4414167  | T   | -        | UTR3         | CCND2        | NA                      | NA                                                                                            | NA | rs61152953  | NA |
| chr12 | 4463020  | 4463020  | C   | G        | UTR3         | C12orf5      | NA                      | NA                                                                                            | NA | rs7297048   | NA |
| chr12 | 4463032  | 4463032  | G   | T        | UTR3         | C12orf5      | NA                      | NA                                                                                            | NA | rs7296130   | NA |
| chr12 | 4627414  | 4627414  | C   | T        | exonic       | C12orf4      | synonymous SNV          | C12orf4:NM_020374:exon8:c.G843A:p.Q281Q                                                       | NA | rs35924298  | NA |
| chr12 | 4919197  | 4919197  | T   | C        | UTR5         | KCNA6        | NA                      | NA                                                                                            | NA | NA          | NA |
| chr12 | 4919248  | 4919248  | A   | G        | exonic       | KCNA6        | nonsynonymous SNV       | KCNA6:NM_002235:exon1:c.A41G:p.E14G                                                           | NA | NA          | P  |
| chr12 | 4919251  | 4919251  | T   | G        | exonic       | KCNA6        | nonsynonymous SNV       | KCNA6:NM_002235:exon1:c.T44G:p.V15G                                                           | NA | NA          | P  |
| chr12 | 4919269  | 4919269  | A   | G        | exonic       | KCNA6        | nonsynonymous SNV       | KCNA6:NM_002235:exon1:c.A62G:p.E21G                                                           | NA | NA          | B  |
| chr12 | 6560338  | 6560338  | A   | C        | ncRNA_exonic | CD27-AS1     | NA                      | NA                                                                                            | NA | NA          | NA |
| chr12 | 6560343  | 6560343  | T   | C        | ncRNA_exonic | CD27-AS1     | NA                      | NA                                                                                            | NA | NA          | NA |
| chr12 | 6715593  | 6715593  | A   | G        | UTR5         | CHD4         | NA                      | NA                                                                                            | NA | rs1734116   | NA |
| chr12 | 6862174  | 6862174  | C   | G        | upstream     | MLF2         | NA                      | NA                                                                                            | NA | rs13402     | NA |
| chr12 | 6980076  | 6980076  | A   | -        | UTR3         | TPI1         | NA                      | NA                                                                                            | NA | NA          | NA |
| chr12 | 7023123  | 7023123  | A   | G        | exonic       | LRRC23       | nonsynonymous SNV       | LRRC23:NM_006992:exon7:c.A827G:p.E276G                                                        | NA | rs710415    | NA |
| chr12 | 7247166  | 7247166  | -   | A        | UTR3         | C1RL         | NA                      | NA                                                                                            | NA | NA          | NA |
| chr12 | 7311419  | 7311420  | TG  | -        | UTR3         | CLSTN3       | NA                      | NA                                                                                            | NA | rs55888711  | NA |
| chr12 | 7649484  | 7649484  | T   | C        | exonic       | CD163        | nonsynonymous SNV       | 1_004244:exon5:c.A1024G:p.I342V,CD163:NM_203416:exon5:c.A1024                                 | NA | rs4883263   | NA |
| chr12 | 7945559  | 7945559  | T   | C        | exonic       | NANOG        | synonymous SNV          | NANOG:NM_024865:exon2:c.T165C:p.P55P                                                          | NA | rs4294629   | NA |
| chr12 | 7945640  | 7945640  | G   | T        | exonic       | NANOG        | nonsynonymous SNV       | NANOG:NM_024865:exon2:c.G246T:p.K82N                                                          | NA | rs2889551   | B  |
| chr12 | 7945670  | 7945670  | G   | A        | exonic       | NANOG        | synonymous SNV          | NANOG:NM_024865:exon2:c.G276A:p.P92P                                                          | NA | rs4354764   | NA |
| chr12 | 7945757  | 7945757  | C   | T        | exonic       | NANOG        | synonymous SNV          | NANOG:NM_024865:exon2:c.C363T:p.S121S                                                         | NA | rs4438116   | NA |
| chr12 | 7948108  | 7948108  | G   | A        | UTR3         | NANOG        | NA                      | NA                                                                                            | NA | rs61937162  | NA |
| chr12 | 7948160  | 7948160  | A   | G        | UTR3         | NANOG        | NA                      | NA                                                                                            | NA | rs28538179  | NA |
| chr12 | 7948476  | 7948476  | C   | T        | UTR3         | NANOG        | NA                      | NA                                                                                            | NA | rs35472045  | NA |
| chr12 | 7948517  | 7948517  | C   | T        | UTR3         | NANOG        | NA                      | NA                                                                                            | NA | rs34237790  | NA |
| chr12 | 7948549  | 7948549  | G   | A        | UTR3         | NANOG        | NA                      | NA                                                                                            | NA | rs34367740  | NA |
| chr12 | 7948584  | 7948584  | C   | A        | UTR3         | NANOG        | NA                      | NA                                                                                            | NA | rs35212015  | NA |
| chr12 | 8186173  | 8186173  | G   | T        | UTR5         | FOXJ2        | NA                      | NA                                                                                            | NA | NA          | NA |
| chr12 | 8353200  | 8353200  | G   | T        | ncRNA_exonic | FAM66C       | NA                      | NA                                                                                            | NA | rs71189369  | NA |
| chr12 | 8353252  | 8353252  | G   | A        | ncRNA_exonic | FAM66C       | NA                      | NA                                                                                            | NA | rs200087976 | NA |
| chr12 | 8353486  | 8353486  | C   | G        | ncRNA_exonic | FAM66C       | NA                      | NA                                                                                            | NA | rs200786680 | NA |
| chr12 | 8799388  | 8799388  | G   | T        | UTR3         | MFAP5        | NA                      | NA                                                                                            | NA | NA          | NA |
| chr12 | 8927169  | 8927169  | T   | -        | UTR3         | RIMKLB       | NA                      | NA                                                                                            | NA | rs56912350  | NA |
| chr12 | 9098995  | 9098995  | -   | AAC      | exonic       | M6PR         | nonframeshift insertion | '024:exon2:c.6_7insGTT:p.F2delinsLF,M6PR:NM_002355:exon2:c.6_7ins                             | NA | rs149871778 | NA |
| chr12 | 9162783  | 9162783  | A   | -        | UTR3         | KLRG1        | NA                      | NA                                                                                            | NA | NA          | NA |
| chr12 | 9436262  | 9436262  | T   | G        | ncRNA_exonic | LOC642846    | NA                      | NA                                                                                            | NA | NA          | NA |
| chr12 | 9466225  | 9466225  | C   | T        | ncRNA_exonic | LOC642846    | NA                      | NA                                                                                            | NA | rs2911815   | NA |
| chr12 | 9585079  | 9585079  | G   | A        | ncRNA_exonic | DDX12P       | NA                      | NA                                                                                            | NA | NA          | NA |
| chr12 | 9851808  | 9851808  | G   | T        | UTR3         | CLEC2D       | NA                      | NA                                                                                            | NA | rs10772046  | NA |
| chr12 | 10022448 | 10022448 | -   | CACACACA | UTR5         | CLEC2B       | NA                      | NA                                                                                            | NA | rs10644863  | NA |
| chr12 | 10365574 | 10365574 | C   | G        | UTR5         | GABARAPL1    | NA                      | NA                                                                                            | NA | rs2302486   | NA |

|       |          |          |           |    |              |           |                        |                                                                |                                  |             |    |
|-------|----------|----------|-----------|----|--------------|-----------|------------------------|----------------------------------------------------------------|----------------------------------|-------------|----|
| chr12 | 10468648 | 10468648 | T         | C  | UTR3         | KLRD1     | NA                     | NA                                                             | NA                               | rs7966660   | NA |
| chr12 | 10560957 | 10560957 | T         | C  | exonic       | KLRC4     | nonsynonymous SNV      | KLRC4:NM_013431:exon3:c.A311G:p.N104S                          | NA                               | rs2617170   | NA |
| chr12 | 10746385 | 10746385 | G         | A  | ncRNA_exonic | KLRAP1    | NA                     | NA                                                             | NA                               | rs2244387   | NA |
| chr12 | 11183752 | 11183752 | T         | C  | exonic       | TAS2R31   | synonymous SNV         | TAS2R31:NM_176885:exon1:c.A183G:p.V61V                         | NA                               | rs72475489  | NA |
| chr12 | 11183920 | 11183920 | T         | C  | exonic       | TAS2R31   | nonsynonymous SNV      | TAS2R31:NM_176885:exon1:c.A15G:p.I5M                           | NA                               | rs201034225 | NA |
| chr12 | 11183922 | 11183922 | T         | G  | exonic       | TAS2R31   | nonsynonymous SNV      | TAS2R31:NM_176885:exon1:c.A13C:p.I5L                           | NA                               | NA          | NA |
| chr12 | 11183930 | 11183930 | G         | A  | exonic       | TAS2R31   | nonsynonymous SNV      | TAS2R31:NM_176885:exon1:c.C5T:p.T2I                            | NA                               | NA          | NA |
| chr12 | 11183952 | 11183952 | A         | G  | ncRNA_UTR5   | TAS2R31   | NA                     | NA                                                             | NA                               | NA          | NA |
| chr12 | 11183958 | 11183958 | G         | T  | ncRNA_UTR5   | TAS2R31   | NA                     | NA                                                             | NA                               | NA          | NA |
| chr12 | 11183961 | 11183961 | T         | A  | ncRNA_UTR5   | TAS2R31   | NA                     | NA                                                             | NA                               | NA          | NA |
| chr12 | 11183962 | 11183962 | T         | A  | ncRNA_UTR5   | TAS2R31   | NA                     | NA                                                             | NA                               | NA          | NA |
| chr12 | 11183977 | 11183977 | G         | A  | ncRNA_UTR5   | TAS2R31   | NA                     | NA                                                             | NA                               | rs73254862  | NA |
| chr12 | 11420471 | 11420471 | C         | G  | exonic       | PRB3      | nonsynonymous SNV      | PRB3:NM_006249:exon3:c.G712C:p.G238R                           | NA                               | NA          | NA |
| chr12 | 11420647 | 11420647 | T         | C  | exonic       | PRB3      | nonsynonymous SNV      | PRB3:NM_006249:exon3:c.A536G:p.H179R                           | NA                               | rs78040729  | NA |
| chr12 | 11420715 | 11420715 | C         | G  | exonic       | PRB3      | synonymous SNV         | PRB3:NM_006249:exon3:c.G468C:p.P156P                           | NA                               | NA          | NA |
| chr12 | 11461533 | 11461533 | G         | T  | exonic       | PRB4      | synonymous SNV         | PRB4:NM_002723:exon3:c.C384A:p.G128G                           | NA                               | NA          | NA |
| chr12 | 11461742 | 11461742 | C         | T  | exonic       | PRB4      | nonsynonymous SNV      | 1_001261399:exon3:c.G175A:p.G59R,PRB4:NM_002723:exon3:c.G175   | NA                               | NA          | NA |
| chr12 | 11461802 | 11461802 | G         | A  | exonic       | PRB4      | stopgain SNV           | 1_001261399:exon3:c.C115T:p.R39X,PRB4:NM_002723:exon3:c.C115   | NA                               | rs12829245  | NA |
| chr12 | 12045145 | 12045147 | TTT       | -  | ncRNA_UTR3   | ETV6      | NA                     | NA                                                             | NA                               | NA          | NA |
| chr12 | 12046785 | 12046785 | C         | T  | ncRNA_UTR3   | ETV6      | NA                     | NA                                                             | NA                               | rs59866364  | NA |
| chr12 | 12046813 | 12046813 | A         | G  | ncRNA_UTR3   | ETV6      | NA                     | NA                                                             | NA                               | rs2710275   | NA |
| chr12 | 12943043 | 12943045 | TTC       | -  | UTR3         | APOLD1    | NA                     | NA                                                             | NA                               | rs146851735 | NA |
| chr12 | 13029070 | 13029071 | AA        | -  | ncRNA_exonic | RPL13AP20 | NA                     | NA                                                             | NA                               | NA          | NA |
| chr12 | 13153388 | 13153388 | G         | T  | ncRNA_exonic | HTR7P1    | NA                     | NA                                                             | NA                               | rs77117939  | NA |
| chr12 | 18435399 | 18435401 | CCC       | -  | exonic       | PIK3C2G   | nonframeshift deletion | PIK3C2G:NM_004570:exon2:c.384_386del:p.128_129del              | NA                               | rs55845540  | NA |
| chr12 | 18499636 | 18499636 | C         | T  | exonic       | PIK3C2G   | synonymous SNV         | PIK3C2G:NM_004570:exon11:c.C1491T:p.Y497Y                      | )=COSM147454;OCCURENCE=1(stomacl | rs17847788  | NA |
| chr12 | 18656225 | 18656225 | G         | A  | exonic       | PIK3C2G   | synonymous SNV         | PIK3C2G:NM_004570:exon22:c.G2904A:p.Q968Q                      | NA                               | rs11044142  | NA |
| chr12 | 20968645 | 20968662 | CACTTGGT, | -  | UTR5         | SLCO1B3   | NA                     | NA                                                             | NA                               | NA          | NA |
| chr12 | 20968666 | 20968669 | TTTA      | -  | UTR5         | SLCO1B3   | NA                     | NA                                                             | NA                               | rs4149158   | NA |
| chr12 | 21329738 | 21329738 | A         | G  | exonic       | SLCO1B1   | nonsynonymous SNV      | SLCO1B1:NM_006446:exon5:c.A388G:p.N130D                        | NA                               | rs2306283   | B  |
| chr12 | 21487769 | 21487769 | -         | T  | UTR5         | SLCO1A2   | NA                     | NA                                                             | NA                               | rs3834939   | NA |
| chr12 | 22351457 | 22351458 | AC        | -  | UTR3         | ST8SIA1   | NA                     | NA                                                             | NA                               | rs71718015  | NA |
| chr12 | 22839786 | 22839794 | TTTTTTTTT | -  | UTR3         | ETNK1     | NA                     | NA                                                             | NA                               | NA          | NA |
| chr12 | 24967736 | 24967736 | G         | -  | UTR3         | BCAT1     | NA                     | NA                                                             | NA                               | rs139849074 | NA |
| chr12 | 26386265 | 26386266 | AT        | -  | UTR3         | SSPN      | NA                     | NA                                                             | NA                               | rs10547333  | NA |
| chr12 | 27846972 | 27846972 | G         | A  | UTR3         | PPFIBP1   | NA                     | NA                                                             | NA                               | rs151006610 | NA |
| chr12 | 27953288 | 27953288 | T         | G  | UTR3         | KLHL42    | NA                     | NA                                                             | NA                               | rs150881191 | NA |
| chr12 | 29493586 | 29493586 | T         | -  | UTR3         | ERGIC2    | NA                     | NA                                                             | NA                               | NA          | NA |
| chr12 | 31821428 | 31821428 | -         | T  | UTR3         | METTL20   | NA                     | NA                                                             | NA                               | NA          | NA |
| chr12 | 31821464 | 31821464 | C         | A  | UTR3         | METTL20   | NA                     | NA                                                             | NA                               | rs137891657 | NA |
| chr12 | 32797823 | 32797823 | A         | -  | UTR3         | FGD4      | NA                     | NA                                                             | NA                               | NA          | NA |
| chr12 | 34175263 | 34175263 | G         | C  | UTR5         | ALG10     | NA                     | NA                                                             | NA                               | NA          | NA |
| chr12 | 39687536 | 39687536 | A         | -  | UTR3         | KIF21A    | NA                     | NA                                                             | NA                               | rs201147142 | NA |
| chr12 | 45307633 | 45307633 | T         | C  | UTR5         | NELL2     | NA                     | NA                                                             | NA                               | rs374144    | NA |
| chr12 | 48176656 | 48176657 | CA        | -  | UTR3         | HDAC7     | NA                     | NA                                                             | NA                               | rs57423868  | NA |
| chr12 | 48398080 | 48398080 | T         | A  | exonic       | COL2A1    | nonsynonymous SNV      | .1:NM_001844:exon1:c.A25T:p.T9S,COL2A1:NM_033150:exon1:c.A25T  | NA                               | rs3803183   | NA |
| chr12 | 48542411 | 48542411 | C         | T  | UTR3         | ASB8      | NA                     | NA                                                             | NA                               | NA          | NA |
| chr12 | 48542415 | 48542415 | A         | G  | UTR3         | ASB8      | NA                     | NA                                                             | NA                               | rs12310813  | NA |
| chr12 | 49251014 | 49251014 | T         | C  | UTR3         | RND1      | NA                     | NA                                                             | NA                               | NA          | NA |
| chr12 | 49251047 | 49251047 | C         | A  | UTR3         | RND1      | NA                     | NA                                                             | NA                               | NA          | NA |
| chr12 | 49298059 | 49298059 | G         | A  | UTR5         | CCDC65    | NA                     | NA                                                             | NA                               | rs3809147   | NA |
| chr12 | 49445517 | 49445517 | A         | T  | exonic       | MLL2      | nonsynonymous SNV      | MLL2:NM_003482:exon10:c.T1949A:p.V650E                         | NA                               | NA          | NA |
| chr12 | 49483423 | 49483423 | C         | T  | UTR3         | DHH       | NA                     | NA                                                             | NA                               | rs145466782 | NA |
| chr12 | 49726255 | 49726255 | -         | G  | UTR3         | C1QL4     | NA                     | NA                                                             | NA                               | rs112341833 | NA |
| chr12 | 50262401 | 50262401 | A         | C  | UTR3         | FAIM2     | NA                     | NA                                                             | NA                               | NA          | NA |
| chr12 | 50589666 | 50589666 | G         | A  | exonic       | LIMA1     | nonsynonymous SNV      | _001113547:exon5:c.C497T:p.S166F,LIMA1:NM_001113546:exon8:c.C! | NA                               | NA          | P  |
| chr12 | 50746568 | 50746568 | C         | G  | exonic       | FAM186A   | nonsynonymous SNV      | FAM186A:NM_001145475:exon4:c.G4047C:p.M1349I                   | NA                               | NA          | NA |
| chr12 | 50747134 | 50747134 | T         | G  | exonic       | FAM186A   | nonsynonymous SNV      | FAM186A:NM_001145475:exon4:c.A3481C:p.T1161P                   | NA                               | NA          | NA |
| chr12 | 50747160 | 50747160 | T         | G  | exonic       | FAM186A   | nonsynonymous SNV      | FAM186A:NM_001145475:exon4:c.A3455C:p.D1152A                   | NA                               | NA          | NA |
| chr12 | 51203371 | 51203371 | C         | T  | exonic       | ATF1      | synonymous SNV         | ATF1:NM_005171:exon4:c.C327T:p.Y109Y                           | NA                               | rs1129406   | NA |
| chr12 | 51324874 | 51324875 | TT        | -  | UTR3         | METTL7A   | NA                     | NA                                                             | NA                               | rs56130607  | NA |
| chr12 | 51723499 | 51723499 | T         | C  | exonic       | CELA1     | nonsynonymous SNV      | CELA1:NM_001971:exon7:c.A728G:p.Q243R                          | NA                               | rs17860364  | B  |
| chr12 | 51740413 | 51740413 | -         | C  | exonic       | CELA1     | frameshift insertion   | CELA1:NM_001971:exon1:c.10_11insG:p.L4fs                       | NA                               | NA          | NA |
| chr12 | 52212288 | 52212288 | T         | C  | UTR3         | FIGNL2    | NA                     | NA                                                             | NA                               | rs303821    | NA |
| chr12 | 52285209 | 52285209 | -         | TA | UTR3         | ANKRD33   | NA                     | NA                                                             | NA                               | rs35582441  | NA |
| chr12 | 52409005 | 52409005 | T         | G  | UTR3         | GRASP     | NA                     | NA                                                             | NA                               | NA          | NA |

|       |          |          |           |          |              |                     |                   |                                                               |                                  |             |    |
|-------|----------|----------|-----------|----------|--------------|---------------------|-------------------|---------------------------------------------------------------|----------------------------------|-------------|----|
| chr12 | 52844243 | 52844243 | A         | G        | exonic       | KRT6B               | synonymous SNV    | KRT6B:NM_005555:exon2:c.T702C:p.R234R                         | NA                               | rs28414881  | NA |
| chr12 | 52844246 | 52844246 | A         | G        | exonic       | KRT6B               | synonymous SNV    | KRT6B:NM_005555:exon2:c.T699C:p.G233G                         | ID=COSM118699;OCCURENCE=1(ovary) | rs28542657  | NA |
| chr12 | 52908789 | 52908789 | A         | C        | exonic       | KRT5                | synonymous SNV    | KRT5:NM_000424:exon9:c.T1710G:p.G570G                         | NA                               | rs201553490 | NA |
| chr12 | 52986187 | 52986187 | T         | C        | exonic       | KRT72               | nonsynonymous SNV | 91G:p.Y264C,KRT72:NM_001146226:exon4:c.A791G:p.Y264C,KRT72:N  | NA                               | rs12833456  | B  |
| chr12 | 52994955 | 52994955 | G         | A        | exonic       | KRT72               | synonymous SNV    | 2282T:p.P94P,KRT72:NM_001146226:exon1:c.C282T:p.P94P,KRT72:NM | NA                               | rs61747192  | NA |
| chr12 | 53045626 | 53045626 | T         | C        | exonic       | KRT2                | nonsynonymous SNV | KRT2:NM_000423:exon1:c.A301G:p.S101G                          | NA                               | rs2634041   | NA |
| chr12 | 53070145 | 53070145 | G         | A        | exonic       | KRT1                | synonymous SNV    | KRT1:NM_006121:exon7:c.C1389T:p.R463R                         | NA                               | rs936958    | NA |
| chr12 | 53085032 | 53085032 | T         | C        | exonic       | KRT77               | nonsynonymous SNV | KRT77:NM_175078:exon9:c.A1654G:p.S552G                        | NA                               | NA          | NA |
| chr12 | 53085044 | 53085044 | T         | C        | exonic       | KRT77               | nonsynonymous SNV | KRT77:NM_175078:exon9:c.A1642G:p.S548G                        | NA                               | NA          | NA |
| chr12 | 53729491 | 53729491 | T         | G        | UTR5         | SP7                 | NA                | NA                                                            | NA                               | NA          | NA |
| chr12 | 53810124 | 53810124 | G         | T        | UTR3         | SP1                 | NA                | NA                                                            | NA                               | NA          | NA |
| chr12 | 53810134 | 53810136 | TTT       | -        | UTR3         | SP1                 | NA                | NA                                                            | NA                               | rs147945503 | NA |
| chr12 | 53877766 | 53877766 | C         | T        | exonic       | MAP3K12             | synonymous SNV    | 001193511:exon8:c.G1287A:p.K429K,MAP3K12:NM_006301:exon9:c.C  | NA                               | NA          | NA |
| chr12 | 54427103 | 54427103 | A         | C        | exonic       | HOXC5               | nonsynonymous SNV | HOXC5:NM_018953:exon1:c.A197C:p.N66T                          | NA                               | NA          | B  |
| chr12 | 54427115 | 54427115 | A         | C        | exonic       | HOXC5               | nonsynonymous SNV | HOXC5:NM_018953:exon1:c.A209C:p.H70P                          | ID=COSM548948;OCCURENCE=1(lung)  | NA          | B  |
| chr12 | 54475448 | 54475448 | G         | C        | ncRNA_exonic | LOC100240735        | NA                | NA                                                            | NA                               | rs4016762   | NA |
| chr12 | 54475535 | 54475535 | C         | A        | ncRNA_exonic | LOC100240735        | NA                | NA                                                            | NA                               | rs80341901  | NA |
| chr12 | 54515276 | 54515276 | A         | G        | ncRNA_exonic | FLJ12825            | NA                | NA                                                            | NA                               | rs200300428 | NA |
| chr12 | 54515279 | 54515279 | T         | C        | ncRNA_exonic | FLJ12825            | NA                | NA                                                            | NA                               | rs151283170 | NA |
| chr12 | 54515281 | 54515281 | A         | G        | ncRNA_exonic | FLJ12825            | NA                | NA                                                            | NA                               | rs145203398 | NA |
| chr12 | 54515302 | 54515302 | T         | C        | ncRNA_exonic | FLJ12825            | NA                | NA                                                            | NA                               | rs139731963 | NA |
| chr12 | 54515663 | 54515663 | C         | G        | ncRNA_exonic | FLJ12825            | NA                | NA                                                            | NA                               | rs77340285  | NA |
| chr12 | 54802551 | 54802551 | T         | A        | exonic       | ITGA5               | nonsynonymous SNV | ITGA5:NM_002205:exon6:c.A680T:p.Y227F                         | NA                               | NA          | P  |
| chr12 | 54905815 | 54905815 | C         | G        | exonic       | NCKAP1L             | synonymous SNV    | 001184976:exon9:c.C717G:p.L239L,NCKAP1L:NM_005337:exon9:c.C   | NA                               | rs2458409   | NA |
| chr12 | 54973122 | 54973123 | AT        | -        | UTR3         | PPP1R1A             | NA                | NA                                                            | NA                               | rs67431222  | NA |
| chr12 | 56295237 | 56295237 | A         | -        | UTR3         | WIBG                | NA                | NA                                                            | NA                               | NA          | NA |
| chr12 | 56991346 | 56991346 | G         | A        | UTR3         | BAZ2A               | NA                | NA                                                            | NA                               | rs202206071 | NA |
| chr12 | 56991346 | 56991346 | -         | CACACACA | UTR3         | BAZ2A               | NA                | NA                                                            | NA                               | rs138865943 | NA |
| chr12 | 57030026 | 57030026 | T         | C        | UTR5         | BAZ2A               | NA                | NA                                                            | NA                               | rs2255074   | NA |
| chr12 | 57111185 | 57111185 | A         | G        | intronic     | NACA                | NA                | NA                                                            | NA                               | NA          | NA |
| chr12 | 57607124 | 57607126 | AAA       | -        | UTR3         | LRP1                | NA                | NA                                                            | NA                               | rs147945774 | NA |
| chr12 | 57978383 | 57978386 | CACG      | -        | UTR3         | KIF5A               | NA                | NA                                                            | NA                               | rs150797197 | NA |
| chr12 | 57985204 | 57985204 | C         | T        | exonic       | PIP4K2C             | synonymous SNV    | 001146259:exon1:c.C132T:p.A44A,PIP4K2C:NM_001146260:exon1:c   | NA                               | rs11537654  | NA |
| chr12 | 58119120 | 58119120 | -         | AA       | UTR3         | AGAP2               | NA                | NA                                                            | NA                               | NA          | NA |
| chr12 | 58166403 | 58166403 | T         | G        | UTR5         | METTL21B            | NA                | NA                                                            | NA                               | rs2291617   | NA |
| chr12 | 63041688 | 63041688 | -         | A        | UTR3         | PPM1H               | NA                | NA                                                            | NA                               | NA          | NA |
| chr12 | 64472873 | 64472873 | G         | A        | exonic       | SRGAP1              | nonsynonymous SNV | SRGAP1:NM_020762:exon9:c.G1300A:p.E434K                       | NA                               | NA          | D  |
| chr12 | 64537561 | 64537561 | A         | -        | UTR3         | SRGAP1              | NA                | NA                                                            | NA                               | NA          | NA |
| chr12 | 64538324 | 64538324 | G         | T        | UTR3         | SRGAP1              | NA                | NA                                                            | NA                               | rs789736    | NA |
| chr12 | 64538615 | 64538615 | A         | C        | UTR3         | SRGAP1              | NA                | NA                                                            | NA                               | rs2643664   | NA |
| chr12 | 64539337 | 64539337 | T         | -        | UTR3         | SRGAP1              | NA                | NA                                                            | NA                               | NA          | NA |
| chr12 | 64746833 | 64746833 | C         | T        | exonic       | C12orf56            | nonsynonymous SNV | 001099676:exon2:c.G256A:p.D86N,C12orf56:NM_001170633:exon2:c  | NA                               | rs73118352  | NA |
| chr12 | 69159402 | 69159402 | A         | G        | UTR3         | SLC35E3             | NA                | NA                                                            | NA                               | rs111267703 | NA |
| chr12 | 69159404 | 69159404 | A         | G        | UTR3         | SLC35E3             | NA                | NA                                                            | NA                               | NA          | NA |
| chr12 | 69159420 | 69159420 | G         | A        | UTR3         | SLC35E3             | NA                | NA                                                            | NA                               | NA          | NA |
| chr12 | 69236874 | 69236874 | T         | -        | UTR3         | MDM2                | NA                | NA                                                            | NA                               | NA          | NA |
| chr12 | 69246336 | 69246336 | -         | T        | UTR3         | CPM                 | NA                | NA                                                            | NA                               | NA          | NA |
| chr12 | 69667890 | 69667890 | T         | -        | UTR3         | CPSF6               | NA                | NA                                                            | NA                               | NA          | NA |
| chr12 | 70213140 | 70213141 | AG        | -        | UTR3         | RAB3IP              | NA                | NA                                                            | NA                               | rs10578304  | NA |
| chr12 | 71094955 | 71094955 | C         | T        | exonic       | PTPRR               | nonsynonymous SNV | 001207016:exon4:c.G538A:p.V180I,PTPRR:NM_001207015:exon6:c.G8 | NA                               | rs35387004  | B  |
| chr12 | 72079955 | 72079955 | T         | C        | UTR5         | TMEM19              | NA                | NA                                                            | NA                               | NA          | NA |
| chr12 | 72318795 | 72318795 | A         | -        | UTR3         | TBC1D15             | NA                | NA                                                            | NA                               | NA          | NA |
| chr12 | 76747082 | 76747082 | T         | -        | UTR3         | OSBPL8              | NA                | NA                                                            | NA                               | rs34398462  | NA |
| chr12 | 78530979 | 78530979 | G         | A        | exonic       | NAV3                | synonymous SNV    | NAV3:NM_014903:exon19:c.G4464A:p.Q1488Q                       | NA                               | rs1852464   | NA |
| chr12 | 85285920 | 85285920 | -         | A        | UTR5         | SLC6A15             | NA                | NA                                                            | NA                               | rs36111430  | NA |
| chr12 | 88591980 | 88591980 | T         | -        | UTR3         | TMTC3               | NA                | NA                                                            | NA                               | NA          | NA |
| chr12 | 89914880 | 89914886 | ATTATTA   | -        | UTR3         | GALNT4,POC1B-GALNT4 | NA                | NA                                                            | NA                               | NA          | NA |
| chr12 | 89984194 | 89984194 | T         | -        | UTR3         | ATP2B1              | NA                | NA                                                            | NA                               | NA          | NA |
| chr12 | 93196422 | 93196422 | T         | G        | exonic       | EEA1                | nonsynonymous SNV | EEA1:NM_003566:exon19:c.A2428C:p.K810Q                        | NA                               | rs10745623  | B  |
| chr12 | 93963873 | 93963873 | C         | T        | ncRNA_UTR5   | SOCS2               | NA                | NA                                                            | NA                               | rs2200160   | NA |
| chr12 | 94631496 | 94631496 | C         | T        | exonic       | PLXNC1              | synonymous SNV    | PLXNC1:NM_005761:exon10:c.C2037T:p.N679N                      | NA                               | rs2230755   | NA |
| chr12 | 99139154 | 99139156 | TTT       | -        | UTR3         | ANKS1B              | NA                | NA                                                            | NA                               | NA          | NA |
| chr12 | 1.01E+08 | 1.01E+08 | G         | T        | UTR3         | SLC17A8             | NA                | NA                                                            | NA                               | NA          | NA |
| chr12 | 1.01E+08 | 1.01E+08 | TTTTTTTTT | -        | UTR3         | SLC17A8             | NA                | NA                                                            | NA                               | rs71091442  | NA |
| chr12 | 1.01E+08 | 1.01E+08 | G         | A        | exonic       | ANO4                | nonsynonymous SNV | ANO4:NM_178826:exon6:c.G455A:p.R152K                          | NA                               | NA          | B  |
| chr12 | 1.01E+08 | 1.01E+08 | A         | C        | exonic       | ANO4                | nonsynonymous SNV | ANO4:NM_178826:exon6:c.A467C:p.Y156S                          | NA                               | rs201084190 | D  |

|       |          |          |      |        |              |              |                   |                                                                |                                 |             |    |
|-------|----------|----------|------|--------|--------------|--------------|-------------------|----------------------------------------------------------------|---------------------------------|-------------|----|
| chr12 | 1.02E+08 | 1.02E+08 | C    | A      | exonic       | ANO4         | nonsynonymous SNV | ANO4:NM_178826:exon22:c.C2177A:p.A726D                         | NA                              | NA          | P  |
| chr12 | 1.02E+08 | 1.02E+08 | G    | A      | exonic       | SLC5A8       | synonymous SNV    | SLC5A8:NM_145913:exon14:c.C1662T:p.Y554Y                       | NA                              | rs2671444   | NA |
| chr12 | 1.02E+08 | 1.02E+08 | C    | T      | UTR3         | UTP20        | NA                | NA                                                             | NA                              | rs3199856   | NA |
| chr12 | 1.03E+08 | 1.03E+08 | G    | A      | exonic       | PARPBP       | synonymous SNV    | PARPBP:NM_017915:exon2:c.G138A:p.A46A                          | NA                              | rs2036771   | NA |
| chr12 | 1.03E+08 | 1.03E+08 | -    | TG     | UTR3         | IGF1         | NA                | NA                                                             | NA                              | rs34621369  | NA |
| chr12 | 1.04E+08 | 1.04E+08 | G    | A      | exonic       | STAB2        | synonymous SNV    | STAB2:NM_017564:exon6:c.G558A:p.A186A                          | NA                              | rs147053330 | NA |
| chr12 | 1.04E+08 | 1.04E+08 | C    | T      | exonic       | STAB2        | synonymous SNV    | STAB2:NM_017564:exon31:c.C3339T:p.N1113N                       | )=COSM147590;OCCURENCE=1(stomac | rs703651    | NA |
| chr12 | 1.04E+08 | 1.04E+08 | A    | G      | UTR3         | NT5DC3       | NA                | NA                                                             | NA                              | rs10735389  | NA |
| chr12 | 1.04E+08 | 1.04E+08 | -    | A      | UTR3         | NT5DC3       | NA                | NA                                                             | NA                              | NA          | NA |
| chr12 | 1.04E+08 | 1.04E+08 | C    | T      | ncRNA_exonic | GNN          | NA                | NA                                                             | NA                              | rs11612613  | NA |
| chr12 | 1.05E+08 | 1.05E+08 | -    | A      | UTR3         | ALDH1L2      | NA                | NA                                                             | NA                              | rs36037315  | NA |
| chr12 | 1.06E+08 | 1.06E+08 | TT   | -      | UTR3         | NUAK1        | NA                | NA                                                             | NA                              | rs60661051  | NA |
| chr12 | 1.06E+08 | 1.06E+08 | -    | ATGAAG | UTR3         | NUAK1        | NA                | NA                                                             | NA                              | rs11283073  | NA |
| chr12 | 1.07E+08 | 1.07E+08 | T    | -      | UTR3         | CKAP4        | NA                | NA                                                             | NA                              | NA          | NA |
| chr12 | 1.07E+08 | 1.07E+08 | A    | G      | exonic       | CRY1         | synonymous SNV    | CRY1:NM_004075:exon5:c.T636C:p.G212G                           | NA                              | rs8192440   | NA |
| chr12 | 1.08E+08 | 1.08E+08 | A    | G      | UTR5         | BTBD11       | NA                | NA                                                             | NA                              | rs1107438   | NA |
| chr12 | 1.09E+08 | 1.09E+08 | C    | G      | exonic       | SELPLG       | nonsynonymous SNV | _001206609:exon2:c.G611C:p.G204A,SELPLG:NM_003006:exon2:c.G56  | NA                              | NA          | NA |
| chr12 | 1.1E+08  | 1.1E+08  | G    | A      | exonic       | ACACB        | nonsynonymous SNV | ACACB:NM_001093:exon46:c.G6421A:p.V2141I                       | NA                              | rs2075260   | NA |
| chr12 | 1.1E+08  | 1.1E+08  | TT   | -      | UTR3         | MMAB         | NA                | NA                                                             | NA                              | NA          | NA |
| chr12 | 1.12E+08 | 1.12E+08 | -    | T      | UTR3         | SH2B3        | NA                | NA                                                             | NA                              | NA          | NA |
| chr12 | 1.12E+08 | 1.12E+08 | T    | -      | UTR3         | ATXN2        | NA                | NA                                                             | NA                              | rs11348701  | NA |
| chr12 | 1.13E+08 | 1.13E+08 | T    | C      | UTR3         | TRAFD1       | NA                | NA                                                             | NA                              | rs149284206 | NA |
| chr12 | 1.13E+08 | 1.13E+08 | T    | G      | exonic       | HECTD4       | nonsynonymous SNV | HECTD4:NM_001109662:exon61:c.A10030C:p.T3344P                  | NA                              | NA          | NA |
| chr12 | 1.13E+08 | 1.13E+08 | ACAC | -      | UTR3         | RPH3A        | NA                | NA                                                             | NA                              | rs67569142  | NA |
| chr12 | 1.13E+08 | 1.13E+08 | T    | C      | exonic       | OAS3         | synonymous SNV    | OAS3:NM_006187:exon6:c.T1314C:p.I438I                          | NA                              | rs2285932   | NA |
| chr12 | 1.14E+08 | 1.14E+08 | G    | A      | UTR3         | RBM19        | NA                | NA                                                             | NA                              | rs7312304   | NA |
| chr12 | 1.14E+08 | 1.14E+08 | G    | C      | exonic       | RBM19        | synonymous SNV    | 3G:p.T606T,RBM19:NM_001146699:exon15:c.C1818G:p.T606T,RBM19    | NA                              | rs2290790   | NA |
| chr12 | 1.18E+08 | 1.18E+08 | A    | G      | exonic       | NOS1         | synonymous SNV    | _001204214:exon12:c.T1194C:p.I398I,NOS1:NM_000620:exon13:c.T22 | NA                              | rs2293054   | NA |
| chr12 | 1.18E+08 | 1.18E+08 | G    | C      | UTR3         | KSR2         | NA                | NA                                                             | NA                              | NA          | NA |
| chr12 | 1.18E+08 | 1.18E+08 | C    | G      | UTR3         | KSR2         | NA                | NA                                                             | NA                              | NA          | NA |
| chr12 | 1.18E+08 | 1.18E+08 | C    | A      | UTR3         | KSR2         | NA                | NA                                                             | NA                              | rs201802824 | NA |
| chr12 | 1.18E+08 | 1.18E+08 | A    | G      | UTR3         | KSR2         | NA                | NA                                                             | NA                              | rs11068502  | NA |
| chr12 | 1.19E+08 | 1.19E+08 | C    | T      | exonic       | TAOK3        | nonsynonymous SNV | TAOK3:NM_016281:exon4:c.G140A:p.S47N                           | NA                              | rs428073    | B  |
| chr12 | 1.19E+08 | 1.19E+08 | C    | T      | UTR3         | SUDS3        | NA                | NA                                                             | NA                              | NA          | NA |
| chr12 | 1.2E+08  | 1.2E+08  | A    | -      | UTR3         | SRRM4        | NA                | NA                                                             | NA                              | rs11305482  | NA |
| chr12 | 1.2E+08  | 1.2E+08  | G    | T      | exonic       | CCDC64       | nonsynonymous SNV | CCDC64:NM_207311:exon2:c.G438T:p.E146D                         | NA                              | NA          | D  |
| chr12 | 1.21E+08 | 1.21E+08 | A    | -      | UTR3         | MSI1         | NA                | NA                                                             | NA                              | NA          | NA |
| chr12 | 1.21E+08 | 1.21E+08 | -    | A      | UTR3         | GATC,SRSF9   | NA                | NA                                                             | NA                              | rs34136998  | NA |
| chr12 | 1.21E+08 | 1.21E+08 | T    | G      | UTR5         | DYNLL1       | NA                | NA                                                             | NA                              | rs12857     | NA |
| chr12 | 1.21E+08 | 1.21E+08 | G    | A      | ncRNA_exonic | HNF1A-AS1    | NA                | NA                                                             | NA                              | rs2254779   | NA |
| chr12 | 1.22E+08 | 1.22E+08 | T    | -      | UTR3         | TMEM120B     | NA                | NA                                                             | NA                              | NA          | NA |
| chr12 | 1.22E+08 | 1.22E+08 | C    | A      | UTR3         | TMEM120B     | NA                | NA                                                             | NA                              | NA          | NA |
| chr12 | 1.22E+08 | 1.22E+08 | A    | C      | exonic       | SETD1B       | synonymous SNV    | SETD1B:NM_015048:exon5:c.A1227C:p.P409P                        | NA                              | NA          | NA |
| chr12 | 1.23E+08 | 1.23E+08 | A    | G      | UTR3         | HCAR1        | NA                | NA                                                             | NA                              | rs7313367   | NA |
| chr12 | 1.23E+08 | 1.23E+08 | C    | A      | exonic       | ARL6IP4      | nonsynonymous SNV | 03A:p.Q335K,ARL6IP4:NM_016638:exon6:c.C970A:p.Q324K,ARL6IP4:1  | NA                              | NA          | D  |
| chr12 | 1.24E+08 | 1.24E+08 | T    | C      | UTR3         | SETD8        | NA                | NA                                                             | NA                              | rs61955129  | NA |
| chr12 | 1.24E+08 | 1.24E+08 | G    | A      | UTR3         | SETD8        | NA                | NA                                                             | NA                              | rs61953481  | NA |
| chr12 | 1.24E+08 | 1.24E+08 | A    | G      | UTR3         | SETD8        | NA                | NA                                                             | NA                              | rs142906941 | NA |
| chr12 | 1.25E+08 | 1.25E+08 | T    | C      | exonic       | NCOR2        | synonymous SNV    | :p.R1643R,NCOR2:NM_001206654:exon35:c.A4929G:p.R1643R,NCOR:    | NA                              | rs2230942   | NA |
| chr12 | 1.25E+08 | 1.25E+08 | C    | T      | exonic       | NCOR2        | synonymous SNV    | \:p.L1531L,NCOR2:NM_001206654:exon33:c.G4593A:p.L1531L,NCOR2   | NA                              | rs1263992   | NA |
| chr12 | 1.25E+08 | 1.25E+08 | A    | G      | exonic       | NCOR2        | synonymous SNV    | iC:p.A901A,NCOR2:NM_001206654:exon21:c.T2703C:p.A901A,NCOR2    | NA                              | rs7961196   | NA |
| chr12 | 1.29E+08 | 1.29E+08 | G    | A      | exonic       | TMEM132C     | nonsynonymous SNV | TMEM132C:NM_001136103:exon5:c.G1330A:p.V444I                   | NA                              | rs4272850   | NA |
| chr12 | 1.29E+08 | 1.29E+08 | A    | G      | UTR3         | TMEM132C     | NA                | NA                                                             | NA                              | NA          | NA |
| chr12 | 1.31E+08 | 1.31E+08 | -    | T      | ncRNA_exonic | LOC100190940 | NA                | NA                                                             | NA                              | NA          | NA |
| chr12 | 1.31E+08 | 1.31E+08 | G    | T      | UTR5         | GPR133       | NA                | NA                                                             | NA                              | rs56090874  | NA |
| chr12 | 1.32E+08 | 1.32E+08 | G    | T      | exonic       | ULK1         | nonsynonymous SNV | ULK1:NM_003565:exon22:c.G2234T:p.G745V                         | NA                              | rs34936984  | D  |
| chr12 | 1.32E+08 | 1.32E+08 | A    | G      | exonic       | ULK1         | nonsynonymous SNV | ULK1:NM_003565:exon23:c.A2446G:p.T816A                         | NA                              | rs11609348  | NA |
| chr12 | 1.33E+08 | 1.33E+08 | -    | TT     | UTR3         | DDX51        | NA                | NA                                                             | NA                              | rs112928855 | NA |
| chr12 | 1.33E+08 | 1.33E+08 | T    | C      | exonic       | P2RX2        | synonymous SNV    | 1_016318:exon4:c.T396C:p.T132T,P2RX2:NM_170682:exon5:c.T468C:1 | NA                              | rs7964634   | NA |
| chr12 | 1.33E+08 | 1.33E+08 | AA   | -      | UTR3         | GOLGA3       | NA                | NA                                                             | NA                              | rs139681552 | NA |
| chr12 | 1.33E+08 | 1.33E+08 | T    | G      | exonic       | GOLGA3       | nonsynonymous SNV | GOLGA3:NM_005895:exon23:c.A4178C:p.N1393T                      | NA                              | NA          | B  |
| chr12 | 1.34E+08 | 1.34E+08 | A    | G      | UTR3         | ZNF605       | NA                | NA                                                             | NA                              | rs61951591  | NA |
| chr12 | 1.34E+08 | 1.34E+08 | G    | T      | UTR3         | ZNF26        | NA                | NA                                                             | NA                              | NA          | NA |
| chr12 | 1.34E+08 | 1.34E+08 | G    | A      | UTR5         | ZNF84        | NA                | NA                                                             | NA                              | rs10870574  | NA |
| chr13 | 19409503 | 19409503 | T    | C      | ncRNA_exonic | ANKRD20A9P   | NA                | NA                                                             | NA                              | rs141688139 | NA |
| chr13 | 19409611 | 19409611 | T    | C      | ncRNA_exonic | ANKRD20A9P   | NA                | NA                                                             | NA                              | rs200316004 | NA |

|       |          |          |          |    |              |                       |                   |                                                                                              |    |             |    |
|-------|----------|----------|----------|----|--------------|-----------------------|-------------------|----------------------------------------------------------------------------------------------|----|-------------|----|
| chr13 | 19418641 | 19418641 | T        | -  | ncRNA_exonic | ANKRD20A9P            | NA                | NA                                                                                           | NA | NA          | NA |
| chr13 | 19431858 | 19431858 | T        | -  | ncRNA_exonic | ANKRD20A9P            | NA                | NA                                                                                           | NA | rs33949959  | NA |
| chr13 | 19442031 | 19442031 | C        | A  | ncRNA_exonic | ANKRD20A9P            | NA                | NA                                                                                           | NA | rs2997166   | NA |
| chr13 | 21348028 | 21348028 | A        | C  | UTR5         | N6AMT2                | NA                | NA                                                                                           | NA | NA          | NA |
| chr13 | 23755127 | 23755127 | G        | A  | UTR5         | SGCG                  | NA                | NA                                                                                           | NA | rs4770403   | NA |
| chr13 | 23808782 | 23808782 | T        | C  | exonic       | SGCG                  | synonymous SNV    | SGCG:NM_000231:exon3:c.T228C:p.D76D                                                          | NA | rs1800350   | NA |
| chr13 | 25161438 | 25161438 | T        | A  | ncRNA_exonic | TPTE2P6               | NA                | NA                                                                                           | NA | rs3869320   | NA |
| chr13 | 25356053 | 25356053 | T        | C  | exonic       | RNF17                 | synonymous SNV    | I_001184993:exon6:c.T582C:p.F194F,RNF17:NM_031277:exon6:c.T58                                | NA | rs9707144   | NA |
| chr13 | 25505593 | 25505593 | T        | G  | ncRNA_exonic | TPTE2P1               | NA                | NA                                                                                           | NA | rs9553473   | NA |
| chr13 | 26125490 | 26125490 | G        | A  | exonic       | ATP8A2                | synonymous SNV    | ATP8A2:NM_016529:exon11:c.G906A:p.A302A                                                      | NA | rs9581388   | NA |
| chr13 | 27847807 | 27847807 | G        | T  | UTR3         | RASL11A               | NA                | NA                                                                                           | NA | NA          | NA |
| chr13 | 28867525 | 28867529 | TTTTT    | -  | UTR3         | PAN3                  | NA                | NA                                                                                           | NA | NA          | NA |
| chr13 | 28867565 | 28867565 | A        | G  | UTR3         | PAN3                  | NA                | NA                                                                                           | NA | NA          | NA |
| chr13 | 28874659 | 28874666 | CACACACA | -  | UTR3         | FLT1                  | NA                | NA                                                                                           | NA | rs200186804 | NA |
| chr13 | 28961961 | 28961961 | G        | A  | UTR3         | FLT1                  | NA                | NA                                                                                           | NA | rs199630957 | NA |
| chr13 | 30779887 | 30779887 | -        | TG | UTR3         | KATNAL1               | NA                | NA                                                                                           | NA | NA          | NA |
| chr13 | 31035091 | 31035091 | T        | -  | UTR3         | HMGB1                 | NA                | NA                                                                                           | NA | rs138159768 | NA |
| chr13 | 31735759 | 31735759 | G        | A  | UTR5         | HSPH1                 | NA                | NA                                                                                           | NA | rs2280059   | NA |
| chr13 | 32745397 | 32745397 | G        | A  | exonic       | FRY                   | nonsynonymous SNV | FRY:NM_023037:exon18:c.G2141A:p.R714K                                                        | NA | NA          | B  |
| chr13 | 32890572 | 32890572 | G        | A  | UTR5         | BRCA2                 | NA                | NA                                                                                           | NA | rs1799943   | NA |
| chr13 | 36744800 | 36744800 | G        | A  | exonic       | CCDC169-SOHLH2,SOHLH2 | synonymous SNV    | :6:exon10:c.C1125T:p.Y375Y,CCDC169-SOHLH2:NM_001198910:exon10)=COSM147666;OCCURENCE=1(stomac | NA | rs2296967   | NA |
| chr13 | 36805290 | 36805290 | A        | -  | UTR3         | CCDC169               | NA                | NA                                                                                           | NA | rs67328439  | NA |
| chr13 | 36920918 | 36920918 | C        | G  | ncRNA_UTR5   | SPG20                 | NA                | NA                                                                                           | NA | rs9531842   | NA |
| chr13 | 37271429 | 37271430 | CA       | -  | UTR3         | SERTM1                | NA                | NA                                                                                           | NA | rs58941896  | NA |
| chr13 | 39623185 | 39623185 | T        | -  | UTR3         | NHLRC3                | NA                | NA                                                                                           | NA | NA          | NA |
| chr13 | 40922821 | 40922821 | A        | -  | ncRNA_exonic | LINC00598             | NA                | NA                                                                                           | NA | rs112830018 | NA |
| chr13 | 41133064 | 41133064 | -        | T  | UTR3         | FOXO1                 | NA                | NA                                                                                           | NA | NA          | NA |
| chr13 | 41385658 | 41385658 | C        | A  | ncRNA_UTR3   | SLC25A15              | NA                | NA                                                                                           | NA | rs41515050  | NA |
| chr13 | 41703785 | 41703785 | C        | T  | UTR3         | KBTBD6                | NA                | NA                                                                                           | NA | NA          | NA |
| chr13 | 43148313 | 43148313 | C        | G  | UTR5         | TNFSF11               | NA                | NA                                                                                           | NA | rs9533157   | NA |
| chr13 | 43639845 | 43639845 | A        | C  | exonic       | DNAJC15               | synonymous SNV    | DNAJC15:NM_013238:exon2:c.A132C:p.G44G                                                       | NA | rs3783044   | NA |
| chr13 | 43681661 | 43681666 | ACACAC   | -  | UTR3         | DNAJC15               | NA                | NA                                                                                           | NA | rs72088427  | NA |
| chr13 | 43787681 | 43787683 | TTT      | -  | UTR3         | ENOX1                 | NA                | NA                                                                                           | NA | NA          | NA |
| chr13 | 45915481 | 45915481 | A        | C  | ncRNA_exonic | TPT1-AS1              | NA                | NA                                                                                           | NA | rs12872310  | NA |
| chr13 | 45915500 | 45915500 | C        | T  | ncRNA_exonic | TPT1-AS1              | NA                | NA                                                                                           | NA | rs12872567  | NA |
| chr13 | 46537757 | 46537757 | G        | A  | UTR3         | ZC3H13                | NA                | NA                                                                                           | NA | rs17350833  | NA |
| chr13 | 48669146 | 48669146 | A        | C  | exonic       | MED4                  | synonymous SNV    | MED4:NM_014166:exon1:c.T69G:p.G23G                                                           | NA | NA          | NA |
| chr13 | 50102992 | 50102992 | T        | C  | UTR3         | PHF11                 | NA                | NA                                                                                           | NA | rs3033      | NA |
| chr13 | 50466774 | 50466774 | G        | A  | ncRNA_exonic | CTAGE10P              | NA                | NA                                                                                           | NA | rs58542163  | NA |
| chr13 | 50466780 | 50466780 | C        | T  | ncRNA_exonic | CTAGE10P              | NA                | NA                                                                                           | NA | rs189224500 | NA |
| chr13 | 50588496 | 50588496 | T        | C  | ncRNA_UTR3   | TRIM13                | NA                | NA                                                                                           | NA | rs199807501 | NA |
| chr13 | 52390790 | 52390791 | TG       | -  | ncRNA_exonic | LINC00282             | NA                | NA                                                                                           | NA | rs151038091 | NA |
| chr13 | 58302675 | 58302676 | GC       | -  | UTR3         | PCDH17                | NA                | NA                                                                                           | NA | NA          | NA |
| chr13 | 58302684 | 58302684 | T        | A  | UTR3         | PCDH17                | NA                | NA                                                                                           | NA | NA          | NA |
| chr13 | 60240491 | 60240491 | -        | A  | UTR3         | DIAPH3                | NA                | NA                                                                                           | NA | NA          | NA |
| chr13 | 70713512 | 70713512 | A        | G  | ncRNA_exonic | ATXN8OS               | NA                | NA                                                                                           | NA | rs2021426   | NA |
| chr13 | 73329358 | 73329358 | G        | A  | UTR3         | BORA                  | NA                | NA                                                                                           | NA | rs10887     | NA |
| chr13 | 73369642 | 73369642 | A        | G  | exonic       | PIBF1                 | nonsynonymous SNV | PIBF1:NM_006346:exon4:c.A499G:p.I167V                                                        | NA | rs1372000   | B  |
| chr13 | 77458312 | 77458312 | G        | C  | UTR3         | KCTD12                | NA                | NA                                                                                           | NA | NA          | NA |
| chr13 | 77619037 | 77619037 | T        | -  | UTR3         | MYCBP2                | NA                | NA                                                                                           | NA | rs56131306  | NA |
| chr13 | 78216915 | 78216915 | C        | T  | exonic       | SCEL                  | synonymous SNV    | 396T:p.H632H,SCEL:NM_003843:exon31:c.C1962T:p.H654H,SCEL:NM_                                 | NA | rs2813739   | NA |
| chr13 | 79894106 | 79894106 | G        | -  | UTR3         | RBM26                 | NA                | NA                                                                                           | NA | NA          | NA |
| chr13 | 79894118 | 79894118 | C        | T  | UTR3         | RBM26                 | NA                | NA                                                                                           | NA | NA          | NA |
| chr13 | 79894162 | 79894162 | A        | T  | UTR3         | RBM26                 | NA                | NA                                                                                           | NA | NA          | NA |
| chr13 | 84451509 | 84451509 | A        | -  | UTR3         | SLITRK1               | NA                | NA                                                                                           | NA | rs66938370  | NA |
| chr13 | 96230279 | 96230279 | T        | G  | UTR3         | CLDN10                | NA                | NA                                                                                           | NA | rs1325774   | NA |
| chr13 | 96232591 | 96232591 | A        | -  | UTR3         | DZIP1                 | NA                | NA                                                                                           | NA | NA          | NA |
| chr13 | 98118464 | 98118464 | A        | -  | UTR3         | RAP2A                 | NA                | NA                                                                                           | NA | rs61387793  | NA |
| chr13 | 1.01E+08 | 1.01E+08 | T        | -  | UTR3         | CLYBL                 | NA                | NA                                                                                           | NA | NA          | NA |
| chr13 | 1.01E+08 | 1.01E+08 | TATTTAT  | -  | UTR3         | GGACT                 | NA                | NA                                                                                           | NA | rs10581954  | NA |
| chr13 | 1.03E+08 | 1.03E+08 | TTTTTT   | -  | UTR3         | TPP2                  | NA                | NA                                                                                           | NA | rs202012610 | NA |
| chr13 | 1.03E+08 | 1.03E+08 | AA       | -  | UTR3         | BIVM                  | NA                | NA                                                                                           | NA | NA          | NA |
| chr13 | 1.04E+08 | 1.04E+08 | -        | T  | ncRNA_exonic | METTTL21EP            | NA                | NA                                                                                           | NA | NA          | NA |
| chr13 | 1.04E+08 | 1.04E+08 | CA       | -  | ncRNA_exonic | METTTL21EP            | NA                | NA                                                                                           | NA | NA          | NA |
| chr13 | 1.09E+08 | 1.09E+08 | CTCT     | -  | UTR5         | FAM155A               | NA                | NA                                                                                           | NA | rs35028871  | NA |
| chr13 | 1.1E+08  | 1.1E+08  | T        | C  | exonic       | MYO16                 | synonymous SNV    | .001198950:exon12:c.T1413C:p.I471I,MYO16:NM_015011:exon12:c.T1                               | NA | rs9559428   | NA |

|       |          |          |         |          |              |                      |                   |                                                               |    |             |    |
|-------|----------|----------|---------|----------|--------------|----------------------|-------------------|---------------------------------------------------------------|----|-------------|----|
| chr13 | 1.11E+08 | 1.11E+08 | G       | A        | exonic       | COL4A2               | nonsynonymous SNV | COL4A2:NM_001846:exon22:c.G1550A:p.R517K                      | NA | rs7990383   | B  |
| chr13 | 1.11E+08 | 1.11E+08 | T       | C        | exonic       | CARS2                | synonymous SNV    | CARS2:NM_024537:exon8:c.A852G:p.E284E                         | NA | rs4628819   | NA |
| chr13 | 1.12E+08 | 1.12E+08 | C       | T        | exonic       | ARHGFE7              | synonymous SNV    | C198T:p.S66S,ARHGFE7:NM_003899:exon4:c.C198T:p.S66S,ARHGFE7:I | NA | rs41275140  | NA |
| chr13 | 1.12E+08 | 1.12E+08 | AA      | -        | UTR3         | ARHGFE7              | NA                | NA                                                            | NA | rs202074614 | NA |
| chr13 | 1.14E+08 | 1.14E+08 | ACAC    | -        | UTR3         | ATP11A               | NA                | NA                                                            | NA | rs72007310  | NA |
| chr13 | 1.14E+08 | 1.14E+08 | AT      | -        | UTR3         | ATP11A               | NA                | NA                                                            | NA | rs3832908   | NA |
| chr13 | 1.14E+08 | 1.14E+08 | C       | A        | UTR3         | DCUN1D2              | NA                | NA                                                            | NA | rs9577553   | NA |
| chr13 | 1.14E+08 | 1.14E+08 | C       | T        | exonic       | TMCO3                | nonsynonymous SNV | TMCO3:NM_017905:exon9:c.C1414T:p.L472F                        | NA | rs77834374  | P  |
| chr13 | 1.14E+08 | 1.14E+08 | A       | T        | exonic       | TMCO3                | nonsynonymous SNV | TMCO3:NM_017905:exon9:c.A1419T:p.L473F                        | NA | NA          | P  |
| chr13 | 1.14E+08 | 1.14E+08 | -       | GTGTGCAC | ncRNA_exonic | LINC00552            | NA                | NA                                                            | NA | NA          | NA |
| chr14 | 20811332 | 20811332 | C       | T        | ncRNA_exonic | RPPH1                | NA                | NA                                                            | NA | rs3093872   | NA |
| chr14 | 20811476 | 20811476 | -       | A        | ncRNA_exonic | RPPH1                | NA                | NA                                                            | NA | NA          | NA |
| chr14 | 20822308 | 20822308 | A       | G        | exonic       | PARP2                | nonsynonymous SNV | _001042618:exon8:c.A665G:p.D222G,PARP2:NM_005484:exon8:c.A70- | NA | rs3093921   | P  |
| chr14 | 21965670 | 21965670 | G       | T        | UTR3         | TOX4                 | NA                | NA                                                            | NA | NA          | NA |
| chr14 | 21965672 | 21965672 | T       | G        | UTR3         | TOX4                 | NA                | NA                                                            | NA | rs28506904  | NA |
| chr14 | 21965689 | 21965689 | T       | G        | UTR3         | TOX4                 | NA                | NA                                                            | NA | NA          | NA |
| chr14 | 23304057 | 23304057 | A       | -        | UTR3         | MRPL52               | NA                | NA                                                            | NA | rs56341631  | NA |
| chr14 | 23352465 | 23352470 | GCACAC  | -        | UTR5         | REM2                 | NA                | NA                                                            | NA | rs72363604  | NA |
| chr14 | 23530622 | 23530622 | T       | C        | exonic       | ACIN1                | synonymous SNV    | 3:p.S403S,ACIN1:NM_001164815:exon16:c.A3363G:p.S1121S,ACIN1:N | NA | rs60168438  | NA |
| chr14 | 23652346 | 23652346 | -       | AA       | UTR5         | SLC7A8               | NA                | NA                                                            | NA | NA          | NA |
| chr14 | 23795205 | 23795205 | T       | -        | UTR3         | BCL2L2-PABPN1,PABPN1 | NA                | NA                                                            | NA | rs71119016  | NA |
| chr14 | 24408866 | 24408866 | G       | A        | ncRNA_exonic | DHRS4-AS1            | NA                | NA                                                            | NA | rs1885810   | NA |
| chr14 | 24409799 | 24409799 | A       | G        | ncRNA_exonic | DHRS4-AS1            | NA                | NA                                                            | NA | rs113551151 | NA |
| chr14 | 24410262 | 24410262 | C       | G        | ncRNA_exonic | DHRS4-AS1            | NA                | NA                                                            | NA | rs58941536  | NA |
| chr14 | 24837338 | 24837338 | G       | -        | UTR5         | NFATC4               | NA                | NA                                                            | NA | rs3215609   | NA |
| chr14 | 24899194 | 24899194 | C       | T        | UTR5         | KHNYN                | NA                | NA                                                            | NA | rs10146759  | NA |
| chr14 | 25103414 | 25103414 | G       | A        | UTR5         | GZMB                 | NA                | NA                                                            | NA | rs2273844   | NA |
| chr14 | 31344039 | 31344039 | A       | G        | UTR5         | COCH                 | NA                | NA                                                            | NA | rs11555426  | NA |
| chr14 | 31364292 | 31364292 | G       | A        | UTR3         | STRN3                | NA                | NA                                                            | NA | NA          | NA |
| chr14 | 31364323 | 31364323 | G       | A        | UTR3         | STRN3                | NA                | NA                                                            | NA | NA          | NA |
| chr14 | 31647241 | 31647241 | G       | A        | exonic       | HECTD1               | synonymous SNV    | HECTD1:NM_015382:exon3:c.C360T:p.A120A                        | NA | rs2274201   | NA |
| chr14 | 34272917 | 34272919 | AAA     | -        | UTR3         | NPAS3                | NA                | NA                                                            | NA | rs146767978 | NA |
| chr14 | 34394149 | 34394149 | -       | AA       | UTR3         | EGLN3                | NA                | NA                                                            | NA | NA          | NA |
| chr14 | 38678356 | 38678356 | G       | A        | UTR5         | SSTR1                | NA                | NA                                                            | NA | rs12437095  | NA |
| chr14 | 39867658 | 39867658 | G       | T        | UTR3         | FBXO33               | NA                | NA                                                            | NA | rs201516221 | NA |
| chr14 | 39867669 | 39867669 | C       | T        | UTR3         | FBXO33               | NA                | NA                                                            | NA | rs202105812 | NA |
| chr14 | 50092078 | 50092078 | A       | -        | UTR3         | DNAAF2               | NA                | NA                                                            | NA | NA          | NA |
| chr14 | 50361154 | 50361154 | G       | T        | UTR3         | ARF6                 | NA                | NA                                                            | NA | NA          | NA |
| chr14 | 50361173 | 50361174 | TT      | -        | UTR3         | ARF6                 | NA                | NA                                                            | NA | NA          | NA |
| chr14 | 50448984 | 50448984 | A       | C        | UTR3         | C14orf182            | NA                | NA                                                            | NA | rs7161196   | NA |
| chr14 | 53241309 | 53241309 | -       | T        | UTR3         | STYX                 | NA                | NA                                                            | NA | NA          | NA |
| chr14 | 54416602 | 54416602 | T       | A        | UTR3         | BMP4                 | NA                | NA                                                            | NA | rs76335800  | NA |
| chr14 | 55429883 | 55429883 | C       | A        | exonic       | WDHD1                | nonsynonymous SNV | 01008396:exon18:c.G1949T:p.C650F,WDHD1:NM_007086:exon19:c.G   | NA | NA          | D  |
| chr14 | 55429886 | 55429886 | G       | A        | exonic       | WDHD1                | nonsynonymous SNV | 01008396:exon18:c.C1946T:p.S649F,WDHD1:NM_007086:exon19:c.C   | NA | NA          | D  |
| chr14 | 55533924 | 55533925 | TT      | -        | UTR3         | MAPK1IP1L            | NA                | NA                                                            | NA | NA          | NA |
| chr14 | 55864146 | 55864146 | G       | A        | exonic       | ATG14                | synonymous SNV    | ATG14:NM_014924:exon2:c.C228T:p.I76I                          | NA | rs61743178  | NA |
| chr14 | 56249141 | 56249141 | -       | T        | ncRNA_exonic | LINC00520            | NA                | NA                                                            | NA | NA          | NA |
| chr14 | 56767165 | 56767165 | T       | -        | UTR3         | PELI2                | NA                | NA                                                            | NA | NA          | NA |
| chr14 | 57396821 | 57396821 | T       | C        | ncRNA_exonic | OTX2-AS1             | NA                | NA                                                            | NA | NA          | NA |
| chr14 | 57396858 | 57396858 | T       | C        | ncRNA_exonic | OTX2-AS1             | NA                | NA                                                            | NA | rs199531630 | NA |
| chr14 | 57396873 | 57396873 | T       | C        | ncRNA_exonic | OTX2-AS1             | NA                | NA                                                            | NA | rs12894513  | NA |
| chr14 | 57396877 | 57396877 | T       | C        | ncRNA_exonic | OTX2-AS1             | NA                | NA                                                            | NA | NA          | NA |
| chr14 | 57396889 | 57396892 | TTTC    | -        | ncRNA_exonic | OTX2-AS1             | NA                | NA                                                            | NA | rs150682540 | NA |
| chr14 | 57396893 | 57396893 | T       | C        | ncRNA_exonic | OTX2-AS1             | NA                | NA                                                            | NA | NA          | NA |
| chr14 | 57396901 | 57396901 | T       | C        | ncRNA_exonic | OTX2-AS1             | NA                | NA                                                            | NA | NA          | NA |
| chr14 | 57396905 | 57396905 | T       | C        | ncRNA_exonic | OTX2-AS1             | NA                | NA                                                            | NA | NA          | NA |
| chr14 | 57396919 | 57396919 | T       | C        | ncRNA_exonic | OTX2-AS1             | NA                | NA                                                            | NA | rs28595791  | NA |
| chr14 | 57396928 | 57396929 | TT      | -        | ncRNA_exonic | OTX2-AS1             | NA                | NA                                                            | NA | NA          | NA |
| chr14 | 57396935 | 57396935 | C       | T        | ncRNA_exonic | OTX2-AS1             | NA                | NA                                                            | NA | NA          | NA |
| chr14 | 57396937 | 57396938 | CC      | -        | ncRNA_exonic | OTX2-AS1             | NA                | NA                                                            | NA | NA          | NA |
| chr14 | 60759367 | 60759367 | -       | T        | UTR3         | PPM1A                | NA                | NA                                                            | NA | NA          | NA |
| chr14 | 61177729 | 61177729 | -       | TATATA   | UTR3         | SIX4                 | NA                | NA                                                            | NA | rs142920801 | NA |
| chr14 | 61190053 | 61190053 | T       | G        | exonic       | SIX4                 | nonsynonymous SNV | SIX4:NM_017420:exon1:c.A740C:p.Y247S                          | NA | NA          | D  |
| chr14 | 61745694 | 61745697 | CACA    | -        | UTR3         | TMEM30B              | NA                | NA                                                            | NA | NA          | NA |
| chr14 | 64693058 | 64693058 | C       | G        | UTR3         | SYNE2                | NA                | NA                                                            | NA | NA          | NA |
| chr14 | 64937308 | 64937317 | AAAAAAA | -        | UTR3         | AKAP5                | NA                | NA                                                            | NA | NA          | NA |

|       |          |          |        |          |                |                                    |                   |                                                                                       |                                 |             |    |
|-------|----------|----------|--------|----------|----------------|------------------------------------|-------------------|---------------------------------------------------------------------------------------|---------------------------------|-------------|----|
| chr14 | 64937889 | 64937889 | G      | T        | UTR3           | AKAP5                              | NA                | NA                                                                                    | NA                              | rs75057565  | NA |
| chr14 | 65213611 | 65213611 | A      | -        | UTR3           | SPTB                               | NA                | NA                                                                                    | NA                              | NA          | NA |
| chr14 | 65399263 | 65399263 | A      | G        | UTR3           | CHURC1                             | NA                | NA                                                                                    | NA                              | rs8943      | NA |
| chr14 | 65399306 | 65399306 | G      | A        | UTR3           | CHURC1                             | NA                | NA                                                                                    | NA                              | rs8984      | NA |
| chr14 | 65400265 | 65400265 | C      | T        | UTR3           | CHURC1                             | NA                | NA                                                                                    | NA                              | rs1064108   | NA |
| chr14 | 65400745 | 65400745 | -      | A        | UTR3           | CHURC1                             | NA                | NA                                                                                    | NA                              | rs35743220  | NA |
| chr14 | 65400785 | 65400786 | GT     | -        | UTR3           | CHURC1                             | NA                | NA                                                                                    | NA                              | rs141703694 | NA |
| chr14 | 68144049 | 68144049 | G      | A        | UTR3           | RDH11                              | NA                | NA                                                                                    | NA                              | NA          | NA |
| chr14 | 69255652 | 69255652 | G      | T        | UTR3           | ZFP36L1                            | NA                | NA                                                                                    | NA                              | rs6739      | NA |
| chr14 | 69255656 | 69255658 | GGT    | -        | UTR3           | ZFP36L1                            | NA                | NA                                                                                    | NA                              | rs138429203 | NA |
| chr14 | 69255660 | 69255660 | G      | C        | UTR3           | ZFP36L1                            | NA                | NA                                                                                    | NA                              | rs10656     | NA |
| chr14 | 69352230 | 69352230 | G      | A        | exonic         | ACTN1                              | synonymous SNV    | p.L433L,ACTN1:NM_001130004:exon12:c.C1297T;p.L433L,ACTN1:NM_001130004:exon12:c.C1297T | NA                              | rs15993     | NA |
| chr14 | 69926273 | 69926273 | -      | T        | UTR3           | SLC39A9                            | NA                | NA                                                                                    | NA                              | NA          | NA |
| chr14 | 70233152 | 70233152 | -      | A        | ncRNA_exonic   | LOC100289511                       | NA                | NA                                                                                    | NA                              | rs138453813 | NA |
| chr14 | 70546744 | 70546744 | G      | A        | UTR5           | SLC8A3                             | NA                | NA                                                                                    | NA                              | rs72729857  | NA |
| chr14 | 70834315 | 70834315 | G      | A        | UTR3           | SYNJ2BP                            | NA                | NA                                                                                    | NA                              | NA          | NA |
| chr14 | 70834325 | 70834325 | C      | T        | UTR3           | SYNJ2BP                            | NA                | NA                                                                                    | NA                              | NA          | NA |
| chr14 | 70834332 | 70834332 | G      | A        | UTR3           | SYNJ2BP                            | NA                | NA                                                                                    | NA                              | NA          | NA |
| chr14 | 73422350 | 73422350 | T      | G        | exonic         | DCAF4                              | synonymous SNV    | .S2755,DCAF4:NM_001163508:exon12:c.T1107G;p.S369S,DCAF4:NM_001163508:exon12:c.T1107G  | NA                              | rs2806034   | NA |
| chr14 | 73459917 | 73459917 | C      | T        | exonic         | ZFYVE1                             | synonymous SNV    | ZFYVE1:NM_021260:exon4:c.G1137A;p.E379E                                               | NA                              | rs2333016   | NA |
| chr14 | 73959703 | 73959703 | -      | T        | UTR3           | C14orf169                          | NA                | NA                                                                                    | NA                              | NA          | NA |
| chr14 | 74168648 | 74168649 | AAA    | -        | UTR3           | DNAL1                              | NA                | NA                                                                                    | NA                              | rs147918155 | NA |
| chr14 | 74183386 | 74183391 | AAAAAA | -        | UTR3           | ELMSAN1                            | NA                | NA                                                                                    | NA                              | NA          | NA |
| chr14 | 74815239 | 74815239 | C      | T        | UTR5           | VRTN                               | NA                | NA                                                                                    | NA                              | rs2286425   | NA |
| chr14 | 75388803 | 75388803 | G      | A        | UTR5           | RPS6KL1                            | NA                | NA                                                                                    | NA                              | rs7158047   | NA |
| chr14 | 77491190 | 77491190 | -      | AG       | UTR3           | IRF2BPL                            | NA                | NA                                                                                    | NA                              | rs200696373 | NA |
| chr14 | 77599140 | 77599140 | -      | TCTCTCTC | UTR3           | ZDHHC22                            | NA                | NA                                                                                    | NA                              | NA          | NA |
| chr14 | 77648238 | 77648240 | GTG    | -        | splicing       | TMEM63C                            | NA                | NA                                                                                    | NA                              | rs35484514  | NA |
| chr14 | 77973676 | 77973676 | T      | -        | UTR3           | SPTLC2                             | NA                | NA                                                                                    | NA                              | NA          | NA |
| chr14 | 78390839 | 78390839 | T      | G        | exonic         | ADCK1                              | nonsynonymous SNV | _001142545:exon7:c.T694G;p.F232V,ADCK1:NM_020421:exon8:c.T89G                         | NA                              | NA          | D  |
| chr14 | 78390880 | 78390880 | T      | C        | exonic         | ADCK1                              | synonymous SNV    | _001142545:exon7:c.T735C;p.N245N,ADCK1:NM_020421:exon8:c.T93G                         | NA                              | rs2302944   | NA |
| chr14 | 80678116 | 80678116 | G      | T        | ncRNA_intronic | DIO2-AS1                           | NA                | NA                                                                                    | NA                              | NA          | NA |
| chr14 | 81940588 | 81940588 | -      | A        | UTR3           | SEL1L                              | NA                | NA                                                                                    | NA                              | NA          | NA |
| chr14 | 81942830 | 81942830 | T      | -        | UTR3           | SEL1L                              | NA                | NA                                                                                    | NA                              | NA          | NA |
| chr14 | 88647752 | 88647752 | A      | G        | UTR3           | KCNK10                             | NA                | NA                                                                                    | NA                              | rs72698030  | NA |
| chr14 | 88852166 | 88852166 | G      | A        | exonic         | SPATA7                             | nonsynonymous SNV | :NM_001040428:exon1:c.G4A;p.D2N,SPATA7:NM_018418:exon1:c.G4A                          | NA                              | rs4904448   | P  |
| chr14 | 89622979 | 89622979 | -      | T        | UTR3           | FOXN3                              | NA                | NA                                                                                    | NA                              | NA          | NA |
| chr14 | 89626561 | 89626561 | G      | A        | UTR3           | FOXN3                              | NA                | NA                                                                                    | NA                              | rs11627037  | NA |
| chr14 | 89627901 | 89627904 | GTGT   | -        | UTR3           | FOXN3                              | NA                | NA                                                                                    | NA                              | NA          | NA |
| chr14 | 92041294 | 92041294 | A      | G        | intergenic     | 1(dist=64650),CATSPERB(dist=64650) | NA                | NA                                                                                    | NA                              | rs1743066   | NA |
| chr14 | 92582472 | 92582472 | G      | A        | UTR3           | NDUFB1                             | NA                | NA                                                                                    | NA                              | rs13350     | NA |
| chr14 | 94749972 | 94749972 | A      | G        | UTR3           | SERPINA10                          | NA                | NA                                                                                    | NA                              | rs12793     | NA |
| chr14 | 94776221 | 94776221 | A      | C        | exonic         | SERPINA6                           | nonsynonymous SNV | SERPINA6:NM_001756:exon3:c.T736G;p.S246A                                              | NA                              | rs2228541   | B  |
| chr14 | 94912896 | 94912896 | T      | G        | exonic         | SERPINA11                          | nonsynonymous SNV | SERPINA11:NM_001080451:exon3:c.A689C;p.E230A                                          | NA                              | rs57740714  | D  |
| chr14 | 94933709 | 94933709 | C      | T        | exonic         | SERPINA9                           | synonymous SNV    | _175739:exon3:c.G693A;p.E231E,SERPINA9:NM_001042518:exon4:c.C693A                     | NA                              | rs6575433   | NA |
| chr14 | 95107973 | 95107973 | C      | T        | ncRNA_exonic   | SERPINA13P                         | NA                | NA                                                                                    | NA                              | rs4905226   | NA |
| chr14 | 95655319 | 95655319 | -      | A        | UTR3           | CLMN                               | NA                | NA                                                                                    | NA                              | NA          | NA |
| chr14 | 95657743 | 95657743 | -      | A        | UTR3           | CLMN                               | NA                | NA                                                                                    | NA                              | NA          | NA |
| chr14 | 96000550 | 96000550 | A      | C        | ncRNA_exonic   | SNHG10                             | NA                | NA                                                                                    | NA                              | NA          | NA |
| chr14 | 96152836 | 96152836 | T      | G        | exonic         | TCL1B                              | nonsynonymous SNV | TCL1B:NM_004918:exon1:c.T32G;p.V11G                                                   | NA                              | NA          | B  |
| chr14 | 96871104 | 96871104 | G      | A        | exonic         | AK7                                | nonsynonymous SNV | AK7:NM_152327:exon3:c.G305A;p.R102Q                                                   | NA                              | rs2275554   | P  |
| chr14 | 1.01E+08 | 1.01E+08 | A      | T        | UTR5           | WARS                               | NA                | NA                                                                                    | NA                              | rs7143006   | NA |
| chr14 | 1.05E+08 | 1.05E+08 | G      | A        | exonic         | ASPG                               | nonsynonymous SNV | ASPG:NM_001080464:exon2:c.G161A;p.R54H                                                | NA                              | rs201325717 | NA |
| chr14 | 1.05E+08 | 1.05E+08 | T      | C        | exonic         | KIF26A                             | synonymous SNV    | KIF26A:NM_015656:exon12:c.T2487C;p.G829G                                              | NA                              | rs4906422   | NA |
| chr14 | 1.05E+08 | 1.05E+08 | C      | T        | UTR5           | AKT1                               | NA                | NA                                                                                    | NA                              | rs10138227  | NA |
| chr14 | 1.05E+08 | 1.05E+08 | A      | G        | UTR3           | ZBTB42                             | NA                | NA                                                                                    | NA                              | rs140954212 | NA |
| chr14 | 1.05E+08 | 1.05E+08 | C      | T        | ncRNA_exonic   | LINC00638                          | NA                | NA                                                                                    | NA                              | rs12894160  | NA |
| chr14 | 1.05E+08 | 1.05E+08 | C      | G        | exonic         | AHNAK2                             | nonsynonymous SNV | AHNAK2:NM_138420:exon7:c.G9625C;p.V3209L                                              | NA                              | rs201181175 | NA |
| chr14 | 1.05E+08 | 1.05E+08 | T      | C        | exonic         | AHNAK2                             | nonsynonymous SNV | AHNAK2:NM_138420:exon7:c.A6509G;p.K2170R                                              | NA                              | rs201127689 | NA |
| chr14 | 1.05E+08 | 1.05E+08 | G      | C        | exonic         | AHNAK2                             | synonymous SNV    | AHNAK2:NM_138420:exon7:c.C6507G;p.G2169G                                              | NA                              | rs146449084 | NA |
| chr14 | 1.05E+08 | 1.05E+08 | T      | C        | exonic         | AHNAK2                             | synonymous SNV    | AHNAK2:NM_138420:exon7:c.A6291G;p.K2097K                                              | NA                              | rs201263008 | NA |
| chr14 | 1.05E+08 | 1.05E+08 | G      | C        | exonic         | AHNAK2                             | nonsynonymous SNV | AHNAK2:NM_138420:exon7:c.C6133G;p.L2045V                                              | NA                              | rs11850885  | NA |
| chr14 | 1.06E+08 | 1.06E+08 | T      | G        | exonic         | JAG2                               | nonsynonymous SNV | _145159:exon22:c.A2755C;p.T919P,JAG2:NM_002226:exon23:c.A2869G                        | NA                              | NA          | D  |
| chr14 | 1.06E+08 | 1.06E+08 | C      | A        | UTR3           | BRF1                               | NA                | NA                                                                                    | NA                              | rs8270      | NA |
| chr14 | 1.07E+08 | 1.07E+08 | G      | C        | ncRNA_exonic   | LINC00221                          | NA                | NA                                                                                    | NA                              | rs10873578  | NA |
| chr14 | 1.07E+08 | 1.07E+08 | C      | G        | ncRNA_exonic   | LINC00221                          | NA                | NA                                                                                    | ID=COSN393151;OCCURENCE=1(lung) | rs11160980  | NA |



|       |          |          |      |           |              |           |                      |                                                               |    |             |    |
|-------|----------|----------|------|-----------|--------------|-----------|----------------------|---------------------------------------------------------------|----|-------------|----|
| chr14 | 1.07E+08 | 1.07E+08 | T    | G         | ncRNA_exonic | LINC00221 | NA                   | NA                                                            | NA | rs11160981  | NA |
| chr14 | 1.07E+08 | 1.07E+08 | A    | -         | ncRNA_exonic | LINC00221 | NA                   | NA                                                            | NA | rs140975989 | NA |
| chr15 | 20740129 | 20740129 | G    | A         | exonic       | GOLGA6L6  | nonsynonymous SNV    | GOLGA6L6:NM_001145004:exon8:c.C1621T:p.R541W                  | NA | rs199932545 | NA |
| chr15 | 21127120 | 21127120 | C    | T         | ncRNA_exonic | NF1P2     | NA                   | NA                                                            | NA | rs2672341   | NA |
| chr15 | 21134563 | 21134563 | A    | G         | ncRNA_exonic | NF1P2     | NA                   | NA                                                            | NA | rs145897182 | NA |
| chr15 | 21938564 | 21938564 | A    | G         | ncRNA_exonic | LOC646214 | NA                   | NA                                                            | NA | rs4383099   | NA |
| chr15 | 21939417 | 21939417 | T    | C         | ncRNA_exonic | LOC646214 | NA                   | NA                                                            | NA | rs28478588  | NA |
| chr15 | 21940430 | 21940430 | -    | TTGTTTATC | ncRNA_exonic | LOC646214 | NA                   | NA                                                            | NA | rs6145499   | NA |
| chr15 | 22703218 | 22703218 | A    | G         | ncRNA_exonic | GOLGA8DP  | NA                   | NA                                                            | NA | rs1822555   | NA |
| chr15 | 22743252 | 22743252 | T    | C         | exonic       | GOLGA6L1  | nonsynonymous SNV    | GOLGA6L1:NM_001001413:exon8:c.T1637C:p.M546T                  | NA | NA          | NA |
| chr15 | 23005380 | 23005380 | -    | C         | UTR3         | NIPA2     | NA                   | NA                                                            | NA | rs35420735  | NA |
| chr15 | 23441131 | 23441131 | C    | A         | ncRNA_exonic | GOLGA8EP  | NA                   | NA                                                            | NA | rs112118972 | B  |
| chr15 | 23446011 | 23446011 | C    | T         | ncRNA_exonic | GOLGA8EP  | NA                   | NA                                                            | NA | rs2120419   | NA |
| chr15 | 24414994 | 24414994 | T    | C         | ncRNA_exonic | PWRN2     | NA                   | NA                                                            | NA | rs4029933   | NA |
| chr15 | 24415020 | 24415020 | T    | C         | ncRNA_exonic | PWRN2     | NA                   | NA                                                            | NA | rs3950711   | NA |
| chr15 | 24813154 | 24813154 | T    | C         | ncRNA_exonic | PWRN1     | NA                   | NA                                                            | NA | rs28574764  | NA |
| chr15 | 28096538 | 28096538 | A    | G         | exonic       | OCA2      | synonymous SNV       | OCA2:NM_000275:exon22:c.T2328C:p.A776A                        | NA | rs1800419   | NA |
| chr15 | 28502279 | 28502279 | A    | G         | exonic       | HERC2     | synonymous SNV       | HERC2:NM_004667:exon17:c.T2445C:p.G815G                       | NA | rs11631797  | NA |
| chr15 | 28566548 | 28566548 | T    | C         | exonic       | HERC2     | nonsynonymous SNV    | HERC2:NM_004667:exon2:c.A32G:p.Q11R                           | NA | rs201990459 | P  |
| chr15 | 29002606 | 29002606 | C    | T         | ncRNA_exonic | WHAMMP2   | NA                   | NA                                                            | NA | rs200451851 | NA |
| chr15 | 29992941 | 29992941 | G    | A         | UTR3         | TJP1      | NA                   | NA                                                            | NA | NA          | NA |
| chr15 | 30664453 | 30664453 | C    | T         | exonic       | CHRFAM7A  | synonymous SNV       | M_148911:exon6:c.G147A:p.T49T,CHRFAM7A:NM_139320:exon7:c.G    | NA | rs1042722   | NA |
| chr15 | 31669511 | 31669511 | -    | AG        | UTR3         | KLF13     | NA                   | NA                                                            | NA | rs138437319 | NA |
| chr15 | 33261185 | 33261185 | G    | A         | exonic       | FMN1      | nonsynonymous SNV    | 01103184:exon4:c.C2048T:p.P683L,FMN1:NM_001277313:exon8:c.C2  | NA | rs117804335 | NA |
| chr15 | 34523794 | 34523794 | T    | -         | UTR3         | SLC12A6   | NA                   | NA                                                            | NA | NA          | NA |
| chr15 | 34525152 | 34525152 | T    | A         | UTR3         | SLC12A6   | NA                   | NA                                                            | NA | NA          | NA |
| chr15 | 34525170 | 34525170 | T    | G         | UTR3         | SLC12A6   | NA                   | NA                                                            | NA | NA          | NA |
| chr15 | 37102239 | 37102239 | -    | AC        | ncRNA_UTR3   | C15orf41  | NA                   | NA                                                            | NA | NA          | NA |
| chr15 | 39889456 | 39889456 | G    | T         | UTR3         | THBS1     | NA                   | NA                                                            | NA | NA          | NA |
| chr15 | 39889476 | 39889476 | G    | T         | UTR3         | THBS1     | NA                   | NA                                                            | NA | rs202242472 | NA |
| chr15 | 40711933 | 40711933 | G    | A         | UTR3         | IVD       | NA                   | NA                                                            | NA | rs4923865   | NA |
| chr15 | 41024303 | 41024303 | T    | C         | UTR3         | RAD51     | NA                   | NA                                                            | NA | rs11855560  | NA |
| chr15 | 41099899 | 41099899 | -    | GGGGC     | exonic       | ZFYVE19   | frameshift insertion | con1:c.112_113insGGGGC:p.W38fs,ZFYVE19:NM_001258420:exon1:c.  | NA | rs142730574 | NA |
| chr15 | 41192602 | 41192602 | G    | C         | exonic       | VPS18     | nonsynonymous SNV    | VPS18:NM_020857:exon4:c.G1586C:p.S529T                        | NA | NA          | B  |
| chr15 | 41231084 | 41231084 | A    | C         | UTR3         | DLL4      | NA                   | NA                                                            | NA | NA          | NA |
| chr15 | 41590298 | 41590298 | -    | T         | ncRNA_exonic | OIP5-AS1  | NA                   | NA                                                            | NA | rs34536592  | NA |
| chr15 | 41591315 | 41591318 | TTTA | -         | ncRNA_exonic | OIP5-AS1  | NA                   | NA                                                            | NA | rs139720436 | NA |
| chr15 | 41773443 | 41773444 | GG   | -         | UTR3         | RTF1      | NA                   | NA                                                            | NA | rs10593971  | NA |
| chr15 | 42159290 | 42159290 | C    | T         | exonic       | SPTBN5    | nonsynonymous SNV    | SPTBN5:NM_016642:exon36:c.G6347A:p.R2116Q                     | NA | rs2290553   | NA |
| chr15 | 42707911 | 42707911 | -    | T         | UTR3         | ZNF106    | NA                   | NA                                                            | NA | rs145603791 | NA |
| chr15 | 42707938 | 42707941 | TTTT | -         | UTR3         | ZNF106    | NA                   | NA                                                            | NA | NA          | NA |
| chr15 | 42834962 | 42834962 | C    | T         | UTR3         | LRRC57    | NA                   | NA                                                            | NA | rs75705010  | NA |
| chr15 | 42861496 | 42861496 | T    | -         | UTR3         | HAUS2     | NA                   | NA                                                            | NA | NA          | NA |
| chr15 | 43652542 | 43652542 | -    | A         | UTR3         | ZSCAN29   | NA                   | NA                                                            | NA | rs35479272  | NA |
| chr15 | 43707808 | 43707808 | A    | T         | exonic       | TP53BP1   | synonymous SNV       | :p.S1691S,TP53BP1:NM_001141980:exon23:c.T5073A:p.S1691S,TP53B | NA | rs2230451   | NA |
| chr15 | 45694579 | 45694579 | C    | T         | UTR5         | SPATA5L1  | NA                   | NA                                                            | NA | rs1820518   | NA |
| chr15 | 45694610 | 45694610 | C    | T         | UTR5         | SPATA5L1  | NA                   | NA                                                            | NA | rs1365610   | NA |
| chr15 | 45848231 | 45848231 | T    | -         | ncRNA_exonic | HMG20A    | NA                   | NA                                                            | NA | NA          | NA |
| chr15 | 50888568 | 50888568 | A    | G         | exonic       | TRPM7     | synonymous SNV       | TRPM7:NM_017672:exon23:c.T3174C:p.N1058N                      | NA | rs543821    | NA |
| chr15 | 51697575 | 51697575 | T    | -         | UTR3         | GLDN      | NA                   | NA                                                            | NA | rs5812554   | NA |
| chr15 | 51914662 | 51914662 | G    | A         | exonic       | DMXL2     | synonymous SNV       | :c.C81T:p.P27P,DMXL2:NM_001174117:exon1:c.C81T:p.P27P,DMXL2:N | NA | rs2278990   | NA |
| chr15 | 51914716 | 51914716 | T    | C         | exonic       | DMXL2     | synonymous SNV       | :c.A27G:p.G9G,DMXL2:NM_001174117:exon1:c.A27G:p.G9G,DMXL2:N   | NA | rs2278989   | NA |
| chr15 | 51988178 | 51988178 | T    | A         | exonic       | SCG3      | synonymous SNV       | I_001165257:exon7:c.T279A:p.V93V,SCG3:NM_013243:exon8:c.T975A | NA | NA          | NA |
| chr15 | 52485512 | 52485514 | AAA  | -         | UTR3         | MYO5C     | NA                   | NA                                                            | NA | rs143753379 | NA |
| chr15 | 53807252 | 53807252 | -    | TA        | UTR3         | WDR72     | NA                   | NA                                                            | NA | rs141109063 | NA |
| chr15 | 55495963 | 55495963 | T    | C         | UTR3         | RAB27A    | NA                   | NA                                                            | NA | rs1061824   | NA |
| chr15 | 55496043 | 55496043 | T    | A         | UTR3         | RAB27A    | NA                   | NA                                                            | NA | rs1061823   | NA |
| chr15 | 55496058 | 55496058 | A    | C         | UTR3         | RAB27A    | NA                   | NA                                                            | NA | rs1061822   | NA |
| chr15 | 56032872 | 56032872 | G    | A         | exonic       | PRTG      | synonymous SNV       | PRTG:NM_173814:exon2:c.C105T:p.C35C                           | NA | rs77118243  | NA |
| chr15 | 56757188 | 56757188 | A    | C         | UTR5         | MNS1      | NA                   | NA                                                            | NA | NA          | NA |
| chr15 | 58476533 | 58476533 | A    | C         | UTR3         | AQP9      | NA                   | NA                                                            | NA | NA          | NA |
| chr15 | 59149732 | 59149732 | C    | A         | UTR3         | FAM63B    | NA                   | NA                                                            | NA | NA          | NA |
| chr15 | 60714879 | 60714879 | -    | A         | UTR3         | NARG2     | NA                   | NA                                                            | NA | NA          | NA |
| chr15 | 62146078 | 62146078 | A    | -         | UTR3         | VPS13C    | NA                   | NA                                                            | NA | rs5813123   | NA |
| chr15 | 62146252 | 62146252 | -    | C         | UTR3         | VPS13C    | NA                   | NA                                                            | NA | NA          | NA |
| chr15 | 63362505 | 63362505 | A    | G         | UTR3         | TPM1      | NA                   | NA                                                            | NA | rs77963487  | NA |

|       |          |          |          |      |                |                             |                   |                                                                        |           |             |    |
|-------|----------|----------|----------|------|----------------|-----------------------------|-------------------|------------------------------------------------------------------------|-----------|-------------|----|
| chr15 | 63950887 | 63950887 | G        | A    | exonic         | HERC1                       | nonsynonymous SNV | HERC1:NM_003922:exon48:c.C9455T;p.S3152F                               | NA        | rs2228513   | NA |
| chr15 | 64433178 | 64433178 | -        | ATAT | UTR3           | SNX1                        | NA                | NA                                                                     | NA        | rs10678400  | NA |
| chr15 | 64433233 | 64433236 | ATAG     | -    | UTR3           | SNX1                        | NA                | NA                                                                     | NA        | rs150403479 | NA |
| chr15 | 64447710 | 64447717 | AAAAAAAA | -    | UTR3           | SNX22                       | NA                | NA                                                                     | NA        | rs200256434 | NA |
| chr15 | 64458282 | 64458282 | A        | -    | UTR3           | CSNK1G1                     | NA                | NA                                                                     | NA        | rs143314613 | NA |
| chr15 | 65674738 | 65674738 | A        | C    | UTR3           | IGDCC4                      | NA                | NA                                                                     | NA        | rs79447611  | NA |
| chr15 | 65684533 | 65684533 | A        | G    | exonic         | IGDCC4                      | synonymous SNV    | IGDCC4:NM_020962:exon11:c.T2061C;p.A687A                               | NA        | rs2277582   | NA |
| chr15 | 65738042 | 65738042 | -        | A    | UTR3           | DPP8                        | NA                | NA                                                                     | NA        | NA          | NA |
| chr15 | 65738954 | 65738954 | -        | T    | UTR3           | DPP8                        | NA                | NA                                                                     | NA        | NA          | NA |
| chr15 | 66626067 | 66626075 | AAAAAAAA | -    | UTR3           | DIS3L                       | NA                | NA                                                                     | NA        | NA          | NA |
| chr15 | 67493516 | 67493516 | T        | -    | UTR3           | AAGAB                       | NA                | NA                                                                     | NA        | NA          | NA |
| chr15 | 68124665 | 68124665 | C        | A    | exonic         | SKOR1                       | synonymous SNV    | SKOR1:NM_001258024:exon12:c.C2350A;p.R784R                             | NA        | rs72751453  | NA |
| chr15 | 69113060 | 69113060 | G        | T    | exonic         | ANP32A                      | nonsynonymous SNV | ANP32A:NM_006305:exon1:c.C31A;p.L11M                                   | NA        | NA          | NA |
| chr15 | 69113063 | 69113063 | C        | T    | exonic         | ANP32A                      | nonsynonymous SNV | ANP32A:NM_006305:exon1:c.G28A;p.E10K                                   | NA        | NA          | NA |
| chr15 | 69113065 | 69113065 | A        | G    | exonic         | ANP32A                      | nonsynonymous SNV | ANP32A:NM_006305:exon1:c.T26C;p.L9S                                    | NA        | NA          | NA |
| chr15 | 69113067 | 69113067 | A        | T    | exonic         | ANP32A                      | nonsynonymous SNV | ANP32A:NM_006305:exon1:c.T24A;p.H8Q                                    | NA        | NA          | NA |
| chr15 | 69699209 | 69699209 | A        | -    | UTR3           | PAQR5                       | NA                | NA                                                                     | NA        | NA          | NA |
| chr15 | 71276491 | 71276491 | G        | A    | exonic         | LRRRC49                     | nonsynonymous SNV | IA:p.R360Q,LRRRC49:NM_017691:exon11:c.G1064A;p.R355Q,LRRRC49:N         | NA        | NA          | B  |
| chr15 | 72452675 | 72452676 | AA       | -    | UTR3           | GRAMD2                      | NA                | NA                                                                     | NA        | NA          | NA |
| chr15 | 73614703 | 73614704 | GT       | -    | UTR3           | HCN4                        | NA                | NA                                                                     | NA        | rs35177144  | NA |
| chr15 | 74419238 | 74419241 | TGTG     | -    | ncRNA_exonic   | LOC283731                   | NA                | NA                                                                     | NA        | NA          | NA |
| chr15 | 75047699 | 75047699 | A        | C    | UTR3           | CYP1A2                      | NA                | NA                                                                     | NA        | rs58661304  | NA |
| chr15 | 75095027 | 75095027 | T        | G    | UTR3           | CSK                         | NA                | NA                                                                     | NA        | NA          | NA |
| chr15 | 75581791 | 75581791 | G        | A    | exonic         | GOLGA6D                     | synonymous SNV    | GOLGA6D:NM_001145224:exon8:c.G618A;p.K206K                             | NA        | NA          | NA |
| chr15 | 76029269 | 76029269 | G        | A    | ncRNA_intronic | DNM1P35                     | NA                | NA                                                                     | NA        | rs199786499 | NA |
| chr15 | 76552478 | 76552478 | T        | A    | ncRNA_exonic   | TYRO3P                      | NA                | NA                                                                     | NA        | NA          | NA |
| chr15 | 76552480 | 76552480 | T        | C    | ncRNA_exonic   | TYRO3P                      | NA                | NA                                                                     | NA        | NA          | NA |
| chr15 | 76552485 | 76552485 | A        | G    | ncRNA_exonic   | TYRO3P                      | NA                | NA                                                                     | NA        | NA          | NA |
| chr15 | 77228049 | 77228049 | G        | A    | exonic         | RCN2                        | nonsynonymous SNV | _001271837:exon3:c.G433A;p.E145K,RCN2:NM_002902:exon3:c.G433           | NA        | NA          | B  |
| chr15 | 77228050 | 77228050 | A        | G    | exonic         | RCN2                        | nonsynonymous SNV | _001271837:exon3:c.A434G;p.E145G,RCN2:NM_002902:exon3:c.A434           | NA        | NA          | B  |
| chr15 | 77905661 | 77905661 | A        | G    | UTR3           | LINGO1                      | NA                | NA                                                                     | NA        | rs1058129   | NA |
| chr15 | 78792881 | 78792883 | AAA      | -    | UTR3           | IREB2                       | NA                | NA                                                                     | NA        | NA          | NA |
| chr15 | 79054900 | 79054900 | C        | G    | exonic         | ADAMTS7                     | nonsynonymous SNV | ADAMTS7:NM_014272:exon23:c.G4748C;p.G1583A                             | NA        | rs7495616   | B  |
| chr15 | 79237247 | 79237247 | C        | G    | exonic         | CTSH                        | nonsynonymous SNV | CTSH:NM_004390:exon1:c.G77C;p.C26S                                     | NA        | rs1036938   | B  |
| chr15 | 79237324 | 79237324 | C        | A    | UTR5           | CTSH                        | NA                | NA                                                                     | NA        | rs1036939   | NA |
| chr15 | 79575294 | 79575294 | C        | T    | ncRNA_UTR5     | ANKRD34C                    | NA                | NA                                                                     | NA        | rs35531114  | NA |
| chr15 | 79575486 | 79575486 | G        | A    | ncRNA_UTR5     | ANKRD34C                    | NA                | NA                                                                     | NA        | rs62025009  | NA |
| chr15 | 83013936 | 83013936 | T        | C    | intergenic     | :97(dist=27509),UBE2Q2P3(di | NA                | NA                                                                     | NA        | rs202104598 | NA |
| chr15 | 83659296 | 83659296 | T        | -    | UTR3           | FAM103A1                    | NA                | NA                                                                     | NA        | NA          | NA |
| chr15 | 85053254 | 85053254 | T        | C    | ncRNA_exonic   | GOLGA6L5                    | NA                | NA                                                                     | NA        | NA          | NA |
| chr15 | 85055683 | 85055683 | C        | T    | ncRNA_exonic   | GOLGA6L5                    | NA                | NA                                                                     | NA        | rs199636264 | NA |
| chr15 | 85185577 | 85185583 | AAAAAAA  | -    | ncRNA_exonic   | SCAND2P                     | NA                | NA                                                                     | NA        | rs201991585 | NA |
| chr15 | 89398997 | 89398997 | A        | T    | exonic         | ACAN                        | nonsynonymous SNV | 001135:exon12:c.A3181T;p.T1061S,ACAN:NM_013227:exon12:c.A318           | NA        | NA          | NA |
| chr15 | 89399054 | 89399054 | A        | T    | exonic         | ACAN                        | nonsynonymous SNV | 001135:exon12:c.A3238T;p.T1080S,ACAN:NM_013227:exon12:c.A323           | NA        | NA          | NA |
| chr15 | 89399453 | 89399453 | G        | T    | exonic         | ACAN                        | nonsynonymous SNV | 001135:exon12:c.G3637T;p.A1213S,ACAN:NM_013227:exon12:c.G363           | NA        | NA          | NA |
| chr15 | 89400097 | 89400097 | T        | G    | exonic         | ACAN                        | nonsynonymous SNV | 001135:exon12:c.T4281G;p.D1427E,ACAN:NM_013227:exon12:c.T428           | NA        | NA          | NA |
| chr15 | 89400100 | 89400100 | G        | C    | exonic         | ACAN                        | nonsynonymous SNV | 001135:exon12:c.G4284C;p.E1428D,ACAN:NM_013227:exon12:c.G428           | NA        | NA          | NA |
| chr15 | 89400106 | 89400106 | T        | C    | exonic         | ACAN                        | synonymous SNV    | 001135:exon12:c.T4290C;p.S1430S,ACAN:NM_013227:exon12:c.T429           | NA        | rs78806382  | NA |
| chr15 | 89442606 | 89442606 | C        | T    | UTR3           | MFE2A                       | NA                | NA                                                                     | NA        | rs2280214   | NA |
| chr15 | 93008848 | 93008848 | A        | C    | UTR3           | ST8SIA2                     | NA                | NA                                                                     | NA        | NA          | NA |
| chr15 | 93114612 | 93114612 | G        | A    | ncRNA_exonic   | LOC100144604                | NA                | NA                                                                     | NA        | NA          | NA |
| chr15 | 93616283 | 93616283 | -        | AGG  | UTR5           | RGMA                        | NA                | NA                                                                     | NA        | rs112633977 | NA |
| chr15 | 98981199 | 98981199 | A        | T    | UTR3           | FAM169B                     | NA                | NA                                                                     | NA        | NA          | NA |
| chr15 | 98981248 | 98981248 | A        | G    | UTR3           | FAM169B                     | NA                | NA                                                                     | NA        | NA          | NA |
| chr15 | 1E+08    | 1E+08    | A        | C    | exonic         | MEF2A                       | nonsynonymous SNV | C:p.Q420P,MEF2A:NM_001130927:exon10:c.A1079C;p.Q360P,MEF2A:            | NA        | rs199811207 | NA |
| chr15 | 1E+08    | 1E+08    | T        | A    | ncRNA_exonic   | DNM1P46                     | NA                | NA                                                                     | NA        | rs200691929 | NA |
| chr15 | 1E+08    | 1E+08    | A        | G    | ncRNA_exonic   | DNM1P46                     | NA                | NA                                                                     | NA        | rs2458579   | NA |
| chr15 | 1.02E+08 | 1.02E+08 | G        | A    | ncRNA_exonic   | FAM138E                     | NA                | NA                                                                     | NA        | NA          | NA |
| chr15 | 1.03E+08 | 1.03E+08 | C        | G    | ncRNA_exonic   | WASH3P                      | NA                | NA                                                                     | NA        | rs7350147   | NA |
| chr15 | 1.03E+08 | 1.03E+08 | C        | T    | ncRNA_exonic   | WASH3P                      | NA                | NA                                                                     | NA        | rs1045862   | NA |
| chr16 | 332904   | 332912   | CCCTGCTC | -    | UTR3           | ARHGDI3                     | NA                | NA                                                                     | NA        | rs147027565 | NA |
| chr16 | 332992   | 332992   | T        | C    | UTR3           | ARHGDI3                     | NA                | NA                                                                     | NA        | rs443338    | NA |
| chr16 | 442014   | 442014   | G        | A    | ncRNA_exonic   | LOC100134368                | NA                | NA                                                                     | NA        | rs57899228  | NA |
| chr16 | 678121   | 678121   | A        | C    | UTR3           | RAB40C                      | NA                | NA                                                                     | NA        | NA          | NA |
| chr16 | 678133   | 678133   | A        | G    | UTR3           | RAB40C                      | NA                | NA                                                                     | NA        | NA          | NA |
| chr16 | 781633   | 781633   | G        | A    | exonic         | NARFL                       | synonymous SNV    | NARFL:NM_022493:exon9:c.C966T;p.H322H =COSM1178439;OCCURENCE=1(prostat | rs3829492 | NA          | NA |

|       |          |          |           |       |              |              |                        |                                                                       |           |                             |    |
|-------|----------|----------|-----------|-------|--------------|--------------|------------------------|-----------------------------------------------------------------------|-----------|-----------------------------|----|
| chr16 | 1036768  | 1036768  | G         | A     | UTR3         | SOX8         | NA                     | NA                                                                    | NA        | NA                          | NA |
| chr16 | 1036795  | 1036795  | A         | T     | UTR3         | SOX8         | NA                     | NA                                                                    | NA        | NA                          | NA |
| chr16 | 1115843  | 1115846  | GGCA      | -     | ncRNA_exonic | SSTR5-AS1    | NA                     | NA                                                                    | NA        | rs143173222                 | NA |
| chr16 | 1116220  | 1116220  | -         | G     | ncRNA_exonic | SSTR5-AS1    | NA                     | NA                                                                    | NA        | rs113450650                 | NA |
| chr16 | 1139446  | 1139446  | G         | T     | UTR3         | C1QTNF8      | NA                     | NA                                                                    | NA        | rs183188                    | NA |
| chr16 | 1290700  | 1290700  | A         | G     | UTR5         | TPSAB1       | NA                     | NA                                                                    | NA        | rs202022651                 | NA |
| chr16 | 1291454  | 1291454  | G         | A     | exonic       | TPSAB1       | nonsynonymous SNV      | TPSAB1:NM_003294:exon4:c.G253A:p.A85T                                 | NA        | rs1141968                   | B  |
| chr16 | 1292425  | 1292425  | T         | C     | UTR3         | TPSAB1       | NA                     | NA                                                                    | NA        | rs67723611                  | NA |
| chr16 | 1448690  | 1448690  | A         | C     | UTR3         | UNKL         | NA                     | NA                                                                    | NA        | NA                          | NA |
| chr16 | 1608082  | 1608082  | A         | G     | exonic       | IFT140       | synonymous SNV         | IFT140:NM_014714:exon19:c.T2253C:p.P751P                              | rs2076436 | rs148006;OCCURENCE=1(stomac | NA |
| chr16 | 1843672  | 1843672  | T         | C     | UTR5         | IGFALS       | NA                     | NA                                                                    | NA        | rs3817902                   | NA |
| chr16 | 1912021  | 1912021  | T         | G     | exonic       | MEIOB        | nonsynonymous SNV      | MEIOB:NM_001163560:exon4:c.A224C:p.K75T,MEIOB:NM_152764:exon4:c.A22   | NA        | rs1657125                   | NA |
| chr16 | 1962132  | 1962132  | G         | A     | exonic       | HS3ST6       | nonsynonymous SNV      | HS3ST6:NM_001009606:exon2:c.C395T:p.A132V                             | NA        | rs8055325                   | NA |
| chr16 | 2004119  | 2004119  | C         | T     | exonic       | RPL3L        | nonsynonymous SNV      | RPL3L:NM_005061:exon2:c.G34A:p.G12R                                   | NA        | rs146294352                 | P  |
| chr16 | 2031405  | 2031405  | T         | C     | UTR5         | NOXO1        | NA                     | NA                                                                    | NA        | rs56268858                  | NA |
| chr16 | 2088407  | 2088417  | CCCTTCCCC | -     | UTR3         | SLC9A3R2     | NA                     | NA                                                                    | NA        | NA                          | NA |
| chr16 | 2391186  | 2391186  | C         | G     | ncRNA_exonic | ABCA17P      | NA                     | NA                                                                    | NA        | NA                          | NA |
| chr16 | 2508255  | 2508255  | T         | -     | UTR3         | CCNF         | NA                     | NA                                                                    | NA        | NA                          | NA |
| chr16 | 2821114  | 2821114  | T         | C     | UTR3         | SRRM2        | NA                     | NA                                                                    | NA        | NA                          | NA |
| chr16 | 2902840  | 2902840  | -         | G     | UTR3         | PRSS22       | NA                     | NA                                                                    | NA        | rs145631527                 | NA |
| chr16 | 3078416  | 3078416  | -         | G     | exonic       | CCDC64B      | frameshift insertion   | CCDC64B:NM_001103175:exon8:c.1292_1293insC:p.L431fs                   | NA        | NA                          | NA |
| chr16 | 3304654  | 3304654  | T         | C     | exonic       | MEFV         | synonymous SNV         | MEFV:NM_000243:exon2:c.A414G:p.G138G                                  | NA        | rs224224                    | NA |
| chr16 | 3726074  | 3726074  | G         | C     | exonic       | TRAP1        | synonymous SNV         | TRAP1:NM_001272049:exon6:c.C618G:p.S206S,TRAP1:NM_016292:exon7:c.C77  | NA        | rs61753377                  | NA |
| chr16 | 3726075  | 3726075  | G         | A     | exonic       | TRAP1        | nonsynonymous SNV      | TRAP1:NM_001272049:exon6:c.C617T:p.S206F,TRAP1:NM_016292:exon7:c.C77  | NA        | rs61753378                  | B  |
| chr16 | 4626026  | 4626026  | G         | A     | exonic       | C16orf96     | synonymous SNV         | C16orf96:NM_001145011:exon5:c.G1545A:p.K515K                          | NA        | NA                          | NA |
| chr16 | 4626031  | 4626031  | T         | G     | exonic       | C16orf96     | nonsynonymous SNV      | C16orf96:NM_001145011:exon5:c.T1550G:p.V517G                          | NA        | NA                          | NA |
| chr16 | 4751045  | 4751045  | C         | T     | exonic       | ANKS3        | nonsynonymous SNV      | ANKS3:NM_001242929:exon8:c.G889A:p.A297T,ANKS3:NM_133450:exon11:c.G12 | rs863980  | rs148013;OCCURENCE=1(stomac | B  |
| chr16 | 4752134  | 4752134  | A         | G     | exonic       | ANKS3        | synonymous SNV         | ANKS3:NM_001242929:exon6:c.T657C:p.D219D,ANKS3:NM_133450:exon9:c.T97  | NA        | rs841210                    | NA |
| chr16 | 4777071  | 4777071  | A         | C     | exonic       | ANKS3        | nonsynonymous SNV      | ANKS3:NM_133450:exon4:c.T278G:p.V93G                                  | NA        | NA                          | D  |
| chr16 | 5067196  | 5067196  | A         | G     | UTR3         | SEC14L5      | NA                     | NA                                                                    | NA        | NA                          | NA |
| chr16 | 5067198  | 5067198  | T         | G     | UTR3         | SEC14L5      | NA                     | NA                                                                    | NA        | NA                          | NA |
| chr16 | 5068586  | 5068586  | T         | C     | UTR3         | SEC14L5      | NA                     | NA                                                                    | NA        | rs2270257                   | NA |
| chr16 | 7761230  | 7761231  | AA        | -     | UTR3         | RBFOX1       | NA                     | NA                                                                    | NA        | NA                          | NA |
| chr16 | 8889470  | 8889470  | T         | C     | UTR3         | TMEM186      | NA                     | NA                                                                    | NA        | NA                          | NA |
| chr16 | 9211118  | 9211118  | T         | -     | UTR3         | C16orf72     | NA                     | NA                                                                    | NA        | rs34120073                  | NA |
| chr16 | 9916204  | 9916204  | C         | G     | exonic       | GRIN2A       | synonymous SNV         | GRIN2A:NM_001134408:exon10:c.G2085C:p.R695R,GRIN2                     | NA        | rs9806806                   | NA |
| chr16 | 10524657 | 10524659 | GAC       | -     | exonic       | ATF7IP2      | nonframeshift deletion | ATF7IP2:NM_001256160:exon4:c.18                                       | NA        | rs56252625                  | NA |
| chr16 | 10565979 | 10565981 | TGT       | -     | exonic       | ATF7IP2      | nonframeshift deletion | ATF7IP2:NM_001256160:exon9:c.13                                       | NA        | NA                          | NA |
| chr16 | 10625175 | 10625175 | G         | A     | UTR3         | EMP2         | NA                     | NA                                                                    | NA        | rs10459782                  | NA |
| chr16 | 10625606 | 10625613 | ATGAATGA  | -     | UTR3         | EMP2         | NA                     | NA                                                                    | NA        | rs149380057                 | NA |
| chr16 | 10626608 | 10626608 | C         | T     | UTR3         | EMP2         | NA                     | NA                                                                    | NA        | rs12930183                  | NA |
| chr16 | 10626615 | 10626615 | C         | T     | UTR3         | EMP2         | NA                     | NA                                                                    | NA        | rs12930185                  | NA |
| chr16 | 12897610 | 12897610 | A         | C     | exonic       | CPPED1       | synonymous SNV         | CPPED1:NM_001099455:exon1:c.T24G:p.G8G,CPPED1:NM_018340:exon1:c.T2    | NA        | NA                          | NA |
| chr16 | 13333322 | 13333322 | T         | A     | UTR3         | SHISA9       | NA                     | NA                                                                    | NA        | rs202142648                 | NA |
| chr16 | 14529754 | 14529755 | CA        | -     | UTR3         | PARN         | NA                     | NA                                                                    | NA        | NA                          | NA |
| chr16 | 15166891 | 15166891 | T         | C     | exonic       | RRN3         | nonsynonymous SNV      | RRN3:NM_018427:exon12:c.A1044G:p.I348M                                | NA        | rs2941256                   | B  |
| chr16 | 16367678 | 16367678 | T         | C     | exonic       | NOMO3        | synonymous SNV         | NOMO3:NM_001004067:exon19:c.T2187C:p.G729G                            | NA        | rs11554237                  | NA |
| chr16 | 18839362 | 18839362 | T         | C     | exonic       | SMG1         | synonymous SNV         | SMG1:NM_015092:exon55:c.A9732G:p.A3244A                               | NA        | rs12445870                  | NA |
| chr16 | 19278429 | 19278429 | -         | A     | UTR3         | SYT17        | NA                     | NA                                                                    | NA        | rs11379176                  | NA |
| chr16 | 19563849 | 19563850 | AA        | -     | UTR3         | CCP110       | NA                     | NA                                                                    | NA        | rs148157558                 | NA |
| chr16 | 20746239 | 20746239 | G         | C     | UTR3         | THUMPD1      | NA                     | NA                                                                    | NA        | rs67088894                  | NA |
| chr16 | 20748331 | 20748331 | C         | A     | exonic       | THUMPD1      | nonsynonymous SNV      | THUMPD1:NM_017736:exon4:c.G933T:p.E311D                               | NA        | rs11074471                  | NA |
| chr16 | 21078693 | 21078693 | T         | G     | exonic       | DNAH3        | synonymous SNV         | DNAH3:NM_017539:exon24:c.A3429C:p.A1143A                              | NA        | rs861424                    | NA |
| chr16 | 21191548 | 21191548 | C         | T     | UTR3         | TMEM159      | NA                     | NA                                                                    | NA        | NA                          | NA |
| chr16 | 21329340 | 21329351 | CACACACA  | -     | ncRNA_exonic | CRYM-AS1     | NA                     | NA                                                                    | NA        | rs147884336                 | NA |
| chr16 | 21513228 | 21513228 | G         | A     | ncRNA_exonic | LOC100271836 | NA                     | NA                                                                    | NA        | rs62047609                  | NA |
| chr16 | 22299310 | 22299313 | TTTT      | -     | UTR3         | EEF2K        | NA                     | NA                                                                    | NA        | NA                          | NA |
| chr16 | 22546421 | 22546421 | A         | G     | exonic       | LOC100132247 | nonsynonymous SNV      | LOC100132247:NM_001135865:exon7:c.A2117G:p.Q706R                      | NA        | NA                          | NA |
| chr16 | 23598584 | 23598584 | C         | T     | exonic       | NDUFAB1      | synonymous SNV         | NDUFAB1:NM_005003:exon2:c.G225A:p.T75T                                | NA        | rs139679834                 | NA |
| chr16 | 24230566 | 24230566 | -         | TTTTG | UTR3         | PRKCB        | NA                     | NA                                                                    | NA        | NA                          | NA |
| chr16 | 24230976 | 24230976 | A         | -     | UTR3         | PRKCB        | NA                     | NA                                                                    | NA        | rs200055220                 | NA |
| chr16 | 24230979 | 24230983 | ACACA     | -     | UTR3         | PRKCB        | NA                     | NA                                                                    | NA        | NA                          | NA |
| chr16 | 24836091 | 24836091 | A         | -     | UTR3         | TNRC6A       | NA                     | NA                                                                    | NA        | NA                          | NA |
| chr16 | 25250586 | 25250587 | AA        | -     | UTR3         | ZKSCAN2      | NA                     | NA                                                                    | NA        | NA                          | NA |
| chr16 | 28332504 | 28332521 | CACACACA  | -     | UTR3         | SBK1         | NA                     | NA                                                                    | NA        | rs67770198                  | NA |
| chr16 | 28875215 | 28875223 | CCGCCGCC  | -     | UTR5         | SH2B1        | NA                     | NA                                                                    | NA        | rs138146565                 | NA |

|       |          |          |      |          |                     |               |                   |                                                                                                              |                                 |             |    |
|-------|----------|----------|------|----------|---------------------|---------------|-------------------|--------------------------------------------------------------------------------------------------------------|---------------------------------|-------------|----|
| chr16 | 28877938 | 28877938 | A    | G        | exonic              | SH2B1         | nonsynonymous SNV | :p.T175A,SH2B1:NM_001145796:exon2:c.A523G;p.T175A,SH2B1:NM_001145796:exon2:c.A523G                           | NA                              | rs181294111 | B  |
| chr16 | 28877949 | 28877949 | T    | C        | exonic              | SH2B1         | synonymous SNV    | :p.P178P,SH2B1:NM_001145796:exon2:c.T534C;p.P178P,SH2B1:NM_001145796:exon2:c.T534C                           | NA                              | NA          | NA |
| chr16 | 28877991 | 28877991 | A    | C        | exonic              | SH2B1         | synonymous SNV    | :p.P192P,SH2B1:NM_001145796:exon2:c.A576C;p.P192P,SH2B1:NM_001145796:exon2:c.A576C                           | NA                              | NA          | NA |
| chr16 | 29562570 | 29562570 | C    | A        | ncRNA_exonic        | LOC440354     | NA                | NA                                                                                                           | NA                              | rs200496369 | NA |
| chr16 | 29576811 | 29576811 | A    | G        | ncRNA_exonic        | LOC440354     | NA                | NA                                                                                                           | NA                              | rs201149124 | NA |
| chr16 | 29679738 | 29679741 | TGAA | -        | UTR3                | SPN           | NA                | NA                                                                                                           | NA                              | rs10537821  | NA |
| chr16 | 29681197 | 29681197 | -    | A        | UTR3                | SPN           | NA                | NA                                                                                                           | NA                              | rs112370778 | NA |
| chr16 | 29706379 | 29706379 | C    | T        | exonic              | QPRT          | synonymous SNV    | QPRT:NM_014298:exon2:c.C408T;p.G136G                                                                         | NA                              | rs113148463 | NA |
| chr16 | 29819087 | 29819087 | C    | G        | exonic              | MAZ           | synonymous SNV    | MAZ:NM_002383:exon2:c.C981G;p.R327R,MAZ:NM_002383:exon2:c.C981G                                              | NA                              | NA          | NA |
| chr16 | 29827029 | 29827029 | C    | G        | UTR3                | PRRT2         | NA                | NA                                                                                                           | NA                              | NA          | NA |
| chr16 | 30581031 | 30581031 | C    | A        | UTR3                | ZNF688        | NA                | NA                                                                                                           | NA                              | NA          | NA |
| chr16 | 30581051 | 30581051 | T    | G        | UTR3                | ZNF688        | NA                | NA                                                                                                           | NA                              | NA          | NA |
| chr16 | 30592781 | 30592781 | A    | -        | UTR3                | ZNF785        | NA                | NA                                                                                                           | NA                              | NA          | NA |
| chr16 | 30593451 | 30593451 | G    | T        | UTR3                | ZNF785        | NA                | NA                                                                                                           | NA                              | NA          | NA |
| chr16 | 31003963 | 31003963 | G    | -        | UTR3                | STX1B         | NA                | NA                                                                                                           | NA                              | rs67009097  | NA |
| chr16 | 31092888 | 31092888 | A    | G        | exonic              | ZNF646        | nonsynonymous SNV | ZNF646:NM_014699:exon2:c.A5243G;p.E1748G                                                                     | NA                              | NA          | P  |
| chr16 | 31092899 | 31092899 | C    | G        | exonic              | ZNF646        | nonsynonymous SNV | ZNF646:NM_014699:exon2:c.C5254G;p.R1752G                                                                     | NA                              | NA          | D  |
| chr16 | 31092933 | 31092933 | G    | C        | exonic              | ZNF646        | nonsynonymous SNV | ZNF646:NM_014699:exon2:c.G5288C;p.C1763S                                                                     | NA                              | NA          | D  |
| chr16 | 46602819 | 46602819 | C    | T        | ncRNA_exonic        | ANKRD26P1     | NA                | NA                                                                                                           | NA                              | rs12934443  | NA |
| chr16 | 46693621 | 46693621 | -    | A        | UTR3                | VPS35         | NA                | NA                                                                                                           | NA                              | rs34926621  | NA |
| chr16 | 46694101 | 46694101 | G    | T        | UTR3                | VPS35         | NA                | NA                                                                                                           | NA                              | rs199765664 | NA |
| chr16 | 46694103 | 46694103 | G    | T        | UTR3                | VPS35         | NA                | NA                                                                                                           | NA                              | rs808078    | NA |
| chr16 | 46773999 | 46773999 | C    | A        | exonic              | MYLK3         | nonsynonymous SNV | MYLK3:NM_182493:exon2:c.G538T;p.V180L                                                                        | 4148070,COSM148071;OCCURENCE=1( | rs28407821  | D  |
| chr16 | 46836143 | 46836143 | T    | -        | UTR3                | C16orf87      | NA                | NA                                                                                                           | NA                              | NA          | NA |
| chr16 | 47732497 | 47732497 | C    | A        | exonic              | PHKB          | nonsynonymous SNV | PHKB:NM_001031835:exon31:c.C31293:exon30:c.C3142A;p.Q1048K,PHKB:NM_001031835:exon31:c.C31293:exon30:c.C3142A | NA                              | NA          | P  |
| chr16 | 48258198 | 48258198 | C    | T        | exonic              | ABCC11        | nonsynonymous SNV | ABCC11:NM_032583:exon5:c.G538A;p.G180R,ABCC11:NM_032583:exon5:c.G538A                                        | NA                              | rs17822931  | D  |
| chr16 | 50264211 | 50264211 | -    | A        | UTR3                | PAPD5         | NA                | NA                                                                                                           | NA                              | rs34413257  | NA |
| chr16 | 53504029 | 53504029 | C    | T        | exonic              | RBL2          | nonsynonymous SNV | RBL2:NM_005611:exon15:c.C2177T;p.T726I                                                                       | NA                              | NA          | D  |
| chr16 | 55794514 | 55794514 | C    | T        | ncRNA_exonic        | CES1P1        | NA                | NA                                                                                                           | NA                              | rs7199449   | NA |
| chr16 | 55862691 | 55862691 | G    | A        | exonic              | CES1          | nonsynonymous SNV | CES1:NM_001025195:exon2:c.C248T;p.S83L,CES1:NM_001025195:exon2:c.C248T                                       | NA                              | rs62028647  | D  |
| chr16 | 55862717 | 55862717 | T    | C        | exonic              | CES1          | synonymous SNV    | CES1:NM_001025195:exon2:c.A222G;p.P74P,CES1:NM_001025195:exon2:c.A222G                                       | NA                              | rs76828834  | NA |
| chr16 | 55862720 | 55862720 | T    | C        | exonic              | CES1          | synonymous SNV    | CES1:NM_001025195:exon2:c.A219G;p.E73E,CES1:NM_001025195:exon2:c.A219G                                       | NA                              | rs74019278  | NA |
| chr16 | 55862762 | 55862762 | C    | G        | exonic              | CES1          | synonymous SNV    | CES1:NM_001025195:exon2:c.G177C;p.P59P,CES1:NM_001025195:exon2:c.G177C                                       | NA                              | rs35384853  | NA |
| chr16 | 56509445 | 56509445 | A    | T        | exonic              | OGFOD1        | nonsynonymous SNV | OGFOD1:NM_018233:exon12:c.A1435T;p.T479S                                                                     | NA                              | NA          | D  |
| chr16 | 56509452 | 56509452 | A    | T        | exonic              | OGFOD1        | nonsynonymous SNV | OGFOD1:NM_018233:exon12:c.A1442T;p.Y481F                                                                     | NA                              | NA          | D  |
| chr16 | 56510842 | 56510842 | G    | C        | UTR3                | OGFOD1        | NA                | NA                                                                                                           | NA                              | rs111625702 | NA |
| chr16 | 56691866 | 56691866 | T    | C        | UTR5                | MT1F          | NA                | NA                                                                                                           | NA                              | NA          | NA |
| chr16 | 56966071 | 56966071 | T    | G        | UTR5                | HERPUD1       | NA                | NA                                                                                                           | NA                              | rs37024     | NA |
| chr16 | 57398718 | 57398718 | -    | T        | UTR3                | CCL22         | NA                | NA                                                                                                           | NA                              | rs34460030  | NA |
| chr16 | 58054465 | 58054465 | -    | CTCT     | UTR3                | USB1          | NA                | NA                                                                                                           | NA                              | rs112874007 | NA |
| chr16 | 58315899 | 58315899 | A    | C        | UTR3                | CCDC113       | NA                | NA                                                                                                           | NA                              | NA          | NA |
| chr16 | 58546850 | 58546850 | C    | T        | UTR3                | NDRG4         | NA                | NA                                                                                                           | NA                              | NA          | NA |
| chr16 | 58553551 | 58553551 | A    | -        | UTR3                | SETD6         | NA                | NA                                                                                                           | NA                              | NA          | NA |
| chr16 | 67200249 | 67200249 | T    | G        | exonic              | HSF4          | nonsynonymous SNV | HSF4:NM_001040667:exon7:c.T512G;p.V171G,HSF4:NM_001040667:exon7:c.T512G                                      | NA                              | rs201403716 | D  |
| chr16 | 67200252 | 67200252 | T    | G        | exonic              | HSF4          | nonsynonymous SNV | HSF4:NM_001040667:exon7:c.T515G;p.V172G,HSF4:NM_001040667:exon7:c.T515G                                      | NA                              | NA          | D  |
| chr16 | 68599864 | 68599864 | -    | A        | UTR3                | ZFP90         | NA                | NA                                                                                                           | NA                              | NA          | NA |
| chr16 | 68849519 | 68849519 | C    | A        | exonic              | CDH1          | synonymous SNV    | CDH1:NM_004360:exon10:c.C1422A;p.T474T                                                                       | NA                              | NA          | NA |
| chr16 | 69341282 | 69341282 | T    | -        | UTR3                | SNTB2         | NA                | NA                                                                                                           | NA                              | rs71752949  | NA |
| chr16 | 69341695 | 69341695 | A    | -        | UTR3                | SNTB2         | NA                | NA                                                                                                           | NA                              | rs200699081 | NA |
| chr16 | 69385641 | 69385641 | A    | G        | exonic              | TMED6         | nonsynonymous SNV | TMED6:NM_144676:exon1:c.T16C;p.F6L                                                                           | NA                              | rs76116020  | B  |
| chr16 | 69599088 | 69599088 | -    | \AAAAAAA | upstream;downstream | NFAT5;MIR1538 | NA                | NA                                                                                                           | NA                              | NA          | NA |
| chr16 | 70164334 | 70164334 | A    | G        | exonic              | PDPR          | nonsynonymous SNV | PDPR:NM_017990:exon7:c.A616G;p.I206V                                                                         | NA                              | rs10852462  | NA |
| chr16 | 70182375 | 70182375 | T    | C        | exonic              | PDPR          | synonymous SNV    | PDPR:NM_017990:exon17:c.T1971C;p.S657S                                                                       | NA                              | rs11548413  | NA |
| chr16 | 70182390 | 70182390 | T    | G        | exonic              | PDPR          | nonsynonymous SNV | PDPR:NM_017990:exon17:c.T1986G;p.N662K                                                                       | NA                              | rs62050978  | NA |
| chr16 | 70506907 | 70506907 | T    | C        | exonic              | FUK           | synonymous SNV    | FUK:NM_145059:exon15:c.T1428C;p.P476P                                                                        | NA                              | rs7192865   | NA |
| chr16 | 70569215 | 70569215 | A    | T        | exonic              | SF3B3         | synonymous SNV    | SF3B3:NM_012426:exon6:c.A717T;p.P239P                                                                        | NA                              | rs33910368  | NA |
| chr16 | 70609852 | 70609852 | T    | C        | UTR3                | SF3B3         | NA                | NA                                                                                                           | NA                              | rs2168606   | NA |
| chr16 | 70609997 | 70609997 | A    | T        | UTR3                | SF3B3         | NA                | NA                                                                                                           | NA                              | rs79714557  | NA |
| chr16 | 70721428 | 70721429 | AC   | -        | UTR3                | VAC14         | NA                | NA                                                                                                           | NA                              | rs3833084   | NA |
| chr16 | 71981414 | 71981414 | -    | TTTG     | exonic              | PKD1L3        | unknown           | UNKNOWN                                                                                                      | NA                              | rs149635567 | NA |
| chr16 | 72820141 | 72820141 | T    | -        | UTR3                | ZFH3          | NA                | NA                                                                                                           | NA                              | NA          | NA |
| chr16 | 72820315 | 72820315 | T    | -        | UTR3                | ZFH3          | NA                | NA                                                                                                           | NA                              | rs199690302 | NA |
| chr16 | 72820938 | 72820938 | -    | T        | UTR3                | ZFH3          | NA                | NA                                                                                                           | NA                              | NA          | NA |
| chr16 | 74452071 | 74452071 | G    | A        | exonic              | CLEC18B       | synonymous SNV    | CLEC18B:NM_001011880:exon3:c.C342T;p.P114P                                                                   | NA                              | rs62056016  | NA |
| chr16 | 74655597 | 74655597 | -    | T        | UTR3                | RFWD3         | NA                | NA                                                                                                           | NA                              | NA          | NA |
| chr16 | 74907485 | 74907485 | T    | -        | UTR3                | WDR59         | NA                | NA                                                                                                           | NA                              | rs34150235  | NA |

|       |          |          |        |        |              |             |                        |                                                                                                         |                                  |             |    |
|-------|----------|----------|--------|--------|--------------|-------------|------------------------|---------------------------------------------------------------------------------------------------------|----------------------------------|-------------|----|
| chr16 | 74920191 | 74920191 | G      | A      | exonic       | WDR59       | synonymous SNV         | WDR59:NM_030581:exon24:c.C2523T:p.R841R                                                                 | NA                               | rs14308     | NA |
| chr16 | 75327916 | 75327916 | A      | G      | exonic       | CFDP1       | synonymous SNV         | CFDP1:NM_006324:exon7:c.T834C:p.L278L                                                                   | NA                               | rs6624      | NA |
| chr16 | 75565219 | 75565219 | A      | -      | UTR5         | CHST5       | NA                     | NA                                                                                                      | NA                               | NA          | NA |
| chr16 | 77228764 | 77228764 | C      | T      | exonic       | MON1B       | synonymous SNV         | MON1B:NM_014940:exon4:c.C1008T:p.F336F                                                                  | NA                               | NA          | NA |
| chr16 | 77316803 | 77316803 | C      | T      | UTR3         | ADAMTS18    | NA                     | NA                                                                                                      | NA                               | rs28385461  | NA |
| chr16 | 77316803 | 77316803 | -      | TCTT   | UTR3         | ADAMTS18    | NA                     | NA                                                                                                      | NA                               | NA          | NA |
| chr16 | 81253759 | 81253759 | A      | G      | exonic       | PKD1L2      | nonsynonymous SNV      | PKD1L2:NM_001076780:exon1:c.T217C:p.W73R                                                                | NA                               | rs9924371   | B  |
| chr16 | 81253917 | 81253917 | A      | G      | exonic       | PKD1L2      | nonsynonymous SNV      | PKD1L2:NM_001076780:exon1:c.T59C:p.V20A                                                                 | NA                               | rs9924530   | B  |
| chr16 | 82203742 | 82203742 | T      | C      | exonic       | MPHOSPH6    | synonymous SNV         | MPHOSPH6:NM_005792:exon1:c.A39G:p.L13L                                                                  | NA                               | rs1134847   | NA |
| chr16 | 82203758 | 82203758 | C      | T      | exonic       | MPHOSPH6    | nonsynonymous SNV      | MPHOSPH6:NM_005792:exon1:c.G23A:p.R8K                                                                   | NA                               | rs2303262   | B  |
| chr16 | 82203768 | 82203768 | G      | T      | exonic       | MPHOSPH6    | synonymous SNV         | MPHOSPH6:NM_005792:exon1:c.C13A:p.R5R                                                                   | NA                               | rs2303261   | NA |
| chr16 | 82203786 | 82203786 | C      | G      | UTR5         | MPHOSPH6    | NA                     | NA                                                                                                      | NA                               | rs2303260   | NA |
| chr16 | 84203833 | 84203833 | A      | C      | exonic       | DNAAF1      | nonsynonymous SNV      | DNAAF1:NM_178452:exon8:c.A1399C:p.T467P                                                                 | NA                               | NA          | P  |
| chr16 | 84203862 | 84203862 | A      | G      | exonic       | DNAAF1      | synonymous SNV         | DNAAF1:NM_178452:exon8:c.A1428G:p.S476S                                                                 | NA                               | NA          | NA |
| chr16 | 84522897 | 84522897 | G      | C      | exonic       | TLDC1       | nonsynonymous SNV      | TLDC1:NM_020947:exon4:c.C516G:p.D172E                                                                   | =COSM1128850;OCCURENCE=1(prostat | rs436278    | B  |
| chr16 | 85125545 | 85125546 | TT     | -      | UTR3         | KIAA0513    | NA                     | NA                                                                                                      | NA                               | NA          | NA |
| chr16 | 85707085 | 85707085 | A      | -      | UTR3         | GSE1        | NA                     | NA                                                                                                      | NA                               | NA          | NA |
| chr16 | 87493737 | 87493737 | T      | C      | exonic       | ZCCHC14     | nonsynonymous SNV      | ZCCHC14:NM_015144:exon2:c.A160G:p.I54V                                                                  | NA                               | rs11648852  | NA |
| chr16 | 87723838 | 87723838 | T      | C      | exonic       | JPH3        | synonymous SNV         | JPH3:NM_020655:exon4:c.T1872C:p.H624H                                                                   | NA                               | rs34767155  | NA |
| chr16 | 88497394 | 88497394 | T      | C      | exonic       | ZNF469      | synonymous SNV         | ZNF469:NM_001127464:exon2:c.T3432C:p.R1144R                                                             | NA                               | rs111557381 | NA |
| chr16 | 88947735 | 88947735 | G      | A      | exonic       | CBFA2T3     | nonsynonymous SNV      | 1_175931:exon8:c.C1108T:p.R370C, CBFA2T3:NM_005187:exon9:c.C13                                          | NA                               | rs202023439 | P  |
| chr16 | 89259993 | 89259993 | A      | G      | exonic       | CDH15       | synonymous SNV         | CDH15:NM_004933:exon12:c.A1971G:p.Q657Q                                                                 | NA                               | rs3815615   | NA |
| chr16 | 89777761 | 89777761 | C      | T      | exonic       | VPS9D1      | synonymous SNV         | VPS9D1:NM_004913:exon9:c.G807A:p.V269V                                                                  | NA                               | rs12920315  | NA |
| chr16 | 90061629 | 90061629 | T      | C      | ncRNA_exonic | AFG3L1P     | NA                     | NA                                                                                                      | NA                               | NA          | NA |
| chr16 | 90095573 | 90095573 | C      | T      | exonic       | C16orf3     | nonsynonymous SNV      | C16orf3:NM_001214:exon1:c.G178A:p.V60I                                                                  | NA                               | rs77382359  | NA |
| chr16 | 90095582 | 90095582 | T      | C      | exonic       | C16orf3     | nonsynonymous SNV      | C16orf3:NM_001214:exon1:c.A169G:p.S57G                                                                  | NA                               | rs62640380  | NA |
| chr16 | 90095596 | 90095596 | A      | G      | exonic       | C16orf3     | nonsynonymous SNV      | C16orf3:NM_001214:exon1:c.T155C:p.I52T                                                                  | NA                               | rs55742939  | NA |
| chr16 | 90095597 | 90095597 | T      | C      | exonic       | C16orf3     | nonsynonymous SNV      | C16orf3:NM_001214:exon1:c.A154G:p.I52V                                                                  | NA                               | rs61118444  | NA |
| chr16 | 90095620 | 90095620 | A      | G      | exonic       | C16orf3     | nonsynonymous SNV      | C16orf3:NM_001214:exon1:c.T131C:p.V44A                                                                  | NA                               | rs61740023  | NA |
| chr17 | 263367   | 263367   | A      | T      | exonic       | C17orf97    | nonsynonymous SNV      | C17orf97:NM_001013672:exon2:c.A733T:p.I245F                                                             | NA                               | rs35400518  | B  |
| chr17 | 263387   | 263387   | T      | C      | exonic       | C17orf97    | synonymous SNV         | C17orf97:NM_001013672:exon2:c.T753C:p.A251A                                                             | NA                               | rs34825436  | NA |
| chr17 | 292322   | 292324   | AAA    | -      | UTR3         | FAM101B     | NA                     | NA                                                                                                      | NA                               | NA          | NA |
| chr17 | 1326755  | 1326755  | A      | -      | UTR3         | CRK         | NA                     | NA                                                                                                      | NA                               | NA          | NA |
| chr17 | 1373612  | 1373612  | C      | T      | exonic       | MYO1C       | nonsynonymous SNV      | 3A:p.V795I, MYO1C:NM_001080950:exon24:c.G2326A:p.V776I, MYO1C                                           | NA                               | rs8081370   | NA |
| chr17 | 1606883  | 1606883  | T      | G      | UTR3         | TLCD2       | NA                     | NA                                                                                                      | NA                               | rs8068949   | NA |
| chr17 | 1607517  | 1607517  | -      | A      | UTR3         | TLCD2       | NA                     | NA                                                                                                      | NA                               | NA          | NA |
| chr17 | 1609930  | 1609930  | G      | A      | UTR3         | TLCD2       | NA                     | NA                                                                                                      | NA                               | rs4790808   | NA |
| chr17 | 1960044  | 1960044  | C      | A      | exonic       | HIC1        | nonsynonymous SNV      | v1_001098202:exon2:c.C117A:p.N39K, HIC1:NM_006497:exon2:c.C60A                                          | NA                               | NA          | B  |
| chr17 | 2287891  | 2287891  | -      | GTGTGT | UTR3         | MNT         | NA                     | NA                                                                                                      | NA                               | NA          | NA |
| chr17 | 2310332  | 2310332  | G      | A      | ncRNA_exonic | LOC284009   | NA                     | NA                                                                                                      | NA                               | rs74415860  | NA |
| chr17 | 2883588  | 2883588  | C      | A      | exonic       | RAP1GAP2    | nonsynonymous SNV      | _001100398:exon8:c.C559A:p.L187M, RAP1GAP2:NM_015085:exon9:c.                                           | NA                               | rs17762452  | NA |
| chr17 | 2929392  | 2929392  | G      | A      | exonic       | RAP1GAP2    | synonymous SNV         | 01100398:exon19:c.G1797A:p.P599P, RAP1GAP2:NM_015085:exon20:c.C117A:p.N39K, HIC1:NM_006497:exon2:c.C60A | NA                               | rs55904912  | NA |
| chr17 | 2940848  | 2940851  | AGTG   | -      | UTR3         | RAP1GAP2    | NA                     | NA                                                                                                      | NA                               | NA          | NA |
| chr17 | 3343406  | 3343406  | G      | A      | UTR3         | SPATA22     | NA                     | NA                                                                                                      | NA                               | rs2257732   | NA |
| chr17 | 3352294  | 3352294  | A      | G      | exonic       | SPATA22     | nonsynonymous SNV      | 4_001170697:exon6:c.T479C:p.I160T, SPATA22:NM_001170698:exon6:c.                                        | NA                               | rs1488689   | B  |
| chr17 | 3352331  | 3352331  | C      | T      | exonic       | SPATA22     | nonsynonymous SNV      | 001170697:exon6:c.G442A:p.V148M, SPATA22:NM_001170698:exon6:c.                                          | NA                               | rs1488690   | B  |
| chr17 | 3445901  | 3445901  | T      | G      | exonic       | TRPV3       | synonymous SNV         | 4_001258205:exon6:c.A558C:p.I186I, TRPV3:NM_145068:exon6:c.A55I                                         | NA                               | rs11078458  | NA |
| chr17 | 3627473  | 3627473  | C      | T      | exonic       | GSG2        | nonsynonymous SNV      | GSG2:NM_031965:exon1:c.C244T:p.R82C                                                                     | NA                               | rs9907144   | D  |
| chr17 | 4066687  | 4066687  | G      | -      | UTR3         | ANKFY1      | NA                     | NA                                                                                                      | NA                               | rs11307002  | NA |
| chr17 | 5037195  | 5037195  | G      | A      | exonic       | USP6        | nonsynonymous SNV      | USP6:NM_004505:exon7:c.G398A:p.R133K                                                                    | NA                               | rs74900103  | NA |
| chr17 | 5288983  | 5288983  | T      | C      | UTR3         | RABEP1      | NA                     | NA                                                                                                      | NA                               | rs7426      | NA |
| chr17 | 6328628  | 6328628  | T      | -      | UTR3         | AIPL1       | NA                     | NA                                                                                                      | NA                               | NA          | NA |
| chr17 | 6350949  | 6350949  | A      | C      | exonic       | FAM64A      | nonsynonymous SNV      | _001195228:exon3:c.A461C:p.D154A, FAM64A:NM_019013:exon3:c.A4                                           | NA                               | NA          | B  |
| chr17 | 6355187  | 6355187  | A      | C      | UTR3         | PITPNM3     | NA                     | NA                                                                                                      | NA                               | NA          | NA |
| chr17 | 6355210  | 6355210  | G      | C      | UTR3         | PITPNM3     | NA                     | NA                                                                                                      | NA                               | NA          | NA |
| chr17 | 6556194  | 6556194  | -      | AGAAG  | UTR3         | C17orf100   | NA                     | NA                                                                                                      | NA                               | rs144808411 | NA |
| chr17 | 6690858  | 6690858  | -      | T      | UTR3         | FBXO39      | NA                     | NA                                                                                                      | NA                               | NA          | NA |
| chr17 | 6983433  | 6983433  | C      | T      | UTR5         | CLEC10A     | NA                     | NA                                                                                                      | NA                               | rs148814818 | NA |
| chr17 | 7093397  | 7093397  | A      | -      | UTR3         | DLG4        | NA                     | NA                                                                                                      | NA                               | rs5819149   | NA |
| chr17 | 7097648  | 7097648  | T      | G      | exonic       | DLG4        | nonsynonymous SNV      | 01128827:exon12:c.A1459C:p.S487R, DLG4:NM_001365:exon14:c.A15                                           | NA                               | NA          | NA |
| chr17 | 7215397  | 7215397  | A      | G      | UTR3         | EIF5A       | NA                     | NA                                                                                                      | NA                               | NA          | NA |
| chr17 | 7475159  | 7475159  | A      | T      | ncRNA_UTR3   | SEN3        | NA                     | NA                                                                                                      | NA                               | rs1133249   | NA |
| chr17 | 7482019  | 7482019  | A      | -      | ncRNA_exonic | SEN3-EIF4A1 | NA                     | NA                                                                                                      | NA                               | NA          | NA |
| chr17 | 7658285  | 7658285  | A      | -      | ncRNA_exonic | RPL29P2     | NA                     | NA                                                                                                      | NA                               | NA          | NA |
| chr17 | 7750178  | 7750183  | ACCACC | -      | exonic       | KDM6B       | nonframeshift deletion | KDM6B:NM_001080424:exon9:c.753_758del:p.251_253del                                                      | NA                               | NA          | NA |
| chr17 | 7751859  | 7751864  | CACCAC | -      | exonic       | KDM6B       | nonframeshift deletion | KDM6B:NM_001080424:exon11:c.2253_2258del:p.751_753del                                                   | NA                               | NA          | NA |

|       |          |          |     |    |              |               |                   |                                                                                                |            |             |    |
|-------|----------|----------|-----|----|--------------|---------------|-------------------|------------------------------------------------------------------------------------------------|------------|-------------|----|
| chr17 | 7757725  | 7757725  | -   | A  | UTR3         | KDM6B         | NA                | NA                                                                                             | NA         | rs112843870 | NA |
| chr17 | 7942901  | 7942901  | C   | G  | exonic       | ALOX15B       | synonymous SNV    | 5G:p.T115T,ALOX15B:NM_001039131:exon2:c.C345G:p.T115T,ALOX15                                   | NA         | rs76589243  | NA |
| chr17 | 8064081  | 8064081  | -   | G  | UTR3         | VAMP2         | NA                | NA                                                                                             | NA         | NA          | NA |
| chr17 | 8173199  | 8173199  | T   | -  | UTR3         | PFAS          | NA                | NA                                                                                             | NA         | NA          | NA |
| chr17 | 8173767  | 8173767  | C   | T  | UTR3         | PFAS          | NA                | NA                                                                                             | NA         | rs1132554   | NA |
| chr17 | 8215408  | 8215408  | T   | C  | exonic       | ARHGEF15      | synonymous SNV    | :NM_025014:exon2:c.T51C:p.P17P,ARHGEF15:NM_173728:exon2:c.T5                                   | NA         | NA          | NA |
| chr17 | 8215425  | 8215425  | G   | C  | exonic       | ARHGEF15      | nonsynonymous SNV | :NM_025014:exon2:c.G68C:p.R23P,ARHGEF15:NM_173728:exon2:c.G                                    | NA         | NA          | P  |
| chr17 | 8633310  | 8633310  | C   | T  | UTR3         | CCDC42        | NA                | NA                                                                                             | NA         | rs1971773   | NA |
| chr17 | 10618236 | 10618236 | -   | AA | UTR3         | TMEM220       | NA                | NA                                                                                             | NA         | NA          | NA |
| chr17 | 12668632 | 12668632 | A   | -  | UTR3         | MYOCD         | NA                | NA                                                                                             | NA         | rs200654104 | NA |
| chr17 | 15531723 | 15531723 | A   | -  | UTR3         | TRIM16        | NA                | NA                                                                                             | NA         | NA          | NA |
| chr17 | 15622453 | 15622453 | A   | -  | UTR3         | ZNF286A       | NA                | NA                                                                                             | NA         | NA          | NA |
| chr17 | 16285320 | 16285320 | G   | A  | exonic       | UBB           | synonymous SNV    | UBB:NM_018955:exon2:c.G99A:p.K33K                                                              | NA         | NA          | NA |
| chr17 | 16842912 | 16842912 | A   | G  | exonic       | TNFRSF13B     | synonymous SNV    | TNFRSF13B:NM_012452:exon5:c.T831C:p.S277S                                                      | NA         | rs11078355  | NA |
| chr17 | 16979078 | 16979078 | G   | T  | exonic       | MPRIP         | nonsynonymous SNV | IM_015134:exon2:c.G178T:p.D60Y,MPRIP:NM_201274:exon2:c.G178T                                   | NA         | NA          | NA |
| chr17 | 17115873 | 17115873 | T   | G  | UTR3         | FLCN          | NA                | NA                                                                                             | NA         | NA          | NA |
| chr17 | 18024013 | 18024013 | A   | G  | exonic       | MYO15A        | synonymous SNV    | MYO15A:NM_016239:exon2:c.A1899G:p.P633P                                                        | NA         | rs2955366   | NA |
| chr17 | 18327352 | 18327352 | C   | T  | ncRNA_exonic | LOC339240     | NA                | NA                                                                                             | NA         | rs3869522   | NA |
| chr17 | 18573286 | 18573288 | TTG | -  | ncRNA_exonic | FOXO3B        | NA                | NA                                                                                             | NA         | rs200452589 | NA |
| chr17 | 18682505 | 18682505 | T   | C  | exonic       | FBXW10        | nonsynonymous SNV | 267586:exon13:c.T2894C:p.V965A,FBXW10:NM_001267585:exon14:c.)=COSM436168;OCCURENCE=1(prostat   | rs1024657  | B           |    |
| chr17 | 18682632 | 18682632 | A   | G  | UTR3         | FBXW10        | NA                | NA                                                                                             | NA         | rs2014354   | NA |
| chr17 | 18694277 | 18694277 | G   | A  | exonic       | TVP23B        | nonsynonymous SNV | TVP23B:NM_016078:exon3:c.G164A:p.G55E                                                          | NA         | rs61075345  | B  |
| chr17 | 20163529 | 20163529 | A   | G  | exonic       | SPECC1        | synonymous SNV    | p.A873A,SPECC1:NM_001033553:exon12:c.A2862G:p.A954A,SPECC1:l                                   | NA         | rs2703791   | NA |
| chr17 | 20768134 | 20768134 | C   | T  | UTR3         | CCDC144NL     | NA                | NA                                                                                             | NA         | rs201667905 | NA |
| chr17 | 20768143 | 20768143 | G   | A  | UTR3         | CCDC144NL     | NA                | NA                                                                                             | NA         | NA          | NA |
| chr17 | 20768314 | 20768314 | A   | G  | UTR3         | CCDC144NL     | NA                | NA                                                                                             | NA         | rs77283162  | NA |
| chr17 | 20768333 | 20768333 | G   | A  | UTR3         | CCDC144NL     | NA                | NA                                                                                             | NA         | rs113358321 | NA |
| chr17 | 20768342 | 20768342 | A   | C  | UTR3         | CCDC144NL     | NA                | NA                                                                                             | NA         | rs75123357  | NA |
| chr17 | 20768390 | 20768390 | C   | A  | UTR3         | CCDC144NL     | NA                | NA                                                                                             | NA         | rs146578750 | NA |
| chr17 | 20768608 | 20768608 | G   | A  | UTR3         | CCDC144NL     | NA                | NA                                                                                             | NA         | rs4347684   | NA |
| chr17 | 21117837 | 21117837 | T   | C  | UTR5         | TMEM11        | NA                | NA                                                                                             | NA         | rs4985988   | NA |
| chr17 | 21203964 | 21203964 | C   | G  | exonic       | MAP2K3        | synonymous SNV    | IM_002756:exon4:c.C186G:p.A62A,MAP2K3:NM_145109:exon4:c.C27;OCCURENCE=1(haematopoietic_and_l   | rs34458870 | NA          |    |
| chr17 | 21204290 | 21204290 | G   | C  | exonic       | MAP2K3        | synonymous SNV    | V_002756:exon5:c.G297C:p.G99G,MAP2K3:NM_145109:exon5:c.G384;OCCURENCE=2(haematopoietic_and_l   | rs2305872  | NA          |    |
| chr17 | 21207834 | 21207834 | C   | T  | exonic       | MAP2K3        | nonsynonymous SNV | V_002756:exon8:c.C578T:p.T193M,MAP2K3:NM_145109:exon8:c.C66                                    | NA         | rs58609466  | D  |
| chr17 | 21217727 | 21217727 | T   | C  | UTR3         | MAP2K3        | NA                | NA                                                                                             | NA         | rs2363370   | NA |
| chr17 | 21217764 | 21217764 | G   | A  | UTR3         | MAP2K3        | NA                | NA                                                                                             | NA         | rs2363192   | NA |
| chr17 | 21311916 | 21311916 | C   | T  | UTR5         | KCNJ12,KCNJ18 | NA                | NA                                                                                             | NA         | rs1657716   | NA |
| chr17 | 21311940 | 21311940 | T   | C  | UTR5         | KCNJ12,KCNJ18 | NA                | NA                                                                                             | NA         | rs1714903   | NA |
| chr17 | 21319407 | 21319407 | C   | T  | exonic       | KCNJ12,KCNJ18 | synonymous SNV    | V_001194958:exon3:c.C753T:p.I251I,KCNJ12:NM_021012:exon3:c.C75                                 | NA         | rs16962951  | NA |
| chr17 | 21319436 | 21319436 | G   | A  | exonic       | KCNJ12,KCNJ18 | nonsynonymous SNV | _001194958:exon3:c.G782A:p.R261H,KCNJ12:NM_021012:exon3:c.G75 ID=COSM312197;OCCURENCE=1(lung)  | rs77270326 | P           |    |
| chr17 | 21319439 | 21319439 | T   | G  | exonic       | KCNJ12,KCNJ18 | nonsynonymous SNV | 1_001194958:exon3:c.T785G:p.I262S,KCNJ12:NM_021012:exon3:c.T75 ID=COSM312198;OCCURENCE=1(lung) | rs76684759 | P           |    |
| chr17 | 21319452 | 21319452 | G   | A  | exonic       | KCNJ12,KCNJ18 | synonymous SNV    | _001194958:exon3:c.G798A:p.S266S,KCNJ12:NM_021012:exon3:c.G75                                  | NA         | rs73313929  | NA |
| chr17 | 21319465 | 21319465 | T   | C  | exonic       | KCNJ12,KCNJ18 | synonymous SNV    | 1_001194958:exon3:c.T811C:p.L271L,KCNJ12:NM_021012:exon3:c.T81 ID=COSM312199;OCCURENCE=1(lung) | rs77724065 | NA          |    |
| chr17 | 21322607 | 21322607 | -   | GT | UTR3         | KCNJ12        | NA                | NA                                                                                             | NA         | NA          | NA |
| chr17 | 21323033 | 21323033 | C   | T  | UTR3         | KCNJ12        | NA                | NA                                                                                             | NA         | rs72842126  | NA |
| chr17 | 21323034 | 21323034 | G   | A  | UTR3         | KCNJ12        | NA                | NA                                                                                             | NA         | rs72842128  | NA |
| chr17 | 21323049 | 21323049 | C   | T  | UTR3         | KCNJ12        | NA                | NA                                                                                             | NA         | rs75724776  | NA |
| chr17 | 25640280 | 25640280 | -   | T  | UTR3         | WSB1          | NA                | NA                                                                                             | NA         | NA          | NA |
| chr17 | 26206414 | 26206414 | C   | A  | UTR3         | LYRM9         | NA                | NA                                                                                             | NA         | rs3751972   | NA |
| chr17 | 26522009 | 26522009 | -   | CA | UTR3         | NLK           | NA                | NA                                                                                             | NA         | NA          | NA |
| chr17 | 26653991 | 26653991 | T   | -  | UTR3         | TMEM97        | NA                | NA                                                                                             | NA         | rs71748594  | NA |
| chr17 | 27187789 | 27187789 | C   | T  | UTR3         | ERAL1         | NA                | NA                                                                                             | NA         | rs6803      | NA |
| chr17 | 28523383 | 28523383 | T   | -  | UTR3         | SLC6A4        | NA                | NA                                                                                             | NA         | NA          | NA |
| chr17 | 29302644 | 29302644 | C   | A  | ncRNA_exonic | DPRXP4        | NA                | NA                                                                                             | NA         | NA          | NA |
| chr17 | 29644387 | 29644388 | AC  | -  | UTR3         | EVI2A         | NA                | NA                                                                                             | NA         | rs111459872 | NA |
| chr17 | 29862282 | 29862282 | A   | -  | UTR3         | RAB11FIP4     | NA                | NA                                                                                             | NA         | rs35637322  | NA |
| chr17 | 33307586 | 33307586 | G   | A  | UTR5         | LIG3          | NA                | NA                                                                                             | NA         | rs12945428  | NA |
| chr17 | 33448818 | 33448818 | T   | C  | exonic       | FNDC8         | nonsynonymous SNV | FNDC8:NM_017559:exon1:c.T106C:p.S36P                                                           | NA         | rs1871892   | B  |
| chr17 | 33881718 | 33881718 | G   | A  | exonic       | SLFN14        | nonsynonymous SNV | SLFN14:NM_001129820:exon2:c.C1066T:p.P356S                                                     | NA         | rs321613    | NA |
| chr17 | 34151149 | 34151149 | T   | G  | exonic       | TAF15         | synonymous SNV    | V_003487:exon7:c.T543G:p.G181G,TAF15:NM_139215:exon7:c.T552G                                   | NA         | NA          | NA |
| chr17 | 34151164 | 34151164 | A   | G  | exonic       | TAF15         | synonymous SNV    | V_003487:exon7:c.A558G:p.G186G,TAF15:NM_139215:exon7:c.A567C                                   | NA         | NA          | NA |
| chr17 | 34195864 | 34195864 | G   | T  | UTR5         | C17orf66      | NA                | NA                                                                                             | NA         | NA          | NA |
| chr17 | 36715976 | 36715976 | T   | G  | exonic       | SRCIN1        | nonsynonymous SNV | SRCIN1:NM_025248:exon10:c.A1870C:p.T624P                                                       | NA         | NA          | NA |
| chr17 | 36896661 | 36896661 | C   | T  | UTR5         | PCGF2         | NA                | NA                                                                                             | NA         | rs182900980 | NA |
| chr17 | 37366899 | 37366899 | -   | G  | UTR3         | STAC2         | NA                | NA                                                                                             | NA         | rs35966204  | NA |
| chr17 | 37367542 | 37367542 | -   | T  | UTR3         | STAC2         | NA                | NA                                                                                             | NA         | NA          | NA |



|       |          |          |          |        |              |           |                   |                                                                |    |             |    |
|-------|----------|----------|----------|--------|--------------|-----------|-------------------|----------------------------------------------------------------|----|-------------|----|
| chr17 | 37562812 | 37562812 | -        | T      | UTR3         | MED1      | NA                | NA                                                             | NA | rs11443056  | NA |
| chr17 | 37761057 | 37761057 | G        | T      | UTR3         | NEUROD2   | NA                | NA                                                             | NA | NA          | NA |
| chr17 | 37761061 | 37761061 | G        | T      | UTR3         | NEUROD2   | NA                | NA                                                             | NA | NA          | NA |
| chr17 | 38028634 | 38028634 | G        | T      | exonic       | ZBP2      | nonsynonymous SNV | IM_198844:exon4:c.G452T;p.S151I,ZBP2:NM_199321:exon5:c.G518T   | NA | rs11557467  | P  |
| chr17 | 38133914 | 38133914 | -        | A      | UTR3         | GSDMA     | NA                | NA                                                             | NA | NA          | NA |
| chr17 | 38175428 | 38175428 | -        | ACACAC | UTR3         | MED24     | NA                | NA                                                             | NA | NA          | NA |
| chr17 | 38510712 | 38510712 | T        | A      | exonic       | RARA      | nonsynonymous SNV | _001024809:exon6:c.T951A;p.D317E,RARA:NM_000964:exon7:c.T966   | NA | NA          | D  |
| chr17 | 38510716 | 38510716 | G        | C      | exonic       | RARA      | nonsynonymous SNV | _001024809:exon6:c.G955C;p.A319P,RARA:NM_000964:exon7:c.G970   | NA | NA          | P  |
| chr17 | 38510717 | 38510717 | C        | G      | exonic       | RARA      | nonsynonymous SNV | _001024809:exon6:c.C956G;p.A319G,RARA:NM_000964:exon7:c.C971   | NA | NA          | P  |
| chr17 | 38510719 | 38510719 | G        | A      | exonic       | RARA      | nonsynonymous SNV | _001024809:exon6:c.G958A;p.E320K,RARA:NM_000964:exon7:c.G973   | NA | NA          | D  |
| chr17 | 38974612 | 38974612 | T        | C      | UTR3         | KRT10     | NA                | NA                                                             | NA | rs1132367   | NA |
| chr17 | 39211189 | 39211189 | C        | G      | exonic       | KRTAP2-2  | nonsynonymous SNV | KRTAP2-2:NM_033032:exon1:c.G275C;p.C92S                        | NA | NA          | NA |
| chr17 | 39240641 | 39240641 | A        | G      | exonic       | KRTAP4-7  | synonymous SNV    | KRTAP4-7:NM_033061:exon1:c.A183G;p.Q61Q                        | NA | NA          | NA |
| chr17 | 39240653 | 39240653 | T        | C      | exonic       | KRTAP4-7  | synonymous SNV    | KRTAP4-7:NM_033061:exon1:c.T195C;p.C65C                        | NA | NA          | NA |
| chr17 | 39395019 | 39395019 | G        | T      | UTR3         | KRTAP9-8  | NA                | NA                                                             | NA | rs74975222  | NA |
| chr17 | 39727816 | 39727816 | T        | G      | exonic       | KRT9      | synonymous SNV    | KRT9:NM_000226:exon1:c.A429C;p.G143G                           | NA | rs8075921   | NA |
| chr17 | 39728050 | 39728050 | G        | A      | exonic       | KRT9      | synonymous SNV    | KRT9:NM_000226:exon1:c.C195T;p.G65G                            | NA | rs8070680   | NA |
| chr17 | 39958344 | 39958344 | T        | C      | UTR3         | LEPREL4   | NA                | NA                                                             | NA | rs1061843   | NA |
| chr17 | 40023618 | 40023618 | A        | -      | UTR3         | ACLY      | NA                | NA                                                             | NA | NA          | NA |
| chr17 | 40465437 | 40465437 | T        | A      | UTR3         | STAT3     | NA                | NA                                                             | NA | NA          | NA |
| chr17 | 41031195 | 41031195 | -        | A      | ncRNA_exonic | LINC00671 | NA                | NA                                                             | NA | NA          | NA |
| chr17 | 41064988 | 41064995 | TTTTAGAA | -      | UTR3         | G6PC      | NA                | NA                                                             | NA | rs71157674  | NA |
| chr17 | 41120550 | 41120550 | A        | -      | UTR3         | PTGES3L   | NA                | NA                                                             | NA | rs71690436  | NA |
| chr17 | 41133071 | 41133071 | T        | C      | exonic       | RUNDC1    | nonsynonymous SNV | RUNDC1:NM_173079:exon1:c.T478C;p.W160R                         | NA | rs1708875   | B  |
| chr17 | 41181922 | 41181924 | AAA      | -      | UTR3         | RND2      | NA                | NA                                                             | NA | NA          | NA |
| chr17 | 42266722 | 42266722 | A        | G      | exonic       | TMUB2     | nonsynonymous SNV | 3:p.E103G,TMUB2:NM_177441:exon2:c.A308G;p.E103G,TMUB2:NM_(     | NA | NA          | D  |
| chr17 | 42266741 | 42266741 | T        | G      | exonic       | TMUB2     | synonymous SNV    | 5:p.G109G,TMUB2:NM_177441:exon2:c.T327G;p.G109G,TMUB2:NM_(     | NA | NA          | NA |
| chr17 | 42747647 | 42747647 | G        | A      | intronic     | C17orf104 | NA                | NA                                                             | NA | rs199529649 | NA |
| chr17 | 42747657 | 42747657 | G        | A      | intronic     | C17orf104 | NA                | NA                                                             | NA | NA          | NA |
| chr17 | 42747947 | 42747947 | A        | C      | intronic     | C17orf104 | NA                | NA                                                             | NA | NA          | NA |
| chr17 | 42876925 | 42876925 | -        | A      | UTR3         | GJC1      | NA                | NA                                                             | NA | NA          | NA |
| chr17 | 42878302 | 42878302 | A        | -      | UTR3         | GJC1      | NA                | NA                                                             | NA | NA          | NA |
| chr17 | 44412780 | 44412780 | A        | G      | UTR3         | ARL17A    | NA                | NA                                                             | NA | rs62073354  | NA |
| chr17 | 44950122 | 44950122 | T        | C      | exonic       | WNT9B     | nonsynonymous SNV | WNT9B:NM_003396:exon2:c.T317C;p.M106T                          | NA | rs4968281   | NA |
| chr17 | 45214604 | 45214604 | A        | T      | exonic       | CDC27     | nonsynonymous SNV | 1114091:exon14:c.T1845A;p.H615Q,CDC27:NM_001256:exon14:c.T1    | NA | rs75661039  | NA |
| chr17 | 45214605 | 45214605 | T        | C      | exonic       | CDC27     | nonsynonymous SNV | 1114091:exon14:c.A1844G;p.H615R,CDC27:NM_001256:exon14:c.A1    | NA | rs76926116  | NA |
| chr17 | 45214643 | 45214643 | A        | C      | exonic       | CDC27     | synonymous SNV    | 1114091:exon14:c.T1806G;p.V602V,CDC27:NM_001256:exon14:c.T1    | NA | rs138020641 | NA |
| chr17 | 45214682 | 45214682 | A        | G      | exonic       | CDC27     | synonymous SNV    | 1114091:exon14:c.T1767C;p.H589H,CDC27:NM_001256:exon14:c.T1    | NA | rs62075622  | NA |
| chr17 | 45214690 | 45214690 | G        | A      | exonic       | CDC27     | nonsynonymous SNV | 1114091:exon14:c.C1759T;p.R587W,CDC27:NM_001256:exon14:c.C1    | NA | rs74390782  | NA |
| chr17 | 46669247 | 46669247 | T        | -      | ncRNA_UTR3   | HOXB5     | NA                | NA                                                             | NA | NA          | NA |
| chr17 | 46802286 | 46802286 | T        | C      | UTR3         | HOXB13    | NA                | NA                                                             | NA | NA          | NA |
| chr17 | 46802323 | 46802323 | G        | C      | UTR3         | HOXB13    | NA                | NA                                                             | NA | NA          | NA |
| chr17 | 46802341 | 46802341 | T        | C      | UTR3         | HOXB13    | NA                | NA                                                             | NA | NA          | NA |
| chr17 | 46941419 | 46941419 | G        | T      | UTR3         | CALCOCO2  | NA                | NA                                                             | NA | rs6504584   | NA |
| chr17 | 47132505 | 47132505 | A        | -      | UTR3         | IGF2BP1   | NA                | NA                                                             | NA | NA          | NA |
| chr17 | 47132517 | 47132517 | A        | C      | UTR3         | IGF2BP1   | NA                | NA                                                             | NA | rs56112814  | NA |
| chr17 | 47132531 | 47132531 | T        | A      | UTR3         | IGF2BP1   | NA                | NA                                                             | NA | NA          | NA |
| chr17 | 47133198 | 47133198 | -        | T      | UTR3         | IGF2BP1   | NA                | NA                                                             | NA | NA          | NA |
| chr17 | 47373328 | 47373330 | CAG      | -      | UTR3         | ZNF652    | NA                | NA                                                             | NA | NA          | NA |
| chr17 | 48046626 | 48046626 | -        | G      | UTR5         | DLX4      | NA                | NA                                                             | NA | rs71352544  | NA |
| chr17 | 48046963 | 48046963 | A        | G      | exonic       | DLX4      | nonsynonymous SNV | DLX4:NM_138281:exon1:c.A131G;p.N44S                            | NA | rs61749026  | B  |
| chr17 | 48151353 | 48151353 | T        | C      | exonic       | ITGA3     | synonymous SNV    | 1_002204:exon8:c.T1230C;p.L410L,ITGA3:NM_005501:exon8:c.T1230C | NA | rs2285524   | NA |
| chr17 | 48262615 | 48262615 | A        | T      | UTR3         | COL1A1    | NA                | NA                                                             | NA | NA          | NA |
| chr17 | 48267226 | 48267226 | A        | G      | exonic       | COL1A1    | synonymous SNV    | COL1A1:NM_000088:exon37:c.T2607C;p.G869G                       | NA | NA          | NA |
| chr17 | 48768770 | 48768770 | C        | A      | UTR3         | ABCC3     | NA                | NA                                                             | NA | NA          | NA |
| chr17 | 48772571 | 48772571 | C        | G      | UTR3         | ANKRD40   | NA                | NA                                                             | NA | NA          | NA |
| chr17 | 49197932 | 49197932 | C        | A      | exonic       | SPAG9     | nonsynonymous SNV | .G86T;p.G29V,SPAG9:NM_001130528:exon1:c.G86T;p.G29V,SPAG9:NM   | NA | NA          | P  |
| chr17 | 49350802 | 49350802 | A        | C      | exonic       | UTP18     | synonymous SNV    | UTP18:NM_016001:exon5:c.A702C;p.G234G                          | NA | rs2318789   | NA |
| chr17 | 53241197 | 53241197 | -        | A      | UTR3         | STXBP4    | NA                | NA                                                             | NA | rs11387036  | NA |
| chr17 | 53828706 | 53828706 | C        | G      | UTR5         | PCTP      | NA                | NA                                                             | NA | rs890488    | NA |
| chr17 | 54450134 | 54450134 | G        | A      | exonic       | ANKFN1    | synonymous SNV    | ANKFN1:NM_153228:exon6:c.G738A;p.K246K                         | NA | rs8069322   | NA |
| chr17 | 54672363 | 54672363 | A        | C      | UTR3         | NOG       | NA                | NA                                                             | NA | rs1442829   | NA |
| chr17 | 54672366 | 54672366 | A        | C      | UTR3         | NOG       | NA                | NA                                                             | NA | NA          | NA |
| chr17 | 54672393 | 54672394 | TT       | -      | UTR3         | NOG       | NA                | NA                                                             | NA | NA          | NA |
| chr17 | 54912339 | 54912339 | G        | A      | exonic       | DGKE      | synonymous SNV    | DGKE:NM_003647:exon2:c.G183A;p.G61G                            | NA | rs1048159   | NA |
| chr17 | 55940421 | 55940421 | A        | -      | UTR3         | CUEDC1    | NA                | NA                                                             | NA | rs11335586  | NA |



|       |          |          |          |        |              |           |                   |                                                               |    |             |    |
|-------|----------|----------|----------|--------|--------------|-----------|-------------------|---------------------------------------------------------------|----|-------------|----|
| chr17 | 59943721 | 59943721 | A        | -      | UTR3         | INTS2     | NA                | NA                                                            | NA | NA          | NA |
| chr17 | 60020017 | 60020017 | -        | T      | UTR3         | MED13     | NA                | NA                                                            | NA | NA          | NA |
| chr17 | 60342186 | 60342186 | T        | C      | ncRNA_exonic | TBC1D3P2  | NA                | NA                                                            | NA | rs11550753  | NA |
| chr17 | 62122727 | 62122727 | A        | G      | exonic       | ERN1      | nonsynonymous SNV | ERN1:NM_001433:exon20:c.T2645C:p.L882P                        | NA | NA          | NA |
| chr17 | 62399872 | 62399872 | C        | T      | UTR3         | PECAM1    | NA                | NA                                                            | NA | rs9902260   | NA |
| chr17 | 62892413 | 62892413 | G        | A      | exonic       | LRRC37A3  | synonymous SNV    | LRRC37A3:NM_199340:exon3:c.C963T:p.A321A                      | NA | rs3894937   | NA |
| chr17 | 62892442 | 62892442 | G        | C      | exonic       | LRRC37A3  | nonsynonymous SNV | LRRC37A3:NM_199340:exon3:c.C934G:p.P312A                      | NA | rs201370086 | P  |
| chr17 | 64208285 | 64208285 | C        | G      | exonic       | APOH      | nonsynonymous SNV | APOH:NM_000042:exon8:c.G1004C:p.W335S                         | NA | rs1801690   | D  |
| chr17 | 65070977 | 65070977 | A        | -      | UTR3         | HELZ      | NA                | NA                                                            | NA | rs199909135 | NA |
| chr17 | 65073836 | 65073836 | A        | -      | UTR3         | HELZ      | NA                | NA                                                            | NA | NA          | NA |
| chr17 | 65074050 | 65074050 | T        | -      | UTR3         | HELZ      | NA                | NA                                                            | NA | NA          | NA |
| chr17 | 66129341 | 66129341 | T        | -      | ncRNA_exonic | LINC00674 | NA                | NA                                                            | NA | NA          | NA |
| chr17 | 66196220 | 66196220 | C        | A      | ncRNA_exonic | LOC440461 | NA                | NA                                                            | NA | NA          | NA |
| chr17 | 67017930 | 67017930 | T        | C      | exonic       | ABCA9     | nonsynonymous SNV | ABCA9:NM_080283:exon18:c.A2354G:p.N785S                       | NA | rs17684521  | D  |
| chr17 | 68131149 | 68131149 | T        | -      | UTR3         | KCNJ16    | NA                | NA                                                            | NA | NA          | NA |
| chr17 | 71745520 | 71745520 | A        | G      | ncRNA_exonic | LINC00469 | NA                | NA                                                            | NA | rs12450057  | NA |
| chr17 | 72270424 | 72270433 | GCCGCGAC | -      | UTR5         | DNAI2     | NA                | NA                                                            | NA | rs140867882 | NA |
| chr17 | 72350362 | 72350362 | G        | A      | exonic       | KIF19     | synonymous SNV    | KIF19:NM_153209:exon18:c.G2370A:p.S790S                       | NA | rs72852235  | NA |
| chr17 | 72443258 | 72443258 | T        | C      | UTR3         | GPRC5C    | NA                | NA                                                            | NA | NA          | NA |
| chr17 | 72521897 | 72521897 | G        | A      | exonic       | CD300LB   | synonymous SNV    | CD300LB:NM_174892:exon2:c.C471T:p.I157I                       | NA | rs17553512  | NA |
| chr17 | 72869078 | 72869078 | A        | G      | UTR5         | FDXR      | NA                | NA                                                            | NA | rs492095    | NA |
| chr17 | 72875677 | 72875677 | G        | T      | exonic       | FADS6     | nonsynonymous SNV | FADS6:NM_178128:exon5:c.C763A:p.P255T                         | NA | NA          | NA |
| chr17 | 73234012 | 73234012 | C        | T      | UTR3         | GGA3      | NA                | NA                                                            | NA | rs113574403 | NA |
| chr17 | 73498623 | 73498623 | A        | G      | exonic       | CASKIN2   | synonymous SNV    | 01142643:exon17:c.T2286C:p.S762S,CASKIN2:NM_020753:exon18:c.T | NA | rs7502835   | NA |
| chr17 | 73498796 | 73498796 | T        | G      | exonic       | CASKIN2   | nonsynonymous SNV | 01142643:exon17:c.A2113C:p.T705P,CASKIN2:NM_020753:exon18:c./ | NA | NA          | B  |
| chr17 | 73498833 | 73498833 | T        | G      | exonic       | CASKIN2   | synonymous SNV    | 01142643:exon17:c.A2076C:p.A692A,CASKIN2:NM_020753:exon18:c./ | NA | NA          | NA |
| chr17 | 73926121 | 73926121 | C        | A      | exonic       | FBF1      | nonsynonymous SNV | FBF1:NM_001080542:exon6:c.G194T:p.G65V                        | NA | rs1135889   | NA |
| chr17 | 73949540 | 73949540 | G        | C      | exonic       | ACOX1     | nonsynonymous SNV | 822G:p.I274M,ACOX1:NM_004035:exon7:c.C936G:p.I312M,ACOX1:NM   | NA | rs1135640   | B  |
| chr17 | 74288298 | 74288298 | A        | T      | exonic       | QRICH2    | nonsynonymous SNV | QRICH2:NM_032134:exon4:c.T2012A:p.V671D                       | NA | NA          | B  |
| chr17 | 74288943 | 74288943 | C        | T      | exonic       | QRICH2    | stopgain SNV      | QRICH2:NM_032134:exon4:c.G1367A:p.W456X                       | NA | NA          | NA |
| chr17 | 74288944 | 74288944 | A        | G      | exonic       | QRICH2    | nonsynonymous SNV | QRICH2:NM_032134:exon4:c.T1366C:p.W456R                       | NA | rs11869057  | B  |
| chr17 | 74675810 | 74675810 | G        | A      | UTR3         | MXRA7     | NA                | NA                                                            | NA | rs1065604   | NA |
| chr17 | 74922706 | 74922706 | C        | T      | exonic       | MGAT5B    | synonymous SNV    | p.F406F,MGAT5B:NM_001199172:exon10:c.C1185T:p.F395F,MGAT5B    | NA | rs33966966  | NA |
| chr17 | 74928758 | 74928758 | C        | T      | exonic       | MGAT5B    | synonymous SNV    | :p.F452F,MGAT5B:NM_001199172:exon11:c.C1323T:p.F441F,MGAT5E   | NA | rs79286496  | NA |
| chr17 | 75494705 | 75494705 | A        | G      | exonic       | 9-Sep     | nonsynonymous SNV | :p.M569V,SEPT9:NM_001113494:exon11:c.A1234G:p.M412V,SEPT9:M   | NA | rs2627223   | NA |
| chr17 | 75494746 | 75494746 | A        | G      | UTR3         | 9-Sep     | NA                | NA                                                            | NA | rs1059485   | NA |
| chr17 | 75494761 | 75494761 | G        | C      | UTR3         | 9-Sep     | NA                | NA                                                            | NA | NA          | NA |
| chr17 | 76102136 | 76102136 | -        | A      | UTR3         | TNRC6C    | NA                | NA                                                            | NA | NA          | NA |
| chr17 | 76102618 | 76102618 | C        | -      | UTR3         | TNRC6C    | NA                | NA                                                            | NA | NA          | NA |
| chr17 | 76102966 | 76102966 | A        | -      | UTR3         | TNRC6C    | NA                | NA                                                            | NA | rs72217904  | NA |
| chr17 | 76497920 | 76497920 | C        | A      | exonic       | DNAH17    | nonsynonymous SNV | DNAH17:NM_173628:exon34:c.G5226T:p.M1742I                     | NA | rs690844    | NA |
| chr17 | 76525759 | 76525759 | G        | C      | exonic       | DNAH17    | nonsynonymous SNV | DNAH17:NM_173628:exon22:c.C3302G:p.A1101G                     | NA | rs61741523  | NA |
| chr17 | 76670610 | 76670610 | T        | G      | UTR3         | CYTH1     | NA                | NA                                                            | NA | NA          | NA |
| chr17 | 76670626 | 76670626 | T        | C      | UTR3         | CYTH1     | NA                | NA                                                            | NA | NA          | NA |
| chr17 | 76993546 | 76993546 | A        | G      | exonic       | CANT1     | synonymous SNV    | C:p.A53A,CANT1:NM_001159773:exon3:c.T159C:p.A53A,CANT1:NM_(   | NA | rs8077024   | NA |
| chr17 | 77807074 | 77807074 | T        | -      | UTR3         | CBX4      | NA                | NA                                                            | NA | rs11350225  | NA |
| chr17 | 79083194 | 79083196 | AAG      | -      | UTR3         | BAIAP2    | NA                | NA                                                            | NA | NA          | NA |
| chr17 | 79140505 | 79140505 | C        | G      | ncRNA_exonic | AATK-AS1  | NA                | NA                                                            | NA | rs12946891  | NA |
| chr17 | 79612161 | 79612161 | C        | T      | exonic       | TSPAN10   | unknown           | UNKNOWN                                                       | NA | rs6565616   | NA |
| chr17 | 79615604 | 79615604 | A        | C      | UTR3         | TSPAN10   | NA                | NA                                                            | NA | NA          | NA |
| chr17 | 79878961 | 79878961 | T        | G      | UTR3         | MAFG      | NA                | NA                                                            | NA | NA          | NA |
| chr17 | 79879436 | 79879436 | T        | -      | UTR3         | MAFG      | NA                | NA                                                            | NA | NA          | NA |
| chr17 | 79888377 | 79888377 | A        | -      | ncRNA_exonic | MAFG-AS1  | NA                | NA                                                            | NA | NA          | NA |
| chr17 | 80086386 | 80086386 | C        | T      | exonic       | CCDC57    | nonsynonymous SNV | CCDC57:NM_198082:exon15:c.G2329A:p.A777T                      | NA | rs7406162   | NA |
| chr17 | 80086389 | 80086389 | C        | T      | exonic       | CCDC57    | nonsynonymous SNV | CCDC57:NM_198082:exon15:c.G2326A:p.D776N                      | NA | rs7406163   | NA |
| chr17 | 80279412 | 80279412 | T        | A      | UTR3         | SECTM1    | NA                | NA                                                            | NA | rs1132115   | NA |
| chr17 | 80279428 | 80279428 | G        | A      | UTR3         | SECTM1    | NA                | NA                                                            | NA | rs1132114   | NA |
| chr17 | 80561596 | 80561599 | TTTT     | -      | UTR3         | FOXK2     | NA                | NA                                                            | NA | NA          | NA |
| chr17 | 81177461 | 81177461 | A        | G      | ncRNA_exonic | FLJ43681  | NA                | NA                                                            | NA | rs3897846   | NA |
| chr18 | 319513   | 319514   | AA       | -      | UTR3         | COLEC12   | NA                | NA                                                            | NA | NA          | NA |
| chr18 | 334742   | 334742   | C        | T      | exonic       | COLEC12   | nonsynonymous SNV | COLEC12:NM_130386:exon6:c.G1816A:p.G606S                      | NA | rs2305027   | D  |
| chr18 | 2943456  | 2943456  | -        | TGTGTT | ncRNA_exonic | LOC727896 | NA                | NA                                                            | NA | NA          | NA |
| chr18 | 3168816  | 3168816  | G        | A      | exonic       | MYOM1     | synonymous SNV    | _003803:exon9:c.C1338T:p.N446N,MYOM1:NM_019856:exon9:c.C13:   | NA | rs2230167   | NA |
| chr18 | 5244962  | 5244962  | -        | TG     | ncRNA_exonic | LINC00667 | NA                | NA                                                            | NA | rs202003428 | NA |
| chr18 | 5244995  | 5244995  | T        | C      | ncRNA_exonic | LINC00667 | NA                | NA                                                            | NA | rs15920     | NA |
| chr18 | 6943348  | 6943348  | G        | T      | exonic       | LAMA1     | synonymous SNV    | LAMA1:NM_005559:exon62:c.C8898A:p.P2966P                      | NA | NA          | NA |

|       |          |          |          |       |                |           |                   |                                                               |                                 |             |    |
|-------|----------|----------|----------|-------|----------------|-----------|-------------------|---------------------------------------------------------------|---------------------------------|-------------|----|
| chr18 | 6986227  | 6986227  | G        | A     | exonic         | LAMA1     | nonsynonymous SNV | LAMA1:NM_005559:exon37:c.C5288T:p.A1763V                      | NA                              | rs12607841  | B  |
| chr18 | 8069868  | 8069868  | C        | T     | exonic         | PTPRM     | synonymous SNV    | J01105244:exon8:c.C1317T:p.N439N,PTPRM:NM_002845:exon8:c.C13  | NA                              | rs2230601   | NA |
| chr18 | 8387219  | 8387219  | G        | C     | exonic         | PTPRM     | synonymous SNV    | 2845:exon29:c.G4155C:p.T1385T,PTPRM:NM_001105244:exon31:c.G4  | NA                              | rs593950    | NA |
| chr18 | 9959719  | 9959722  | AAAA     | -     | UTR3           | VAPA      | NA                | NA                                                            | NA                              | NA          | NA |
| chr18 | 12986727 | 12986727 | T        | -     | UTR3           | SEH1L     | NA                | NA                                                            | NA                              | rs199544910 | NA |
| chr18 | 13612545 | 13612546 | CC       | -     | UTR5           | LDLRAD4   | NA                | NA                                                            | NA                              | NA          | NA |
| chr18 | 13665381 | 13665385 | AAAAA    | -     | UTR3           | FAM210A   | NA                | NA                                                            | NA                              | rs71174180  | NA |
| chr18 | 14542867 | 14542867 | C        | T     | exonic         | POTEC     | synonymous SNV    | POTEC:NM_001137671:exon1:c.G279A:p.T93T                       | NA                              | rs200779556 | NA |
| chr18 | 14779969 | 14779969 | C        | G     | exonic         | ANKRD30B  | nonsynonymous SNV | ANKRD30B:NM_001145029:exon11:c.C1431G:p.F477L                 | 1130088,COSM1130087;OCCURENCE=1 | rs9675365   | NA |
| chr18 | 20577669 | 20577669 | G        | A     | exonic         | RBBP8     | synonymous SNV    | 5A:p.K705K,RBBP8:NM_203291:exon14:c.G2115A:p.K705K,RBBP8:NM   | NA                              | rs17852769  | NA |
| chr18 | 21390368 | 21390368 | T        | C     | exonic         | LAMA3     | nonsynonymous SNV | 01127717:exon13:c.T1642C:p.C548R,LAMA3:NM_198129:exon13:c.T1  | NA                              | NA          | D  |
| chr18 | 24442392 | 24442392 | C        | A     | exonic         | AQP4      | synonymous SNV    | ∕M_004028:exon1:c.G135T:p.P45P,AQP4:NM_001650:exon2:c.G201T:  | NA                              | rs35248760  | NA |
| chr18 | 24492336 | 24492336 | -        | ACAC  | ncRNA_intronic | AQP4-AS1  | NA                | NA                                                            | NA                              | NA          | NA |
| chr18 | 24492338 | 24492338 | T        | C     | ncRNA_intronic | AQP4-AS1  | NA                | NA                                                            | NA                              | rs76675133  | NA |
| chr18 | 29649164 | 29649164 | A        | -     | UTR3           | RNF125    | NA                | NA                                                            | NA                              | rs11340446  | NA |
| chr18 | 31327378 | 31327378 | A        | -     | UTR3           | ASXL3     | NA                | NA                                                            | NA                              | NA          | NA |
| chr18 | 32826672 | 32826672 | A        | -     | UTR3           | ZNF397    | NA                | NA                                                            | NA                              | NA          | NA |
| chr18 | 32888397 | 32888397 | G        | A     | ncRNA_exonic   | ZNF271    | NA                | NA                                                            | NA                              | rs63352060  | NA |
| chr18 | 33848663 | 33848663 | -        | TACAT | UTR3           | MOCOS     | NA                | NA                                                            | NA                              | rs111317566 | NA |
| chr18 | 42644774 | 42644774 | A        | -     | UTR3           | SETBP1    | NA                | NA                                                            | NA                              | rs57937684  | NA |
| chr18 | 43331751 | 43331751 | A        | T     | UTR3           | SLC14A1   | NA                | NA                                                            | NA                              | rs544373    | NA |
| chr18 | 43844698 | 43844698 | -        | T     | UTR3           | C18orf25  | NA                | NA                                                            | NA                              | NA          | NA |
| chr18 | 44229149 | 44229149 | C        | T     | exonic         | LOXHD1    | nonsynonymous SNV | LOXHD1:NM_144612:exon2:c.G214A:p.G72R                         | NA                              | NA          | NA |
| chr18 | 47088655 | 47088655 | T        | G     | UTR5           | LIPG      | NA                | NA                                                            | NA                              | rs34474737  | NA |
| chr18 | 47349245 | 47349245 | A        | C     | UTR3           | MYO5B     | NA                | NA                                                            | NA                              | NA          | NA |
| chr18 | 47349683 | 47349683 | C        | T     | UTR3           | MYO5B     | NA                | NA                                                            | NA                              | NA          | NA |
| chr18 | 47349684 | 47349684 | C        | G     | UTR3           | MYO5B     | NA                | NA                                                            | NA                              | NA          | NA |
| chr18 | 47349692 | 47349692 | T        | G     | UTR3           | MYO5B     | NA                | NA                                                            | NA                              | NA          | NA |
| chr18 | 47350330 | 47350330 | C        | A     | UTR3           | MYO5B     | NA                | NA                                                            | NA                              | NA          | NA |
| chr18 | 47350346 | 47350346 | G        | C     | UTR3           | MYO5B     | NA                | NA                                                            | NA                              | NA          | NA |
| chr18 | 47350353 | 47350353 | C        | T     | UTR3           | MYO5B     | NA                | NA                                                            | NA                              | NA          | NA |
| chr18 | 47350357 | 47350357 | T        | A     | UTR3           | MYO5B     | NA                | NA                                                            | NA                              | NA          | NA |
| chr18 | 47350373 | 47350373 | A        | C     | UTR3           | MYO5B     | NA                | NA                                                            | NA                              | NA          | NA |
| chr18 | 47350377 | 47350377 | G        | A     | UTR3           | MYO5B     | NA                | NA                                                            | NA                              | NA          | NA |
| chr18 | 47350394 | 47350394 | A        | G     | UTR3           | MYO5B     | NA                | NA                                                            | NA                              | NA          | NA |
| chr18 | 47350395 | 47350395 | A        | G     | UTR3           | MYO5B     | NA                | NA                                                            | NA                              | NA          | NA |
| chr18 | 47350400 | 47350400 | A        | G     | UTR3           | MYO5B     | NA                | NA                                                            | NA                              | NA          | NA |
| chr18 | 47350406 | 47350406 | A        | T     | UTR3           | MYO5B     | NA                | NA                                                            | NA                              | NA          | NA |
| chr18 | 47350683 | 47350683 | C        | T     | UTR3           | MYO5B     | NA                | NA                                                            | NA                              | rs74651470  | NA |
| chr18 | 47908556 | 47908556 | G        | A     | exonic         | SKA1      | nonsynonymous SNV | ∕_001039535:exon4:c.G271A:p.V91I,SKA1:NM_145060:exon4:c.G271, | NA                              | rs6507992   | B  |
| chr18 | 48325302 | 48325302 | C        | A     | UTR3           | MRO       | NA                | NA                                                            | NA                              | rs2849256   | NA |
| chr18 | 48584791 | 48584791 | A        | C     | exonic         | SMAD4     | nonsynonymous SNV | SMAD4:NM_005359:exon7:c.A869C:p.H290P                         | NA                              | NA          | D  |
| chr18 | 48584794 | 48584794 | A        | C     | exonic         | SMAD4     | nonsynonymous SNV | SMAD4:NM_005359:exon7:c.A872C:p.H291P                         | NA                              | NA          | P  |
| chr18 | 48610371 | 48610372 | CA       | -     | UTR3           | SMAD4     | NA                | NA                                                            | NA                              | NA          | NA |
| chr18 | 48610377 | 48610388 | CGCGCACA | -     | UTR3           | SMAD4     | NA                | NA                                                            | NA                              | NA          | NA |
| chr18 | 51822710 | 51822710 | C        | T     | UTR3           | POLI      | NA                | NA                                                            | NA                              | rs518069    | NA |
| chr18 | 51887123 | 51887123 | C        | T     | exonic         | C18orf54  | synonymous SNV    | C18orf54:NM_173529:exon2:c.C181T:p.L61L                       | NA                              | rs1657904   | NA |
| chr18 | 51905870 | 51905870 | T        | -     | UTR3           | C18orf54  | NA                | NA                                                            | NA                              | NA          | NA |
| chr18 | 52890959 | 52890961 | TTT      | -     | UTR3           | TCF4      | NA                | NA                                                            | NA                              | NA          | NA |
| chr18 | 55215119 | 55215119 | T        | C     | UTR3           | FECH      | NA                | NA                                                            | NA                              | rs8090261   | NA |
| chr18 | 55216655 | 55216655 | -        | T     | UTR3           | FECH      | NA                | NA                                                            | NA                              | NA          | NA |
| chr18 | 55216771 | 55216771 | T        | G     | UTR3           | FECH      | NA                | NA                                                            | NA                              | NA          | NA |
| chr18 | 55216772 | 55216772 | T        | A     | UTR3           | FECH      | NA                | NA                                                            | NA                              | NA          | NA |
| chr18 | 55216773 | 55216773 | T        | G     | UTR3           | FECH      | NA                | NA                                                            | NA                              | NA          | NA |
| chr18 | 55862847 | 55862847 | G        | A     | UTR5           | NEDD4L    | NA                | NA                                                            | NA                              | rs1008899   | NA |
| chr18 | 56415902 | 56415902 | G        | A     | UTR3           | MALT1     | NA                | NA                                                            | NA                              | rs62093496  | NA |
| chr18 | 56962800 | 56962801 | AA       | -     | UTR3           | CPLX4     | NA                | NA                                                            | NA                              | rs61050481  | NA |
| chr18 | 56963852 | 56963852 | T        | G     | UTR3           | CPLX4     | NA                | NA                                                            | NA                              | rs17696504  | NA |
| chr18 | 59712463 | 59712463 | G        | A     | UTR3           | PIGN      | NA                | NA                                                            | NA                              | rs28375341  | NA |
| chr18 | 59780393 | 59780393 | T        | A     | exonic         | PIGN      | nonsynonymous SNV | _012327:exon15:c.A1408T:p.I470L,PIGN:NM_176787:exon16:c.A1408 | NA                              | rs3862712   | NA |
| chr18 | 59814268 | 59814268 | G        | A     | exonic         | PIGN      | synonymous SNV    | ∕_012327:exon8:c.C741T:p.H247H,PIGN:NM_176787:exon9:c.C741T:∕ | NA                              | rs9320000   | NA |
| chr18 | 60052586 | 60052586 | G        | T     | UTR3           | TNFRSF11A | NA                | NA                                                            | NA                              | NA          | NA |
| chr18 | 60052587 | 60052587 | G        | C     | UTR3           | TNFRSF11A | NA                | NA                                                            | NA                              | NA          | NA |
| chr18 | 60237388 | 60237388 | A        | G     | exonic         | ZCCHC2    | synonymous SNV    | ZCCHC2:NM_017742:exon12:c.A1899G:p.S633S                      | NA                              | rs8096750   | NA |
| chr18 | 60995589 | 60995589 | T        | -     | UTR3           | KDSR      | NA                | NA                                                            | NA                              | rs11349419  | NA |
| chr18 | 61377579 | 61377579 | A        | C     | exonic         | SERPINB1  | unknown           | UNKNOWN                                                       | NA                              | rs1395268   | NA |

|       |          |          |      |          |              |             |                   |                                                                                            |                                 |             |    |
|-------|----------|----------|------|----------|--------------|-------------|-------------------|--------------------------------------------------------------------------------------------|---------------------------------|-------------|----|
| chr18 | 67509199 | 67509199 | -    | GTGTGTGT | UTR3         | DOK6        | NA                | NA                                                                                         | NA                              | rs143503551 | NA |
| chr18 | 67515008 | 67515008 | -    | T        | UTR3         | DOK6        | NA                | NA                                                                                         | NA                              | NA          | NA |
| chr18 | 72168608 | 72168608 | G    | A        | exonic       | CNDP2       | synonymous SNV    | 1_001168499:exon2:c.G105A:p.P35P,CNDP2:NM_018235:exon3:c.G10=COSM148444;OCCURENCE=1(stomac | rs2303463                       | NA          | NA |
| chr18 | 72234635 | 72234635 | C    | T        | exonic       | CNDP1       | synonymous SNV    | CNDP1:NM_032649:exon6:c.C723T:p.Y241Y                                                      | rs12960862                      | NA          | NA |
| chr18 | 72260399 | 72260399 | G    | A        | ncRNA_exonic | LOC400657   | NA                | NA                                                                                         | NA                              | rs10782060  | NA |
| chr18 | 72593032 | 72593032 | C    | G        | exonic       | ZNF407      | synonymous SNV    | 1146189:exon5:c.C5085G;p.G1695G,ZNF407:NM_017757:exon5:c.C5(                               | NA                              | NA          | NA |
| chr18 | 72922851 | 72922851 | -    | GG       | UTR5         | TSHZ1       | NA                | NA                                                                                         | NA                              | NA          | NA |
| chr18 | 74728109 | 74728109 | -    | TT       | UTR3         | MBP         | NA                | NA                                                                                         | NA                              | NA          | NA |
| chr18 | 77473127 | 77473127 | C    | T        | exonic       | CTDP1       | nonsynonymous SNV | 52T:p.T221M,CTDP1:NM_004715:exon7:c.C1019T:p.T340M,CTDP1:NM                                | rs2279103                       | B           | NA |
| chr18 | 77916875 | 77916875 | T    | -        | ncRNA_UTR3   | PAR6G       | NA                | NA                                                                                         | NA                              | rs145797175 | NA |
| chr18 | 77917479 | 77917479 | G    | A        | ncRNA_UTR3   | PAR6G       | NA                | NA                                                                                         | NA                              | rs62101564  | NA |
| chr18 | 77936214 | 77936214 | G    | A        | ncRNA_exonic | PAR6G-AS1   | NA                | NA                                                                                         | NA                              | rs11660391  | NA |
| chr19 | 199636   | 199636   | G    | T        | ncRNA_exonic | FLJ45445    | NA                | NA                                                                                         | NA                              | rs4897924   | NA |
| chr19 | 199880   | 199880   | T    | G        | ncRNA_exonic | FLJ45445    | NA                | NA                                                                                         | ID=COSN394552;OCCURENCE=1(lung) | rs11878357  | NA |
| chr19 | 536265   | 536265   | T    | C        | exonic       | CDC34       | nonsynonymous SNV | CDC34:NM_004359:exon3:c.T287C:p.I96T                                                       | NA                              | NA          | D  |
| chr19 | 536268   | 536268   | T    | C        | exonic       | CDC34       | nonsynonymous SNV | CDC34:NM_004359:exon3:c.T290C:p.L97P                                                       | NA                              | NA          | D  |
| chr19 | 583453   | 583453   | A    | C        | UTR3         | BSG         | NA                | NA                                                                                         | NA                              | NA          | NA |
| chr19 | 682259   | 682259   | A    | G        | UTR3         | FSTL3       | NA                | NA                                                                                         | NA                              | NA          | NA |
| chr19 | 863548   | 863548   | G    | T        | UTR3         | CFD         | NA                | NA                                                                                         | NA                              | NA          | NA |
| chr19 | 1008683  | 1008683  | G    | A        | exonic       | GRIN3B      | nonsynonymous SNV | GRIN3B:NM_138690:exon7:c.G2533A:p.A845T                                                    | rs2285906                       | P           | NA |
| chr19 | 1037969  | 1037971  | TTT  | -        | UTR3         | CNN2        | NA                | NA                                                                                         | NA                              | rs150855033 | NA |
| chr19 | 1047161  | 1047161  | A    | G        | exonic       | ABCA7       | synonymous SNV    | ABCA7:NM_019112:exon15:c.A1851G:p.G617G                                                    | rs3752237                       | NA          | NA |
| chr19 | 1049269  | 1049269  | G    | A        | exonic       | ABCA7       | synonymous SNV    | ABCA7:NM_019112:exon18:c.G2385A:p.L795L                                                    | rs4147914                       | NA          | NA |
| chr19 | 1398611  | 1398611  | T    | -        | UTR3         | GAMT        | NA                | NA                                                                                         | NA                              | rs61684562  | NA |
| chr19 | 1472595  | 1472595  | A    | C        | UTR3         | APC2        | NA                | NA                                                                                         | NA                              | NA          | NA |
| chr19 | 1554912  | 1554912  | -    | A        | UTR3         | MEX3D       | NA                | NA                                                                                         | NA                              | NA          | NA |
| chr19 | 1954126  | 1954126  | -    | A        | ncRNA_exonic | CSNK1G2-AS1 | NA                | NA                                                                                         | NA                              | rs34622118  | NA |
| chr19 | 1954128  | 1954128  | T    | C        | ncRNA_exonic | CSNK1G2-AS1 | NA                | NA                                                                                         | NA                              | rs62129474  | NA |
| chr19 | 2072038  | 2072038  | T    | C        | UTR3         | MOB3A       | NA                | NA                                                                                         | NA                              | rs8102231   | NA |
| chr19 | 2072746  | 2072746  | A    | -        | UTR3         | MOB3A       | NA                | NA                                                                                         | NA                              | NA          | NA |
| chr19 | 2226847  | 2226847  | G    | T        | exonic       | DOT1L       | nonsynonymous SNV | DOT1L:NM_032482:exon27:c.G4327T:p.G1443C                                                   | rs113842228                     | D           | NA |
| chr19 | 3198841  | 3198841  | G    | C        | exonic       | NCLN        | nonsynonymous SNV | NCLN:NM_020170:exon5:c.G642C:p.E214D                                                       | rs11671067                      | B           | NA |
| chr19 | 3593004  | 3593004  | A    | G        | UTR3         | GIPC3       | NA                | NA                                                                                         | NA                              | rs17433775  | NA |
| chr19 | 3767265  | 3767265  | C    | T        | exonic       | MRPL54      | synonymous SNV    | MRPL54:NM_172251:exon3:c.C291T:p.F97F                                                      | rs7239                          | NA          | NA |
| chr19 | 3823292  | 3823292  | G    | A        | exonic       | ZFR2        | synonymous SNV    | ZFR2:NM_015174:exon8:c.C1323T:p.P441P                                                      | rs61744821                      | NA          | NA |
| chr19 | 4045564  | 4045564  | C    | A        | UTR3         | ZBTB7A      | NA                | NA                                                                                         | NA                              | NA          | NA |
| chr19 | 4045639  | 4045639  | A    | C        | UTR3         | ZBTB7A      | NA                | NA                                                                                         | NA                              | NA          | NA |
| chr19 | 4046431  | 4046432  | TT   | -        | UTR3         | ZBTB7A      | NA                | NA                                                                                         | NA                              | NA          | NA |
| chr19 | 4153655  | 4153655  | G    | T        | UTR5         | CREB3L3     | NA                | NA                                                                                         | NA                              | NA          | NA |
| chr19 | 4280186  | 4280186  | C    | T        | exonic       | SHD         | synonymous SNV    | SHD:NM_020209:exon1:c.C126T:p.F42F                                                         | rs10419363                      | NA          | NA |
| chr19 | 4442999  | 4442999  | T    | G        | exonic       | CHAF1A      | nonsynonymous SNV | CHAF1A:NM_005483:exon15:c.T2848G:p.S950A                                                   | rs243383                        | B           | NA |
| chr19 | 4502937  | 4502937  | A    | C        | UTR3         | PLIN4       | NA                | NA                                                                                         | NA                              | NA          | NA |
| chr19 | 4511680  | 4511680  | A    | G        | exonic       | PLIN4       | synonymous SNV    | PLIN4:NM_001080400:exon3:c.T2250C:p.D750D                                                  | NA                              | NA          | NA |
| chr19 | 4512877  | 4512877  | G    | A        | exonic       | PLIN4       | synonymous SNV    | PLIN4:NM_001080400:exon3:c.C1053T:p.G351G                                                  | rs61730751                      | NA          | NA |
| chr19 | 4513006  | 4513006  | G    | A        | exonic       | PLIN4       | synonymous SNV    | PLIN4:NM_001080400:exon3:c.C924T:p.G308G                                                   | rs73920831                      | NA          | NA |
| chr19 | 4675418  | 4675418  | A    | G        | UTR3         | DPP9        | NA                | NA                                                                                         | NA                              | NA          | NA |
| chr19 | 4867690  | 4867690  | A    | G        | UTR5         | PLIN3       | NA                | NA                                                                                         | NA                              | rs262559    | NA |
| chr19 | 5153606  | 5153606  | G    | A        | UTR3         | KDM4B       | NA                | NA                                                                                         | NA                              | rs11514     | NA |
| chr19 | 5206072  | 5206072  | A    | -        | UTR3         | PTPRS       | NA                | NA                                                                                         | NA                              | NA          | NA |
| chr19 | 5206246  | 5206249  | TTTG | -        | UTR3         | PTPRS       | NA                | NA                                                                                         | NA                              | rs138275722 | NA |
| chr19 | 5206261  | 5206261  | -    | A        | UTR3         | PTPRS       | NA                | NA                                                                                         | NA                              | rs199687996 | NA |
| chr19 | 5206276  | 5206276  | A    | -        | UTR3         | PTPRS       | NA                | NA                                                                                         | NA                              | rs141036801 | NA |
| chr19 | 5587299  | 5587299  | T    | G        | exonic       | SAFB2       | synonymous SNV    | SAFB2:NM_014649:exon21:c.A2817C:p.P939P                                                    | NA                              | NA          | NA |
| chr19 | 5587303  | 5587303  | T    | G        | exonic       | SAFB2       | nonsynonymous SNV | SAFB2:NM_014649:exon21:c.A2813C:p.H938P                                                    | NA                              | NA          | NA |
| chr19 | 5622905  | 5622905  | -    | C        | UTR5         | SAFB2       | NA                | NA                                                                                         | NA                              | NA          | NA |
| chr19 | 5910015  | 5910015  | -    | G        | UTR3         | VMAC        | NA                | NA                                                                                         | NA                              | rs76336657  | NA |
| chr19 | 6312290  | 6312290  | T    | C        | exonic       | ACER1       | nonsynonymous SNV | ACER1:NM_133492:exon3:c.A220G:p.M74V                                                       | rs72981971                      | D           | NA |
| chr19 | 6535372  | 6535373  | GG   | -        | UTR3         | TNFSF9      | NA                | NA                                                                                         | NA                              | NA          | NA |
| chr19 | 6718387  | 6718387  | G    | C        | exonic       | C3          | nonsynonymous SNV | C3:NM_000064:exon3:c.C304G:p.R102G                                                         | rs2230199                       | B           | NA |
| chr19 | 7051376  | 7051376  | G    | A        | exonic       | MBD3L2      | nonsynonymous SNV | MBD3L2:NM_144614:exon2:c.G370A:p.G124S                                                     | rs200081225                     | B           | NA |
| chr19 | 7056553  | 7056553  | C    | T        | exonic       | MBD3L3      | nonsynonymous SNV | MBD3L3:NM_001164425:exon2:c.G407A:p.R136H                                                  | rs199680919                     | NA          | NA |
| chr19 | 7086367  | 7086367  | C    | T        | UTR3         | ZNF557      | NA                | NA                                                                                         | NA                              | NA          | NA |
| chr19 | 7087549  | 7087549  | A    | -        | UTR3         | ZNF557      | NA                | NA                                                                                         | NA                              | rs11287183  | NA |
| chr19 | 7114059  | 7114060  | AA   | -        | UTR3         | INSR        | NA                | NA                                                                                         | NA                              | NA          | NA |
| chr19 | 7116712  | 7116713  | AA   | -        | UTR3         | INSR        | NA                | NA                                                                                         | NA                              | rs71177157  | NA |
| chr19 | 7116733  | 7116733  | G    | A        | UTR3         | INSR        | NA                | NA                                                                                         | NA                              | NA          | NA |

|       |          |          |      |      |              |                              |                      |                                                                                              |            |             |    |
|-------|----------|----------|------|------|--------------|------------------------------|----------------------|----------------------------------------------------------------------------------------------|------------|-------------|----|
| chr19 | 7528734  | 7528734  | A    | G    | exonic       | ARHGEF18                     | nonsynonymous SNV    | 1130955:exon12:c.A2102G:p.Q701R,ARHGEF18:NM_015318:exon13:c.                                 | NA         | rs2287918   | B  |
| chr19 | 7536477  | 7536477  | C    | G    | UTR3         | ARHGEF18                     | NA                   | NA                                                                                           | NA         | NA          | NA |
| chr19 | 7536507  | 7536507  | T    | G    | UTR3         | ARHGEF18                     | NA                   | NA                                                                                           | NA         | NA          | NA |
| chr19 | 7547074  | 7547074  | A    | C    | exonic       | PEX11G                       | nonsynonymous SNV    | _001270539:exon3:c.T273G:p.C91W,PEX11G:NM_080662:exon3:c.T2:                                 | NA         | rs2303146   | B  |
| chr19 | 7571030  | 7571030  | T    | A    | exonic       | C19orf45                     | nonsynonymous SNV    | C19orf45:NM_198534:exon7:c.T1186A:p.Y396N                                                    | NA         | rs3826736   | B  |
| chr19 | 7744076  | 7744076  | C    | -    | UTR3         | C19orf59                     | NA                   | NA                                                                                           | NA         | NA          | NA |
| chr19 | 7855113  | 7855114  | GT   | -    | ncRNA_exonic | CLEC4GP1                     | NA                   | NA                                                                                           | NA         | NA          | NA |
| chr19 | 7977929  | 7977929  | C    | -    | UTR3         | MAP2K7                       | NA                   | NA                                                                                           | NA         | NA          | NA |
| chr19 | 7977931  | 7977933  | CTC  | -    | UTR3         | MAP2K7                       | NA                   | NA                                                                                           | NA         | NA          | NA |
| chr19 | 7978407  | 7978407  | G    | A    | UTR3         | MAP2K7                       | NA                   | NA                                                                                           | NA         | rs4804835   | NA |
| chr19 | 7989578  | 7989578  | G    | T    | UTR3         | CTXN1                        | NA                   | NA                                                                                           | NA         | NA          | NA |
| chr19 | 8176569  | 8176569  | G    | A    | exonic       | FBN3                         | synonymous SNV       | FBN3:NM_032447:exon31:c.C4047T:p.C1349C                                                      | NA         | rs35306870  | NA |
| chr19 | 9878987  | 9878987  | G    | -    | UTR5         | ZNF846                       | NA                   | NA                                                                                           | NA         | rs147535386 | NA |
| chr19 | 10089262 | 10089262 | G    | A    | exonic       | COL5A3                       | synonymous SNV       | COL5A3:NM_015719:exon41:c.C3006T:p.P1002P                                                    | NA         | rs12610207  | NA |
| chr19 | 10179657 | 10179657 | G    | A    | ncRNA_exonic | C3P1                         | NA                   | NA                                                                                           | NA         | rs897803    | NA |
| chr19 | 10267077 | 10267077 | T    | C    | exonic       | DNMT1                        | synonymous SNV       | 101379:exon17:c.A1341G:p.P447P,DNMT1:NM_001130823:exon18:c.A:                                | NA         | rs2228611   | NA |
| chr19 | 10397238 | 10397238 | C    | T    | UTR3         | ICAM1                        | NA                   | NA                                                                                           | NA         | rs281437    | NA |
| chr19 | 10449358 | 10449358 | T    | C    | exonic       | ICAM3                        | nonsynonymous SNV    | ICAM3:NM_002162:exon2:c.A343G:p.R115G                                                        | NA         | rs7258015   | B  |
| chr19 | 10556897 | 10556897 | C    | T    | exonic       | PDE4A                        | synonymous SNV       | 1_001111308:exon2:c.C246T:p.F82F,PDE4A:NM_001111309:exon2:c.C                                | NA         | rs118115488 | NA |
| chr19 | 10579165 | 10579165 | G    | C    | UTR3         | PDE4A                        | NA                   | NA                                                                                           | NA         | NA          | NA |
| chr19 | 10664256 | 10664256 | -    | TAA  | UTR3         | KRI1                         | NA                   | NA                                                                                           | NA         | rs201847069 | NA |
| chr19 | 11406839 | 11406839 | C    | G    | UTR5         | TSPAN16                      | NA                   | NA                                                                                           | NA         | rs453766    | NA |
| chr19 | 11562302 | 11562302 | G    | T    | UTR3         | ELAVL3                       | NA                   | NA                                                                                           | NA         | NA          | NA |
| chr19 | 11564606 | 11564606 | A    | C    | UTR3         | ELAVL3                       | NA                   | NA                                                                                           | NA         | NA          | NA |
| chr19 | 11708361 | 11708361 | C    | T    | UTR5         | ZNF627                       | NA                   | NA                                                                                           | NA         | rs11551815  | NA |
| chr19 | 12091196 | 12091196 | -    | A    | UTR3         | ZNF763                       | NA                   | NA                                                                                           | NA         | NA          | NA |
| chr19 | 12405552 | 12405552 | T    | C    | UTR5         | ZNF44                        | NA                   | NA                                                                                           | NA         | rs386901    | NA |
| chr19 | 12428307 | 12428307 | T    | G    | UTR3         | ZNF563                       | NA                   | NA                                                                                           | NA         | rs78023129  | NA |
| chr19 | 12572300 | 12572300 | G    | A    | UTR3         | ZNF709                       | NA                   | NA                                                                                           | NA         | rs4804194   | NA |
| chr19 | 12574741 | 12574741 | A    | -    | UTR3         | ZNF709                       | NA                   | NA                                                                                           | NA         | NA          | NA |
| chr19 | 12774537 | 12774537 | G    | A    | exonic       | MAN2B1                       | nonsynonymous SNV    | 1_000528:exon5:c.C743T:p.P248L,MAN2B1:NM_001173498:exon5:c.C:                                | NA         | rs117843968 | D  |
| chr19 | 12958697 | 12958697 | T    | C    | exonic       | MAST1                        | synonymous SNV       | MAST1:NM_014975:exon7:c.T600C:p.F200F                                                        | NA         | rs2290688   | NA |
| chr19 | 12996740 | 12996740 | A    | G    | exonic       | KLF1                         | nonsynonymous SNV    | KLF1:NM_006563:exon2:c.T304C:p.S102P                                                         | NA         | rs2072597   | B  |
| chr19 | 13054781 | 13054781 | G    | T    | UTR3         | CALR                         | NA                   | NA                                                                                           | NA         | rs1049481   | NA |
| chr19 | 13942986 | 13942986 | A    | T    | UTR3         | ZSWIM4                       | NA                   | NA                                                                                           | NA         | NA          | NA |
| chr19 | 13943034 | 13943034 | G    | T    | UTR3         | ZSWIM4                       | NA                   | NA                                                                                           | NA         | NA          | NA |
| chr19 | 14627776 | 14627776 | A    | G    | exonic       | DNAJB1                       | synonymous SNV       | DNAJB1:NM_006145:exon2:c.T294C:p.P98P                                                        | NA         | NA          | NA |
| chr19 | 14627800 | 14627800 | G    | A    | exonic       | DNAJB1                       | synonymous SNV       | DNAJB1:NM_006145:exon2:c.C270T:p.F90F                                                        | NA         | NA          | NA |
| chr19 | 14627816 | 14627816 | -    | C    | exonic       | DNAJB1                       | frameshift insertion | DNAJB1:NM_006145:exon2:c.254_255insG:p.A85fs                                                 | NA         | NA          | NA |
| chr19 | 14627818 | 14627818 | A    | C    | exonic       | DNAJB1                       | synonymous SNV       | DNAJB1:NM_006145:exon2:c.T252G:p.G84G                                                        | NA         | NA          | NA |
| chr19 | 14627821 | 14627821 | A    | C    | exonic       | DNAJB1                       | synonymous SNV       | DNAJB1:NM_006145:exon2:c.T249G:p.G83G                                                        | NA         | NA          | NA |
| chr19 | 14682804 | 14682804 | G    | C    | exonic       | NDUFB7                       | synonymous SNV       | NDUFB7:NM_004146:exon1:c.C9G:p.A3A                                                           | NA         | rs9543      | NA |
| chr19 | 14769339 | 14769339 | C    | G    | exonic       | EMR3                         | nonsynonymous SNV    | EMR3:NM_032571:exon5:c.G379C:p.E127Q                                                         | NA         | rs4606855   | B  |
| chr19 | 14862430 | 14862430 | C    | G    | exonic       | EMR2                         | nonsynonymous SNV    | 101271052:exon14:c.G1668C:p.L556F,EMR2:NM_013447:exon16:c.G1&                                | NA         | rs2524383   | B  |
| chr19 | 15292605 | 15292605 | G    | T    | exonic       | NOTCH3                       | stopgain SNV         | NOTCH3:NM_000435:exon17:c.C2574A:p.C858X                                                     | NA         | NA          | NA |
| chr19 | 15575174 | 15575174 | G    | -    | UTR5         | RASAL3                       | NA                   | NA                                                                                           | NA         | NA          | NA |
| chr19 | 15996820 | 15996820 | G    | A    | exonic       | CYP4F2                       | synonymous SNV       | CYP4F2:NM_001082:exon9:c.C1029T:p.H343H                                                      | NA         | rs2074900   | NA |
| chr19 | 16023492 | 16023492 | T    | A    | UTR3         | CYP4F11                      | NA                   | NA                                                                                           | NA         | NA          | NA |
| chr19 | 16040292 | 16040292 | A    | G    | exonic       | CYP4F11                      | synonymous SNV       | v1_021187:exon2:c.T318C:p.I106I,CYP4F11:NM_001128932:exon3:c.T3                              | NA         | rs3765070   | NA |
| chr19 | 16662564 | 16662565 | TT   | -    | UTR3         | SLC35E1                      | NA                   | NA                                                                                           | NA         | NA          | NA |
| chr19 | 16902167 | 16902167 | G    | T    | exonic       | NWD1                         | nonsynonymous SNV    | NWD1:NM_001007525:exon14:c.G2947T:p.A983S                                                    | NA         | NA          | B  |
| chr19 | 17434120 | 17434120 | -    | TGTG | UTR3         | ANO8                         | NA                   | NA                                                                                           | NA         | NA          | NA |
| chr19 | 17660300 | 17660300 | G    | A    | exonic       | FAM129C                      | nonsynonymous SNV    | 101098524:exon15:c.G1807A:p.G603S,FAM129C:NM_173544:exon15:c.)=COSM148530;OCCURENCE=1(stomac | rs11666267 | B           |    |
| chr19 | 17692719 | 17692719 | T    | -    | UTR3         | COLGALT1                     | NA                   | NA                                                                                           | NA         | rs34244232  | NA |
| chr19 | 17716794 | 17716794 | C    | T    | UTR3         | UNC13A                       | NA                   | NA                                                                                           | NA         | rs12974304  | NA |
| chr19 | 17932190 | 17932190 | T    | C    | exonic       | INSL3                        | synonymous SNV       | v1_001265587:exon1:c.A126G:p.L42L,INSL3:NM_005543:exon1:c.A126                               | NA         | rs1047233   | NA |
| chr19 | 18054643 | 18054643 | C    | T    | UTR3         | CCDC124                      | NA                   | NA                                                                                           | NA         | rs1052564   | NA |
| chr19 | 18260786 | 18260789 | TTTT | -    | UTR3         | MAST3                        | NA                   | NA                                                                                           | NA         | rs71872759  | NA |
| chr19 | 18260796 | 18260797 | TT   | -    | UTR3         | MAST3                        | NA                   | NA                                                                                           | NA         | NA          | NA |
| chr19 | 18479249 | 18479252 | AAAA | -    | UTR3         | PGPEP1                       | NA                   | NA                                                                                           | NA         | NA          | NA |
| chr19 | 18499815 | 18499815 | G    | C    | UTR3         | GDF15                        | NA                   | NA                                                                                           | NA         | rs1054564   | NA |
| chr19 | 18499858 | 18499858 | T    | C    | UTR3         | GDF15                        | NA                   | NA                                                                                           | NA         | rs1054221   | NA |
| chr19 | 19023853 | 19023853 | T    | C    | exonic       | COPE                         | synonymous SNV       | A129G:p.L43L,COPE:NM_199442:exon2:c.A129G:p.L43L,COPE:NM_19=COSM1178458;OCCURENCE=1(prostat  | rs3177137  | NA          |    |
| chr19 | 19618060 | 19618060 | -    | A    | UTR3         | GATAD2A                      | NA                   | NA                                                                                           | NA         | rs35542121  | NA |
| chr19 | 20115647 | 20115647 | -    | AC   | UTR3         | ZNF682                       | NA                   | NA                                                                                           | NA         | rs201489153 | NA |
| chr19 | 20575357 | 20575357 | T    | C    | intergenic   | '0-1(dist=65194),ZNF826P(dis | NA                   | NA                                                                                           | NA         | rs10425673  | NA |

|       |          |          |        |      |              |           |                   |                                                                        |                                   |             |    |
|-------|----------|----------|--------|------|--------------|-----------|-------------------|------------------------------------------------------------------------|-----------------------------------|-------------|----|
| chr19 | 20722725 | 20722725 | A      | G    | UTR3         | ZNF737    | NA                | NA                                                                     | NA                                | NA          | NA |
| chr19 | 20722726 | 20722726 | C      | T    | UTR3         | ZNF737    | NA                | NA                                                                     | NA                                | rs73924681  | NA |
| chr19 | 20722727 | 20722727 | T      | A    | UTR3         | ZNF737    | NA                | NA                                                                     | NA                                | NA          | NA |
| chr19 | 20722743 | 20722743 | T      | A    | UTR3         | ZNF737    | NA                | NA                                                                     | NA                                | rs73924682  | NA |
| chr19 | 20722787 | 20722787 | A      | T    | UTR3         | ZNF737    | NA                | NA                                                                     | NA                                | rs138165402 | NA |
| chr19 | 21306251 | 21306251 | G      | A    | UTR3         | ZNF714    | NA                | NA                                                                     | NA                                | rs10413226  | NA |
| chr19 | 21368412 | 21368412 | A      | G    | UTR3         | ZNF431    | NA                | NA                                                                     | NA                                | rs113635752 | NA |
| chr19 | 21561326 | 21561327 | CA     | -    | ncRNA_exonic | ZNF738    | NA                | NA                                                                     | NA                                | NA          | NA |
| chr19 | 21561509 | 21561511 | CTC    | -    | ncRNA_exonic | ZNF738    | NA                | NA                                                                     | NA                                | rs145776873 | NA |
| chr19 | 21561863 | 21561863 | T      | -    | ncRNA_exonic | ZNF738    | NA                | NA                                                                     | NA                                | rs35081700  | NA |
| chr19 | 21564868 | 21564868 | C      | T    | ncRNA_exonic | ZNF738    | NA                | NA                                                                     | NA                                | NA          | NA |
| chr19 | 21564868 | 21564868 | -      | T    | ncRNA_exonic | ZNF738    | NA                | NA                                                                     | NA                                | NA          | NA |
| chr19 | 21565050 | 21565050 | -      | T    | ncRNA_exonic | ZNF738    | NA                | NA                                                                     | NA                                | NA          | NA |
| chr19 | 21566249 | 21566249 | T      | A    | ncRNA_exonic | ZNF738    | NA                | NA                                                                     | NA                                | NA          | NA |
| chr19 | 21590636 | 21590636 | C      | T    | UTR3         | ZNF493    | NA                | NA                                                                     | NA                                | rs2359144   | NA |
| chr19 | 22156855 | 22156855 | G      | A    | exonic       | ZNF208    | synonymous SNV    | ZNF208:NM_007153:exon4:c.C981T:p.T327T                                 | NA                                | rs200969060 | NA |
| chr19 | 22156858 | 22156858 | T      | C    | exonic       | ZNF208    | synonymous SNV    | ZNF208:NM_007153:exon4:c.A978G:p.S326S                                 | NA                                | rs200113618 | NA |
| chr19 | 22156863 | 22156863 | C      | A    | exonic       | ZNF208    | nonsynonymous SNV | ZNF208:NM_007153:exon4:c.G973T:p.V325F                                 | ID=COSM230374;OCCURENCE=1(NS)     | rs202200782 | NA |
| chr19 | 22363413 | 22363413 | C      | T    | exonic       | ZNF676    | nonsynonymous SNV | ZNF676:NM_001001411:exon3:c.G1106A:p.G369E                             | NA                                | rs75690456  | B  |
| chr19 | 22363826 | 22363826 | G      | C    | exonic       | ZNF676    | synonymous SNV    | ZNF676:NM_001001411:exon3:c.C693G:p.G231G                              | NA                                | rs7252593   | NA |
| chr19 | 22363869 | 22363869 | A      | C    | exonic       | ZNF676    | nonsynonymous SNV | ZNF676:NM_001001411:exon3:c.T650G:p.V217G                              | NA                                | NA          | B  |
| chr19 | 22363893 | 22363893 | A      | G    | exonic       | ZNF676    | nonsynonymous SNV | ZNF676:NM_001001411:exon3:c.T626C:p.F209S                              | NA                                | NA          | B  |
| chr19 | 22363896 | 22363896 | T      | C    | exonic       | ZNF676    | nonsynonymous SNV | ZNF676:NM_001001411:exon3:c.A623G:p.K208R                              | NA                                | NA          | B  |
| chr19 | 22375868 | 22375868 | C      | T    | exonic       | ZNF676    | nonsynonymous SNV | ZNF676:NM_001001411:exon2:c.G80A:p.G27E                                | NA                                | rs8104929   | B  |
| chr19 | 22379587 | 22379587 | G      | T    | UTR5         | ZNF676    | NA                | NA                                                                     | NA                                | rs2360001   | NA |
| chr19 | 22848991 | 22848991 | T      | -    | UTR3         | ZNF492    | NA                | NA                                                                     | NA                                | rs202104125 | NA |
| chr19 | 23556605 | 23556605 | A      | G    | exonic       | ZNF91     | synonymous SNV    | ZNF91:NM_003430:exon3:c.T192C:p.Y64Y                                   | OSM288088;OCCURENCE=1(large_intes | rs34740519  | NA |
| chr19 | 31766336 | 31766336 | T      | -    | UTR3         | TSHZ3     | NA                | NA                                                                     | NA                                | rs57983390  | NA |
| chr19 | 33088072 | 33088072 | -      | ATCA | UTR3         | ANKRD27   | NA                | NA                                                                     | NA                                | rs143829091 | NA |
| chr19 | 33169172 | 33169172 | -      | C    | UTR3         | RGS9BP    | NA                | NA                                                                     | NA                                | NA          | NA |
| chr19 | 33467620 | 33467620 | T      | C    | UTR3         | C19orf40  | NA                | NA                                                                     | NA                                | rs7247715   | NA |
| chr19 | 34718608 | 34718608 | T      | -    | UTR3         | LSM14A    | NA                | NA                                                                     | NA                                | NA          | NA |
| chr19 | 34718735 | 34718735 | A      | G    | UTR3         | LSM14A    | NA                | NA                                                                     | NA                                | rs201090664 | NA |
| chr19 | 35175179 | 35175179 | C      | A    | exonic       | ZNF302    | nonsynonymous SNV | 1_001012320:exon5:c.C237A:p.N79K,ZNF302:NM_018443:exon5:c.C237A:p.N79K | NA                                | NA          | NA |
| chr19 | 35577870 | 35577870 | G      | A    | ncRNA_exonic | HPN-AS1   | NA                | NA                                                                     | NA                                | rs7250814   | NA |
| chr19 | 35612159 | 35612159 | C      | G    | exonic       | FXYD3     | nonsynonymous SNV | 001136010:exon5:c.C107G:p.P36R,FXYD3:NM_001136009:exon6:c.C107G:p.P36R | NA                                | rs2290649   | NA |
| chr19 | 35617639 | 35617639 | C      | G    | exonic       | LGI4      | synonymous SNV    | LGI4:NM_139284:exon8:c.G834C:p.P278P                                   | NA                                | rs1687998   | NA |
| chr19 | 35739702 | 35739702 | G      | A    | UTR5         | LSR       | NA                | NA                                                                     | NA                                | rs16970163  | NA |
| chr19 | 35942122 | 35942122 | T      | A    | UTR3         | FFAR2     | NA                | NA                                                                     | NA                                | NA          | NA |
| chr19 | 35942146 | 35942146 | G      | A    | UTR3         | FFAR2     | NA                | NA                                                                     | NA                                | NA          | NA |
| chr19 | 36164350 | 36164350 | A      | C    | exonic       | UPK1A     | nonsynonymous SNV | UPK1A:NM_007000:exon4:c.A371C:p.N124T                                  | NA                                | NA          | D  |
| chr19 | 36430384 | 36430384 | A      | C    | exonic       | LRFN3     | synonymous SNV    | LRFN3:NM_024509:exon2:c.A57C:p.P19P                                    | NA                                | NA          | NA |
| chr19 | 36523759 | 36523759 | G      | T    | UTR5         | CLIP3     | NA                | NA                                                                     | NA                                | rs62109714  | NA |
| chr19 | 36546015 | 36546015 | C      | T    | exonic       | WDR62     | nonsynonymous SNV | M_001083961:exon1:c.C142T:p.L48F,WDR62:NM_173636:exon1:c.C142T:p.L48F  | NA                                | rs62109744  | B  |
| chr19 | 36606379 | 36606379 | -      | CAG  | UTR5         | TBCB      | NA                | NA                                                                     | NA                                | rs199646187 | NA |
| chr19 | 36643433 | 36643438 | GGGGCT | -    | UTR5         | COX7A1    | NA                | NA                                                                     | NA                                | rs139129236 | NA |
| chr19 | 36827322 | 36827322 | A      | G    | UTR3         | ZFP14     | NA                | NA                                                                     | NA                                | rs2967502   | NA |
| chr19 | 36827856 | 36827856 | A      | T    | UTR3         | ZFP14     | NA                | NA                                                                     | NA                                | NA          | NA |
| chr19 | 36827857 | 36827857 | T      | A    | UTR3         | ZFP14     | NA                | NA                                                                     | NA                                | NA          | NA |
| chr19 | 36827859 | 36827859 | A      | T    | UTR3         | ZFP14     | NA                | NA                                                                     | NA                                | NA          | NA |
| chr19 | 36830726 | 36830731 | TATAAT | -    | UTR3         | ZFP14     | NA                | NA                                                                     | NA                                | rs75308843  | NA |
| chr19 | 36937172 | 36937173 | TT     | -    | UTR3         | ZNF566    | NA                | NA                                                                     | NA                                | NA          | NA |
| chr19 | 37620610 | 37620610 | A      | -    | UTR3         | ZNF420    | NA                | NA                                                                     | NA                                | NA          | NA |
| chr19 | 37759202 | 37759202 | T      | -    | ncRNA_exonic | LOC284412 | NA                | NA                                                                     | NA                                | NA          | NA |
| chr19 | 38031167 | 38031167 | -      | A    | UTR3         | ZNF793    | NA                | NA                                                                     | NA                                | NA          | NA |
| chr19 | 39359607 | 39359607 | T      | -    | UTR3         | RINL      | NA                | NA                                                                     | NA                                | NA          | NA |
| chr19 | 39980412 | 39980412 | C      | T    | exonic       | TIMM50    | synonymous SNV    | TIMM50:NM_001001563:exon11:c.C1323T:p.F441F                            | NA                                | rs114194716 | NA |
| chr19 | 40021719 | 40021719 | A      | -    | UTR3         | EID2B     | NA                | NA                                                                     | NA                                | rs34833151  | NA |
| chr19 | 40376662 | 40376662 | G      | C    | exonic       | FCGBP     | nonsynonymous SNV | FCGBP:NM_003890:exon24:c.C11760G:p.H3920Q                              | NA                                | rs2542318   | NA |
| chr19 | 40389741 | 40389741 | A      | G    | exonic       | FCGBP     | nonsynonymous SNV | FCGBP:NM_003890:exon18:c.T8441C:p.V2814A                               | NA                                | rs141158749 | NA |
| chr19 | 40946794 | 40946794 | A      | -    | UTR3         | SERTAD3   | NA                | NA                                                                     | NA                                | NA          | NA |
| chr19 | 41082868 | 41082868 | T      | C    | exonic       | SHKBP1    | synonymous SNV    | SHKBP1:NM_138392:exon1:c.T63C:p.I21I                                   | NA                                | rs16974365  | NA |
| chr19 | 41524087 | 41524087 | A      | G    | UTR3         | CYP2B6    | NA                | NA                                                                     | NA                                | rs707265    | NA |
| chr19 | 41903220 | 41903220 | G      | A    | exonic       | EXOSC5    | nonsynonymous SNV | EXOSC5:NM_020158:exon1:c.C14T:p.T5M                                    | NA                                | rs10853751  | B  |
| chr19 | 42470853 | 42470853 | A      | G    | UTR3         | ATP1A3    | NA                | NA                                                                     | NA                                | rs199854166 | NA |
| chr19 | 42595123 | 42595123 | T      | -    | UTR3         | POU2F2    | NA                | NA                                                                     | NA                                | NA          | NA |

|       |          |                    |    |          |              |             |                   |                                                               |                                  |             |    |
|-------|----------|--------------------|----|----------|--------------|-------------|-------------------|---------------------------------------------------------------|----------------------------------|-------------|----|
| chr19 | 42595247 | 42595247           | T  | -        | UTR3         | POU2F2      | NA                | NA                                                            | NA                               | NA          | NA |
| chr19 | 42728379 | 42728379           | T  | G        | UTR5         | ZNF526      | NA                | NA                                                            | NA                               | NA          | NA |
| chr19 | 42730237 | 42730237           | G  | C        | exonic       | ZNF526      | nonsynonymous SNV | ZNF526:NM_133444:exon3:c.G1682C:p.R561P                       | NA                               | NA          | D  |
| chr19 | 43697229 | 43697229           | G  | A        | UTR3         | PSG4        | NA                | NA                                                            | NA                               | rs8603      | NA |
| chr19 | 44126738 | 44126738           | G  | A        | UTR3         | CADM4       | NA                | NA                                                            | NA                               | rs433226    | NA |
| chr19 | 44127125 | 44127125           | A  | C        | UTR3         | CADM4       | NA                | NA                                                            | NA                               | NA          | NA |
| chr19 | 44127129 | 44127129           | T  | C        | UTR3         | CADM4       | NA                | NA                                                            | NA                               | NA          | NA |
| chr19 | 44127153 | 44127153           | A  | C        | UTR3         | CADM4       | NA                | NA                                                            | NA                               | NA          | NA |
| chr19 | 44174249 | 44174249           | C  | T        | exonic       | PLAUR       | synonymous SNV    | :c.G24A:p.P8P,PLAUR:NM_001005377:exon1:c.G24A:p.P8P,PLAUR:NM  | NA                               | rs62639324  | NA |
| chr19 | 45001346 | 45001346           | G  | A        | exonic       | ZNF180      | nonsynonymous SNV | ZNF180:NM_013256:exon2:c.C122T:p.A41V                         | NA                               | rs2571108   | B  |
| chr19 | 45004305 | 45004305           | G  | C        | UTR5         | ZNF180      | NA                | NA                                                            | NA                               | rs12977470  | NA |
| chr19 | 45161174 | 45161174           | C  | A        | exonic       | PVR         | synonymous SNV    | _001135769:exon5:c.C987A:p.V329V,PVR:NM_001135770:exon5:c.C98 | NA                               | NA          | NA |
| chr19 | 45452694 | 45452694           | -  | T        | ncRNA_exonic | APOC4-APOC2 | NA                | NA                                                            | NA                               | rs150448996 | NA |
| chr19 | 45683494 | 45683494           | T  | -        | UTR3         | BLOC1S3     | NA                | NA                                                            | NA                               | rs60498449  | NA |
| chr19 | 45806163 | 45806163           | G  | -        | UTR3         | MARK4       | NA                | NA                                                            | NA                               | rs34473699  | NA |
| chr19 | 45911330 | 45911330           | T  | A        | UTR3         | ERCC1       | NA                | NA                                                            | NA                               | rs2013521   | NA |
| chr19 | 45976591 | 45976591           | A  | G        | UTR3         | FOSB        | NA                | NA                                                            | NA                               | NA          | NA |
| chr19 | 45976636 | 45976636           | T  | G        | UTR3         | FOSB        | NA                | NA                                                            | NA                               | rs10424098  | NA |
| chr19 | 45977630 | 45977630           | A  | C        | UTR3         | FOSB        | NA                | NA                                                            | NA                               | NA          | NA |
| chr19 | 46005564 | 46005564           | T  | A        | UTR3         | PPM1N       | NA                | NA                                                            | NA                               | rs73568912  | NA |
| chr19 | 46093211 | 46093211           | T  | C        | UTR3         | GPR4        | NA                | NA                                                            | NA                               | rs1045217   | NA |
| chr19 | 46214291 | 46214291           | G  | T        | UTR3         | FBXO46      | NA                | NA                                                            | NA                               | rs66535058  | NA |
| chr19 | 46272195 | 46272195           | A  | C        | UTR5         | SIX5        | NA                | NA                                                            | NA                               | NA          | NA |
| chr19 | 46286273 | 46286273           | A  | G        | UTR3         | DMWD        | NA                | NA                                                            | NA                               | NA          | NA |
| chr19 | 46442775 | 46442775           | G  | A        | UTR3         | NOVA2       | NA                | NA                                                            | NA                               | NA          | NA |
| chr19 | 46893943 | 46893943           | A  | G        | UTR3         | PPP5C       | NA                | NA                                                            | NA                               | NA          | NA |
| chr19 | 46974652 | 46974652           | G  | C        | UTR5         | PNMAL1      | NA                | NA                                                            | NA                               | rs3826855   | NA |
| chr19 | 46974678 | 46974678           | C  | G        | UTR5         | PNMAL1      | NA                | NA                                                            | NA                               | rs8103767   | NA |
| chr19 | 47333843 | 47333843           | A  | T        | ncRNA_exonic | SNAR-E      | NA                | NA                                                            | NA                               | rs59789527  | NA |
| chr19 | 47724683 | 47724683           | -  | C        | UTR3         | BBC3        | NA                | NA                                                            | NA                               | NA          | NA |
| chr19 | 47724692 | 47724692           | T  | C        | UTR3         | BBC3        | NA                | NA                                                            | NA                               | rs2862236   | NA |
| chr19 | 47768128 | 47768128           | G  | C        | exonic       | CCDC9       | nonsynonymous SNV | CCDC9:NM_015603:exon7:c.G645C:p.E215D                         | NA                               | rs2032811   | NA |
| chr19 | 47824788 | 47824788           | -  | C        | UTR3         | C5AR1       | NA                | NA                                                            | NA                               | rs35042977  | NA |
| chr19 | 48182787 | 48182787           | C  | T        | exonic       | GLTSCR1     | synonymous SNV    | GLTSCR1:NM_015711:exon6:c.C360T:p.A120A                       | NA                               | rs4802382   | NA |
| chr19 | 48305566 | 48305566           | C  | T        | exonic       | TPRX1       | synonymous SNV    | TPRX1:NM_198479:exon2:c.G702A:p.P234P                         | :OSM998808;OCCURENCE=1(endometr  | rs12463317  | NA |
| chr19 | 48305622 | 48305622           | A  | G        | exonic       | TPRX1       | nonsynonymous SNV | TPRX1:NM_198479:exon2:c.T646C:p.S216P                         | NA                               | rs201007421 | NA |
| chr19 | 48305634 | 48305634           | A  | G        | exonic       | TPRX1       | nonsynonymous SNV | TPRX1:NM_198479:exon2:c.T634C:p.S212P                         | NA                               | rs201640420 | NA |
| chr19 | 48305670 | 48305670           | A  | G        | exonic       | TPRX1       | nonsynonymous SNV | TPRX1:NM_198479:exon2:c.T598C:p.S200P                         | NA                               | rs201483839 | NA |
| chr19 | 48305694 | 48305694           | A  | G        | exonic       | TPRX1       | nonsynonymous SNV | TPRX1:NM_198479:exon2:c.T574C:p.S192P                         | NA                               | rs200053895 | NA |
| chr19 | 48343993 | 48343993           | G  | A        | UTR3         | CRX         | NA                | NA                                                            | NA                               | rs55835533  | NA |
| chr19 | 48344829 | 48344830           | TT | -        | UTR3         | CRX         | NA                | NA                                                            | NA                               | NA          | NA |
| chr19 | 48374415 | 48374415           | G  | T        | UTR3         | SULT2A1     | NA                | NA                                                            | NA                               | rs296367    | NA |
| chr19 | 48711375 | 48711375           | -  | T        | UTR3         | CARD8       | NA                | NA                                                            | NA                               | NA          | NA |
| chr19 | 48964622 | 48964622           | -  | A        | intronic     | KCNJ14      | NA                | NA                                                            | NA                               | rs35350309  | NA |
| chr19 | 48969339 | 48969339           | T  | -        | UTR3         | KCNJ14      | NA                | NA                                                            | NA                               | rs72206497  | NA |
| chr19 | 48984059 | 48984059           | C  | G        | UTR3         | CYTH2       | NA                | NA                                                            | NA                               | NA          | NA |
| chr19 | 49132198 | 49132198           | A  | C        | exonic       | SPHK2       | nonsynonymous SNV | 15C:p.Y172S,SPHK2:NM_001204158:exon7:c.A956C:p.Y319S,SPHK2:NM | NA                               | rs200347384 | D  |
| chr19 | 49132201 | 49132201           | T  | C        | exonic       | SPHK2       | nonsynonymous SNV | 18C:p.L173P,SPHK2:NM_001204158:exon7:c.T959C:p.L320P,SPHK2:NM | NA                               | rs201628054 | D  |
| chr19 | 49185082 | 49185082           | A  | -        | ncRNA_exonic | SEC1P       | NA                | NA                                                            | NA                               | NA          | NA |
| chr19 | 49207689 | 49207699 \AAAAAAA/ | -  | -        | UTR3         | FUT2        | NA                | NA                                                            | NA                               | NA          | NA |
| chr19 | 49209139 | 49209139           | C  | A        | UTR3         | FUT2        | NA                | NA                                                            | NA                               | NA          | NA |
| chr19 | 49571148 | 49571148           | -  | TTTTTC   | UTR3         | KCNA7       | NA                | NA                                                            | NA                               | rs113434270 | NA |
| chr19 | 49571425 | 49571425           | G  | C        | UTR3         | KCNA7       | NA                | NA                                                            | NA                               | rs62127899  | NA |
| chr19 | 51412666 | 51412666           | C  | A        | exonic       | KLK4        | synonymous SNV    | KLK4:NM_004917:exon2:c.G66T:p.S22S                            | NA                               | rs1654552   | NA |
| chr19 | 51841417 | 51841417           | C  | T        | exonic       | VSIG10L     | nonsynonymous SNV | VSIG10L:NM_001163922:exon6:c.G1775A:p.R592Q                   | NA                               | rs34380065  | NA |
| chr19 | 51843808 | 51843808           | C  | T        | exonic       | VSIG10L     | nonsynonymous SNV | VSIG10L:NM_001163922:exon3:c.G1068A:p.M356I                   | NA                               | rs7259266   | NA |
| chr19 | 51850290 | 51850290           | G  | A        | exonic       | ETFB        | nonsynonymous SNV | _001014763:exon4:c.C734T:p.T245M,ETFB:NM_001985:exon5:c.C461T | NA                               | rs1130426   | P  |
| chr19 | 52132668 | 52132668           | T  | C        | exonic       | SIGLEC5     | nonsynonymous SNV | SIGLEC5:NM_003830:exon3:c.A643G:p.M215V                       | =COSM1129737;OCCURENCE=1(prostat | rs1807124   | B  |
| chr19 | 52197556 | 52197556           | -  | AGACTCAC | ncRNA_exonic | LINC00085   | NA                | NA                                                            | NA                               | rs150736418 | NA |
| chr19 | 53381429 | 53381429           | G  | T        | UTR3         | ZNF320      | NA                | NA                                                            | NA                               | rs2162919   | NA |
| chr19 | 53381495 | 53381507 TTTTTTTT  | -  | -        | UTR3         | ZNF320      | NA                | NA                                                            | NA                               | rs71183850  | NA |
| chr19 | 53431516 | 53431516           | T  | C        | ncRNA_exonic | ZNF321P     | NA                | NA                                                            | NA                               | rs12984436  | NA |
| chr19 | 53667387 | 53667387           | T  | -        | UTR3         | ZNF665      | NA                | NA                                                            | NA                               | rs35735454  | NA |
| chr19 | 53761591 | 53761591           | T  | G        | UTR5         | VN1R2       | NA                | NA                                                            | NA                               | rs61576844  | NA |
| chr19 | 53914545 | 53914545           | -  | T        | UTR3         | ZNF765      | NA                | NA                                                            | NA                               | NA          | NA |
| chr19 | 53945959 | 53945959           | T  | C        | ncRNA_exonic | TPM3P9      | NA                | NA                                                            | NA                               | rs113488663 | NA |

|       |          |          |          |            |            |         |                         |                                                                 |                                 |             |    |
|-------|----------|----------|----------|------------|------------|---------|-------------------------|-----------------------------------------------------------------|---------------------------------|-------------|----|
| chr19 | 54378026 | 54378026 | T        | -          | UTR3       | MYADM   | NA                      | NA                                                              | NA                              | rs67727940  | NA |
| chr19 | 54378030 | 54378030 | T        | C          | UTR3       | MYADM   | NA                      | NA                                                              | NA                              | rs200046918 | NA |
| chr19 | 54378454 | 54378467 | TGTGTGTG | -          | UTR3       | MYADM   | NA                      | NA                                                              | NA                              | NA          | NA |
| chr19 | 54693602 | 54693602 | C        | T          | UTR5       | MBOAT7  | NA                      | NA                                                              | NA                              | NA          | NA |
| chr19 | 54698196 | 54698198 | GGA      | -          | UTR3       | TSEN34  | NA                      | NA                                                              | NA                              | rs146122151 | NA |
| chr19 | 54724407 | 54724407 | C        | T          | exonic     | LILRB3  | nonsynonymous SNV       | 01081450:exon6:c.G1249A:p.V417M,LILRB3:NM_006864:exon6:c.G12    | NA                              | rs1132608   | B  |
| chr19 | 54724411 | 54724411 | C        | T          | exonic     | LILRB3  | synonymous SNV          | 001081450:exon6:c.G1245A:p.E415E,LILRB3:NM_006864:exon6:c.G12   | NA                              | rs1132607   | NA |
| chr19 | 54724430 | 54724430 | T        | A          | exonic     | LILRB3  | nonsynonymous SNV       | 001081450:exon6:c.A1226T:p.H409L,LILRB3:NM_006864:exon6:c.A12   | NA                              | rs1132606   | B  |
| chr19 | 54725745 | 54725745 | A        | G          | exonic     | LILRB3  | nonsynonymous SNV       | _001081450:exon4:c.T613C:p.W205R,LILRB3:NM_006864:exon4:c.T61:  | NA                              | rs1052973   | B  |
| chr19 | 54725755 | 54725755 | T        | C          | exonic     | LILRB3  | synonymous SNV          | _001081450:exon4:c.A603G:p.T201T,LILRB3:NM_006864:exon4:c.A60:  | NA                              | rs1052971   | NA |
| chr19 | 54725756 | 54725756 | G        | A          | exonic     | LILRB3  | nonsynonymous SNV       | 4_001081450:exon4:c.C602T:p.T201I,LILRB3:NM_006864:exon4:c.C60: | NA                              | rs1052970   | B  |
| chr19 | 54726870 | 54726870 | C        | G          | UTR5       | LILRB3  | NA                      | NA                                                              | NA                              | rs117942579 | NA |
| chr19 | 54745978 | 54745978 | T        | C          | exonic     | LILRA6  | synonymous SNV          | LILRA6:NM_024318:exon3:c.A279G:p.A93A                           | NA                              | rs1052964   | NA |
| chr19 | 54745989 | 54745989 | G        | C          | exonic     | LILRA6  | nonsynonymous SNV       | LILRA6:NM_024318:exon3:c.C268G:p.Q90E                           | NA                              | rs1052963   | NA |
| chr19 | 54948053 | 54948053 | A        | -          | downstream | TTYH1   | NA                      | NA                                                              | NA                              | NA          | NA |
| chr19 | 54962467 | 54962467 | G        | A          | UTR5       | LENG8   | NA                      | NA                                                              | NA                              | rs1035451   | NA |
| chr19 | 54974167 | 54974167 | A        | C          | exonic     | LENG9   | synonymous SNV          | LENG9:NM_198988:exon1:c.T609G:p.G203G                           | NA                              | NA          | NA |
| chr19 | 55241209 | 55241209 | C        | T          | exonic     | KIR3DL3 | synonymous SNV          | KIR3DL3:NM_153443:exon5:c.C906T:p.H302H                         | NA                              | rs34847288  | NA |
| chr19 | 55247987 | 55247987 | -        | :CTTTCCTC/ | UTR3       | KIR3DL3 | NA                      | NA                                                              | NA                              | NA          | NA |
| chr19 | 55253465 | 55253465 | C        | G          | exonic     | KIR2DL3 | nonsynonymous SNV       | KIR2DL3:NM_015868:exon3:c.C110G:p.P37R                          | NA                              | rs201272358 | NA |
| chr19 | 55253544 | 55253544 | A        | G          | exonic     | KIR2DL3 | synonymous SNV          | KIR2DL3:NM_015868:exon3:c.A189G:p.E63E                          | NA                              | rs34790392  | NA |
| chr19 | 55253552 | 55253552 | T        | A          | exonic     | KIR2DL3 | nonsynonymous SNV       | KIR2DL3:NM_015868:exon3:c.T197A:p.F66Y                          | ID=COSM321259;OCCURENCE=1(lung) | rs673568    | NA |
| chr19 | 55253601 | 55253601 | G        | A          | exonic     | KIR2DL3 | synonymous SNV          | KIR2DL3:NM_015868:exon3:c.G246A:p.K82K                          | NA                              | rs201337670 | NA |
| chr19 | 55294454 | 55294454 | C        | T          | exonic     | KIR2DL1 | nonsynonymous SNV       | KIR2DL1:NM_014218:exon6:c.C796T:p.R266C                         | NA                              | rs151328241 | NA |
| chr19 | 55330019 | 55330019 | C        | T          | exonic     | KIR3DL1 | nonsynonymous SNV       | KIR3DL1:NM_013289:exon3:c.C320T:p.S107L                         | NA                              | rs143159382 | NA |
| chr19 | 55358681 | 55358681 | T        | A          | exonic     | KIR2DS4 | unknown                 | UNKNOWN                                                         | NA                              | NA          | NA |
| chr19 | 55359227 | 55359227 | A        | G          | exonic     | KIR2DS4 | unknown                 | UNKNOWN                                                         | NA                              | rs199738147 | NA |
| chr19 | 55359654 | 55359654 | C        | G          | UTR3       | KIR2DS4 | NA                      | NA                                                              | NA                              | rs1743310   | NA |
| chr19 | 55359891 | 55359891 | A        | G          | UTR3       | KIR2DS4 | NA                      | NA                                                              | NA                              | NA          | NA |
| chr19 | 55359921 | 55359921 | -        | TGTTTCAC/  | UTR3       | KIR2DS4 | NA                      | NA                                                              | NA                              | NA          | NA |
| chr19 | 55359931 | 55359931 | C        | T          | UTR3       | KIR2DS4 | NA                      | NA                                                              | NA                              | NA          | NA |
| chr19 | 55359934 | 55359934 | T        | C          | UTR3       | KIR2DS4 | NA                      | NA                                                              | NA                              | NA          | NA |
| chr19 | 55359996 | 55359996 | C        | T          | UTR3       | KIR2DS4 | NA                      | NA                                                              | NA                              | NA          | NA |
| chr19 | 55401412 | 55401412 | T        | C          | UTR3       | FCAR    | NA                      | NA                                                              | NA                              | rs59103589  | NA |
| chr19 | 55401447 | 55401447 | G        | T          | UTR3       | FCAR    | NA                      | NA                                                              | NA                              | rs58560391  | NA |
| chr19 | 55401474 | 55401474 | T        | C          | UTR3       | FCAR    | NA                      | NA                                                              | NA                              | rs60304316  | NA |
| chr19 | 55401481 | 55401481 | A        | G          | UTR3       | FCAR    | NA                      | NA                                                              | NA                              | rs59309328  | NA |
| chr19 | 55424424 | 55424426 | TTT      | -          | UTR3       | NCR1    | NA                      | NA                                                              | NA                              | rs200857637 | NA |
| chr19 | 55435140 | 55435140 | T        | C          | exonic     | NLRP7   | nonsynonymous SNV       | p.T971A,NLRP7:NM_001127255:exon11:c.A3082G:p.T1028A,NLRP7:NI    | NA                              | rs7256020   | B  |
| chr19 | 55441995 | 55441995 | A        | G          | exonic     | NLRP7   | synonymous SNV          | :682C:p.Y894Y,NLRP7:NM_139176:exon9:c.T2598C:p.Y866Y,NLRP7:NM   | NA                              | rs269951    | NA |
| chr19 | 55715309 | 55715309 | C        | T          | exonic     | PTPRH   | nonsynonymous SNV       | PTPRH:NM_002842:exon5:c.G727A:p.V243I                           | NA                              | rs45535035  | B  |
| chr19 | 55715319 | 55715319 | C        | G          | exonic     | PTPRH   | synonymous SNV          | PTPRH:NM_002842:exon5:c.G717C:p.S239S                           | NA                              | rs9304763   | NA |
| chr19 | 55873642 | 55873642 | C        | T          | exonic     | FAM71E2 | nonsynonymous SNV       | FAM71E2:NM_001145402:exon3:c.G535A:p.E179K                      | NA                              | rs4252574   | NA |
| chr19 | 55987871 | 55987871 | A        | C          | UTR5       | ZNF628  | NA                      | NA                                                              | NA                              | rs11667987  | NA |
| chr19 | 56029616 | 56029616 | -        | CCA        | exonic     | SSC5D   | nonframeshift insertion | SSC5D:NM_001144950:exon14:c.3973_3974insCCA:p.P1325delinsPT     | NA                              | rs150781976 | NA |
| chr19 | 56047448 | 56047448 | A        | G          | exonic     | SBK2    | nonsynonymous SNV       | SBK2:NM_001101401:exon2:c.T214C:p.C72R                          | NA                              | rs310453    | B  |
| chr19 | 56162776 | 56162776 | C        | T          | exonic     | CCDC106 | synonymous SNV          | CCDC106:NM_013301:exon5:c.C441T:p.S147S                         | NA                              | rs2287791   | NA |
| chr19 | 56171893 | 56171893 | G        | C          | exonic     | U2AF2   | nonsynonymous SNV       | 4_001012478:exon4:c.G242C:p.R81P,U2AF2:NM_007279:exon4:c.G24    | NA                              | NA          | B  |
| chr19 | 56388364 | 56388364 | T        | A          | exonic     | NLRP4   | stopgain SNV            | NLRP4:NM_134444:exon8:c.T2528A:p.L843X                          | NA                              | NA          | NA |
| chr19 | 56499769 | 56499769 | A        | G          | UTR3       | NLRP8   | NA                      | NA                                                              | NA                              | rs76087581  | NA |
| chr19 | 57019251 | 57019253 | CTT      | -          | UTR5       | ZNF471  | NA                      | NA                                                              | NA                              | rs202156180 | NA |
| chr19 | 57039314 | 57039314 | A        | G          | UTR3       | ZNF471  | NA                      | NA                                                              | NA                              | rs960996    | NA |
| chr19 | 57039791 | 57039791 | A        | -          | UTR3       | ZNF471  | NA                      | NA                                                              | NA                              | rs5828685   | NA |
| chr19 | 57050515 | 57050515 | C        | G          | exonic     | ZFP28   | nonsynonymous SNV       | ZFP28:NM_020828:exon1:c.C128G:p.A43G                            | NA                              | rs7258088   | B  |
| chr19 | 57079083 | 57079083 | T        | C          | UTR5       | ZNF470  | NA                      | NA                                                              | NA                              | rs62124111  | NA |
| chr19 | 57091966 | 57091966 | -        | TT         | UTR3       | ZNF470  | NA                      | NA                                                              | NA                              | NA          | NA |
| chr19 | 57135240 | 57135240 | A        | G          | UTR3       | ZNF71   | NA                      | NA                                                              | NA                              | rs76311202  | NA |
| chr19 | 57703077 | 57703077 | T        | G          | UTR5       | ZNF264  | NA                      | NA                                                              | NA                              | rs2302058   | NA |
| chr19 | 57733715 | 57733719 | AAAAA    | -          | UTR3       | ZNF264  | NA                      | NA                                                              | NA                              | NA          | NA |
| chr19 | 57841082 | 57841082 | G        | A          | UTR3       | ZNF543  | NA                      | NA                                                              | NA                              | rs78764250  | NA |
| chr19 | 57890360 | 57890360 | T        | C          | UTR3       | ZNF547  | NA                      | NA                                                              | NA                              | rs8100747   | NA |
| chr19 | 57922664 | 57922664 | T        | C          | UTR5       | ZNF17   | NA                      | NA                                                              | NA                              | rs4801480   | NA |
| chr19 | 58220579 | 58220579 | -        | C          | UTR5       | ZNF154  | NA                      | NA                                                              | NA                              | rs112786452 | NA |
| chr19 | 58231745 | 58231745 | A        | G          | UTR3       | ZNF671  | NA                      | NA                                                              | NA                              | NA          | NA |
| chr19 | 58638852 | 58638852 | A        | -          | UTR3       | ZNF329  | NA                      | NA                                                              | NA                              | NA          | NA |
| chr19 | 58790359 | 58790359 | C        | A          | UTR5       | ZNF8    | NA                      | NA                                                              | NA                              | rs11666156  | NA |



|       |          |          |          |      |              |              |                   |                                                                |                                |             |    |
|-------|----------|----------|----------|------|--------------|--------------|-------------------|----------------------------------------------------------------|--------------------------------|-------------|----|
| chr19 | 58968875 | 58968875 | A        | C    | UTR3         | ZNF324B      | NA                | NA                                                             | NA                             | rs1077420   | NA |
| chr19 | 59028629 | 59028629 | T        | G    | exonic       | ZBTB45       | nonsynonymous SNV | ZBTB45:NM_032792:exon2:c.A412C:p.T138P                         | NA                             | NA          | B  |
| chr19 | 59085786 | 59085786 | -        | C    | ncRNA_exonic | LOC100131691 | NA                | NA                                                             | NA                             | rs201939924 | NA |
| chr19 | 59093604 | 59093604 | A        | -    | ncRNA_exonic | MGC2752      | NA                | NA                                                             | NA                             | NA          | NA |
| chr20 | 309162   | 309162   | T        | -    | UTR3         | SOX12        | NA                | NA                                                             | NA                             | rs5839854   | NA |
| chr20 | 361316   | 361316   | A        | G    | UTR5         | TRIB3        | NA                | NA                                                             | NA                             | rs7261666   | NA |
| chr20 | 361323   | 361323   | T        | C    | UTR5         | TRIB3        | NA                | NA                                                             | NA                             | rs7263534   | NA |
| chr20 | 825318   | 825318   | -        | T    | UTR5         | FAM110A      | NA                | NA                                                             | NA                             | NA          | NA |
| chr20 | 939130   | 939130   | T        | A    | UTR3         | RSPO4        | NA                | NA                                                             | NA                             | rs480012    | NA |
| chr20 | 1286474  | 1286474  | T        | G    | exonic       | SNPH         | nonsynonymous SNV | SNPH:NM_014723:exon6:c.T1261G:p.W421G                          | NA                             | NA          | D  |
| chr20 | 1551485  | 1551485  | C        | T    | exonic       | SIRPB1       | synonymous SNV    | SIRPB1:NM_006065:exon4:c.G1050A:p.A350A                        | NA                             | rs2254458   | NA |
| chr20 | 1615959  | 1615959  | T        | C    | exonic       | SIRPG        | synonymous SNV    | SIRPG:NM_018556:exon4:c.A1035G:p.L345L                         | NA                             | rs9305125   | NA |
| chr20 | 1895950  | 1895950  | C        | G    | exonic       | SIRPA        | nonsynonymous SNV | :285G:p.D95E,SIRPA:NM_001040022:exon3:c.C285G:p.D95E,SIRPA:NM  | NA                             | rs1135200   | B  |
| chr20 | 1895951  | 1895951  | C        | T    | exonic       | SIRPA        | nonsynonymous SNV | .C286T:p.L96F,SIRPA:NM_001040022:exon3:c.C286T:p.L96F,SIRPA:NM | NA                             | rs149634649 | B  |
| chr20 | 1895952  | 1895952  | T        | C    | exonic       | SIRPA        | nonsynonymous SNV | T287C:p.L96P,SIRPA:NM_001040022:exon3:c.T287C:p.L96P,SIRPA:NM  | NA                             | rs146163282 | B  |
| chr20 | 1895963  | 1895963  | A        | G    | exonic       | SIRPA        | nonsynonymous SNV | 18G:p.N100D,SIRPA:NM_001040022:exon3:c.A298G:p.N100D,SIRPA:NI  | NA                             | rs17855613  | B  |
| chr20 | 1895965  | 1895965  | C        | A    | exonic       | SIRPA        | nonsynonymous SNV | 30A:p.N100K,SIRPA:NM_001040022:exon3:c.C300A:p.N100K,SIRPA:NI  | NA                             | rs17855614  | B  |
| chr20 | 1895984  | 1895984  | C        | A    | exonic       | SIRPA        | nonsynonymous SNV | :19A:p.R107S,SIRPA:NM_001040022:exon3:c.C319A:p.R107S,SIRPA:NM | NA                             | rs17855615  | P  |
| chr20 | 1895990  | 1895990  | G        | A    | exonic       | SIRPA        | nonsynonymous SNV | 25A:p.G109S,SIRPA:NM_001040022:exon3:c.G325A:p.G109S,SIRPA:NI  | NA                             | rs1135202   | B  |
| chr20 | 2945759  | 2945759  | C        | T    | exonic       | PTPRA        | nonsynonymous SNV | 326T:p.P109L,PTPRA:NM_080841:exon5:c.C326T:p.P109L,PTPRA:NM_0= | COSM149129;OCCURENCE=1(stomacl | rs1178027   | D  |
| chr20 | 3089363  | 3089363  | GA       | -    | ncRNA_UTR3   | UBOX5        | NA                | NA                                                             | NA                             | rs142269465 | NA |
| chr20 | 3204434  | 3204434  | G        | T    | UTR3         | ITPA         | NA                | NA                                                             | NA                             | NA          | NA |
| chr20 | 3515924  | 3515924  | G        | A    | exonic       | ATRN         | synonymous SNV    | G87A:p.V29V,ATRN:NM_139321:exon2:c.G435A:p.V145V,ATRN:NM_1     | NA                             | rs151518    | NA |
| chr20 | 3515951  | 3515951  | C        | T    | exonic       | ATRN         | synonymous SNV    | :C114T:p.Y38Y,ATRN:NM_139321:exon2:c.C462T:p.Y154Y,ATRN:NM_1   | NA                             | rs151519    | NA |
| chr20 | 3564672  | 3564672  | C        | T    | exonic       | ATRN         | synonymous SNV    | :544T:p.Y848Y,ATRN:NM_139321:exon17:c.C2892T:p.Y964Y,ATRN:NM   | NA                             | rs235540    | NA |
| chr20 | 3677736  | 3677736  | T        | G    | exonic       | SIGLEC1      | synonymous SNV    | SIGLEC1:NM_023068:exon9:c.A2376C:p.V792V                       | NA                             | rs673114    | NA |
| chr20 | 3762095  | 3762095  | T        | C    | UTR5         | SPEF1        | NA                | NA                                                             | NA                             | rs2281479   | NA |
| chr20 | 4666924  | 4666924  | C        | G    | UTR5         | PRNP         | NA                | NA                                                             | NA                             | rs13040327  | NA |
| chr20 | 4708730  | 4708730  | T        | C    | UTR3         | PRND         | NA                | NA                                                             | NA                             | rs186333650 | NA |
| chr20 | 5454400  | 5454400  | A        | T    | ncRNA_exonic | LOC643406    | NA                | NA                                                             | NA                             | rs56059321  | NA |
| chr20 | 5481480  | 5481480  | C        | T    | ncRNA_exonic | LINC00654    | NA                | NA                                                             | NA                             | NA          | NA |
| chr20 | 5482058  | 5482058  | C        | T    | ncRNA_exonic | LINC00654    | NA                | NA                                                             | NA                             | rs201872341 | NA |
| chr20 | 5482103  | 5482103  | T        | C    | ncRNA_exonic | LINC00654    | NA                | NA                                                             | NA                             | rs200323153 | NA |
| chr20 | 5482155  | 5482155  | T        | C    | ncRNA_exonic | LINC00654    | NA                | NA                                                             | NA                             | rs113305726 | NA |
| chr20 | 6104068  | 6104068  | C        | T    | UTR5         | FERMT1       | NA                | NA                                                             | NA                             | rs2295433   | NA |
| chr20 | 10037110 | 10037110 | -        | GATA | ncRNA_UTR3   | ANKEF1       | NA                | NA                                                             | NA                             | rs5840352   | NA |
| chr20 | 10654563 | 10654563 | A        | C    | UTR5         | JAG1         | NA                | NA                                                             | NA                             | rs1051412   | NA |
| chr20 | 13695607 | 13695607 | T        | G    | exonic       | ESF1         | nonsynonymous SNV | :01276380:exon14:c.A2470C:p.I824L,ESF1:NM_016649:exon14:c.A247 | NA                             | rs34414644  | B  |
| chr20 | 13747441 | 13747441 | A        | G    | exonic       | ESF1         | nonsynonymous SNV | _001276380:exon8:c.T1649C:p.I550T,ESF1:NM_016649:exon8:c.T1649 | NA                             | rs3180370   | B  |
| chr20 | 17932210 | 17932210 | C        | T    | exonic       | SNX5         | synonymous SNV    | V_014426:exon6:c.G543A:p.E181E,SNX5:NM_152227:exon7:c.G543A:   | NA                             | rs2273448   | NA |
| chr20 | 17971053 | 17971053 | -        | G    | UTR3         | MGME1        | NA                | NA                                                             | NA                             | NA          | NA |
| chr20 | 19982007 | 19982011 | TTTTT    | -    | UTR3         | RIN2         | NA                | NA                                                             | NA                             | NA          | NA |
| chr20 | 22542568 | 22542575 | GAAAGAAA | -    | ncRNA_exonic | LINC00261    | NA                | NA                                                             | NA                             | NA          | NA |
| chr20 | 23966378 | 23966378 | A        | G    | exonic       | GGTLC1       | nonsynonymous SNV | 1_178311:exon5:c.T457C:p.W153R,GGTLC1:NM_178312:exon5:c.T457   | NA                             | rs3954815   | B  |
| chr20 | 23966384 | 23966384 | C        | T    | exonic       | GGTLC1       | nonsynonymous SNV | 1_178311:exon5:c.G451A:p.V151M,GGTLC1:NM_178312:exon5:c.G451   | NA                             | rs140956367 | B  |
| chr20 | 25124088 | 25124088 | G        | A    | ncRNA_exonic | LOC284798    | NA                | NA                                                             | NA                             | rs6050363   | NA |
| chr20 | 25754574 | 25754581 | ATATATAT | -    | ncRNA_exonic | FAM182B      | NA                | NA                                                             | NA                             | NA          | NA |
| chr20 | 25755940 | 25755940 | G        | T    | ncRNA_exonic | FAM182B      | NA                | NA                                                             | NA                             | rs79936808  | NA |
| chr20 | 26061803 | 26061803 | C        | A    | ncRNA_exonic | FAM182A      | NA                | NA                                                             | NA                             | rs78281752  | NA |
| chr20 | 26063547 | 26063547 | G        | T    | ncRNA_exonic | FAM182A      | NA                | NA                                                             | NA                             | NA          | NA |
| chr20 | 26063560 | 26063560 | G        | A    | ncRNA_exonic | FAM182A      | NA                | NA                                                             | NA                             | rs5742261   | NA |
| chr20 | 26063577 | 26063577 | C        | T    | ncRNA_exonic | FAM182A      | NA                | NA                                                             | NA                             | rs201158839 | NA |
| chr20 | 26063579 | 26063579 | C        | A    | ncRNA_exonic | FAM182A      | NA                | NA                                                             | NA                             | rs201752002 | NA |
| chr20 | 26063612 | 26063612 | C        | T    | ncRNA_exonic | FAM182A      | NA                | NA                                                             | NA                             | NA          | NA |
| chr20 | 26063665 | 26063665 | G        | A    | ncRNA_exonic | FAM182A      | NA                | NA                                                             | NA                             | NA          | NA |
| chr20 | 26063726 | 26063726 | T        | C    | ncRNA_exonic | FAM182A      | NA                | NA                                                             | NA                             | rs199551690 | NA |
| chr20 | 26063729 | 26063729 | G        | T    | ncRNA_exonic | FAM182A      | NA                | NA                                                             | NA                             | NA          | NA |
| chr20 | 26063752 | 26063752 | T        | C    | ncRNA_exonic | FAM182A      | NA                | NA                                                             | NA                             | rs78544920  | NA |
| chr20 | 26063805 | 26063805 | A        | G    | ncRNA_exonic | FAM182A      | NA                | NA                                                             | NA                             | rs78113344  | NA |
| chr20 | 26064303 | 26064303 | G        | C    | ncRNA_exonic | FAM182A      | NA                | NA                                                             | NA                             | rs200946927 | NA |
| chr20 | 26064305 | 26064305 | A        | G    | ncRNA_exonic | FAM182A      | NA                | NA                                                             | NA                             | rs201971148 | NA |
| chr20 | 26064328 | 26064328 | G        | T    | ncRNA_exonic | FAM182A      | NA                | NA                                                             | NA                             | rs140014678 | NA |
| chr20 | 26064330 | 26064330 | C        | T    | ncRNA_exonic | FAM182A      | NA                | NA                                                             | NA                             | rs151022794 | NA |
| chr20 | 26064408 | 26064408 | T        | A    | ncRNA_exonic | FAM182A      | NA                | NA                                                             | NA                             | NA          | NA |
| chr20 | 29623156 | 29623156 | G        | A    | ncRNA_exonic | FRG1B        | NA                | NA                                                             | NA                             | rs62198335  | NA |
| chr20 | 29625984 | 29625984 | T        | C    | ncRNA_exonic | FRG1B        | NA                | NA                                                             | NA                             | rs80066412  | NA |

|       |          |          |        |         |              |                                  |                   |                                                                                        |    |             |    |
|-------|----------|----------|--------|---------|--------------|----------------------------------|-------------------|----------------------------------------------------------------------------------------|----|-------------|----|
| chr20 | 29631613 | 29631613 | T      | C       | ncRNA_exonic | FRG1B                            | NA                | NA                                                                                     | NA | rs199635479 | NA |
| chr20 | 29631614 | 29631614 | G      | A       | ncRNA_exonic | FRG1B                            | NA                | NA                                                                                     | NA | rs200793872 | NA |
| chr20 | 29632638 | 29632638 | C      | A       | ncRNA_exonic | FRG1B                            | NA                | NA                                                                                     | NA | rs9647043   | NA |
| chr20 | 29632674 | 29632674 | -      | A       | ncRNA_exonic | FRG1B                            | NA                | NA                                                                                     | NA | rs138867112 | NA |
| chr20 | 29633915 | 29633915 | C      | T       | ncRNA_exonic | FRG1B                            | NA                | NA                                                                                     | NA | rs4066495   | NA |
| chr20 | 30433228 | 30433228 | T      | G       | exonic       | FOXS1                            | nonsynonymous SNV | FOXS1:NM_004118:exon1:c.A118C:p.T40P                                                   | NA | NA          | D  |
| chr20 | 31505189 | 31505189 | C      | T       | intergenic   | RE1(dist=66978),SUN5(dist=66978) | NA                | NA                                                                                     | NA | rs13043425  | NA |
| chr20 | 31627291 | 31627291 | A      | G       | exonic       | BPIFB6                           | nonsynonymous SNV | BPIFB6:NM_174897:exon10:c.A1039G:p.S347G                                               | NA | rs4911287   | B  |
| chr20 | 31656632 | 31656632 | C      | G       | exonic       | BPIFB3                           | nonsynonymous SNV | BPIFB3:NM_182658:exon10:c.C1002G:p.H334Q                                               | NA | rs6057717   | P  |
| chr20 | 31676804 | 31676804 | A      | C       | exonic       | BPIFB4                           | nonsynonymous SNV | BPIFB4:NM_182519:exon6:c.A959C:p.N320T                                                 | NA | rs2889732   | D  |
| chr20 | 31790318 | 31790318 | G      | T       | ncRNA_exonic | BPIFA4P                          | NA                | NA                                                                                     | NA | NA          | NA |
| chr20 | 32378915 | 32378915 | C      | T       | exonic       | ZNF341                           | synonymous SNV    | ZNF341:NM_032819:exon15:c.C2136T:p.G712G                                               | NA | NA          | NA |
| chr20 | 33470694 | 33470694 | C      | T       | exonic       | ACSS2                            | synonymous SNV    | VI_001076552:exon2:c.C276T:p.F92F,ACSS2:NM_018677:exon2:c.C276T:p.F92F                 | NA | rs4911163   | NA |
| chr20 | 33872109 | 33872109 | A      | C       | exonic       | EIF6                             | nonsynonymous SNV | EIF6:NM_181466:exon2:c.T182G:p.V61G                                                    | NA | NA          | NA |
| chr20 | 33873827 | 33873827 | T      | -       | UTR3         | FAM83C                           | NA                | NA                                                                                     | NA | rs11346452  | NA |
| chr20 | 34633828 | 34633828 | A      | -       | ncRNA_exonic | LINC00657                        | NA                | NA                                                                                     | NA | NA          | NA |
| chr20 | 35740794 | 35740794 | T      | C       | exonic       | MROH8                            | unknown           | UNKNOWN                                                                                | NA | rs1744760   | NA |
| chr20 | 35807790 | 35807790 | -      | GGCCCGC | exonic       | MROH8                            | unknown           | UNKNOWN                                                                                | NA | NA          | NA |
| chr20 | 36033692 | 36033692 | A      | C       | UTR3         | SRC                              | NA                | NA                                                                                     | NA | NA          | NA |
| chr20 | 36033745 | 36033745 | C      | G       | UTR3         | SRC                              | NA                | NA                                                                                     | NA | NA          | NA |
| chr20 | 42170327 | 42170327 | C      | T       | UTR3         | L3MBTL1                          | NA                | NA                                                                                     | NA | rs1062943   | NA |
| chr20 | 43707209 | 43707209 | T      | -       | UTR3         | STK4                             | NA                | NA                                                                                     | NA | rs34932056  | NA |
| chr20 | 43933163 | 43933163 | T      | C       | exonic       | MATN4                            | synonymous SNV    | 8G:p.A116A,MATN4:NM_030590:exon3:c.A348G:p.A116A,MATN4:NM_030590:exon3:c.A348G:p.A116A | NA | rs2233094   | NA |
| chr20 | 43954939 | 43954939 | A      | -       | UTR3         | SDC4                             | NA                | NA                                                                                     | NA | rs3091706   | NA |
| chr20 | 44141202 | 44141202 | CACACA | -       | UTR3         | SPINT3                           | NA                | NA                                                                                     | NA | rs201209920 | NA |
| chr20 | 44512996 | 44512996 | C      | T       | UTR3         | ZSWIM1                           | NA                | NA                                                                                     | NA | NA          | NA |
| chr20 | 46284869 | 46284869 | -      | T       | UTR3         | NCOA3                            | NA                | NA                                                                                     | NA | NA          | NA |
| chr20 | 46998794 | 46998794 | -      | A       | ncRNA_exonic | LINC00494                        | NA                | NA                                                                                     | NA | NA          | NA |
| chr20 | 48570261 | 48570261 | A      | G       | UTR3         | RNF114                           | NA                | NA                                                                                     | NA | rs141239729 | NA |
| chr20 | 48604985 | 48604985 | A      | C       | UTR3         | SNAI1                            | NA                | NA                                                                                     | NA | rs1063211   | NA |
| chr20 | 50214746 | 50214746 | T      | G       | UTR3         | ATP9A                            | NA                | NA                                                                                     | NA | NA          | NA |
| chr20 | 50768400 | 50768400 | A      | C       | UTR3         | ZFP64                            | NA                | NA                                                                                     | NA | NA          | NA |
| chr20 | 52184384 | 52184384 | T      | A       | UTR3         | ZNF217                           | NA                | NA                                                                                     | NA | rs718889    | NA |
| chr20 | 52560856 | 52560856 | TT     | -       | UTR3         | BCAS1                            | NA                | NA                                                                                     | NA | NA          | NA |
| chr20 | 52836074 | 52836074 | T      | C       | UTR3         | PFDN4                            | NA                | NA                                                                                     | NA | rs6023044   | NA |
| chr20 | 55940426 | 55940426 | G      | A       | exonic       | RAE1                             | synonymous SNV    | _001015885:exon5:c.G303A:p.V101V,RAE1:NM_003610:exon5:c.G303A:p.V101V                  | NA | rs6099582   | NA |
| chr20 | 56141218 | 56141218 | TG     | -       | UTR3         | PCK1                             | NA                | NA                                                                                     | NA | rs59710283  | NA |
| chr20 | 56141291 | 56141291 | T      | C       | UTR3         | PCK1                             | NA                | NA                                                                                     | NA | rs28359554  | NA |
| chr20 | 57253695 | 57253695 | -      | AA      | ncRNA_UTR3   | STX16                            | NA                | NA                                                                                     | NA | NA          | NA |
| chr20 | 57415823 | 57415823 | C      | A       | exonic       | GNAS                             | nonsynonymous SNV | GNAS:NM_016592:exon1:c.C662A:p.P221Q                                                   | NA | NA          | D  |
| chr20 | 57429696 | 57429696 | C      | G       | exonic       | GNAS                             | nonsynonymous SNV | 001077490:exon1:c.C1189G:p.L397V,GNAS:NM_080425:exon1:c.C137G:p.L397V                  | NA | rs148033592 | NA |
| chr20 | 57429715 | 57429715 | A      | C       | exonic       | GNAS                             | nonsynonymous SNV | GNAS:NM_001077490:exon1:c.A1208C:p.Q403P                                               | NA | rs56213454  | NA |
| chr20 | 57429718 | 57429718 | T      | C       | exonic       | GNAS                             | nonsynonymous SNV | GNAS:NM_001077490:exon1:c.T1211C:p.M404T                                               | NA | NA          | NA |
| chr20 | 57429719 | 57429719 | G      | T       | exonic       | GNAS                             | nonsynonymous SNV | 001077490:exon1:c.G1212T:p.M404I,GNAS:NM_080425:exon1:c.G139C:p.M404I                  | NA | rs56371919  | NA |
| chr20 | 57571763 | 57571763 | A      | G       | exonic       | CTSZ                             | synonymous SNV    | CTSZ:NM_001336:exon5:c.T732C:p.S244S                                                   | NA | rs9760      | NA |
| chr20 | 57609945 | 57609945 | C      | A       | ncRNA_UTR3   | SLMO2                            | NA                | NA                                                                                     | NA | NA          | NA |
| chr20 | 57609945 | 57609945 | -      | A       | ncRNA_UTR3   | SLMO2                            | NA                | NA                                                                                     | NA | NA          | NA |
| chr20 | 58442826 | 58442826 | C      | A       | exonic       | SYCP2                            | synonymous SNV    | SYCP2:NM_014258:exon38:c.G4065T:p.G1355G                                               | NA | rs6070981   | NA |
| chr20 | 60709531 | 60709531 | T      | -       | UTR3         | LSM14B                           | NA                | NA                                                                                     | NA | rs11477488  | NA |
| chr20 | 60897487 | 60897487 | C      | T       | exonic       | LAMA5                            | nonsynonymous SNV | LAMA5:NM_005560:exon47:c.G6184A:p.D2062N                                               | NA | rs2274934   | P  |
| chr20 | 60908279 | 60908279 | A      | G       | exonic       | LAMA5                            | nonsynonymous SNV | LAMA5:NM_005560:exon26:c.T3149C:p.L1050P                                               | NA | NA          | D  |
| chr20 | 60908282 | 60908282 | T      | G       | exonic       | LAMA5                            | nonsynonymous SNV | LAMA5:NM_005560:exon26:c.A3146C:p.H1049P                                               | NA | NA          | D  |
| chr20 | 61040453 | 61040453 | C      | G       | exonic       | GATA5                            | synonymous SNV    | GATA5:NM_080473:exon6:c.G981C:p.S327S                                                  | NA | rs6061243   | NA |
| chr20 | 61431557 | 61431557 | A      | C       | UTR3         | MRGBP                            | NA                | NA                                                                                     | NA | rs7397      | NA |
| chr20 | 61732917 | 61732917 | -      | CTCC    | ncRNA_exonic | HAR1A                            | NA                | NA                                                                                     | NA | rs111489452 | NA |
| chr20 | 61733058 | 61733058 | C      | T       | ncRNA_exonic | HAR1A                            | NA                | NA                                                                                     | NA | rs199531153 | NA |
| chr20 | 61733262 | 61733262 | C      | A       | ncRNA_exonic | HAR1A                            | NA                | NA                                                                                     | NA | rs6122371   | NA |
| chr20 | 61888814 | 61888814 | G      | C       | ncRNA_exonic | FLJ16779                         | NA                | NA                                                                                     | NA | NA          | NA |
| chr20 | 62037879 | 62037879 | A      | C       | UTR3         | KCNQ2                            | NA                | NA                                                                                     | NA | NA          | NA |
| chr20 | 62037884 | 62037884 | T      | C       | UTR3         | KCNQ2                            | NA                | NA                                                                                     | NA | NA          | NA |
| chr20 | 62038277 | 62038277 | T      | G       | exonic       | KCNQ2                            | nonsynonymous SNV | _172106:exon16:c.A2285C:p.N762T,KCNQ2:NM_172108:exon16:c.A2285C:p.N762T                | NA | rs1801475   | B  |
| chr20 | 62370295 | 62370295 | T      | C       | UTR3         | LIME1                            | NA                | NA                                                                                     | NA | NA          | NA |
| chr20 | 62378121 | 62378121 | C      | T       | UTR3         | ZBTB46                           | NA                | NA                                                                                     | NA | rs35982738  | NA |
| chr20 | 62591140 | 62591140 | T      | G       | UTR3         | ZNF512B                          | NA                | NA                                                                                     | NA | NA          | NA |
| chr21 | 9907345  | 9907345  | C      | T       | ncRNA_exonic | TEKT4P2                          | NA                | NA                                                                                     | NA | rs3694      | NA |
| chr21 | 9968544  | 9968544  | C      | G       | ncRNA_exonic | TEKT4P2                          | NA                | NA                                                                                     | NA | rs14244     | NA |

|       |          |          |          |        |              |            |                   |                                                                                               |             |             |    |
|-------|----------|----------|----------|--------|--------------|------------|-------------------|-----------------------------------------------------------------------------------------------|-------------|-------------|----|
| chr21 | 14424534 | 14424534 | A        | C      | ncRNA_exonic | ANKRD30BP2 | NA                | NA                                                                                            | NA          | NA          | NA |
| chr21 | 14439197 | 14439197 | G        | C      | ncRNA_exonic | ANKRD30BP2 | NA                | NA                                                                                            | NA          | rs184573568 | NA |
| chr21 | 15558346 | 15558346 | G        | A      | exonic       | LIPI       | synonymous SNV    | LIPI:NM_198996:exon3:c.C540T:p.S180S                                                          | NA          | rs397517    | NA |
| chr21 | 15646405 | 15646405 | C        | A      | ncRNA_exonic | ABCC13     | NA                | NA                                                                                            | NA          | rs2236001   | NA |
| chr21 | 26969703 | 26969703 | T        | C      | exonic       | MRPL39     | synonymous SNV    | M_017446:exon6:c.A612G:p.K204K,MRPL39:NM_080794:exon6:c.A61:                                  | NA          | rs1135618   | NA |
| chr21 | 27253248 | 27253248 | T        | C      | UTR3         | APP        | NA                | NA                                                                                            | NA          | NA          | NA |
| chr21 | 27253253 | 27253253 | A        | C      | UTR3         | APP        | NA                | NA                                                                                            | NA          | NA          | NA |
| chr21 | 27253262 | 27253262 | G        | C      | UTR3         | APP        | NA                | NA                                                                                            | NA          | NA          | NA |
| chr21 | 28338997 | 28338997 | T        | G      | UTR5         | ADAMTS5    | NA                | NA                                                                                            | NA          | NA          | NA |
| chr21 | 29912452 | 29912452 | C        | A      | ncRNA_exonic | LINC00161  | NA                | NA                                                                                            | NA          | rs2150392   | NA |
| chr21 | 31964885 | 31964885 | T        | G      | exonic       | KRTAP6-3   | nonsynonymous SNV | KRTAP6-3:NM_181605:exon1:c.T121G:p.C41G                                                       | NA          | NA          | NA |
| chr21 | 33043422 | 33043422 | A        | -      | UTR3         | SCAF4      | NA                | NA                                                                                            | NA          | rs71772238  | NA |
| chr21 | 34164046 | 34164046 | A        | -      | ncRNA_UTR3   | C21orf62   | NA                | NA                                                                                            | NA          | NA          | NA |
| chr21 | 34443831 | 34443831 | T        | G      | UTR3         | OLIG1      | NA                | NA                                                                                            | NA          | NA          | NA |
| chr21 | 34669259 | 34669259 | A        | -      | UTR3         | IL10RB     | NA                | NA                                                                                            | NA          | NA          | NA |
| chr21 | 34923934 | 34923934 | T        | C      | exonic       | SON        | synonymous SNV    | M_032195:exon3:c.T2397C:p.S799S,SON:NM_138927:exon3:c.T2397C:30344,COSM1030343;OCCURENCE=2(er | rs200724919 | NA          | NA |
| chr21 | 35237608 | 35237608 | T        | C      | exonic       | ITSN1      | synonymous SNV    | ITSN1:NM_003024:exon32:c.T4044C:p.D1348D                                                      | NA          | rs9976801   | NA |
| chr21 | 35561665 | 35561665 | A        | G      | ncRNA_exonic | LINC00310  | NA                | NA                                                                                            | NA          | rs6517211   | NA |
| chr21 | 35736384 | 35736384 | G        | A      | UTR5         | KCNE2      | NA                | NA                                                                                            | NA          | rs41260744  | NA |
| chr21 | 36089160 | 36089160 | -        | CACACA | UTR3         | CLIC6      | NA                | NA                                                                                            | NA          | NA          | NA |
| chr21 | 37518850 | 37518850 | G        | A      | ncRNA_UTR3   | CBR3       | NA                | NA                                                                                            | NA          | rs34911362  | NA |
| chr21 | 38121746 | 38121750 | TGACT    | -      | UTR3         | SIM2       | NA                | NA                                                                                            | NA          | rs113168269 | NA |
| chr21 | 38121750 | 38121750 | T        | -      | UTR3         | SIM2       | NA                | NA                                                                                            | NA          | rs61018468  | NA |
| chr21 | 38885228 | 38885229 | TT       | -      | UTR3         | DYRK1A     | NA                | NA                                                                                            | NA          | NA          | NA |
| chr21 | 40557441 | 40557442 | CT       | -      | UTR3         | BRWD1      | NA                | NA                                                                                            | NA          | rs202009663 | NA |
| chr21 | 42551109 | 42551109 | T        | G      | exonic       | PLAC4      | synonymous SNV    | PLAC4:NM_182832:exon1:c.A447C:p.S149S                                                         | NA          | NA          | NA |
| chr21 | 43131734 | 43131734 | T        | A      | ncRNA_exonic | LINC00479  | NA                | NA                                                                                            | NA          | rs2838094   | NA |
| chr21 | 43306769 | 43306769 | T        | -      | UTR3         | C2CD2      | NA                | NA                                                                                            | NA          | rs11347156  | NA |
| chr21 | 44438244 | 44438244 | T        | G      | exonic       | PKNOX1     | synonymous SNV    | PKNOX1:NM_004571:exon7:c.T624G:p.G208G                                                        | NA          | NA          | NA |
| chr21 | 44451935 | 44451935 | -        | A      | UTR3         | PKNOX1     | NA                | NA                                                                                            | NA          | rs138842830 | NA |
| chr21 | 44838948 | 44838948 | T        | G      | exonic       | SIK1       | nonsynonymous SNV | SIK1:NM_173354:exon11:c.A1415C:p.H472P                                                        | NA          | NA          | NA |
| chr21 | 45177868 | 45177868 | T        | -      | UTR3         | PDXK       | NA                | NA                                                                                            | NA          | NA          | NA |
| chr21 | 45230317 | 45230317 | T        | C      | ncRNA_exonic | LOC284837  | NA                | NA                                                                                            | NA          | NA          | NA |
| chr21 | 45230318 | 45230318 | G        | C      | ncRNA_exonic | LOC284837  | NA                | NA                                                                                            | NA          | NA          | NA |
| chr21 | 45230345 | 45230345 | G        | C      | ncRNA_exonic | LOC284837  | NA                | NA                                                                                            | NA          | NA          | NA |
| chr21 | 45538647 | 45538647 | T        | C      | exonic       | PWP2       | synonymous SNV    | PWP2:NM_005049:exon9:c.T984C:p.I328I                                                          | NA          | rs756553    | NA |
| chr21 | 45647837 | 45647853 | ACCACCCC | -      | UTR3         | ICOSLG     | NA                | NA                                                                                            | NA          | rs67226187  | NA |
| chr21 | 45732175 | 45732175 | A        | G      | exonic       | PFKL       | nonsynonymous SNV | PFKL:NM_002626:exon4:c.A425G:p.E142G                                                          | NA          | NA          | B  |
| chr21 | 45811294 | 45811294 | A        | C      | exonic       | TRPM2      | nonsynonymous SNV | TRPM2:NM_003307:exon11:c.A1580C:p.D527A                                                       | NA          | NA          | B  |
| chr21 | 46058252 | 46058252 | C        | A      | UTR3         | KRTAP10-10 | NA                | NA                                                                                            | NA          | rs142579519 | NA |
| chr21 | 46058255 | 46058255 | T        | A      | UTR3         | KRTAP10-10 | NA                | NA                                                                                            | NA          | rs117595201 | NA |
| chr21 | 46058257 | 46058257 | G        | A      | UTR3         | KRTAP10-10 | NA                | NA                                                                                            | NA          | rs112728315 | NA |
| chr21 | 47603591 | 47603591 | A        | G      | UTR5         | SPATC1L    | NA                | NA                                                                                            | NA          | NA          | NA |
| chr21 | 47603676 | 47603676 | C        | G      | UTR5         | SPATC1L    | NA                | NA                                                                                            | NA          | NA          | NA |
| chr21 | 47670633 | 47670633 | C        | G      | ncRNA_exonic | MCM3AP-AS1 | NA                | NA                                                                                            | NA          | rs4818829   | NA |
| chr21 | 47671275 | 47671275 | -        | AAT    | ncRNA_exonic | MCM3AP-AS1 | NA                | NA                                                                                            | NA          | rs17176758  | NA |
| chr21 | 47855876 | 47855876 | A        | G      | exonic       | PCNT       | synonymous SNV    | PCNT:NM_006031:exon39:c.A8811G:p.T2937T                                                       | NA          | rs17371795  | NA |
| chr22 | 17469049 | 17469049 | C        | A      | exonic       | GAB4       | stopgain SNV      | GAB4:NM_001037814:exon3:c.G487T:p.G163X                                                       | NA          | rs28502153  | NA |
| chr22 | 18300879 | 18300879 | G        | A      | exonic       | MICAL3     | synonymous SNV    | MICAL3:NM_015241:exon26:c.C4548T:p.S1516S                                                     | NA          | rs11704809  | NA |
| chr22 | 18519998 | 18519998 | T        | C      | ncRNA_exonic | FLJ41941   | NA                | NA                                                                                            | NA          | rs465508    | NA |
| chr22 | 18520582 | 18520582 | G        | A      | ncRNA_exonic | FLJ41941   | NA                | NA                                                                                            | NA          | rs975826    | NA |
| chr22 | 18775061 | 18775061 | G        | A      | ncRNA_exonic | GGT3P      | NA                | NA                                                                                            | NA          | rs189425726 | NA |
| chr22 | 18779428 | 18779428 | A        | G      | ncRNA_exonic | GGT3P      | NA                | NA                                                                                            | NA          | rs111623219 | NA |
| chr22 | 19025396 | 19025396 | T        | G      | UTR3         | DGCR2      | NA                | NA                                                                                            | NA          | NA          | NA |
| chr22 | 19025446 | 19025446 | T        | C      | UTR3         | DGCR2      | NA                | NA                                                                                            | NA          | NA          | NA |
| chr22 | 19511925 | 19511925 | G        | A      | exonic       | CLDN5      | stopgain SNV      | M_001130861:exon1:c.C109T:p.Q37X,CLDN5:NM_003277:exon2:c.C10                                  | NA          | rs885985    | NA |
| chr22 | 20098887 | 20098887 | C        | T      | UTR3         | DGCR8      | NA                | NA                                                                                            | NA          | NA          | NA |
| chr22 | 20387276 | 20387276 | A        | G      | ncRNA_exonic | PI4KAP1    | NA                | NA                                                                                            | NA          | rs2629350   | NA |
| chr22 | 20390444 | 20390444 | A        | G      | ncRNA_exonic | PI4KAP1    | NA                | NA                                                                                            | NA          | rs1892850   | NA |
| chr22 | 20394526 | 20394526 | C        | T      | ncRNA_exonic | PI4KAP1    | NA                | NA                                                                                            | NA          | rs201289136 | NA |
| chr22 | 21242600 | 21242603 | CACA     | -      | UTR3         | SNAP29     | NA                | NA                                                                                            | NA          | rs34474453  | NA |
| chr22 | 21244940 | 21244940 | A        | G      | UTR3         | SNAP29     | NA                | NA                                                                                            | NA          | rs165739    | NA |
| chr22 | 21327589 | 21327589 | C        | T      | exonic       | AIFM3      | nonsynonymous SNV | AIFM3:NM_001146288:exon3:c.C43T:p.P15S                                                        | NA          | rs178264    | NA |
| chr22 | 21369454 | 21369454 | A        | G      | UTR5         | P2RX6      | NA                | NA                                                                                            | NA          | rs71314758  | NA |
| chr22 | 21638109 | 21638109 | A        | G      | ncRNA_exonic | POM121L8P  | NA                | NA                                                                                            | NA          | rs199883726 | NA |
| chr22 | 21641886 | 21641886 | G        | A      | ncRNA_exonic | POM121L8P  | NA                | NA                                                                                            | NA          | rs60992581  | NA |

|       |          |          |           |      |              |            |                        |                                                                                                                     |                                  |             |    |
|-------|----------|----------|-----------|------|--------------|------------|------------------------|---------------------------------------------------------------------------------------------------------------------|----------------------------------|-------------|----|
| chr22 | 21649456 | 21649456 | G         | A    | ncRNA_exonic | POM121L8P  | NA                     | NA                                                                                                                  | NA                               | rs111255493 | NA |
| chr22 | 21649845 | 21649845 | A         | -    | ncRNA_exonic | POM121L8P  | NA                     | NA                                                                                                                  | NA                               | NA          | NA |
| chr22 | 21650235 | 21650235 | G         | A    | ncRNA_exonic | POM121L8P  | NA                     | NA                                                                                                                  | NA                               | rs478288    | NA |
| chr22 | 21650770 | 21650770 | C         | T    | ncRNA_exonic | POM121L8P  | NA                     | NA                                                                                                                  | NA                               | rs680955    | NA |
| chr22 | 21802007 | 21802007 | T         | G    | UTR3         | HIC2       | NA                     | NA                                                                                                                  | NA                               | NA          | NA |
| chr22 | 21802070 | 21802070 | -         | GT   | UTR3         | HIC2       | NA                     | NA                                                                                                                  | NA                               | rs142556171 | NA |
| chr22 | 22054753 | 22054753 | A         | C    | UTR3         | YPEL1      | NA                     | NA                                                                                                                  | NA                               | NA          | NA |
| chr22 | 22054764 | 22054764 | -         | T    | UTR3         | YPEL1      | NA                     | NA                                                                                                                  | NA                               | NA          | NA |
| chr22 | 23733547 | 23733547 | T         | -    | ncRNA_exonic | ZDHC8P1    | NA                     | NA                                                                                                                  | NA                               | rs11326923  | NA |
| chr22 | 23736180 | 23736180 | C         | T    | ncRNA_exonic | ZDHC8P1    | NA                     | NA                                                                                                                  | NA                               | rs5759766   | NA |
| chr22 | 24084365 | 24084365 | G         | T    | UTR3         | ZNF70      | NA                     | NA                                                                                                                  | NA                               | NA          | NA |
| chr22 | 24314006 | 24314006 | G         | T    | UTR3         | DDTL       | NA                     | NA                                                                                                                  | NA                               | rs1006771   | NA |
| chr22 | 24314132 | 24314132 | T         | C    | UTR3         | DDTL       | NA                     | NA                                                                                                                  | NA                               | NA          | NA |
| chr22 | 24314182 | 24314182 | A         | G    | UTR3         | DDTL       | NA                     | NA                                                                                                                  | NA                               | NA          | NA |
| chr22 | 24657678 | 24657678 | T         | C    | ncRNA_exonic | POM121L9P  | NA                     | NA                                                                                                                  | NA                               | NA          | NA |
| chr22 | 24657714 | 24657714 | C         | G    | ncRNA_exonic | POM121L9P  | NA                     | NA                                                                                                                  | NA                               | rs80002636  | NA |
| chr22 | 24660060 | 24660060 | C         | A    | ncRNA_exonic | POM121L9P  | NA                     | NA                                                                                                                  | NA                               | NA          | NA |
| chr22 | 24981608 | 24981608 | T         | G    | UTR3         | FAM211B    | NA                     | NA                                                                                                                  | NA                               | NA          | NA |
| chr22 | 24981657 | 24981657 | A         | C    | UTR3         | FAM211B    | NA                     | NA                                                                                                                  | NA                               | NA          | NA |
| chr22 | 25016442 | 25016442 | C         | T    | exonic       | GGT1       | nonsynonymous SNV      | V_001032365:exon8:c.C530T;p.A177V,GGT1:NM_005265:exon8:c.C530T;COSM1130481;OCCURENCE=1(prostat                      | rs3895576                        | B           |    |
| chr22 | 25023441 | 25023441 | C         | T    | exonic       | GGT1       | nonsynonymous SNV      | 001032365:exon12:c.C1063T;p.R355W,GGT1:NM_005265:exon12:c.C1063T;COSM1130481;OCCURENCE=1(prostat                    | rs200419006                      | B           |    |
| chr22 | 25023459 | 25023459 | G         | A    | exonic       | GGT1       | nonsynonymous SNV      | 001032365:exon12:c.G1081A;p.D361N,GGT1:NM_005265:exon12:c.G1081A;COSM1130481;OCCURENCE=1(prostat                    | rs138813205                      | B           |    |
| chr22 | 25041202 | 25041202 | T         | A    | ncRNA_exonic | POM121L10P | NA                     | NA                                                                                                                  | NA                               | rs1055003   | NA |
| chr22 | 25042640 | 25042640 | G         | T    | ncRNA_exonic | POM121L10P | NA                     | NA                                                                                                                  | NA                               | rs62231246  | NA |
| chr22 | 25043061 | 25043061 | -         | CCGG | ncRNA_exonic | POM121L10P | NA                     | NA                                                                                                                  | NA                               | NA          | NA |
| chr22 | 25603245 | 25603245 | C         | G    | UTR3         | CRYBB3     | NA                     | NA                                                                                                                  | NA                               | rs79515519  | NA |
| chr22 | 26120084 | 26120084 | -         | AC   | UTR3         | ADRBK2     | NA                     | NA                                                                                                                  | NA                               | NA          | NA |
| chr22 | 26122880 | 26122880 | GT        | -    | UTR3         | ADRBK2     | NA                     | NA                                                                                                                  | NA                               | NA          | NA |
| chr22 | 26839586 | 26839586 | A         | -    | UTR3         | ASPHD2     | NA                     | NA                                                                                                                  | NA                               | NA          | NA |
| chr22 | 26840194 | 26840194 | T         | -    | UTR3         | ASPHD2     | NA                     | NA                                                                                                                  | NA                               | NA          | NA |
| chr22 | 26847961 | 26847972 | CGCGCGCG  | -    | UTR3         | HPS4       | NA                     | NA                                                                                                                  | NA                               | NA          | NA |
| chr22 | 27066566 | 27066569 | AAAA      | -    | ncRNA_exonic | MIAT       | NA                     | NA                                                                                                                  | NA                               | NA          | NA |
| chr22 | 27067794 | 27067794 | A         | -    | ncRNA_exonic | MIAT       | NA                     | NA                                                                                                                  | NA                               | NA          | NA |
| chr22 | 28146770 | 28146770 | A         | G    | UTR3         | MN1        | NA                     | NA                                                                                                                  | NA                               | rs28501997  | NA |
| chr22 | 29754944 | 29754944 | T         | G    | exonic       | AP1B1      | nonsynonymous SNV      | 36C:p.N99T,AP1B1:NM_001166019:exon5:c.A296C;p.N99T,AP1B1:NM_001166019:exon5:c.A296C;COSM1130481;OCCURENCE=1(prostat | NA                               | D           |    |
| chr22 | 30092040 | 30092040 | A         | C    | UTR3         | NF2        | NA                     | NA                                                                                                                  | NA                               | NA          | NA |
| chr22 | 30092785 | 30092785 | T         | -    | UTR3         | NF2        | NA                     | NA                                                                                                                  | NA                               | NA          | NA |
| chr22 | 30093556 | 30093556 | T         | -    | UTR3         | NF2        | NA                     | NA                                                                                                                  | NA                               | rs113760386 | NA |
| chr22 | 30422037 | 30422037 | -         | T    | UTR3         | MTMR3      | NA                     | NA                                                                                                                  | NA                               | NA          | NA |
| chr22 | 30951320 | 30951320 | T         | G    | exonic       | GAL3ST1    | nonsynonymous SNV      | GAL3ST1:NM_004861:exon4:c.A892C;p.T298P                                                                             | NA                               | D           |    |
| chr22 | 31043406 | 31043406 | T         | G    | UTR3         | SLC35E4    | NA                     | NA                                                                                                                  | NA                               | NA          | NA |
| chr22 | 31303442 | 31303442 | C         | A    | UTR3         | OSBP2      | NA                     | NA                                                                                                                  | NA                               | NA          | NA |
| chr22 | 31322642 | 31322642 | G         | A    | UTR3         | MORC2      | NA                     | NA                                                                                                                  | NA                               | NA          | NA |
| chr22 | 32875190 | 32875190 | G         | A    | exonic       | FBXO7      | nonsynonymous SNV      | G108A:p.M36I,FBXO7:NM_001257990:exon2:c.G3A;p.M1I,FBXO7:NM_001257990:exon2:c.G3A;COSM1130481;OCCURENCE=1(prostat    | rs11107                          | B           |    |
| chr22 | 33256901 | 33256902 | TT        | -    | UTR3         | TIMP3      | NA                     | NA                                                                                                                  | NA                               | rs60978089  | NA |
| chr22 | 36139978 | 36139978 | T         | -    | UTR3         | RBFOX2     | NA                     | NA                                                                                                                  | NA                               | rs71658610  | NA |
| chr22 | 36623362 | 36623362 | A         | -    | UTR3         | APOL2      | NA                     | NA                                                                                                                  | NA                               | NA          | NA |
| chr22 | 37769479 | 37769479 | A         | C    | exonic       | ELFN2      | nonsynonymous SNV      | ELFN2:NM_052906:exon3:c.T2096G;p.V699G                                                                              | NA                               | D           |    |
| chr22 | 37769491 | 37769491 | T         | G    | exonic       | ELFN2      | nonsynonymous SNV      | ELFN2:NM_052906:exon3:c.A2084C;p.H695P                                                                              | NA                               | D           |    |
| chr22 | 37962312 | 37962312 | G         | C    | UTR5         | CDC42EP1   | NA                     | NA                                                                                                                  | NA                               | NA          | NA |
| chr22 | 38120176 | 38120178 | CCT       | -    | exonic       | TRIOBP     | nonframeshift deletion | TRIOBP:NM_001039141:exon7:c.1613_1615del:p.538_539del                                                               | ID=COSM111672;OCCURENCE=1(ovary) | rs146565844 | NA |
| chr22 | 38121740 | 38121740 | A         | C    | exonic       | TRIOBP     | synonymous SNV         | TRIOBP:NM_001039141:exon7:c.A3177C;p.I1059I                                                                         | NA                               | NA          |    |
| chr22 | 38170309 | 38170309 | A         | C    | UTR3         | TRIOBP     | NA                     | NA                                                                                                                  | NA                               | NA          | NA |
| chr22 | 38170313 | 38170313 | T         | C    | UTR3         | TRIOBP     | NA                     | NA                                                                                                                  | NA                               | NA          | NA |
| chr22 | 38482353 | 38482394 | 5CCATCCCA | -    | exonic       | BAIAP2L2   | nonframeshift deletion | BAIAP2L2:NM_025045:exon12:c.1322_1363del:p.441_455del                                                               | NA                               | NA          | NA |
| chr22 | 38687872 | 38687872 | G         | T    | UTR3         | CSNK1E     | NA                     | NA                                                                                                                  | NA                               | NA          | NA |
| chr22 | 38881822 | 38881822 | -         | A    | UTR3         | DDX17      | NA                     | NA                                                                                                                  | NA                               | rs35742916  | NA |
| chr22 | 39214774 | 39214774 | G         | T    | UTR3         | NPTXR      | NA                     | NA                                                                                                                  | NA                               | rs7288826   | NA |
| chr22 | 39428595 | 39428596 | TT        | -    | UTR3         | APOBEC3D   | NA                     | NA                                                                                                                  | NA                               | NA          | NA |
| chr22 | 39428750 | 39428750 | A         | C    | UTR3         | APOBEC3D   | NA                     | NA                                                                                                                  | NA                               | NA          | NA |
| chr22 | 40719728 | 40719728 | T         | G    | UTR3         | TNRC6B     | NA                     | NA                                                                                                                  | NA                               | NA          | NA |
| chr22 | 40720294 | 40720294 | -         | T    | UTR3         | TNRC6B     | NA                     | NA                                                                                                                  | NA                               | NA          | NA |
| chr22 | 40727650 | 40727652 | TTT       | -    | UTR3         | TNRC6B     | NA                     | NA                                                                                                                  | NA                               | NA          | NA |
| chr22 | 41855923 | 41855923 | A         | C    | UTR3         | PHF5A      | NA                     | NA                                                                                                                  | NA                               | rs61211718  | NA |
| chr22 | 42470317 | 42470317 | T         | C    | UTR5         | FAM109B    | NA                     | NA                                                                                                                  | NA                               | rs13057094  | NA |
| chr22 | 42524323 | 42524323 | A         | G    | exonic       | CYP2D6     | synonymous SNV         | _001025161:exon4:c.T543C;p.H181H,CYP2D6:NM_000106:exon5:c.T61C;COSM1130481;OCCURENCE=1(prostat                      | rs150518553                      | NA          |    |

|       |          |          |            |          |                |                             |                   |                                                               |                                   |             |    |
|-------|----------|----------|------------|----------|----------------|-----------------------------|-------------------|---------------------------------------------------------------|-----------------------------------|-------------|----|
| chr22 | 44276171 | 44276171 | T          | G        | UTR3           | PNPLA5                      | NA                | NA                                                            | NA                                | rs470093    | NA |
| chr22 | 44708655 | 44708655 | T          | C        | UTR5           | KIAA1644                    | NA                | NA                                                            | NA                                | rs7510924   | NA |
| chr22 | 45583065 | 45583065 | A          | -        | UTR3           | NUP50                       | NA                | NA                                                            | NA                                | rs201638442 | NA |
| chr22 | 45592689 | 45592689 | T          | G        | UTR3           | KIAA0930                    | NA                | NA                                                            | NA                                | NA          | NA |
| chr22 | 45996713 | 45996713 | T          | -        | UTR3           | FBLN1                       | NA                | NA                                                            | NA                                | NA          | NA |
| chr22 | 46436144 | 46436144 | T          | -        | ncRNA_exonic   | LOC100271722                | NA                | NA                                                            | NA                                | NA          | NA |
| chr22 | 46633508 | 46633508 | A          | -        | UTR3           | PPARA                       | NA                | NA                                                            | NA                                | NA          | NA |
| chr22 | 46638629 | 46638630 | CA         | -        | UTR3           | PPARA                       | NA                | NA                                                            | NA                                | NA          | NA |
| chr22 | 50659471 | 50659471 | A          | G        | exonic         | TUBGCP6                     | nonsynonymous SNV | TUBGCP6:NM_020461:exon16:c.T3317C:p.I1106T                    | NA                                | NA          | B  |
| chr22 | 50882753 | 50882753 | T          | -        | UTR3           | PPP6R2                      | NA                | NA                                                            | NA                                | rs59017944  | NA |
| chr22 | 50884801 | 50884801 | G          | -        | UTR3           | SBF1                        | NA                | NA                                                            | NA                                | NA          | NA |
| chr22 | 50884814 | 50884814 | A          | C        | UTR3           | SBF1                        | NA                | NA                                                            | NA                                | NA          | NA |
| chr22 | 50969668 | 50969668 | T          | A        | exonic         | ODF3B                       | nonsynonymous SNV | ODF3B:NM_001014440:exon4:c.A370T:p.T124S                      | NA                                | NA          | B  |
| chr22 | 50969670 | 50969670 | T          | A        | exonic         | ODF3B                       | nonsynonymous SNV | ODF3B:NM_001014440:exon4:c.A368T:p.H123L                      | NA                                | NA          | D  |
| chr22 | 51020668 | 51020668 | C          | A        | ncRNA_intronic | CHKB-CPT1B                  | NA                | NA                                                            | NA                                | rs86337     | NA |
| chrX  | 2822945  | 2822945  | T          | -        | UTR3           | ARSD                        | NA                | NA                                                            | NA                                | rs60974016  | NA |
| chrX  | 2824178  | 2824178  | T          | -        | UTR3           | ARSD                        | NA                | NA                                                            | NA                                | rs71883506  | NA |
| chrX  | 3523054  | 3523055  | AC         | -        | UTR3           | PRKX                        | NA                | NA                                                            | NA                                | NA          | NA |
| chrX  | 6145855  | 6145855  | C          | G        | UTR5           | NLGN4X                      | NA                | NA                                                            | NA                                | rs2290488   | NA |
| chrX  | 7023835  | 7023835  | G          | A        | exonic         | HDHD1                       | nonsynonymous SNV | 4_001178136:exon2:c.C106T:p.R36C,HDHD1:NM_012080:exon2:c.C10  | NA                                | NA          | NA |
| chrX  | 7867727  | 7867727  | T          | C        | UTR3           | PNPLA4                      | NA                | NA                                                            | NA                                | rs191932908 | NA |
| chrX  | 7867732  | 7867732  | A          | G        | UTR3           | PNPLA4                      | NA                | NA                                                            | NA                                | rs6639976   | NA |
| chrX  | 8433461  | 8433461  | T          | C        | UTR5           | VCX3B                       | NA                | NA                                                            | COSN414126;OCCURENCE=1(urinary_tr | rs200308612 | NA |
| chrX  | 11129475 | 11129475 | -          | GGC      | UTR5           | HCCS                        | NA                | NA                                                            | NA                                | rs35297358  | NA |
| chrX  | 13731474 | 13731474 | A          | G        | UTR3           | TRAPPC2                     | NA                | NA                                                            | NA                                | rs5979952   | NA |
| chrX  | 16859628 | 16859628 | G          | A        | exonic         | TXLNG                       | synonymous SNV    | 01168683:exon8:c.G930A:p.Q310Q,TXLNG:NM_018360:exon10:c.G13   | NA                                | rs5924530   | NA |
| chrX  | 18910862 | 18910862 | T          | -        | ncRNA_UTR3     | PHKA2                       | NA                | NA                                                            | NA                                | NA          | NA |
| chrX  | 20005366 | 20005366 | G          | A        | ncRNA_exonic   | LOC729609                   | NA                | NA                                                            | NA                                | NA          | NA |
| chrX  | 20145719 | 20145719 | G          | A        | UTR3           | EIF1AX                      | NA                | NA                                                            | NA                                | rs6527969   | NA |
| chrX  | 23801311 | 23801311 | C          | T        | UTR5           | SAT1                        | NA                | NA                                                            | NA                                | rs11550721  | NA |
| chrX  | 24095043 | 24095043 | C          | -        | UTR3           | EIF2S3                      | NA                | NA                                                            | NA                                | NA          | NA |
| chrX  | 24382429 | 24382429 | C          | G        | exonic         | SUPT20HL1                   | nonsynonymous SNV | SUPT20HL1:NM_001136234:exon1:c.C1552G:p.P518A                 | NA                                | rs113091397 | NA |
| chrX  | 24382435 | 24382435 | C          | G        | exonic         | SUPT20HL1                   | nonsynonymous SNV | SUPT20HL1:NM_001136234:exon1:c.C1558G:p.P520A                 | NA                                | NA          | NA |
| chrX  | 24577435 | 24577435 | A          | -        | UTR3           | PCYT1B                      | NA                | NA                                                            | NA                                | rs56367400  | NA |
| chrX  | 24577537 | 24577537 | -          | AGAA     | UTR3           | PCYT1B                      | NA                | NA                                                            | NA                                | NA          | NA |
| chrX  | 24577574 | 24577574 | A          | G        | UTR3           | PCYT1B                      | NA                | NA                                                            | NA                                | rs55732431  | NA |
| chrX  | 28807442 | 28807442 | G          | A        | UTR5           | IL1RAPL1                    | NA                | NA                                                            | 14057,COSN414056;OCCURENCE=2(urin | rs6526806   | NA |
| chrX  | 34148841 | 34148841 | A          | G        | exonic         | FAM47A                      | nonsynonymous SNV | FAM47A:NM_203408:exon1:c.T1555C:p.S519P                       | NA                                | NA          | B  |
| chrX  | 34148844 | 34148844 | G          | C        | exonic         | FAM47A                      | nonsynonymous SNV | FAM47A:NM_203408:exon1:c.C1552G:p.R518G                       | NA                                | rs17855514  | B  |
| chrX  | 34148877 | 34148877 | C          | G        | exonic         | FAM47A                      | nonsynonymous SNV | FAM47A:NM_203408:exon1:c.G1519C:p.E507Q                       | rs5973088                         | P           |    |
| chrX  | 34148882 | 34148882 | C          | T        | exonic         | FAM47A                      | nonsynonymous SNV | FAM47A:NM_203408:exon1:c.G1514A:p.R505H                       | rs5973089                         | B           |    |
| chrX  | 37027745 | 37027745 | T          | C        | exonic         | FAM47C                      | nonsynonymous SNV | FAM47C:NM_001013736:exon1:c.T1262C:p.I421T                    | NA                                | NA          | NA |
| chrX  | 37028026 | 37028026 | T          | C        | exonic         | FAM47C                      | nonsynonymous SNV | FAM47C:NM_001013736:exon1:c.T1543C:p.S515P                    | rs141294322                       | NA          | NA |
| chrX  | 37028094 | 37028094 | A          | G        | exonic         | FAM47C                      | synonymous SNV    | FAM47C:NM_001013736:exon1:c.A1611G:p.A537A                    | NA                                | NA          | NA |
| chrX  | 37028645 | 37028645 | G          | C        | exonic         | FAM47C                      | nonsynonymous SNV | FAM47C:NM_001013736:exon1:c.G2162C:p.S721T                    | NA                                | NA          | NA |
| chrX  | 37672462 | 37672462 | T          | -        | UTR3           | CYBB                        | NA                | NA                                                            | NA                                | rs11338914  | NA |
| chrX  | 46407207 | 46407207 | A          | G        | ncRNA_exonic   | ZNF674-AS1                  | NA                | NA                                                            | NA                                | rs5905550   | NA |
| chrX  | 46940123 | 46940123 | A          | G        | UTR5           | RGN                         | NA                | NA                                                            | NA                                | NA          | NA |
| chrX  | 47341999 | 47341999 | -          | CGTGCGCG | UTR5           | ZNF41                       | NA                | NA                                                            | NA                                | NA          | NA |
| chrX  | 48206014 | 48206023 | iTGTTGTGTC | -        | UTR3           | SSX3                        | NA                | NA                                                            | NA                                | rs72172699  | NA |
| chrX  | 48382099 | 48382099 | -          | T        | UTR5           | EBP                         | NA                | NA                                                            | NA                                | NA          | NA |
| chrX  | 48567295 | 48567295 | A          | G        | UTR3           | SUV39H1                     | NA                | NA                                                            | NA                                | rs3373      | NA |
| chrX  | 48770831 | 48770831 | -          | A        | UTR3           | PIM2                        | NA                | NA                                                            | NA                                | NA          | NA |
| chrX  | 48770852 | 48770852 | G          | A        | UTR3           | PIM2                        | NA                | NA                                                            | NA                                | NA          | NA |
| chrX  | 48847497 | 48847497 | T          | C        | exonic         | GRIPAP1                     | synonymous SNV    | V_207672:exon6:c.A324G;p.E108E,GRIPAP1:NM_020137:exon7:c.A48  | NA                                | rs11545861  | NA |
| chrX  | 48922629 | 48922629 | G          | A        | exonic         | CCDC120                     | nonsynonymous SNV | _001163323:exon7:c.G646A;p.E216K,CCDC120:NM_001271835:exon7   | NA                                | NA          | P  |
| chrX  | 49107557 | 49107557 | C          | G        | UTR3           | FOXP3                       | NA                | NA                                                            | NA                                | NA          | NA |
| chrX  | 49107563 | 49107563 | T          | G        | UTR3           | FOXP3                       | NA                | NA                                                            | NA                                | NA          | NA |
| chrX  | 49113939 | 49113939 | T          | G        | exonic         | FOXP3                       | synonymous SNV    | I_001114377:exon3:c.A294C:p.P98P,FOXP3:NM_014009:exon4:c.A39C | NA                                | NA          | NA |
| chrX  | 49113976 | 49113976 | T          | G        | exonic         | FOXP3                       | nonsynonymous SNV | _001114377:exon3:c.A257C:p.H86P,FOXP3:NM_014009:exon4:c.A362  | NA                                | NA          | P  |
| chrX  | 51150629 | 51150629 | A          | C        | intergenic     | l0(dist=70252),NUDT11(dist= | NA                | NA                                                            | NA                                | NA          | D  |
| chrX  | 53222050 | 53222050 | T          | C        | UTR3           | KDM5C                       | NA                | NA                                                            | NA                                | NA          | NA |
| chrX  | 53279837 | 53279837 | C          | G        | exonic         | IQSEC2                      | nonsynonymous SNV | 001111125:exon5:c.G1921C:p.A641P,IQSEC2:NM_015075:exon5:c.G15 | NA                                | NA          | P  |
| chrX  | 54224161 | 54224161 | A          | -        | UTR3           | WNK3                        | NA                | NA                                                            | NA                                | NA          | NA |
| chrX  | 54466901 | 54466901 | T          | G        | exonic         | TSR2                        | nonsynonymous SNV | TSR2:NM_058163:exon1:c.T47G:p.V16G                            | NA                                | NA          | D  |
| chrX  | 54497147 | 54497147 | T          | G        | exonic         | FGD1                        | synonymous SNV    | FGD1:NM_004463:exon3:c.A528C:p.P176P                          | NA                                | NA          | NA |

|      |          |          |          |          |              |           |                        |                                                               |                                 |             |    |
|------|----------|----------|----------|----------|--------------|-----------|------------------------|---------------------------------------------------------------|---------------------------------|-------------|----|
| chrX | 54587505 | 54587505 | A        | -        | UTR3         | GNL3L     | NA                     | NA                                                            | NA                              | NA          | NA |
| chrX | 62857727 | 62857728 | TG       | -        | UTR3         | ARHGEF9   | NA                     | NA                                                            | NA                              | rs10542660  | NA |
| chrX | 68061228 | 68061228 | -        | C        | UTR3         | EFNB1     | NA                     | NA                                                            | NA                              | NA          | NA |
| chrX | 69260733 | 69260733 | A        | G        | UTR3         | AWAT2     | NA                     | NA                                                            | NA                              | rs151003736 | NA |
| chrX | 70798076 | 70798076 | A        | G        | ncRNA_UTR5   | ACRC      | NA                     | NA                                                            | NA                              | NA          | NA |
| chrX | 71347480 | 71347480 | -        | AGAATAGC | UTR3         | RGAG4     | NA                     | NA                                                            | NA                              | NA          | NA |
| chrX | 73014138 | 73014142 | AAGGT    | -        | ncRNA_exonic | TSIX      | NA                     | NA                                                            | NA                              | rs201154934 | NA |
| chrX | 73037456 | 73037456 | G        | A        | ncRNA_exonic | TSIX      | NA                     | NA                                                            | NA                              | NA          | NA |
| chrX | 73289498 | 73289498 | G        | A        | ncRNA_exonic | JPX       | NA                     | NA                                                            | NA                              | NA          | NA |
| chrX | 73641221 | 73641221 | T        | G        | upstream     | SLC16A2   | NA                     | NA                                                            | NA                              | NA          | NA |
| chrX | 75648999 | 75648999 | G        | C        | exonic       | MAGEE1    | nonsynonymous SNV      | MAGEE1:NM_020932:exon1:c.G676C:p.A226P                        | NA                              | NA          | B  |
| chrX | 83591866 | 83591866 | C        | T        | exonic       | HDX       | synonymous SNV         | 09A:p.P503P,HDX:NM_144657:exon7:c.G1683A:p.P561P,HDX:NM_00    | NA                              | rs5922966   | NA |
| chrX | 84343158 | 84343161 | ATAC     | -        | UTR3         | APOOL     | NA                     | NA                                                            | NA                              | NA          | NA |
| chrX | 85118101 | 85118101 | T        | -        | UTR3         | CHM       | NA                     | NA                                                            | NA                              | NA          | NA |
| chrX | 85225107 | 85225107 | -        | A        | UTR3         | CHM       | NA                     | NA                                                            | NA                              | rs199510529 | NA |
| chrX | 91089881 | 91089881 | C        | G        | UTR5         | PCDH11X   | NA                     | NA                                                            | NA                              | rs3795211   | NA |
| chrX | 1E+08    | 1E+08    | -        | A        | UTR3         | TMEM35    | NA                     | NA                                                            | NA                              | NA          | NA |
| chrX | 1.01E+08 | 1.01E+08 | G        | C        | exonic       | ARMCX2    | nonsynonymous SNV      | NM_014782:exon5:c.C53G:p.A18G,ARMCX2:NM_177949:exon6:c.C53    | NA                              | NA          | B  |
| chrX | 1.01E+08 | 1.01E+08 | T        | C        | exonic       | ARMCX2    | nonsynonymous SNV      | :NM_014782:exon5:c.A40G:p.I14V,ARMCX2:NM_177949:exon6:c.A40   | NA                              | rs200580160 | B  |
| chrX | 1.01E+08 | 1.01E+08 | -        | T        | UTR5         | BEX5      | NA                     | NA                                                            | NA                              | NA          | NA |
| chrX | 1.03E+08 | 1.03E+08 | G        | T        | UTR3         | TCEAL7    | NA                     | NA                                                            | NA                              | NA          | NA |
| chrX | 1.03E+08 | 1.03E+08 | G        | C        | exonic       | ESX1      | nonsynonymous SNV      | ESX1:NM_153448:exon4:c.C1042G:p.L348V                         | ID=COSM226883;OCCURENCE=1(skin) | rs76090537  | NA |
| chrX | 1.03E+08 | 1.03E+08 | C        | G        | exonic       | ESX1      | nonsynonymous SNV      | ESX1:NM_153448:exon4:c.G907C:p.V303L                          | NA                              | NA          | NA |
| chrX | 1.03E+08 | 1.03E+08 | A        | C        | exonic       | ESX1      | nonsynonymous SNV      | ESX1:NM_153448:exon4:c.T889G:p.W297G                          | NA                              | NA          | NA |
| chrX | 1.06E+08 | 1.06E+08 | -        | GA       | UTR3         | MORC4     | NA                     | NA                                                            | NA                              | NA          | NA |
| chrX | 1.1E+08  | 1.1E+08  | GAGG     | -        | UTR3         | CHRD1     | NA                     | NA                                                            | NA                              | rs71931043  | NA |
| chrX | 1.11E+08 | 1.11E+08 | T        | -        | UTR3         | DCX       | NA                     | NA                                                            | NA                              | NA          | NA |
| chrX | 1.14E+08 | 1.14E+08 | G        | A        | exonic       | RBMXL3    | nonsynonymous SNV      | RBMXL3:NM_001145346:exon1:c.G1192A:p.D398N                    | NA                              | rs12399211  | NA |
| chrX | 1.16E+08 | 1.16E+08 | T        | -        | UTR3         | SLC6A14   | NA                     | NA                                                            | NA                              | rs202199898 | NA |
| chrX | 1.19E+08 | 1.19E+08 | G        | A        | exonic       | CXorf56   | synonymous SNV         | 3T:p.G111G,CXorf56:NM_001170569:exon4:c.C228T:p.G76G,CXorf56: | NA                              | rs5910611   | NA |
| chrX | 1.19E+08 | 1.19E+08 | GT       | -        | UTR3         | 6-Sep     | NA                     | NA                                                            | NA                              | NA          | NA |
| chrX | 1.19E+08 | 1.19E+08 | TT       | -        | UTR3         | 6-Sep     | NA                     | NA                                                            | NA                              | NA          | NA |
| chrX | 1.19E+08 | 1.19E+08 | T        | -        | UTR3         | ZBTB33    | NA                     | NA                                                            | NA                              | NA          | NA |
| chrX | 1.2E+08  | 1.2E+08  | GTGT     | -        | UTR3         | MCTS1     | NA                     | NA                                                            | NA                              | NA          | NA |
| chrX | 1.23E+08 | 1.23E+08 | T        | G        | UTR3         | XIAP      | NA                     | NA                                                            | NA                              | rs28382747  | NA |
| chrX | 1.23E+08 | 1.23E+08 | C        | A        | UTR3         | XIAP      | NA                     | NA                                                            | NA                              | rs28382751  | NA |
| chrX | 1.23E+08 | 1.23E+08 | -        | T        | UTR3         | XIAP      | NA                     | NA                                                            | NA                              | rs58114044  | NA |
| chrX | 1.23E+08 | 1.23E+08 | A        | T        | exonic       | STAG2     | nonsynonymous SNV      | 42749:exon22:c.A2124T:p.L708F,STAG2:NM_001042750:exon22:c.A2  | NA                              | NA          | B  |
| chrX | 1.31E+08 | 1.31E+08 | GA       | -        | UTR3         | RAP2C     | NA                     | NA                                                            | NA                              | NA          | NA |
| chrX | 1.34E+08 | 1.34E+08 | T        | -        | ncRNA_exonic | LINC00087 | NA                     | NA                                                            | NA                              | NA          | NA |
| chrX | 1.35E+08 | 1.35E+08 | C        | A        | UTR3         | CT45A1    | NA                     | NA                                                            | NA                              | rs1064036   | NA |
| chrX | 1.35E+08 | 1.35E+08 | G        | A        | UTR3         | CT45A1    | NA                     | NA                                                            | NA                              | rs1064037   | NA |
| chrX | 1.35E+08 | 1.35E+08 | GAT      | -        | exonic       | GPR112    | nonframeshift deletion | GPR112:NM_153834:exon17:c.7966_7968del:p.2656_2656del         | NA                              | rs34255702  | NA |
| chrX | 1.36E+08 | 1.36E+08 | G        | A        | UTR3         | RBMX      | NA                     | NA                                                            | NA                              | rs850       | NA |
| chrX | 1.4E+08  | 1.4E+08  | G        | C        | UTR5         | LDOC1     | NA                     | NA                                                            | NA                              | rs2038375   | NA |
| chrX | 1.41E+08 | 1.41E+08 | C        | G        | exonic       | MAGEC1    | synonymous SNV         | MAGEC1:NM_005462:exon4:c.C513G:p.S171S                        | NA                              | rs75782140  | NA |
| chrX | 1.41E+08 | 1.41E+08 | G        | C        | exonic       | MAGEC1    | nonsynonymous SNV      | MAGEC1:NM_005462:exon4:c.G841C:p.V281L                        | NA                              | rs176044    | NA |
| chrX | 1.41E+08 | 1.41E+08 | G        | T        | exonic       | MAGEC1    | nonsynonymous SNV      | MAGEC1:NM_005462:exon4:c.G1130T:p.G377V                       | NA                              | rs7063168   | NA |
| chrX | 1.41E+08 | 1.41E+08 | A        | C        | exonic       | MAGEC1    | nonsynonymous SNV      | MAGEC1:NM_005462:exon4:c.A1272C:p.L424F                       | NA                              | rs56675069  | NA |
| chrX | 1.41E+08 | 1.41E+08 | A        | C        | exonic       | MAGEC1    | nonsynonymous SNV      | MAGEC1:NM_005462:exon4:c.A1358C:p.Y453S                       | NA                              | rs58117541  | NA |
| chrX | 1.45E+08 | 1.45E+08 | A        | T        | UTR3         | SLITRK2   | NA                     | NA                                                            | NA                              | NA          | NA |
| chrX | 1.48E+08 | 1.48E+08 | G        | A        | UTR3         | AFF2      | NA                     | NA                                                            | NA                              | rs144890448 | NA |
| chrX | 1.52E+08 | 1.52E+08 | G        | C        | ncRNA_UTR5   | MAGEA12   | NA                     | NA                                                            | NA                              | rs73639100  | NA |
| chrX | 1.52E+08 | 1.52E+08 | T        | C        | ncRNA_UTR5   | MAGEA12   | NA                     | NA                                                            | NA                              | rs2515675   | NA |
| chrX | 1.52E+08 | 1.52E+08 | C        | T        | UTR3         | PNMA5     | NA                     | NA                                                            | NA                              | NA          | NA |
| chrX | 1.52E+08 | 1.52E+08 | C        | T        | UTR3         | PNMA5     | NA                     | NA                                                            | NA                              | NA          | NA |
| chrX | 1.52E+08 | 1.52E+08 | C        | T        | UTR3         | PNMA5     | NA                     | NA                                                            | NA                              | NA          | NA |
| chrX | 1.52E+08 | 1.52E+08 | A        | G        | UTR3         | PNMA5     | NA                     | NA                                                            | NA                              | NA          | NA |
| chrX | 1.52E+08 | 1.52E+08 | A        | G        | UTR3         | PNMA5     | NA                     | NA                                                            | NA                              | NA          | NA |
| chrX | 1.52E+08 | 1.52E+08 | T        | C        | UTR5         | PNMA5     | NA                     | NA                                                            | NA                              | rs67383647  | NA |
| chrX | 1.53E+08 | 1.53E+08 | TCTCTCTC | -        | UTR3         | BGN       | NA                     | NA                                                            | NA                              | rs36205859  | NA |
| chrX | 1.53E+08 | 1.53E+08 | -        | G        | UTR3         | ATP2B3    | NA                     | NA                                                            | NA                              | rs144678509 | NA |
| chrX | 1.53E+08 | 1.53E+08 | T        | G        | UTR3         | ATP2B3    | NA                     | NA                                                            | NA                              | rs28706355  | NA |
| chrX | 1.53E+08 | 1.53E+08 | A        | C        | exonic       | PLXNB3    | synonymous SNV         | 5393:exon20:c.A3453C:p.A1151A,PLXNB3:NM_001163257:exon21:c.A  | NA                              | NA          | NA |
| chrX | 1.53E+08 | 1.53E+08 | C        | G        | exonic       | AVPR2     | synonymous SNV         | I_000054:exon2:c.C207G:p.G69G,AVPR2:NM_001146151:exon2:c.C20  | NA                              | NA          | NA |
| chrY | 5606261  | 5606261  | C        | G        | UTR3         | PCDH11Y   | NA                     | NA                                                            | NA                              | rs12559026  | NA |

---

|      |         |         |   |   |      |         |    |    |    |           |    |
|------|---------|---------|---|---|------|---------|----|----|----|-----------|----|
| chrY | 5607230 | 5607230 | G | C | UTR3 | PCDH11Y | NA | NA | NA | rs2556910 | NA |
| chrY | 5607799 | 5607799 | A | T | UTR3 | PCDH11Y | NA | NA | NA | NA        | NA |

---



| Transversion |          |          |     |     |              |              |                    |                                           |                                 |            |           |      |
|--------------|----------|----------|-----|-----|--------------|--------------|--------------------|-------------------------------------------|---------------------------------|------------|-----------|------|
| Chr          | Start    | End      | Ref | Alt | Func.refGene | Gene.refGene | ExonicFunc.refGene | AAChange.refGene                          | cosmic64                        | snp137     | PolyPhen2 | Pred |
| chr1         | 65901244 | 65901244 | G   | T   | UTR3         | LEPROT       | NA                 | NA                                        | NA                              | NA         | NA        | NA   |
| chr1         | 1.15E+08 | 1.15E+08 | G   | T   | exonic       | AMPD1        | synonymous SNV     | exon3:c.C322A:p.R108R,AMPD1:NM_000036:    | NA                              | NA         | NA        | NA   |
| chr1         | 1.21E+08 | 1.21E+08 | G   | T   | UTR5         | NOTCH2       | NA                 | NA                                        | NA                              | rs57122008 | NA        | NA   |
| chr1         | 2.37E+08 | 2.37E+08 | G   | T   | UTR3         | MTR          | NA                 | NA                                        | NA                              | NA         | NA        | NA   |
| chr2         | 46852206 | 46852206 | G   | T   | UTR3         | CRIP1        | NA                 | NA                                        | NA                              | NA         | NA        | NA   |
| chr2         | 92129614 | 92129614 | G   | T   | ncRNA_exonic | ACTR3BP2     | NA                 | NA                                        | NA                              | NA         | NA        | NA   |
| chr2         | 1.13E+08 | 1.13E+08 | G   | T   | UTR3         | ZC3H6        | NA                 | NA                                        | NA                              | NA         | NA        | NA   |
| chr2         | 2.2E+08  | 2.2E+08  | G   | T   | UTR3         | FAM134A      | NA                 | NA                                        | NA                              | NA         | NA        | NA   |
| chr3         | 67049615 | 67049615 | G   | T   | exonic       | KBTBD8       | nonsynonymous SNV  | KBTBD8:NM_032505:exon2:c.G227T:p.R76I     | NA                              | NA         | NA        | D    |
| chr3         | 1.05E+08 | 1.05E+08 | G   | T   | exonic       | CBLB         | nonsynonymous SNV  | CBLB:NM_170662:exon12:c.C1618A:p.Q540K    | NA                              | NA         | NA        | D    |
| chr3         | 1.5E+08  | 1.5E+08  | G   | T   | UTR3         | TSC22D2      | NA                 | NA                                        | NA                              | s20149715  | NA        | NA   |
| chr3         | 1.7E+08  | 1.7E+08  | G   | T   | UTR3         | CLDN11       | NA                 | NA                                        | NA                              | NA         | NA        | NA   |
| chr4         | 87567    | 87567    | G   | T   | UTR3         | ZNF595       | NA                 | NA                                        | NA                              | NA         | NA        | NA   |
| chr4         | 87574    | 87574    | G   | T   | UTR3         | ZNF595       | NA                 | NA                                        | NA                              | NA         | NA        | NA   |
| chr4         | 2087366  | 2087366  | G   | T   | exonic       | POLN         | nonsynonymous SNV  | POLN:NM_181808:exon19:c.C2171A:p.A724E    | NA                              | NA         | NA        | B    |
| chr4         | 1.39E+08 | 1.39E+08 | G   | T   | ncRNA_UTR3   | SLC7A11      | NA                 | NA                                        | NA                              | NA         | NA        | NA   |
| chr5         | 23521146 | 23521146 | G   | T   | exonic       | PRDM9        | synonymous SNV     | PRDM9:NM_020227:exon6:c.G366T:p.A122A     | NA                              | NA         | NA        | NA   |
| chr5         | 55168106 | 55168106 | G   | T   | exonic       | IL31RA       | nonsynonymous SNV  | 7:exon4:c.G281T:p.G94V,IL31RA:NM_139017:c | NA                              | NA         | NA        | B    |
| chr5         | 71503811 | 71503811 | G   | T   | UTR3         | MAP1B        | NA                 | NA                                        | NA                              | NA         | NA        | NA   |
| chr5         | 80738520 | 80738520 | G   | T   | exonic       | SSBP2        | nonsynonymous SNV  | exon12:c.C711A:p.N237K,SSBP2:NM_00125675: | NA                              | NA         | NA        | D    |
| chr5         | 1.41E+08 | 1.41E+08 | G   | T   | UTR3         | PCDHB9       | NA                 | NA                                        | NA                              | NA         | NA        | NA   |
| chr6         | 24775181 | 24775181 | G   | T   | UTR5         | GMNN         | NA                 | NA                                        | NA                              | rs2754775  | NA        | NA   |
| chr6         | 31324528 | 31324528 | G   | T   | exonic       | HLA-B        | nonsynonymous SNV  | HLA-B:NM_005514:exon2:c.C280A:p.Q94K      | NA                              | rs1071817  | NA        | NA   |
| chr6         | 49460762 | 49460762 | G   | T   | UTR3         | CENPQ        | NA                 | NA                                        | NA                              | NA         | NA        | NA   |
| chr6         | 57398207 | 57398207 | G   | T   | exonic       | PRIM2        | unknown            | UNKNOWN                                   | NA                              | rs71214816 | NA        | NA   |
| chr6         | 1.6E+08  | 1.6E+08  | G   | T   | UTR3         | WTAP         | NA                 | NA                                        | NA                              | NA         | NA        | NA   |
| chr6         | 1.6E+08  | 1.6E+08  | G   | T   | UTR3         | WTAP         | NA                 | NA                                        | NA                              | NA         | NA        | NA   |
| chr6         | 1.6E+08  | 1.6E+08  | G   | T   | UTR3         | WTAP         | NA                 | NA                                        | NA                              | NA         | NA        | NA   |
| chr6         | 1.6E+08  | 1.6E+08  | G   | T   | UTR3         | WTAP         | NA                 | NA                                        | NA                              | NA         | NA        | NA   |
| chr7         | 44258943 | 44258943 | G   | T   | UTR3         | CAMK2B       | NA                 | NA                                        | NA                              | rs74582205 | NA        | NA   |
| chr7         | 66774667 | 66774667 | G   | T   | ncRNA_exonic | STAG3L4      | NA                 | NA                                        | NA                              | NA         | NA        | NA   |
| chr7         | 77558429 | 77558429 | G   | T   | exonic       | PHTF2        | nonsynonymous SNV  | F2:NM_001127357:exon10:c.G1021T:p.A341S,  | NA                              | NA         | NA        | NA   |
| chr9         | 117998   | 117998   | G   | T   | exonic       | FOXD4        | nonsynonymous SNV  | FOXD4:NM_207305:exon1:c.C122A:p.A41E      | ID=COSM226644;OCCURENCE=1(skin) | rs66612967 | B         | NA   |
| chr9         | 1.02E+08 | 1.02E+08 | G   | T   | UTR3         | TGFBR1       | NA                 | NA                                        | NA                              | s19954527  | NA        | NA   |
| chr9         | 1.16E+08 | 1.16E+08 | G   | T   | UTR3         | SNX30        | NA                 | NA                                        | NA                              | s11341690  | NA        | NA   |
| chr9         | 1.36E+08 | 1.36E+08 | G   | T   | UTR5         | ADAMTSL2     | NA                 | NA                                        | NA                              | NA         | NA        | NA   |
| chr10        | 62544601 | 62544601 | G   | T   | exonic       | CDK1         | nonsynonymous SNV  | 407:exon3:c.G176T:p.R59L,CDK1:NM_001786:  | NA                              | NA         | NA        | B    |
| chr10        | 71267385 | 71267385 | G   | T   | UTR3         | TSPAN15      | NA                 | NA                                        | NA                              | NA         | NA        | NA   |
| chr10        | 1.02E+08 | 1.02E+08 | G   | T   | UTR3         | HIF1AN       | NA                 | NA                                        | NA                              | rs75780010 | NA        | NA   |
| chr10        | 1.02E+08 | 1.02E+08 | G   | T   | UTR3         | HIF1AN       | NA                 | NA                                        | NA                              | NA         | NA        | NA   |
| chr11        | 1.12E+08 | 1.12E+08 | G   | T   | UTR3         | C11orf57     | NA                 | NA                                        | NA                              | NA         | NA        | NA   |
| chr12        | 5021439  | 5021439  | G   | T   | exonic       | KCNA1        | nonsynonymous SNV  | KCNA1:NM_000217:exon2:c.G895T:p.V299F     | NA                              | NA         | NA        | D    |
| chr12        | 8927164  | 8927164  | G   | T   | UTR3         | RIMKLB       | NA                 | NA                                        | NA                              | NA         | NA        | NA   |
| chr12        | 11546258 | 11546258 | G   | T   | exonic       | PRB2         | nonsynonymous SNV  | PRB2:NM_006248:exon3:c.C754A:p.Q252K      | NA                              | NA         | NA        | NA   |
| chr12        | 52845665 | 52845665 | G   | T   | exonic       | KRT6B        | synonymous SNV     | KRT6B:NM_005555:exon1:c.C198A:p.G66G      | NA                              | s14111418  | NA        | NA   |
| chr12        | 56810470 | 56810470 | G   | T   | UTR3         | TIMELESS     | NA                 | NA                                        | NA                              | NA         | NA        | NA   |
| chr12        | 58146158 | 58146158 | G   | T   | UTR5         | CDK4         | NA                 | NA                                        | NA                              | NA         | NA        | NA   |
| chr12        | 58146161 | 58146161 | G   | T   | UTR5         | CDK4         | NA                 | NA                                        | NA                              | NA         | NA        | NA   |
| chr12        | 70214497 | 70214497 | G   | T   | UTR3         | RAB3IP       | NA                 | NA                                        | NA                              | rs11177881 | NA        | NA   |
| chr12        | 96361580 | 96361580 | G   | T   | exonic       | AMDHD1       | stopgain SNV       | AMDHD1:NM_152435:exon9:c.G1240T:p.E414)   | NA                              | NA         | NA        | NA   |
| chr13        | 49852512 | 49852512 | G   | T   | exonic       | CDADC1       | nonsynonymous SNV  | exon7:c.G1077T:p.M359I,CDADC1:NM_030911   | NA                              | NA         | NA        | D    |
| chr16        | 68678505 | 68678505 | G   | T   | UTR5         | CDH3         | NA                 | NA                                        | NA                              | NA         | NA        | NA   |
| chr17        | 11513845 | 11513845 | G   | T   | exonic       | DNAH9        | nonsynonymous SNV  | DNAH9:NM_001372:exon3:c.G747T:p.K249N     | NA                              | NA         | NA        | B    |
| chr17        | 45214606 | 45214606 | G   | T   | exonic       | CDC27        | nonsynonymous SNV  | con14:c.C1843A:p.H615N,CDC27:NM_001256:c  | NA                              | rs79260965 | NA        | NA   |
| chr17        | 77807715 | 77807715 | G   | T   | UTR3         | CBX4         | NA                 | NA                                        | NA                              | NA         | NA        | NA   |

|       |          |          |   |   |              |           |                   |                                                                               |                                      |            |    |
|-------|----------|----------|---|---|--------------|-----------|-------------------|-------------------------------------------------------------------------------|--------------------------------------|------------|----|
| chr19 | 199442   | 199442   | G | T | ncRNA_exonic | FLJ45445  | NA                | NA                                                                            | NA                                   | rs57399907 | NA |
| chr19 | 1597572  | 1597572  | G | T | UTR3         | UQCR11    | NA                | NA                                                                            | NA                                   | NA         | NA |
| chr19 | 43376101 | 43376101 | G | T | exonic       | PSG1      | nonsynonymous SNV | PSG1:NM_001184826:exon3:c.C527A:p.A176                                        | NA                                   | NA         | NA |
| chr19 | 54725798 | 54725798 | G | T | exonic       | LILRB3    | nonsynonymous SNV | LILRB3:NM_006864:exon4:c.C560A:p.T187N,LILRB3:NM_006864:exon4:c.C560A:p.T187N | ID=COSM1158374;OCCURENCE=1(pancreas) | rs1052968  | B  |
| chr20 | 25754782 | 25754782 | G | T | ncRNA_exonic | FAM182B   | NA                | NA                                                                            | NA                                   | NA         | NA |
| chr20 | 33098244 | 33098244 | G | T | UTR3         | ITCH      | NA                | NA                                                                            | NA                                   | NA         | NA |
| chr20 | 49367490 | 49367490 | G | T | UTR3         | PARD6B    | NA                | NA                                                                            | NA                                   | NA         | NA |
| chrX  | 19552343 | 19552343 | G | T | UTR3         | SH3KBP1   | NA                | NA                                                                            | NA                                   | NA         | NA |
| chrX  | 55478566 | 55478566 | G | T | UTR5         | MAGEH1    | NA                | NA                                                                            | NA                                   | NA         | NA |
| chr1  | 22357549 | 22357549 | G | T | ncRNA_exonic | LINC00339 | NA                | NA                                                                            | NA                                   | rs2473291  | NA |
| chr1  | 22418256 | 22418256 | G | T | UTR3         | CDC42     | NA                | NA                                                                            | NA                                   | NA         | NA |
| chr1  | 28087457 | 28087457 | G | T | UTR3         | FAM76A    | NA                | NA                                                                            | NA                                   | rs74422309 | NA |
| chr1  | 1.45E+08 | 1.45E+08 | G | T | exonic       | SEC22B    | unknown           | UNKNOWN                                                                       | NA                                   | rs2596331  | NA |
| chr1  | 1.53E+08 | 1.53E+08 | G | T | UTR3         | LCE1E     | NA                | NA                                                                            | NA                                   | s11447009  | NA |
| chr1  | 1.71E+08 | 1.71E+08 | G | T | ncRNA_exonic | FMO6P     | NA                | NA                                                                            | NA                                   | rs11812061 | NA |
| chr3  | 18427924 | 18427924 | G | T | exonic       | SATB1     | synonymous SNV    | SATB1:NM_001195470:exon8:c.C1386A:p.P46                                       | NA                                   | rs2229261  | NA |
| chr3  | 75787202 | 75787202 | G | T | exonic       | ZNF717    | synonymous SNV    | ZNF717:NM_001128223:exon5:c.C1572A:p.V524                                     | NA                                   | rs76713735 | NA |
| chr3  | 1.96E+08 | 1.96E+08 | G | T | exonic       | MUC4      | nonsynonymous SNV | MUC4:NM_018406:exon2:c.C11200A:p.P3734T                                       | NA                                   | s20145660  | NA |
| chr4  | 1.76E+08 | 1.76E+08 | G | T | UTR5         | ADAM29    | NA                | NA                                                                            | NA                                   | rs7689299  | NA |
| chr4  | 1.84E+08 | 1.84E+08 | G | T | exonic       | WWC2      | nonsynonymous SNV | WWC2:NM_024949:exon16:c.G2446T:p.V816F                                        | NA                                   | rs11734376 | NA |
| chr5  | 1.31E+08 | 1.31E+08 | G | T | UTR3         | CDC42SE2  | NA                | NA                                                                            | NA                                   | NA         | NA |
| chr6  | 29912087 | 29912087 | G | T | exonic       | HLA-A     | nonsynonymous SNV | HLA-A:NM_002116:exon4:c.G808T:p.A270S,HLA-A:NM_002116:exon4:c.G808T:p.A270S   | NA                                   | rs1059632  | B  |
| chr6  | 30232538 | 30232538 | G | T | ncRNA_exonic | HLA-L     | NA                | NA                                                                            | NA                                   | rs28780091 | NA |
| chr6  | 57512779 | 57512779 | G | T | UTR3         | PRIM2     | NA                | NA                                                                            | NA                                   | rs76296076 | NA |
| chr6  | 1.62E+08 | 1.62E+08 | G | T | UTR3         | PARK2     | NA                | NA                                                                            | NA                                   | rs68121389 | NA |
| chr8  | 1.45E+08 | 1.45E+08 | G | T | UTR3         | GRINA     | NA                | NA                                                                            | NA                                   | rs9100     | NA |
| chr9  | 14993419 | 14993419 | G | T | ncRNA_exonic | LOC389705 | NA                | NA                                                                            | NA                                   | rs4548277  | NA |
| chr9  | 41960898 | 41960898 | G | T | ncRNA_exonic | KGFLP2    | NA                | NA                                                                            | NA                                   | s20176116  | NA |
| chr9  | 1.35E+08 | 1.35E+08 | G | T | UTR3         | SETX      | NA                | NA                                                                            | NA                                   | rs11787894 | NA |
| chr10 | 1228330  | 1228330  | G | T | UTR3         | ADARB2    | NA                | NA                                                                            | NA                                   | rs1129226  | NA |
| chr11 | 1017317  | 1017317  | G | T | exonic       | MUC6      | synonymous SNV    | MUC6:NM_005961:exon31:c.C5484A:p.T1828T                                       | NA                                   | rs33943903 | NA |
| chr11 | 1018300  | 1018300  | G | T | exonic       | MUC6      | nonsynonymous SNV | MUC6:NM_005961:exon31:c.C4501A:p.P1501T                                       | NA                                   | s11374499  | NA |
| chr11 | 43940644 | 43940644 | G | T | exonic       | ALKBH3    | synonymous SNV    | ALKBH3:NM_139178:exon9:c.G726T:p.G242G                                        | NA                                   | rs1048928  | NA |
| chr11 | 1.17E+08 | 1.17E+08 | G | T | exonic       | DSCAML1   | nonsynonymous SNV | DSCAML1:NM_020693:exon4:c.C694A:p.H232M                                       | ID=COSM147330;OCCURENCE=1(stomach)   | rs3741280  | NA |
| chr12 | 7945640  | 7945640  | G | T | exonic       | NANOG     | nonsynonymous SNV | NANOG:NM_024865:exon2:c.G246T:p.K82N                                          | NA                                   | rs2889551  | B  |
| chr12 | 64538324 | 64538324 | G | T | UTR3         | SRGAP1    | NA                | NA                                                                            | NA                                   | rs789736   | NA |
| chr12 | 1.31E+08 | 1.31E+08 | G | T | UTR5         | GPR133    | NA                | NA                                                                            | NA                                   | rs56090874 | NA |
| chr15 | 23448270 | 23448270 | G | T | ncRNA_exonic | GOLGA8EP  | NA                | NA                                                                            | NA                                   | s20023585  | NA |
| chr16 | 1139446  | 1139446  | G | T | UTR3         | C1QTNF8   | NA                | NA                                                                            | NA                                   | rs183188   | NA |
| chr17 | 37223344 | 37223344 | G | T | ncRNA_UTR3   | PLXDC1    | NA                | NA                                                                            | NA                                   | rs72821577 | NA |
| chr17 | 39395019 | 39395019 | G | T | UTR3         | KRTAP9-8  | NA                | NA                                                                            | NA                                   | rs74975222 | NA |
| chr17 | 46941419 | 46941419 | G | T | UTR3         | CALCOCO2  | NA                | NA                                                                            | NA                                   | rs6504584  | NA |
| chr19 | 4153655  | 4153655  | G | T | UTR5         | CREB3L3   | NA                | NA                                                                            | NA                                   | NA         | NA |
| chr19 | 13054781 | 13054781 | G | T | UTR3         | CALR      | NA                | NA                                                                            | NA                                   | rs1049481  | NA |
| chr19 | 22379587 | 22379587 | G | T | UTR5         | ZNF676    | NA                | NA                                                                            | NA                                   | rs2360001  | NA |
| chr19 | 53381429 | 53381429 | G | T | UTR3         | ZNF320    | NA                | NA                                                                            | NA                                   | rs2162919  | NA |
| chr19 | 55401447 | 55401447 | G | T | UTR3         | FCAR      | NA                | NA                                                                            | NA                                   | rs58560391 | NA |
| chr22 | 24314006 | 24314006 | G | T | UTR3         | DDTL      | NA                | NA                                                                            | NA                                   | rs1006771  | NA |
| chr22 | 25024072 | 25024072 | G | T | exonic       | GGT1      | nonsynonymous SNV | GGT1:NM_005265:exon14:c.G1361T:p.C454F,GGT1:NM_005265:exon14:c.G1361T:p.C454F | NA                                   | s19968146  | D  |
